# Supplementary material
Source: PubMed Central journal article supplement (PMC9650613)
Supplement: NIHMS1846453-supplement-Supporting_information.pdf [file NIHMS1846453-supplement-Supporting_information.pdf]

## SUPPORTING INFORMATION

### Copper-Catalyzed Three-Component Aminofluorination of Alkenes and 1,3-Dienes: Direct Entry to Diverse $\beta$ -Fluoro Alkylamines

Guangshou Feng,<sup>§</sup> Colton K. Ku,<sup>§</sup> Jiaqi Zhao, and Qiu Wang\*

Department of Chemistry, Duke University, Durham NC 27708  
Email: [qiu.wang@duke.edu](mailto:qiu.wang@duke.edu)

#### Table of Contents

|                                                                               |      |
|-------------------------------------------------------------------------------|------|
| 1. General Methods .....                                                      | S1   |
| 2. Optimization Screens of Alkene Aminofluorination Reaction Conditions ..... | S1   |
| 3. Preparation of Starting Materials .....                                    | S4   |
| 4. Scope of alkenes and compound characterization data .....                  | S9   |
| 5. Scope of amines and compound characterization data.....                    | S19  |
| 6. Amino fluorination of 1,3-dienes and compound characterization data .....  | S26  |
| 7. Synthetic applications.....                                                | S32  |
| 8. Mechanism studies .....                                                    | S39  |
| 9. References .....                                                           | S41  |
| 10. Copies of the NMR spectra .....                                           | S42  |
| 11. X-ray crystallography information.....                                    | S283 |

# 1. General Methods

## General Procedures

Round-bottom flasks and stir bars were dried either with a propane torch or in an oven at 140 °C overnight and cooled/stored in a desiccator filled with Drierite. Optimization and substrate screens were performed in 10-mL FEP Tubes without prior drying, and a Teflon-coated micro stir bar. All other reactions were performed in round-bottom flasks with rubber septa and Teflon-coated stir bars. Plastic syringes were used for the transfer of pure solvents, while glass pipets were used for transfer of crude reaction mixtures. Analytical thin-layer chromatography (TLC) was performed using aluminum plates coated with a 0.25 mm layer of 230–400 mesh silica gel with fluorescent indicator (254 nm). TLC plates were visualized by exposure to ultraviolet light and treatment with mainly vanillin or phosphomolybdic acid (PMA) stain. Organic solutions were concentrated under reduced pressure using a rotary evaporator and flash chromatography performed using 60 Å silica gel and HPLC-grade solvents.

## Materials

Commercial reagents and anhydrous solvents were used as received. Specific anhydrous solvents (CH<sub>2</sub>Cl<sub>2</sub>, Toluene, Dioxane, and THF) were obtained from the Innovative Technologies solvent purification system. Commercially available substrates were purchased in >95% purity and used without further purification.

## Instrumentation

Nuclear magnetic resonance spectra were recorded on either a Varian 400 MHz spectrometer or Bruker 500 MHz spectrometer at room temperature. Chemical shifts for <sup>1</sup>H NMR are reported in parts per million (ppm, δ) and referenced to residual protium in CDCl<sub>3</sub> (δ 7.26). NMR values are reported as follows: chemical shift, multiplicity (s = singlet, d = doublet, t = triplet, q = quartet, quin = quintet, m = multiplet, br = broad), coupling constant (Hz), and integration. Infrared spectroscopic data are reported in wavenumbers (cm<sup>-1</sup>) with selected peaks shown. High-resolution mass spectra were obtained using a liquid chromatography-electrospray ionization and time-of-flight mass spectrometer. The X-ray single crystal data and refinement was obtained from UNC Chapel Hill department of chemistry X-ray Core Laboratory.

## 2. Optimization Screens for Alkene Aminofluorination Reaction Conditions

### General procedure 1(GP1) for optimization screening

To a 10-mL FEP tube with Teflon-coated micro stir bar was added *O*-benzoylhydroxylamine and copper catalyst. Solvent (1.0 mL), 4-methylstyrene, and fluorinating reagent were sequentially added via syringe. The mixture was then stirred and heated at the indicated temperature until the consumption of *O*-benzoylhydroxylamine, verified by TLC analysis. The resulting reaction mixture was cooled to room temperature and quenched by the addition of Et<sub>3</sub>N (0.5 mL). The solution was then diluted with ethyl acetate to a final volume of 5.0 mL and filtered through a plug of activated, neutral Al<sub>2</sub>O<sub>3</sub> (Brockman grade I, 58–60Å). The filtrate was concentrated under reduced pressure, providing the crude reaction mixture. The crude reaction mixture was either purified by silica column chromatography or added to CDCl<sub>3</sub> (0.5 mL) with CH<sub>2</sub>Br<sub>2</sub> (0.1 mmol) as a quantitative internal standard for NMR analysis.

**Table S1.** Screening of fluoride sources.<sup>a</sup>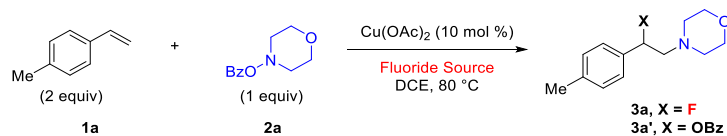

| Entry    | Fluoride source                                         | Fluoride (equiv) | <b>3a</b> (%) <sup>b</sup> | <b>3a'</b> (%) <sup>b</sup> |
|----------|---------------------------------------------------------|------------------|----------------------------|-----------------------------|
| 1        | $\text{Py}(\text{HF})_x$                                | 2.0              | 0                          | 0                           |
| 2        | AgF                                                     | 2.0              | 0                          | 0                           |
| 3        | CsF                                                     | 2.0              | 0                          | 11                          |
| 4        | TBAF                                                    | 2.0              | 0                          | 0                           |
| 5        | $\text{Et}_3\text{N}\cdot 3\text{HF}$                   | 2.0              | 40                         | 6                           |
| <b>6</b> | <b><math>\text{Et}_3\text{N}\cdot 3\text{HF}</math></b> | <b>10.0</b>      | <b>50 (50)<sup>c</sup></b> | <b>trace</b>                |

<sup>a</sup>Reaction conditions: **1a** (2.0 equiv), **2a** (0.2 mmol, 1.0 equiv), fluoride source (2 or 10 equiv),  $\text{Cu}(\text{OAc})_2$  (10 mol %), DCE (1.0 mL), 80 °C, 2 h. <sup>b</sup>Yields determined by <sup>1</sup>H NMR spectroscopy with  $\text{CH}_2\text{Br}_2$  as a quantitative internal standard. <sup>c</sup>Isolated yield.

**Table S2.** Screening of copper catalysts.<sup>a</sup>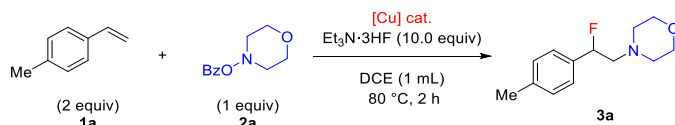

| Entry    | $[\text{Cu}]$ cat.                                  | <b>3a</b> (%) <sup>b</sup>  |
|----------|-----------------------------------------------------|-----------------------------|
| 1        | $[\text{Cu}(\text{OTf})_2]\text{PhMe}$              | 50                          |
| 2        | $\text{Cu}(\text{OAc})$                             | 50                          |
| 3        | $\text{CuCl}_2$                                     | 40                          |
| 4        | $\text{CuCl}$                                       | 44                          |
| 5        | $\text{Cu}(\text{eh})_2$                            | 60                          |
| 6        | $\text{Cu}(\text{MeCN})_4\text{PF}_6$               | 52                          |
| <b>7</b> | <b><math>\text{IPrCuCl}</math></b>                  | <b>62 (68%)<sup>c</sup></b> |
| 8        | $\text{CuF}_2$                                      | 54                          |
| 9        | $\text{CuBr}$                                       | 52                          |
| 10       | $\text{CuI}$                                        | 12                          |
| 11       | $\text{CuCN}$                                       | 30                          |
| 12       | $\text{CuTC}$                                       | 52                          |
| 13       | $\text{Cu}(\text{PhCO}_2)_2$                        | 52                          |
| 14       | $\text{Cu}(\text{NO}_2)_2\cdot 3\text{H}_2\text{O}$ | 40                          |
| 15       | $\text{CuSCN}$                                      | 52                          |
| 16       | $\text{CuSO}_4$                                     | 54                          |
| 17       | $\text{CuSO}_4\cdot 5\text{H}_2\text{O}$            | 50                          |
| 18       | $\text{CuO}$                                        | 68 (67) <sup>c</sup>        |

|    |                                           |                            |
|----|-------------------------------------------|----------------------------|
| 19 | CuO <sub>2</sub>                          | 58                         |
| 20 | Cu(OTf) <sub>2</sub>                      | 54                         |
| 21 | CuBr <sub>2</sub>                         | 42                         |
| 22 | Cu(MeCN)BF <sub>4</sub>                   | 54                         |
| 23 | Cu(OAc) <sub>2</sub>                      | 48 (47) <sup>c</sup>       |
| 24 | Cu(OAc) <sub>2</sub>                      | 50 (50) <sup>c</sup>       |
| 25 | Cu(TFA) <sub>2</sub>                      | 59                         |
| 26 | Cu(OPiv) <sub>2</sub>                     | 65                         |
| 27 | <b>Cu(acac)<sub>2</sub></b>               | <b>76 (76)<sup>c</sup></b> |
| 28 | <b>Cu(HFacac)<sub>2</sub></b>             | <b>81 (83)<sup>c</sup></b> |
| 29 | <b>Cu(HFacac)<sub>2</sub> (2.5 mol %)</b> | <b>82 (83)<sup>c</sup></b> |

<sup>a</sup> Reaction conditions: **1a** (2.0 equiv), **2a** (0.2 mmol, 1.0 equiv), fluoride source (10 equiv), copper cat. (2.5–10 mol %), DCE (1.0 mL), 80 °C, 2 h. <sup>b</sup>Yields determined by <sup>1</sup>H NMR spectroscopy with CH<sub>2</sub>Br<sub>2</sub> as a quantitative internal standard. <sup>c</sup>Isolated yields.

**Table S3.** Screening of solvents.<sup>a</sup>

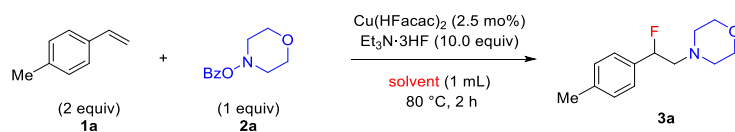

| Entry    | Solvent     | <b>3a</b> (%) <sup>b</sup> |
|----------|-------------|----------------------------|
| 1        | DME         | 30                         |
| 2        | 1,4-Dioxane | 46                         |
| 3        | THF         | 24                         |
| 4        | Toluene     | 20                         |
| <b>5</b> | <b>DCE</b>  | <b>83</b>                  |
| 6        | MeCN        | 40                         |

<sup>a</sup>Reaction conditions: **1a** (2.0 equiv), **2a** (0.2 mmol, 1.0 equiv), Et<sub>3</sub>N·3HF (10 equiv), solvent (1.0 mL), 80 °C, 2 h.

<sup>b</sup>Yields determined by <sup>1</sup>H NMR spectroscopy with CH<sub>2</sub>Br<sub>2</sub> as a quantitative internal standard.

## Reaction progress and completion time testing

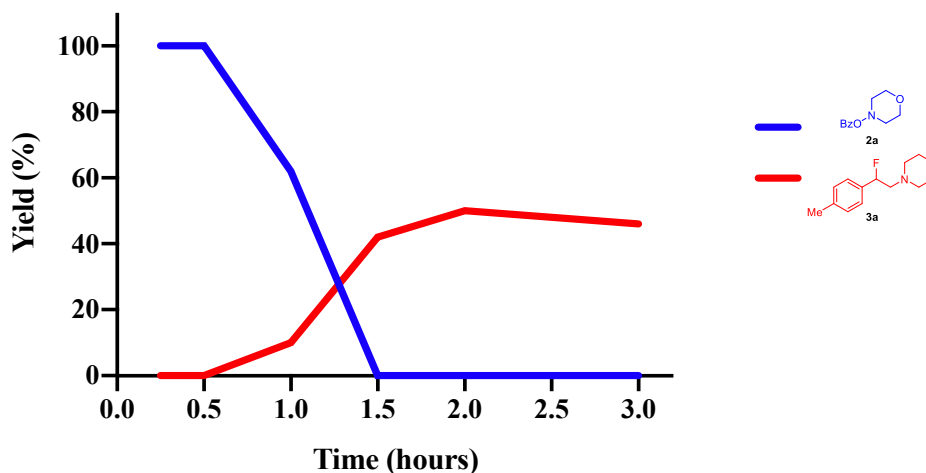

To determine reaction progress and completion time of the above transformation, seven reactions with 4-methylstyrene **1a** (0.2 mmol scale) and *O*-benzoyl hydroxymorpholine **2a** were subject to **GPI**, and quenched at 0.25, 0.5, 1.0, 1.5, 2.0, 2.5, and 3.0 h, respectively. Crude NMR yields using CH<sub>2</sub>Br<sub>2</sub> as a quantitative internal standard were used to generate the above graph, which indicates complete consumption of the hydroxylamine occurs within 1.5 h and the formation of the product finishes within 2.0 h.

## 3. Preparation of Starting Materials

### 3.1. Preparation of hydroxylamine derivatives and compound characterizations.

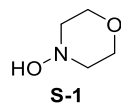

**Morpholin-4-ol (S-1).** To a 250-mL round-bottom flask was added NaOMe (1.59 g, 28 mmol, 1.4 equiv) and MeOH (70 mL). In a separate 100-mL round-bottom flask was added *O*-benzoyl-*N*-hydroxymorpholine **2a** (4.14 g, 20 mmol, 1.0 equiv) and Et<sub>2</sub>O (60 mL). The dissolved hydroxylamine ester was then added via syringe to the solution of NaOMe. The mixture was allowed to stir for 1 h, and then directly dried *in vacuo*. The crude mixture was purified by flash column chromatography (30% ethyl acetate–hexanes to 40% ethyl acetate–hexanes) to afford morpholin-4-ol (**S-1**) as colorless oil (1.33 g, 69%). Spectroscopic data match the commercially available *N*-hydroxylamine (CAS 5765-63-9).

<sup>1</sup>H NMR (400 MHz, CDCl<sub>3</sub>) δ 6.56 (br, 1H), 3.91 (d, *J* = 12.0 Hz, 2H), 3.76–3.47 (m, 2H), 3.14 (d, *J* = 11.0 Hz, 2H), 2.72 (td, *J* = 11.0, 3.2 Hz, 2H).

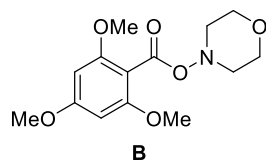

**Morpholino 2,4,6-trimethoxybenzoate (B).** To a 100-mL round-bottom flask was added 2,4,6-trimethoxybenzoic acid (0.849 g, 4.0 mmol, 1.0 equiv), CH<sub>2</sub>Cl<sub>2</sub> (10 mL), oxalyl chloride (406 μL,

4.8 mmol, 1.2 equiv), and dimethylformamide (0.2 mL). Upon the discontinuation of gas evolution, the mixture was directly concentrated under reduced pressure. The mixture was next diluted with CH<sub>2</sub>Cl<sub>2</sub> (10 mL), and morpholin-4-ol (433 mg, 4.2 mmol, 1.05 equiv) was added over 5 min, followed by the addition of triethylamine (585 μL, 4.2 mmol, 1.05 equiv). Upon consumption of acid starting material (monitored by TLC), the reaction was quenched through the addition of saturated aqueous NH<sub>4</sub>Cl (10 mL) and H<sub>2</sub>O (20 mL). The organic layers were separated, and washed with saturated aqueous NH<sub>4</sub>Cl (10 mL × 3), saturated aqueous NaHCO<sub>3</sub> (10 mL × 3), H<sub>2</sub>O (10 mL × 3), and brine (10 mL × 2). The organic layer was dried over Na<sub>2</sub>SO<sub>4</sub>, and filtered. The filtrate was concentrated *in vacuo*. Purification by flash column chromatography (20% ethyl acetate–hexanes to 60% ethyl acetate–hexanes) gave **B** as a white solid (493 mg, 42%). Spectroscopic data matched the reported literature.<sup>1</sup>

$R_f$  = 0.33 (10% MeOH, 40% ethyl acetate, 50% hexanes).

<sup>1</sup>H NMR (500 MHz, CDCl<sub>3</sub>) δ 6.08 (s, 2H), 3.98–3.75 (m, 13H), 3.44 (d, *J* = 9.3 Hz, 2H), 3.04–2.90 (m, 2H).

<sup>13</sup>C NMR (125 MHz, CDCl<sub>3</sub>) δ 164.5, 162.9, 158.9, 104.3, 90.6, 65.8, 56.8, 55.9, 55.4.

FTIR (thin film): cm<sup>-1</sup> 2965, 2845, 1748, 1607, 1590, 1458, 1243, 1228, 1129, 1039.

HRMS (ESI) *m/z*: [M+H]<sup>+</sup> Calcd for C<sub>14</sub>H<sub>20</sub>NO<sub>6</sub><sup>+</sup> 298.1285; found: 298.1287.

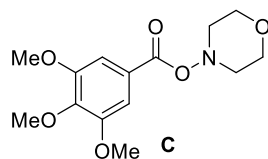

**Morpholino 3,4,5-trimethoxybenzoate (C).** To a 100-mL round-bottom flask was added 3,4,5-trimethoxybenzoic acid (1.02 g, 4.8 mmol, 1.2 equiv), CH<sub>2</sub>Cl<sub>2</sub> (15 mL), and 1,1'-carbonyldiimidazole (778 mg, 4.8 mmol, 1.2 equiv). The mixture was allowed to stir overnight, until the formation of CO<sub>2</sub> gas halted. Morpholin-4-ol (413 mg, 4.0 mmol, 1.0 equiv) was next added in CH<sub>2</sub>Cl<sub>2</sub> (5 mL). The mixture was allowed to stir until the consumption of hydroxylamine (monitored by TLC). The solvent was removed *in vacuo*. The crude mixture was diluted with ethyl acetate (10 mL) and H<sub>2</sub>O (10 mL). The organic layer was separated, washed with H<sub>2</sub>O (10 mL × 2), saturated aqueous NH<sub>4</sub>Cl (10 mL × 3), brine (10 mL × 2), dried over Na<sub>2</sub>SO<sub>4</sub>, and filtered. The filtrate was concentrated *in vacuo* to afford the crude product. Purification by flash column chromatography (40% ethyl acetate–hexanes to 50% ethyl acetate–hexanes) gave **C** as a white solid (716 mg, 60%). Spectroscopic data matched the reported literature.<sup>2</sup>

<sup>1</sup>H NMR (400 MHz, CDCl<sub>3</sub>): δ 7.25 (s, 2H), 4.02–3.78 (m, 13H), 3.52–3.39 (m, 2H), 3.11–2.96 (m, 2H).

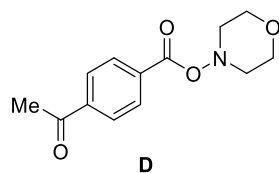

**Morpholino 4-acetylbenzoate (D).** To a 100-mL round-bottom flask was added 4-acetylbenzoic acid (0.657 g, 4.0 mmol, 1.0 equiv), CH<sub>2</sub>Cl<sub>2</sub> (10 mL), oxalyl chloride (406 μL, 4.8 mmol, 1.2 equiv), and dimethylformamide (0.2 mL). Upon the discontinuation of gas evolution, the mixture was directly concentrated under reduced pressure. The mixture was next diluted with CH<sub>2</sub>Cl<sub>2</sub> (10 mL), and morpholin-4-ol (433 mg, 4.2 mmol, 1.05 equiv) was added over 5 min, followed by the addition of triethylamine (585 μL, 4.2 mmol, 1.05 equiv). Upon consumption of acid starting material (monitored by TLC), the reaction was quenched by the addition of saturated aqueous NH<sub>4</sub>Cl (10 mL) and H<sub>2</sub>O (20 mL). The separated organic layer was washed with saturated aqueous NH<sub>4</sub>Cl (10 mL × 3), saturated aqueous NaHCO<sub>3</sub> (10 mL × 3), H<sub>2</sub>O (10 mL × 3), and brine (10 mL × 2), dried over Na<sub>2</sub>SO<sub>4</sub>, and filtered. The

filtrate was concentrated *in vacuo*. Purification by flash column chromatography (10% ethyl acetate–hexanes to 30% ethyl acetate–hexanes) gave **D** as a white solid (545 mg, 55%).

$R_f$  = 0.18 (30% ethyl acetate–hexanes).

$^1\text{H NMR}$  (500 MHz,  $\text{CDCl}_3$ )  $\delta$  8.09 (d,  $J$  = 8.4 Hz, 2H), 8.01 (d,  $J$  = 8.4 Hz, 2H), 4.08–3.72 (m, 4H), 3.57–3.34 (m, 2H), 3.14–2.90 (m, 2H), 2.65 (s, 3H).

$^{13}\text{C NMR}$  (125 MHz,  $\text{CDCl}_3$ ):  $\delta$  197.3, 163.7, 140.4, 132.9, 129.7, 128.2, 65.8, 57.0, 26.8.

**FTIR** (thin film):  $\text{cm}^{-1}$  2967, 2900, 2858, 1737, 1685, 1404, 1240, 1100, 1083, 857, 763.

**HRMS** (ESI)  $m/z$ :  $[\text{M}+\text{H}]^+$  Calcd for  $\text{C}_{13}\text{H}_{16}\text{NO}_4^+$  250.1074; found: 250.1077.

## General procedure 2 (GP2) for the preparation of hydroxylamine starting materials E, F and G.

To a 15-mL round-bottom flask was added morpholin-4-ol (433 mg, 4.2 mmol, 1.05 equiv), dimethylaminopyridine (9.0 mg, 0.075 mmol, 0.019 equiv), freshly distilled  $\text{CH}_2\text{Cl}_2$  (2 mL), and triethylamine (0.59 mL, 4.2 mmol, 1.05 equiv). To the reaction flask at 0 °C was added the solution of acyl chloride (4.0 mmol, 1.0 equiv) in  $\text{CH}_2\text{Cl}_2$  (2 mL). The mixture was allowed to stir at room temperature for 30 min, until the consumption of acyl chloride (monitored by TLC). The reaction mixture was then washed with aqueous solution of HCl (1 M, 5 mL x 2). The separated organic layer was dried over  $\text{Na}_2\text{SO}_4$ , filtered, and the filtrate was concentrated *in vacuo*. Purification by column chromatography (5% MeOH, 30% ethyl acetate, 65% hexanes unless otherwise noted) generated the desired product.

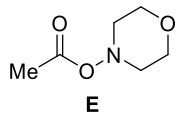

**Morpholino acetate (E)** Preparation *via* **GP2** gave **E** as a light-yellow oil (375 mg, 65%).

$R_f$  = 0.34 (50% Ethyl acetate–hexanes).

$^1\text{H NMR}$  ( $\text{CDCl}_3$ , 500 MHz):  $\delta$  3.85 (d,  $J$  = 10.9 Hz, 2H), 3.77–3.65 (br. m, 2H), 3.23 (d,  $J$  = 9.6 Hz, 2H), 2.87–2.76 (br. m, 2H), 1.99 (s, 3H).

$^{13}\text{C NMR}$  ( $\text{CDCl}_3$ , 125 MHz):  $\delta$  168.8, 65.6, 56.7, 19.5.

**FTIR** (thin film):  $\text{cm}^{-1}$  1756, 1210, 1102, 1003, 891, 857.

**HRMS** (ESI)  $m/z$ :  $[\text{M}+\text{Na}]^+$  Calcd for  $\text{C}_6\text{H}_{11}\text{NO}_3\text{Na}^+$  168.0631; found: 168.0628.

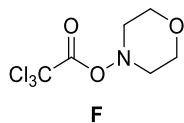

**Morpholino 2,2,2-trichloroacetate (F)**. Preparation *via* **GP2** and purification by column chromatography (20% ethyl acetate–hexanes) gave **F** as a yellow solid (726 mg, 73%).

$R_f$  = 0.34 (50% ethyl acetate–hexanes).

$^1\text{H NMR}$  ( $\text{CDCl}_3$ , 500 MHz):  $\delta$  3.97 (d,  $J$  = 11.9 Hz, 2H), 3.82–3.72 (br. m, 2H), 3.43 (d,  $J$  = 9.9 Hz, 2H), 3.11–3.01 (br. m, 2H).

$^{13}\text{C NMR}$  ( $\text{CDCl}_3$ , 125 MHz):  $\delta$  160.0, 88.9, 65.6, 56.8.

**FTIR** (thin film):  $\text{cm}^{-1}$  1777, 1460, 1267, 1194, 1098, 962, 865, 812, 674.

**HRMS** (ESI)  $m/z$ :  $[\text{M}+\text{H}]^+$  Calcd for  $\text{C}_6\text{H}_9^{35}\text{Cl}_3\text{NO}_3^+$  247.9643; found: 247.9643.

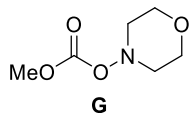

**Methyl morpholino carbonate (G).** Preparation via **GP2** gave **G** as a light-yellow oil (496 mg, 77%).

$R_f = 0.48$  (50% ethyl acetate–hexanes).

$^1\text{H NMR}$  ( $\text{CDCl}_3$ , 500 MHz):  $\delta$  3.91 (d,  $J = 11.3$  Hz, 2H), 3.80 (s, 3H), 3.77–3.70 (br. m, 2H), 3.34 (d,  $J = 9.7$  Hz, 2H), 3.00–2.85 (br. m, 2H).

$^{13}\text{C NMR}$  ( $\text{CDCl}_3$ , 125 MHz):  $\delta$  154.8, 65.6, 56.8, 54.9.

**FTIR** (thin film):  $\text{cm}^{-1}$  1767, 1440, 1268, 1229, 1100, 1052, 860.

**HRMS** (ESI)  $m/z$ :  $[\text{M}+\text{H}]^+$  Calcd for  $\text{C}_6\text{H}_{12}\text{NO}_4^+$  162.0761; found: 162.0761.

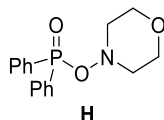

**Morpholino diphenylphosphinate (H).** **H** was synthesized following a previously reported method with modification.<sup>3</sup> To a 10-mL round-bottom flask added morpholin-4-ol (412 mg, 4.0 mmol, 1.0 equiv), triethylamine (1.39 mL, 10 mmol, 2.5 equiv) and  $\text{CH}_2\text{Cl}_2$  (0.5 mL). To the reaction flask at 0 °C, was added diphenylphosphinyl chloride (1.92 mL, 4.8 mmol, 1.2 equiv). The reaction mixture was allowed to stir at room temperature, until the consumption of morpholin-4-ol. Solvents were then removed under reduced pressure. To the residue, was added diethyl ether (10 mL) and decanted for four times. The combined extracts were filtered through a silica/celite pad and concentrated in *vacuo* to give **H** as a white solid (308 mg, 1.01 mmol, 25%).

$R_f = 0.13$  (50% ethyl acetate–hexanes).

$^1\text{H NMR}$  ( $\text{CDCl}_3$ , 500 MHz):  $\delta$  7.84 (d,  $J = 8.0$  Hz, 2H), 7.82 (d,  $J = 8.0$  Hz, 2H), 7.55–7.50 (m, 2H), 7.47–7.41 (m, 4H), 3.82 (d,  $J = 11.8$  Hz, 2H), 3.58–3.50 (br. m, 2H), 3.25 (d,  $J = 10.3$  Hz, 2H), 3.04–2.96 (br. m, 2H).

$^{13}\text{C NMR}$  ( $\text{CDCl}_3$ , 125 MHz):  $\delta$  132.2 (d,  $J_{\text{C-P}} = 2.7$  Hz), 131.9 (d,  $J_{\text{C-P}} = 9.9$  Hz), 130.7 (d,  $J_{\text{C-P}} = 135.3$  Hz), 128.31 (d,  $J_{\text{C-P}} = 12.9$  Hz), 65.8, 58.7 (d,  $J_{\text{C-P}} = 2.7$  Hz).

$^{31}\text{P NMR}$  ( $\text{CDCl}_3$ , 202 MHz):  $\delta$  33.63–33.36 (m).

**FTIR** (thin film):  $\text{cm}^{-1}$  1438, 1227, 1128, 1020, 866, 787, 726, 693, 546, 530.

**HRMS** (ESI)  $m/z$ :  $[\text{M}+\text{H}]^+$  Calcd for  $\text{C}_{16}\text{H}_{19}\text{NO}_3\text{P}^+$  304.1097; found: 304.1092.

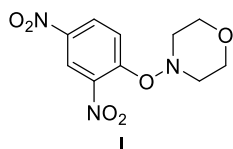

**4-(2,4-Dinitrophenoxy)morpholine (I).** Prepared following a previously reported method.<sup>4</sup> Spectroscopic data were in agreement.

$^1\text{H NMR}$  (400 MHz,  $\text{CDCl}_3$ )  $\delta$  8.81 (s, 1H), 8.41 (d,  $J = 9.3$  Hz, 1H), 7.90 (d,  $J = 9.3$  Hz, 1H), 4.06 (d,  $J = 11.4$  Hz, 2H), 3.75 (t,  $J = 11.4$  Hz, 2H), 3.33 (d,  $J = 10.3$  Hz, 2H), 3.16 (t,  $J = 10.3$  Hz, 2H).

*O*-Benzoylhydroxylamines below were synthesized according to the literature procedure.<sup>5</sup>



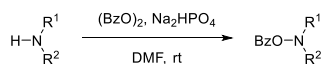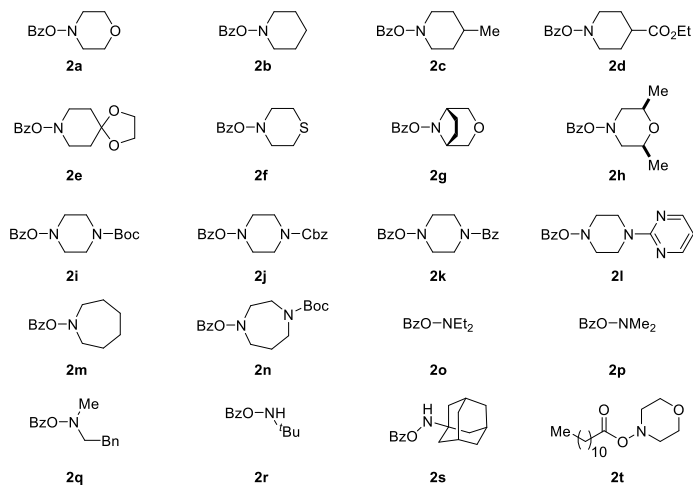

#### 4-Acryloylpiperazin-1-yl benzoate (**2u**)

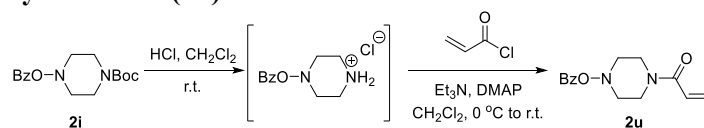

To a 25-mL round-bottom flask was added *tert*-butyl 4-(benzoyloxy)piperazine-1-carboxylate **2i** (306 mg, 1.0 mmol, 1.0 equiv),  $\text{CH}_2\text{Cl}_2$  (4.0 mL), the solution of HCl in dioxane (4M, 2 mL, 8.0 mmol, 8.0 equiv). The reaction mixture was allowed to stir at room temperature for 8 h, and then concentrated under reduced pressure. The crude solid was used for the next step without further purification.

To a solution of the crude residue in  $\text{CH}_2\text{Cl}_2$  (4 mL) at 0 °C, was added trimethylamine (202 mg, 2.0 mmol, 2.0 equiv), DMAP (2.4 mg, 0.02 mmol, 0.02 equiv), and acryloyl chloride (91 mg, 1.0 mmol, 1.0 equiv). Then mixture was allowed to warm to room temperature and stir overnight. The mixture was diluted with  $\text{CH}_2\text{Cl}_2$  (20 mL). The organic layer was washed with water (10 mL  $\times$  2) and the brine (10 mL). The organic layer was dried over  $\text{Na}_2\text{SO}_4$ , filtered and concentrated *in vacuo*. Purification by flash column chromatography (30% ethyl acetate–hexanes to 50% ethyl acetate–hexanes) gave **2u** as a colorless oil (225 mg, 87% over two steps).

$R_f$  = 0.10 (50% ethyl acetate–hexanes).

$^1\text{H NMR}$  ( $\text{CDCl}_3$ , 500 MHz):  $\delta$  7.97 (t,  $J$  = 19.7 Hz, 2H), 7.58 (t,  $J$  = 7.4 Hz, 1H), 7.45 (t,  $J$  = 7.4 Hz, 2H), 6.58 (dd,  $J$  = 16.8, 10.6 Hz, 1H), 6.33 (dd,  $J$  = 16.8, 1.8 Hz, 1H), 5.74 (dd,  $J$  = 10.6, 1.8 Hz, 1H), 4.67–4.38 (m, 1H), 4.22–3.82 (m, 1H), 3.70–3.57 (m, 1H), 3.57–3.44 (m, 2H), 3.42–3.25 (m, 1H), 3.09–2.58 (m, 2H).

$^{13}\text{C NMR}$  ( $\text{CDCl}_3$ , 125 MHz):  $\delta$  165.4, 164.5, 133.4, 129.5, 128.9, 128.6, 128.5, 127.0, 56.1, 55.7, 43.9, 40.3.

**FTIR** (thin film):  $\text{cm}^{-1}$  1736, 1647, 1613, 1438, 1246, 1085, 1019, 709.

**HRMS** (ESI)  $m/z$ :  $[\text{M}+\text{Na}]^+$  Calcd for  $\text{C}_{14}\text{H}_{16}\text{N}_2\text{O}_3\text{Na}^+$  283.1053; found: 283.1047.

### 3.2. Preparation of olefin substrates and compound characterization.

Olefins (**1a–1q** and **1u–1z**) were purchased from commercial sources and used directly without further purification. **1r–1s**,<sup>6</sup> and **1t**<sup>7</sup> are known alkenes.

## 4. Scope of alkenes and compound characterization data

### General procedure 3 (GP3) for alkene aminofluorination reactions

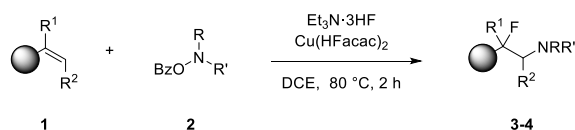

To a 10-mL FEP tube with Teflon-coated micro stir bar was added *O*-benzoylhydroxylamine **2** (0.2 mmol, 1.0 equiv) and Cu(HFacac)<sub>2</sub> (2.4 mg, 2.5 mol%). DCE (1.0 mL), alkene **1** (0.4 mmol, 2.0 equiv), and Et<sub>3</sub>N·3HF (322 mg, 2 mmol, 10 equiv) were sequentially added. The mixture was allowed to stir at 80 °C for 2 h until the consumption of *O*-benzoylhydroxylamine (verified by TLC, 20% ethyl acetate–hexanes). The resulting reaction mixture was cooled to room temperature and quenched through the addition of Et<sub>3</sub>N (0.5 mL). The solution was then diluted with ethyl acetate to a final volume of 5.0 mL and filtered through a plug of activated, neutral Al<sub>2</sub>O<sub>3</sub> (Brockman grade I, 58–60Å). The filtrate was concentrated under reduced pressure, providing the crude reaction mixture. The crude reaction mixture was purified by silica column chromatography.

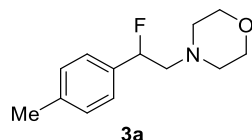

**4-(2-Fluoro-2-(*p*-tolyl)ethyl)morpholine (3a).** Synthesized using GP3 from **1a** and *O*-benzoylhydroxylmorpholine **2a**. Isolated by flash column chromatography (10% ethyl acetate–hexanes to 30% ethyl acetate–hexanes), as a pale-yellow oil (37.3 mg, 83%).

$R_f$  = 0.14 (30% ethyl acetate–hexanes).

<sup>1</sup>H NMR (500 MHz, CDCl<sub>3</sub>) δ 7.23 (d,  $J$  = 7.9 Hz, 2H), 7.18 (d,  $J$  = 7.9 Hz, 2H), 5.62 (ddd,  $J$  = 48.9, 8.8, 2.4 Hz, 1H), 3.77–3.72 (m, 4H), 2.91 (ddd,  $J$  = 17.1, 14.2, 8.8 Hz, 1H), 2.68–2.53 (m, 5H), 2.36 (s, 3H).

<sup>13</sup>C NMR (125 MHz, CDCl<sub>3</sub>) δ 138.3, 135.7 (d,  $J_{C-F}$  = 20.0 Hz), 129.1, 125.6, 92.6 (d,  $J_{C-F}$  = 173.0 Hz), 66.9, 64.9 (d,  $J_{C-F}$  = 23.4 Hz), 54.1, 21.1.

<sup>19</sup>F NMR (471 MHz, CDCl<sub>3</sub>) δ -175.11.

FTIR (thin film): cm<sup>-1</sup> 2955, 2854, 2808, 1453, 1138, 1115, 1008, 869, 816, 536.

HRMS (ESI)  $m/z$ : [M+H]<sup>+</sup> Calcd for C<sub>13</sub>H<sub>19</sub>FNO<sup>+</sup> 224.1445; found: 224.1451.

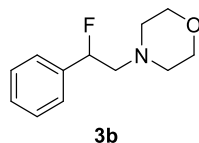

**4-(2-Fluoro-2-phenylethyl)morpholine (3b).** Synthesized using GP3 from **1b** and *O*-benzoylhydroxylmorpholine **2a**. Isolated by flash column chromatography (10% ethyl acetate–hexanes to 30% ethyl acetate–hexanes), as a pale oil (27.2 mg, 65%).

$R_f$  = 0.12 (30% ethyl acetate–hexanes).

<sup>1</sup>H NMR (500 MHz, CDCl<sub>3</sub>) δ 7.40–7.22 (m, 5H), 5.60 (ddd,  $J$  = 48.9, 8.8, 2.3 Hz, 1H), 3.69 (t,  $J$  = 4.7 Hz, 4H), 2.98–2.72 (m, 1H), 2.67–2.58 (m, 1H), 2.58–2.41 (m, 4H).

<sup>13</sup>C NMR (125 MHz, CDCl<sub>3</sub>) δ 138.7 (d,  $J_{C-F}$  = 20.6 Hz), 128.5, 128.5, 125.6 (d,  $J_{C-F}$  = 6.9 Hz), 92.6 (d,  $J_{C-F}$  = 173.7 Hz), 66.9, 64.9 (d,  $J_{C-F}$  = 23.1 Hz), 54.1.

<sup>19</sup>F NMR (471 MHz, CDCl<sub>3</sub>) δ -176.90.

**FTIR** (thin film):  $\text{cm}^{-1}$  2956, 2854, 2809, 1495, 1452, 1115, 1008, 914, 727, 698.

**HRMS** (ESI)  $m/z$ :  $[\text{M}+\text{H}]^+$  Calcd for  $\text{C}_{12}\text{H}_{17}\text{FNO}^+$  210.1289; found: 210.1291.

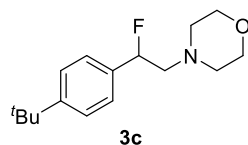

**4-(2-(4-(*tert*-Butyl)phenyl)-2-fluoroethyl)morpholine (3c).** Synthesized using **GP3** from **1c** and *O*-benzoylhydroxymorpholine **2a**. Isolated by flash column chromatography (10% ethyl acetate–hexanes to 30% ethyl acetate–hexanes), as a pale-yellow oil (39.2 mg, 74%).

$R_f$  = 0.20 (30% ethyl acetate–hexanes).

$^1\text{H NMR}$  (500 MHz,  $\text{CDCl}_3$ )  $\delta$  7.33 (d,  $J$  = 8.2 Hz, 2H), 7.20 (d,  $J$  = 8.2 Hz, 2H), 5.58 (ddd,  $J$  = 49.1, 9.0, 2.1 Hz, 1H), 3.69 (t,  $J$  = 4.7 Hz, 4H), 2.95–2.76 (m, 1H), 2.67–2.58 (m, 1H), 2.58–2.43 (m, 4H), 1.24 (s, 9H).

$^{13}\text{C NMR}$  (125 MHz,  $\text{CDCl}_3$ )  $\delta$  151.6, 135.6 (d,  $J_{\text{C-F}}$  = 20.1 Hz), 125.4, 125.3 (d,  $J_{\text{C-F}}$  = 6.5 Hz), 92.5 (d,  $J_{\text{C-F}}$  = 172.8 Hz), 66.9, 64.8 (d,  $J_{\text{C-F}}$  = 23.1 Hz), 54.0, 34.6, 31.3.

$^{19}\text{F NMR}$  (471 MHz,  $\text{CDCl}_3$ )  $\delta$  -175.11.

**FTIR** (thin film):  $\text{cm}^{-1}$  2960, 2858, 2809, 1453, 1269, 1117, 1009, 870, 835, 71.

**HRMS** (ESI)  $m/z$ :  $[\text{M}+\text{H}]^+$  Calcd for  $\text{C}_{16}\text{H}_{25}\text{FNO}^+$  266.1915; found: 266.1914.

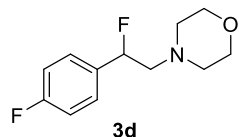

**4-(2-Fluoro-2-(4-fluorophenyl)ethyl)morpholine (3d).** Synthesized using **GP3** from **1d** and *O*-benzoylhydroxymorpholine **2a**. Isolated by flash column chromatography (10% ethyl acetate–hexanes to 30% ethyl acetate–hexanes), as a pale oil (29.1 mg, 63%).

$R_f$  = 0.10 (30% ethyl acetate–hexanes).

$^1\text{H NMR}$  (500 MHz,  $\text{CDCl}_3$ )  $\delta$  7.32 (dd,  $J$  = 8.0, 5.6 Hz, 2H), 7.08–7.03 (m, 2H), 5.62 (ddd,  $J$  = 48.5, 8.6, 2.8 Hz, 1H), 3.79–3.66 (m, 4H), 2.89 (ddd,  $J$  = 17.3, 14.2, 8.6 Hz, 1H), 2.67–2.54 (m, 5H).

$^{13}\text{C NMR}$  (125 MHz,  $\text{CDCl}_3$ )  $\delta$  162.7 (dd,  $J_{\text{C-F}}$  = 247.0, 2.1 Hz), 134.6 (dd,  $J_{\text{C-F}}$  = 20.6, 3.2 Hz), 127.4 (dd,  $J_{\text{C-F}}$  = 8.1, 6.9 Hz), 115.4 (d,  $J_{\text{C-F}}$  = 21.6 Hz), 92.1 (d,  $J_{\text{C-F}}$  = 173.8 Hz), 66.9, 64.8 (d,  $J_{\text{C-F}}$  = 23.4 Hz), 54.1.

$^{19}\text{F NMR}$  (471 MHz,  $\text{CDCl}_3$ )  $\delta$  -113.32, -175.06.

**FTIR** (thin film):  $\text{cm}^{-1}$  2957, 2855, 2810, 1605, 1511, 1454, 1222, 1115, 1009, 834, 539.

**HRMS** (ESI)  $m/z$ :  $[\text{M}+\text{H}]^+$  Calcd for  $\text{C}_{12}\text{H}_{16}\text{F}_2\text{NO}^+$  228.1195; found: 228.1201.

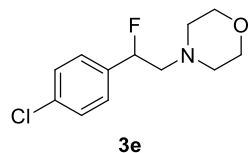

**4-(2-(4-Chlorophenyl)-2-fluoroethyl)morpholine (3e).** Synthesized using **GP3** from **1e** and *O*-benzoylhydroxymorpholine **2a**. Isolated by flash column chromatography (10% ethyl acetate–hexanes to 30% ethyl acetate–hexanes), as a pale oil (22.9 mg, 47%).

$R_f$  = 0.12 (30% ethyl acetate–hexanes).

$^1\text{H NMR}$  (500 MHz,  $\text{CDCl}_3$ )  $\delta$  7.20 (d,  $J$  = 8.4 Hz, 2H), 7.13 (d,  $J$  = 8.4 Hz, 2H), 5.47 (ddd,  $J$  = 48.5, 8.5,

2.6 Hz, 1H), 3.56–3.61 (t,  $J = 4.5$  Hz, 4H), 2.72 (ddd,  $J = 17.6, 14.2, 8.5$  Hz, 1H), 2.61–2.31 (m, 5H).  
 $^{13}\text{C}$  NMR (125 MHz,  $\text{CDCl}_3$ )  $\delta$  137.2 (d,  $J_{\text{C-F}} = 20.4$  Hz), 134.3, 128.7, 126.9, 92.0 (d,  $J_{\text{C-F}} = 174.4$  Hz), 66.9, 64.7 (d,  $J_{\text{C-F}} = 23.3$  Hz), 54.1.  
 $^{19}\text{F}$  NMR (471 MHz,  $\text{CDCl}_3$ )  $\delta$  -177.29.  
FTIR (thin film):  $\text{cm}^{-1}$  2956, 2854, 2809, 1493, 1453, 1115, 1091, 1010, 880, 824, 719, 537.  
HRMS (ESI)  $m/z$ :  $[\text{M}+\text{H}]^+$  Calcd for  $\text{C}_{12}\text{H}_{16}\text{ClFNO}^+$  244.0899; found: 244.0906.

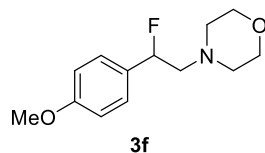

**4-(2-Fluoro-2-(4-methoxyphenyl)ethyl)morpholine (3f).** Synthesized using **GP3** from **1f** and *O*-benzoylhydroxymorpholine **2a**. Isolated by flash column chromatography (10% ethyl acetate–hexanes to 30% ethyl acetate–hexanes), as a yellow oil (38.0 mg, 79%).  
 $R_f = 0.10$  (30% ethyl acetate–hexanes).  
 $^1\text{H}$  NMR (500 MHz,  $\text{CDCl}_3$ )  $\delta$  7.27 (d,  $J = 8.4$  Hz, 2H), 6.90 (d,  $J = 8.4$  Hz, 2H), 5.60 (ddd,  $J = 48.7, 8.8, 2.7$  Hz, 1H), 3.81 (s, 3H), 3.72–3.76 (t,  $J = 4.5$  Hz, 4H), 2.92 (ddd,  $J = 16.7, 14.1, 8.8$  Hz, 1H), 2.73–2.46 (m, 5H).  
 $^{13}\text{C}$  NMR (125 MHz,  $\text{CDCl}_3$ )  $\delta$  159.8, 130.8 (d,  $J_{\text{C-F}} = 20.3$  Hz), 127.1 (d,  $J_{\text{C-F}} = 6.2$  Hz), 113.9, 92.4 (d,  $J = 172.3$  Hz), 66.9, 64.7 (d,  $J_{\text{C-F}} = 24.0$  Hz), 55.3, 54.1.  
 $^{19}\text{F}$  NMR (471 MHz,  $\text{CDCl}_3$ )  $\delta$  -172.14.  
FTIR (thin film):  $\text{cm}^{-1}$  2956, 2853, 2810, 1613, 1515, 1248, 1116, 1033, 832.  
HRMS (ESI)  $m/z$ :  $[\text{M}+\text{H}]^+$  Calcd for  $\text{C}_{13}\text{H}_{19}\text{FNO}_2^+$  240.1394; found: 240.1400.

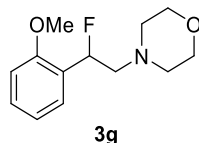

**4-(2-Fluoro-2-(2-methoxyphenyl)ethyl)morpholine (3g).** Synthesized using **GP3** from **1g** and *O*-benzoylhydroxymorpholine **2a**. Isolated by flash column chromatography (10% ethyl acetate–hexanes to 30% ethyl acetate–hexanes), as a yellow oil (26.3 mg, 55%).  
 $R_f = 0.12$  (30% ethyl acetate–hexanes).  
 $^1\text{H}$  NMR (500 MHz,  $\text{CDCl}_3$ )  $\delta$  7.41 (d,  $J = 7.5$  Hz, 1H), 7.34–7.27 (m, 1H), 7.02–6.97 (m, 1H), 6.87 (d,  $J = 8.0$  Hz, 1H), 6.04 (ddd,  $J = 49.1, 8.8, 1.8$  Hz, 1H), 3.83 (s, 3H), 3.76 (t,  $J = 4.6$  Hz, 4H), 2.80 (ddd,  $J = 19.3, 14.2, 8.8$  Hz, 1H), 2.72–2.55 (m, 5H).  
 $^{13}\text{C}$  NMR (125 MHz,  $\text{CDCl}_3$ )  $\delta$  155.3 (d,  $J_{\text{C-F}} = 5.6$  Hz), 129.2 (d,  $J_{\text{C-F}} = 1.4$  Hz), 127.3, 125.9 (d,  $J_{\text{C-F}} = 9.6$  Hz), 120.6, 110.2, 87.9 (d,  $J_{\text{C-F}} = 171.9$  Hz), 67.0 (2C), 63.8 (d,  $J_{\text{C-F}} = 22.5$  Hz), 55.3, 54.0.  
 $^{19}\text{F}$  NMR (471 MHz,  $\text{CDCl}_3$ )  $\delta$  -185.00.  
FTIR (thin film):  $\text{cm}^{-1}$  2955, 2853, 1601, 1586, 1490, 1454, 1288, 1267, 1116, 1034, 869, 783, 698.  
HRMS (ESI)  $m/z$ :  $[\text{M}+\text{H}]^+$  Calcd for  $\text{C}_{13}\text{H}_{19}\text{FNO}_2^+$  240.1394; found: 240.1400.

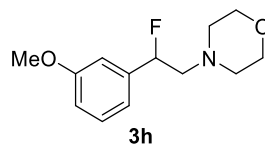

**4-(2-Fluoro-2-(3-methoxyphenyl)ethyl)morpholine (3h).** Synthesized using **GP3** from **1h** and *O*-

benzoylhydroxylmorpholine **2a**. Isolated by flash column chromatography (10% ethyl acetate–hexanes to 30% ethyl acetate–hexanes), as a pale oil (28.6 mg, 60%).

$R_f$  = 0.10 (30% ethyl acetate–hexanes).

$^1\text{H NMR}$  (500 MHz,  $\text{CDCl}_3$ )  $\delta$  7.31–7.26 (m, 1H), 6.92–6.84 (m, 3H), 5.63 (ddd,  $J$  = 49.0, 8.8, 2.5 Hz, 1H), 3.82 (s, 3H), 3.77–3.73 (m, 4H), 2.90 (ddd,  $J$  = 17.6, 14.3, 8.8 Hz, 1H), 2.72–2.53 (m, 5H).

$^{13}\text{C NMR}$  (125 MHz,  $\text{CDCl}_3$ )  $\delta$  159.7, 140.3 (d,  $J_{\text{C-F}}$  = 20.0 Hz), 129.6, 117.7, 113.9 (d,  $J_{\text{C-F}}$  = 1.4 Hz), 111.1 (d,  $J_{\text{C-F}}$  = 7.5 Hz), 92.5 (d,  $J_{\text{C-F}}$  = 174.4 Hz), 66.9, 64.9 (d,  $J_{\text{C-F}}$  = 22.9 Hz), 55.2, 54.1.

$^{19}\text{F NMR}$  (471 MHz,  $\text{CDCl}_3$ )  $\delta$  -177.08.

**FTIR** (thin film):  $\text{cm}^{-1}$  2956, 2853, 2807, 1603, 1493, 1241, 1116, 1031, 754.

**HRMS** (ESI)  $m/z$ :  $[\text{M}+\text{H}]^+$  Calcd for  $\text{C}_{13}\text{H}_{19}\text{FNO}_2^+$  240.1394; found: 240.1401.

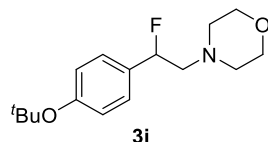

**4-(2-(4-(tert-Butoxy)phenyl)-2-fluoroethyl)morpholine (3i)**. Synthesized using **GP3** from **1i** and *O*-benzoylhydroxylmorpholine **2a**. Isolated by flash column chromatography (10% ethyl acetate–hexanes to 30% ethyl acetate–hexanes), as a yellow oil (40.0 mg, 71%).

$R_f$  = 0.13 (30% ethyl acetate–hexanes).

$^1\text{H NMR}$  (500 MHz,  $\text{CDCl}_3$ )  $\delta$  7.24 (d,  $J$  = 8.4 Hz, 2H), 6.99 (d,  $J$  = 8.4 Hz, 2H), 5.61 (ddd,  $J$  = 48.8, 8.9, 2.5 Hz, 1H), 3.77–3.70 (m, 4H), 2.92 (ddd,  $J$  = 17.0, 14.2, 8.9 Hz, 1H), 2.70–2.53 (m, 5H), 1.35 (s, 9H).

$^{13}\text{C NMR}$  (125 MHz,  $\text{CDCl}_3$ )  $\delta$  155.7 (d,  $J_{\text{C-F}}$  = 2.1 Hz), 133.4 (d,  $J_{\text{C-F}}$  = 20.2 Hz), 126.4 (d,  $J_{\text{C-F}}$  = 6.4 Hz, 2C), 124.0, 92.5 (d,  $J_{\text{C-F}}$  = 172.6 Hz), 78.7, 67.0, 64.8 (d,  $J_{\text{C-F}}$  = 23.5 Hz), 54.1, 28.8.

$^{19}\text{F NMR}$  (471 MHz,  $\text{CDCl}_3$ )  $\delta$  -173.54.

**FTIR** (thin film):  $\text{cm}^{-1}$  2974, 2854, 2808, 1719, 1508, 1365, 1236, 1160, 1116, 895, 853, 549.

**HRMS** (ESI)  $m/z$ :  $[\text{M}+\text{H}]^+$  Calcd for  $\text{C}_{16}\text{H}_{25}\text{FNO}_2^+$  282.1864; found: 282.1869.

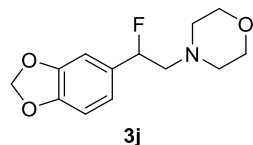

**4-(2-(Benzo[*d*][1,3]dioxol-5-yl)-2-fluoroethyl)morpholine (3j)**. Synthesized using **GP3** from **1j** and *O*-benzoylhydroxylmorpholine **2a**. Isolated by flash column chromatography (20% ethyl acetate–hexanes to 50% ethyl acetate–hexanes), as a pale-yellow oil (35.8 mg, 71%).

$R_f$  = 0.14 (30% ethyl acetate–hexanes).

$^1\text{H NMR}$  (500 MHz,  $\text{CDCl}_3$ )  $\delta$  6.78 (s, 1H), 6.73 (d,  $J$  = 0.7 Hz, 2H), 5.90 (s, 2H), 5.48 (ddd,  $J$  = 48.5, 8.7, 2.6 Hz, 1H), 3.72–3.56 (m, 4H), 2.89–2.72 (m, 1H), 2.61–2.58 (m, 1H), 2.58–2.42 (m, 4H).

$^{13}\text{C NMR}$  (125 MHz,  $\text{CDCl}_3$ )  $\delta$  147.9, 132.6 (d,  $J_{\text{C-F}}$  = 20.4 Hz), 119.5 (d,  $J_{\text{C-F}}$  = 7.3 Hz), 108.2, 106.3 (d,  $J_{\text{C-F}}$  = 6.5 Hz), 101.2, 92.5 (d,  $J_{\text{C-F}}$  = 173.7 Hz), 66.9, 64.8 (d,  $J_{\text{C-F}}$  = 24.0 Hz), 54.1.

$^{19}\text{F NMR}$  (471 MHz,  $\text{CDCl}_3$ )  $\delta$  -171.98.

**FTIR** (thin film):  $\text{cm}^{-1}$  2894, 2855, 2812, 1717, 1490, 1444, 1247, 1115, 1036, 931, 870, 716.

**HRMS** (ESI)  $m/z$ :  $[\text{M}+\text{H}]^+$  Calcd for  $\text{C}_{13}\text{H}_{17}\text{FNO}_3^+$  254.1187; found: 254.1189.

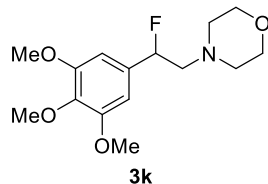

**4-(2-Fluoro-2-(3,4,5-trimethoxyphenyl)ethyl)morpholine (3k).** Synthesized using **GP3** from **1k** and *O*-benzoylhydroxymorpholine **2a**. IPrCuCl (5 mol %) was used instead of the Cu(HFacac)<sub>2</sub>. Isolated by flash column chromatography (25% ethyl acetate–hexanes to 50% ethyl acetate–hexanes), as a pale-yellow oil (27.0 mg, 45%).

$R_f$  = 0.20 (50% ethyl acetate–hexanes).

<sup>1</sup>H NMR (500 MHz, CDCl<sub>3</sub>) δ 6.56 (s, 2H), 5.59 (ddd,  $J$  = 48.7, 8.6, 2.2 Hz, 1H), 3.87 (s, 6H), 3.84 (s, 3H), 3.78–3.72 (m, 4H), 2.98–2.81 (m, 1H), 2.73–2.65 (m, 1H), 2.65–2.50 (m, 4H).

<sup>13</sup>C NMR (125 MHz, CDCl<sub>3</sub>) δ 153.4, 138.0, 134.4 (d,  $J_{C-F}$  = 20.4 Hz), 102.6 (d,  $J_{C-F}$  = 7.2 Hz), 92.9 (d,  $J_{C-F}$  = 174.5 Hz), 66.9, 64.9 (d,  $J_{C-F}$  = 23.2 Hz), 60.9, 56.2, 54.1.

<sup>19</sup>F NMR (471 MHz, CDCl<sub>3</sub>) δ -174.42.

FTIR (thin film): cm<sup>-1</sup> 2939, 2841, 1591, 1454, 1236, 1117, 1007, 870, 705.

HRMS (ESI)  $m/z$ : [M+H]<sup>+</sup> Calcd for C<sub>15</sub>H<sub>23</sub>FNO<sub>4</sub><sup>+</sup> 300.1606; found: 300.1600.

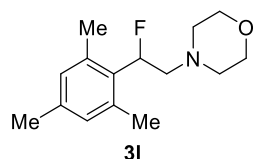

**4-(2-Fluoro-2-mesitylethyl)morpholine (3l).** Synthesized using **GP3** from **1l** and *O*-benzoylhydroxymorpholine **2a**. Isolated by flash column chromatography (10% ethyl acetate–hexanes to 20% ethyl acetate–hexanes), as a pale oil (25.6 mg, 51%).

$R_f$  = 0.14 (30% ethyl acetate–hexanes).

<sup>1</sup>H NMR (500 MHz, CDCl<sub>3</sub>) δ 6.83 (s, 2H), 6.03 (ddd,  $J$  = 48.4, 9.3, 2.7 Hz, 1H), 3.78–3.74 (m, 4H), 3.15 (td,  $J$  = 14.4, 9.3 Hz, 1H), 2.67–2.57 (m, 4H), 2.50 (ddd,  $J$  = 33.1, 14.4, 2.7 Hz, 1H), 2.38–2.34 (m, 6H), 2.26 (s, 3H).

<sup>13</sup>C NMR (125 MHz, CDCl<sub>3</sub>) δ 137.7, 135.7 (d,  $J_{C-F}$  = 3.6 Hz), 131.4 (d,  $J_{C-F}$  = 17.8 Hz), 129.9, 90.7 (d,  $J_{C-F}$  = 172.9 Hz), 66.9, 62.2 (d,  $J_{C-F}$  = 22.7 Hz), 54.1, 20.8, 20.4, 20.4.

<sup>19</sup>F NMR (471 MHz, CDCl<sub>3</sub>) δ -181.57.

FTIR (thin film): cm<sup>-1</sup> 2959, 2854, 2809, 1678, 1612, 1452, 1142, 1116, 1050, 1007, 871, 852, 731, 572.

HRMS (ESI)  $m/z$ : [M+H]<sup>+</sup> Calcd for C<sub>15</sub>H<sub>23</sub>FNO<sup>+</sup> 252.1758; found: 252.1765.

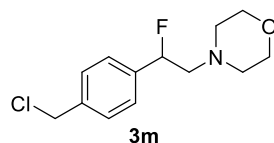

**4-(2-(4-(Chloromethyl)phenyl)-2-fluoroethyl)morpholine (3m).** Synthesized using **GP3** from **1m** and *O*-benzoylhydroxymorpholine **2a**. Isolated by flash column chromatography (10% ethyl acetate–hexanes to 30% ethyl acetate–hexanes), as a yellow oil (26.8 mg, 52%).

$R_f$  = 0.16 (30% ethyl acetate–hexanes).

<sup>1</sup>H NMR (500 MHz, CDCl<sub>3</sub>) δ 7.40 (d,  $J$  = 8.0 Hz, 2H), 7.34 (d,  $J$  = 8.0 Hz, 2H), 5.67 (ddd,  $J$  = 48.7, 8.7, 2.6 Hz, 1H), 4.58 (s, 2H), 3.76–3.74 (m, 4H), 2.89 (ddd,  $J$  = 17.4, 14.2, 8.7 Hz, 1H), 2.76–2.54 (m, 5H).

<sup>13</sup>C NMR (125 MHz, CDCl<sub>3</sub>) δ 138.9 (d,  $J_{C-F}$  = 20.1 Hz), 137.7, 128.7, 125.9 (d,  $J_{C-F}$  = 7.0 Hz), 92.2 (d,

$J_{C-F} = 174.3$  Hz), 66.8, 64.8 (d,  $J_{C-F} = 23.0$  Hz), 54.0, 45.7.

$^{19}\text{F}$  NMR (471 MHz,  $\text{CDCl}_3$ )  $\delta$  -177.64.

**FTIR** (thin film):  $\text{cm}^{-1}$  2984, 2843, 2801, 1493, 1350, 1123, 1056, 968, 867, 813, 727.

**HRMS** (ESI)  $m/z$ :  $[\text{M}+\text{H}]^+$  Calcd for  $\text{C}_{13}\text{H}_{18}\text{ClFNO}^+$  258.1056; found: 258.1061.

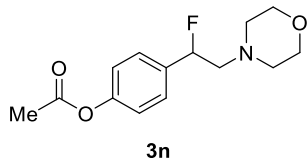

**4-(1-Fluoro-2-morpholinoethyl)phenyl acetate (3n).** Synthesized using **GP3** from **1n** and *O*-benzoylhydroxymorpholine **2a**. Isolated by flash column chromatography (30% ethyl acetate–hexanes to 50% ethyl acetate–hexanes), as a pale oil (27.0 mg, 50%).

$R_f = 0.11$  (30% ethyl acetate–hexanes).

$^1\text{H}$  NMR (500 MHz,  $\text{CDCl}_3$ )  $\delta$  7.36 (d,  $J = 8.4$  Hz, 2H), 7.10 (d,  $J = 8.4$  Hz, 2H), 5.65 (ddd,  $J = 48.6, 8.7, 2.3$  Hz, 1H), 3.76–3.74 (m, 4H), 2.89 (ddd,  $J = 17.4, 14.2, 8.7$  Hz, 1H), 2.72–2.53 (m, 5H), 2.30 (s, 3H).

$^{13}\text{C}$  NMR (125 MHz,  $\text{CDCl}_3$ )  $\delta$  169.4, 150.6, 136.3 (d,  $J_{C-F} = 20.4$  Hz), 126.7, 121.7, 92.2 (d,  $J_{C-F} = 174.2$  Hz), 66.9, 64.8 (d,  $J_{C-F} = 23.1$  Hz), 54.1, 21.1.

$^{19}\text{F}$  NMR (471 MHz,  $\text{CDCl}_3$ )  $\delta$  -176.30.

**FTIR** (thin film):  $\text{cm}^{-1}$  2929, 2854, 1755, 1509, 1369, 1191, 1116, 1009, 911, 882, 869.

**HRMS** (ESI)  $m/z$ :  $[\text{M}+\text{H}]^+$  Calcd for  $\text{C}_{14}\text{H}_{19}\text{FNO}_3^+$  268.1344; found: 268.1350.

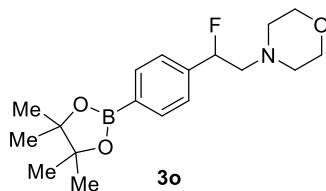

**4-(2-Fluoro-2-(4-(4,4,5,5-tetramethyl-1,3,2-dioxaborolan-2-yl)phenyl)ethyl)morpholine (3o).** Synthesized using **GP3** from **1o** and *O*-benzoylhydroxymorpholine **2a**. Isolated by flash column chromatography (10% ethyl acetate–hexanes to 30% ethyl acetate–hexanes), as a pale-yellow oil (40.2 mg, 60%).

$R_f = 0.20$  (33% ethyl acetate–hexanes).

$^1\text{H}$  NMR (500 MHz,  $\text{CDCl}_3$ )  $\delta$  7.82 (d,  $J = 7.8$  Hz, 2H), 7.34 (d,  $J = 7.8$  Hz, 2H), 5.67 (ddd,  $J = 48.9, 8.6, 2.2$  Hz, 1H), 3.82–3.61 (m, 4H), 3.00–2.83 (m, 1H), 2.72–2.64 (m, 1H), 2.64–2.45 (m, 4H), 1.34 (s, 12H).

$^{13}\text{C}$  NMR (125 MHz,  $\text{CDCl}_3$ )  $\delta$  141.7 (d,  $J_{C-F} = 20.1$  Hz), 134.9, 128.3 (d,  $J_{C-F} = 11.6$  Hz), 124.7 (d,  $J_{C-F} = 7.1$  Hz), 92.5 (d,  $J_{C-F} = 174.5$  Hz), 83.9, 66.9, 64.8 (d,  $J_{C-F} = 22.9$  Hz), 54.0, 24.8.

$^{19}\text{F}$  NMR (471 MHz,  $\text{CDCl}_3$ )  $\delta$  -178.83.

**FTIR** (thin film):  $\text{cm}^{-1}$  2976, 2854, 2808, 1614, 1357, 1142, 1009, 857, 658.

**HRMS** (ESI)  $m/z$ :  $[\text{M}+\text{H}]^+$  Calcd for  $\text{C}_{18}\text{H}_{28}^{[11]\text{B}}\text{FNO}_3^+$  336.2141; found: 336.2140.

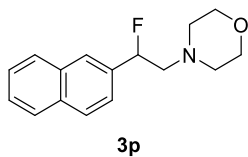

**4-(2-Fluoro-2-(naphthalen-2-yl)ethyl)morpholine (3p).** Synthesized using **GP3** from **1p** and *O*-benzoylhydroxymorpholine **2a**. Isolated by flash column chromatography (10% ethyl acetate–hexanes to

30% ethyl acetate–hexanes), as a pale-yellow oil (32.2 mg, 62%).

$R_f$  = 0.30 (50% ethyl acetate–hexanes).

$^1\text{H NMR}$  (500 MHz,  $\text{CDCl}_3$ )  $\delta$  7.86 (dd,  $J$  = 9.3, 5.1 Hz, 3H), 7.82 (s, 1H), 7.56–7.47 (m, 2H), 7.45 (d,  $J$  = 8.6 Hz, 1H), 5.83 (ddd,  $J$  = 48.8, 8.6, 2.4 Hz, 1H), 3.84–3.66 (m, 4H), 3.14–2.88 (m, 1H), 2.81–2.67 (m, 1H), 2.67–2.55 (m, 4H).

$^{13}\text{C NMR}$  (125 MHz,  $\text{CDCl}_3$ )  $\delta$  136.1 (d,  $J_{\text{C-F}}$  = 19.6 Hz), 133.3, 133.1, 128.4, 128.1, 127.8, 126.5, 126.4, 124.8 (d,  $J_{\text{C-F}}$  = 8.1 Hz), 123.2 (d,  $J_{\text{C-F}}$  = 5.7 Hz), 92.8 (d,  $J_{\text{C-F}}$  = 173.9 Hz), 66.9, 64.9 (d,  $J_{\text{C-F}}$  = 23.1 Hz), 54.1.

$^{19}\text{F NMR}$  (471 MHz,  $\text{CDCl}_3$ )  $\delta$  -176.57.

**FTIR** (thin film):  $\text{cm}^{-1}$  2937, 2865, 2816, 1717, 1274, 1110, 1011, 872, 824, 741.

**HRMS** (ESI)  $m/z$ :  $[\text{M}+\text{H}]^+$  Calcd for  $\text{C}_{16}\text{H}_{19}\text{FNO}^+$  260.1445; found: 260.1439.

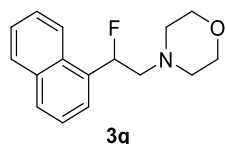

**4-(2-Fluoro-2-(naphthalen-1-yl)ethyl)morpholine (3q).** Synthesized using **GP3** from **1q** and *O*-benzoylhydroxylmorpholine **2a**. IPrCuCl (5 mol %) was used instead of the  $\text{Cu}(\text{HFacac})_2$ . Isolated by flash column chromatography (10% ethyl acetate–hexanes to 40% ethyl acetate–hexanes), as a pale oil (34.4 mg, 66%).

$R_f$  = 0.30 (50% ethyl acetate–hexanes).

$^1\text{H NMR}$  (500 MHz,  $\text{CDCl}_3$ )  $\delta$  7.94 (d,  $J$  = 8.2 Hz, 1H), 7.89 (dd,  $J$  = 8.0, 1.6 Hz, 1H), 7.84 (d,  $J$  = 8.2 Hz, 1H), 7.62 (d,  $J$  = 8.0 Hz, 1H), 7.59–7.47 (m, 3H), 6.42 (ddd,  $J$  = 48.4, 8.7, 2.1 Hz, 1H), 3.82–3.78 (t,  $J$  = 4.5 Hz, 4H), 3.02 (ddd,  $J$  = 19.0, 14.6, 8.7 Hz, 1H), 2.86 (ddd,  $J$  = 36.0, 14.6, 2.1 Hz, 1H), 2.78–2.58 (m, 4H).

$^{13}\text{C NMR}$  (125 MHz,  $\text{CDCl}_3$ )  $\delta$  134.4 (d,  $J_{\text{C-F}}$  = 18.7 Hz), 133.6, 129.6 (d,  $J_{\text{C-F}}$  = 4.1 Hz), 129.0, 128.8 (d,  $J_{\text{C-F}}$  = 1.3 Hz), 126.5, 125.8, 125.3, 123.2 (d,  $J_{\text{C-F}}$  = 11.2 Hz), 122.6, 91.0 (d,  $J_{\text{C-F}}$  = 174.2 Hz), 67.0, 64.6 (d,  $J$  = 22.7 Hz), 54.1.

$^{19}\text{F NMR}$  (471 MHz,  $\text{CDCl}_3$ )  $\delta$  -180.07.

**FTIR** (thin film):  $\text{cm}^{-1}$  3050, 2955, 2853, 2809, 1675, 1452, 1137, 1009, 798, 775.

**HRMS** (ESI)  $m/z$ :  $[\text{M}+\text{H}]^+$  Calcd for  $\text{C}_{16}\text{H}_{19}\text{FNO}^+$  260.1445; found: 260.1449.

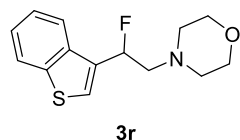

**4-(2-(Benzo[*b*]thiophen-3-yl)-2-fluoroethyl)morpholine (3r).** Synthesized using **GP3** from **1r** and *O*-benzoylhydroxylmorpholine **2a**. IPrCuCl (5 mol %) was used instead of the  $\text{Cu}(\text{HFacac})_2$ . Isolated by flash column chromatography (10% ethyl acetate–hexanes to 30% ethyl acetate–hexanes), as a pale-yellow oil (23.9 mg, 45%).

$R_f$  = 0.25 (50% ethyl acetate–hexanes).

$^1\text{H NMR}$  (500 MHz,  $\text{CDCl}_3$ )  $\delta$  7.88 (d,  $J$  = 7.4 Hz, 1H), 7.83 (d,  $J$  = 7.4 Hz, 1H), 7.50 (s, 1H), 7.45–7.33 (m, 2H), 6.04 (ddd,  $J$  = 48.1, 8.2, 1.7 Hz, 1H), 3.86–3.70 (m, 4H), 3.20–3.00 (m, 1H), 2.98–2.80 (m, 1H), 2.72–2.56 (m, 4H).

$^{13}\text{C NMR}$  (125 MHz,  $\text{CDCl}_3$ )  $\delta$  140.6, 136.7, 133.6 (d,  $J_{\text{C-F}}$  = 21.2 Hz), 124.7, 124.4, 123.9 (d,  $J_{\text{C-F}}$  = 8.5 Hz), 123.0, 121.9, 89.0 (d,  $J_{\text{C-F}}$  = 172.3 Hz), 66.9, 63.2 (d,  $J_{\text{C-F}}$  = 22.9 Hz), 54.2.

$^{19}\text{F NMR}$  (471 MHz,  $\text{CDCl}_3$ )  $\delta$  -175.77.

**FTIR** (thin film):  $\text{cm}^{-1}$  2923, 2854, 1597, 1447, 1371, 1175, 1118, 977, 748, 576.



**HRMS** (ESI)  $m/z$ :  $[M+H]^+$  Calcd for  $C_{14}H_{17}FNOS^+$  266.1009; found: 266.1010.

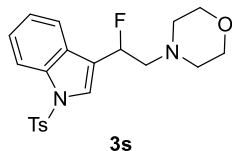

**4-(2-Fluoro-2-(1-tosyl-1H-indol-3-yl)ethyl)morpholine (3s)**. Synthesized using **GP3** from **1s** and *O*-benzoylhydroxylmorpholine **2a**. Isolated by flash column chromatography (20% ethyl acetate–hexanes to 40% ethyl acetate–hexanes), as a pale-yellow oil (26.2 mg, 33%).

$R_f$  = 0.20 (50% ethyl acetate–hexanes).

**$^1H$  NMR** (500 MHz,  $CDCl_3$ )  $\delta$  7.98 (d,  $J$  = 8.3 Hz, 1H), 7.78 (d,  $J$  = 8.3 Hz, 2H), 7.63 (d,  $J$  = 2.4 Hz, 1H), 7.60 (d,  $J$  = 7.6 Hz, 1H), 7.34 (t,  $J$  = 7.6 Hz, 1H), 7.27–7.21 (m, 3H), 5.91 (dd,  $J$  = 48.4, 6.6 Hz, 1H), 5.91 (dd,  $J$  = 48.4, 6.6 Hz, 1H), 3.75 (t,  $J$  = 4.5 Hz, 5H), 3.09 (ddd,  $J$  = 17.9, 14.2, 8.2 Hz, 1H), 2.86 (dd,  $J$  = 30.2, 14.2 Hz, 1H), 2.74–2.49 (m, 4H), 2.35 (s, 3H).

**$^{13}C$  NMR** (125 MHz,  $CDCl_3$ )  $\delta$  145.3, 135.2, 135.1, 130.0, 128.4, 128.3, 126.9, 125.2, 123.7 (d,  $J_{C-F}$  = 9.2 Hz), 123.5, 120.1, 113.8, 87.2 (d,  $J_{C-F}$  = 169.6 Hz), 66.9, 62.8 (d,  $J_{C-F}$  = 22.9 Hz), 54.1, 21.6.

**$^{19}F$  NMR** (471 MHz,  $CDCl_3$ )  $\delta$  -175.43.

**FTIR** (thin film):  $cm^{-1}$  2924, 2853, 2811, 1673, 1138, 1428, 1115, 1008, 866, 760, 733.

**HRMS** (ESI)  $m/z$ :  $[M+H]^+$  Calcd for  $C_{21}H_{24}FN_2O_3S^+$  403.1486; found: 403.1489.

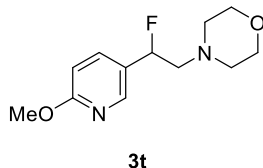

**4-(2-Fluoro-2-(6-methoxypyridin-3-yl)ethyl)morpholine (3t)**. Synthesized using **GP3** from **1t** and *O*-benzoylhydroxylmorpholine **2a**. Isolated by flash column chromatography (10% ethyl acetate–hexanes to 30% ethyl acetate–hexanes), as a pale-yellow oil (31.7 mg, 66%).

$R_f$  = 0.14 (30% ethyl acetate–hexanes).

**$^1H$  NMR** (500 MHz,  $CDCl_3$ )  $\delta$  8.14 (s, 1H), 7.59 (dd,  $J$  = 8.6, 2.1 Hz, 1H), 6.76 (d,  $J$  = 8.6 Hz, 1H), 5.61 (ddd,  $J$  = 48.0, 8.3, 3.0 Hz, 1H), 3.94 (s, 3H), 3.73 (t,  $J$  = 4.7 Hz, 4H), 2.93 (ddd,  $J$  = 17.1, 14.1, 8.3 Hz, 1H), 2.74–2.46 (m, 1H), 2.74–2.46 (m, 4H).

**$^{13}C$  NMR** (125 MHz,  $CDCl_3$ )  $\delta$  164.5 (d,  $J_{C-F}$  = 1.4 Hz), 144.9 (d,  $J_{C-F}$  = 7.3 Hz), 136.4 (d,  $J_{C-F}$  = 5.0 Hz), 127.0 (d,  $J_{C-F}$  = 20.8 Hz), 111.0, 90.6 (d,  $J_{C-F}$  = 172.7 Hz), 66.9, 64.1 (d,  $J_{C-F}$  = 24.0 Hz), 54.1, 53.6.

**$^{19}F$  NMR** (471 MHz,  $CDCl_3$ )  $\delta$  -174.28.

**FTIR** (thin film):  $cm^{-1}$  2948, 2853, 1609, 1495, 1392, 1286, 1116, 1022, 869, 832.

**HRMS** (ESI)  $m/z$ :  $[M+H]^+$  Calcd for  $C_{12}H_{18}FN_2O_2^+$  241.1347; found: 241.1342.

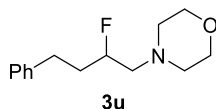

**4-(2-Fluoro-4-phenylbutyl)morpholine (3u)**. Synthesized using **GP3** from **1u** and *O*-benzoylhydroxylmorpholine **2a**.  $IPrCuCl$  (5 mol %) was used instead of the  $Cu(HFacac)_2$ . Isolated by flash column chromatography (20% ethyl acetate–hexanes to 50% ethyl acetate–hexanes), as a pale oil (5.5 mg, 12%).

$R_f$  = 0.10 (50% ethyl acetate–hexanes).

**<sup>1</sup>H NMR** (500 MHz, CDCl<sub>3</sub>) δ 7.32–7.27 (m, 2H), 7.23–7.18 (m, 3H), 4.81–4.52 (m, 1H), 3.75–3.58 (m, 4H), 2.88–2.78 (m, 1H), 2.75–2.68 (m, 1H), 2.68–2.58 (m, 1H), 2.55–2.41 (m, 5H), 2.07–1.95 (m, 1H), 1.95–1.78 (m, 1H).

**<sup>13</sup>C NMR** (125 MHz, CDCl<sub>3</sub>) δ 141.2, 128.5, 128.8, 126.1, 91.5 (d,  $J_{C-F}$  = 170.0 Hz), 66.9, 62.8 (d,  $J_{C-F}$  = 20.5 Hz), 54.3, 35.2 (d,  $J_{C-F}$  = 20.8 Hz), 31.2 (d,  $J_{C-F}$  = 4.6 Hz).

**<sup>19</sup>F NMR** (471 MHz, CDCl<sub>3</sub>) δ -182.13.

**FTIR** (thin film): cm<sup>-1</sup> 2952, 2853, 1717, 1453, 1273, 1116, 1035, 867, 699.

**HRMS** (ESI) m/z: [M+H]<sup>+</sup> Calcd for C<sub>14</sub>H<sub>21</sub>FNO<sup>+</sup> 238.1602; found: 238.1600.

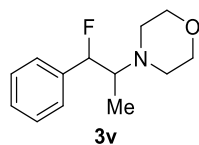

**4-(1-Fluoro-1-phenylpropan-2-yl)morpholine (3v).** Synthesized using **GP3** from (*E*)-**1v** and *O*-benzoylhydroxylmorpholine **2a**. <sup>1</sup>H-NMR analysis of the crude reaction mixture indicated a diastereomeric ratio (dr) of 2.5:1. Isolated as a mixture of two diastereomers by flash column chromatography (10% ethyl acetate–hexanes to 30% ethyl acetate–hexanes), as a pale-yellow oil (32.2 mg, 60%).

Synthesized using **GP3** from (*Z*)-**1v** and *O*-benzoylhydroxylmorpholine **2a**. <sup>1</sup>H-NMR analysis of the crude reaction mixture indicated a diastereomeric ratio (dr) of 1.8:1. Isolated as a mixture of two diastereomers by flash column chromatography (10% ethyl acetate–hexanes to 30% ethyl acetate–hexanes), as a pale-yellow oil (25.0 mg, 56%).

$R_f$  = 0.20 (33% ethyl acetate–hexanes).

**Major isomer (3v-I):** <sup>1</sup>H NMR (500 MHz, CDCl<sub>3</sub>) δ 7.45–7.29 (m, 5H), 5.36 (dd,  $J$  = 47.9, 8.3 Hz, 1H), 3.72 (t,  $J$  = 4.0 Hz, 4H), 3.13–2.92 (m, 1H), 2.80–2.58 (m, 4H), 0.84 (d,  $J$  = 6.9 Hz, 3H).

**<sup>13</sup>C NMR** (125 MHz, CDCl<sub>3</sub>) δ 138.5 (d,  $J$  = 20.1 Hz), 128.5 (d,  $J$  = 2.0 Hz), 128.3, 126.7 (d,  $J$  = 6.4 Hz), 95.8 (d,  $J$  = 176.5 Hz), 67.6, 63.5 (d,  $J$  = 21.8 Hz), 49.6, 11.2 (d,  $J$  = 6.2 Hz).

**<sup>19</sup>F NMR** (471 MHz, CDCl<sub>3</sub>) δ -175.16.

**FTIR** (thin film): cm<sup>-1</sup> 2955, 2851, 1720, 1451, 1267, 1114, 999, 751, 699.

**HRMS** (ESI) m/z: [M+H]<sup>+</sup> Calcd for C<sub>13</sub>H<sub>19</sub>FNO<sup>+</sup> 224.1445; found: 224.1447.

The relative stereochemistry of major isomer **3v-I** has been determined by X-ray analysis. More information of the X-ray analysis is provided on S283.

**Minor isomer (3v-II):** <sup>1</sup>H NMR (500 MHz, CDCl<sub>3</sub>) δ 7.39–7.34 (m, 2H), 7.30 (3,  $J$  = 6.6 Hz, 3H), 5.72 (dd,  $J$  = 48.1, 2.2 Hz, 1H), 3.71 (t,  $J$  = 4.5 Hz, 4H), 2.83 (dq,  $J$  = 13.4, 6.8, 2.2 Hz, 1H), 2.73–2.57 (m, 4H), 1.04 (dd,  $J$  = 6.8, 1.1 Hz, 3H).

**<sup>13</sup>C NMR** (125 MHz, CDCl<sub>3</sub>) δ 139.5 (d,  $J$  = 20.7 Hz), 128.2, 127.7, 125.1 (d,  $J$  = 8.5 Hz), 94.7 (d,  $J$  = 178.7 Hz), 67.5, 64.9 (d,  $J$  = 22.0 Hz), 49.9, 7.6 (d,  $J$  = 6.7 Hz).

**<sup>19</sup>F NMR** (471 MHz, CDCl<sub>3</sub>) δ -193.68.

**FTIR** (thin film): cm<sup>-1</sup> 2924, 2853, 1669, 1450, 1254, 1199, 1117, 955, 984, 720, 699.

**HRMS** (ESI) m/z: [M+H]<sup>+</sup> Calcd for C<sub>13</sub>H<sub>19</sub>FNO<sup>+</sup> 224.1445; found: 224.1448.

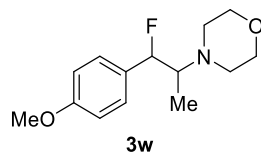

**4-(1-Fluoro-1-(4-methoxyphenyl)propan-2-yl)morpholine (3w).** Synthesized using **GP3** from **1w** and *O*-benzoylhydroxylmorpholine **2a**. <sup>1</sup>H-NMR analysis of the crude reaction mixture indicated a diastereomeric ratio (dr) of 1.8:1. Isolated by flash column chromatography (10% ethyl acetate–hexanes to 15% ethyl acetate–hexanes), as a pale-yellow oil (26.8 mg, 53%).

**Minor isomer (3w-I):** *R<sub>f</sub>* = 0.40 (33% ethyl acetate–hexanes).

<sup>1</sup>H NMR (500 MHz, CDCl<sub>3</sub>) δ 7.26 (d, *J* = 8.5 Hz, 2H), 6.90 (d, *J* = 8.5 Hz, 2H), 5.30 (dd, *J* = 47.3, 8.1 Hz, 1H), 3.82 (s, 3H), 3.73 (t, *J* = 4.4 Hz, 3H), 3.09–2.98 (m, 1H), 2.78–2.64 (m, 4H), 0.82 (d, *J* = 6.9 Hz, 3H).

<sup>13</sup>C NMR (125 MHz, CDCl<sub>3</sub>) δ 159.8 (d, *J<sub>C-F</sub>* = 1.8 Hz), 130.6 (d, *J<sub>C-F</sub>* = 20.7 Hz), 128.1 (d, *J<sub>C-F</sub>* = 5.7 Hz), 113.8, 95.4 (d, *J<sub>C-F</sub>* = 175.9 Hz), 67.5, 63.5 (d, *J<sub>C-F</sub>* = 22.1 Hz), 55.3, 49.6, 11.3 (d, *J<sub>C-F</sub>* = 5.8 Hz).

<sup>19</sup>F NMR (471 MHz, CDCl<sub>3</sub>) δ -170.96.

**FTIR** (thin film): cm<sup>-1</sup> 2933, 2851, 1613, 1514, 1249, 1115, 1033, 996, 831.

**HRMS** (ESI) *m/z*: [M+H]<sup>+</sup> Calcd for C<sub>14</sub>H<sub>21</sub>FNO<sub>2</sub><sup>+</sup> 254.1551; found: 254.1545.

**Major isomer (3w-II):** *R<sub>f</sub>* = 0.35 (33% ethyl acetate–hexanes).

<sup>1</sup>H NMR (500 MHz, CDCl<sub>3</sub>) δ 7.22 (d, *J* = 8.5 Hz, 2H), 6.89 (d, *J* = 8.5 Hz, 2H), 5.64 (d, *J* = 47.3 Hz, 1H), 3.81 (s, 3H), 3.70 (t, *J* = 4.5 Hz, 4H), 2.88–2.74 (m, 1H), 2.74–2.54 (m, 4H), 1.06 (d, *J* = 6.6 Hz, 3H).

<sup>13</sup>C NMR (125 MHz, CDCl<sub>3</sub>) δ 159.2, 126.6 (d, *J<sub>C-F</sub>* = 8.2 Hz), 113.6, 94.8 (d, *J<sub>C-F</sub>* = 177.1 Hz), 67.4, 64.8 (d, *J<sub>C-F</sub>* = 22.9 Hz), 55.3, 49.9, 7.8.

<sup>19</sup>F NMR (471 MHz, CDCl<sub>3</sub>) δ -189.81.

**FTIR** (thin film): cm<sup>-1</sup> 2924, 2852, 1613, 1514, 1453, 1247, 1115, 1033, 981, 828.

**HRMS** (ESI) *m/z*: [M+H]<sup>+</sup> Calcd for C<sub>14</sub>H<sub>21</sub>FNO<sub>2</sub><sup>+</sup> 254.1551; found: 254.1548.

The assignments of relative stereochemistry of two diastereomers **3w-I** and **3w-II** are based on the <sup>1</sup>H, <sup>13</sup>C, and <sup>19</sup>F-NMR analysis in comparison to **3v-I** and **3v-II**.

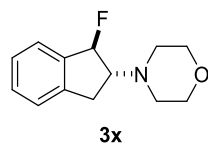

**4-(1-Fluoro-2,3-dihydro-1H-inden-2-yl)morpholine (3x).** Synthesized using **GP3** from **1x** and *O*-benzoylhydroxylmorpholine **2a**. <sup>1</sup>H-NMR analysis of the crude reaction mixture indicated a diastereomeric ratio (dr) of 10:1. Isolated as a mixture of two diastereomers by flash column chromatography (10% ethyl acetate–hexanes to 20% ethyl acetate–hexanes), as a pale-yellow oil (26.5 mg, 60%).

*R<sub>f</sub>* = 0.20 (33% ethyl acetate–hexanes).

<sup>1</sup>H NMR (500 MHz, CDCl<sub>3</sub>) δ 7.41 (d, *J* = 7.1 Hz, 1H), 7.34–7.25 (m, 2H), 7.22 (d, *J* = 7.2 Hz, 1H), 6.00 (dd, *J* = 57.7, 5.5 Hz, 1H), 3.79 (t, *J* = 4.7 Hz, 4H), 3.35–3.09 (m, 2H), 2.90–2.76 (m, 1H), 2.72 (s, 2H), 2.65–2.56 (m, 2H).

<sup>13</sup>C NMR (125 MHz, CDCl<sub>3</sub>) δ 139.5 (d, *J<sub>C-F</sub>* = 5.3 Hz), 139.0 (d, *J<sub>C-F</sub>* = 20.5 Hz), 129.4 (d, *J<sub>C-F</sub>* = 2.3 Hz), 127.3 (d, *J<sub>C-F</sub>* = 1.8 Hz), 124.8, 124.6, 99.0 (d, *J<sub>C-F</sub>* = 179.9 Hz), 73.3 (d, *J<sub>C-F</sub>* = 17.4 Hz), 66.9, 52.4, 34.2 (d, *J<sub>C-F</sub>* = 5.6 Hz).

<sup>19</sup>F NMR (471 MHz, CDCl<sub>3</sub>) δ -170.49 (major), -180.50 (minor).

**FTIR** (thin film): cm<sup>-1</sup> 2949, 2850, 1483, 1356, 1146, 1115, 1001, 896, 751, 664.

**HRMS** (ESI) *m/z*: [M+H]<sup>+</sup> Calcd for C<sub>13</sub>H<sub>17</sub>FNO<sup>+</sup> 222.1289; found: 222.1295.

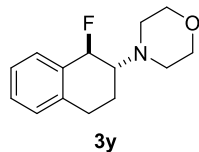

**4-(1-Fluoro-1,2,3,4-tetrahydronaphthalen-2-yl)morpholine (3y).** Synthesized using **GP3** from **1y** and morpholino dodecanoate **2t**. Only one diastereomer (dr >20:1) was observed by <sup>1</sup>H-NMR analysis of the crude reaction mixture. Isolated by flash column chromatography (5% ethyl acetate–hexanes to 15% ethyl acetate–hexanes), as a pale-yellow oil (24.5 mg, 52%).

**R<sub>f</sub>** = 0.30 (20% ethyl acetate–hexanes).

**<sup>1</sup>H NMR** (500 MHz, CDCl<sub>3</sub>) δ 7.48 (d, *J* = 4.0 Hz, 1H), 7.25 (dd, *J* = 5.7, 3.5 Hz, 2H), 7.12 (d, *J* = 4.0 Hz, 1H), 5.71 (dd, *J* = 52.7, 7.9 Hz, 1H), 3.76 (t, *J* = 4.3 Hz, 4H), 3.04–2.92 (m, 1H), 2.90–2.84 (m, 2H), 2.83–2.71 (m, 4H), 2.12 (ddt, *J* = 12.2, 8.0, 4.2 Hz, 1H), 1.76 (ddd, *J* = 24.5, 12.2, 8.0 Hz, 1H).

**<sup>13</sup>C NMR** (125 MHz, CDCl<sub>3</sub>) δ 137.0 (d, *J*<sub>C-F</sub> = 3.6 Hz), 134.4 (d, *J*<sub>C-F</sub> = 17.7 Hz), 128.4, 128.4 (d, *J*<sub>C-F</sub> = 5.7 Hz), 128.2, 126.5, 89.8 (d, *J*<sub>C-F</sub> = 173.4 Hz), 67.3, 65.1 (d, *J*<sub>C-F</sub> = 17.4 Hz), 50.1, 28.5, 23.4 (d, *J*<sub>C-F</sub> = 6.7 Hz).

**<sup>19</sup>F NMR** (471 MHz, CDCl<sub>3</sub>) δ -167.52.

**FTIR** (thin film): cm<sup>-1</sup> 2923, 2852, 1734, 1454, 1251, 1117, 1012, 746.

**HRMS** (ESI) *m/z*: [M+H]<sup>+</sup> Calcd for C<sub>14</sub>H<sub>19</sub>FNO<sup>+</sup> 236.1445; found: 236.1442.

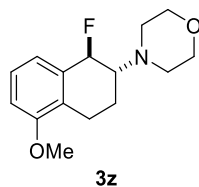

**4-(1-Fluoro-5-methoxy-1,2,3,4-tetrahydronaphthalen-2-yl)morpholine (3z).** Synthesized using **GP3** from **1z** and *O*-benzoylhydroxymorpholine **2a**. Only one diastereomer (dr >20:1) was observed by <sup>1</sup>H-NMR analysis of the crude reaction mixture. Isolated by flash column chromatography (5% ethyl acetate–hexanes to 12% ethyl acetate–hexanes), as a pale-yellow oil (28.6 mg, 54%).

**R<sub>f</sub>** = 0.20 (20% ethyl acetate–hexanes).

**<sup>1</sup>H NMR** (500 MHz, CDCl<sub>3</sub>) δ 7.23 (t, *J* = 8.0 Hz, 1H), 7.10 (d, *J* = 7.8 Hz, 1H), 6.78 (d, *J* = 8.1 Hz, 1H), 5.68 (dd, *J* = 52.5, 8.0 Hz, 1H), 3.82 (s, 3H), 3.75 (t, *J* = 4.6 Hz, 4H), 2.97–2.83 (m, 2H), 2.81–2.68 (m, 4H), 2.64–2.51 (m, 1H), 2.18–2.05 (m, 1H), 1.77–1.63 (m, 1H).

**<sup>13</sup>C NMR** (125 MHz, CDCl<sub>3</sub>) δ 156.5, 136.0 (d, *J*<sub>C-F</sub> = 18.3 Hz), 127.0, 126.0 (d, *J*<sub>C-F</sub> = 3.7 Hz), 120.0 (d, *J*<sub>C-F</sub> = 8.0 Hz), 109.3, 89.7 (d, *J*<sub>C-F</sub> = 173.8 Hz), 67.5, 64.3 (d, *J*<sub>C-F</sub> = 17.1 Hz), 55.4, 50.1, 22.6 (d, *J*<sub>C-F</sub> = 1.4 Hz), 22.5 (d, *J*<sub>C-F</sub> = 2.3 Hz).

**<sup>19</sup>F NMR** (471 MHz, CDCl<sub>3</sub>) δ -168.61.

**FTIR** (thin film): cm<sup>-1</sup> 2951, 2855, 1587, 1473, 1263, 1111, 1069, 941, 790, 746.

**HRMS** (ESI) *m/z*: [M+H]<sup>+</sup> Calcd for C<sub>15</sub>H<sub>21</sub>FNO<sub>2</sub><sup>+</sup> 266.1551; found: 266.1550.

## 5. Scope of amines and compound characterization data

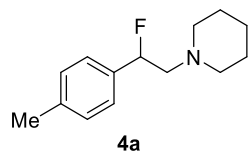

**1-(2-Fluoro-2-(*p*-tolyl)ethyl)piperidine (4a).** Synthesized using **GP3** from **1a** and *O*-benzoylhydroxylpiperidine **2b**. Isolated by flash column chromatography (5% ethyl acetate–hexanes to 10% ethyl acetate–hexanes), as a pale oil (21.0 mg, 47%).

$R_f$  = 0.30 (20% ethyl acetate–hexanes).

$^1\text{H NMR}$  (500 MHz,  $\text{CDCl}_3$ )  $\delta$  7.23 (d,  $J$  = 8.0 Hz, 2H), 7.17 (d,  $J$  = 8.0 Hz, 2H), 5.64 (ddd,  $J$  = 49.0, 8.9, 2.0 Hz, 1H), 3.01–2.79 (m, 1H), 2.70–2.56 (m, 1H), 2.56–2.45 (m, 4H), 2.35 (s, 3H), 1.70–1.52 (m, 4H), 1.51–1.37 (m, 2H).

$^{13}\text{C NMR}$  (125 MHz,  $\text{CDCl}_3$ )  $\delta$  138.1 (d,  $J_{\text{C-F}}$  = 1.6 Hz), 136.3 (d,  $J_{\text{C-F}}$  = 20.2 Hz), 129.1, 125.6 (d,  $J_{\text{C-F}}$  = 6.6 Hz), 92.6 (d,  $J_{\text{C-F}}$  = 172.8 Hz), 65.5 (d,  $J_{\text{C-F}}$  = 23.4 Hz), 55.0, 26.0, 24.2, 21.2.

$^{19}\text{F NMR}$  (471 MHz,  $\text{CDCl}_3$ )  $\delta$  -174.77.

**FTIR** (thin film):  $\text{cm}^{-1}$  2932, 2853, 1516, 1452, 1300, 1121, 1017, 880, 814, 759.

**HRMS** (ESI)  $m/z$ :  $[\text{M}+\text{H}]^+$  Calcd for  $\text{C}_{14}\text{H}_{21}\text{FN}^+$  222.1653; found: 222.1657.

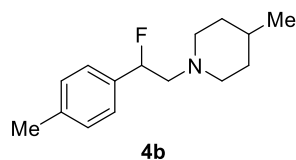

**1-(2-Fluoro-2-(*p*-tolyl)ethyl)-4-methylpiperidine (4b).** Synthesized using **GP3** from **1a** and *O*-benzoyl-4-methyl-hydroxylpiperidine **2c**. Isolated by flash column chromatography (5% ethyl acetate–hexanes to 10% ethyl acetate–hexanes), as a pale oil (15.3 mg, 32%).

$R_f$  = 0.20 (10% ethyl acetate–hexanes).

$^1\text{H NMR}$  (500 MHz,  $\text{CDCl}_3$ )  $\delta$  7.23 (d,  $J$  = 8.0 Hz, 2H), 7.17 (d,  $J$  = 8.0 Hz, 2H), 5.63 (ddd,  $J$  = 49.0, 8.9, 2.2 Hz, 1H), 3.08–3.01 (m, 1H), 3.00–2.95 (m, 1H), 2.90 (ddd,  $J$  = 17.3, 14.3, 9.0 Hz, 1H), 2.59 (ddd,  $J$  = 35.3, 14.3, 2.4 Hz, 1H), 2.35 (s, 3H), 2.19–2.06 (m, 2H), 1.72–1.58 (m, 2H), 1.45–1.23 (m, 3H), 0.93 (d,  $J$  = 6.1 Hz, 3H).

$^{13}\text{C NMR}$  (125 MHz,  $\text{CDCl}_3$ )  $\delta$  138.1 (d,  $J_{\text{C-F}}$  = 1.4 Hz), 136.3 (d,  $J_{\text{C-F}}$  = 20.0 Hz), 129.1, 125.6 (d,  $J_{\text{C-F}}$  = 6.6 Hz), 92.7 (d,  $J_{\text{C-F}}$  = 172.8 Hz), 65.1 (d,  $J_{\text{C-F}}$  = 23.3 Hz), 54.6, 54.3, 34.3, 30.6, 21.9, 21.2.

$^{19}\text{F NMR}$  (471 MHz,  $\text{CDCl}_3$ )  $\delta$  -174.83.

**FTIR** (thin film):  $\text{cm}^{-1}$  2947, 2922, 2869, 1721, 1454, 1269, 1125, 1041, 978, 811.

**HRMS** (ESI)  $m/z$ :  $[\text{M}+\text{H}]^+$  Calcd for  $\text{C}_{15}\text{H}_{23}\text{FN}^+$  236.1809; found: 236.1807.

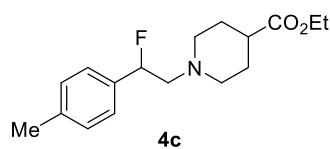

**Ethyl 1-(2-fluoro-2-(*p*-tolyl)ethyl)piperidine-4-carboxylate (4c).** Synthesized using **GP3** from **1a** and *O*-benzoyl-4-ethoxycarbonylhydroxylpiperidine **2d**. Isolated by flash column chromatography (10% ethyl acetate–hexanes to 30% ethyl acetate–hexanes), as a pale oil (35.2 mg, 60%).

$R_f$  = 0.27 (50% ethyl acetate–hexanes).

$^1\text{H NMR}$  (500 MHz,  $\text{CDCl}_3$ )  $\delta$  7.22 (d,  $J$  = 7.9 Hz, 2H), 7.18 (d,  $J$  = 7.9 Hz, 2H), 5.61 (ddd,  $J$  = 48.8, 8.7, 2.5 Hz, 1H), 4.14 (q,  $J$  = 7.1 Hz, 2H), 3.03 (d,  $J$  = 11.4 Hz, 1H), 2.95 (d,  $J$  = 11.4 Hz, 1H), 2.90 (ddd,  $J$  = 17.2, 14.3, 8.7 Hz, 1H), 2.61 (ddd,  $J$  = 34.0, 14.3, 2.5 Hz, 1H), 2.35 (s, 3H), 2.29–2.17 (m, 3H), 1.95–1.88 (m, 2H), 1.87–1.75 (m, 2H), 1.25 (t,  $J$  = 7.1 Hz, 3H).

$^{13}\text{C NMR}$  (125 MHz,  $\text{CDCl}_3$ )  $\delta$  175.1, 138.2 (d,  $J_{\text{C-F}}$  = 1.9 Hz), 136.0 (d,  $J_{\text{C-F}}$  = 20.1 Hz), 129.1, 125.5 (d,  $J_{\text{C-F}}$  = 6.7 Hz), 92.7 (d,  $J_{\text{C-F}}$  = 172.9 Hz), 64.7 (d,  $J_{\text{C-F}}$  = 23.6 Hz), 60.3, 53.4, 53.4, 40.9, 28.3, 21.2, 14.2.

$^{19}\text{F NMR}$  (471 MHz,  $\text{CDCl}_3$ )  $\delta$  -174.99.

**FTIR** (thin film):  $\text{cm}^{-1}$  2944, 2803, 1729, 1515, 1448, 1284, 1181, 1047, 816, 527.

**HRMS** (ESI)  $m/z$ :  $[M+H]^+$  Calcd for  $C_{17}H_{25}FNO_2^+$  294.1864; found: 294.1869.

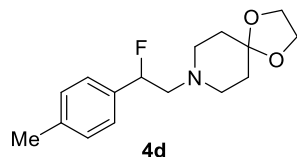

**8-(2-Fluoro-2-(*p*-tolyl)ethyl)-1,4-dioxo-8-azaspiro[4.5]decane (4d)**. Synthesized using **GP3** from **1a** and 1,4-dioxo-8-azaspiro[4.5]decan-8-yl benzoate **2e**. Isolated by flash column chromatography (10% ethyl acetate–hexanes to 33% ethyl acetate–hexanes), as a colorless oil (27.7 mg, 50%).

$R_f$  = 0.20 (33% ethyl acetate–hexanes).

$^1H$  NMR ( $CDCl_3$ , 500 MHz):  $\delta$  7.23 (d,  $J$  = 8.0 Hz, 2H), 7.18 (d,  $J$  = 8.0 Hz, 2H), 5.61 (ddd,  $J$  = 49.6, 8.9, 2.3 Hz, 1H), 3.96 (s, 4H), 2.95 (ddd,  $J$  = 17.2, 14.3, 8.9 Hz, 1H), 2.70 (br s, 4H), 2.66–2.57 (m, 1H), 2.35 (s, 3H), 1.84–1.75 (m, 4H).

$^{13}C$  NMR ( $CDCl_3$ , 125 MHz):  $\delta$  138.2 (d,  $J_{C-F}$  = 1.6 Hz), 136.0 (d,  $J_{C-F}$  = 19.9 Hz), 129.1, 125.5 (d,  $J_{C-F}$  = 6.5 Hz), 107.0, 92.7 (d,  $J_{C-F}$  = 172.9 Hz), 64.2, 64.2 (d,  $J_{C-F}$  = 23.6 Hz), 51.8, 34.8, 21.2.

$^{19}F$  NMR ( $CDCl_3$ , 471 MHz):  $\delta$  -175.35

**FTIR** (thin film):  $cm^{-1}$  1143, 1094, 1039, 964, 946, 915, 818.

**HRMS** (ESI)  $m/z$ :  $[M+H]^+$  Calcd for  $C_{16}H_{23}FNO_2^+$  280.1707; found: 280.1714.

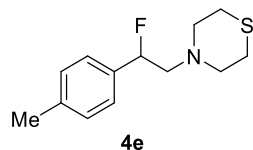

**4-(2-Fluoro-2-(*p*-tolyl)ethyl)thiomorpholine (4e)**. Synthesized using **GP3** from **1a** and *O*-benzoylhydroxylthiomorpholine **2f**. Isolated by flash column chromatography (10% ethyl acetate–hexanes to 15% ethyl acetate–hexanes), as a pale oil (33.1 mg, 69%).

$R_f$  = 0.10 (10% ethyl acetate–hexanes).

$^1H$  NMR (500 MHz,  $CDCl_3$ )  $\delta$  7.22 (d,  $J$  = 8.1 Hz, 2H), 7.18 (d,  $J$  = 8.1 Hz, 2H), 5.60 (ddd,  $J$  = 48.7, 8.5, 2.3 Hz, 1H), 3.02–2.89 (m, 1H), 2.89–2.83 (m, 4H), 2.75–2.69 (m, 4H), 2.69–2.58 (m, 1H), 2.36 (s, 3H).

$^{13}C$  NMR (125 MHz,  $CDCl_3$ )  $\delta$  138.3 (d,  $J_{C-F}$  = 1.7 Hz), 135.8 (d,  $J_{C-F}$  = 20.1 Hz), 129.2, 125.6 (d,  $J_{C-F}$  = 6.5 Hz), 92.5 (d,  $J_{C-F}$  = 173.2 Hz), 65.2 (d,  $J_{C-F}$  = 23.8 Hz), 55.4, 28.0, 21.2.

$^{19}F$  NMR (471 MHz,  $CDCl_3$ )  $\delta$  -175.19.

**FTIR** (thin film):  $cm^{-1}$  2920, 2808, 1719, 1516, 1454, 1273, 1131, 1040, 957, 815, 755.

**HRMS** (ESI)  $m/z$ :  $[M+H]^+$  Calcd for  $C_{13}H_{19}FNS^+$  240.1217; found: 240.1220.

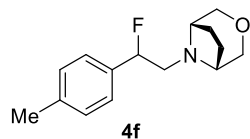

**8-(2-Fluoro-2-phenylethyl)-3-oxa-8-azabicyclo[3.2.1]octane (4f)**. Synthesized using **GP3** from **1a** and 3-oxa-8-azabicyclo[3.2.1]octan-8-yl benzoate **2g**. Isolated by flash column chromatography (10% ethyl acetate–hexanes to 20% ethyl acetate–hexanes), as a pale-yellow oil (26.0 mg, 52%).

$R_f$  = 0.10 (30% ethyl acetate–hexanes).

$^1H$  NMR (500 MHz,  $CDCl_3$ )  $\delta$  7.24 (d,  $J$  = 7.9 Hz, 2H), 7.18 (d,  $J$  = 7.9 Hz, 2H), 5.57 (ddd,  $J$  = 48.4, 8.1, 3.1 Hz, 1H), 3.76 (dd,  $J$  = 14.4, 10.4 Hz, 2H), 3.49 (ddd,  $J$  = 12.6, 10.4, 1.9 Hz, 2H), 3.28–3.24 (m, 1H), 3.00–2.93 (m, 1H), 2.81 (ddd,  $J$  = 17.9, 14.1, 8.1 Hz, 1H), 2.51 (ddd,  $J$  = 31.7, 14.1, 3.1 Hz, 1H), 2.36 (s,

3H), 1.98–1.78 (m, 4H).

$^{13}\text{C}$  NMR (125 MHz,  $\text{CDCl}_3$ )  $\delta$  138.2 (d,  $J_{\text{C-F}} = 1.9$  Hz), 136.0 (d,  $J_{\text{C-F}} = 20.1$  Hz), 129.0, 125.7 (d,  $J_{\text{C-F}} = 6.7$  Hz), 94.8 (d,  $J_{\text{C-F}} = 172.0$  Hz), 73.1, 73.1, 62.1, 61.8 (d,  $J_{\text{C-F}} = 2.2$  Hz), 60.3 (d,  $J_{\text{C-F}} = 23.7$  Hz), 25.1, 24.8, 21.2.

$^{19}\text{F}$  NMR (471 MHz,  $\text{CDCl}_3$ )  $\delta$  -176.73.

FTIR (thin film):  $\text{cm}^{-1}$  2946, 2855, 1516, 1182, 1132, 1008, 981, 883, 816, 641, 543.

HRMS (ESI)  $m/z$ :  $[\text{M}+\text{H}]^+$  Calcd for  $\text{C}_{15}\text{H}_{21}\text{FNO}^+$  250.1602; found: 250.1608.

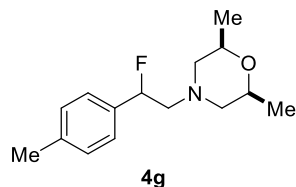

**4-(2-Fluoro-2-(*p*-tolyl)ethyl)-2,6-dimethylmorpholine (4g).** Synthesized using **GP3** from **1a** and *O*-benzoyl-2,6-dimethyl-hydroxymorpholine **2h**. Isolated by flash column chromatography (10% ethyl acetate–hexanes to 15% ethyl acetate–hexanes), as a pale oil (43.1 mg, 86%).

$R_f = 0.10$  (10% ethyl acetate–hexanes).

$^1\text{H}$  NMR (500 MHz,  $\text{CDCl}_3$ )  $\delta$  7.23 (d,  $J = 8.0$  Hz, 2H), 7.18 (d,  $J = 8.0$  Hz, 2H), 5.63 (ddd,  $J = 49.0, 8.9, 2.1$  Hz, 1H), 3.84–3.53 (m, 2H), 2.92 (d,  $J = 9.2$  Hz, 1H), 2.91 – 2.84 (m, 1H), 2.81 (d,  $J = 10.6$  Hz, 1H), 2.59 (ddd,  $J = 34.9, 14.2, 2.1$  Hz, 1H), 2.36 (s, 3H), 1.92 (dt,  $J = 17.8, 10.6$  Hz, 2H), 1.18 (d,  $J = 2.7$  Hz, 3H), 1.16 (d,  $J = 2.7$  Hz, 3H).

$^{13}\text{C}$  NMR (125 MHz,  $\text{CDCl}_3$ )  $\delta$  138.3 (d,  $J_{\text{C-F}} = 1.7$  Hz), 135.8 (d,  $J_{\text{C-F}} = 19.9$  Hz), 129.2, 125.6 (d,  $J_{\text{C-F}} = 6.7$  Hz), 92.6 (d,  $J_{\text{C-F}} = 172.9$  Hz), 71.7, 71.6, 64.6 (d,  $J_{\text{C-F}} = 23.1$  Hz), 60.1, 59.6, 21.2, 19.2, 19.1.

$^{19}\text{F}$  NMR (471 MHz,  $\text{CDCl}_3$ )  $\delta$  -175.17.

FTIR (thin film):  $\text{cm}^{-1}$  2972, 2864, 1516, 1454, 1323, 1142, 1083, 1027, 885, 812, 712.

HRMS (ESI)  $m/z$ :  $[\text{M}+\text{H}]^+$  Calcd for  $\text{C}_{15}\text{H}_{23}\text{FNO}^+$  252.1758; found: 252.1753.

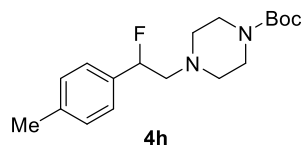

**tert-Butyl 4-(2-fluoro-2-(*p*-tolyl)ethyl)piperazine-1-carboxylate (4h).** Synthesized using **GP3** from **1a** and *O*-benzoyl-4-*tert*-butoxycarbonyl-hydroxypiperazine **2i**. Isolated by flash column chromatography (10% ethyl acetate–hexanes to 30% ethyl acetate–hexanes), as a pale oil (39.9 mg, 62%).

$R_f = 0.25$  (30% ethyl acetate–hexanes).

$^1\text{H}$  NMR (500 MHz,  $\text{CDCl}_3$ )  $\delta$  7.23 (d,  $J = 8.0$  Hz, 2H), 7.16 (d,  $J = 8.0$  Hz, 2H), 5.59 (ddd,  $J = 48.8, 8.8, 2.3$  Hz, 1H), 3.47–3.44 (m, 4H), 2.87 (ddd,  $J = 17.1, 14.3, 8.8$  Hz, 1H), 2.62–2.43 (m, 5H), 2.27 (s, 3H), 1.39 (s, 9H).

$^{13}\text{C}$  NMR (125 MHz,  $\text{CDCl}_3$ )  $\delta$  154.7, 138.3, 135.7 (d,  $J_{\text{C-F}} = 20.0$  Hz), 129.1, 125.5 (d,  $J_{\text{C-F}} = 6.59$  Hz), 92.63 (d,  $J_{\text{C-F}} = 173.0$  Hz), 79.6, 64.5 (d,  $J_{\text{C-F}} = 23.5$  Hz), 53.4, 28.6, 21.4.

$^{19}\text{F}$  NMR (471 MHz,  $\text{CDCl}_3$ )  $\delta$  -175.12

FTIR (thin film):  $\text{cm}^{-1}$  2975, 2928, 2860, 2811, 1693, 1455, 1419, 1365, 1243, 1170, 1125, 1004, 816.

HRMS (ESI)  $m/z$ :  $[\text{M}+\text{H}]^+$  Calcd for  $\text{C}_{17}\text{H}_{25}\text{FNO}_2^+$  294.1864; found: 294.1869.

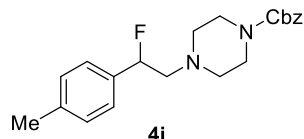

**2-(4-(2-Fluoro-2-(*p*-tolyl)ethyl)piperazin-1-yl)-1-phenylethan-1-one (4i).** Synthesized using **GP3** from **1a** and *O*-benzoyl-4-benzoyloxycarbonyl-hydroxylpiperazine **2j**. Isolated by flash column chromatography (12% ethyl acetate–hexanes to 20% ethyl acetate–hexanes), as a yellow oil (54.1 mg, 76%).

$R_f$  = 0.38 (50% ethyl acetate–hexanes).

$^1\text{H NMR}$  ( $\text{CDCl}_3$ , 500 MHz):  $\delta$  7.39–7.30 (m, 5H), 7.23 (d,  $J$  = 8.0 Hz, 2H), 7.18 (d,  $J$  = 8.0 Hz, 2H), 5.61 (ddd,  $J$  = 48.8, 8.8, 2.3 Hz, 1H), 5.14 (s, 2H), 3.75–3.45 (m, 4H), 2.93 (ddd,  $J$  = 17.0, 14.3, 8.8 Hz, 1H), 2.71–2.62 (m, 1H), 2.61–2.57 (m, 4H), 2.36 (s, 3H).

$^{13}\text{C NMR}$  ( $\text{CDCl}_3$ , 125 MHz):  $\delta$  155.2, 138.4, 136.7, 135.6 (d,  $J_{\text{C-F}}$  = 20.1 Hz), 129.2, 128.4, 128.0, 127.9, 125.5 (d,  $J_{\text{C-F}}$  = 6.7 Hz), 92.6 (d,  $J_{\text{C-F}}$  = 173.3 Hz), 67.1, 64.4 (d,  $J_{\text{C-F}}$  = 23.6 Hz), 53.3, 43.8, 21.1.

$^{19}\text{F NMR}$  ( $\text{CDCl}_3$ , 471 MHz):  $\delta$  -175.15.

**FTIR** (thin film):  $\text{cm}^{-1}$  1696, 1455, 1428, 1235, 1123, 1003, 762, 697.

**HRMS** (ESI)  $m/z$ :  $[\text{M}+\text{H}]^+$  Calcd for  $\text{C}_{21}\text{H}_{26}\text{FN}_2\text{O}_2^+$  357.1973; found: 357.1977.

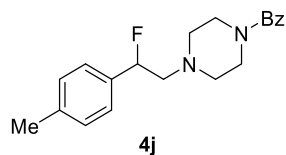

**4-(2-Fluoro-2-(*p*-tolyl)ethyl)piperazin-1-yl(phenyl)methanone (4j).** Synthesized using **GP3** from **1a** and *O*-benzoyl-4-benzoylhydroxylpiperazine **2k**. Isolated by flash column chromatography (20% ethyl acetate–hexanes to 50% ethyl acetate–hexanes), as a yellow oil. (45.1 mg, 69%).

$R_f$  = 0.40 (50% ethyl acetate–hexanes).

$^1\text{H NMR}$  (500 MHz,  $\text{CDCl}_3$ )  $\delta$  7.40 (s, 5H), 7.22 (d,  $J$  = 8.0 Hz, 2H), 7.18 (d,  $J$  = 8.0 Hz, 2H), 5.62 (ddd,  $J$  = 48.8, 8.7, 2.3 Hz, 1H), 3.82 (br, 2H), 3.46 (br, 2H), 2.94 (ddd,  $J$  = 17.0, 14.3, 8.7 Hz, 1H), 2.79–2.46 (m, 5H), 2.35 (s, 3H).

$^{13}\text{C NMR}$  (125 MHz,  $\text{CDCl}_3$ )  $\delta$  170.3, 138.4 (d,  $J_{\text{C-F}}$  = 1.8 Hz), 135.7, 135.5 (d,  $J_{\text{C-F}}$  = 20.0 Hz), 129.6, 129.2, 128.4, 127.0, 125.5 (d,  $J_{\text{C-F}}$  = 6.6 Hz), 92.6 (d,  $J_{\text{C-F}}$  = 173.2 Hz), 64.2 (d,  $J_{\text{C-F}}$  = 23.6 Hz), 53.8, 53.3, 47.6, 42.1, 21.1.

$^{19}\text{F NMR}$  (471 MHz,  $\text{CDCl}_3$ )  $\delta$  -175.16.

**FTIR** (thin film):  $\text{cm}^{-1}$  1648, 1414, 1406, 1215, 1114, 754, 598.

**HRMS** (ESI)  $m/z$ :  $[\text{M}+\text{H}]^+$  Calcd for  $\text{C}_{20}\text{H}_{24}\text{FN}_2\text{O}^+$  327.1867; found: 327.1872.

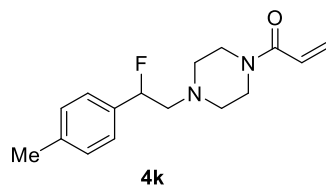

**1-(4-(2-Fluoro-2-(*p*-tolyl)ethyl)piperazin-1-yl)prop-2-en-1-one (4k).** Synthesized using **GP3** from **1a** and 4-acryloylpiperazin-1-yl benzoate **2u**. Isolated by flash column chromatography (30% ethyl acetate–hexanes to 50% ethyl acetate–hexanes), as a pale oil (27.0 mg, 49%).

$R_f$  = 0.10 (50% ethyl acetate–hexanes).

$^1\text{H NMR}$  (500 MHz,  $\text{CDCl}_3$ )  $\delta$  7.22 (d,  $J$  = 7.9 Hz, 2H), 7.18 (d,  $J$  = 7.9 Hz, 2H), 6.56 (dd,  $J$  = 16.8, 10.6



Hz, 1H), 6.28 (dd,  $J = 16.8, 1.5$  Hz, 1H), 5.69 (dd,  $J = 10.6, 1.5$  Hz, 1H), 5.59 (ddd,  $J = 49.0, 8.9, 2.1$  Hz, 1H), 3.88–3.50 (m, 4H), 3.04–2.85 (m, 1H), 2.75–2.66 (m, 1H), 2.66–2.50 (m, 4H), 2.35 (s, 3H).

$^{13}\text{C}$  NMR (125 MHz,  $\text{CDCl}_3$ )  $\delta$  165.3, 138.5 (d,  $J_{\text{C-F}} = 1.2$  Hz), 135.5 (d,  $J_{\text{C-F}} = 20.2$  Hz), 129.2, 127.9, 127.4, 125.6 (d,  $J_{\text{C-F}} = 6.5$  Hz), 64.2 (d,  $J_{\text{C-F}} = 23.7$  Hz), 53.8, 53.2, 45.8, 41.9, 21.2.

$^{19}\text{F}$  NMR (471 MHz,  $\text{CDCl}_3$ )  $\delta$  -175.16.

FTIR (thin film):  $\text{cm}^{-1}$  2922, 2857, 1642, 1612, 1439, 1233, 1147, 1001, 818, 790, 717.

HRMS (ESI)  $m/z$ :  $[\text{M}+\text{H}]^+$  Calcd for  $\text{C}_{16}\text{H}_{22}\text{FN}_2\text{O}^+$  277.1711; found: 277.1711.

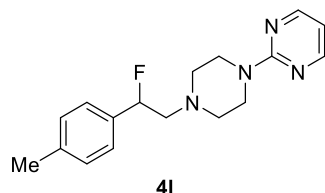

**2-(4-(2-Fluoro-2-(*p*-tolyl)ethyl)piperazin-1-yl)pyrimidine (4l).** Synthesized using **GP3** from **1a** and 4-(pyrimidin-2-yl)piperazin-1-yl benzoate **2l**. Isolated by flash column chromatography (20% ethyl acetate–hexanes to 33% ethyl acetate–hexanes), as a pale oil (28.2 mg, 47%).

$R_f = 0.10$  (30% ethyl acetate–hexanes).

$^1\text{H}$  NMR (500 MHz,  $\text{CDCl}_3$ )  $\delta$  8.31 (d,  $J = 4.7$  Hz, 2H), 7.25 (d,  $J = 7.8$  Hz, 2H), 7.19 (d,  $J = 7.8$  Hz, 2H), 6.48 (t,  $J = 4.7$  Hz, 1H), 5.67 (ddd,  $J = 48.6, 8.3, 1.2$  Hz, 1H), 3.87 (t,  $J = 4.9$  Hz, 4H), 3.03–2.88 (m, 1H), 2.74–2.58 (m, 1H), 2.74–2.58 (m, 4H), 2.36 (s, 3H).

$^{13}\text{C}$  NMR (125 MHz,  $\text{CDCl}_3$ )  $\delta$  161.7, 161.5, 157.7, 138.4 (d,  $J_{\text{C-F}} = 1.5$  Hz), 135.8 (d,  $J_{\text{C-F}} = 19.8$  Hz), 129.2, 125.6 (d,  $J_{\text{C-F}} = 6.5$  Hz), 109.9, 92.7 (d,  $J_{\text{C-F}} = 173.0$  Hz), 64.7 (d,  $J_{\text{C-F}} = 23.4$  Hz), 53.5, 43.7, 21.2.

$^{19}\text{F}$  NMR (471 MHz,  $\text{CDCl}_3$ )  $\delta$  -175.11.

FTIR (thin film):  $\text{cm}^{-1}$  2938, 2852, 1583, 1545, 1497, 1358, 1257, 982, 796.

HRMS (ESI)  $m/z$ :  $[\text{M}+\text{H}]^+$  Calcd for  $\text{C}_{17}\text{H}_{22}\text{FN}_4^+$  301.1823; found: 301.1816.

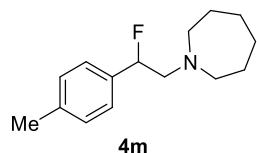

**1-(2-Fluoro-2-(*p*-tolyl)ethyl)azepane (4m).** Synthesized using **GP3** from **1a** and *O*-benzoylhydroxylazepane **2m**. Isolated by flash column chromatography (hexanes–dichloromethane–ethyl acetate = 15:1:1, v/v/v), as a pale oil (15.1 mg, 32%).

$R_f = 0.10$  (10% ethyl acetate–hexanes).

$^1\text{H}$  NMR (500 MHz,  $\text{CDCl}_3$ )  $\delta$  7.23 (d,  $J = 8.1$  Hz, 2H), 7.17 (d,  $J = 8.1$  Hz, 2H), 5.57 (ddd,  $J = 48.8, 8.4, 2.6$  Hz, 1H), 3.11–3.01 (m, 1H), 2.88–2.74 (m, 1H), 2.88–2.74 (m, 4H), 2.35 (s, 3H), 1.71–1.54 (m, 8H).

$^{13}\text{C}$  NMR (125 MHz,  $\text{CDCl}_3$ )  $\delta$  138.0 (d,  $J_{\text{C-F}} = 1.5$  Hz), 136.4 (d,  $J_{\text{C-F}} = 20.0$  Hz), 129.1, 125.6 (d,  $J_{\text{C-F}} = 6.9$  Hz), 93.2 (d,  $J_{\text{C-F}} = 172.8$  Hz), 63.7 (d,  $J_{\text{C-F}} = 23.6$  Hz), 55.8, 28.0, 27.1, 21.2.

$^{19}\text{F}$  NMR (471 MHz,  $\text{CDCl}_3$ )  $\delta$  -176.95.

FTIR (thin film):  $\text{cm}^{-1}$  2923, 2853, 1721, 1451, 1356, 1269, 1135, 1014, 814.

HRMS (ESI)  $m/z$ :  $[\text{M}+\text{H}]^+$  Calcd for  $\text{C}_{15}\text{H}_{23}\text{FN}^+$  236.1809; found: 236.1808.

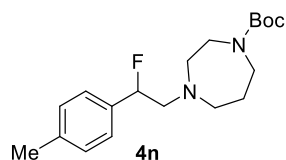

**tert-Butyl 4-(2-fluoro-2-(*p*-tolyl)ethyl)-1,4-diazepane-1-carboxylatez (4n).** Synthesized using **GP3** from **1a** and *tert*-butyl 4-(benzyloxy)-1,4-diazepane-1-carboxylate **2n**. Isolated by flash column chromatography (10% ethyl acetate–hexanes to 20% ethyl acetate–hexanes), as a colorless oil (26.9 mg, 40%).

$R_f$  = 0.27 (30% ethyl acetate–hexanes).

$^1\text{H NMR}$  (500 MHz,  $\text{CDCl}_3$ )  $\delta$  7.21 (d,  $J$  = 7.8 Hz, 2H), 7.17 (d,  $J$  = 7.8 Hz, 2H), 5.54 (ddd,  $J$  = 48.6, 8.3, 2.2 Hz, 1H), 3.52–3.39 (m, 4H), 3.04 (ddd,  $J$  = 16.6, 14.5, 8.3 Hz, 1H), 2.86–2.72 (m, 5H), 2.35 (s, 3H), 1.86–1.76 (m, 2H), 1.45 (s, 9H).

$^{13}\text{C NMR}$  (125 MHz,  $\text{CDCl}_3$ )  $\delta$  155.6, 155.4, 138.2 (d,  $J_{\text{C-F}}$  = 7.0 Hz), 135.9 (d,  $J_{\text{C-F}}$  = 19.9 Hz), 129.1, 125.5 (d,  $J_{\text{C-F}}$  = 6.6 Hz), 93.2 (d,  $J_{\text{C-F}}$  = 173.0 Hz), 93.2 (d,  $J_{\text{C-F}}$  = 173.4 Hz), 79.2, 76.7, 63.2, 63.0, 56.3, 56.1, 55.2, 55.0, 46.9, 46.4, 46.0, 45.1, 28.5, 27.9, 27.7, 21.1. (Mixture of *cis*- and *trans*-amide rotamers).

$^{19}\text{F NMR}$  (471 MHz,  $\text{CDCl}_3$ )  $\delta$  -176.75, -176.95. (The product gives two sets of  $^{19}\text{F NMR}$  signals, owing to the presence of *N*-Boc rotamers around the amide.).

**FTIR** (thin film):  $\text{cm}^{-1}$  2930, 1688, 1460, 1411, 1157, 903, 726.

**HRMS** (ESI)  $m/z$ :  $[\text{M}+\text{H}]^+$  Calcd for  $\text{C}_{19}\text{H}_{30}\text{FN}_2\text{O}_2^+$  337.2286; found: 337.2289.

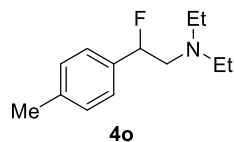

***N,N*-diethyl-2-fluoro-2-(*p*-tolyl)ethan-1-amine (4o).** Synthesized using **GP3** from **1a** and *O*-benzoylhydroxydiethylamine **2o**. Isolated by flash column chromatography (10% ethyl acetate–hexanes to 20% ethyl acetate–hexanes), as a pale oil (9.0 mg, 21%).

$R_f$  = 0.20 (30% ethyl acetate–hexanes).

$^1\text{H NMR}$  (500 MHz,  $\text{CDCl}_3$ )  $\delta$  7.23 (d,  $J$  = 7.9 Hz, 2H), 7.18 (d,  $J$  = 7.9 Hz, 2H), 5.55 (ddd,  $J$  = 48.6, 8.7, 2.5 Hz, 1H), 2.98 (ddd,  $J$  = 16.8, 14.7, 8.7 Hz, 1H), 2.77–2.69 (m, 1H), 2.69–2.62 (m, 4H), 2.35 (s, 3H), 1.06 (t,  $J$  = 7.1 Hz, 6H).

$^{13}\text{C NMR}$  (125 MHz,  $\text{CDCl}_3$ )  $\delta$  138.1 (d,  $J_{\text{C-F}}$  = 1.5 Hz), 136.3 (d,  $J_{\text{C-F}}$  = 20.5 Hz), 129.1, 125.6 (d,  $J_{\text{C-F}}$  = 6.5 Hz), 93.4 (d,  $J_{\text{C-F}}$  = 172.9 Hz), 59.4 (d,  $J_{\text{C-F}}$  = 23.9 Hz), 47.8, 21.2, 11.8.

$^{19}\text{F NMR}$  (471 MHz,  $\text{CDCl}_3$ )  $\delta$  -177.06.

**FTIR** (thin film):  $\text{cm}^{-1}$  2970, 2927, 1720, 1450, 1270, 1111, 1069, 816, 711.

**HRMS** (ESI)  $m/z$ :  $[\text{M}+\text{H}]^+$  Calcd for  $\text{C}_{13}\text{H}_{21}\text{FN}^+$  210.1653; found: 210.1650.

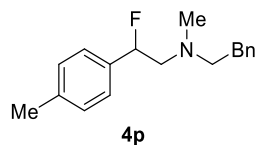

**2-Fluoro-*N*-methyl-*N*-phenethyl-2-(*p*-tolyl)ethan-1-amine (4p).** Synthesized using **GP3** from **1a** and *O*-benzoyl-*N*-benzyl-*N*-methylhydroxylamine **2q**. Isolated by flash column chromatography (10% ethyl acetate–hexanes to 20% ethyl acetate–hexanes), as a pale oil (29.8 mg, 55%).

$R_f$  = 0.10 (20% ethyl acetate–hexanes).

$^1\text{H NMR}$  (500 MHz,  $\text{CDCl}_3$ )  $\delta$  7.31–7.27 (m, 2H), 7.23 (d,  $J$  = 7.9 Hz, 2H), 7.18 (d,  $J$  = 7.9 Hz, 2H), 7.25–7.17 (m, 3H), 5.59 (ddd,  $J$  = 48.7, 8.6, 2.8 Hz, 1H), 3.01 (ddd,  $J$  = 16.6, 14.3, 8.6 Hz, 1H), 2.86–2.64 (m, 4H), 2.78–2.64 (m, 1H), 2.48 (s, 3H), 2.36 (s, 3H).

$^{13}\text{C NMR}$  (125 MHz,  $\text{CDCl}_3$ )  $\delta$  140.3, 138.2 (d,  $J_{\text{C-F}}$  = 1.7 Hz), 136.0 (d,  $J_{\text{C-F}}$  = 19.8 Hz), 129.2, 128.7, 128.4, 126.0, 125.6 (d,  $J_{\text{C-F}}$  = 6.5 Hz), 92.9 (d,  $J_{\text{C-F}}$  = 172.9 Hz), 63.5 (d,  $J_{\text{C-F}}$  = 23.9 Hz), 59.9, 42.9, 33.8, 21.2.

$^{19}\text{F}$  NMR (471 MHz,  $\text{CDCl}_3$ )  $\delta$  -176.41.

FTIR (thin film):  $\text{cm}^{-1}$  2924, 2851, 1453, 1122, 1030, 813, 746, 698.

HRMS (ESI)  $m/z$ :  $[\text{M}+\text{H}]^+$  Calcd for  $\text{C}_{18}\text{H}_{23}\text{FN}^+$  272.1809; found: 272.1802.

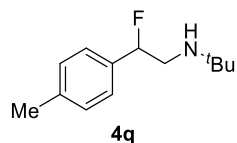

***N*-(2-Fluoro-2-(*p*-tolyl)ethyl)-2-methylpropan-2-amine (4q).** Synthesized using **GP3** from **1a** and *O*-benzoyl-*N*-(*tert*-butyl)hydroxylamine **2r**. Isolated by flash column chromatography (6% ethyl acetate–hexanes to 12% ethyl acetate–hexanes), as a pale oil (11.2 mg, 26%).

$R_f$  = 0.10 (12% ethyl acetate–hexanes).

$^1\text{H}$  NMR (500 MHz,  $\text{CDCl}_3$ )  $\delta$  7.25 (d,  $J$  = 7.9 Hz, 2H), 7.19 (d,  $J$  = 7.9 Hz, 2H), 5.51 (ddd,  $J$  = 48.9, 9.0, 3.0 Hz, 1H), 3.08 (ddd,  $J$  = 15.3, 12.5, 9.1 Hz, 1H), 2.80 (ddd,  $J$  = 33.3, 12.5, 3.2 Hz, 1H), 2.36 (s, 3H), 1.12 (s, 9H).

$^{13}\text{C}$  NMR (125 MHz,  $\text{CDCl}_3$ )  $\delta$  138.4 (d,  $J_{\text{C-F}}$  = 1.7 Hz), 135.7 (d,  $J_{\text{C-F}}$  = 19.6 Hz), 129.2, 125.7 (d,  $J_{\text{C-F}}$  = 6.5 Hz), 95.0 (d,  $J_{\text{C-F}}$  = 170.1 Hz), 50.3, 49.2 (d,  $J_{\text{C-F}}$  = 24.1 Hz), 28.9, 21.2.

$^{19}\text{F}$  NMR (471 MHz,  $\text{CDCl}_3$ )  $\delta$  -180.14.

FTIR (thin film):  $\text{cm}^{-1}$  2962, 2924, 1721, 1514, 1361, 1231, 1111, 1014, 815.

HRMS (ESI)  $m/z$ :  $[\text{M}+\text{H}]^+$  Calcd for  $\text{C}_{13}\text{H}_{21}\text{FN}^+$  210.1653; found: 210.1659.

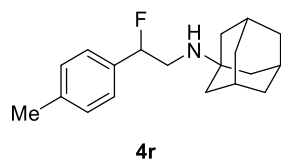

***N*-(2-Fluoro-2-(*p*-tolyl)ethyl)adamantan-1-amine (4r).** Synthesized using **GP3** from **1a** and *N*-(adamantan-1-yl)-*O*-benzoylhydroxylamine **2s**. Isolated by flash column chromatography (5% ethyl acetate–hexanes to 12% ethyl acetate–hexanes), as a pale oil (20.4 mg, 36%).

$R_f$  = 0.15 (12% ethyl acetate–hexanes).

$^1\text{H}$  NMR (500 MHz,  $\text{CDCl}_3$ )  $\delta$  7.25 (d,  $J$  = 8.0 Hz, 2H), 7.18 (d,  $J$  = 8.0 Hz, 2H), 5.49 (ddd,  $J$  = 49.0, 9.0, 3.2 Hz, 1H), 3.12 (ddd,  $J$  = 15.3, 12.5, 9.1 Hz, 1H), 2.82 (ddd,  $J$  = 33.4, 12.5, 3.2 Hz, 1H), 2.36 (s, 3H), 2.07 (s, 3H), 1.66 (d,  $J$  = 12.1 Hz, 6H), 1.63 – 1.56 (m, 6H).

$^{13}\text{C}$  NMR (125 MHz,  $\text{CDCl}_3$ )  $\delta$  138.4 (d,  $J_{\text{C-F}}$  = 1.8 Hz), 135.8 (d,  $J_{\text{C-F}}$  = 19.6 Hz), 129.2, 125.7 (d,  $J_{\text{C-F}}$  = 6.5 Hz), 95.2 (d,  $J_{\text{C-F}}$  = 170.0 Hz), 50.3, 47.1 (d,  $J_{\text{C-F}}$  = 24.3 Hz), 42.8, 36.7, 29.6, 21.2.

$^{19}\text{F}$  NMR (471 MHz,  $\text{CDCl}_3$ )  $\delta$  -180.02.

FTIR (thin film):  $\text{cm}^{-1}$  2901, 2846, 1515, 1450, 1356, 1310, 1151, 1111, 1033, 814.

HRMS (ESI)  $m/z$ :  $[\text{M}+\text{H}]^+$  Calcd for  $\text{C}_{19}\text{H}_{27}\text{FN}^+$  288.2122; found: 288.2123.

## 6. Aminofluorination of 1,3-dienes and compound characterization data

### General procedure 4 (GP4) for aminofluorination of 1,3-dienes

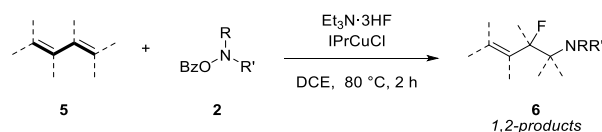

To a 10-mL FEP tube with Teflon-coated micro stir bar was added *O*-benzoylhydroxylamine **2** (0.2 mmol, 1.0 equiv) and IPrCuCl (4.9 mg, 5 mol %). DCE (1.0 mL), 1,3-diene **5** (0.4 mmol, 2.0 equiv) and Et<sub>3</sub>N•3HF (322 mg, 2 mmol, 10 equiv) were sequentially added. The mixture was allowed to stir at 80 °C for 2 h until the consumption of *O*-benzoylhydroxylamine (verified by TLC analysis, 20% ethyl acetate–hexanes). The resulting reaction mixture was cooled to room temperature and quenched through the addition of Et<sub>3</sub>N (0.5 mL). The solution was then diluted with ethyl acetate to a final volume of 5.0 mL and filtered through a plug of activated, neutral Al<sub>2</sub>O<sub>3</sub> (Brockman grade I, 58–60Å). The filtrate was concentrated under reduced pressure, providing the crude reaction mixture. The crude reaction mixture was purified by silica column chromatography.

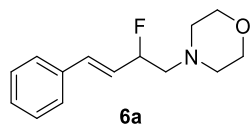

**(*E*)-4-(2-Fluoro-4-phenylbut-3-en-1-yl)morpholine (6a).** Synthesized using **GP4** from **5a** and *O*-benzoylhydroxylmorpholine **2a**. Isolated by flash column chromatography (12% ethyl acetate–hexanes to 20% ethyl acetate–hexanes), as a pale oil (21.2 mg, 45%).

**R<sub>f</sub>** = 0.20 (30% ethyl acetate–hexanes).

**<sup>1</sup>H NMR** (CDCl<sub>3</sub>, 500 MHz): δ 7.40 (d, *J* = 7.5 Hz, 2H), 7.34 (t, *J* = 7.5 Hz, 2H), 7.28 (d, *J* = 7.2 Hz, 1H), 6.70 (dd, *J* = 16.0, 3.3 Hz, 1H), 6.24 (ddd, *J* = 16.0, 13.3, 6.5 Hz, 1H), 5.40–5.11 (m, 1H), 3.75 (t, 4H), 2.79 (ddd, *J* = 18.3, 14.0, 8.0 Hz, 1H), 2.72–2.45 (m, 1H), 2.63–2.45 (m, 4H).

**<sup>13</sup>C NMR** (125 MHz, CDCl<sub>3</sub>) δ 135.9 (d, *J*<sub>C-F</sub> = 1.4 Hz), 133.1 (d, *J*<sub>C-F</sub> = 11.5 Hz), 128.7, 128.3, 126.7, 125.5 (d, *J*<sub>C-F</sub> = 18.4 Hz), 91.7 (d, *J*<sub>C-F</sub> = 170.0 Hz), 66.9, 63.1 (d, *J* = 22.6 Hz), 54.2.

**<sup>19</sup>F NMR** (CDCl<sub>3</sub>, 471 MHz): δ -174.38.

**FTIR** (thin film): cm<sup>-1</sup> 1635, 1451, 1279, 1117, 1010, 745, 695.

**HRMS** (ESI) *m/z*: [M+H]<sup>+</sup> Calcd for C<sub>14</sub>H<sub>19</sub>FNO<sup>+</sup> 236.1445; found: 236.1446.

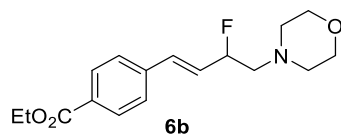

**Ethyl (*E*)-4-(3-fluoro-4-morpholinobut-1-en-1-yl)benzoate (6b).** Synthesized using **GP4** from **5b** and *O*-benzoylhydroxylmorpholine **2a**. Isolated by flash column chromatography (20% ethyl acetate–hexanes to 30% ethyl acetate–hexanes), as a yellowish oil (29.0 mg, 47%).

**R<sub>f</sub>** = 0.25 (50% ethyl acetate–hexanes).

**<sup>1</sup>H NMR** (CDCl<sub>3</sub>, 500 MHz): δ 8.00 (d, *J* = 8.1 Hz, 2H), 7.44 (d, *J* = 8.1 Hz, 2H), 6.73 (d, *J* = 16.0 Hz, 1H), 6.35 (ddd, *J* = 16.0, 13.4, 6.4 Hz, 1H), 5.41–5.19 (m, 1H), 4.37 (q, *J* = 7.1 Hz, 2H), 3.74 (t, *J* = 4.4 Hz, 4H), 2.79 (ddd, *J* = 18.7, 14.1, 7.9 Hz, 1H), 2.73–2.63 (m, 1H), 2.58–2.49 (m, 4H), 1.39 (t, *J* = 7.1 Hz, 3H).

**<sup>13</sup>C NMR** (125 MHz, CDCl<sub>3</sub>) δ 166.2, 140.2, 131.7 (d, *J*<sub>C-F</sub> = 11.8 Hz), 130.0, 129.9, 128.0 (d, *J*<sub>C-F</sub> = 18.4 Hz), 126.5, 91.3 (d, *J*<sub>C-F</sub> = 171.5 Hz), 66.9, 62.9 (d, *J*<sub>C-F</sub> = 22.2 Hz), 61.0, 54.1, 14.3.

**<sup>19</sup>F NMR** (CDCl<sub>3</sub>, 471 MHz): δ -176.56.

**FTIR** (thin film): cm<sup>-1</sup> 2958, 2854, 1711, 1607, 1453, 1272, 1106, 1018, 868, 762.

**HRMS** (ESI) *m/z*: [M+H]<sup>+</sup> Calcd for C<sub>17</sub>H<sub>23</sub>FNO<sub>3</sub><sup>+</sup> 308.1657; found: 308.1660.

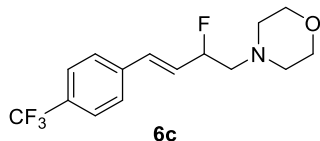

**(E)-4-(2-fluoro-4-(4-(trifluoromethyl)phenyl)but-3-en-1-yl)morpholine (6c).** Synthesized using **GP4** from **5c** and *O*-benzoylhydroxylmorpholine **2a**. Isolated by flash column chromatography (12% ethyl acetate–hexanes to 25% ethyl acetate–hexanes), as a yellowish oil (22.6 mg, 38%).

$R_f$  = 0.30 (50% ethyl acetate–hexanes).

$^1\text{H NMR}$  ( $\text{CDCl}_3$ , 500 MHz):  $\delta$  7.58 (d,  $J$  = 8.1 Hz, 2H), 7.48 (d,  $J$  = 8.1 Hz, 2H), 6.73 (dd,  $J$  = 16.0, 1.9 Hz, 1H), 6.34 (ddd,  $J$  = 18.8, 15.4, 5.9 Hz, 1H), 5.45–5.10 (m, 1H), 3.75 (t,  $J$  = 4.5 Hz, 4H), 2.79 (ddd,  $J$  = 18.8, 14.0, 7.8 Hz, 1H), 2.71–2.61 (m, 1H), 2.64–2.56 (m, 4H).

$^{13}\text{C NMR}$  (125 MHz,  $\text{CDCl}_3$ )  $\delta$  139.5, 131.2 (d,  $J_{\text{C-F}}$  = 11.9 Hz), 130.0 (q,  $J_{\text{C-F}}$  = 32.7 Hz), 128.3 (d,  $J_{\text{C-F}}$  = 18.4 Hz), 126.8, 125.6 (q,  $J_{\text{C-F}}$  = 3.7 Hz), 124.1 (q,  $J_{\text{C-F}}$  = 271.9 Hz), 91.2 (d,  $J_{\text{C-F}}$  = 171.7 Hz), 66.9, 62.9 (d,  $J_{\text{C-F}}$  = 22.2 Hz), 54.1.

$^{19}\text{F NMR}$  ( $\text{CDCl}_3$ , 471 MHz):  $\delta$  -62.61, -176.98.

**FTIR** (thin film):  $\text{cm}^{-1}$  2856, 2814, 1616, 1454, 1323, 1164, 1115, 1066, 1015, 868.

**HRMS** (ESI)  $m/z$ :  $[\text{M}+\text{H}]^+$  Calcd for  $\text{C}_{15}\text{H}_{18}\text{F}_4\text{NO}^+$  304.1319; found: 304.1321.

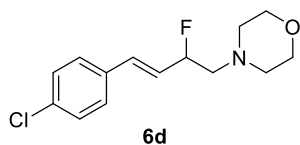

**(E)-4-(4-(4-chlorophenyl)-2-fluorobut-3-en-1-yl)morpholine (6d).** Synthesized using **GP4** from **5d** and *O*-benzoylhydroxylmorpholine **2a**. Isolated by flash column chromatography (10% ethyl acetate–hexanes to 25% ethyl acetate–hexanes), as a yellowish oil (26.3 mg, 49%).

$R_f$  = 0.21 (30% ethyl acetate–hexanes).

$^1\text{H NMR}$  ( $\text{CDCl}_3$ , 500 MHz):  $\delta$  7.32 (d,  $J$  = 8.4 Hz, 2H), 7.30 (d,  $J$  = 8.4 Hz, 2H), 6.65 (dd,  $J$  = 16.0, 2.6 Hz, 1H), 6.22 (ddd,  $J$  = 16.0, 13.7, 6.3 Hz, 1H), 5.37–5.03 (m, 1H), 3.74 (t,  $J$  = 4.6 Hz, 4H), 2.78 (ddd,  $J$  = 18.5, 14.0, 7.9 Hz, 1H), 2.69–2.59 (m, 1H), 2.63–2.53 (m, 4H).

$^{13}\text{C NMR}$  (125 MHz,  $\text{CDCl}_3$ )  $\delta$  134.5, 134.0, 131.7 (d,  $J_{\text{C-F}}$  = 11.8 Hz), 128.9, 127.9, 126.2 (d,  $J_{\text{C-F}}$  = 18.4 Hz), 91.5 (d,  $J_{\text{C-F}}$  = 170.7 Hz), 66.9, 63.0 (d,  $J_{\text{C-F}}$  = 22.2 Hz), 54.2.

$^{19}\text{F NMR}$  ( $\text{CDCl}_3$ , 471 MHz):  $\delta$  -175.22.

**FTIR** (thin film):  $\text{cm}^{-1}$  2855, 2811, 1491, 1453, 1115, 1089, 1011, 968, 869, 719.

**HRMS** (ESI)  $m/z$ :  $[\text{M}+\text{H}]^+$  Calcd for  $\text{C}_{14}\text{H}_{18}\text{ClFNO}^+$  270.1056; found: 270.1055.

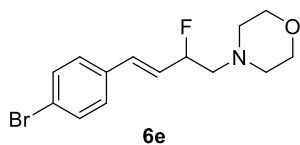

**(E)-4-(4-(4-bromophenyl)-2-fluorobut-3-en-1-yl)morpholine (6e).** Synthesized using **GP4** from **5e** and *O*-benzoylhydroxylmorpholine **2a**. Isolated by flash column chromatography (10% ethyl acetate–hexanes to 25% ethyl acetate–hexanes), as a yellowish solid (30.4 mg, 48%).

$R_f$  = 0.22 (30% ethyl acetate–hexanes).

$^1\text{H NMR}$  ( $\text{CDCl}_3$ , 500 MHz):  $\delta$  7.45 (d,  $J$  = 8.1 Hz, 2H), 7.25 (d,  $J$  = 8.1 Hz, 2H), 6.63 (dd,  $J$  = 16.0, 2.9 Hz, 1H), 6.23 (ddd,  $J$  = 16.0, 13.9, 6.3 Hz, 1H), 5.36–5.09 (m, 1H), 3.74 (t,  $J$  = 4.5 Hz, 4H), 2.77 (ddd,  $J$  = 18.5, 14.0, 7.9 Hz, 1H), 2.67–2.58 (m, 1H), 2.64–2.39 (m, 4H).

$^{13}\text{C}$  NMR (125 MHz,  $\text{CDCl}_3$ )  $\delta$  134.9, 131.8, 131.7 (d,  $J_{\text{C-F}} = 12.0$  Hz), 128.2, 126.3 (d,  $J_{\text{C-F}} = 18.4$  Hz), 122.1, 91.5 (d,  $J_{\text{C-F}} = 170.8$  Hz), 66.9, 63.0 (d,  $J_{\text{C-F}} = 22.5$  Hz), 54.2.

$^{19}\text{F}$  NMR ( $\text{CDCl}_3$ , 471 MHz):  $\delta$  -175.42.

FTIR (thin film):  $\text{cm}^{-1}$  2957, 2854, 1487, 1453, 1115, 1071, 1008, 967, 868, 712.

HRMS (ESI)  $m/z$ :  $[\text{M}+\text{H}]^+$  Calcd for  $\text{C}_{14}\text{H}_{18}\text{BrFNO}^+$  314.0550; found: 314.0550.

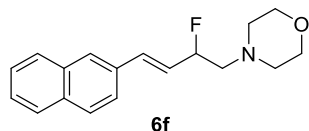

**(E)-4-(2-Fluoro-4-(naphthalen-2-yl)but-3-en-1-yl)morpholine (6f).** Synthesized using **GP4** from **5f** and *O*-benzoylhydroxylmorpholine **2a**. Isolated by flash column chromatography (12% ethyl acetate–hexanes to 20% ethyl acetate–hexanes), as a yellowish oil (18.4 mg, 33%).

$R_f = 0.20$  (30% ethyl acetate–hexanes).

$^1\text{H}$  NMR ( $\text{CDCl}_3$ , 500 MHz):  $\delta$  7.85–7.78 (m, 3H), 7.76 (s, 1H), 7.59 (d,  $J = 8.5$  Hz, 1H), 7.51–7.43 (m, 2H), 6.88 (dd,  $J = 15.9, 3.0$  Hz, 1H), 6.36 (ddd,  $J = 15.9, 13.5, 6.4$  Hz, 1H), 5.56–5.26 (m, 1H), 3.80 (t,  $J = 4.4$  Hz, 4H), 2.87 (ddd,  $J = 18.1, 14.1, 8.0$  Hz, 1H), 2.8–2.69 (m, 1H), 2.76–2.60 (m, 4H).

$^{13}\text{C}$  NMR (125 MHz,  $\text{CDCl}_3$ )  $\delta$  133.5, 133.4 (d,  $J_{\text{C-F}} = 11.6$  Hz), 133.3, 133.3, 128.4, 128.1, 127.7, 127.2, 126.4, 126.3, 125.4 (d,  $J_{\text{C-F}} = 18.9$  Hz), 123.4, 91.5 (d,  $J_{\text{C-F}} = 170.2$  Hz), 66.6, 62.9 (d,  $J_{\text{C-F}} = 22.4$  Hz), 54.0.

$^{19}\text{F}$  NMR ( $\text{CDCl}_3$ , 471 MHz):  $\delta$  -174.02.

FTIR (thin film):  $\text{cm}^{-1}$  2924, 2853, 1716, 1596, 1452, 1271, 1115, 1009, 966, 867, 746.

HRMS (ESI)  $m/z$ :  $[\text{M}+\text{H}]^+$  Calcd for  $\text{C}_{18}\text{H}_{21}\text{FNO}^+$  286.1602; found: 286.1600.

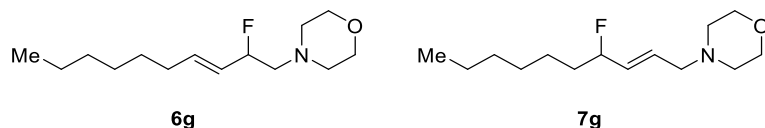

**(E)-4-(2-fluorodec-3-en-1-yl)morpholine (6g)** and **(E)-4-(4-fluorodec-2-en-1-yl)morpholine (7g).** Synthesized using **GP4** from **5g** and *O*-benzoylhydroxylmorpholine **2a**.  $^1\text{H}$ -NMR analysis of the crude reaction mixture indicated the formation of 1,2-product **6g** and 1,4-product **7g** in a ratio of 7:1.

1,2-Product **6g** was isolated by flash column chromatography (5% ethyl acetate–hexanes to 10% ethyl acetate–hexanes) as a yellowish oil (17.1 mg, 35%).

$R_f = 0.20$  (13% ethyl acetate–hexanes).

$^1\text{H}$  NMR ( $\text{CDCl}_3$ , 500 MHz):  $\delta$  5.89–5.75 (m, 1H), 5.61–5.45 (m, 1H), 5.05 (dt,  $J = 14.8, 6.5$  Hz, 1H), 3.82–3.65 (t,  $J = 4.6, 4\text{H}$ ), 2.69 (ddd,  $J = 17.7, 14.0, 8.2$  Hz, 1H), 2.61–2.51 (m, 4H), 2.57–2.41 (m, 1H), 2.11–2.00 (m, 2H), 1.44–1.33 (m, 2H), 1.3–1.18 (m, 6H), 0.88 (t,  $J = 6.9$  Hz, 3H).

$^{13}\text{C}$  NMR (125 MHz,  $\text{CDCl}_3$ )  $\delta$  136.3 (d,  $J_{\text{C-F}} = 11.1$  Hz), 126.4 (d,  $J_{\text{C-F}} = 18.7$  Hz), 91.9 (d,  $J_{\text{C-F}} = 167.3$  Hz), 66.9, 63.2 (d,  $J_{\text{C-F}} = 22.8$  Hz), 54.1, 32.2 (d,  $J_{\text{C-F}} = 1.2$  Hz), 31.7, 28.8 (d,  $J_{\text{C-F}} = 2.5$  Hz), 22.6, 14.1.

$^{19}\text{F}$  NMR ( $\text{CDCl}_3$ , 471 MHz):  $\delta$  -171.31.

FTIR (thin film):  $\text{cm}^{-1}$  2925, 2854, 1672, 1454, 1294, 1119, 1009, 968, 869.

HRMS (ESI)  $m/z$ :  $[\text{M}+\text{H}]^+$  Calcd for  $\text{C}_{14}\text{H}_{27}\text{FNO}^+$  244.2071; found: 244.2073.

1,4-Product **7g** was isolated by flash column chromatography (10% ethyl acetate–hexanes to 25% ethyl acetate–hexanes) as a yellowish oil (3.4 mg, 7%).

$R_f = 0.15$  (20% ethyl acetate–hexanes).

$^1\text{H}$  NMR ( $\text{CDCl}_3$ , 500 MHz):  $\delta$  5.82–5.75 (m, 1H), 5.74–5.65 (m, 1H), 4.86 (ddd,  $J = 48.8, 12.8, 6.3$  Hz,

1H), 3.72 (t,  $J = 4.6$  Hz, 4H), 3.01 (dd,  $J = 5.8, 3.6$  Hz, 2H), 2.54–2.30 (m, 4H), 1.77–1.67 (m, 1H), 1.64–1.57 (m, 1H), 1.37–1.24 (m, 8H), 0.88 (t,  $J = 6.8$  Hz, 3H).

$^{13}\text{C}$  NMR (125 MHz,  $\text{CDCl}_3$ )  $\delta$  132.6 (d,  $J_{\text{C-F}} = 20.4$  Hz), 129.6 (d,  $J_{\text{C-F}} = 10.5$  Hz), 93.2 (d,  $J_{\text{C-F}} = 165.2$  Hz), 66.9, 60.5, 53.5, 35.4 (d,  $J_{\text{C-F}} = 22.5$  Hz), 31.7, 29.0, 24.7 (d,  $J_{\text{C-F}} = 4.5$  Hz), 22.5, 14.1.

$^{19}\text{F}$  NMR ( $\text{CDCl}_3$ , 471 MHz):  $\delta$  -172.83.

FTIR (thin film):  $\text{cm}^{-1}$  2927, 2855, 1677, 1454, 1118, 1004, 974, 867.

HRMS (ESI)  $m/z$ :  $[\text{M}+\text{H}]^+$  Calcd for  $\text{C}_{14}\text{H}_{27}\text{FNO}^+$  244.2071; found: 244.2073.

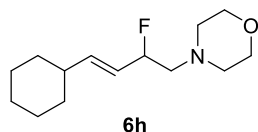

6h

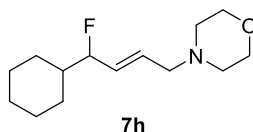

7h

**(E)-4-(4-Cyclohexyl-2-fluorobut-3-en-1-yl)morpholine (6h) and (E)-4-(4-Cyclohexyl-4-fluorobut-2-en-1-yl)morpholine (7h).** Synthesized using **GP4** from **5h** and *O*-benzoylhydroxymorpholine **2a**.  $^1\text{H}$ -NMR analysis of the crude reaction mixture indicated the formation of 1,2-product **6h** and 1,4-product **7h** in a ratio of 8:1.

1,2-Product **6h** was isolated by flash column chromatography (5% ethyl acetate–hexanes to 10% ethyl acetate–hexanes) as a yellowish oil (21.4 mg, 44%).

$R_f = 0.20$  (10% ethyl acetate–hexanes).

$^1\text{H}$  NMR ( $\text{CDCl}_3$ , 500 MHz):  $\delta$  5.76 (ddd,  $J = 15.5, 6.0, 4.5$  Hz, 1H), 5.47 (dddd,  $J = 15.6, 11.0, 7.1, 1.3$  Hz, 1H), 5.15–4.80 (m, 1H), 3.73 (t,  $J = 4.5$  Hz, 4H), 2.69 (ddd,  $J = 17.6, 14.0, 8.3$  Hz, 1H), 2.55 (t,  $J = 4.5$  Hz, 4H), 2.48 (ddd,  $J = 31.9, 14.0, 2.7$  Hz, 1H), 2.10–1.87 (m, 1H), 1.80–1.59 (m, 5H), 1.34–1.21 (m, 2H), 1.20–1.12 (m, 1H), 1.12–1.01 (m, 2H).

$^{13}\text{C}$  NMR (125 MHz,  $\text{CDCl}_3$ )  $\delta$  141.6 (d,  $J = 10.8$  Hz), 123.9 (d,  $J_{\text{C-F}} = 19.0$  Hz), 92.1 (d,  $J_{\text{C-F}} = 167.4$  Hz), 66.9, 63.3 (d,  $J_{\text{C-F}} = 22.8$  Hz), 54.1, 40.3, 32.5 (d,  $J_{\text{C-F}} = 1.8$  Hz), 32.4 (d,  $J_{\text{C-F}} = 1.8$  Hz), 26.1, 25.9.

$^{19}\text{F}$  NMR ( $\text{CDCl}_3$ , 471 MHz):  $\delta$  -171.47.

FTIR (thin film):  $\text{cm}^{-1}$  2923, 2851, 2810, 1620, 1450, 1293, 1140, 1118, 1009, 969, 869.

HRMS (ESI)  $m/z$ :  $[\text{M}+\text{H}]^+$  Calcd for  $\text{C}_{14}\text{H}_{25}\text{FNO}^+$  242.1915; found: 242.1915.

1,4-Product **7h** was isolated by flash column chromatography (10% ethyl acetate–hexanes to 25% ethyl acetate–hexanes) as a yellowish oil (2.4 mg, 5%).

$R_f = 0.10$  (20% ethyl acetate–hexanes).

$^1\text{H}$  NMR ( $\text{CDCl}_3$ , 500 MHz):  $\delta$  5.85–5.57 (m, 2H), 4.58 (dt,  $J = 48.5, 6.6$  Hz, 1H), 3.72 (t,  $J = 4.6$  Hz, 4H), 3.11–2.85 (m, 2H), 2.44 (s, 4H), 1.86 (d,  $J = 12.8$  Hz, 1H), 1.81–1.72 (m, 2H), 1.67 (d,  $J = 12.2$  Hz, 1H), 1.60–1.49 (m, 1H), 1.30–1.09 (m, 4H), 1.07–0.94 (m, 2H).

$^{13}\text{C}$  NMR (125 MHz,  $\text{CDCl}_3$ )  $\delta$  131.1 (d,  $J = 20.3$  Hz), 130.7 (d,  $J = 12.2$  Hz), 97.2 (d,  $J = 167.7$  Hz), 66.9, 60.6, 53.5, 42.3 (d,  $J = 21.1$  Hz), 28.2 (d,  $J = 4.5$  Hz), 27.9 (d,  $J = 5.1$  Hz), 26.3, 25.8, 25.7.

$^{19}\text{F}$  NMR ( $\text{CDCl}_3$ , 471 MHz):  $\delta$  -178.48.

FTIR (thin film):  $\text{cm}^{-1}$  2923, 2851, 1718, 1450, 1269, 1117, 1069, 969, 869.

HRMS (ESI)  $m/z$ :  $[\text{M}+\text{H}]^+$  Calcd for  $\text{C}_{14}\text{H}_{25}\text{FNO}^+$  242.1915; found: 242.1914.

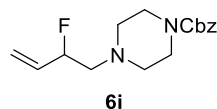

6i

**Benzyl 4-(2-fluorobut-3-en-1-yl)piperazine-1-carboxylate (6i).** Synthesized using **GP4** from **5i** and *O*-benzoyl-4-benzoyloxycarbonyl-hydroxypiperazine **2i**. Isolated by flash column chromatography (12% ethyl acetate–hexanes to 25% ethyl acetate–hexanes), as a colorless oil (30.0 mg, 51%).

$R_f$  = 0.50 (50% ethyl acetate–hexanes).

$^1\text{H NMR}$  ( $\text{CDCl}_3$ , 500 MHz):  $\delta$  7.44–7.29 (m, 5H), 5.99–5.77 (m, 1H), 5.44–5.32 (m, 1H), 5.27 (d,  $J$  = 10.7 Hz, 1H), 5.13 (s, 2H), 5.16–5.00 (m, 1H), 3.66–3.47 (m, 4H), 2.70 (ddd,  $J$  = 18.7, 14.2, 8.0 Hz, 1H), 2.61–2.50 (m, 1H), 2.58–2.41 (m, 4H).

$^{13}\text{C NMR}$  (125 MHz,  $\text{CDCl}_3$ )  $\delta$  155.2, 136.7, 134.6 (d,  $J_{\text{C-F}}$  = 19.3 Hz), 128.5, 128.0, 127.9, 117.6 (d,  $J_{\text{C-F}}$  = 11.8 Hz), 91.6 (d,  $J_{\text{C-F}}$  = 170.9 Hz), 67.1, 62.4 (d,  $J_{\text{C-F}}$  = 21.9 Hz), 53.3, 43.8.

$^{19}\text{F NMR}$  ( $\text{CDCl}_3$ , 471 MHz):  $\delta$  -178.96.

**FTIR** (thin film):  $\text{cm}^{-1}$  2924, 2814, 1696, 1426, 1234, 1121, 1001, 933, 696.

**HRMS** (ESI)  $m/z$ :  $[\text{M}+\text{H}]^+$  Calcd for  $\text{C}_{16}\text{H}_{22}\text{FN}_2\text{O}_2^+$  293.1660; found: 293.1662.

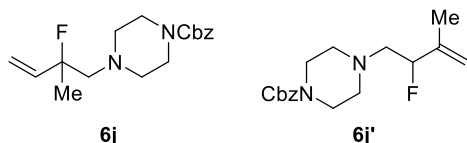

**Benzyl 4-(2-fluoro-2-methylbut-3-en-1-yl)piperazine-1-carboxylate (6j) and benzyl 4-(2-fluoro-3-methylbut-3-en-1-yl)piperazine-1-carboxylate (6j')**. Synthesized using **GP4** from **5j** and *O*-benzoyl-4-benzyloxycarbonyl-hydroxypiperazine **2j**.  $^1\text{H-NMR}$  analysis of the crude reaction mixture indicated the formation of two 1,2-products **6j** and **6j'** in a ratio of 10:1.

1,2-Product **6j** was isolated by flash column chromatography (2.5% 1,4-dioxane–hexanes), as a colorless oil (27.5 mg, 45%).

$R_f$  = 0.10 (10% 1,4-dioxane–hexanes).

$^1\text{H NMR}$  ( $\text{CDCl}_3$ , 500 MHz):  $\delta$  7.45–7.21 (m, 5H), 5.94 (td,  $J$  = 17.6, 11.0 Hz, 1H), 5.30 (d,  $J$  = 17.4 Hz, 1H), 5.15 (d,  $J$  = 11.1 Hz, 1H), 5.13 (s, 2H), 3.49 (t,  $J$  = 5.0 Hz, 4H), 2.59–2.33 (m, 2H), 2.59–2.33 (m, 4H), 1.44 (d,  $J$  = 21.6 Hz, 3H).

$^{13}\text{C NMR}$  (125 MHz,  $\text{CDCl}_3$ )  $\delta$  155.3, 139.7 (d,  $J_{\text{C-F}}$  = 22.2 Hz), 136.8, 128.5, 128.0, 127.9, 114.0 (d,  $J_{\text{C-F}}$  = 11.1 Hz), 96.8 (d,  $J_{\text{C-F}}$  = 171.4 Hz), 67.1, 65.7 (d,  $J_{\text{C-F}}$  = 22.3 Hz), 54.1, 54.1, 43.9, 23.4 (d,  $J_{\text{C-F}}$  = 24.8 Hz).

$^{19}\text{F NMR}$  ( $\text{CDCl}_3$ , 471 MHz):  $\delta$  -147.99.

**FTIR** (thin film):  $\text{cm}^{-1}$  2926, 2858, 2810, 1698, 1427, 1362, 1242, 1123, 1007, 920, 752.

**HRMS** (ESI)  $m/z$ :  $[\text{M}+\text{H}]^+$  Calcd for  $\text{C}_{17}\text{H}_{24}\text{FN}_2\text{O}_2^+$  307.1816; found: 307.1816.

Minor product **6j'** was unable to be obtained as a pure product.

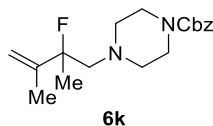

**Benzyl 4-(2-fluoro-2,3-dimethylbut-3-en-1-yl)piperazine-1-carboxylate (6k)**. Synthesized using **GP4** from **5k** and *O*-benzoyl-4-benzyloxycarbonyl-hydroxypiperazine **2j**. Isolated by flash column chromatography (2.5% 1,4-dioxane–hexanes to 3.3% 1,4-dioxane–hexanes), as a colorless oil (27.0 mg, 42%).

$R_f$  = 0.15 (10% 1,4-dioxane–hexanes).

$^1\text{H NMR}$  ( $\text{CDCl}_3$ , 500 MHz):  $\delta$  7.46–7.26 (m, 5H), 5.13 (s, 2H), 5.01 (s, 1H), 4.89 (s, 1H), 3.51 (s, 4H), 2.82–2.34 (m, 2H), 2.82–2.34 (m, 4H), 1.77 (s, 3H), 1.46 (d,  $J$  = 22.2 Hz, 3H).

$^{13}\text{C NMR}$  (125 MHz,  $\text{CDCl}_3$ )  $\delta$  155.2, 146.3 (d,  $J_{\text{C-F}}$  = 19.9 Hz), 136.8, 128.5, 128.0, 127.9, 110.7 (d,  $J_{\text{C-F}}$  = 11.4 Hz), 99.0 (d,  $J_{\text{C-F}}$  = 174.4 Hz), 67.1, 64.4 (d,  $J_{\text{C-F}}$  = 22.1 Hz), 54.0 (d,  $J_{\text{C-F}}$  = 2.0 Hz), 43.7, 23.2 (d,  $J_{\text{C-F}}$  = 25.4 Hz), 19.3 (d,  $J_{\text{C-F}}$  = 5.5 Hz).

$^{19}\text{F NMR}$  ( $\text{CDCl}_3$ , 471 MHz):  $\delta$  -146.45.



**FTIR** (thin film):  $\text{cm}^{-1}$  2938, 2861, 2810, 1698, 1427, 1237, 1119, 1094, 1008, 905, 734.  
**HRMS** (ESI)  $m/z$ :  $[\text{M}+\text{H}]^+$  Calcd for  $\text{C}_{18}\text{H}_{26}\text{FN}_2\text{O}_2^+$  321.1973; found: 321.1973.

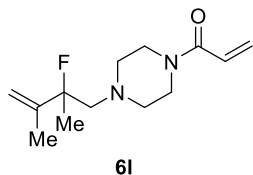

**1-(4-(2-Fluoro-2,3-dimethylbut-3-en-1-yl)piperazin-1-yl)prop-2-en-1-one (6l).** Synthesized using **GP4** from **5k** and 4-acryloylpiperazin-1-yl benzoate **2u**. Isolated by flash column chromatography (10% ethyl acetate–hexanes to 20% ethyl acetate–hexanes), as a pale oil (21.2 mg, 44%).

$R_f$  = 0.35 (25% ethyl acetate–hexanes).

$^1\text{H}$  NMR ( $\text{CDCl}_3$ , 500 MHz):  $\delta$  6.54 (dd,  $J$  = 16.8, 10.6 Hz, 1H), 6.27 (dd,  $J$  = 16.8, 1.9 Hz, 1H), 5.67 (dd,  $J$  = 10.6, 1.9 Hz, 1H), 5.00 (s, 1H), 4.88 (dd,  $J$  = 2.3, 1.5 Hz, 1H), 3.59 (d,  $J$  = 71.1 Hz, 4H), 2.76–2.37 (m, 2H), 2.76–2.37 (m, 4H), 1.77 (s, 3H), 1.45 (d,  $J$  = 22.2 Hz, 3H).

$^{13}\text{C}$  NMR (125 MHz,  $\text{CDCl}_3$ )  $\delta$  165.3, 146.4 (d,  $J_{\text{C-F}}$  = 20.1 Hz), 127.7, 127.5, 110.5 (d,  $J_{\text{C-F}}$  = 11.4 Hz), 99.2 (d,  $J_{\text{C-F}}$  = 174.1 Hz), 64.4 (d,  $J_{\text{C-F}}$  = 22.0 Hz), 54.3 (d,  $J_{\text{C-F}}$  = 41.0 Hz), 45.9, 42.1, 23.3 (d,  $J_{\text{C-F}}$  = 25.6 Hz), 19.3 (d,  $J_{\text{C-F}}$  = 5.4 Hz).

$^{19}\text{F}$  NMR ( $\text{CDCl}_3$ , 471 MHz):  $\delta$  -146.57.

**FTIR** (thin film):  $\text{cm}^{-1}$  2982, 2924, 2809, 1648, 1613, 1439, 1238, 1129, 1007, 905, 791.

**HRMS** (ESI)  $m/z$ :  $[\text{M}+\text{H}]^+$  Calcd for  $\text{C}_{13}\text{H}_{22}\text{FN}_2\text{O}^+$  241.1711; found: 241.1707.

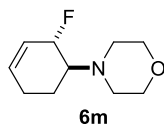

**trans-4-(2-Fluorocyclohex-3-en-1-yl)morpholine (6m).** Synthesized using **GP4** from **5m** and *O*-benzoylhydroxymorpholine **2a**. Only *trans*-isomer was observed (dr >20:1) by  $^1\text{H}$ -NMR analysis of the crude reaction mixture. Isolated by flash column chromatography (12% ethyl acetate–hexanes to 25% ethyl acetate–hexanes), as a colorless oil (16.5 mg, 45%).

$R_f$  = 0.20 (50% ethyl acetate–hexanes).

$^1\text{H}$  NMR ( $\text{CDCl}_3$ , 500 MHz):  $\delta$  5.87 (dd,  $J$  = 9.7, 2.5 Hz, 1H), 5.76–5.64 (m, 1H), 5.28–5.11 (m, 1H), 3.73 (t,  $J$  = 4.5 Hz, 4H), 2.81–2.57 (m, 1H), 2.81–2.57 (m, 4H), 2.23–2.09 (m, 2H), 1.92 (dd,  $J$  = 8.9, 4.5 Hz, 1H), 1.59–1.47 (m, 1H).

$^{13}\text{C}$  NMR (125 MHz,  $\text{CDCl}_3$ )  $\delta$  131.5 (d,  $J_{\text{C-F}}$  = 9.5 Hz), 126.3 (d,  $J_{\text{C-F}}$  = 21.6 Hz), 88.7 (d,  $J_{\text{C-F}}$  = 166.2 Hz), 67.5, 64.4 (d,  $J_{\text{C-F}}$  = 16.1 Hz), 49.9, 25.4 (d,  $J_{\text{C-F}}$  = 2.9 Hz), 23.1 (d,  $J_{\text{C-F}}$  = 7.4 Hz).

$^{19}\text{F}$  NMR ( $\text{CDCl}_3$ , 471 MHz):  $\delta$  -172.49.

**FTIR** (thin film):  $\text{cm}^{-1}$  2924, 2852, 1717, 1451, 1268, 1116, 1015, 901, 854, 732.

**HRMS** (ESI)  $m/z$ :  $[\text{M}+\text{H}]^+$  Calcd for  $\text{C}_{10}\text{H}_{17}\text{FNO}^+$  186.1289; found: 186.1287.

## 7. Synthetic applications

### 7.1. Transformations of $\beta$ -fluoro homoallylic amines to alkyl-substituted $\beta$ -fluoroalkylamines

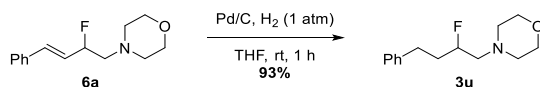

**4-(2-Fluoro-4-phenylbutyl)morpholine (3u).** To a stirring solution of (*E*)-4-(2-fluoro-4-phenylbut-3-en-1-yl)morpholine **6a** (23.5 mg, 0.1 mmol, 1 equiv) in THF (2.0 mL) was added Pd/C (10% on activated carbon, 4 mg) at room temperature. After the inner atmosphere of the flask was changed to hydrogen by a hydrogen balloon (1atm), the resulting mixture was allowed to stir at room temperature for 1 h. Upon the completion consumption of **6a** (monitored by LC-MS analysis), the reaction was stopped immediately and filtered. The solvent was removed under reduced pressure. The resulting residue was purified by silica gel chromatography (40% ethyl acetate–hexanes), giving **3u** as yellow oil (22.1 mg, 93%).

$R_f$  = 0.10 (33% ethyl acetate–hexanes).

$^1\text{H NMR}$  ( $\text{CDCl}_3$ , 500 MHz):  $\delta$  7.32–7.27 (m, 2H), 7.23–7.18 (m, 3H), 4.81–4.52 (m, 1H), 3.75–3.58 (m, 4H), 2.88–2.78 (m, 1H), 2.75–2.68 (m, 1H), 2.68–2.58 (m, 1H), 2.55–2.41 (m, 5H), 2.07–1.95 (m, 1H), 1.95–1.78 (m, 1H).

$^{13}\text{C NMR}$  ( $\text{CDCl}_3$ , 125 MHz):  $\delta$  141.2, 128.5, 128.8, 126.1, 91.5 (d,  $J_{\text{C-F}}$  = 170.0 Hz), 66.9, 62.8 (d,  $J_{\text{C-F}}$  = 20.5 Hz), 54.3, 35.2 (d,  $J_{\text{C-F}}$  = 20.8 Hz), 31.2 (d,  $J_{\text{C-F}}$  = 4.6 Hz).

$^{19}\text{F NMR}$  ( $\text{CDCl}_3$ , 471 MHz):  $\delta$  -182.13.

**FTIR** (thin film):  $\text{cm}^{-1}$  2952, 2853, 1717, 1453, 1273, 1116, 1035, 867, 699.

**HRMS** (ESI)  $m/z$ :  $[\text{M}+\text{H}]^+$  Calcd for  $\text{C}_{14}\text{H}_{21}\text{FNO}^+$  238.1602; found: 238.1600.

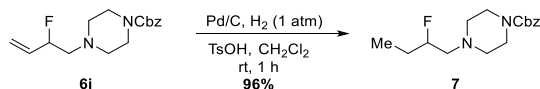

**Benzyl 4-(2-fluorobutyl)piperazine-1-carboxylate (7).** To a stirring solution of benzyl 4-(2-fluorobut-3-en-1-yl)piperazine-1-carboxylate **6i** (29.2 mg, 0.1 mmol, 1 equiv) in  $\text{CH}_2\text{Cl}_2$  (2.0 mL) was added Pd/C (10% on activated carbon, 4 mg) and  $\text{TsOH}\cdot\text{H}_2\text{O}$  (19 mg, 0.1 mmol, 1.0 equiv) at room temperature. After the inner atmosphere of the flask was changed to hydrogen by a hydrogen balloon (1atm), the resulting mixture was allowed to stir at room temperature for 1 h. Upon the completion consumption of **6i** (monitored by LC-MS analysis), the reaction was stopped immediately and filtered through a plug of activated, neutral  $\text{Al}_2\text{O}_3$  (Brockman grade I, 58–60Å). The solvent was removed under reduced pressure. The resulting residue was purified by silica gel chromatography (30% ethyl acetate–hexanes), giving **7** as yellow oil (28.2 mg, 96%).

$R_f$  = 0.15 (20% ethyl acetate–hexanes).

$^1\text{H NMR}$  ( $\text{CDCl}_3$ , 500 MHz):  $\delta$  7.50–7.26 (m, 5H), 5.13 (s, 2H), 4.59 (dtdd,  $J$  = 50.0, 7.5, 5.0, 2.6 Hz, 1H), 3.53 (t,  $J$  = 4.5 Hz, 4H), 2.62 (ddd,  $J$  = 19.1, 14.0, 7.6 Hz, 1H), 2.55–2.33 (m, 1H), 2.55–2.33 (m, 4H), 1.77–1.47 (m, 2H), 0.98 (t,  $J$  = 7.5 Hz, 3H).

$^{13}\text{C NMR}$  ( $\text{CDCl}_3$ , 125 MHz):  $\delta$  155.2, 136.8, 128.5, 128.0, 127.9, 93.6 (d,  $J_{\text{C-F}}$  = 170.0 Hz), 67.1, 62.1 (d,  $J_{\text{C-F}}$  = 20.8 Hz), 53.5, 43.8, 26.6 (d,  $J_{\text{C-F}}$  = 21.3 Hz), 9.3 (d,  $J_{\text{C-F}}$  = 6.1 Hz).

$^{19}\text{F NMR}$  ( $\text{CDCl}_3$ , 471 MHz):  $\delta$  -181.26.

**FTIR** (thin film):  $\text{cm}^{-1}$  2935, 2812, 1697, 1426, 1233, 1119, 997, 854, 763, 697.

**HRMS** (ESI)  $m/z$ :  $[\text{M}+\text{H}]^+$  Calcd for  $\text{C}_{16}\text{H}_{24}\text{FN}_2\text{O}_2^+$  295.1916; found: 295.1816.

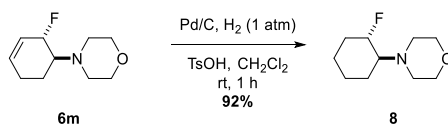

**4-(2-Fluorocyclohexyl)morpholine (8).** To a stirring solution of 4-(2-fluorocyclohex-3-en-1-

yl)morpholine **6m** (18.5 mg, 0.1 mmol, 1 equiv) in CH<sub>2</sub>Cl<sub>2</sub> (2.0 mL) was added Pd/C (10% on activated carbon, 4 mg) and TsOH·H<sub>2</sub>O (19 mg, 0.1 mmol, 1.0 equiv) at room temperature. After the inner atmosphere of the flask was changed to hydrogen by a hydrogen balloon (1atm), the resulting mixture was allowed to stir at room temperature for 1 h. Upon the completion consumption of **6m** (monitored by LC-MS analysis), the reaction was stopped immediately and filtered through a plug of activated, neutral Al<sub>2</sub>O<sub>3</sub> (Brockman grade I, 58–60Å). The solvent was removed under reduced pressure. The resulting residue was purified by silica gel chromatography (50% ethyl acetate–hexanes), giving **8** as yellow oil (17.2 mg, 92%).

**R<sub>f</sub>** = 0.20 (50% ethyl acetate–hexanes).

**<sup>1</sup>H NMR** (CDCl<sub>3</sub>, 500 MHz): δ 4.52 (dtd, *J* = 50.3, 10.1, 4.8 Hz, 1H), 3.71 (t, *J* = 4.4 Hz, 4H), 2.69 (t, *J* = 4.4 Hz, 4H), 2.50 (dddd, 13.6 Hz, 11.3 Hz, 4.8 Hz, 2.2 Hz, 1H), 2.20–2.00 (m, 1H), 1.95–1.81 (m, 1H), 1.78–1.65 (m, 2H), 1.53–1.38 (m, 1H), 1.33–1.12 (m, 1H), 1.33–1.12 (m, 2H).

**<sup>13</sup>C NMR** (CDCl<sub>3</sub>, 125 MHz): δ 92.0 (d, *J<sub>C-F</sub>* = 177.3 Hz), 67.7, 67.2 (d, *J<sub>C-F</sub>* = 15.3 Hz), 49.8, 32.3 (d, *J<sub>C-F</sub>* = 18.0 Hz), 26.1 (d, *J<sub>C-F</sub>* = 8.3 Hz), 24.7 (d, *J<sub>C-F</sub>* = 1.8 Hz), 23.8 (d, *J<sub>C-F</sub>* = 11.2 Hz).

**<sup>19</sup>F NMR** (CDCl<sub>3</sub>, 471 MHz): δ -174.21.

**FTIR** (thin film): cm<sup>-1</sup> 2933, 2854, 1451, 1266, 1116, 1012, 940, 868, 848, 665.

**HRMS** (ESI) *m/z*: [M+H]<sup>+</sup> Calcd for C<sub>10</sub>H<sub>19</sub>FNO<sup>+</sup> 188.1445; found: 188.1444.

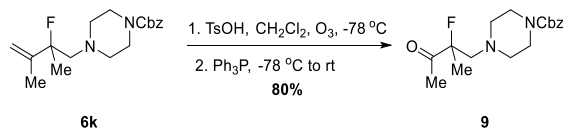

**Benzyl 4-(2-fluoro-2-methyl-3-oxobutyl)piperazine-1-carboxylate (9)**. A solution of benzyl 4-(2-fluoro-2,3-dimethylbut-3-en-1-yl)piperazine-1-carboxylate **6k** (32.0 mg, 0.10 mmol, 1.0 equiv) and TsOH·H<sub>2</sub>O (28.5 mg, 0.15 mmol, 1.5 equiv) in CH<sub>2</sub>Cl<sub>2</sub> was cooled to -78 °C. Ozone was then bubbled through until the solution turned light blue after 10 min. Then triphenylphosphine (39.3, 0.15 mmol, 1.5 equiv) was added. The reaction mixture was allowed to slowly warm up to room temperature and to stir for another 8 h. To the reaction mixture was added water (4 mL) and extracted with dichloromethane (8 mL × 3). The combined organic layers were washed with brine (5 mL), dried over Na<sub>2</sub>SO<sub>4</sub>, filtered, and concentrated in *vacuo*. The crude reaction mixture was purified by silica column chromatography (50% ethyl acetate–hexanes), giving **9** as yellow oil (25.8 mg, 80%).

**R<sub>f</sub>** = 0.20 (25% ethyl acetate–hexanes).

**<sup>1</sup>H NMR** (CDCl<sub>3</sub>, 500 MHz): δ 7.40–7.28 (m, 5H), 5.11 (s, 2H), 2.79 (dd, *J* = 33.5, 14.4 Hz, 1H), 2.62 (dd, *J* = 15.6, 14.4 Hz, 1H), 2.69–2.54 (m, 2H), 2.49–2.33 (m, 2H), 2.28 (d, *J* = 5.3 Hz, 3H), 1.35 (d, *J* = 21.5 Hz, 3H).

**<sup>13</sup>C NMR** (CDCl<sub>3</sub>, 125 MHz): δ 210.9 (d, *J<sub>C-F</sub>* = 30.2 Hz), 155.2, 136.7, 128.5, 128.0, 127.9, 102.7 (d, *J<sub>C-F</sub>* = 184.9 Hz), 67.1, 63.9 (d, *J<sub>C-F</sub>* = 19.3 Hz), 54.2 (d, *J<sub>C-F</sub>* = 2.4 Hz), 44.0, 26.7, 20.8 (d, *J<sub>C-F</sub>* = 23.9 Hz).

**<sup>19</sup>F NMR** (CDCl<sub>3</sub>, 471 MHz): δ -156.11.

**FTIR** (thin film): cm<sup>-1</sup> 2860, 2810, 1697, 1425, 1358, 1236, 1098, 1008, 849, 734, 696.

**HRMS** (ESI) *m/z*: [M+H]<sup>+</sup> Calcd for C<sub>17</sub>H<sub>24</sub>FN<sub>2</sub>O<sub>3</sub><sup>+</sup> 323.1766; found: 323.1764.

## 7.2. Synthesis of the bioactive β-fluoro alkylamine compounds

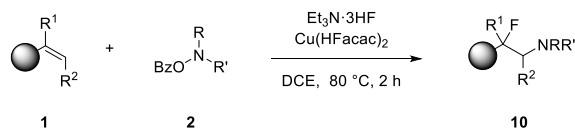

### General procedure 3 (GP3) for alkene aminofluorination reactions.

To a 10-mL FEP tube with Teflon-coated micro stir bar was added *O*-benzoylhydroxylamine **2** (0.2 mmol, 1.0 equiv) and Cu(HFacac)<sub>2</sub> (2.4 mg, 2.5 mol%). DCE (1.0 mL), alkene **1** (0.4 mmol, 2.0 equiv), and Et<sub>3</sub>N•3HF (322 mg, 2 mmol, 10 equiv) were sequentially added. The mixture was allowed to stir at 80 °C for 2 h until the consumption of *O*-benzoylhydroxylamine (verified by TLC, 20% ethyl acetate–hexanes). The resulting reaction mixture was cooled to room temperature and quenched through the addition of Et<sub>3</sub>N (0.5 mL). The solution was then diluted with ethyl acetate to a final volume of 5.0 mL and filtered through a plug of activated, neutral Al<sub>2</sub>O<sub>3</sub> (Brockman grade I, 58–60Å). The filtrate was concentrated under reduced pressure, providing the crude reaction mixture. The crude reaction mixture was purified by silica column chromatography.

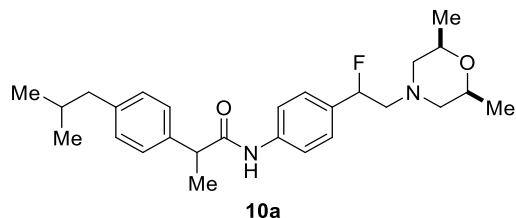

***N*-(4-(2-(2,6-Dimethylmorpholino)-1-fluoroethyl)phenyl)-2-(4-isobutylphenyl)propanamide (10a).** Synthesized using **GP3** from **1aa** and *O*-benzoyl-2,6-dimethyl-hydroxylmorpholine **2h**. <sup>19</sup>F-NMR analysis of the crude reaction mixture indicated a diastereomeric ratio (dr) of 1:1.

Isolated by flash column chromatography (20% ethyl acetate–hexanes to 33% ethyl acetate–hexanes), as a yellowish oil (55.5 mg, 63%).

**R<sub>f</sub>** = 0.10 (33% ethyl acetate–hexanes).

**<sup>1</sup>H NMR** (CDCl<sub>3</sub>, 500 MHz): δ 7.43 (d, *J* = 8.3 Hz, 2H), 7.23 (d, *J* = 8.3 Hz, 2H), 7.23 (d, *J* = 8.0 Hz, 2H), 7.15 (d, *J* = 8.0 Hz, 2H), 5.59 (ddd, *J* = 48.6, 8.5, 1.7 Hz, 1H), 3.78–3.65 (m, 2H), 3.78–3.65 (m, 1H), 2.90 (d, *J* = 11.3 Hz, 1H), 2.87–2.81 (m, 1H), 2.79 (d, *J* = 10.4 Hz, 1H), 2.57 (dd, *J* = 33.8, 14.5 Hz, 1H), 2.47 (d, *J* = 7.2 Hz, 2H), 1.97–1.79 (m, 2H), 1.97–1.79 (m, 1H), 1.58 (d, *J* = 7.1 Hz, 3H), 1.16 (d, *J* = 4.1 Hz, 3H), 1.15 (d, *J* = 4.1 Hz, 3H), 0.90 (d, *J* = 6.6 Hz, 6H).

**<sup>13</sup>C NMR** (CDCl<sub>3</sub>, 125 MHz): δ 172.7, 141.2, 138.1, 137.9, 134.4 (d, *J*<sub>C-F</sub> = 20.3 Hz), 129.9, 127.4, 126.3 (d, *J*<sub>C-F</sub> = 6.6 Hz), 119.6, 92.2 (d, *J*<sub>C-F</sub> = 173.6 Hz), 71.6, 64.4 (d, *J*<sub>C-F</sub> = 23.5 Hz), 59.9, 59.6, 47.8, 45.0, 30.2, 22.4, 19.2, 19.1, 18.5.

**<sup>19</sup>F NMR** (CDCl<sub>3</sub>, 471 MHz): δ -175.18, -175.20.

**FTIR** (thin film): cm<sup>-1</sup> 2969, 2632, 2868, 1663, 1601, 1516, 1454, 1411, 1248, 1083, 885, 840, 735.

**HRMS** (ESI) *m/z*: [M+H]<sup>+</sup> Calcd for C<sub>27</sub>H<sub>38</sub>FN<sub>2</sub>O<sub>2</sub><sup>+</sup> 441.2912; found: 441.2912.

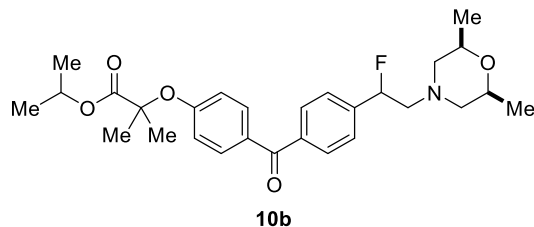

**Isopropyl 2-(4-(4-(2-(2,6-dimethylmorpholino)-1-fluoroethyl)benzoyl)phenoxy)-2-methylpropanoate (10b).** Synthesized using **GP3** from **1ab** and *O*-benzoyl-2,6-dimethyl-hydroxylmorpholine **2h**. Isolated by flash column chromatography (20% ethyl acetate–hexanes to 40% ethyl acetate–hexanes), as a yellowish oil (37.0 mg, 38%).

**R<sub>f</sub>** = 0.20 (33% ethyl acetate–hexanes).

**<sup>1</sup>H NMR** (CDCl<sub>3</sub>, 500 MHz): δ 7.76 (d, *J* = 4.1 Hz, 2H), 7.74 (d, *J* = 4.1 Hz, 2H), 7.43 (d, *J* = 8.1 Hz, 2H),

6.86 (d,  $J = 8.1$  Hz, 2H), 5.73 (ddd,  $J = 48.9, 8.5, 2.3$  Hz, 1H), 5.19–4.95 (m, 1H), 3.79–3.58 (m, 2H), 2.89 (ddd,  $J = 22.5, 14.4, 8.5$  Hz, 2H), 2.81 (d,  $J = 10.9$  Hz, 1H), 2.66 (ddd,  $J = 33.6, 14.4, 2.3$  Hz, 1H), 1.95 (dd,  $J = 23.4, 10.8$  Hz, 2H), 1.66 (s, 6H), 1.20 (d,  $J = 6.3$  Hz, 6H), 1.18 (d,  $J = 3.1$  Hz, 3H), 1.17 (d,  $J = 3.1$  Hz, 3H).

$^{13}\text{C}$  NMR ( $\text{CDCl}_3$ , 125 MHz):  $\delta$  195.0, 173.1, 159.7, 142.7 (d,  $J_{\text{C-F}} = 20.0$  Hz), 138.2, 132.0, 130.4, 129.9, 125.2 (d,  $J_{\text{C-F}} = 7.3$  Hz), 117.2, 92.2 (d,  $J_{\text{C-F}} = 175.4$  Hz), 79.4, 71.7, 69.4, 64.4 (d,  $J_{\text{C-F}} = 22.5$  Hz), 60.0, 59.7, 25.4, 21.5, 19.2, 19.1.

$^{19}\text{F}$  NMR ( $\text{CDCl}_3$ , 471 MHz):  $\delta$  -179.49.

FTIR (thin film):  $\text{cm}^{-1}$  2978, 2933, 2807, 1729, 1653, 1598, 1249, 1144, 1102, 929, 854, 767.

HRMS (ESI)  $m/z$ :  $[\text{M}+\text{H}]^+$  Calcd for  $\text{C}_{28}\text{H}_{37}\text{FNO}_5^+$  486.2650; found: 486.2645.

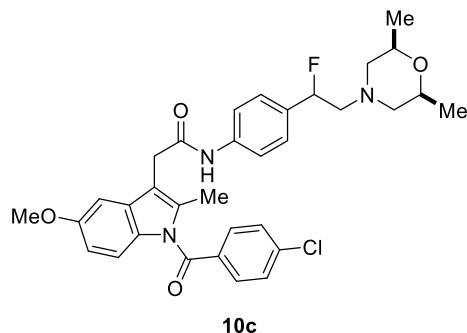

**2-(1-(4-Chlorobenzoyl)-5-methoxy-2-methyl-1H-indol-3-yl)-N-(4-(2-(2,6-dimethylmorpholino)-1-fluoroethyl)phenyl)acetamide (10c).** Synthesized using GP3 from **1ac** and *O*-benzoyl-2,6-dimethyl-hydroxylmorpholine **2h** from the reaction on 0.1 mmol scale. Isolated by flash column chromatography (33% ethyl acetate–hexanes to 70% ethyl acetate–hexanes), as a yellowish oil (38.3 mg, 65%).

$R_f = 0.20$  (67% ethyl acetate–hexanes).

$^1\text{H}$  NMR ( $\text{CDCl}_3$ , 500 MHz):  $\delta$  7.67 (d,  $J = 8.2$  Hz, 2H), 7.48 (d,  $J = 8.2$  Hz, 2H), 7.43–7.33 (m, 2H), 7.38 (br, 1H), 7.30–7.16 (m, 2H), 6.94 (s, 1H), 6.87 (d,  $J = 7.3$  Hz, 1H), 6.71 (d,  $J = 7.3$  Hz, 1H), 5.59 (dd,  $J = 48.6, 7.5$  Hz, 1H), 3.80 (s, 3H), 3.80 (s, 2H), 3.76–3.64 (m, 2H), 2.88 (d,  $J = 10.7$  Hz, 1H), 2.85–2.80 (m, 1H), 2.77 (d,  $J = 11.1$  Hz, 1H), 2.64–2.49 (m, 1H), 2.44 (s, 3H), 1.97–1.83 (m, 2H), 1.16 (d,  $J = 3.3$  Hz, 3H), 1.15 (d,  $J = 3.3$  Hz, 3H).

$^{13}\text{C}$  NMR ( $\text{CDCl}_3$ , 125 MHz):  $\delta$  168.4, 168.3, 156.4, 139.7, 137.6, 136.7, 135.1, 134.9, 133.5, 131.2, 131.0, 130.1, 129.3, 126.3 (d,  $J_{\text{C-F}} = 6.6$  Hz), 120.1, 115.2, 112.5, 112.2, 100.8, 92.2 (d,  $J_{\text{C-F}} = 173.7$  Hz), 71.6, 64.4 (d,  $J_{\text{C-F}} = 23.4$  Hz), 60.0, 59.6, 55.8, 33.4, 19.2, 19.1, 13.4.

$^{19}\text{F}$  NMR ( $\text{CDCl}_3$ , 471 MHz):  $\delta$  -175.59.

FTIR (thin film):  $\text{cm}^{-1}$  3294, 2929, 2855, 1679, 1603, 1477, 1357, 1322, 1144, 1087, 836, 754.

HRMS (ESI)  $m/z$ :  $[\text{M}+\text{H}]^+$  Calcd for  $\text{C}_{33}\text{H}_{36}\text{ClFN}_3\text{O}_4^+$  592.2373; found: 592.2372.

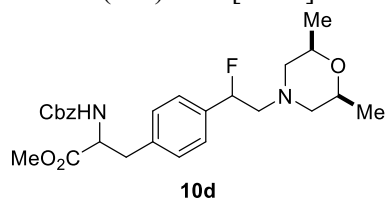

**Methyl 2-(((benzyloxy)carbonyl)amino)-3-(4-(2-(2,6-dimethylmorpholino)-1-fluoroethyl)phenyl)propanoate (10d).** Synthesized using GP3 from **1ad** and *O*-benzoyl-2,6-dimethyl-hydroxylmorpholine **2h**.  $^{19}\text{F}$ -NMR analysis of the crude reaction mixture indicated a diastereomeric ratio (dr) of 1:1. Isolated by flash column chromatography (20% ethyl acetate–hexanes to 33% ethyl acetate–hexanes), as a yellowish oil (56.8 mg, 60%).

$R_f = 0.25$  (50% ethyl acetate–hexanes).

**<sup>1</sup>H NMR** (CDCl<sub>3</sub>, 500 MHz): δ 7.39–7.29 (m, 5H), 7.24 (d, *J* = 7.8 Hz, 2H), 7.10 (d, *J* = 7.8 Hz, 2H), 5.62 (ddd, *J* = 48.8, 8.7, 1.9 Hz, 1H), 5.22 (d, *J* = 6.8 Hz, 1H), 5.13–5.01 (m, 2H), 4.66 (dd, *J* = 13.5, 5.8 Hz, 1H), 3.83–3.61 (m, 2H), 3.72 (s, 3H), 3.21–3.02 (m, 2H), 2.90 (d, *J* = 11.0 Hz, 1H), 2.88–2.82 (m, 1H), 2.79 (d, *J* = 11.0 Hz, 1H), 2.57 (dd, *J* = 34.8, 14.3 Hz, 1H), 1.97–1.85 (m, 2H), 1.17 (d, *J* = 2.5 Hz, 3H), 1.16 (d, *J* = 2.5 Hz, 3H).

**<sup>13</sup>C NMR** (CDCl<sub>3</sub>, 125 MHz): δ 171.8, 155.6, 137.7 (d, *J*<sub>C-F</sub> = 20.1 Hz), 136.2, 136.1, 129.5, 128.6, 128.3, 128.1, 125.8 (d, *J*<sub>C-F</sub> = 6.7 Hz), 92.4 (d, *J*<sub>C-F</sub> = 173.7 Hz), 71.7, 71.6, 67.0, 64.5 (d, *J*<sub>C-F</sub> = 23.0 Hz), 60.1, 59.6, 54.7, 52.4, 37.9, 37.8, 19.2, 19.1.

**<sup>19</sup>F NMR** (CDCl<sub>3</sub>, 471 MHz): δ -176.68, -176.68.

**FTIR** (thin film): cm<sup>-1</sup> 3330, 2970, 2870, 1718, 1514, 1454, 1212, 1112, 886, 736, 698.

**HRMS** (ESI) *m/z*: [M+H]<sup>+</sup> Calcd for C<sub>26</sub>H<sub>34</sub>FN<sub>2</sub>O<sub>5</sub><sup>+</sup> 473.2446; found: 473.2445.

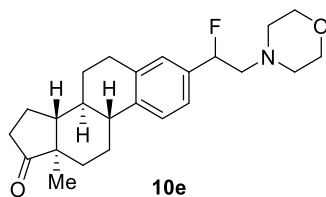

**3-(1-Fluoro-2-morpholinoethyl)-13-methyl-6,7,8,9,11,12,13,14,15,16-decahydro-17H-cyclopenta[a]phenanthren-17-one (10e)**. Synthesized using **GP3** from **1ae** and *O*-benzoylhydroxylmorpholine **2a**. Run the reaction at (0.1 mmol) scale. <sup>19</sup>F-NMR analysis of the crude reaction mixture indicated a diastereomeric ratio (dr) of 1:1. Isolated by flash column chromatography (10% ethyl acetate–hexanes to 40% ethyl acetate–hexanes), as a yellowish oil (33.6 mg, 87%).

**R<sub>f</sub>** = 0.25 (50% ethyl acetate–hexanes).

**<sup>1</sup>H NMR** (CDCl<sub>3</sub>, 500 MHz): δ 7.30 (d, *J* = 8.1 Hz, 1H), 7.12 (d, *J* = 8.1 Hz, 1H), 7.08 (s, 1H), 5.61 (ddd, *J* = 49.1, 8.9, 1.8 Hz, 1H), 3.75 (t, *J* = 4.6 Hz, 4H), 2.99–2.86 (m, 2H), 2.99–2.86 (m, 1H), 2.69–2.56 (m, 1H), 2.69–2.56 (m, 4H), 2.51 (dd, *J* = 18.1, 8.9 Hz, 1H), 2.41 (dd, *J* = 18.1, 10.1 Hz, 1H), 2.36–2.25 (m, 1H), 2.20–2.09 (m, 1H), 2.10–2.00 (m, 2H), 2.00–1.93 (m, 1H), 1.68–1.57 (m, 2H), 1.57–1.40 (m, 4H), 0.91 (s, 3H).

**<sup>13</sup>C NMR** (CDCl<sub>3</sub>, 125 MHz): δ 220.7, 140.3, 140.2, 136.8, 136.3 (d, *J*<sub>C-F</sub> = 19.7 Hz), 136.1 (d, *J*<sub>C-F</sub> = 19.7 Hz), 126.3 (d, *J*<sub>C-F</sub> = 6.5 Hz), 126.2 (d, *J*<sub>C-F</sub> = 6.5 Hz), 125.6, 125.5, 123.1, 123.0, 92.6 (d, *J*<sub>C-F</sub> = 173.2 Hz), 92.5 (d, *J*<sub>C-F</sub> = 173.2 Hz), 67.0, 65.0 (d, *J*<sub>C-F</sub> = 23.5 Hz), 64.9 (d, *J*<sub>C-F</sub> = 23.5 Hz), 54.1, 50.5, 48.0, 44.4, 38.2, 38.1, 35.9, 31.6, 29.5, 29.4, 26.3, 25.7, 21.6, 13.9.

**<sup>19</sup>F NMR** (CDCl<sub>3</sub>, 471 MHz): δ -175.26, -175.53.

**FTIR** (thin film): cm<sup>-1</sup> 2929, 2855, 1736, 1453, 1257, 1116, 1008, 869, 734.

**HRMS** (ESI) *m/z*: [M+H]<sup>+</sup> Calcd for C<sub>24</sub>H<sub>33</sub>FNO<sub>2</sub><sup>+</sup> 386.2490; found: 386.2489.

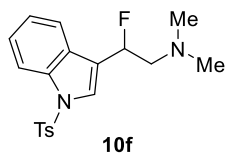

**2-Fluoro-N,N-dimethyl-2-(1-tosyl-1H-indol-3-yl)ethan-1-amine (10f)**. Synthesized using **GP3** from **1af** and *O*-benzoyl-*N,N*-dimethylhydroxylamine **2p**. Isolated by flash column chromatography (20% ethyl acetate–hexanes to 50% ethyl acetate–hexanes), as a yellowish oil (20.9 mg, 26%).

**R<sub>f</sub>** = 0.20 (50% ethyl acetate–hexanes).

**<sup>1</sup>H NMR** (CDCl<sub>3</sub>, 500 MHz): δ 7.97 (d, *J* = 8.3 Hz, 1H), 7.77 (d, *J* = 7.9 Hz, 2H), 7.62 (d, *J* = 2.3 Hz, 1H), 7.59 (d, *J* = 8.3 Hz, 1H), 7.34 (t, *J* = 7.7 Hz, 1H), 7.26 (t, *J* = 7.7 Hz, 2H), 7.23 (d, *J* = 7.9 Hz, 2H), 5.85 (ddd, *J* = 48.4, 8.5, 2.2 Hz, 1H), 3.05 (ddd, *J* = 17.0, 14.0, 8.6 Hz, 1H), 2.76 (ddd, *J* = 32.1, 14.0, 2.5 Hz,

1H), 2.40 (s, 6H), 2.35 (s, 3H).

<sup>13</sup>C NMR (CDCl<sub>3</sub>, 125 MHz): δ 145.2, 135.1 (d, *J*<sub>C-F</sub> = 9.0 Hz), 130.0, 128.4 (d, *J*<sub>C-F</sub> = 2.7 Hz), 126.9, 125.1, 123.7 (d, *J*<sub>C-F</sub> = 9.3 Hz), 123.4, 120.2, 120.1, 120.0, 113.8, 87.3 (d, *J*<sub>C-F</sub> = 169.8 Hz), 63.5 (d, *J*<sub>C-F</sub> = 22.8 Hz), 46.0, 21.6.

<sup>19</sup>F NMR (CDCl<sub>3</sub>, 471 MHz): δ -176.88.

FTIR (thin film): cm<sup>-1</sup> 2923, 2853, 1596, 1446, 1370, 1172, 1019, 974, 746.

HRMS (ESI) m/z: [M+H]<sup>+</sup> Calcd for C<sub>19</sub>H<sub>22</sub>FN<sub>2</sub>O<sub>2</sub>S<sup>+</sup> 361.1381; found: 361.1377.

### 7.3. Synthesis of the sigma receptor antagonist derivative [F]-YZ185

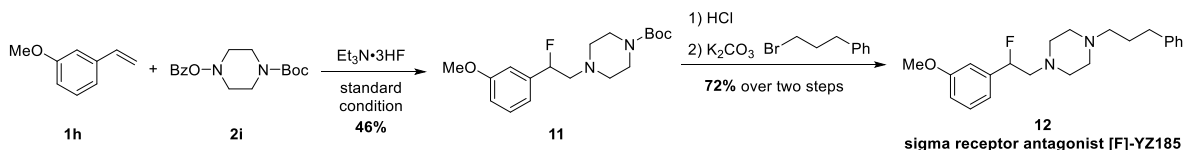

To a 10-mL FEP tube with Teflon-coated micro stir bar was added *O*-benzoyl-4-*tert*-butoxycarbonylhydroxylpiperazine **2i** (0.2 mmol, 1.0 equiv) and Cu(HFacac)<sub>2</sub> (2.4 mg, 2.5 mol%). DCE (1.0 mL), 1-methoxy-3-vinylbenzene **1h** (0.4 mmol, 2.0 equiv), and Et<sub>3</sub>N·3HF (322 mg, 2 mmol, 10 equiv) were sequentially added. The mixture was then stirred at 80 °C for 2 h until the consumption of *O*-benzoylhydroxylamine, verified by TLC (20% ethyl acetate–hexanes) analysis. The resulting reaction mixture was cooled to room temperature and quenched through the addition of Et<sub>3</sub>N (0.5 mL). The solution was then diluted with ethyl acetate to a final volume of 5.0 mL and filtered through a plug of activated, neutral Al<sub>2</sub>O<sub>3</sub> (Brockman grade I, 58–60Å). The filtrate was concentrated under reduced pressure, providing the crude reaction mixture. The crude reaction mixture was purified by silica column chromatography (50% ethyl acetate–hexanes), giving **11** as yellowish oil (30.7 mg, 46%).

#### *tert*-Butyl 4-(2-fluoro-2-(3-methoxyphenyl)ethyl)piperazine-1-carboxylate (**11**).

R<sub>f</sub> = 0.15 (25% ethyl acetate–hexanes).

<sup>1</sup>H NMR (CDCl<sub>3</sub>, 500 MHz): δ 7.28 (t, *J* = 7.8 Hz, 1H), 6.88 (d, *J* = 7.8 Hz, 2H), 6.78 (s, 1H), 5.62 (ddd, *J* = 48.9, 8.7, 2.2 Hz, 1H), 3.81 (s, 3H), 3.47 (t, *J* = 4.6 Hz, 4H), 2.91 (ddd, *J* = 17.6, 14.3, 8.7 Hz, 1H), 2.65 (ddd, *J* = 34.3, 14.3, 2.5 Hz, 1H), 2.60–2.49 (m, 4H), 1.46 (s, 9H).

<sup>13</sup>C NMR (CDCl<sub>3</sub>, 125 MHz): δ 159.7, 154.7, 140.3 (d, *J*<sub>C-F</sub> = 19.8 Hz), 129.6, 117.7 (d, *J*<sub>C-F</sub> = 7.1 Hz), 113.9, 111.1 (d, *J*<sub>C-F</sub> = 7.8 Hz), 92.6 (d, *J*<sub>C-F</sub> = 174.6 Hz), 79.7, 64.6 (d, *J*<sub>C-F</sub> = 23.0 Hz), 55.3, 53.4, 28.4.

<sup>19</sup>F NMR (CDCl<sub>3</sub>, 471 MHz): δ -177.09.

FTIR (thin film): cm<sup>-1</sup> 2933, 1692, 1421, 1365, 1245, 1169, 1125, 1004, 868, 779, 698.

HRMS (ESI) m/z: [M+H]<sup>+</sup> Calcd for C<sub>18</sub>H<sub>28</sub>FN<sub>2</sub>O<sub>3</sub><sup>+</sup> 339.2079; found: 339.2076.

To a 25-mL round-bottom flask was added *tert*-butyl 4-(2-fluoro-2-(3-methoxyphenyl)ethyl)piperazine-1-carboxylate **11** (33.8 mg, 0.1 mmol, 1.0 equiv), 1,4-dioxane (2.0 mL), HCl in 1,4-dioxane (4 M, 0.2 mL, 0.8 mmol, 8.0 equiv). The reaction was allowed to stir at room temperature for 8 h, and then concentrated under reduced pressure. The crude solid was used for the next step without further purification.

To a solution of the crude residue in DMSO (2 mL), was added potassium carbonate (27.6 mg, 0.2 mmol, 2.0 equiv), 1-bromo-3-phenylpropane (23.9 mg, 0.12 mmol, 1.2 equiv). The mixture was allowed to stir at room temperature for overnight. The reaction was quenched by the addition of water (2 mL). The mixture was extracted with ethyl acetate (5 mL × 3). The combined organic layers were washed with water (10 mL × 2) and the brine (10 mL). The organic layer was dried over Na<sub>2</sub>SO<sub>4</sub>, filtered and concentrated *in vacuo*. Purification by flash column chromatography (30% ethyl acetate–hexanes to 50% ethyl acetate–hexanes) gave **12** as colorless oil (25.6 mg, 72% over two steps).

### 1-(2-Fluoro-2-(3-methoxyphenyl)ethyl)-4-(3-phenylpropyl)piperazine (12).

$R_f$  = 0.15 (50% ethyl acetate–hexanes).

$^1\text{H NMR}$  ( $\text{CDCl}_3$ , 500 MHz):  $\delta$  7.28 (dd,  $J$  = 8.5, 7.0 Hz, 3H), 7.19 (d,  $J$  = 7.1 Hz, 3H), 6.94–6.80 (m, 3H), 5.62 (ddd,  $J$  = 49.1, 8.8, 1.9 Hz, 1H), 3.81 (s, 3H), 2.91 (ddd,  $J$  = 17.6, 14.3, 8.9 Hz, 1H), 2.78–2.46 (m, 1H), 2.78–2.46 (m, 8H), 2.78–2.46 (m, 2H), 2.45–2.34 (m, 2H), 1.84 (q,  $J$  = 7.7 Hz, 2H).

$^{13}\text{C NMR}$  ( $\text{CDCl}_3$ , 125 MHz):  $\delta$  159.7, 142.1, 140.5 (d,  $J_{\text{C-F}}$  = 19.7 Hz), 129.6, 128.4, 128.3, 125.8, 117.8 (d,  $J_{\text{C-F}}$  = 6.7 Hz), 113.9, 111.1 (d,  $J_{\text{C-F}}$  = 7.5 Hz), 92.6 (d,  $J_{\text{C-F}}$  = 174.4 Hz), 64.6 (d,  $J_{\text{C-F}}$  = 22.8 Hz), 58.0, 55.3, 53.6, 53.1, 33.7, 28.5.

$^{19}\text{F NMR}$  ( $\text{CDCl}_3$ , 471 MHz):  $\delta$  -177.01.

**FTIR** (thin film):  $\text{cm}^{-1}$  2934, 2809, 1699, 1602, 1493, 1454, 1267, 1158, 1030, 784, 748.

**HRMS** (ESI)  $m/z$ :  $[\text{M}+\text{H}]^+$  Calcd for  $\text{C}_{22}\text{H}_{30}\text{FN}_2\text{O}^+$  357.2337; found: 357.2337.

## 8. Mechanism studies

### 8.1. Control experiment in the presence of 2,6-di-*tert*-butyl-4-methylphenol (BHT)

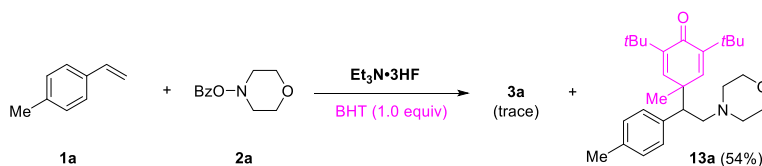

To a 10-mL FEP tube with Teflon-coated micro stir bar was added *O*-benzoylhydroxylmorpholine **2a** (41.4 mg, 0.2 mmol, 1.0 equiv), 2,6-di-*tert*-butyl-4-methylphenol (BHT, 44.1 mg, 0.2 mmol, 1.0 equiv) and  $\text{Cu}(\text{HFacac})_2$  (2.4 mg, 2.5 mol %). DCE (1.0 mL), 4-methylstyrene **1a** (0.4 mmol, 2.0 equiv) and  $\text{Et}_3\text{N}\cdot 3\text{HF}$  (322 mg, 2 mmol, 10 equiv) were sequentially added. The mixture was allowed to stir at 80 °C for 2 h until the consumption of *O*-benzoylhydroxylamine (verified by TLC, 20% ethyl acetate–hexanes). The resulting reaction mixture was cooled to room temperature and quenched through the addition of  $\text{Et}_3\text{N}$  (0.5 mL). The solution was then diluted with ethyl acetate to a final volume of 5.0 mL and filtered through a plug of activated, neutral  $\text{Al}_2\text{O}_3$  (Brockman grade I, 58–60Å). The filtrate was concentrated under reduced pressure, providing the crude reaction mixture. The crude reaction mixture was purified by silica column chromatography (20% ethyl acetate–hexanes), giving **13a** as yellow oil (46.1 mg, 54%).

### 2,6-Di-*tert*-butyl-4-methyl-4-(2-morpholino-1-(*p*-tolyl)ethyl)cyclohexa-2,5-dien-1-one (13a).

$R_f$  = 0.31 (33% ethyl acetate–hexanes).

$^1\text{H NMR}$  ( $\text{CDCl}_3$ , 500 MHz):  $\delta$  7.08 (d,  $J$  = 7.9 Hz, 2H), 6.98 (d,  $J$  = 7.9 Hz, 2H), 6.56 (d,  $J$  = 2.8 Hz, 1H), 6.43 (d,  $J$  = 2.8 Hz, 1H), 3.61–3.50 (m, 4H), 2.92 (dd,  $J$  = 8.1, 4.5 Hz, 1H), 2.53 (dd,  $J$  = 12.9, 8.1 Hz, 1H), 2.48 (dd,  $J$  = 12.9, 4.5 Hz, 1H), 2.32 (s, 3H), 2.28–2.24 (m, 4H), 1.26 (s, 9H), 1.15 (s, 9H), 1.07 (s, 3H).

$^{13}\text{C NMR}$  ( $\text{CDCl}_3$ , 125 MHz):  $\delta$  186.3, 146.5, 146.4, 144.3, 137.3, 136.4, 129.2, 128.5, 66.9, 60.1, 53.9, 52.5, 42.4, 34.9, 34.8, 29.5, 29.4, 25.2, 21.0.

**FTIR** (thin film):  $\text{cm}^{-1}$  1656, 1637, 1456, 1362, 1249, 1118, 910, 868, 734.

**HRMS** (ESI)  $m/z$ :  $[\text{M}+\text{H}]^+$  Calcd for  $\text{C}_{28}\text{H}_{42}\text{NO}_2^+$  424.3210; found: 424.3215.

### 8.2. Radical clock experiments



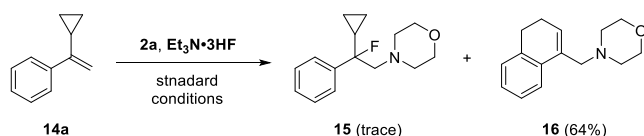

To a 10-mL FEP tube with Teflon-coated micro stir bar was added *O*-benzoylhydroxylmorpholine **2a** (41.4 mg, 0.2 mmol, 1.0 equiv) and  $\text{Cu}(\text{HFacac})_2$  (2.4 mg, 2.5 mol %). DCE (1.0 mL), (1-cyclopropylvinyl)benzene **14a** (0.4 mmol, 2.0 equiv), and  $\text{Et}_3\text{N}\cdot\text{3HF}$  (322 mg, 2 mmol, 10 equiv) were sequentially added. The mixture was allowed to stir at 80 °C for 2 h until the consumption of *O*-benzoylhydroxylamine (verified by TLC, 20% ethyl acetate–hexanes). The resulting reaction mixture was cooled to room temperature and quenched through the addition of  $\text{Et}_3\text{N}$  (0.5 mL). The solution was then diluted with ethyl acetate to a final volume of 5.0 mL and filtered through a plug of activated, neutral  $\text{Al}_2\text{O}_3$  (Brockman grade I, 58–60Å). The filtrate was concentrated under reduced pressure, providing the crude reaction mixture. The crude reaction mixture was purified by silica column chromatography (10% ethyl acetate–hexanes), giving **16** as clear oil (29.4 mg, 64%)

#### 4-((3,4-Dihydronaphthalen-1-yl)methyl)morpholine (**16**).

$^1\text{H}$  NMR ( $\text{CDCl}_3$ , 500 MHz):  $\delta$  7.57 (d,  $J = 7.6$  Hz, 1H), 7.22–7.11 (m, 3H), 6.02 (t,  $J = 4.2$  Hz, 1H), 3.75–3.66 (m, 4H), 3.30 (s, 2H), 2.76 (t,  $J = 8.0$  Hz, 2H), 2.48 (br s, 4H), 2.35–2.26 (m, 2H). Spectroscopic data match a previous report.<sup>8</sup>

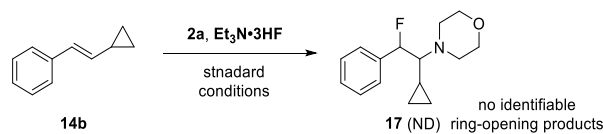

To a 10-mL FEP tube with Teflon-coated micro stir bar was added *O*-benzoylhydroxylmorpholine **2a** (41.4 mg, 0.2 mmol, 1.0 equiv) and  $\text{Cu}(\text{HFacac})_2$  (2.4 mg, 2.5 mol %). DCE (1.0 mL), (*E*)-(2-cyclopropylvinyl)benzene **14b** (0.4 mmol, 2.0 equiv), and  $\text{Et}_3\text{N}\cdot\text{3HF}$  (322 mg, 2 mmol, 10 equiv) were sequentially added. The mixture was allowed to stir at 80 °C for 2 h until the consumption of *O*-benzoylhydroxylamine (verified by TLC, 20% ethyl acetate–hexanes). The resulting reaction mixture was cooled to room temperature and quenched through the addition of  $\text{Et}_3\text{N}$  (0.5 mL). The solution was then diluted with ethyl acetate to a final volume of 5.0 mL and filtered through a plug of activated, neutral  $\text{Al}_2\text{O}_3$  (Brockman grade I, 58–60Å). The filtrate was concentrated under reduced pressure, providing the crude reaction mixture. The crude reaction mixture was analyzed by LC-MS,  $^1\text{H}$  NMR and  $^{19}\text{F}$  NMR spectrometry, none of which shows identifiable ring-opening product **17**.

## 9. References

- 1 Kang, T.; Kim, N.; Cheng, P. T.; Zhang, H.; Foo, K.; Engle, K. M. Nickel-Catalyzed 1, 2-Carboamination of Alkenyl Alcohols. *J. Am. Chem. Soc.* **2021**, *143*, 13962–13970.
- 2 An, Y.; Zhang, B.-S.; Zhang, Z.; Liu, C.; Gou, X.-Y.; Ding, Y.-N.; Liang, Y.-M. A Carboxylate-Assisted Amination/Unactivated C (Sp<sup>2</sup>)-H Arylation Reaction via a Palladium/Norbornene Cooperative Catalysis. *Chem. Commun.* **2020**, *56*, 5933–5936.
- 3 Kokare, N. D.; Nagawade, R. R.; Rane, V. P.; Shinde, D. B., Design, Synthesis and Utilization of a Novel Coupling Reagent for the Preparation of *O*-Alkyl Hydroxamic Acids. *Tetrahedron Lett.* **2007**, *48*, 4437–4440.
- 4 Svejstrup, T. D.; Ruffoni, A.; Juliá, F.; Aubert, V. M.; Leonori, D., Synthesis of Arylamines via Aminium Radicals. *Angew. Chem. Int. Ed.* **2017**, *56*, 14948–14952.
- 5 (a) Biloski, A. J.; Ganem, B., Improved Oxidation of Amines with Dibenzoyl Peroxide. *Synthesis* **1983**, 537–538. (b) Berman, A. M.; Johnson, J. S. Copper-Catalyzed Electrophilic Amination of Organozinc Nucleophiles: Documentation of *O*-Benzoyl Hydroxylamines as Broadly Useful R<sub>2</sub>N(+) and RHN(+) Synthons. *J. Org. Chem.* **2006**, *71*, 219–224. (c) Dhanju, S.; Crich, D., Synthesis of *N*, *N*, *O*-Trisubstituted Hydroxylamines by Stepwise Reduction and Substitution of *O*-Acyl *N*, *N*-Disubstituted Hydroxylamines. *Org. Lett.* **2016**, *18*, 1820–1823. (d) Shi, H.; Babinski, D. J.; Ritter, T., Modular C–H Functionalization Cascade of Aryl Iodides. *J. Am. Chem. Soc.* **2015**, *137*, 3775–3778. (e) Fan, L.; Liu, J.; Bai, L.; Wang, Y.; Luan, X., Rapid Assembly of Diversely Functionalized Spiroindenes by a Three-Component Palladium-Catalyzed C–H Amination/Phenol Dearomatization Domino Reaction. *Angew. Chem. Int. Ed.* **2017**, *56*, 14257–14261. (f) Zhu, S.; Buchwald, S. L., Enantioselective CuH-Catalyzed Anti-Markovnikov Hydroamination of 1, 1-Disubstituted Alkenes. *J. Am. Chem. Soc.* **2014**, *136*, 15913–15916.
- 6 Yu, S.; Noble, A.; Bedford, R. B.; Aggarwal, V. K. Methylene-spiro[2.3]hexanes via Nickel-Catalyzed Cyclopropanations with [1.1.1] Propellane. *J. Am. Chem. Soc.* **2019**, *141*, 20325–20334.
- 7 Kurandina, D.; Parasram, M.; Gevorgyan, V. Visible Light-Induced Room-Temperature Heck Reaction of Functionalized Alkyl Halides with Vinyl Arenes/Heteroarenes. *Angew. Chem. Int. Ed.* **2017**, *56*, 14212–14216.
- 8 Hemric, B. N.; Shen, K.; Wang, Q., Copper-Catalyzed Amino Lactonization and Amino Oxygenation of Alkenes Using *O*-Benzoylhydroxylamines. *J. Am. Chem. Soc.* **2016**, *138*, 5813–5816.

## 10. Copies of the NMR Spectra

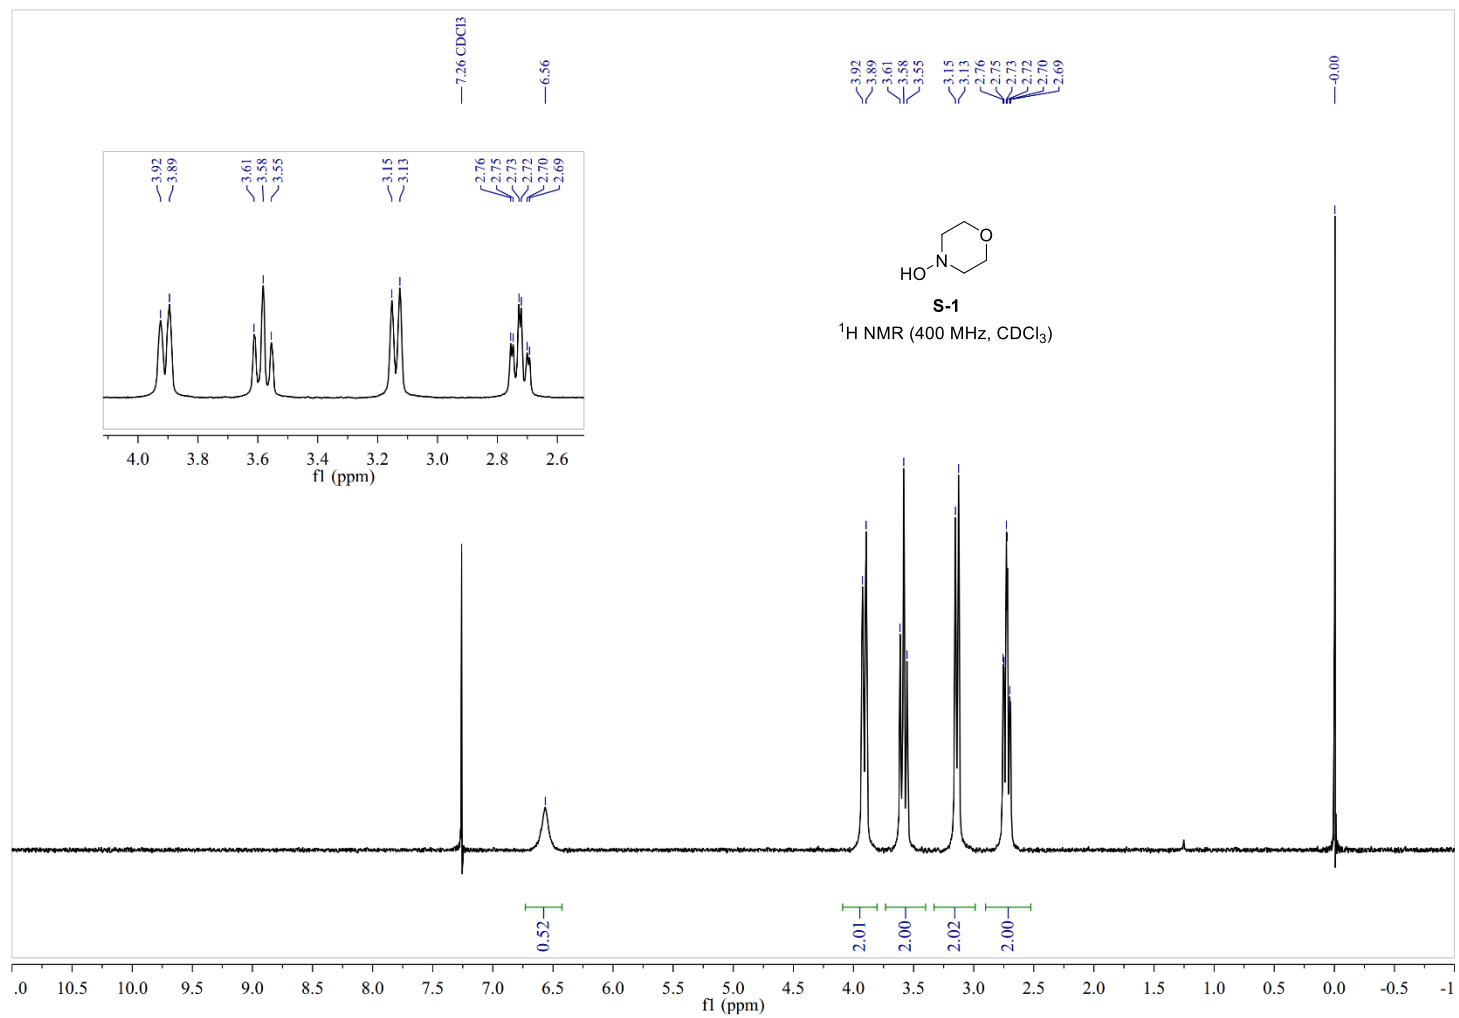

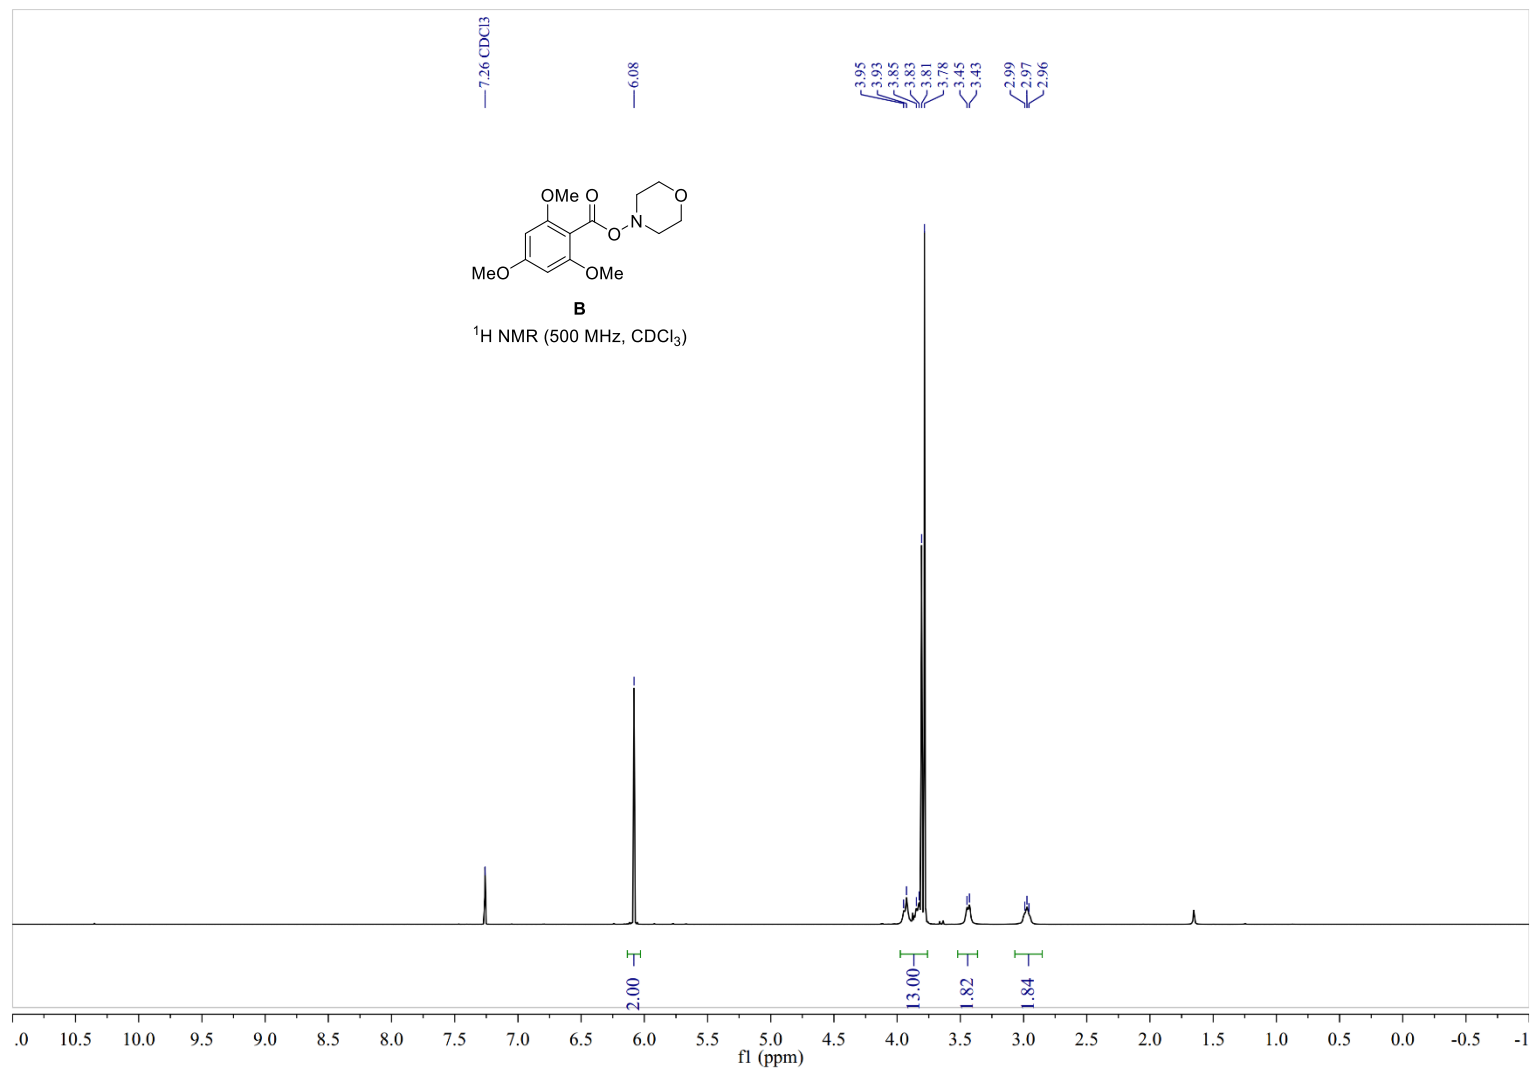

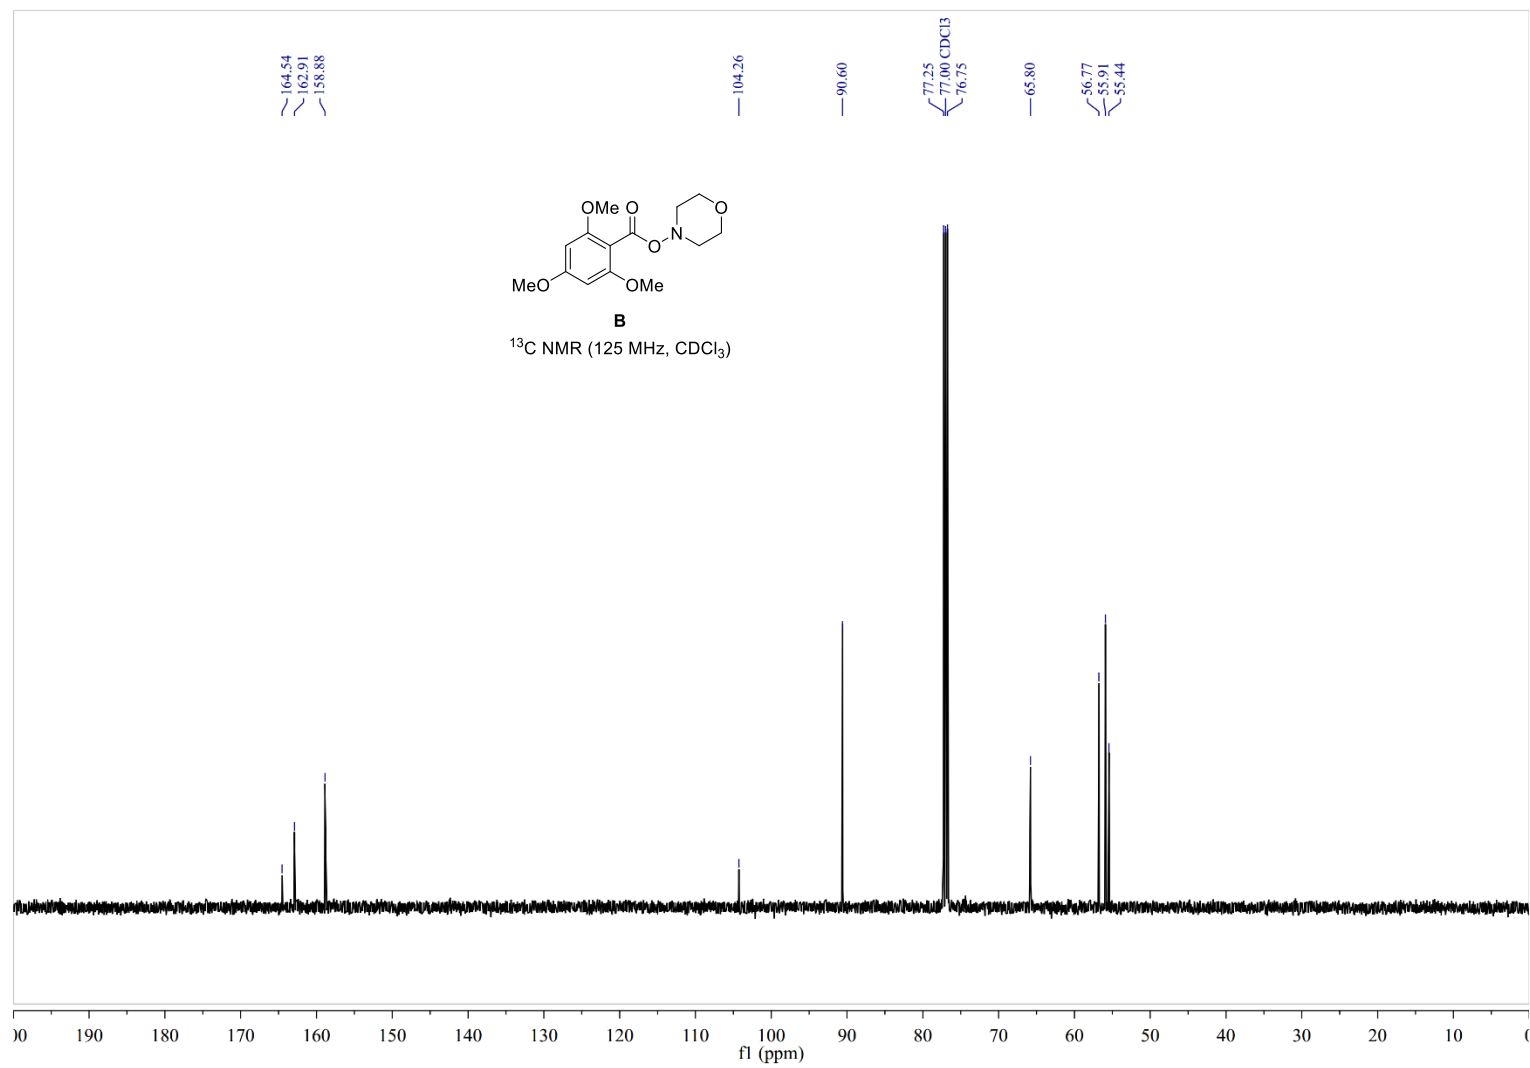

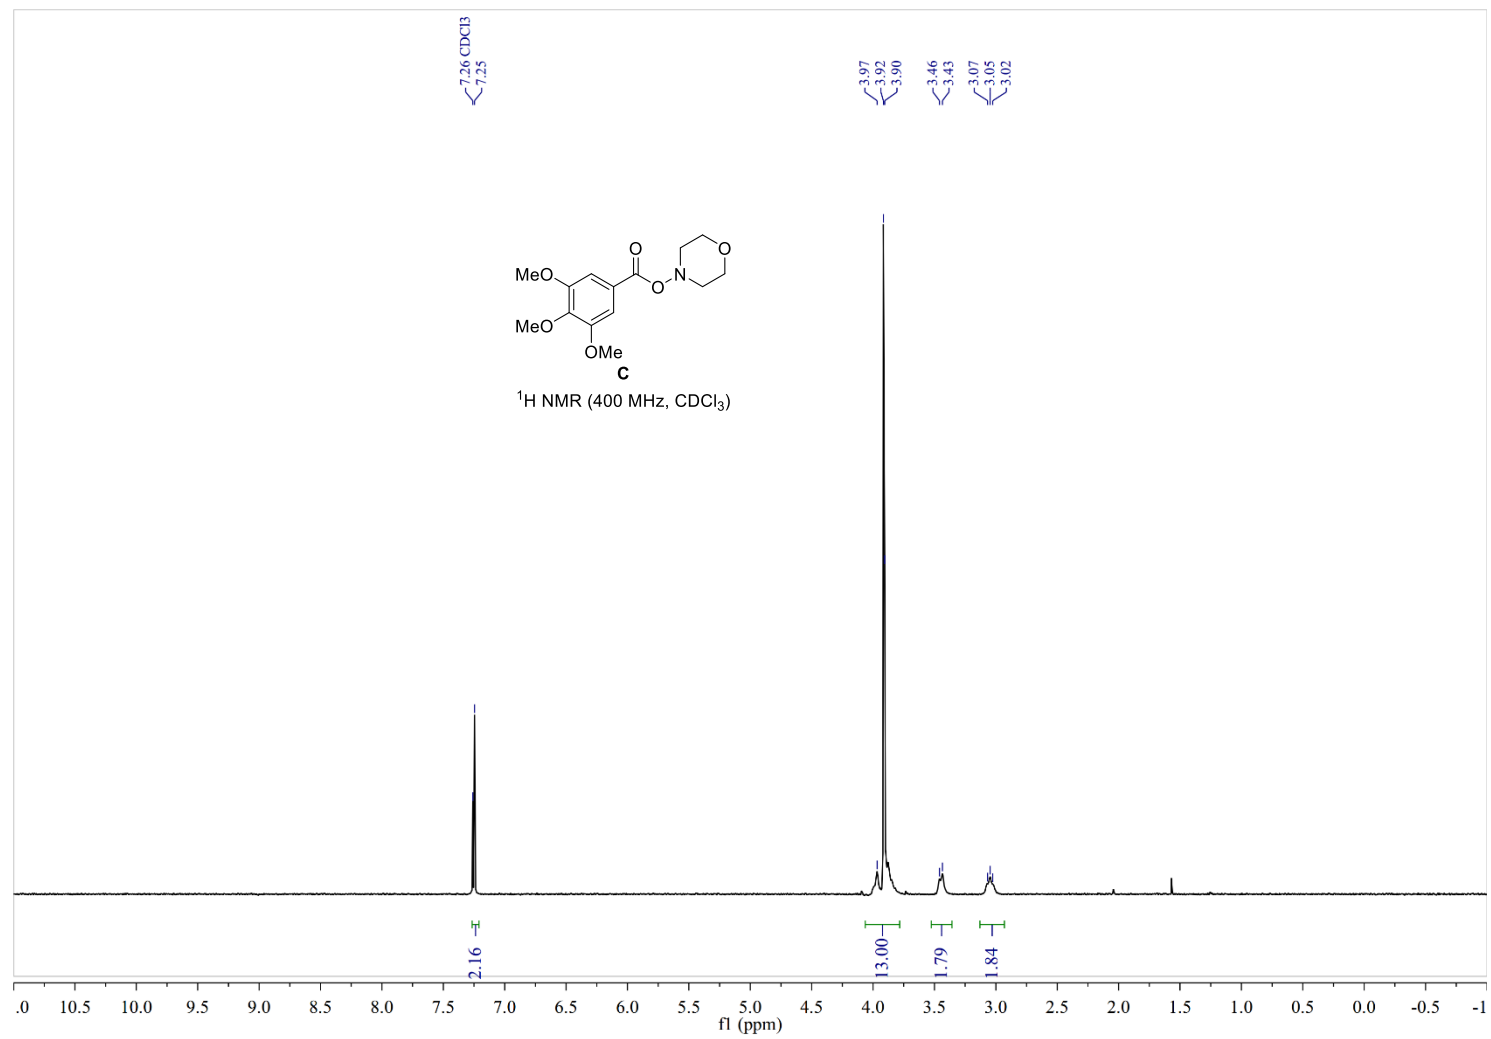

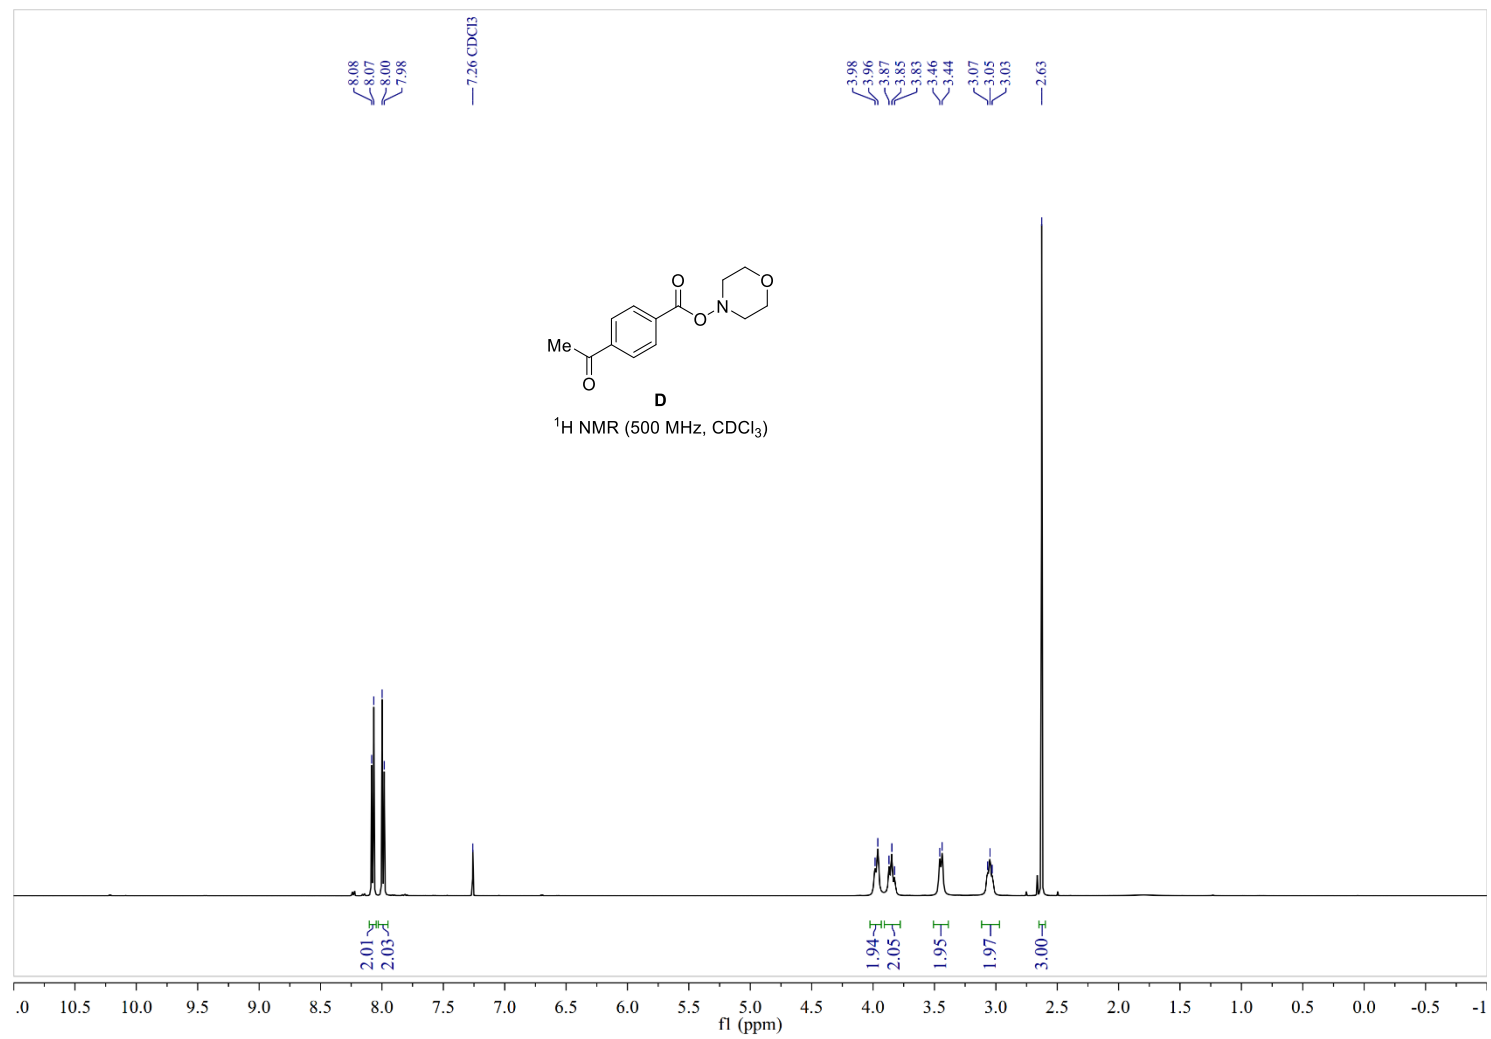

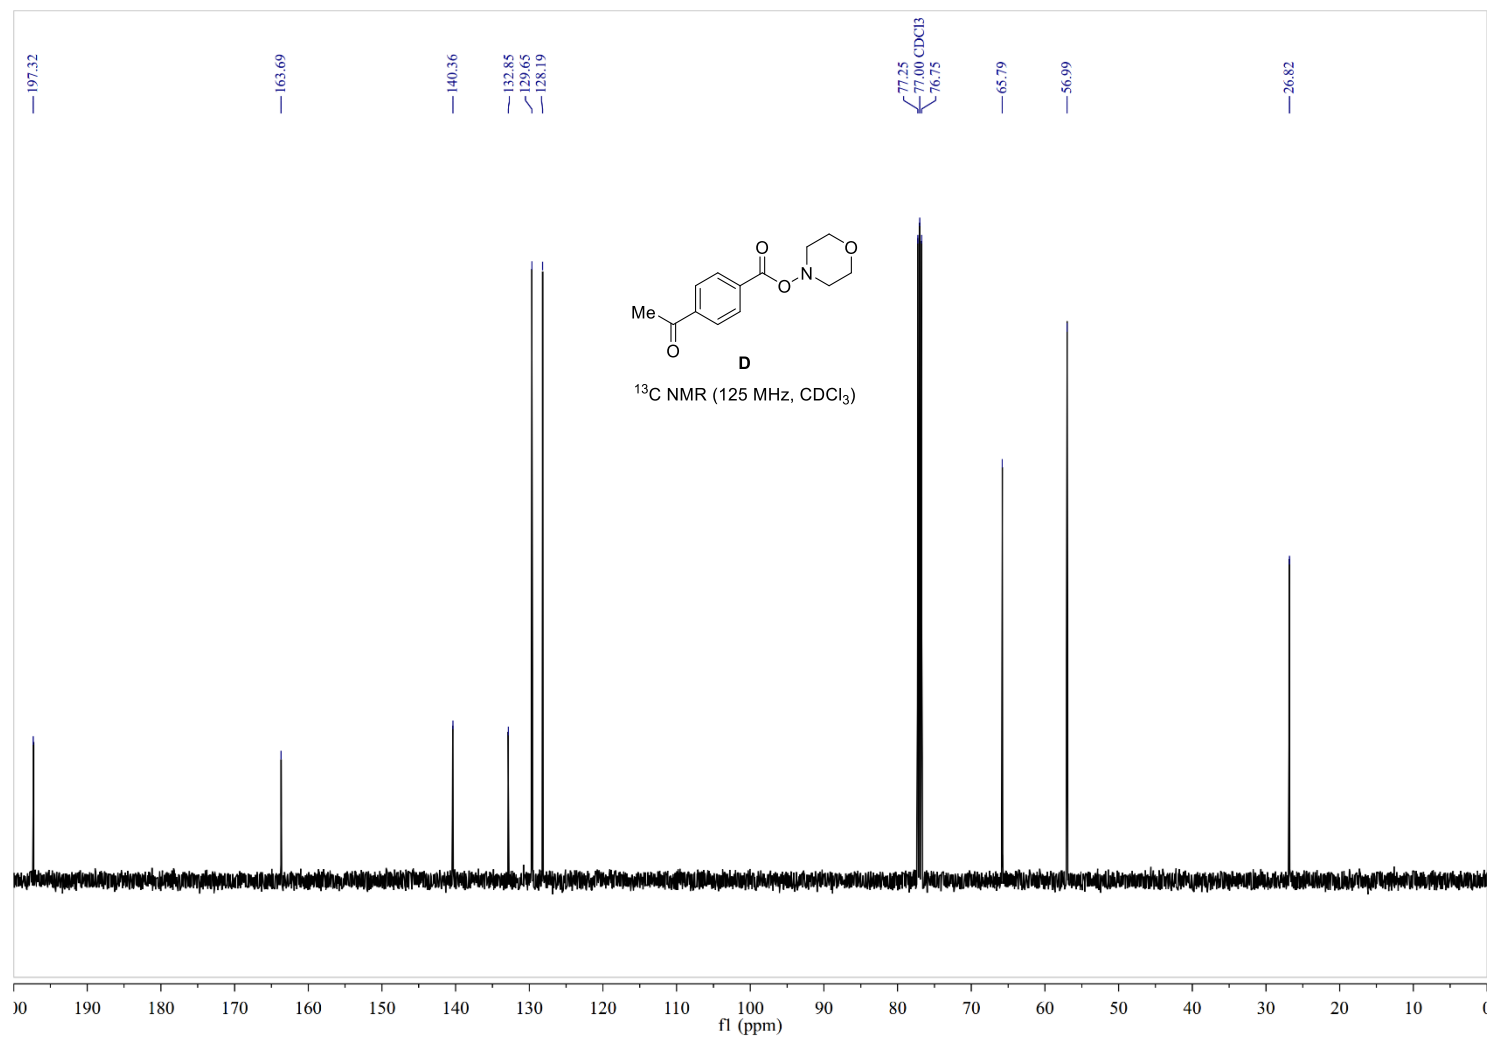



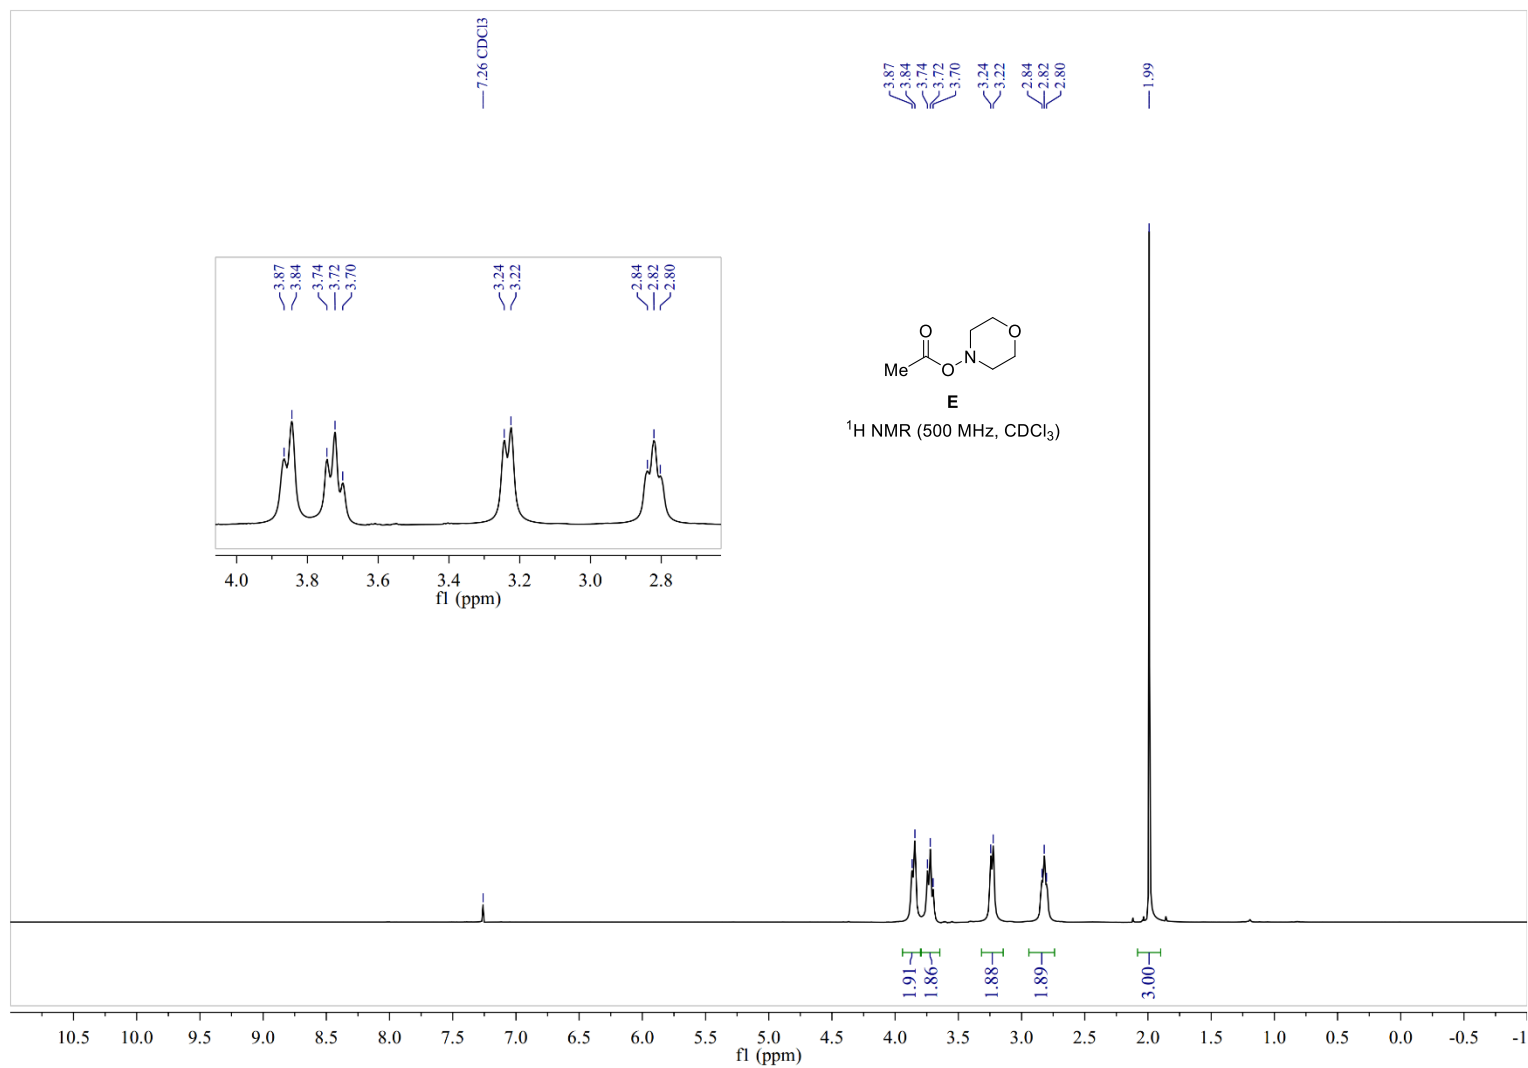

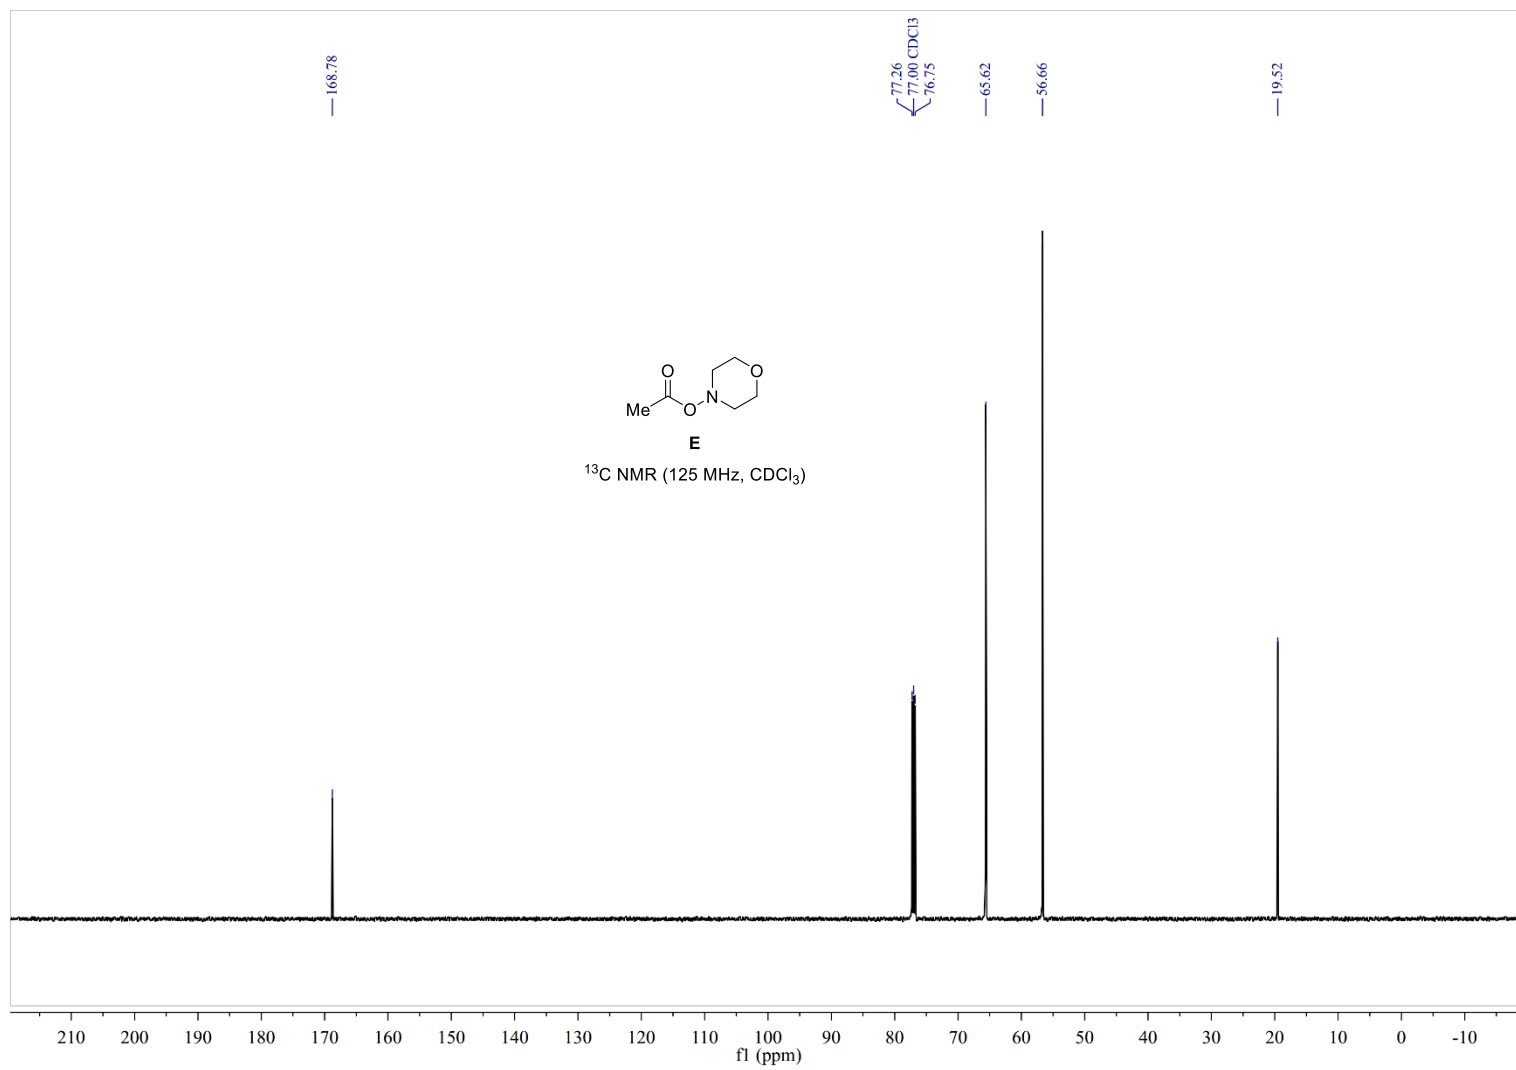

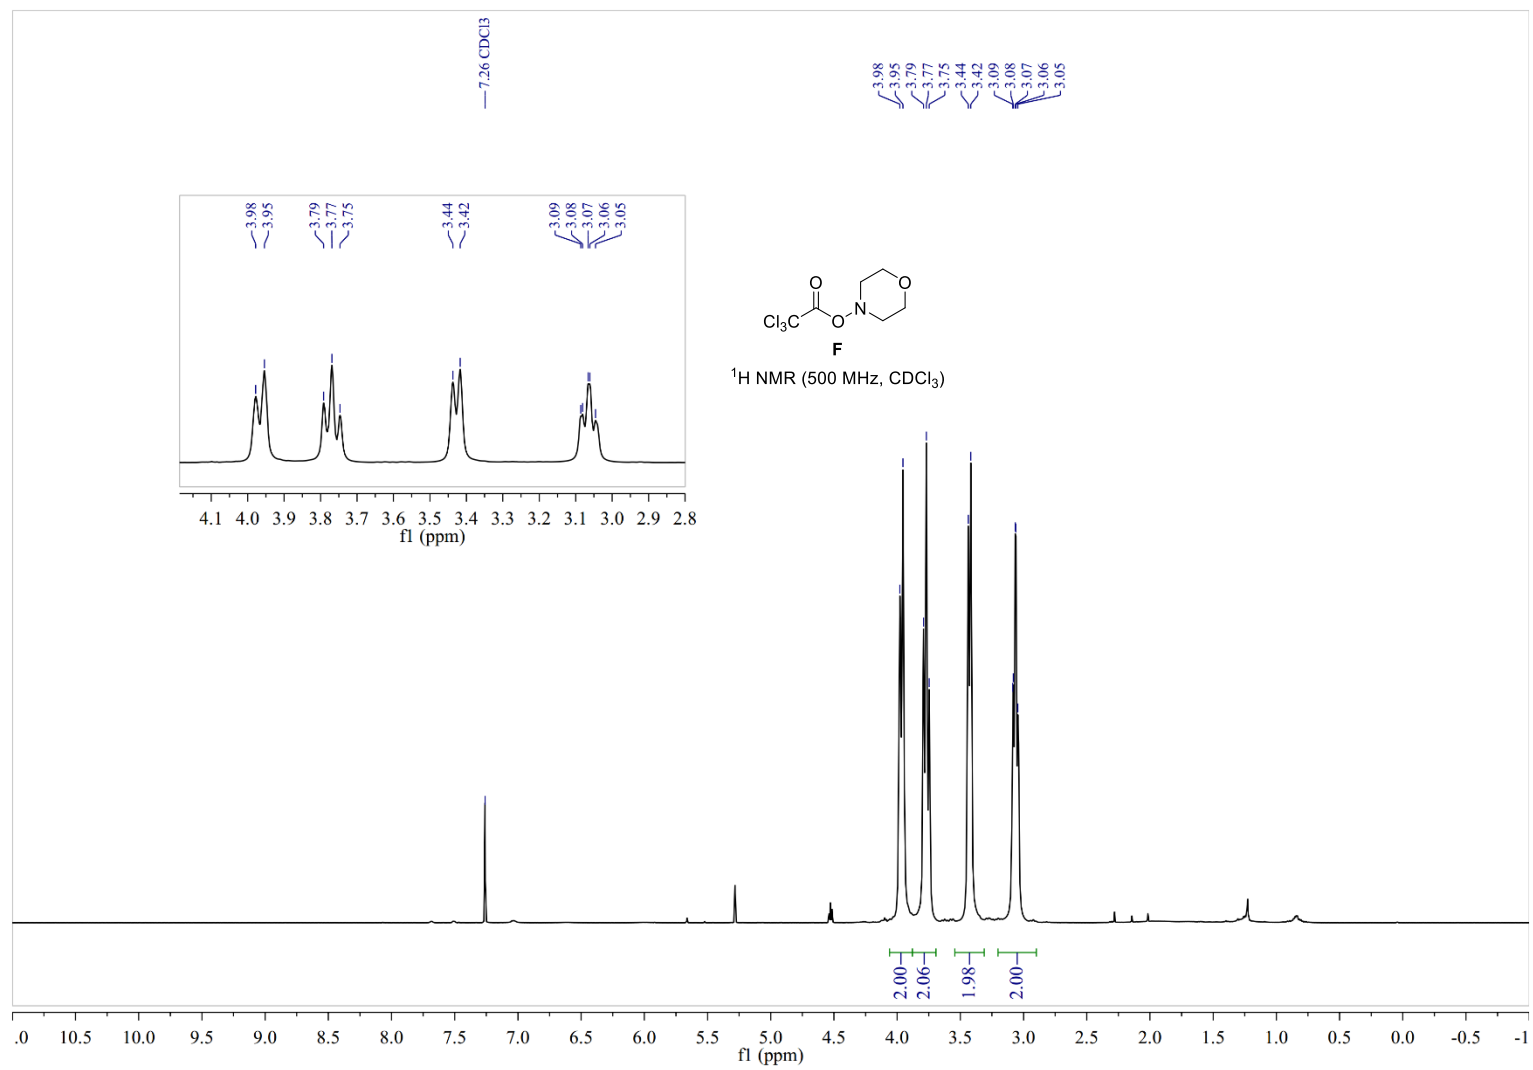

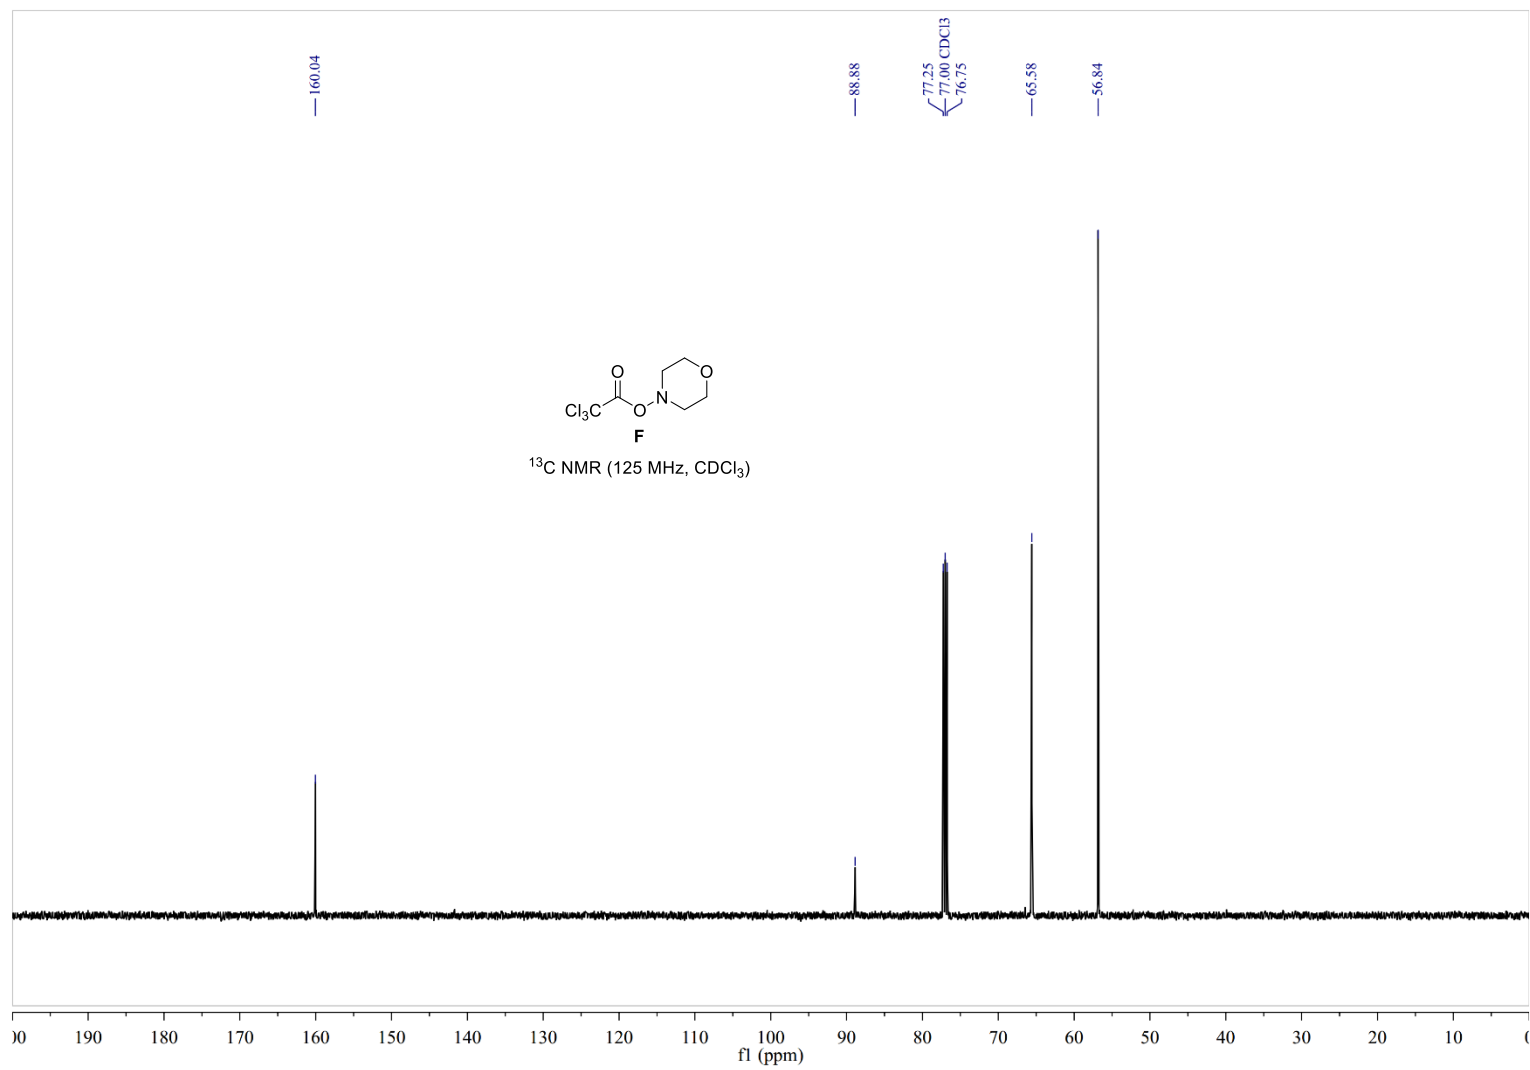

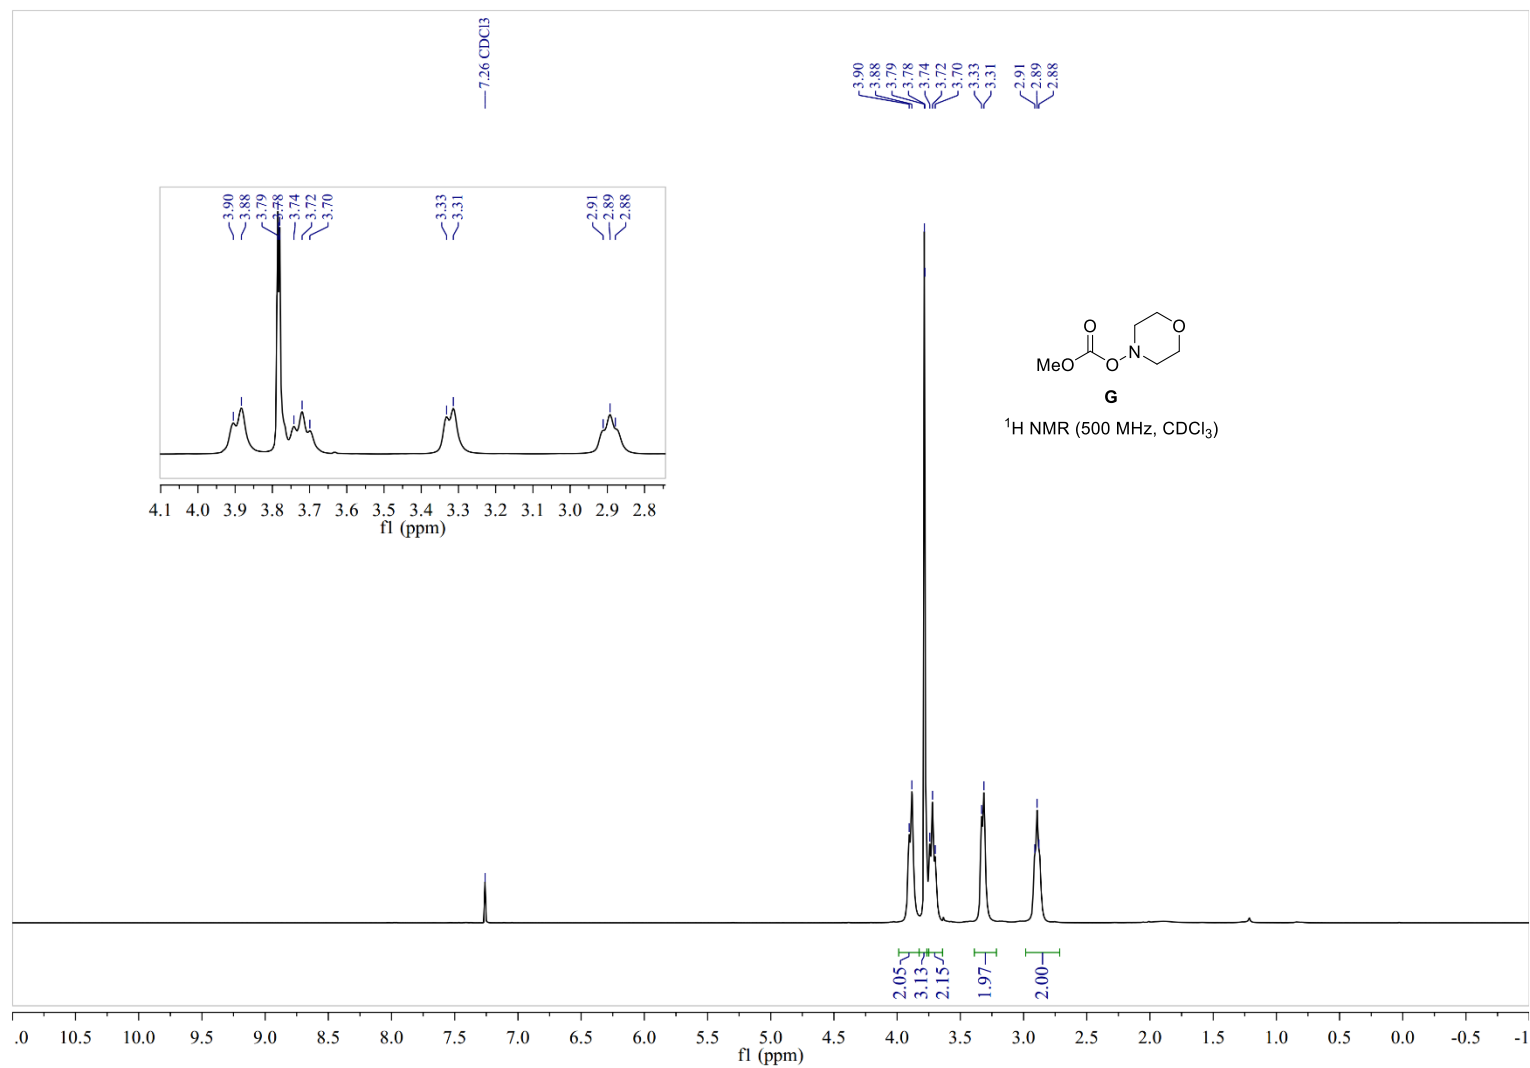

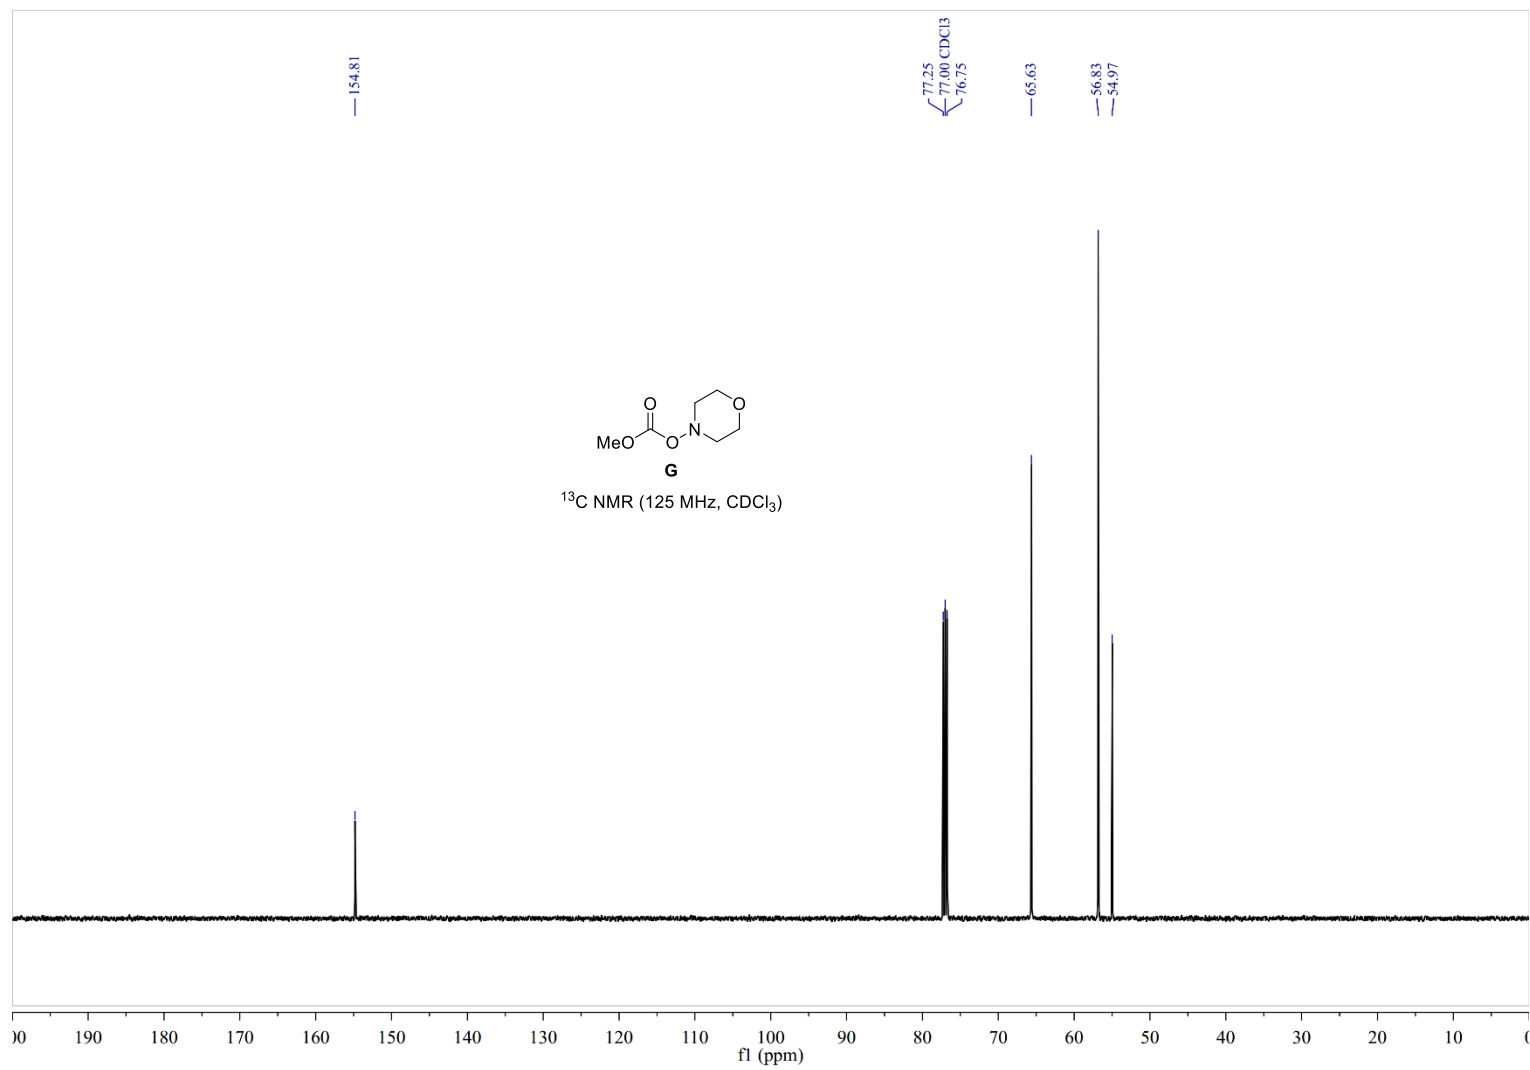

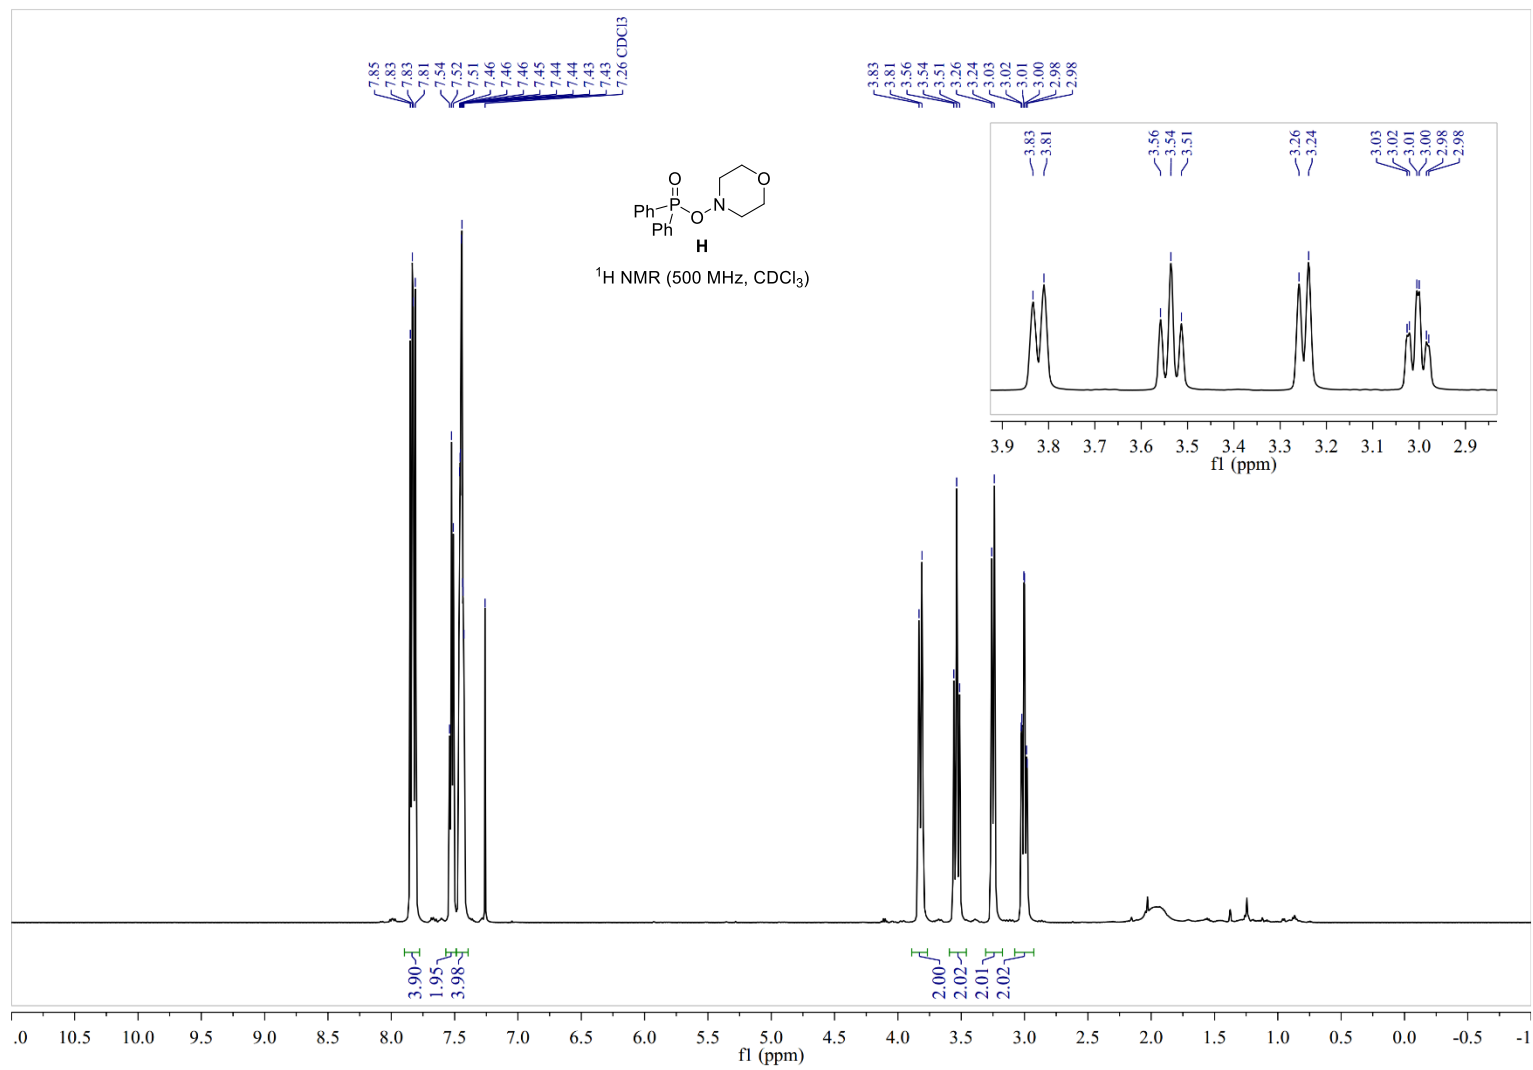

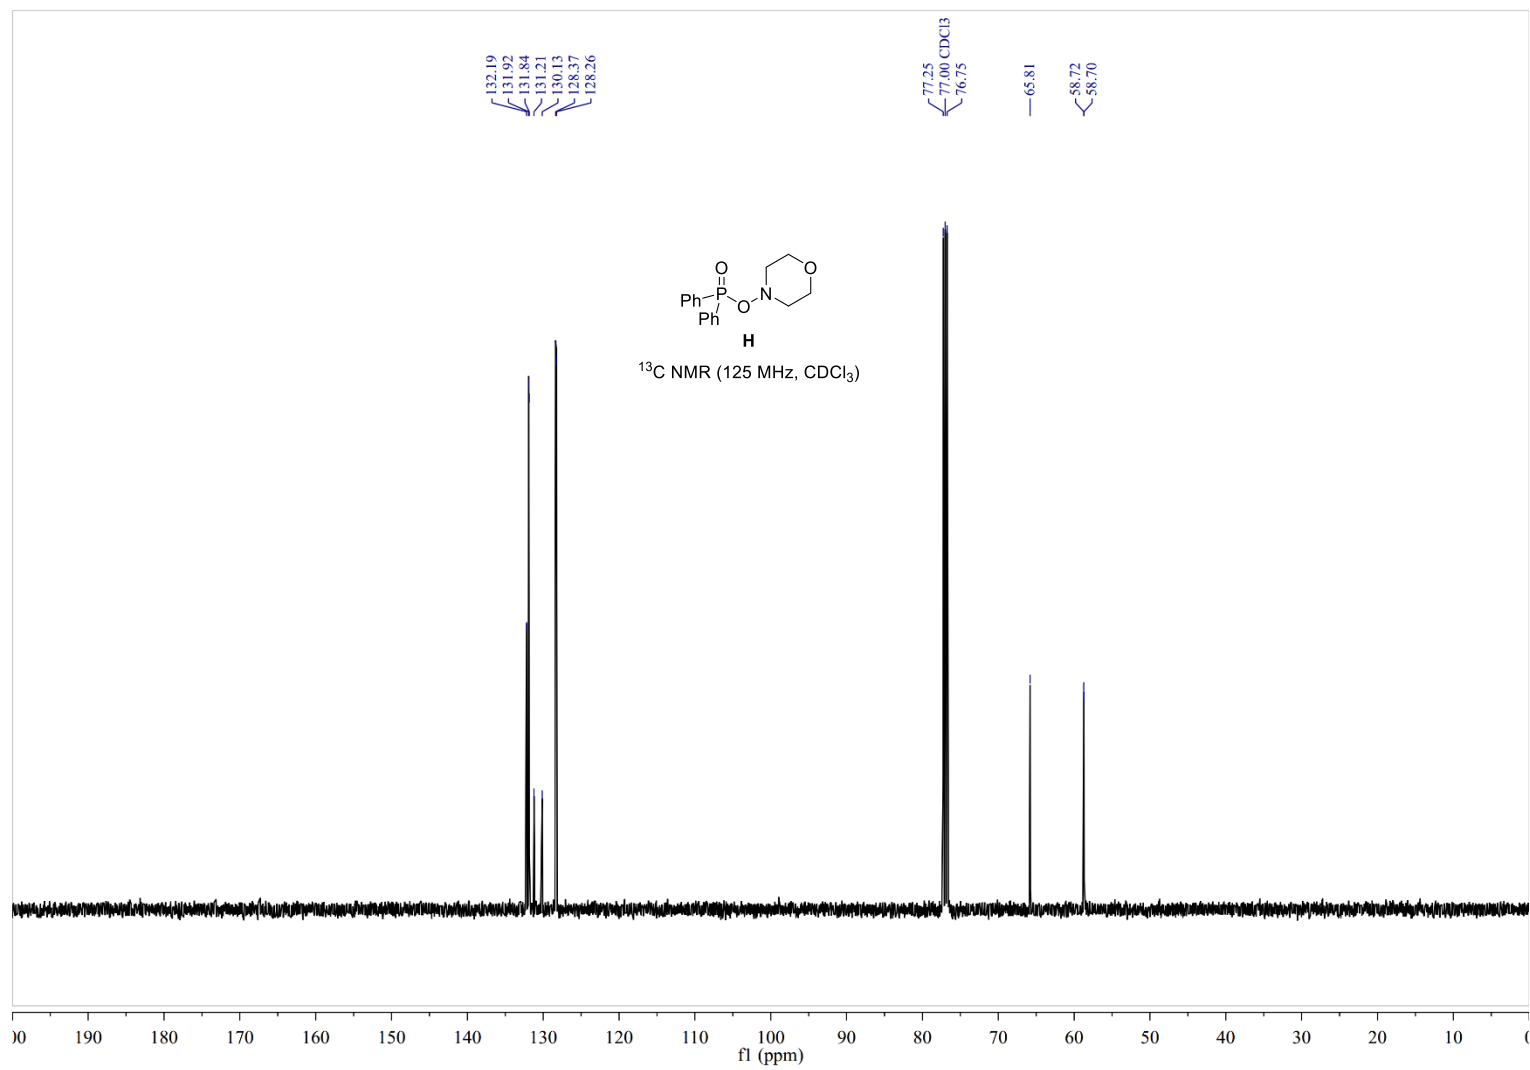



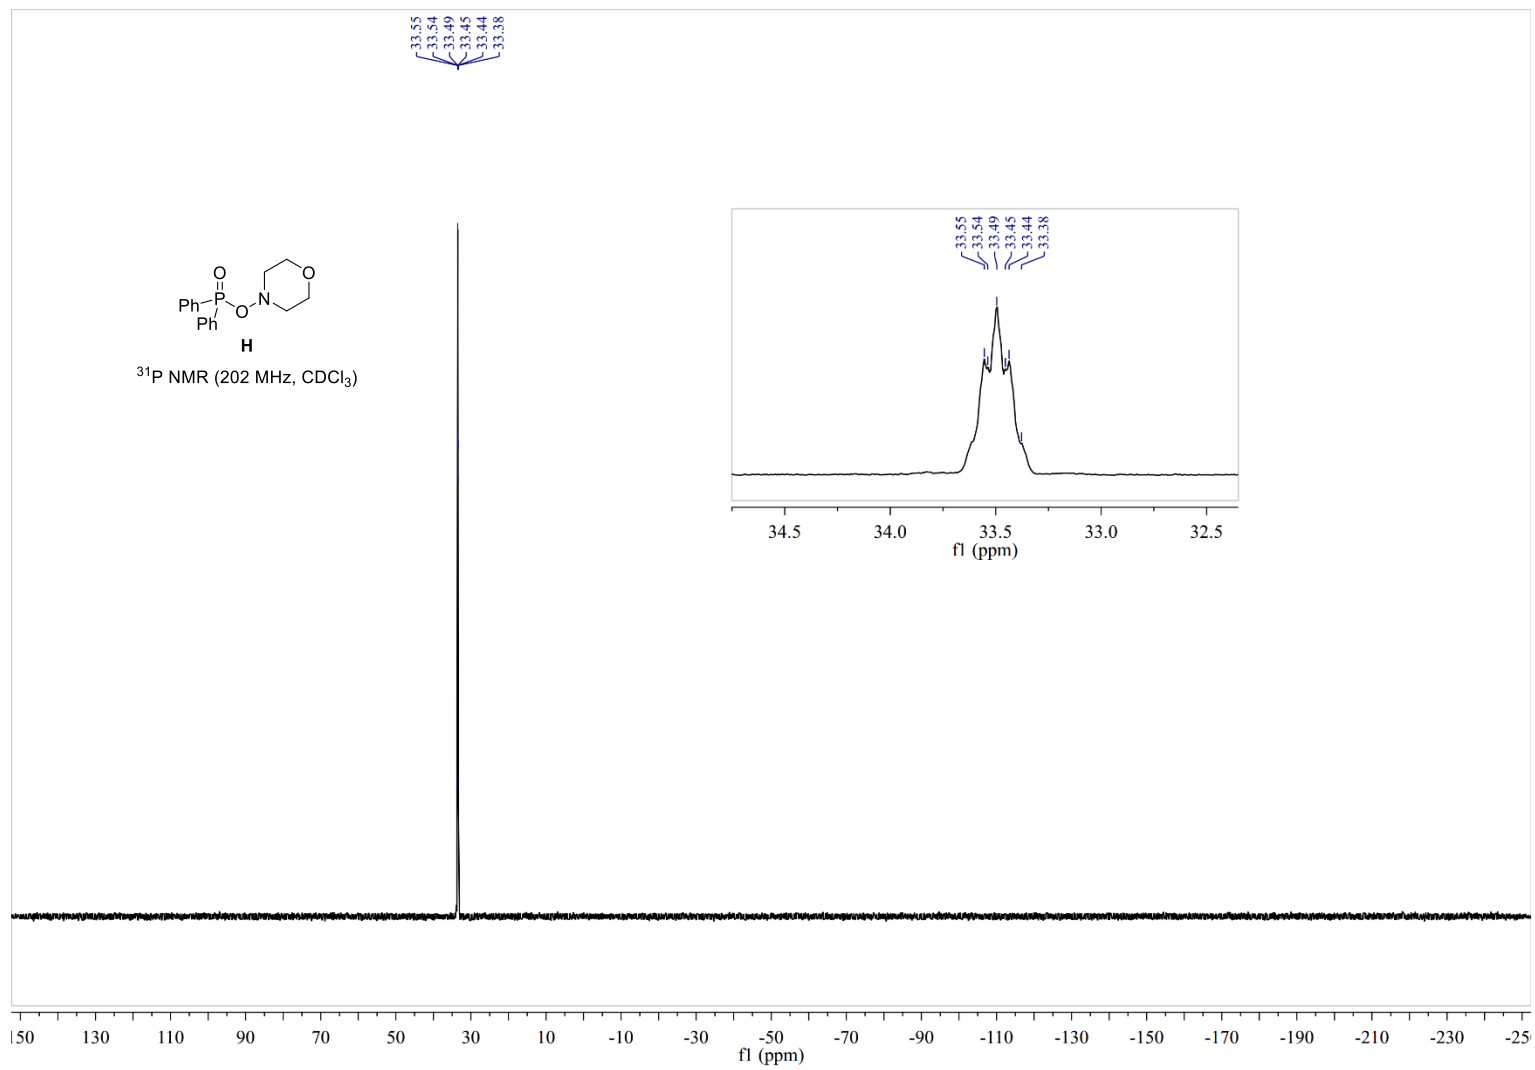

7.5942  
7.5793  
7.5644  
7.4626  
7.4470  
7.4316  
7.2601  
6.5719  
6.5507  
6.3471  
6.3435  
6.3135  
6.3089  
6.3067  
5.7532  
5.7356  
5.7321  
4.6465  
4.5294  
4.4459  
4.0723  
3.9936  
3.8721  
3.6753  
3.6008  
3.5677  
3.5150  
3.4485  
3.4169  
3.3444  
3.2569  
3.0516  
2.9578

<sup>1</sup>H NMR of gf-3-237aP in CDCl<sub>3</sub>

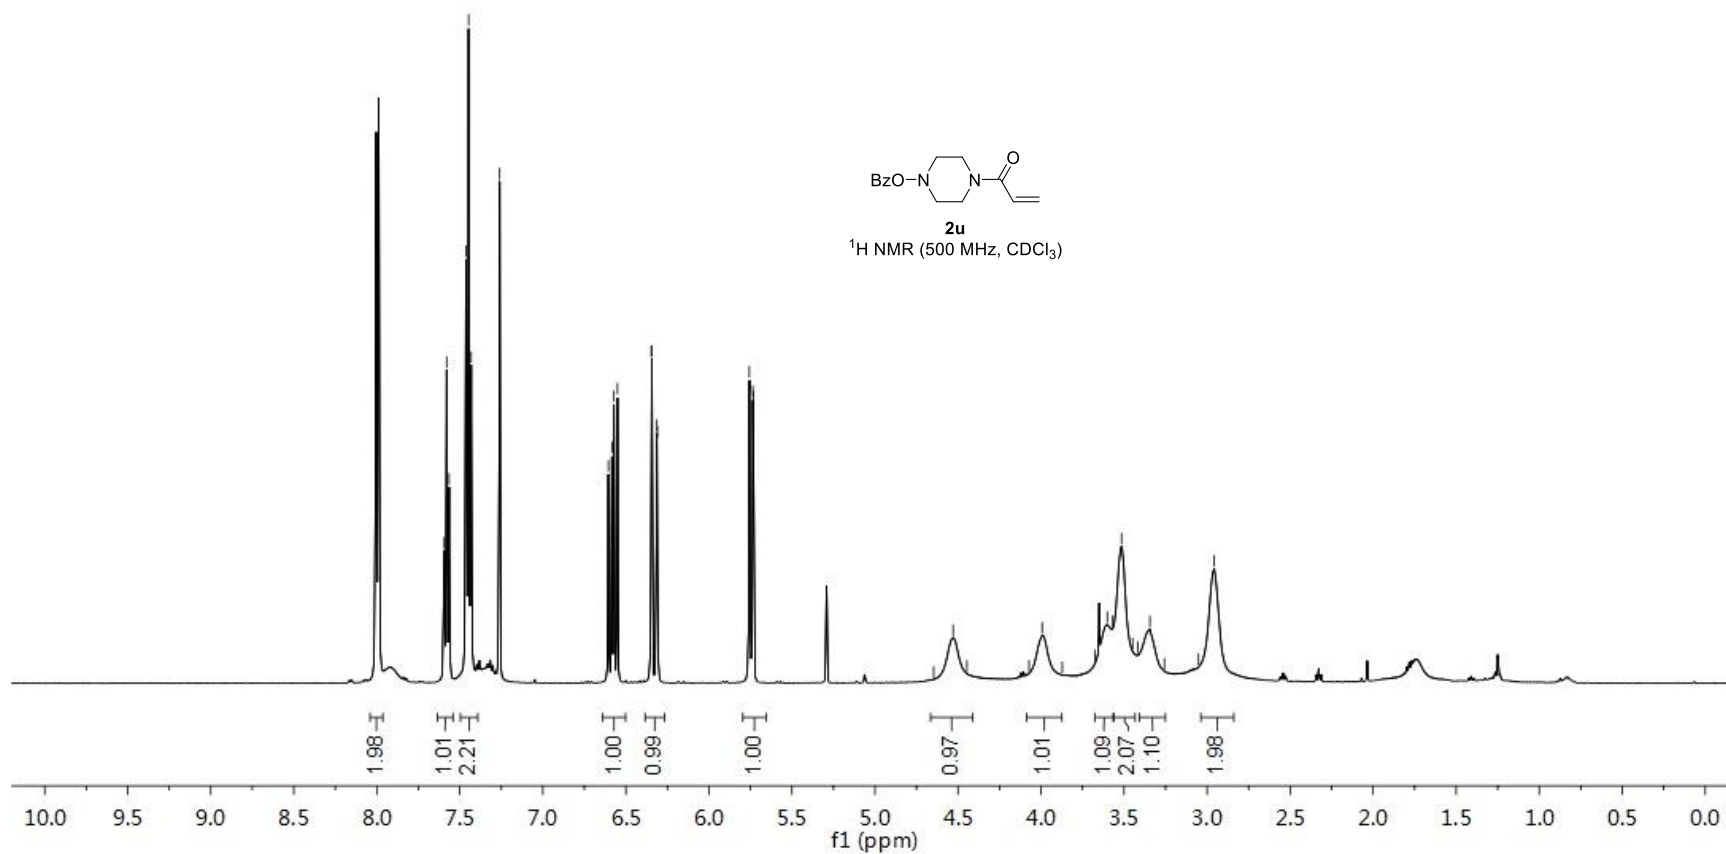

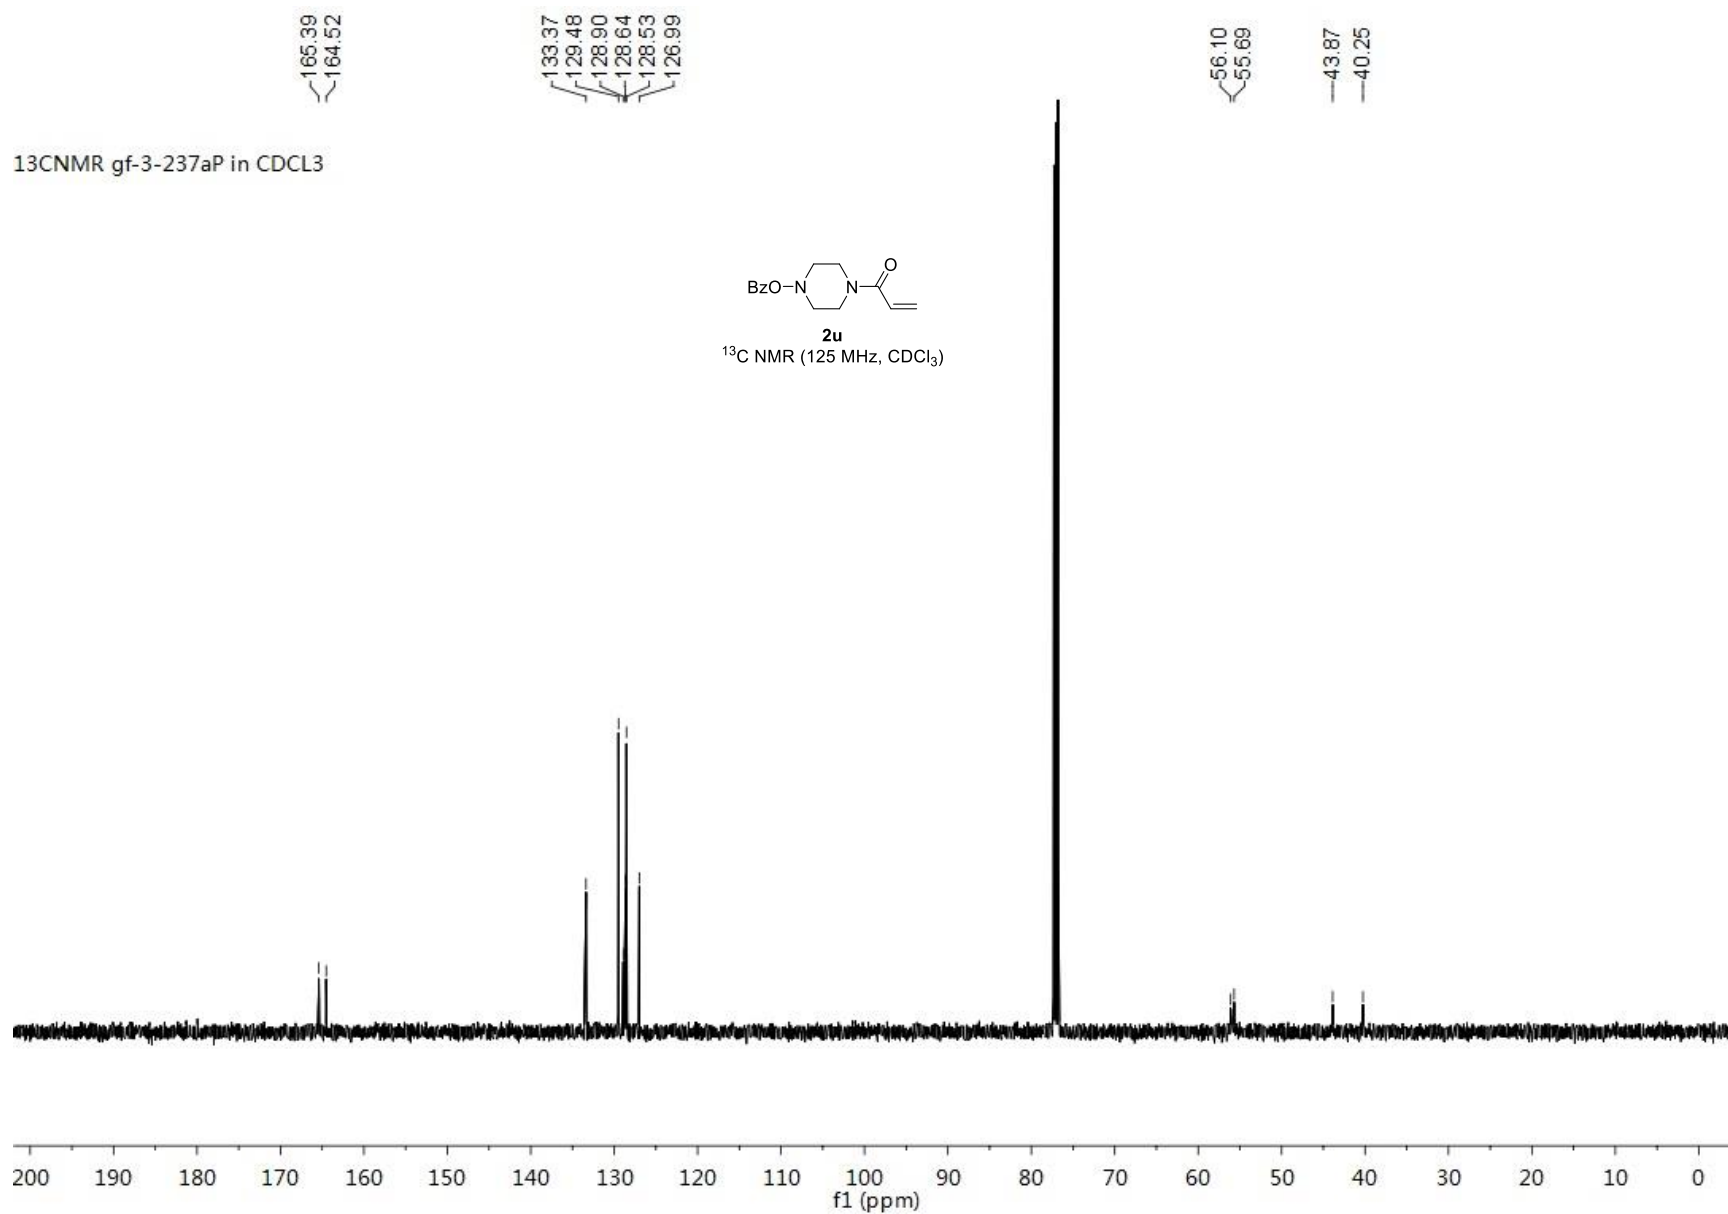

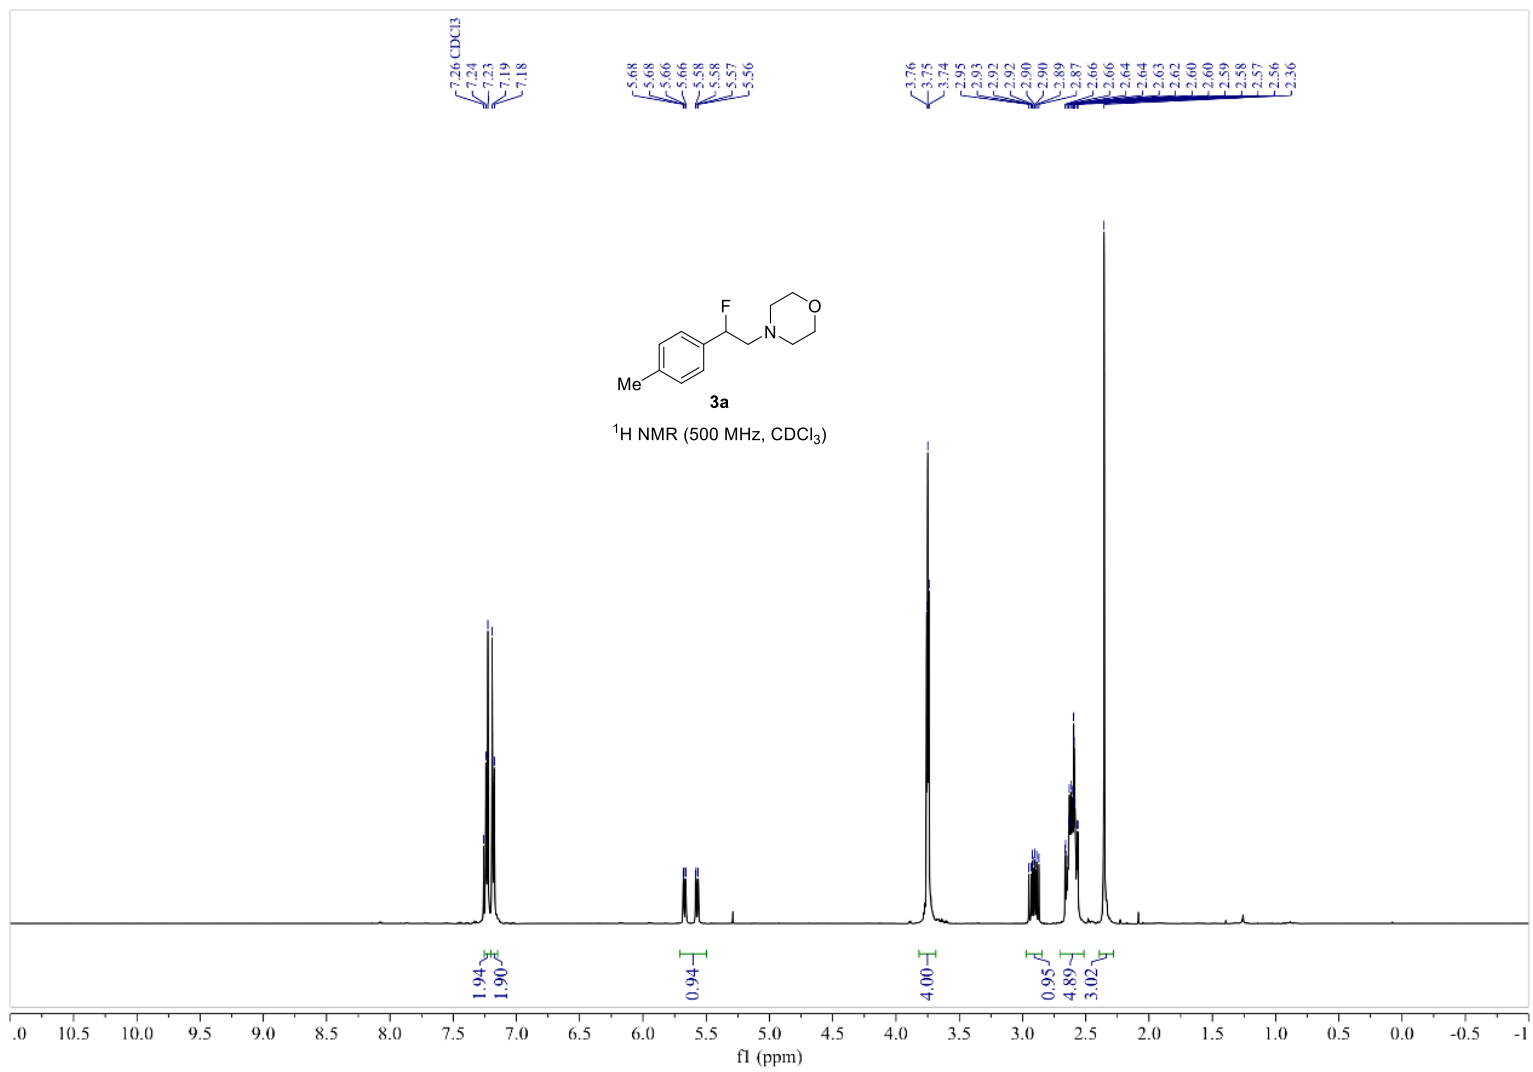

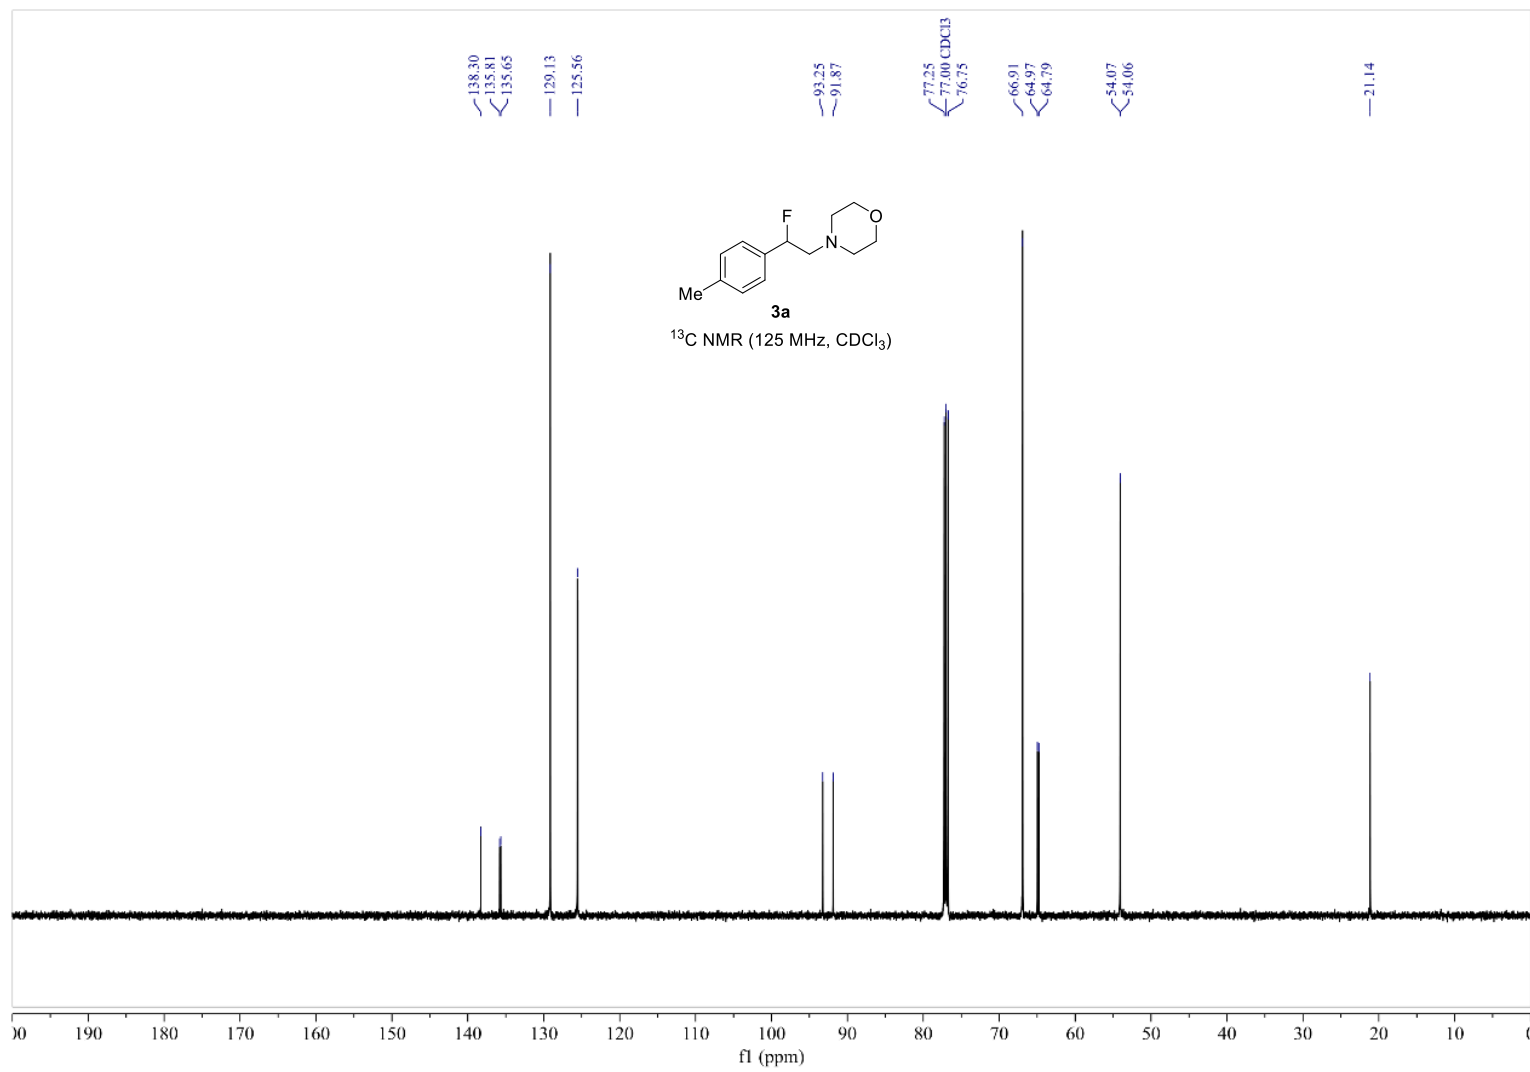

<sup>19</sup>F NMR gf-3-32a P in CDCl<sub>3</sub>

---175.1088

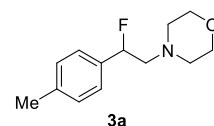

<sup>19</sup>F NMR (471 MHz, CDCl<sub>3</sub>)

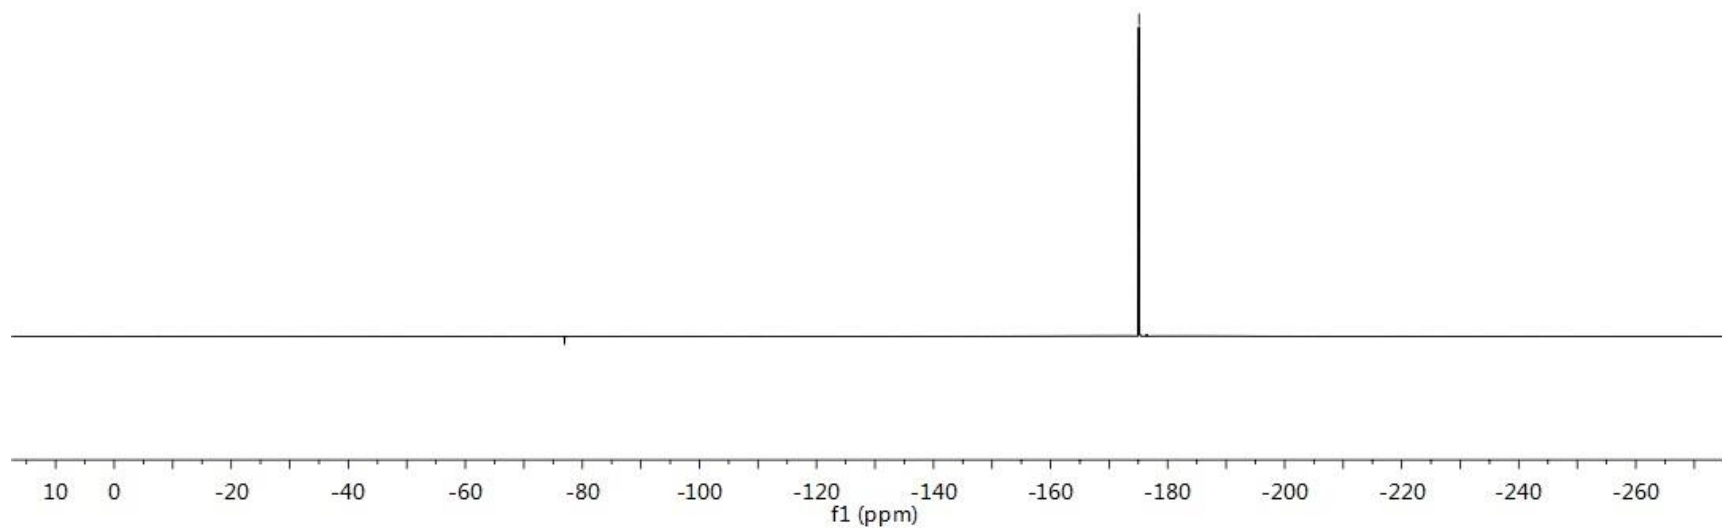

7.3240  
7.3087  
7.2954  
7.2775  
7.2631  
7.2498  
7.1893

5.6557  
5.6512  
5.6381  
5.6336  
5.5579  
5.5534  
5.5403  
5.5358

3.6945  
3.6852  
3.6759  
2.8869  
2.8693  
2.8584  
2.8522  
2.8408  
2.8345  
2.8237  
2.8061  
2.6272  
2.6223  
2.5986  
2.5938  
2.5881  
2.5736  
2.5647  
2.5585  
2.5536  
2.5492  
2.5392  
2.5300  
2.5256  
2.5165  
2.5075

<sup>1</sup>H NMR of gf-ck-II-56aP in CDCl<sub>3</sub>

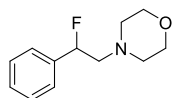

**3b**

<sup>1</sup>H NMR (500 MHz, CDCl<sub>3</sub>)

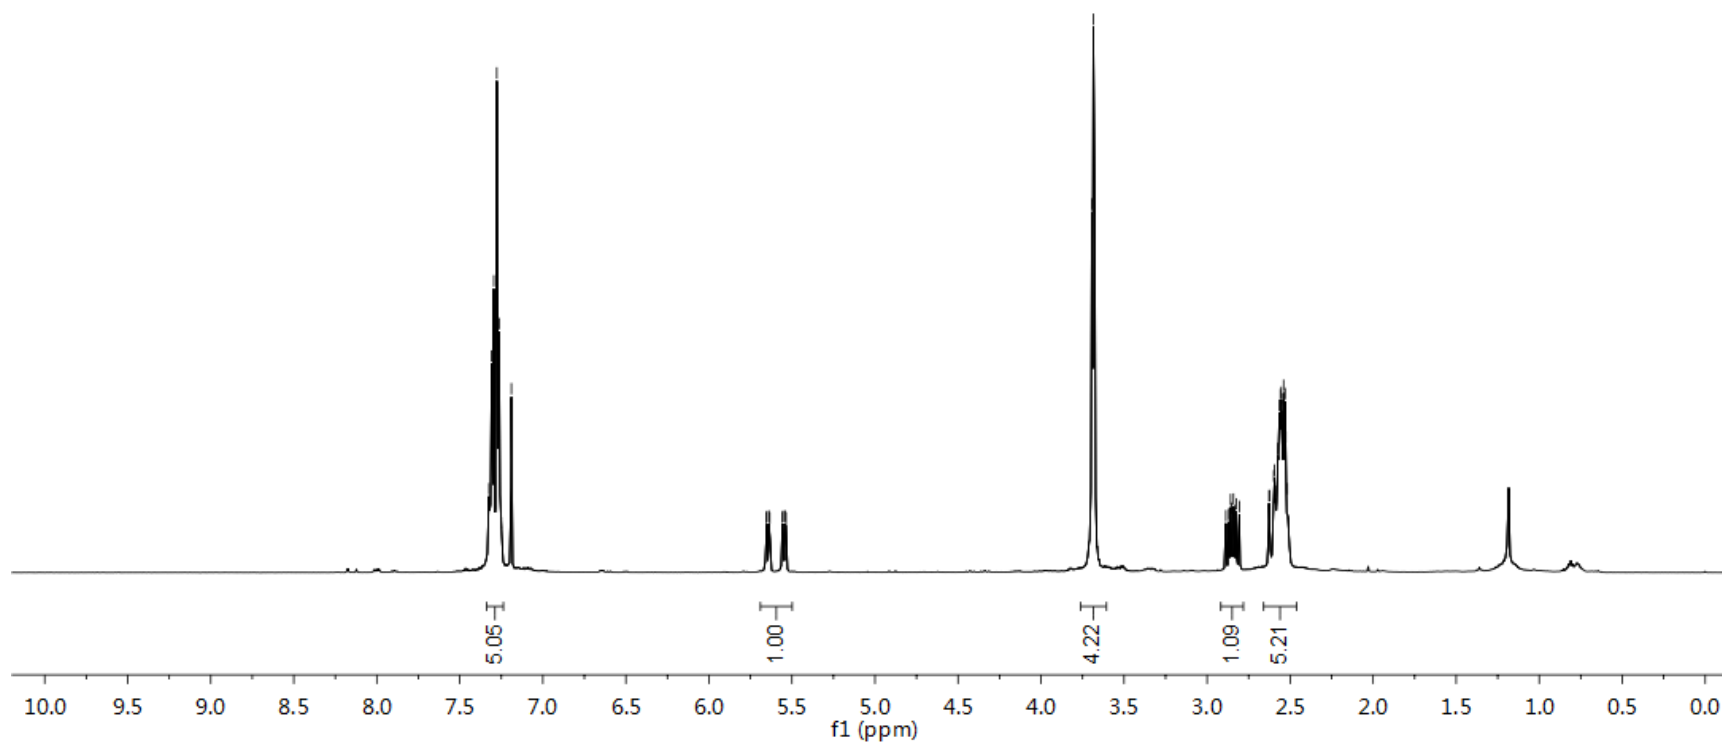

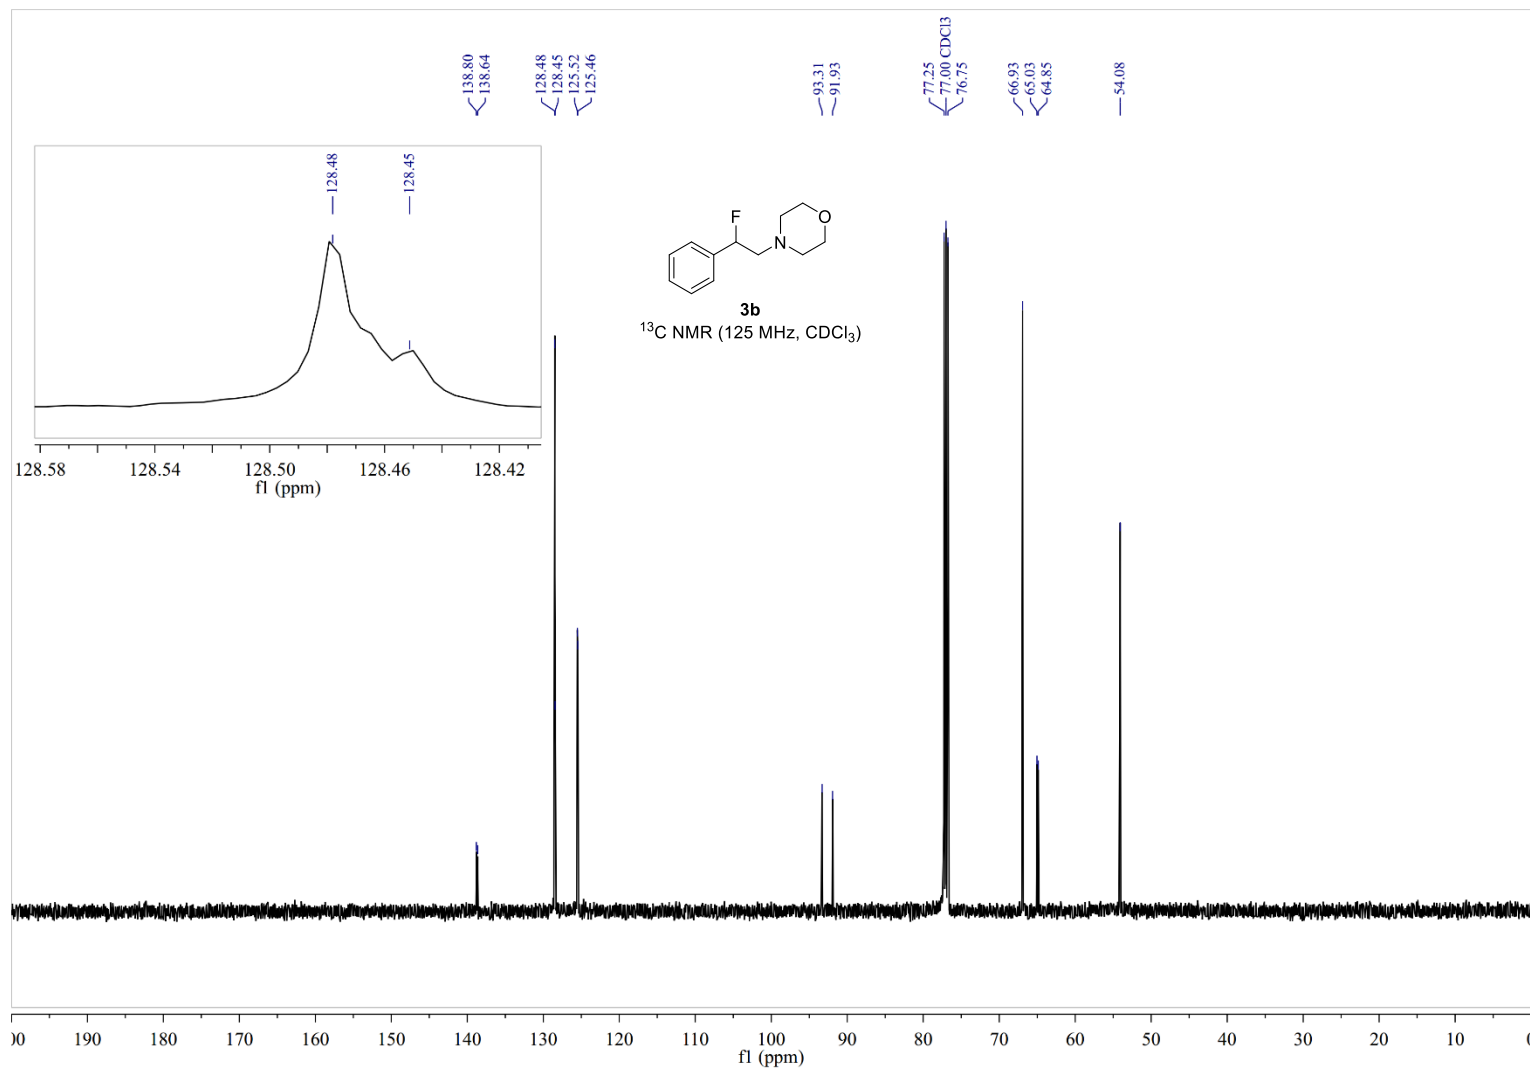



<sup>19</sup>F NMR gf-ck-II-56aP in CDCl<sub>3</sub>

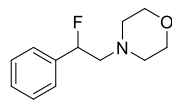

**3b**

<sup>19</sup>F NMR (471 MHz, CDCl<sub>3</sub>)

— -176.9016

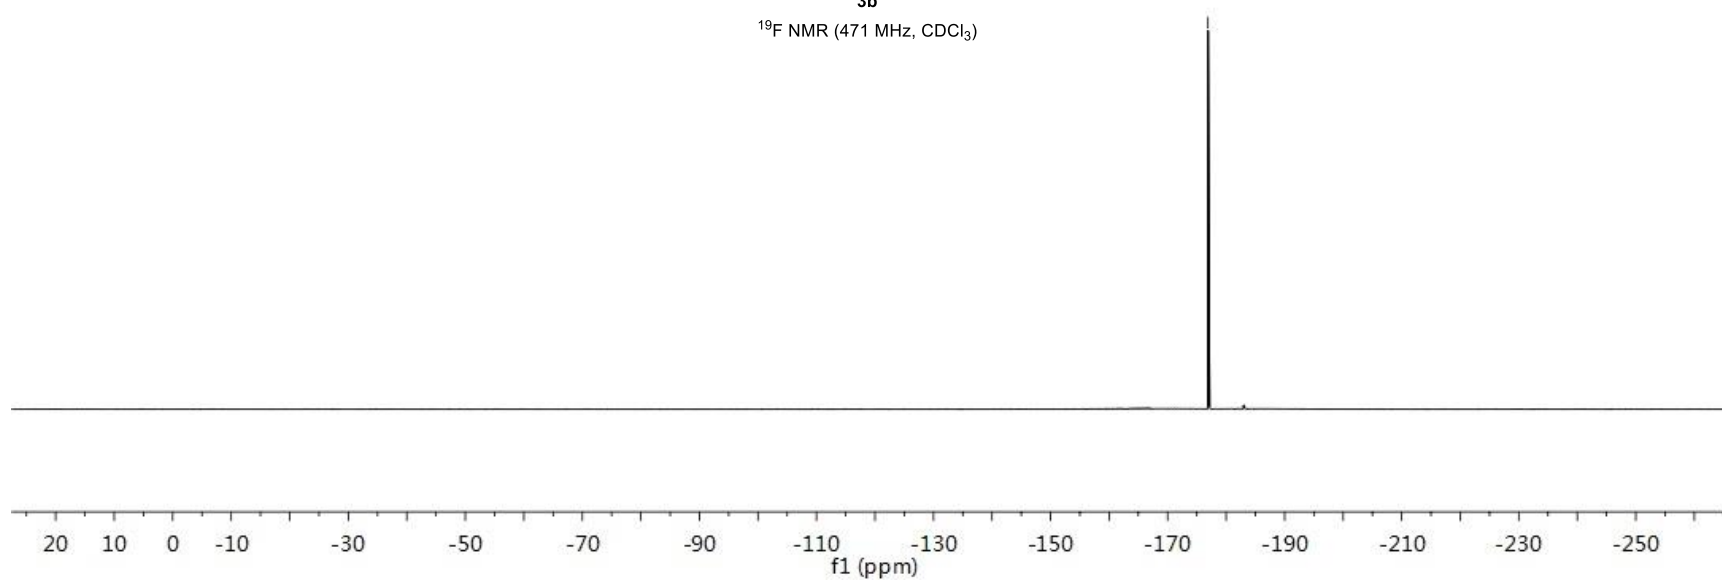

<sup>1</sup>H NMR of gf-3-34cP in CDCl<sub>3</sub>

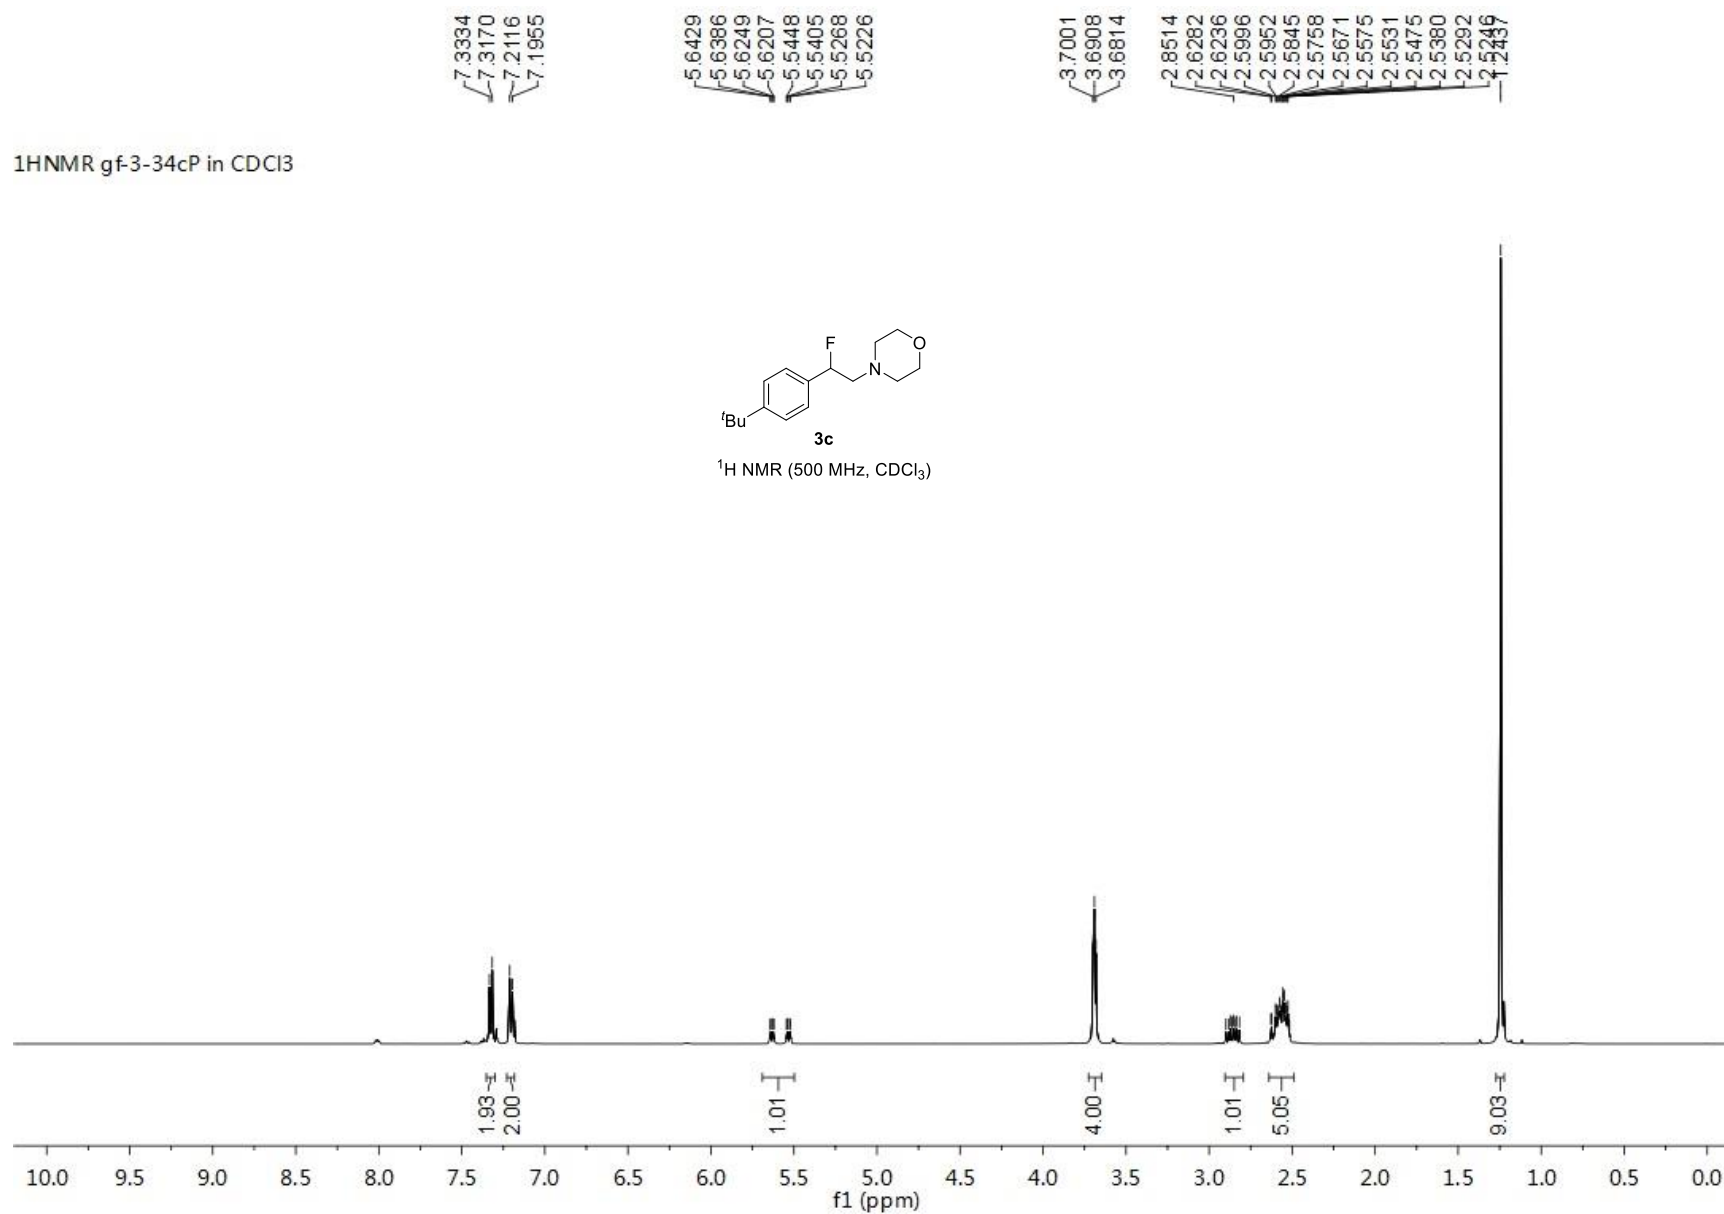

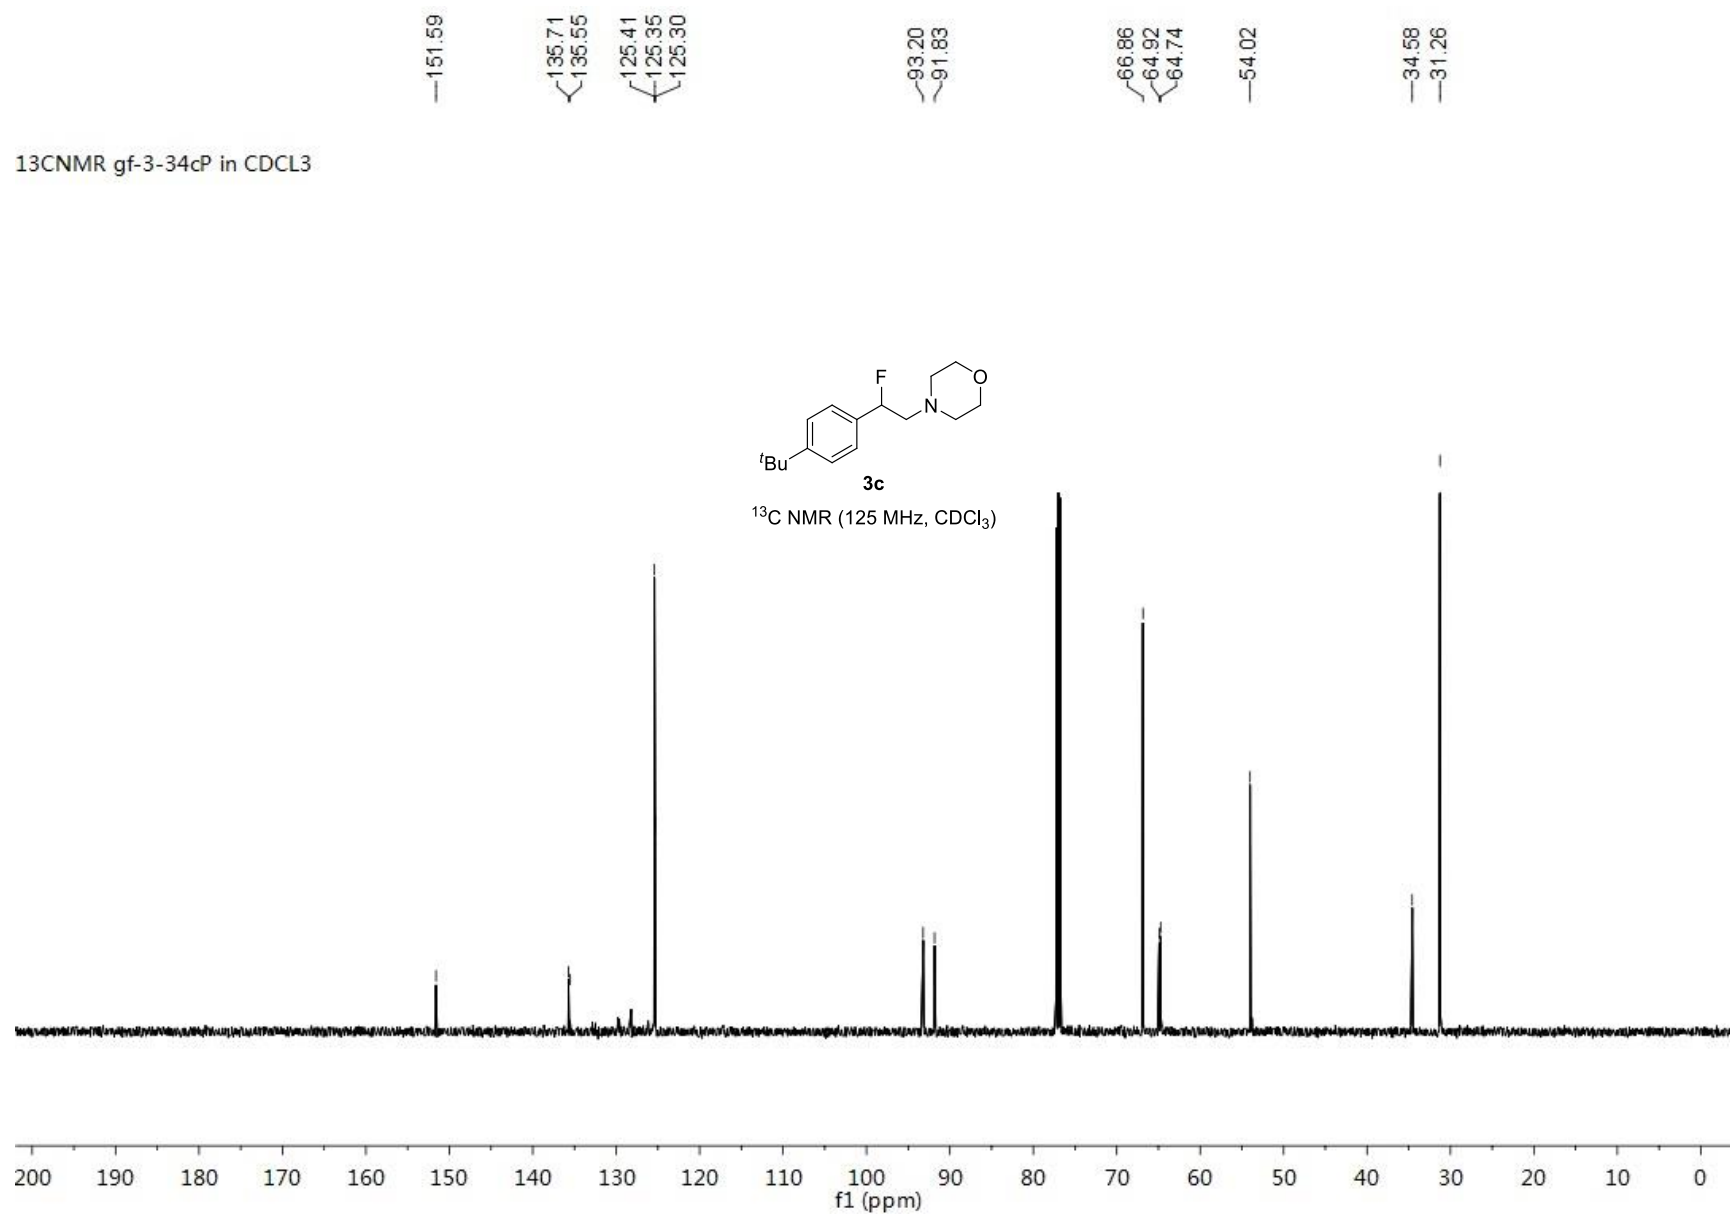

$^{19}\text{F}$ NMR gf-3-34cP in  $\text{CDCl}_3$

---175.1090

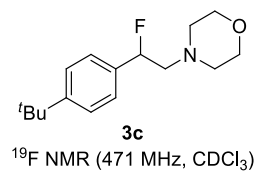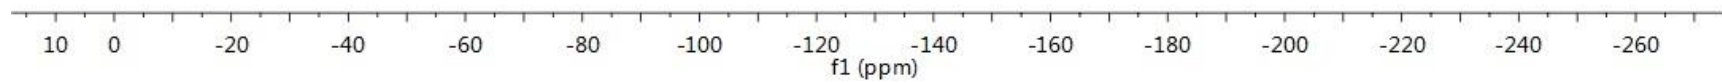

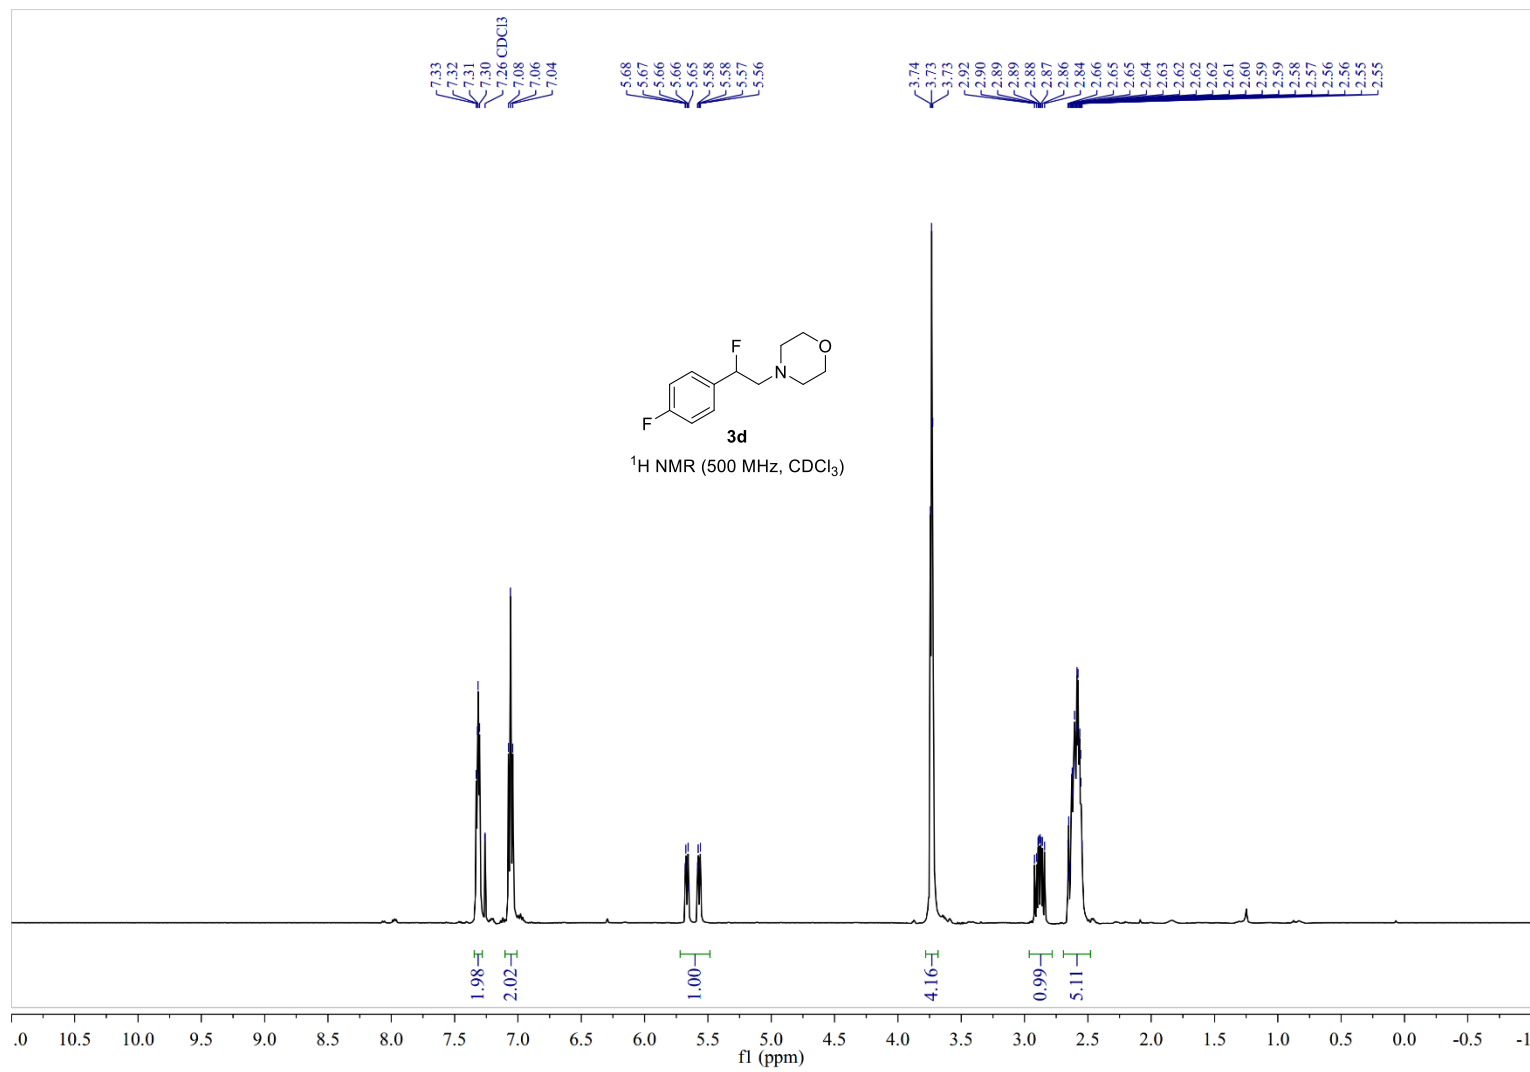

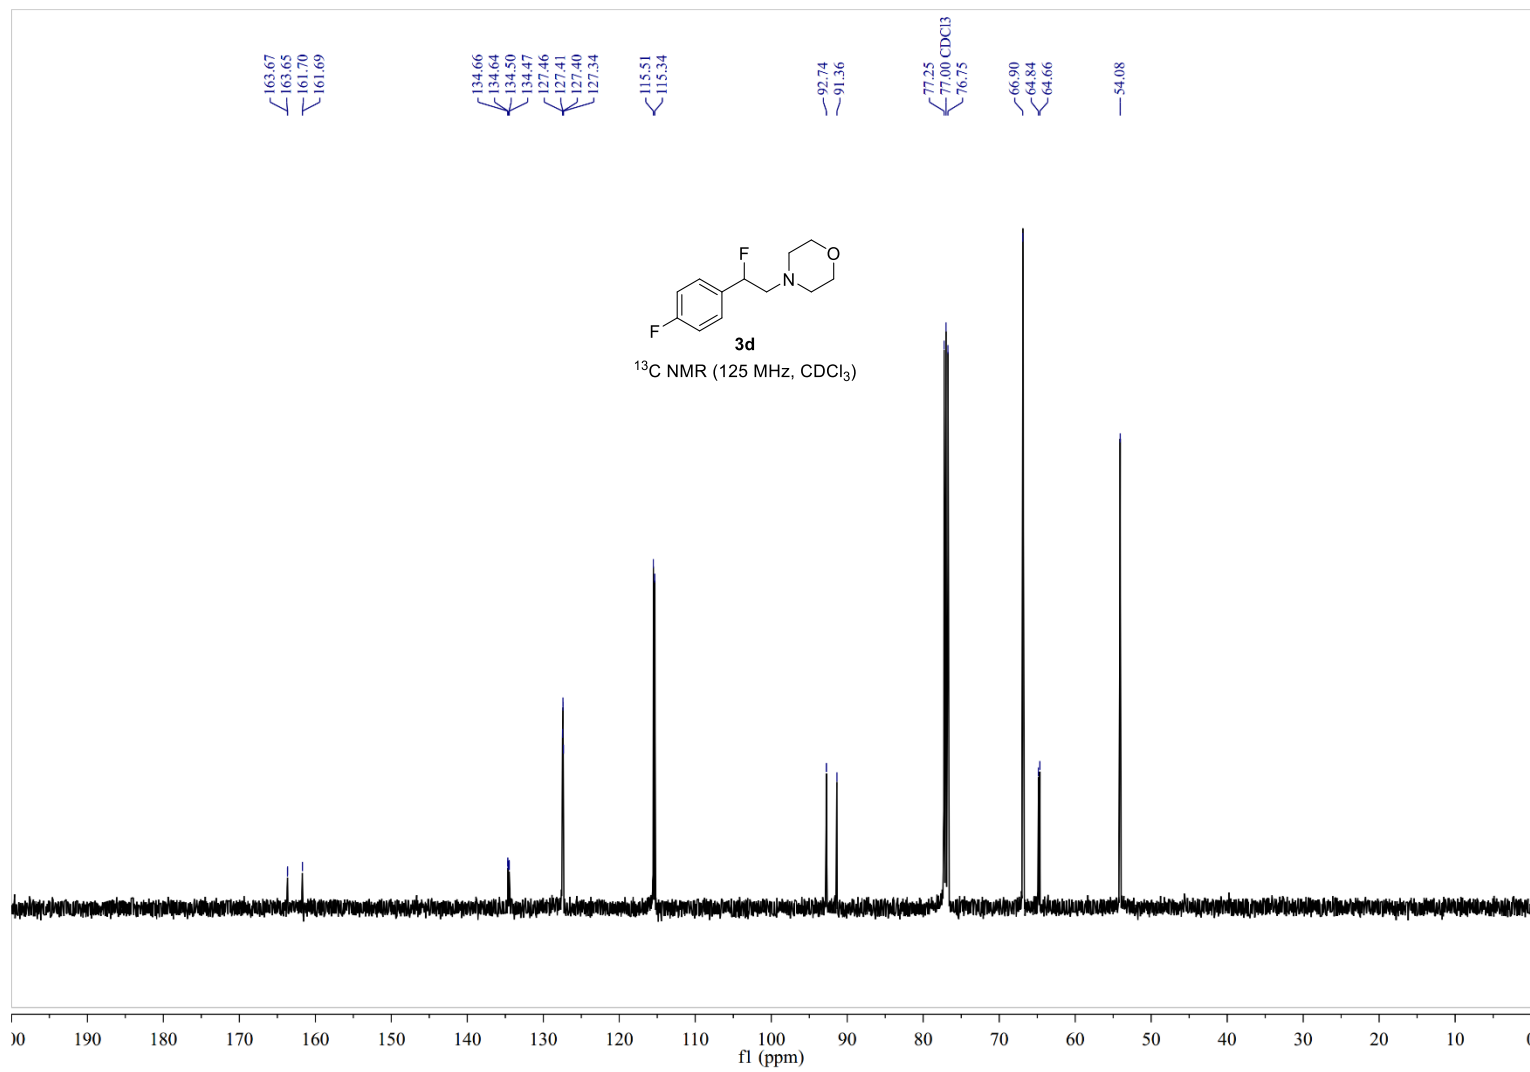

$^{19}\text{F}$ NMR gf-3-37bP in  $\text{CDCl}_3$

---113.3240

---175.0609

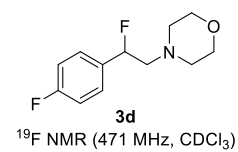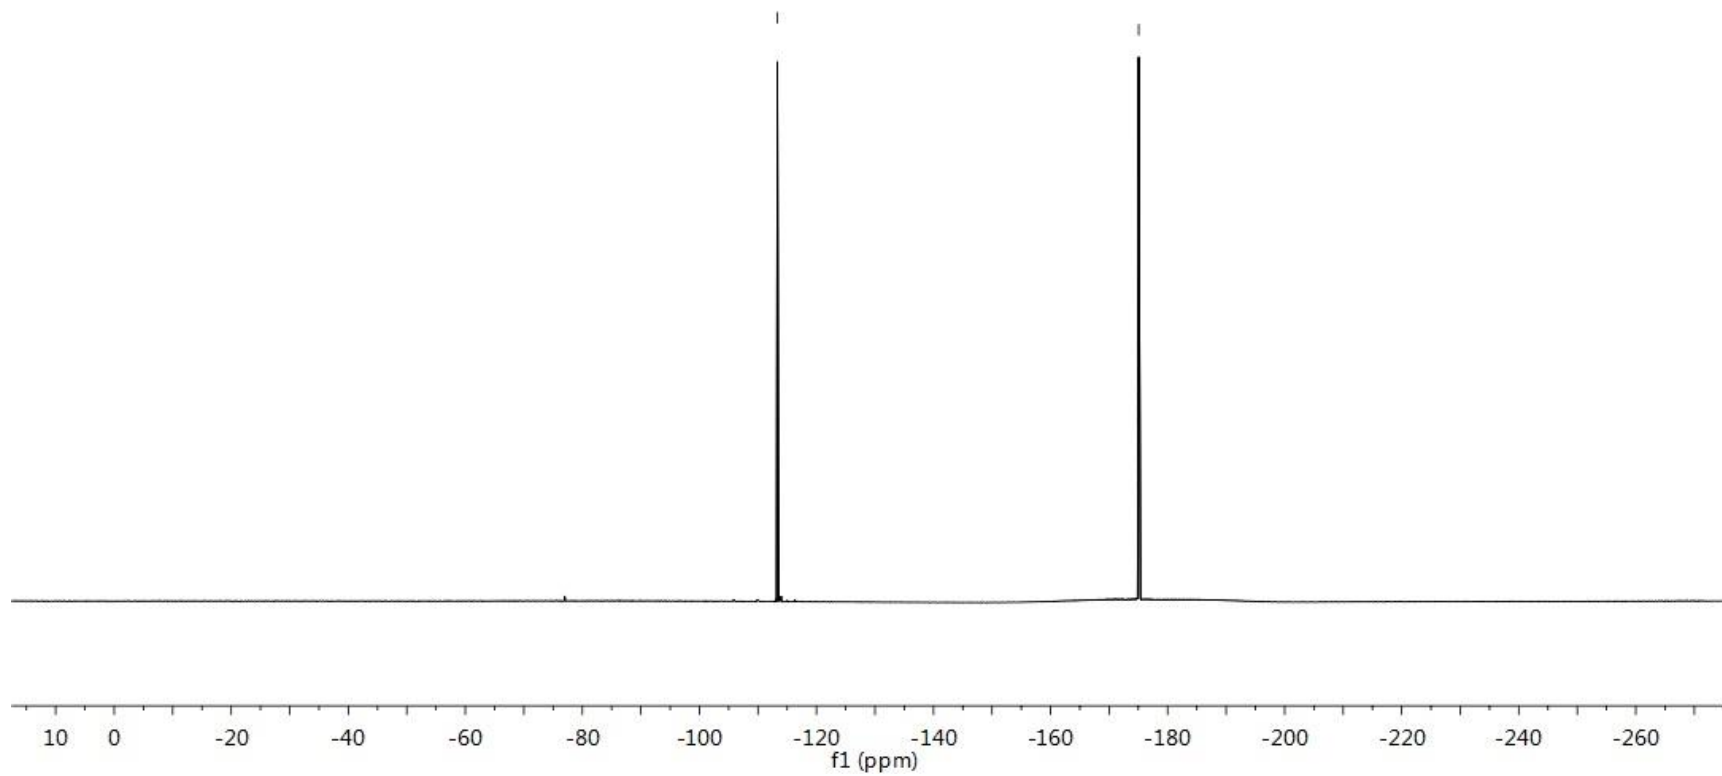

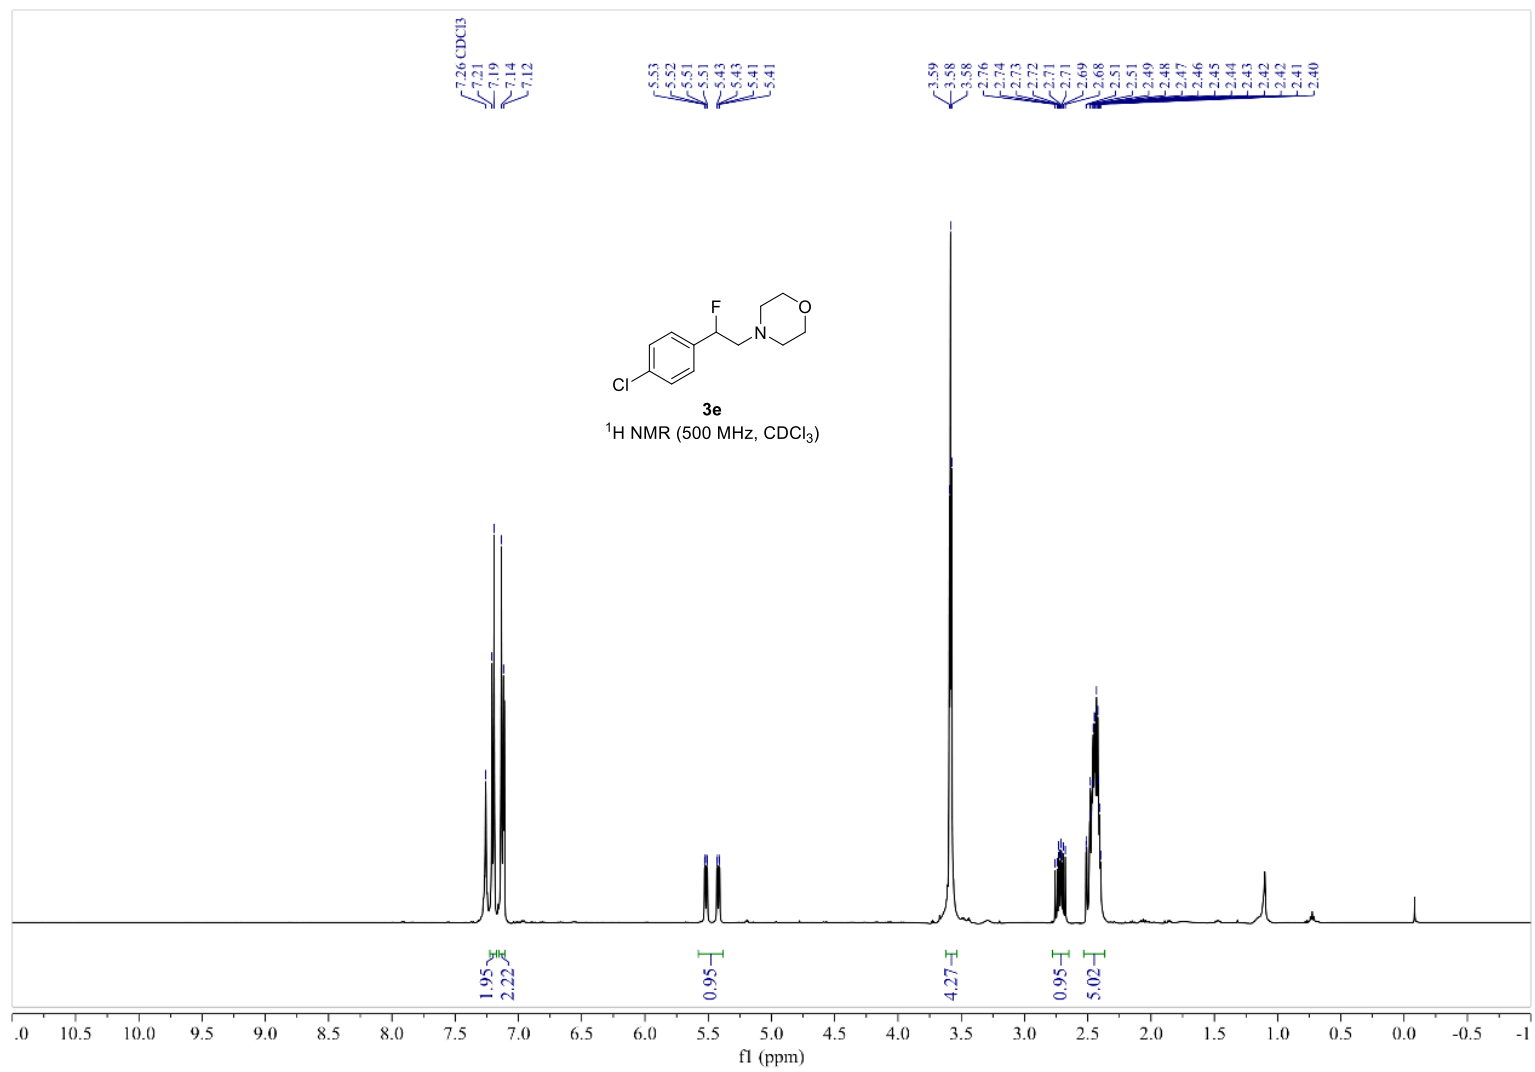



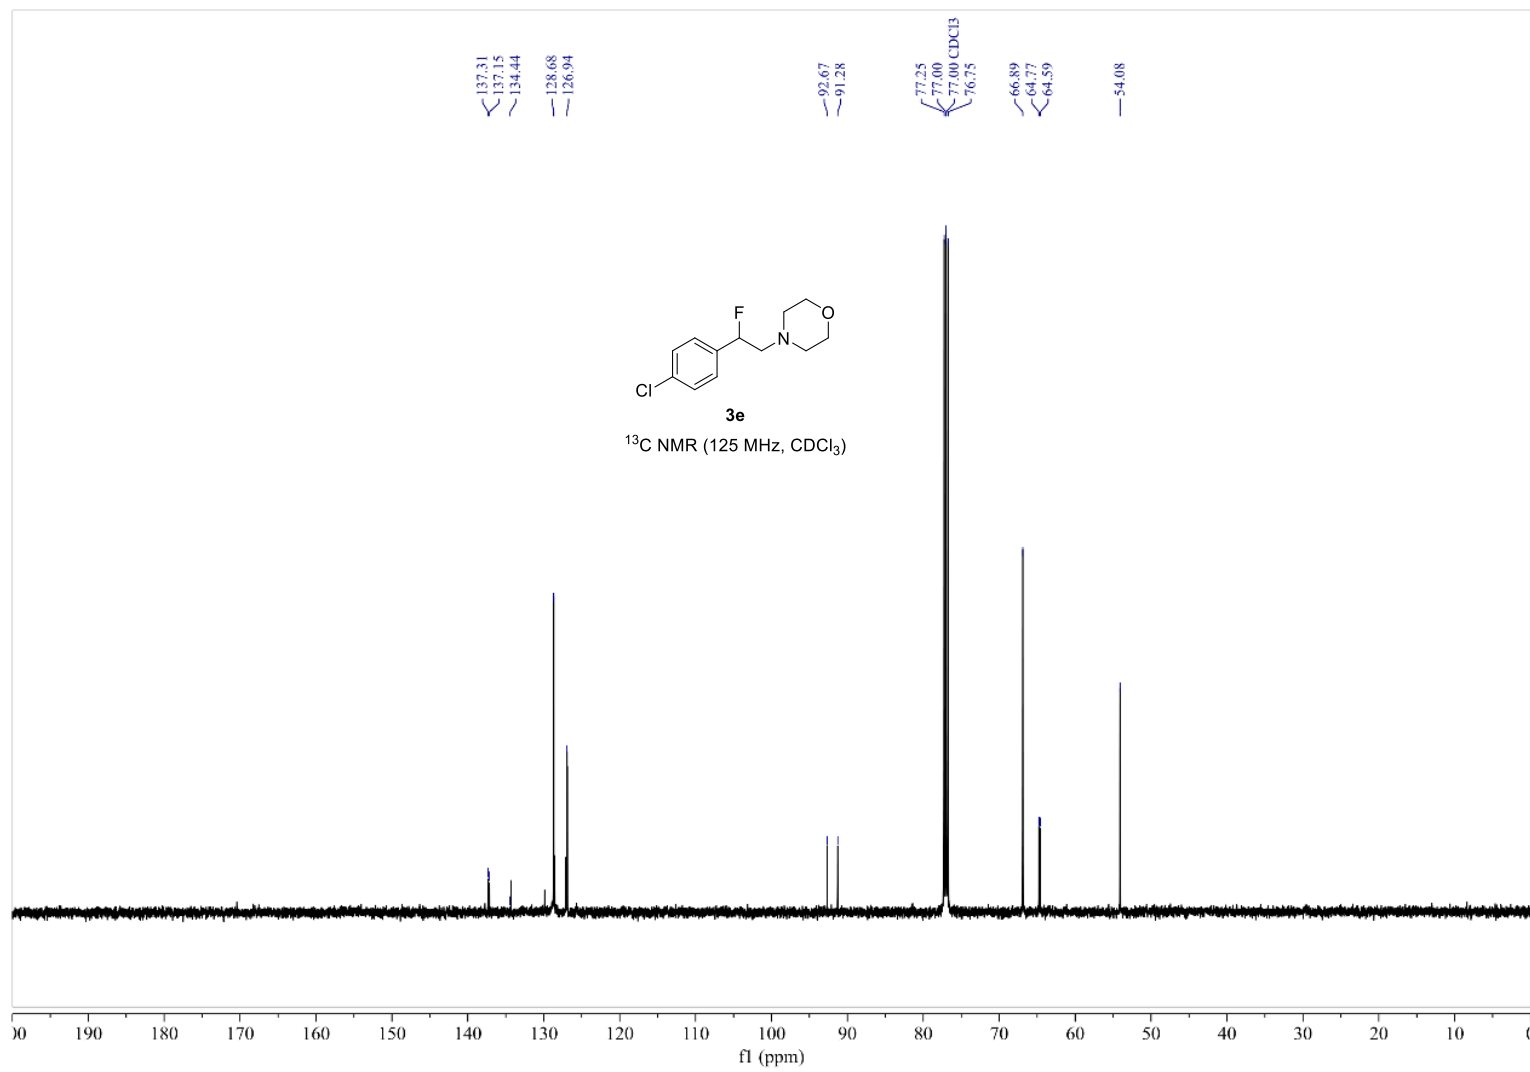

<sup>19</sup>F NMR gf-3-37cP in CDCl<sub>3</sub>

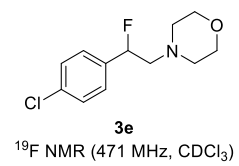

---177.2881

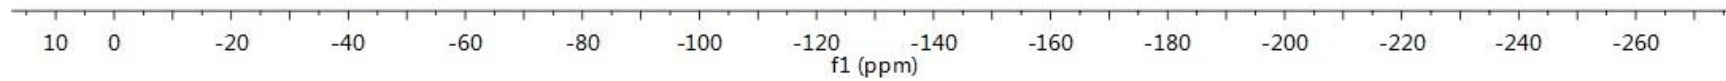

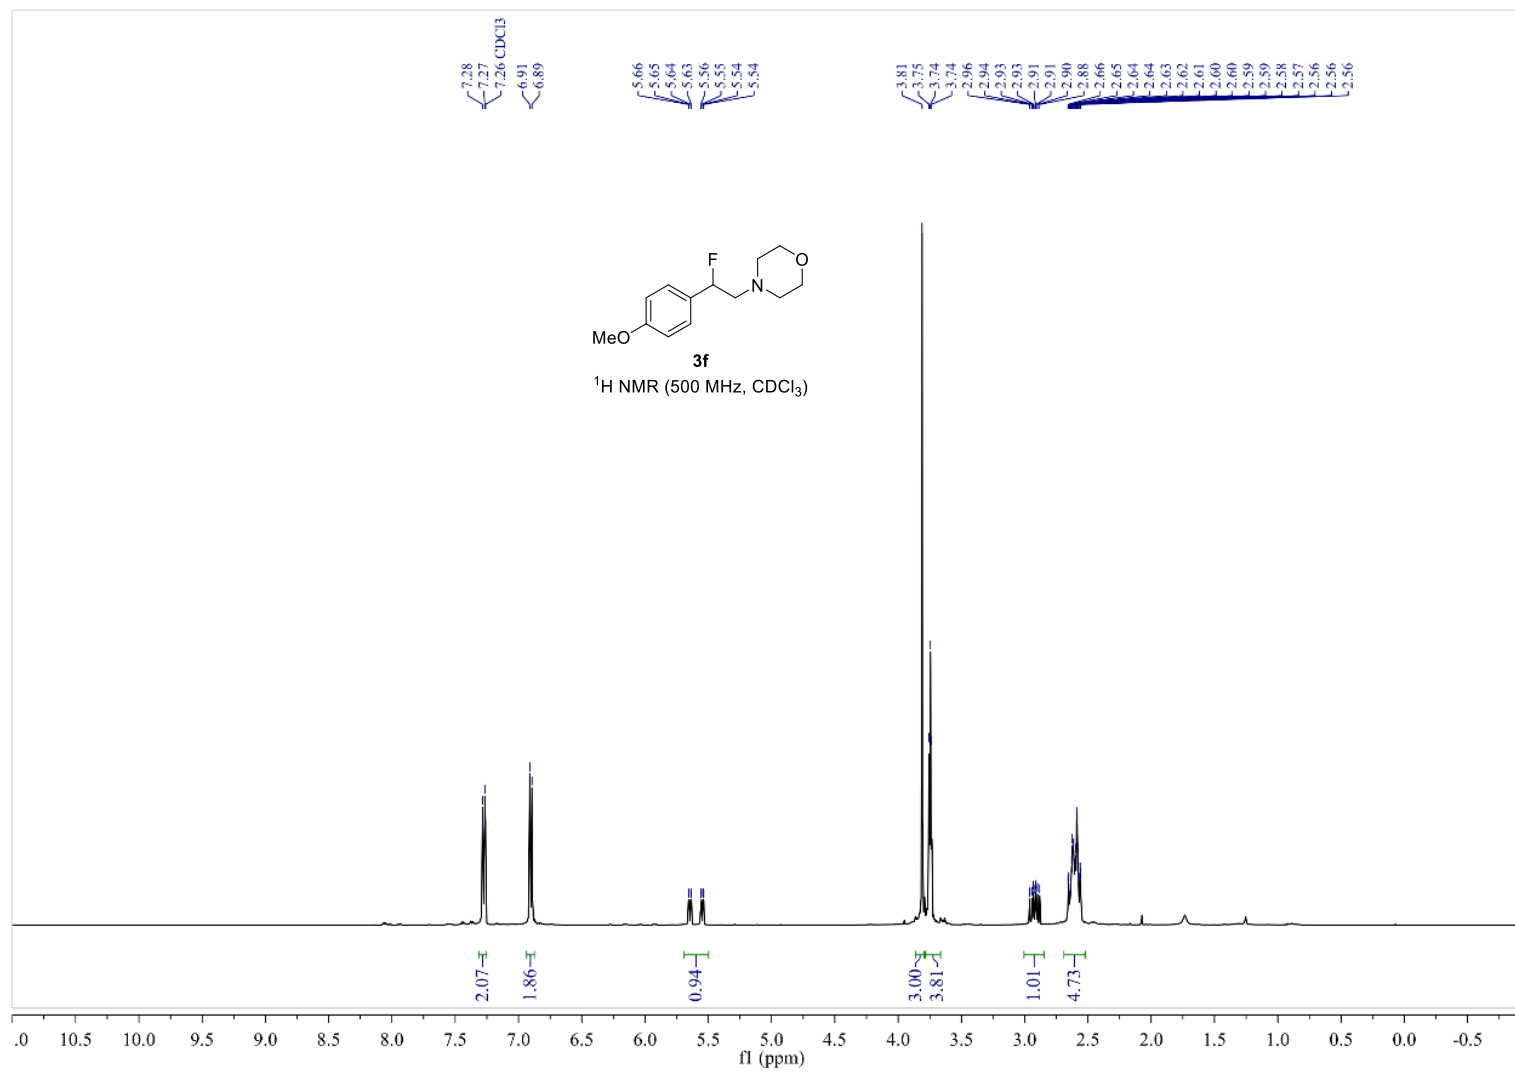

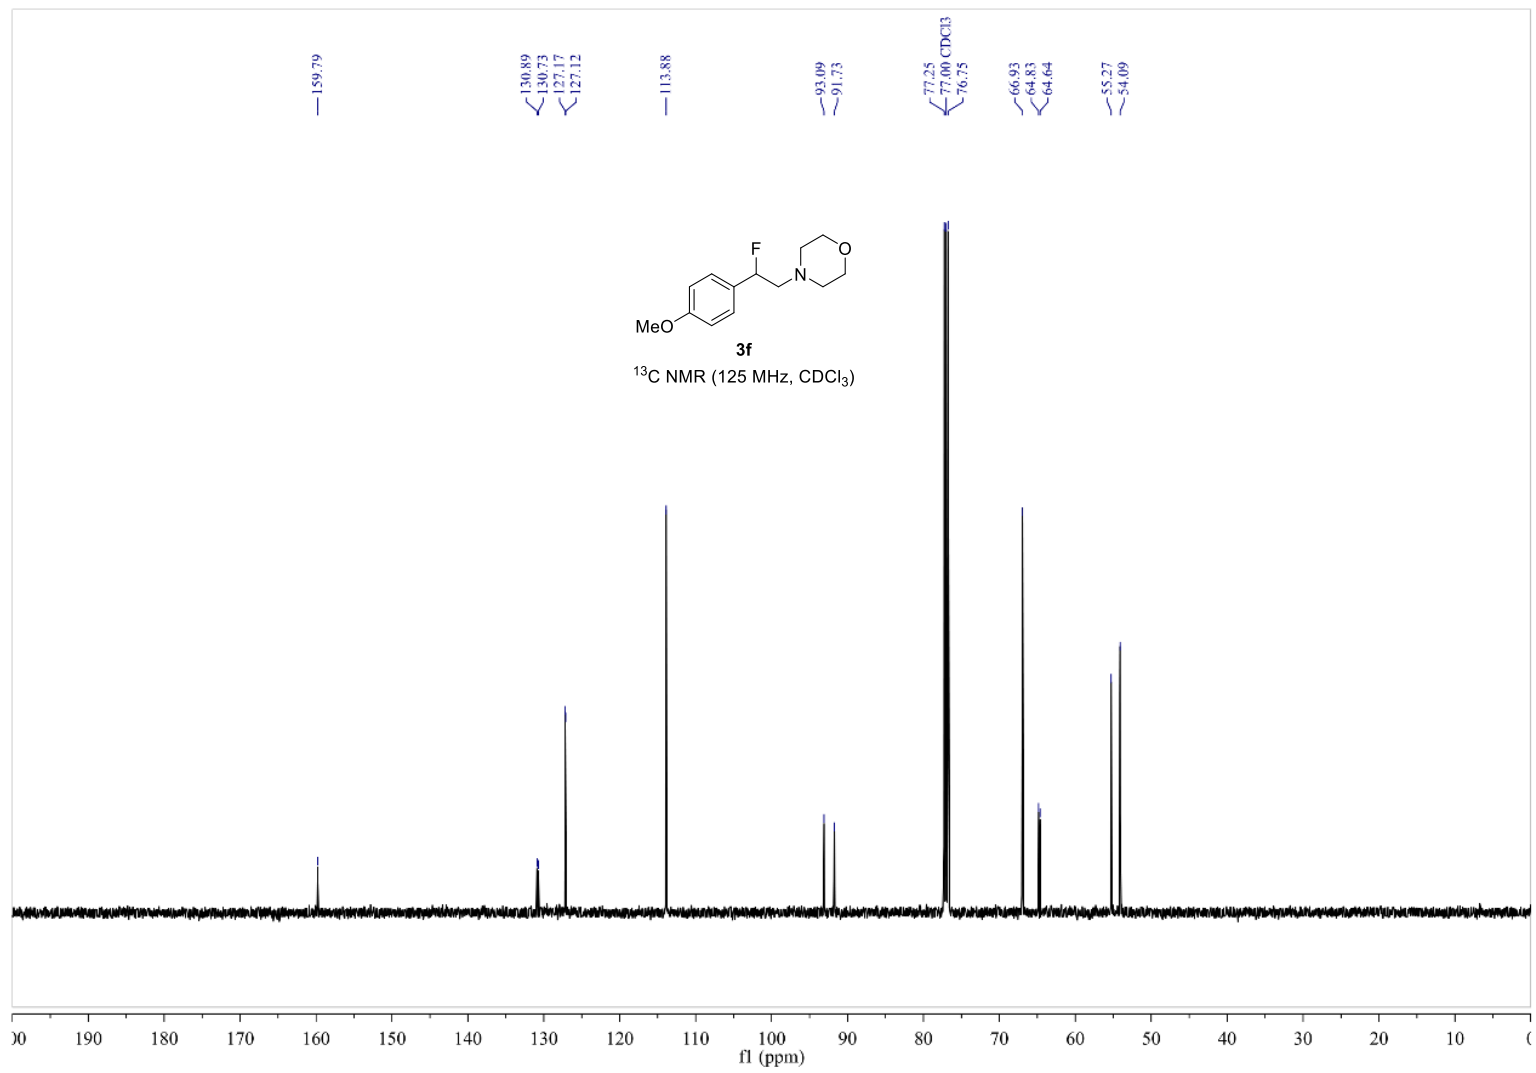

$^{19}\text{F}$ NMR gf-3-33bP in  $\text{CDCl}_3$

---172.1431

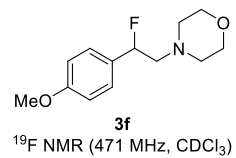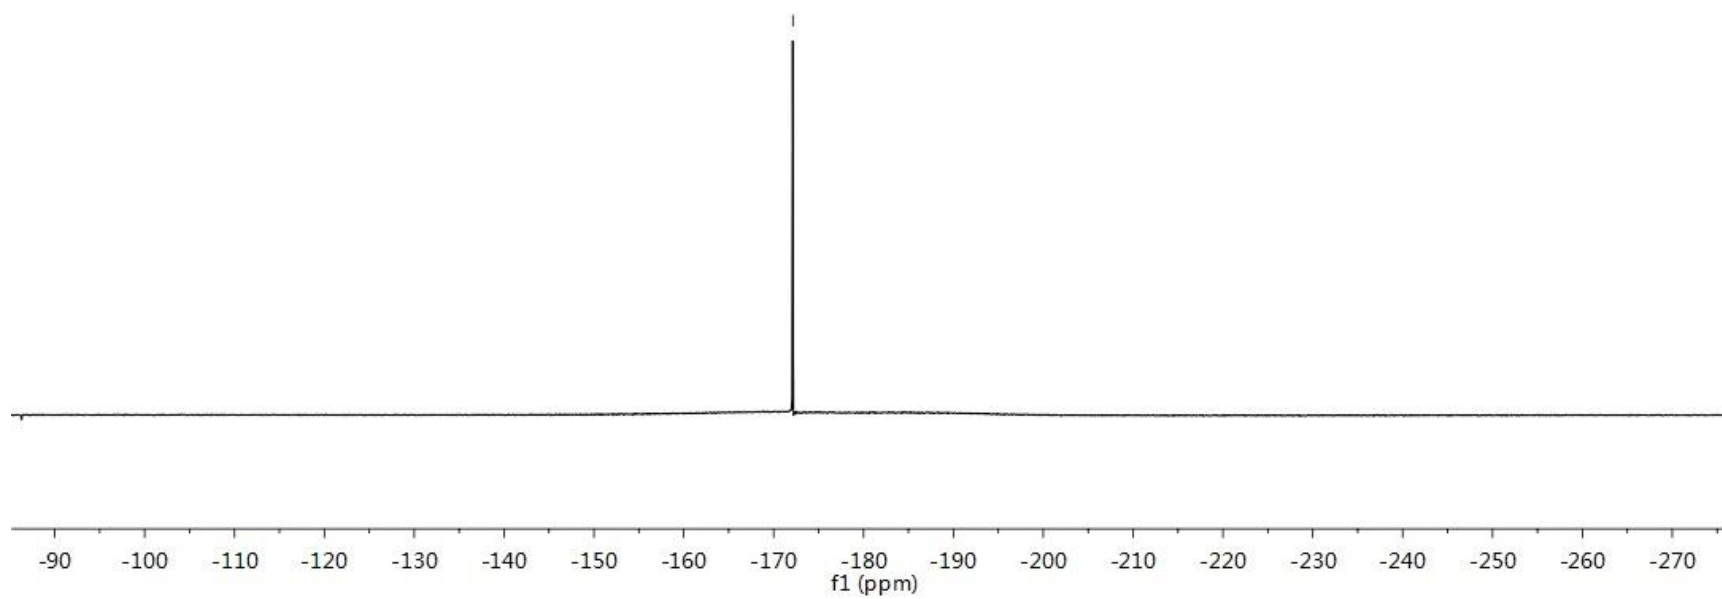

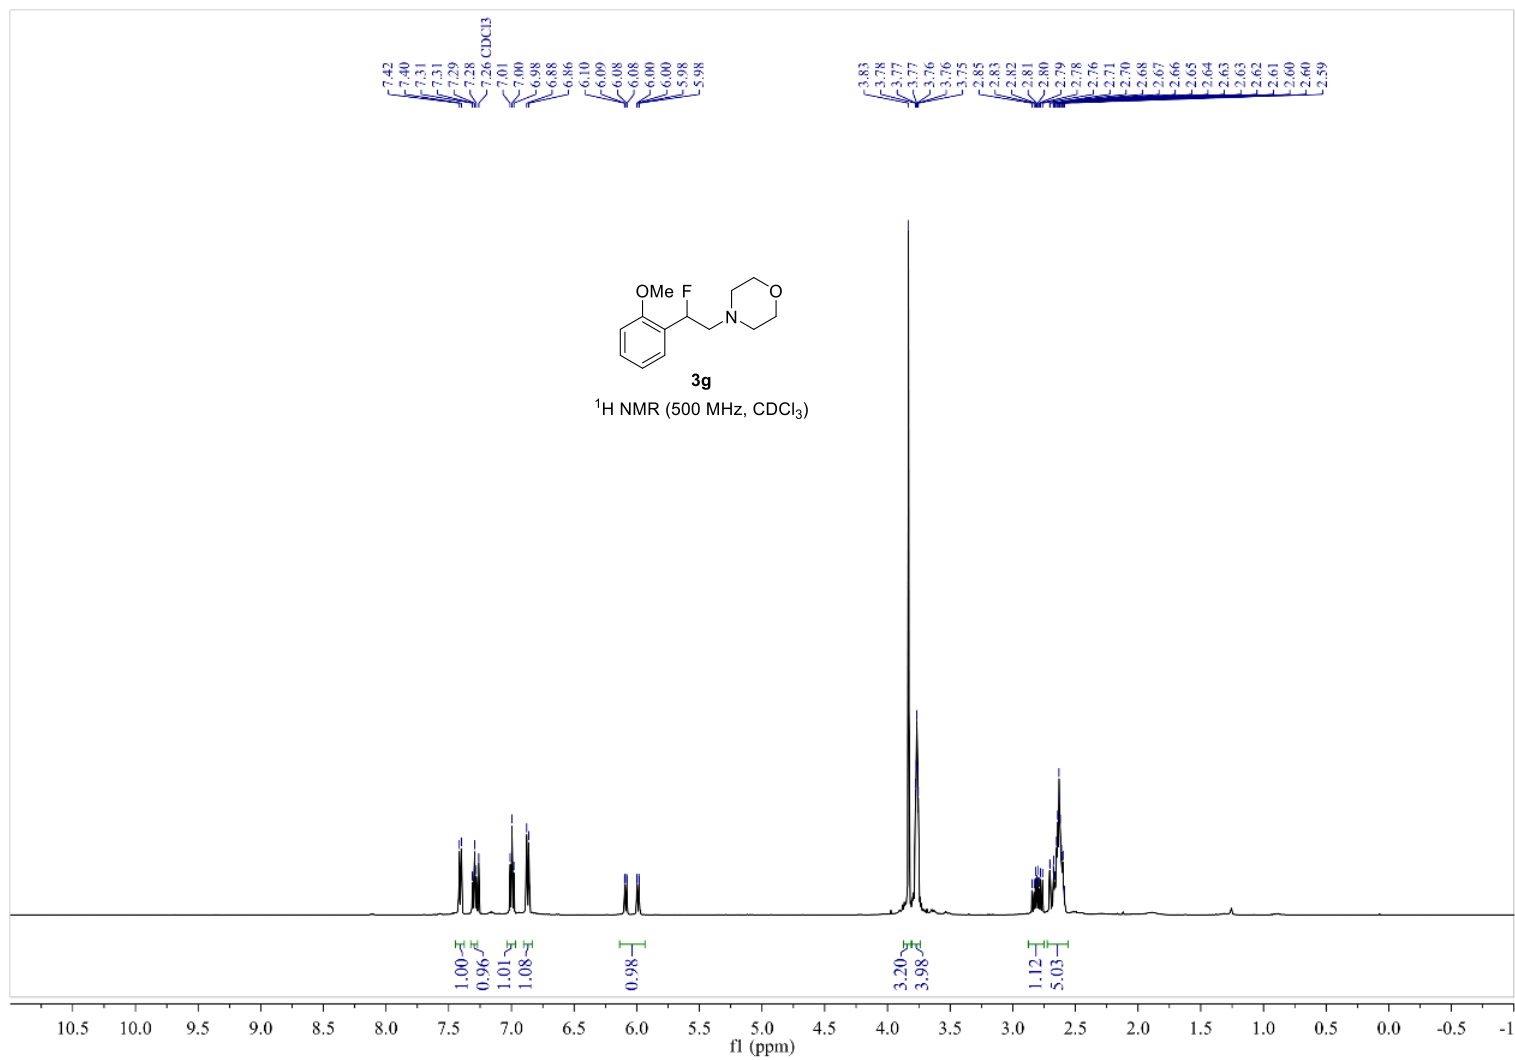

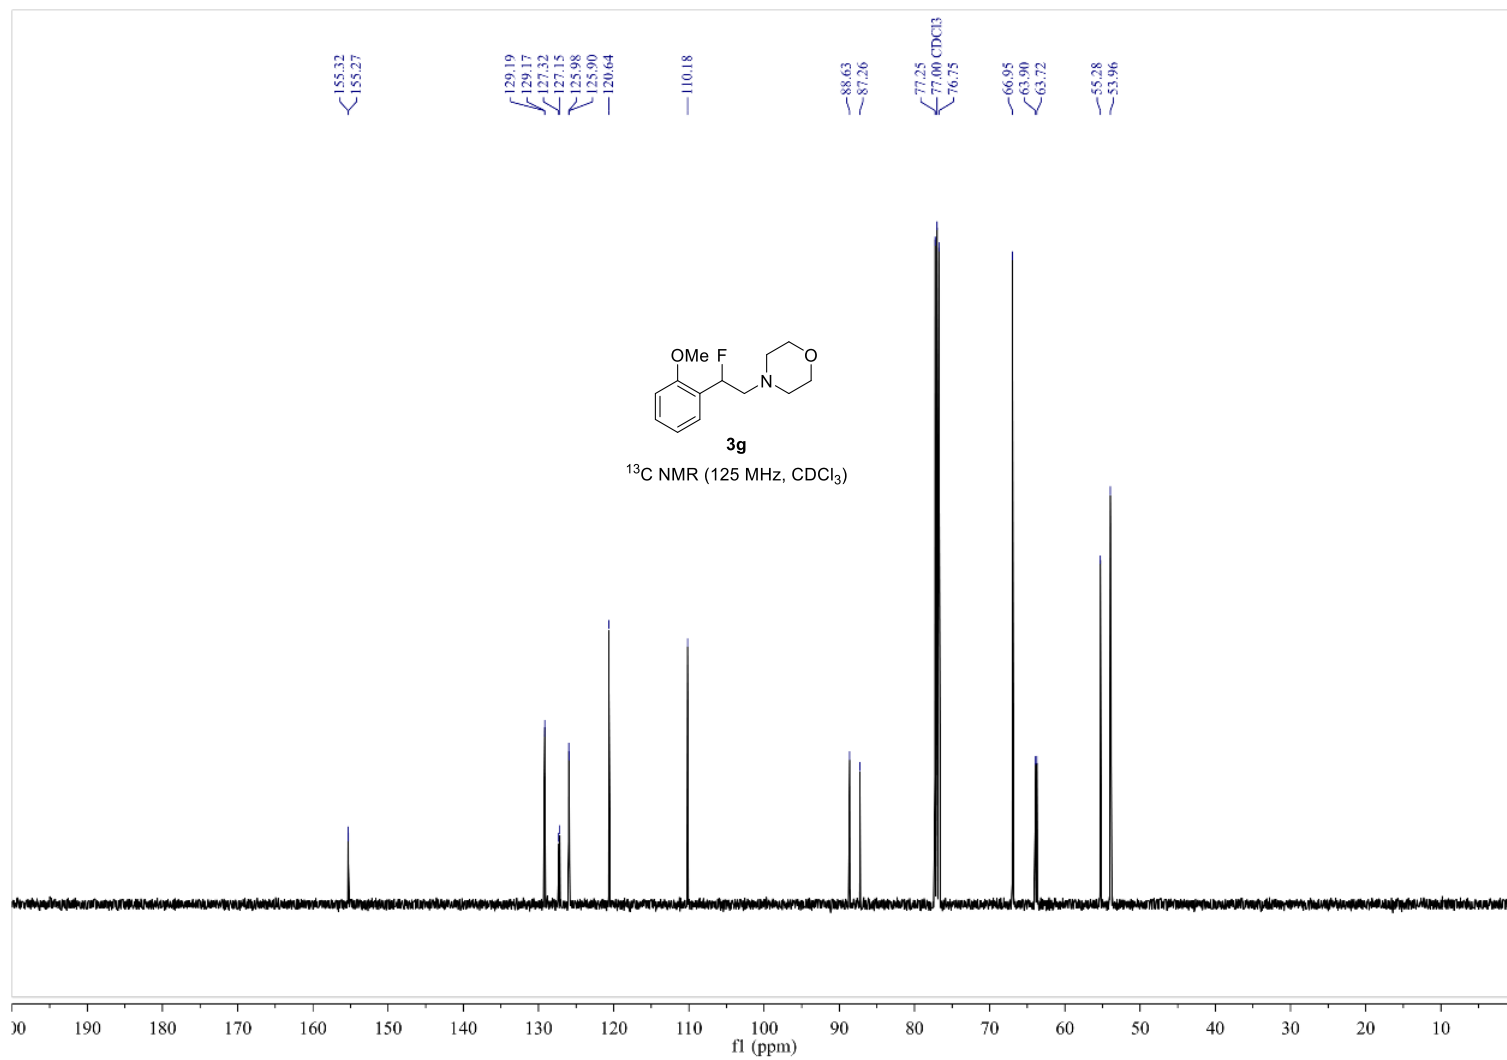

<sup>19</sup>F NMR gf-3-34bP in CDCl<sub>3</sub>

— 185.0007

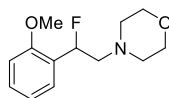

**3g**

<sup>19</sup>F NMR (471 MHz, CDCl<sub>3</sub>)

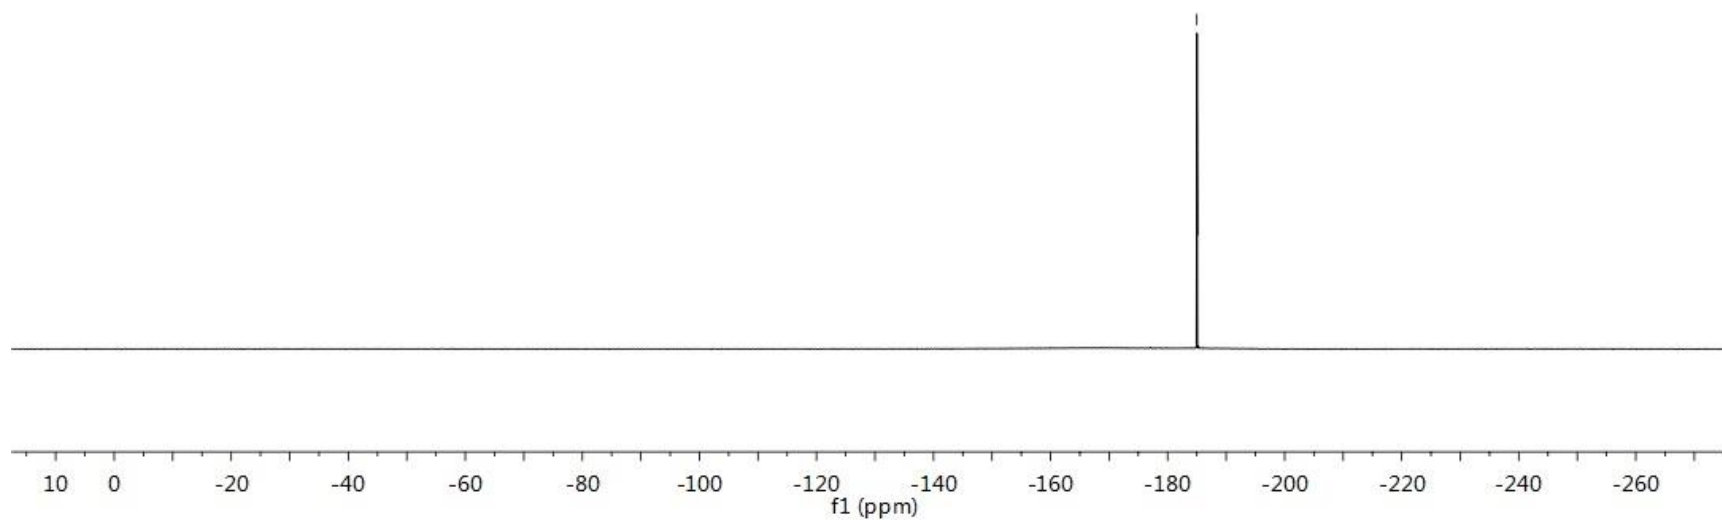



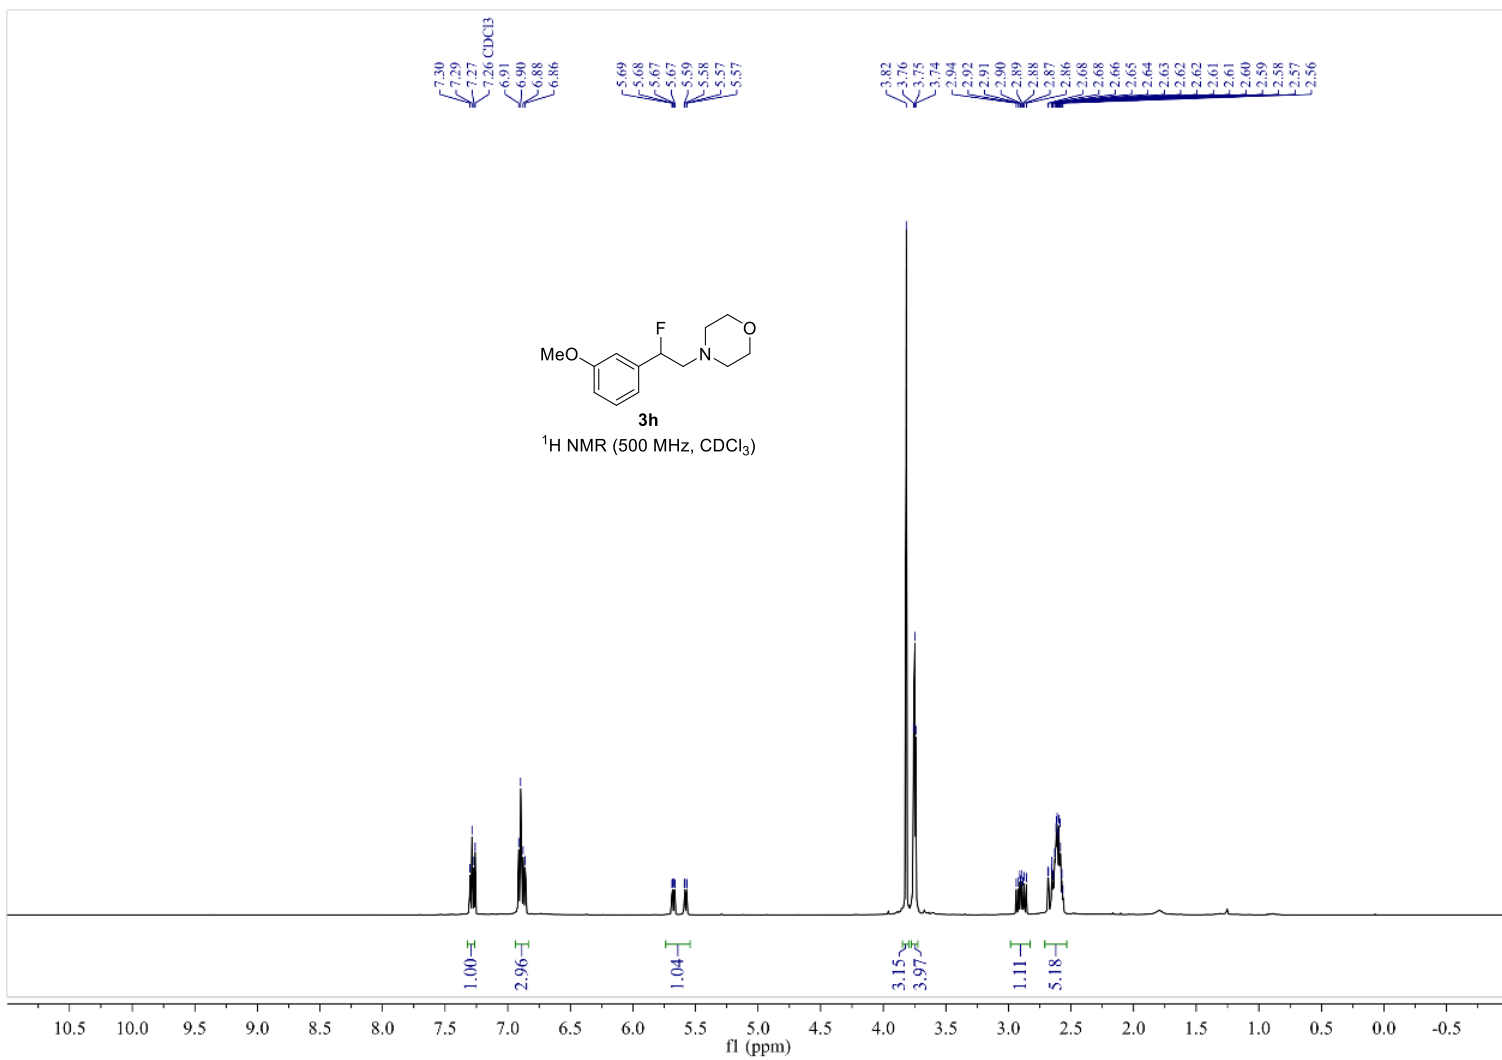

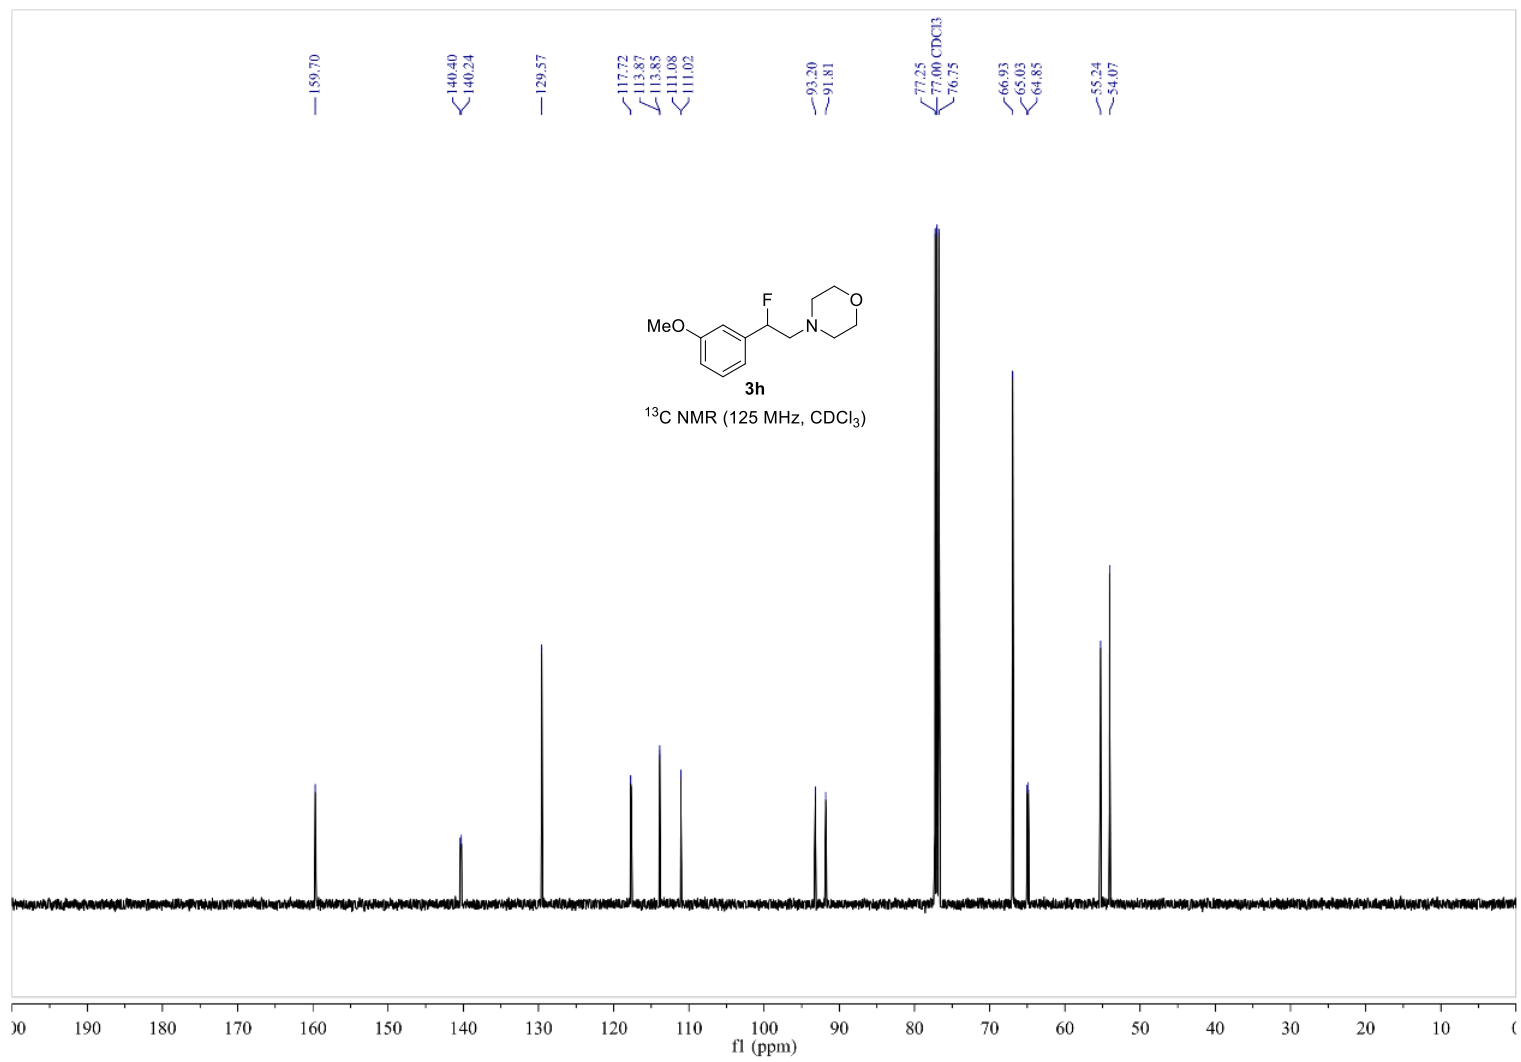

<sup>19</sup>F NMR gf-3-34aP in CDCl<sub>3</sub>

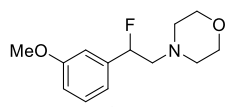

<sup>19</sup>F NMR (471 MHz, CDCl<sub>3</sub>)

---177.0786

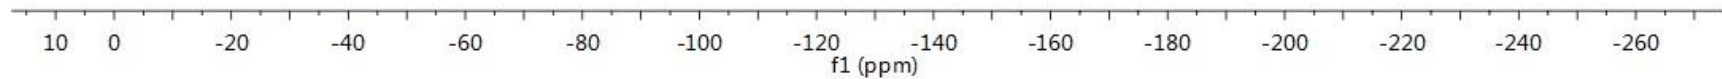

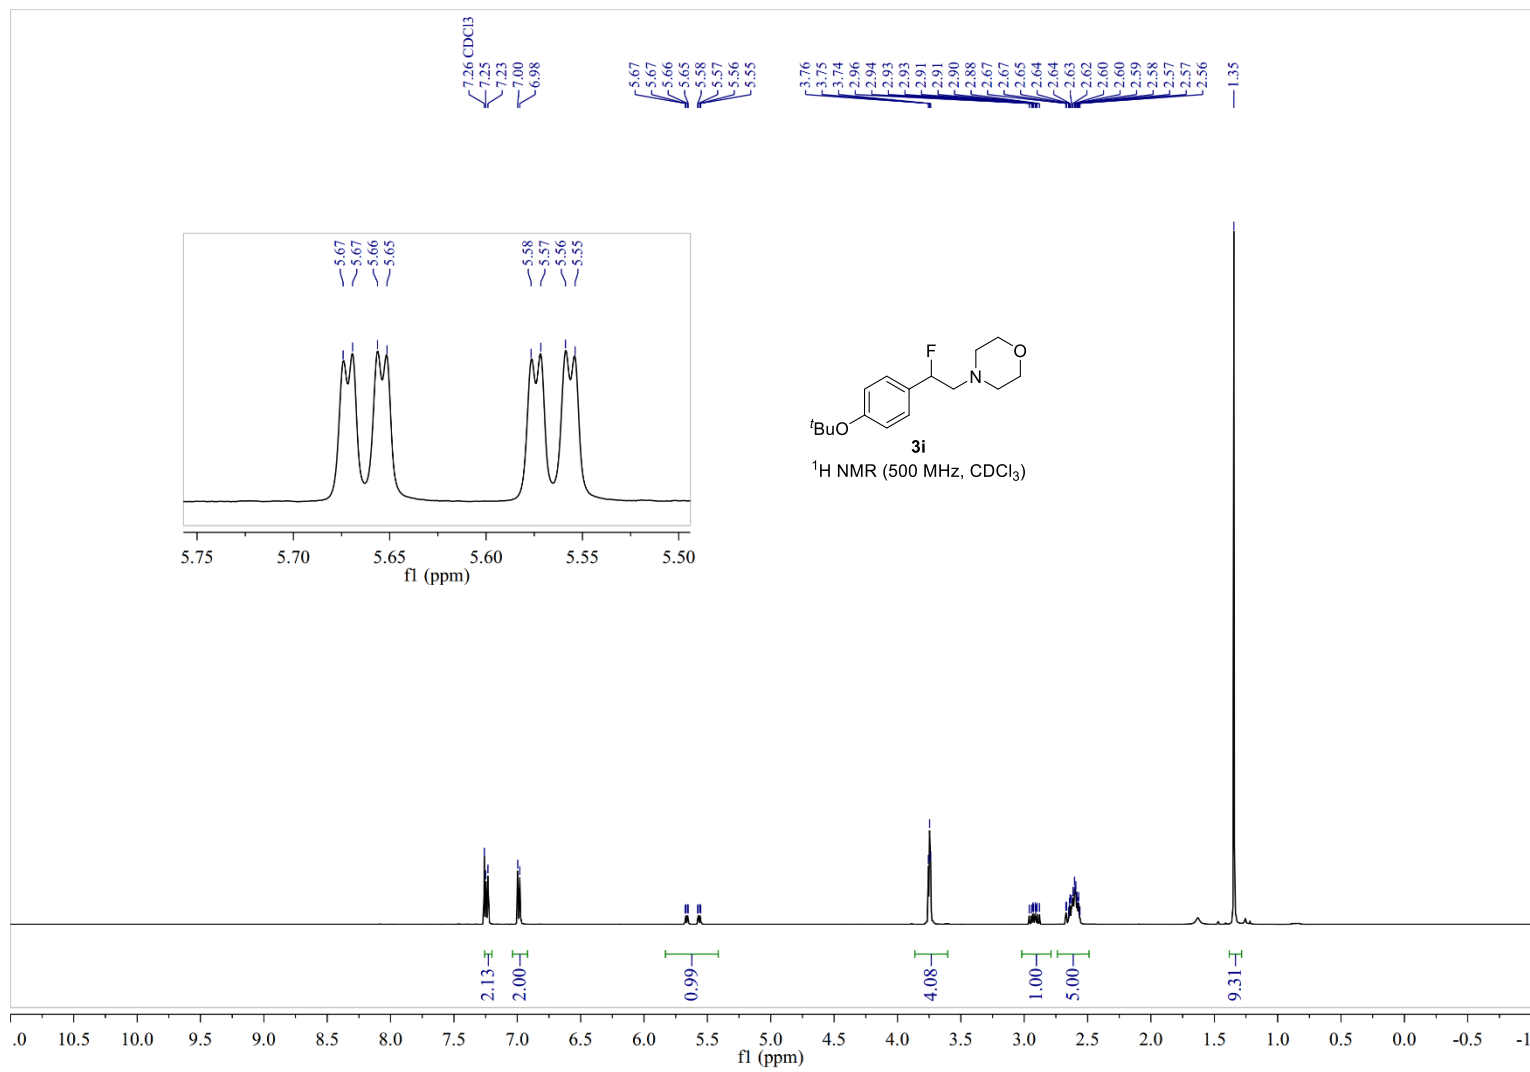

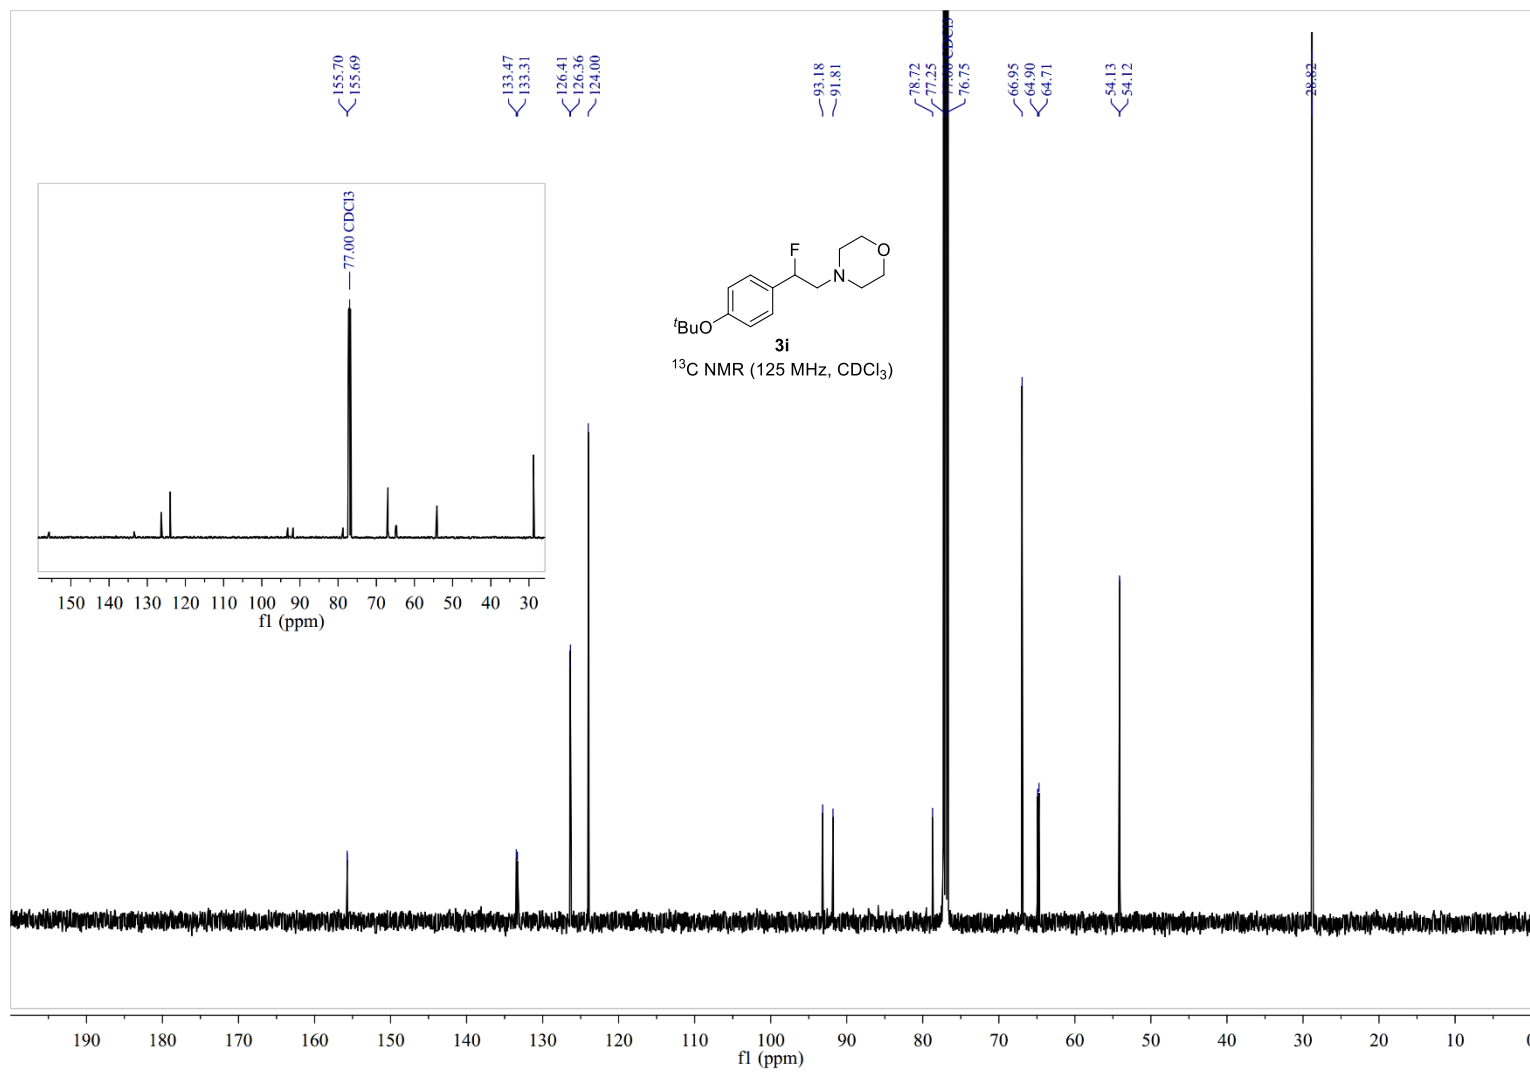

<sup>19</sup>F NMR of compound 31 in CDCl<sub>3</sub>

---173.5412

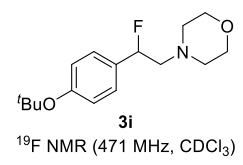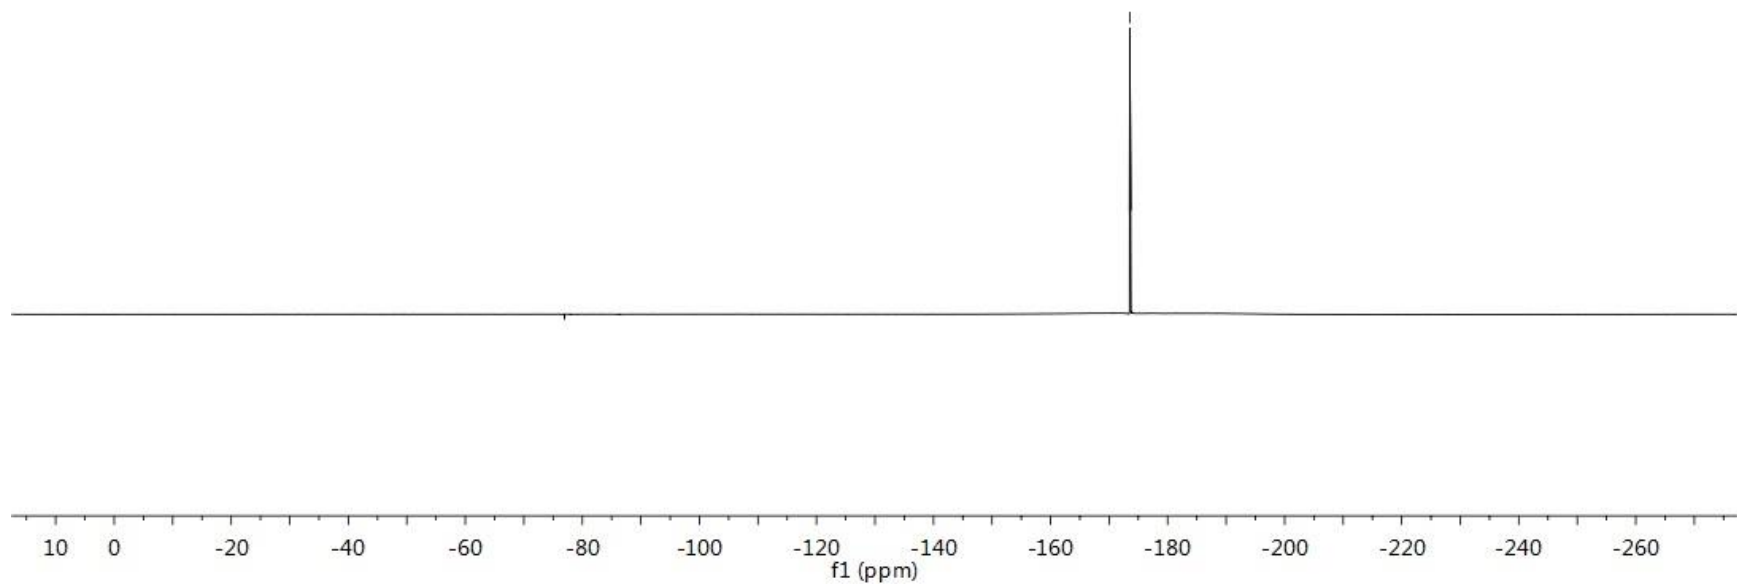

<sup>1</sup>H NMR of **3j** in CDCl<sub>3</sub>

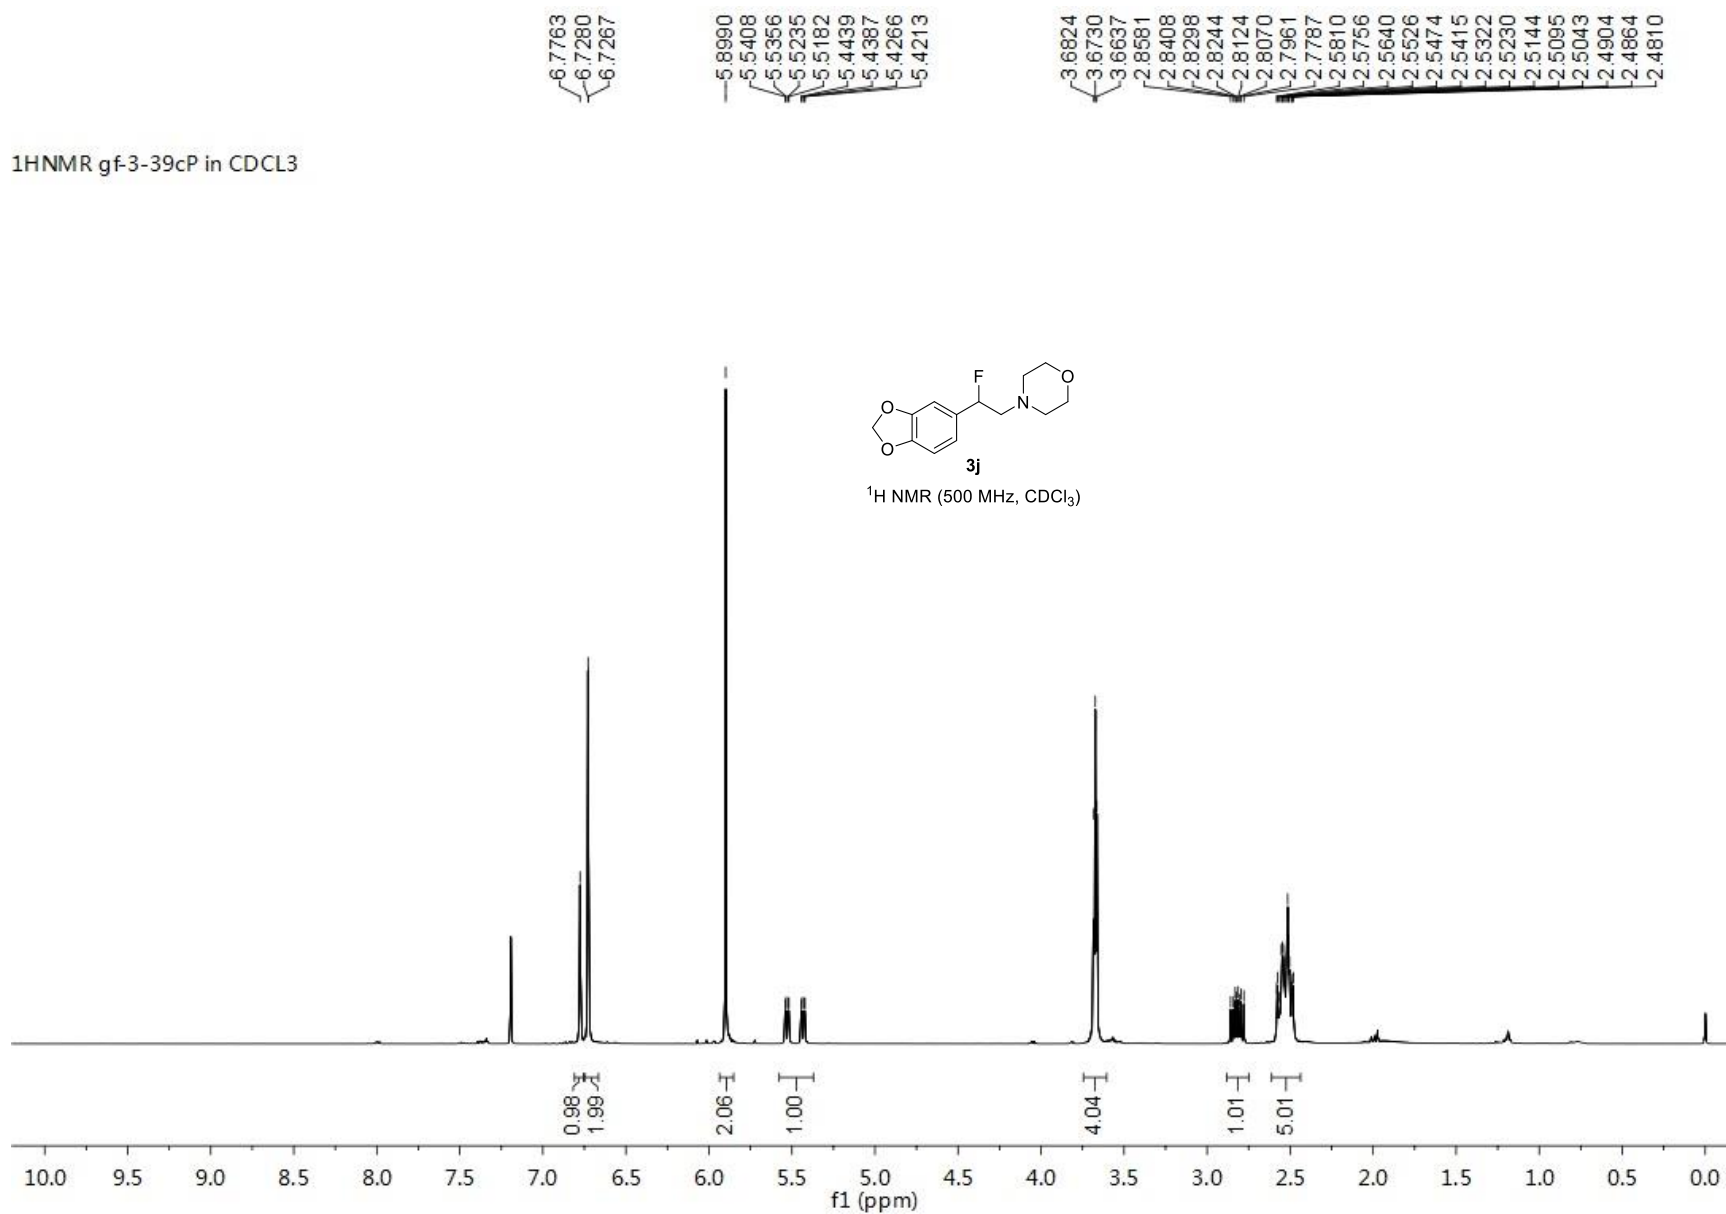

<sup>13</sup>CNMR gf-3-39cP in CDCl<sub>3</sub>

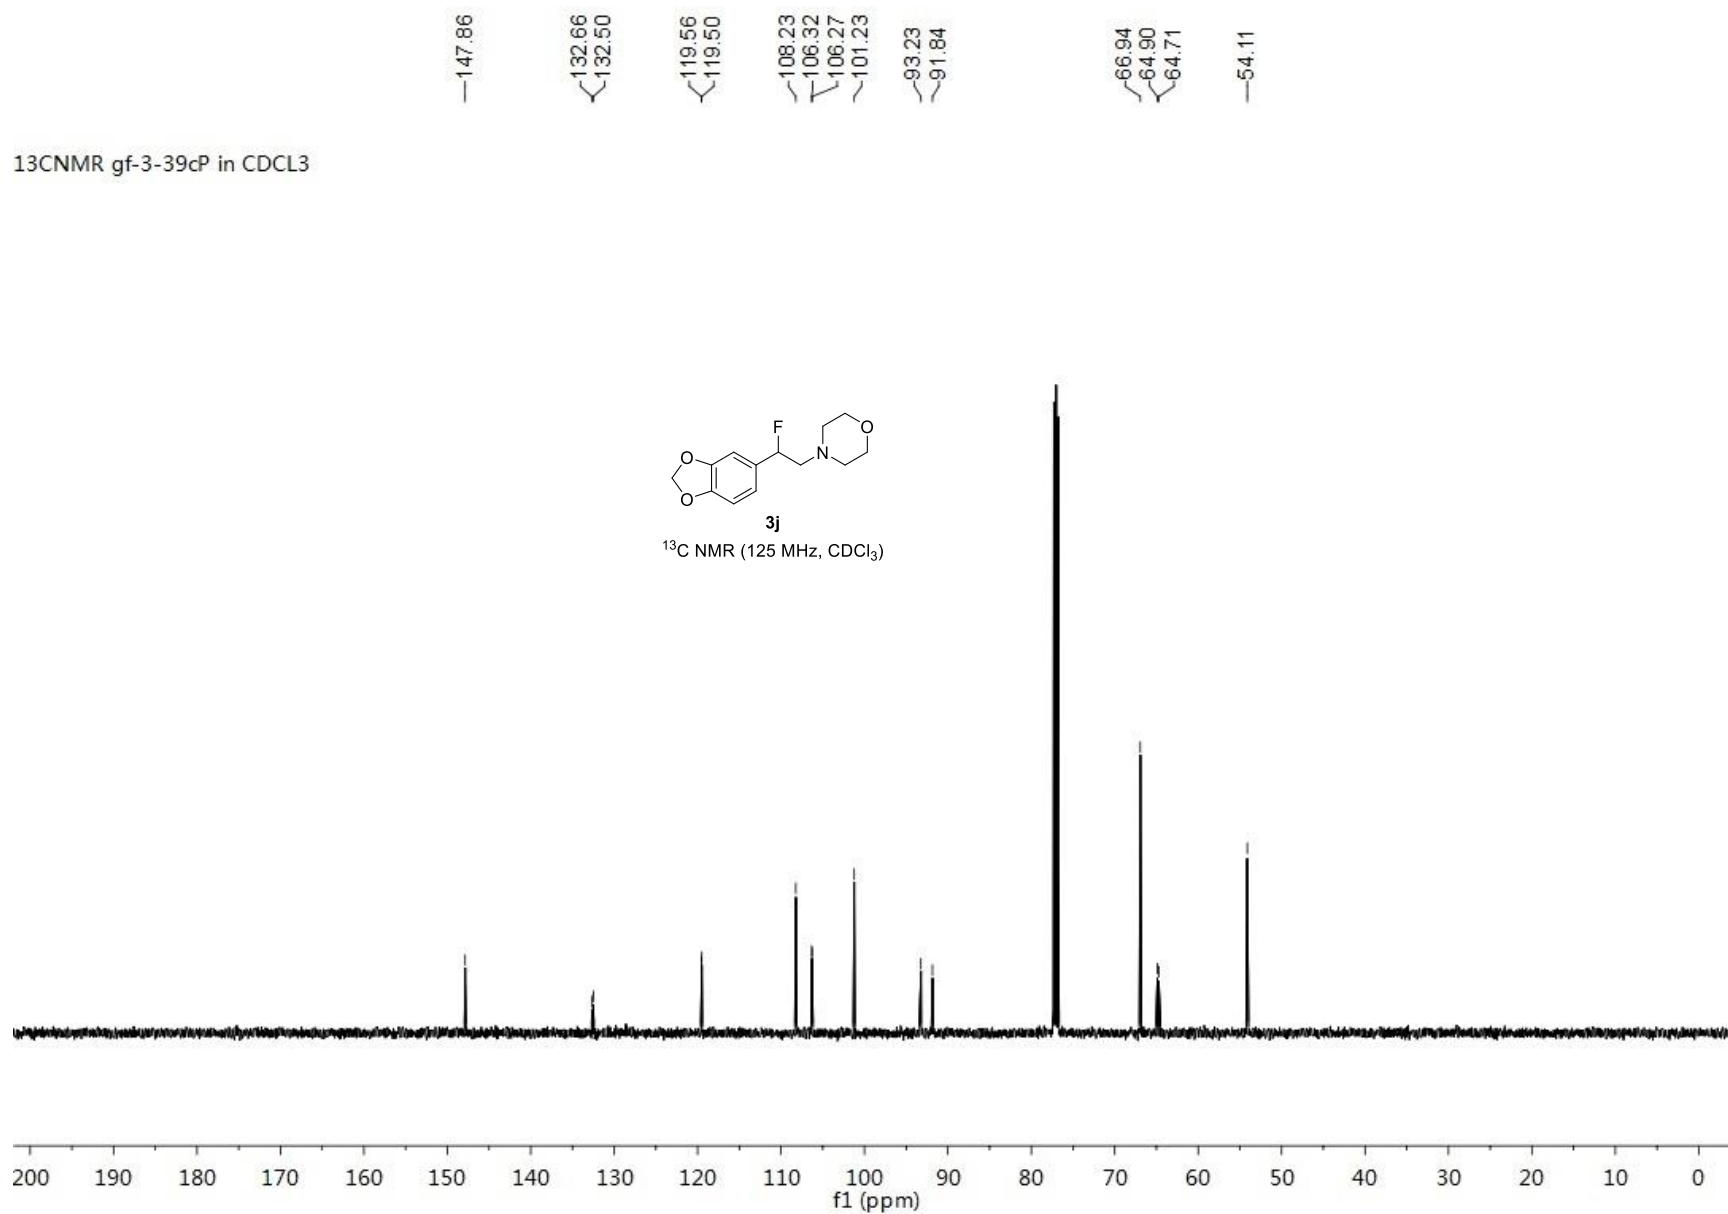





<sup>1</sup>H NMR of compound 3k in CDCl<sub>3</sub>

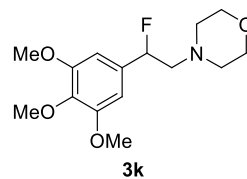

<sup>1</sup>H NMR (500 MHz, CDCl<sub>3</sub>)

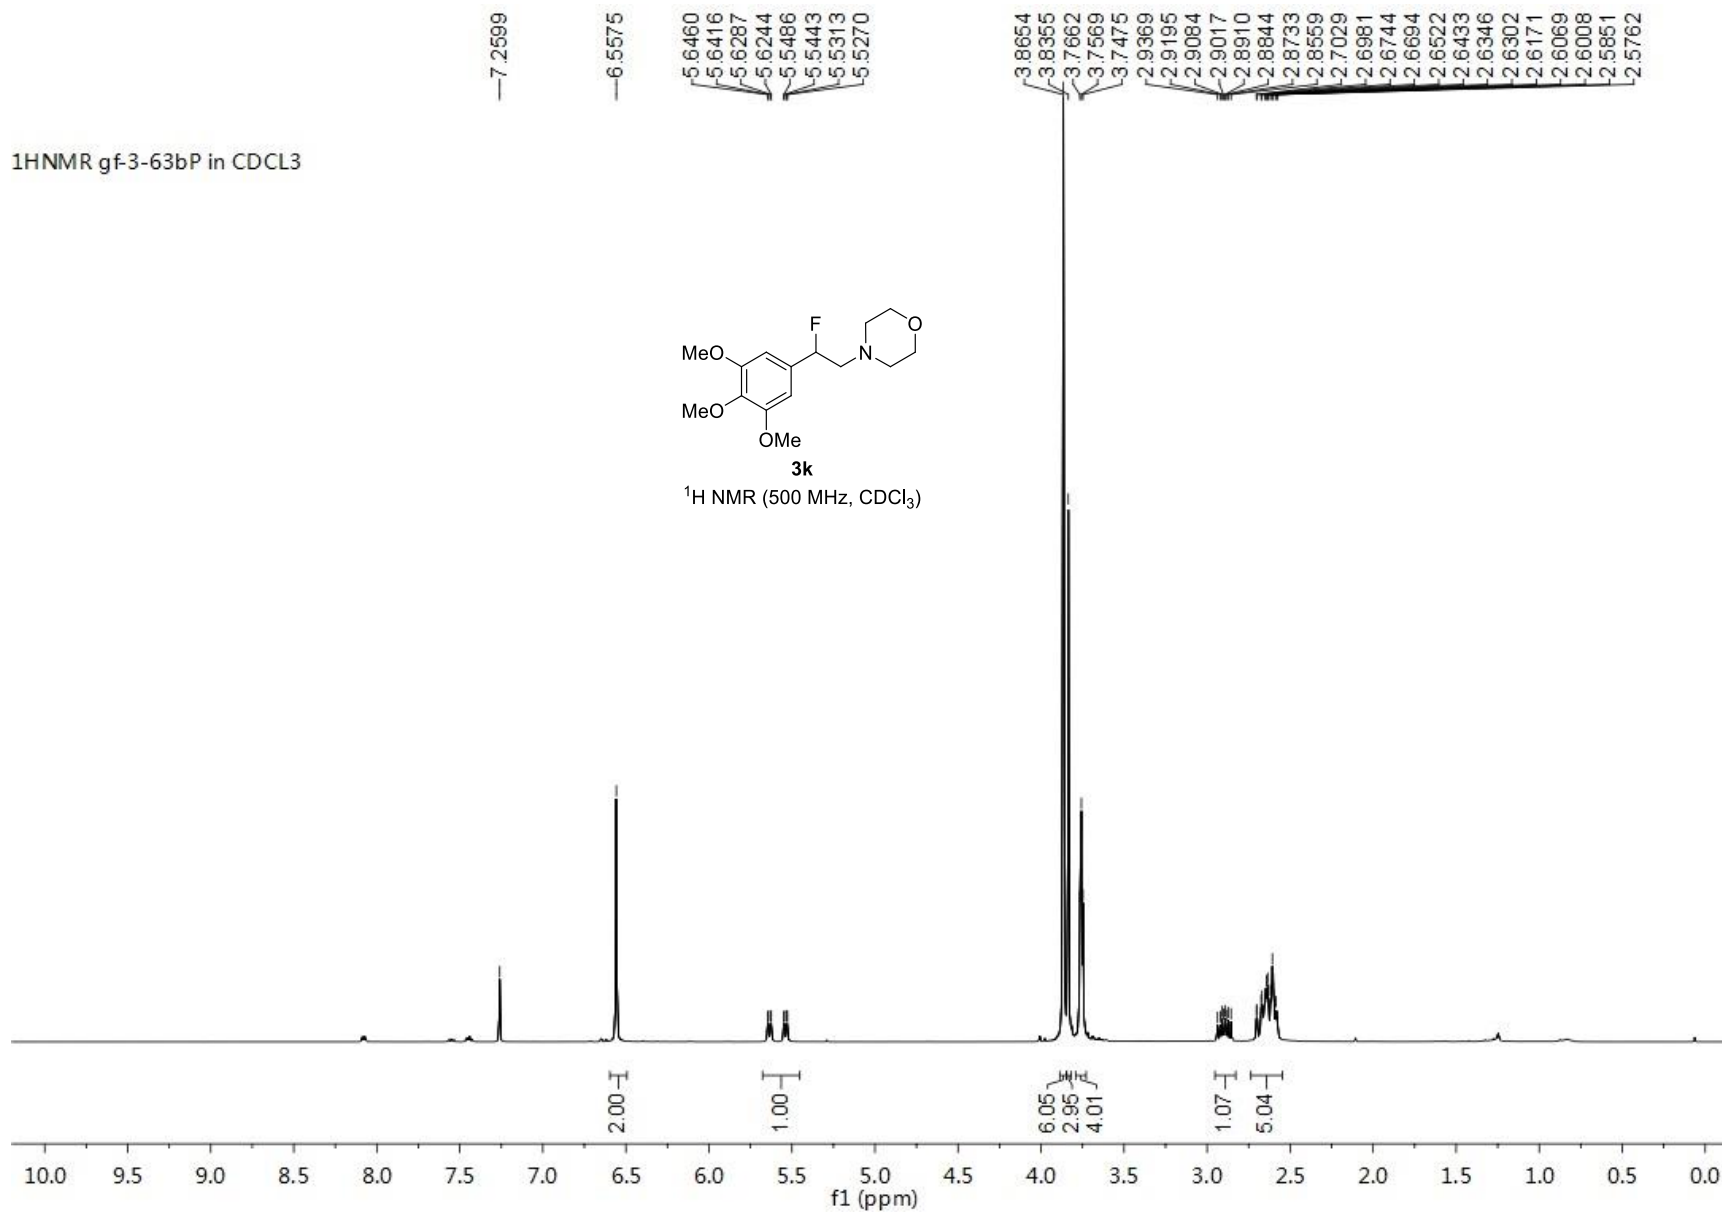

<sup>13</sup>CNMR gf-3-63bP in CDCl<sub>3</sub>

153.39  
138.00  
134.43  
134.27  
102.61  
102.56  
93.55  
92.17  
66.93  
65.03  
64.85  
60.86  
56.17  
54.09

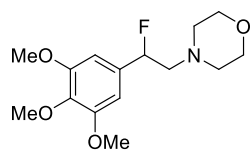

<sup>13</sup>C NMR (125 MHz, CDCl<sub>3</sub>)

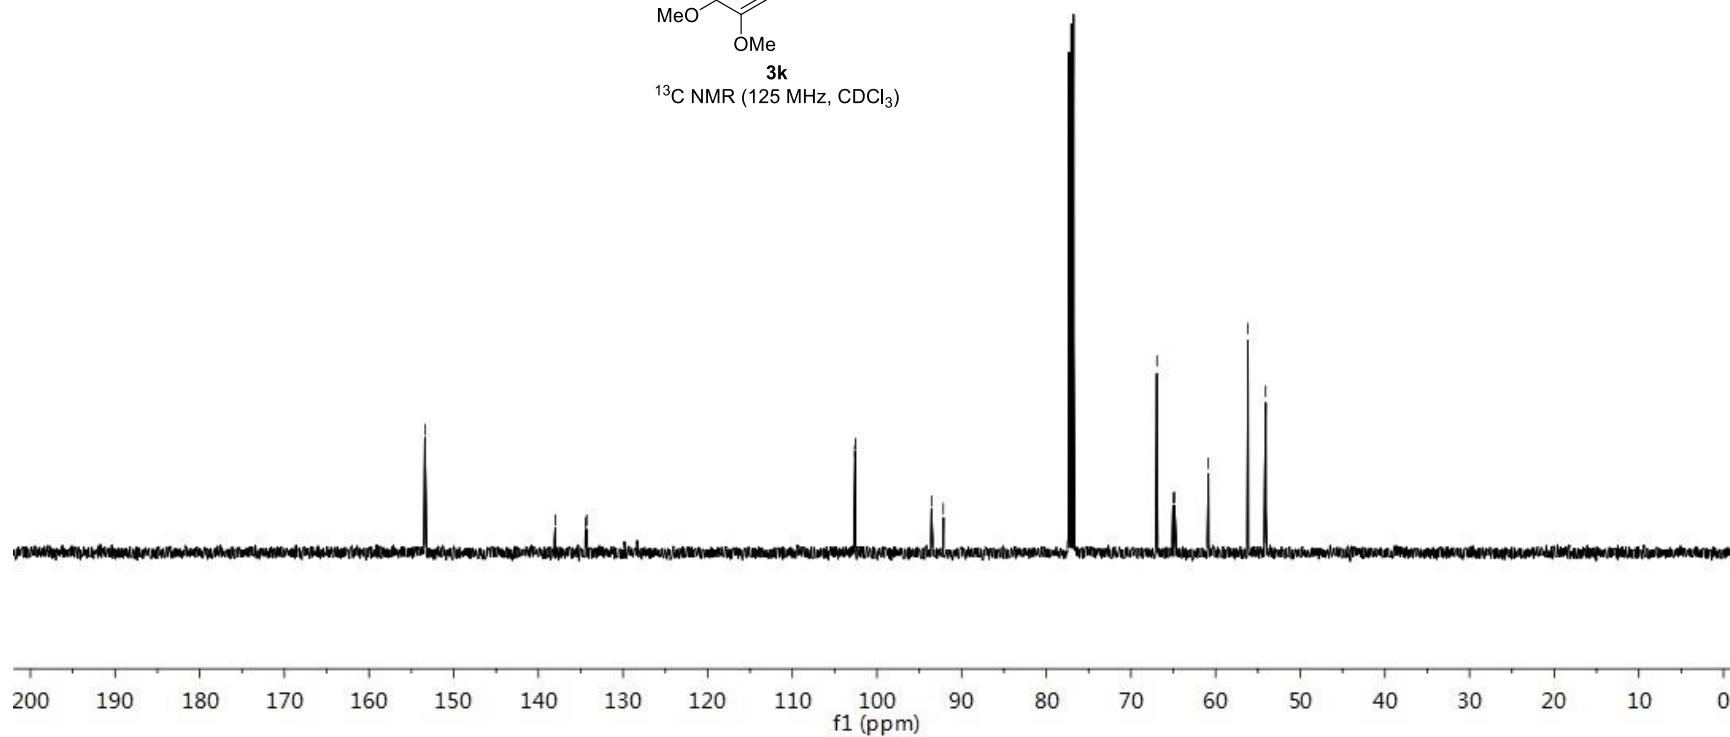

<sup>19</sup>F NMR gf-3-63bP in CDCl<sub>3</sub>

— -174.4209

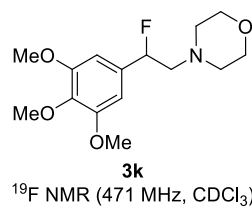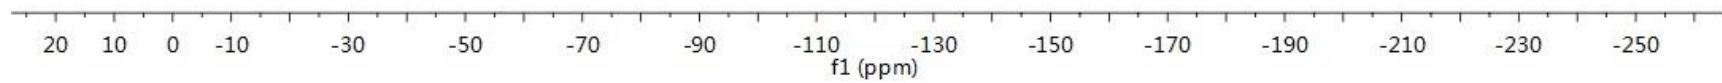

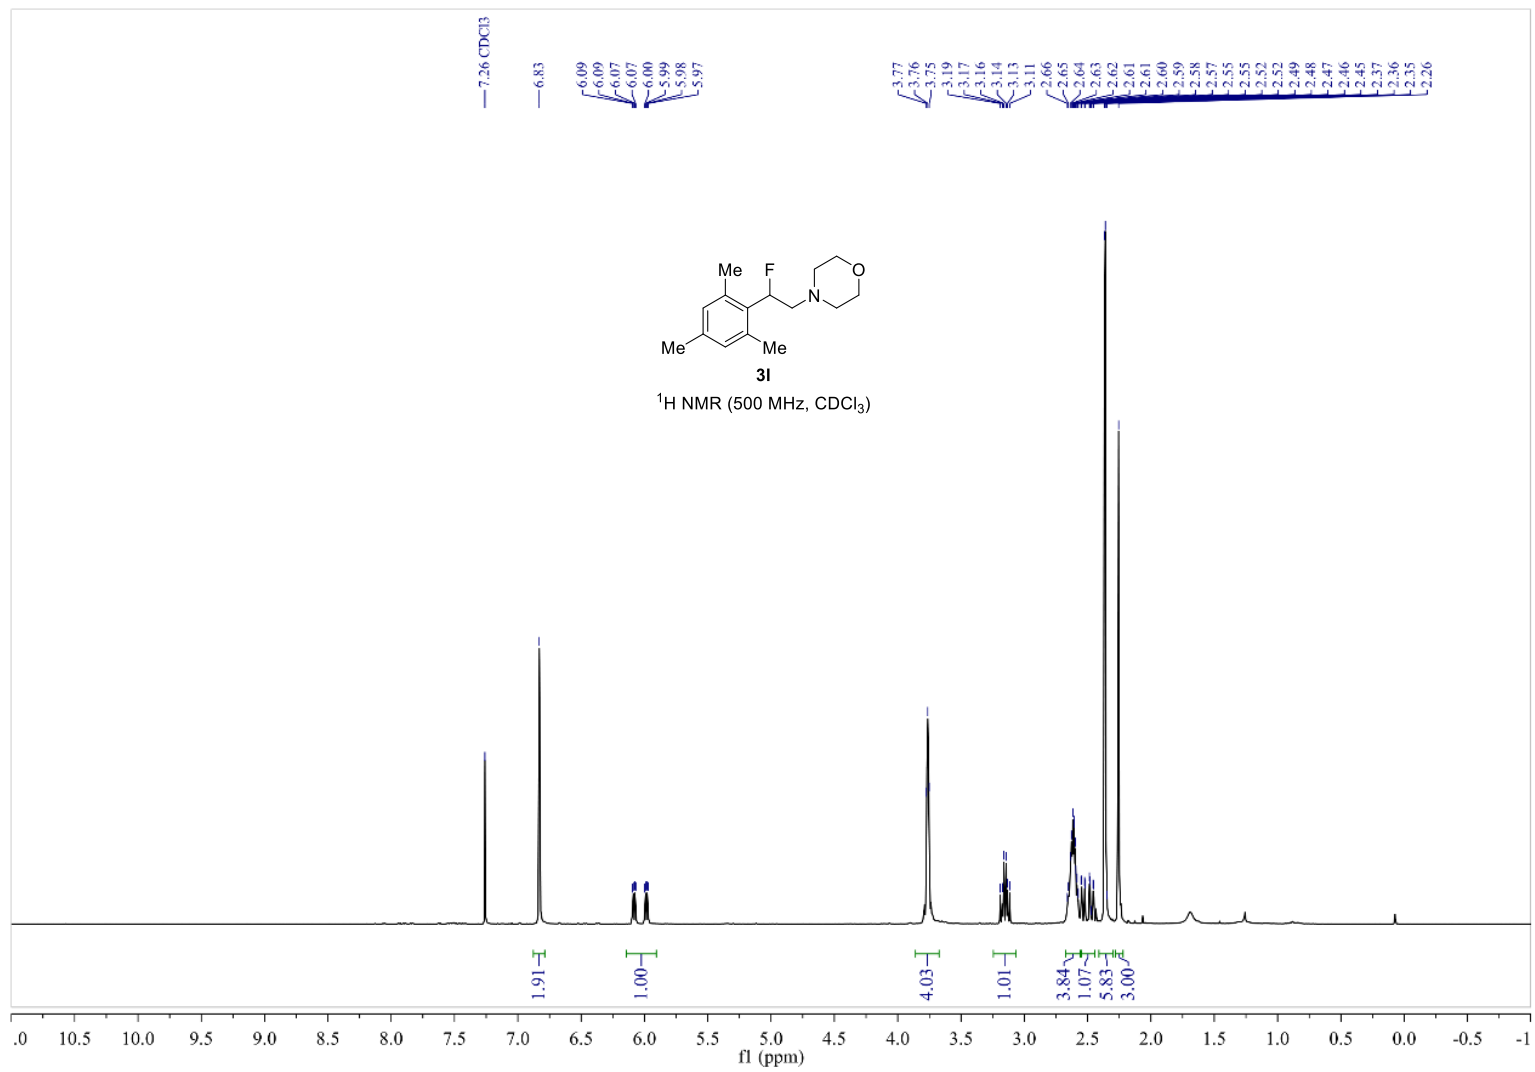

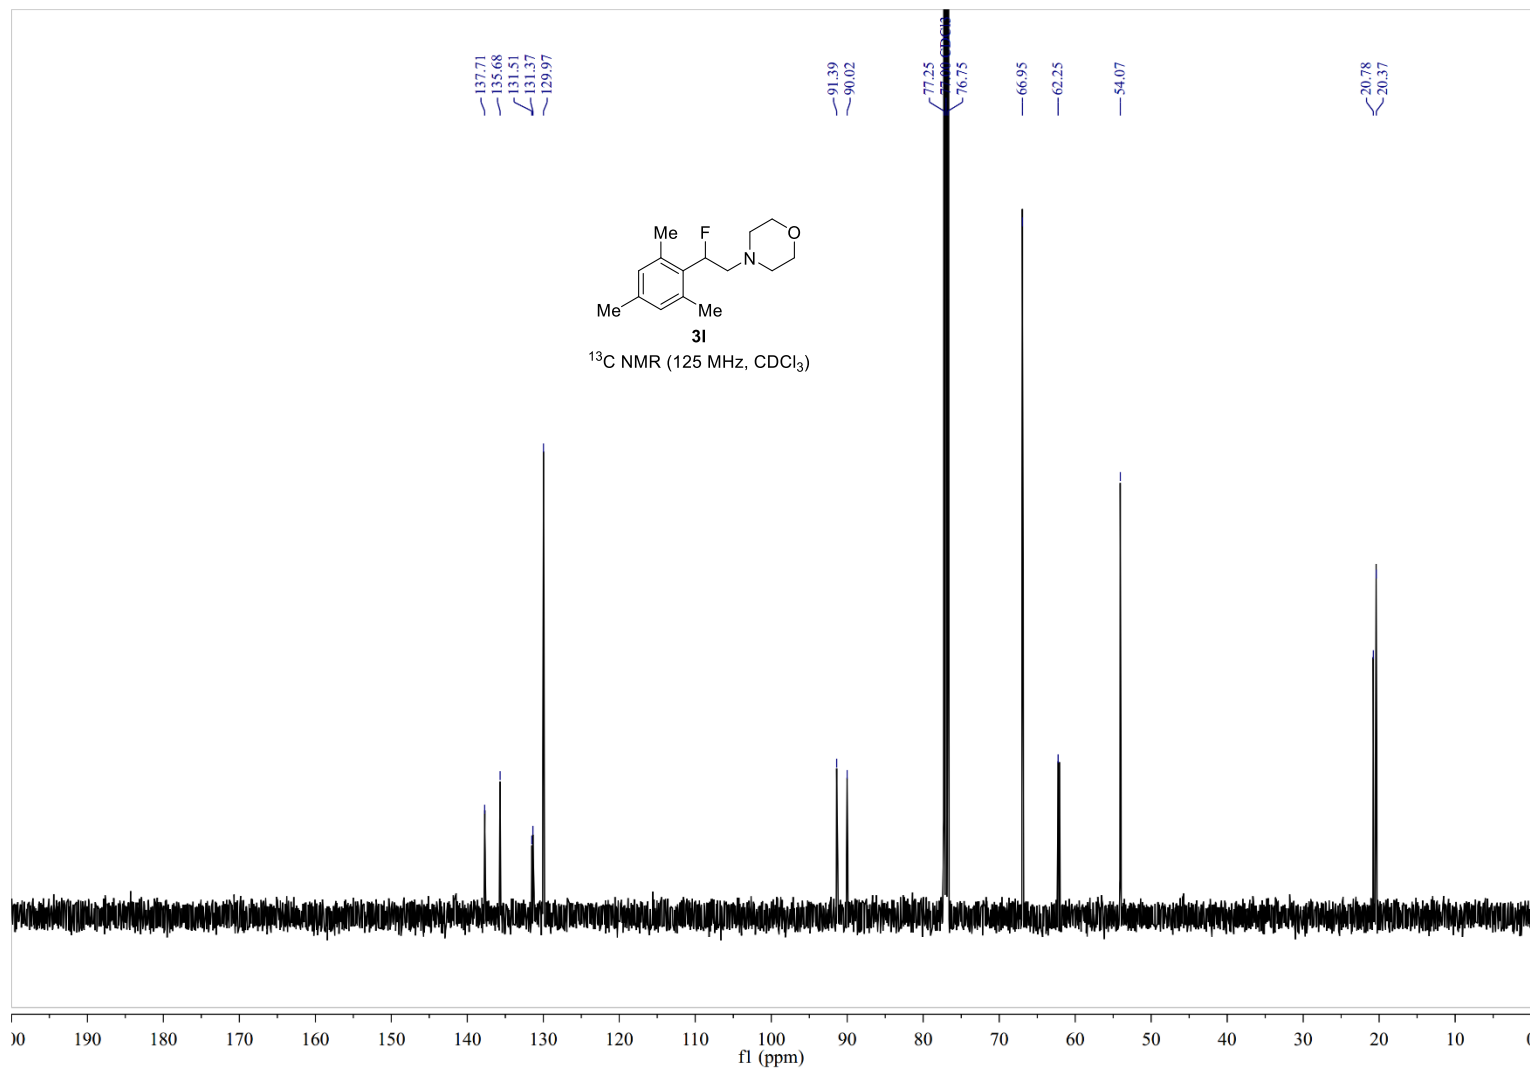

<sup>19</sup>F NMR gf-3-41aP in CDCl<sub>3</sub>

— -181.5748

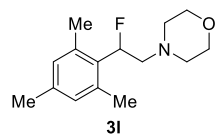

<sup>19</sup>F NMR (471 MHz, CDCl<sub>3</sub>)

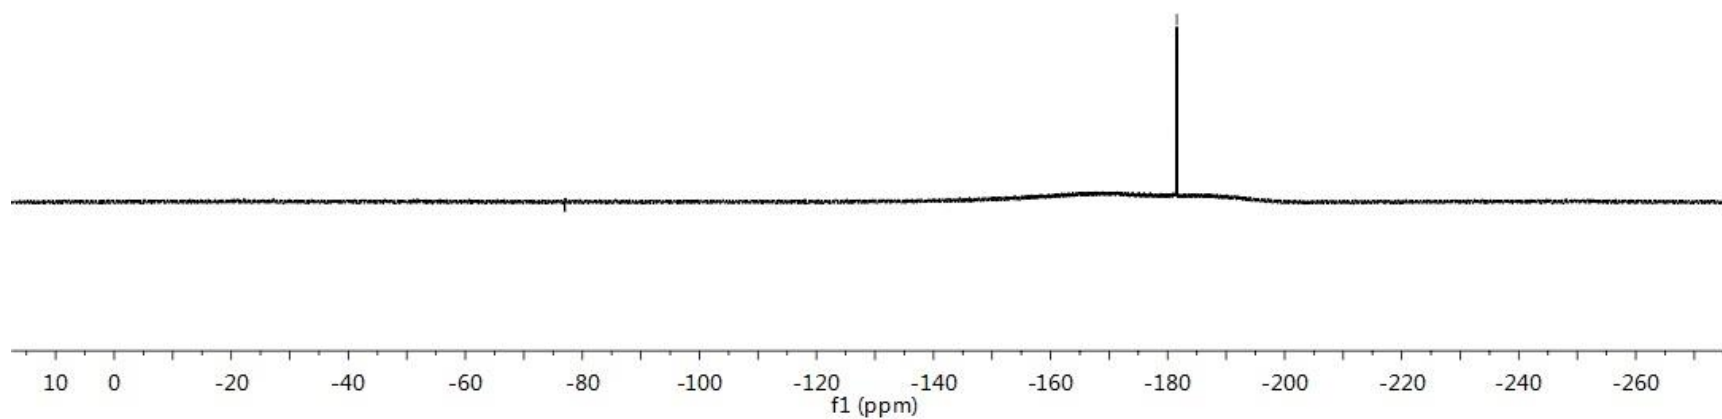

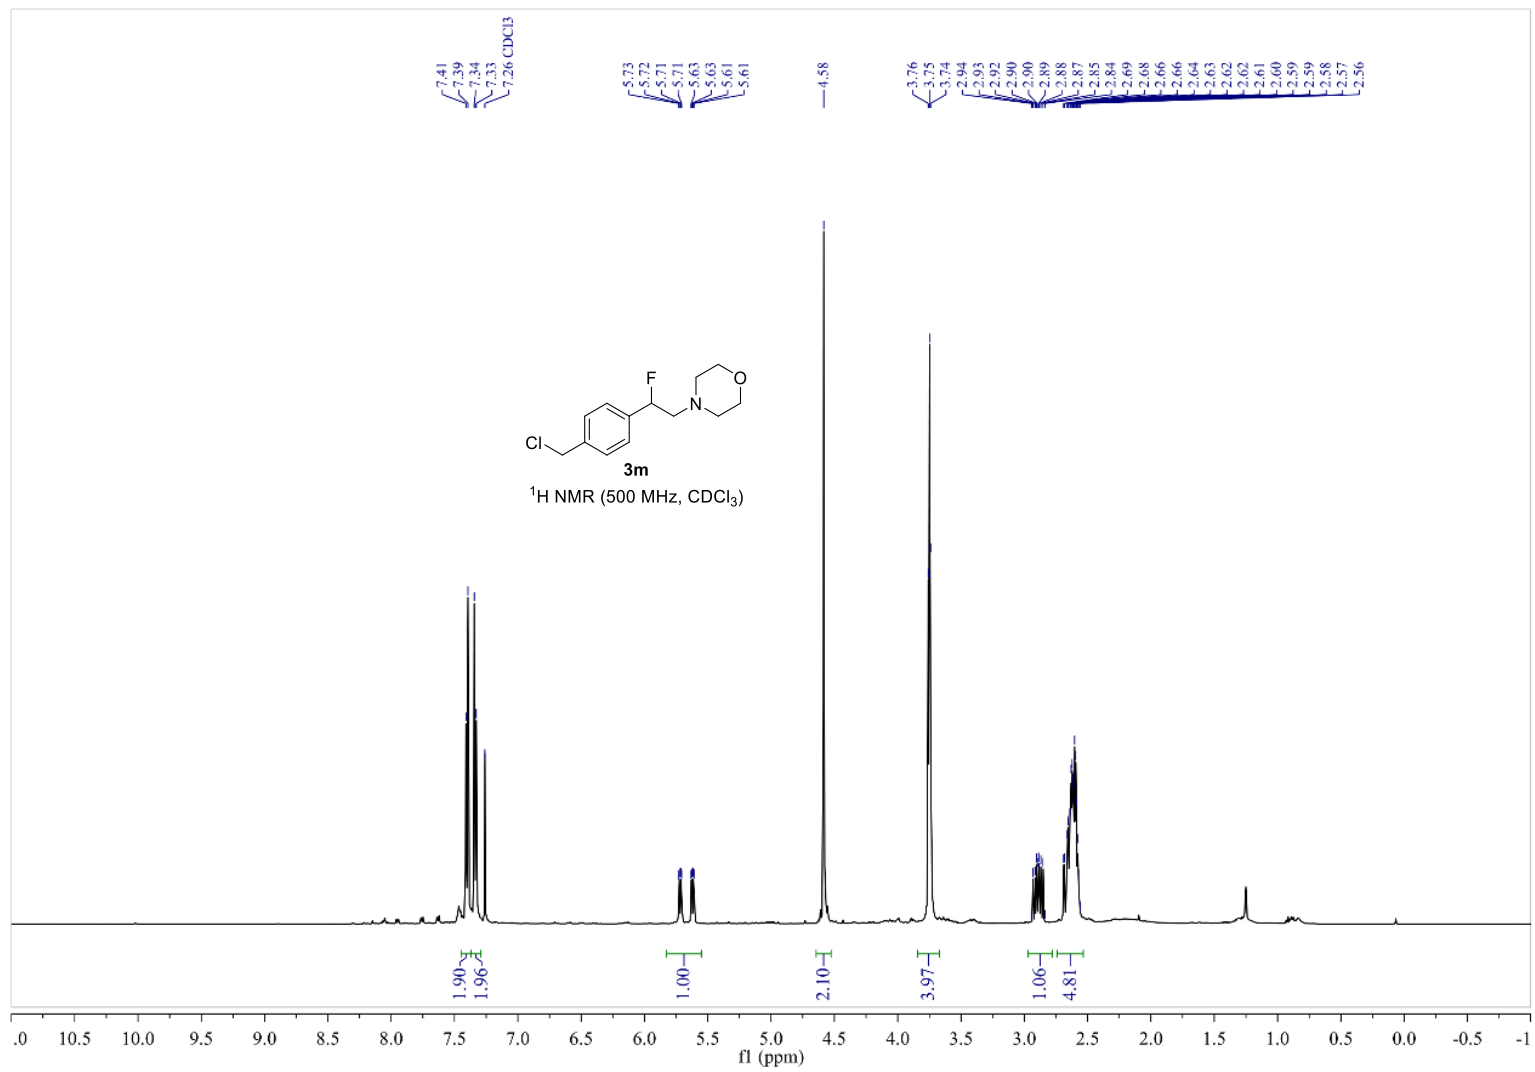



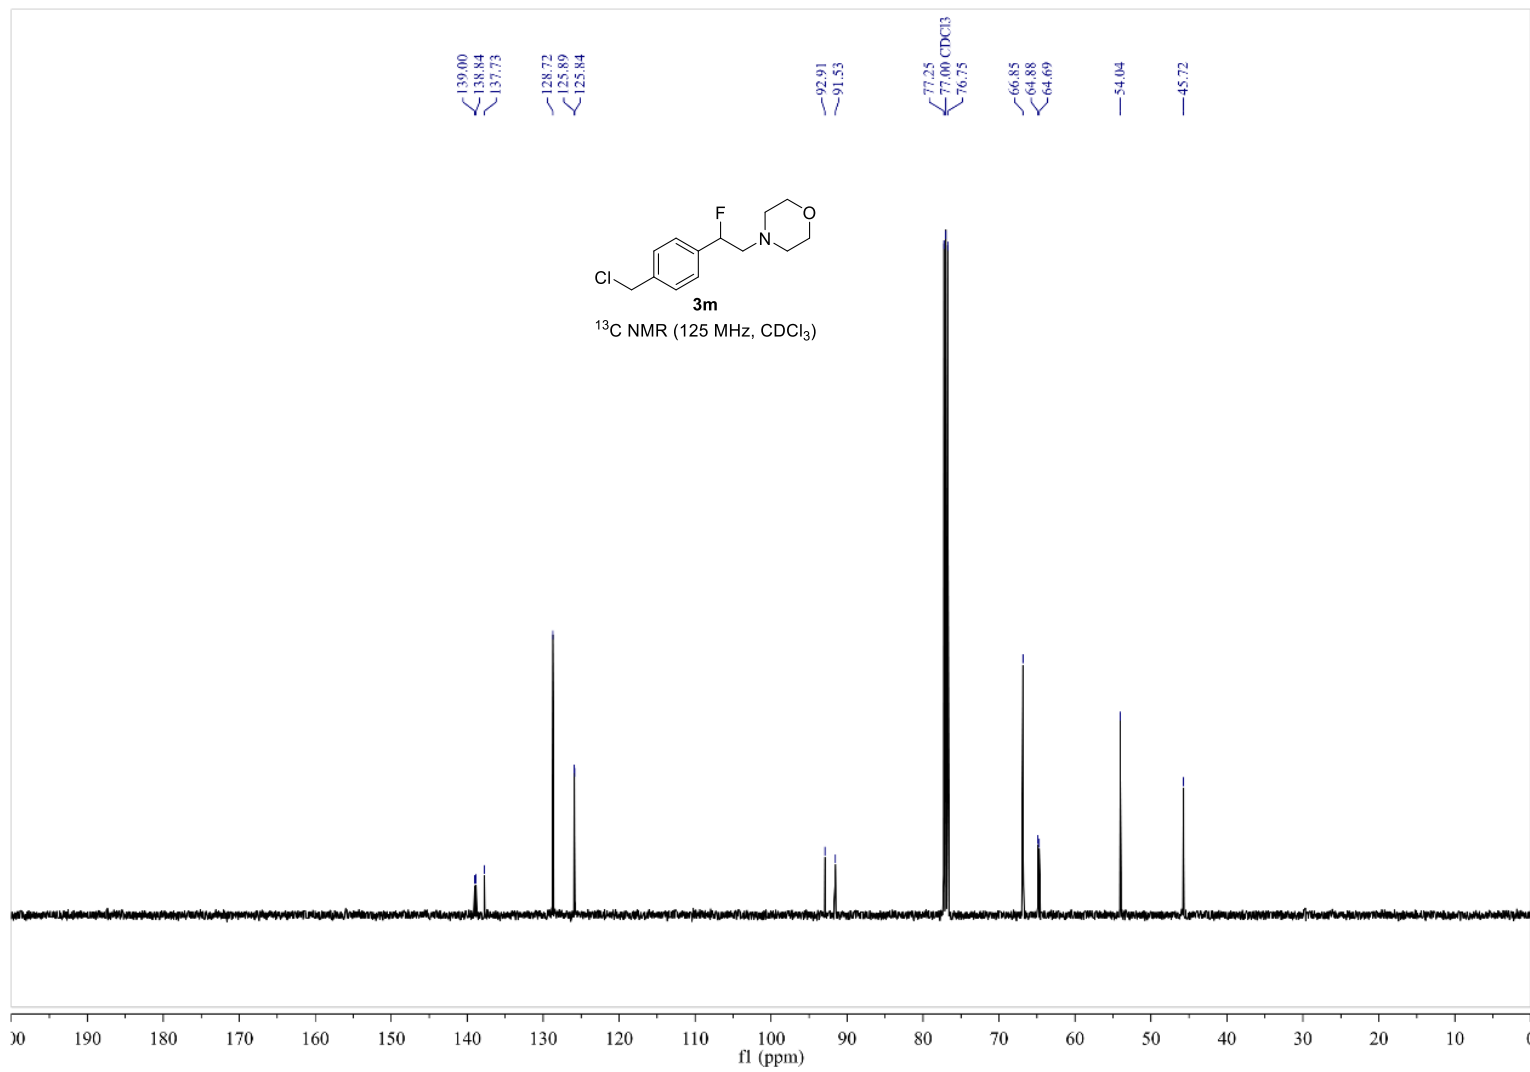

<sup>19</sup>F NMR gf-3-45aP in CDCl<sub>3</sub>

---177.6391

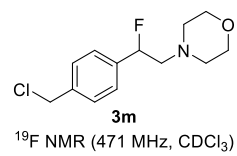

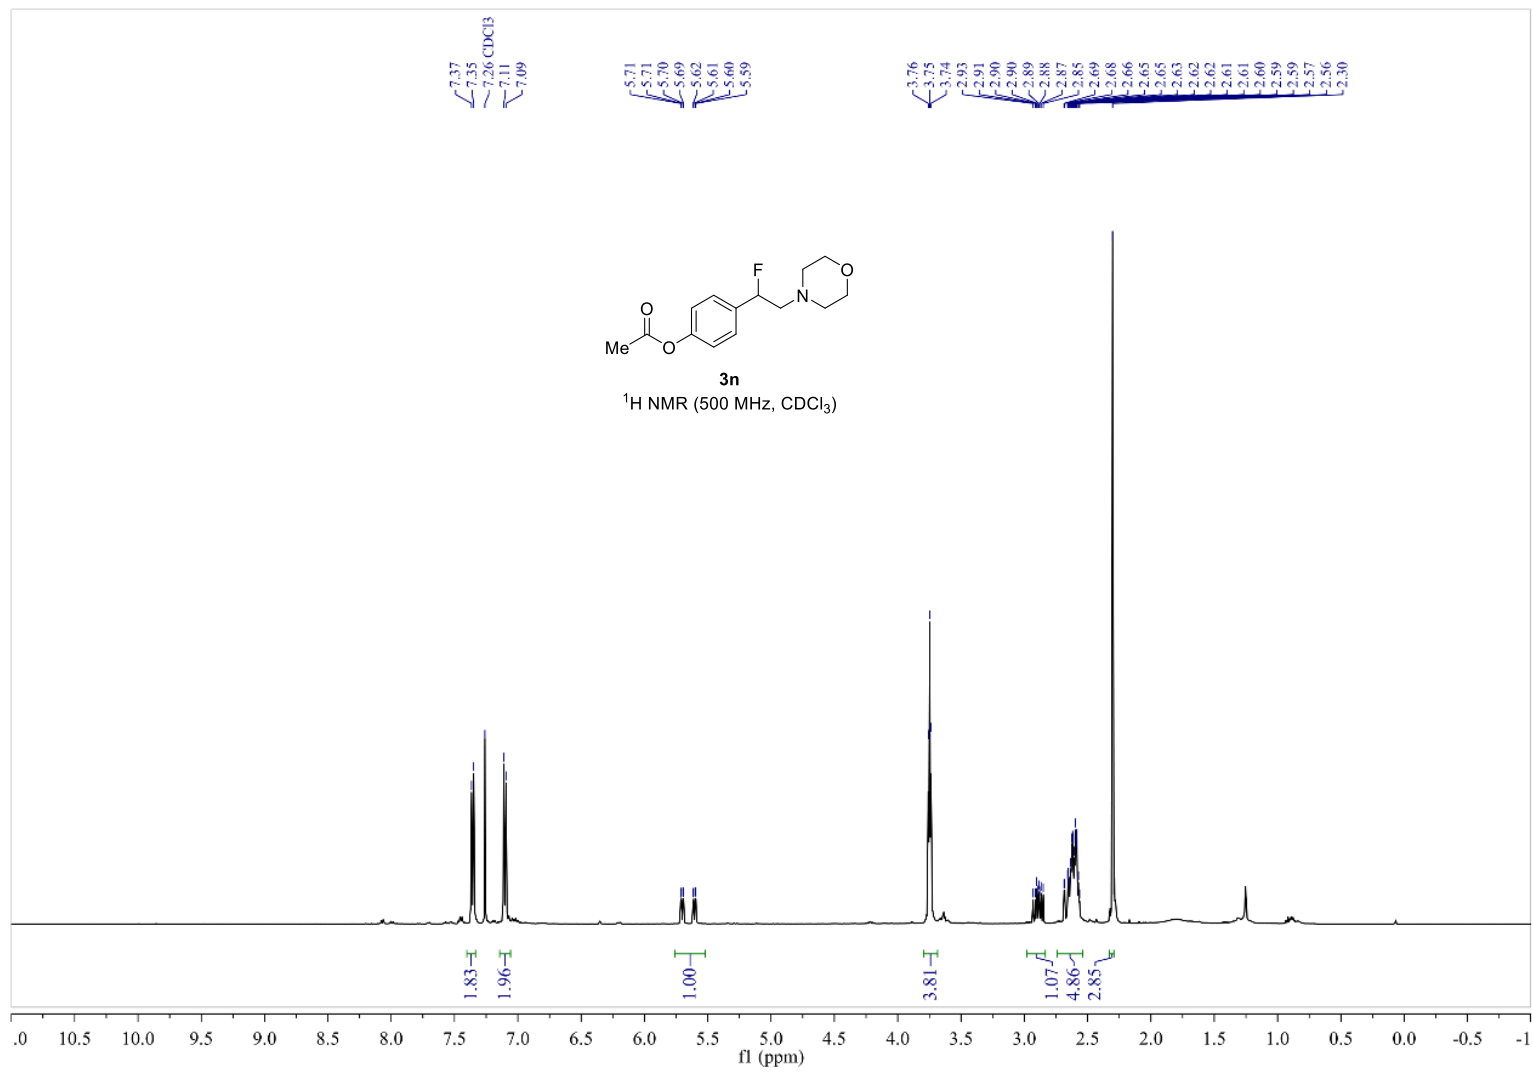

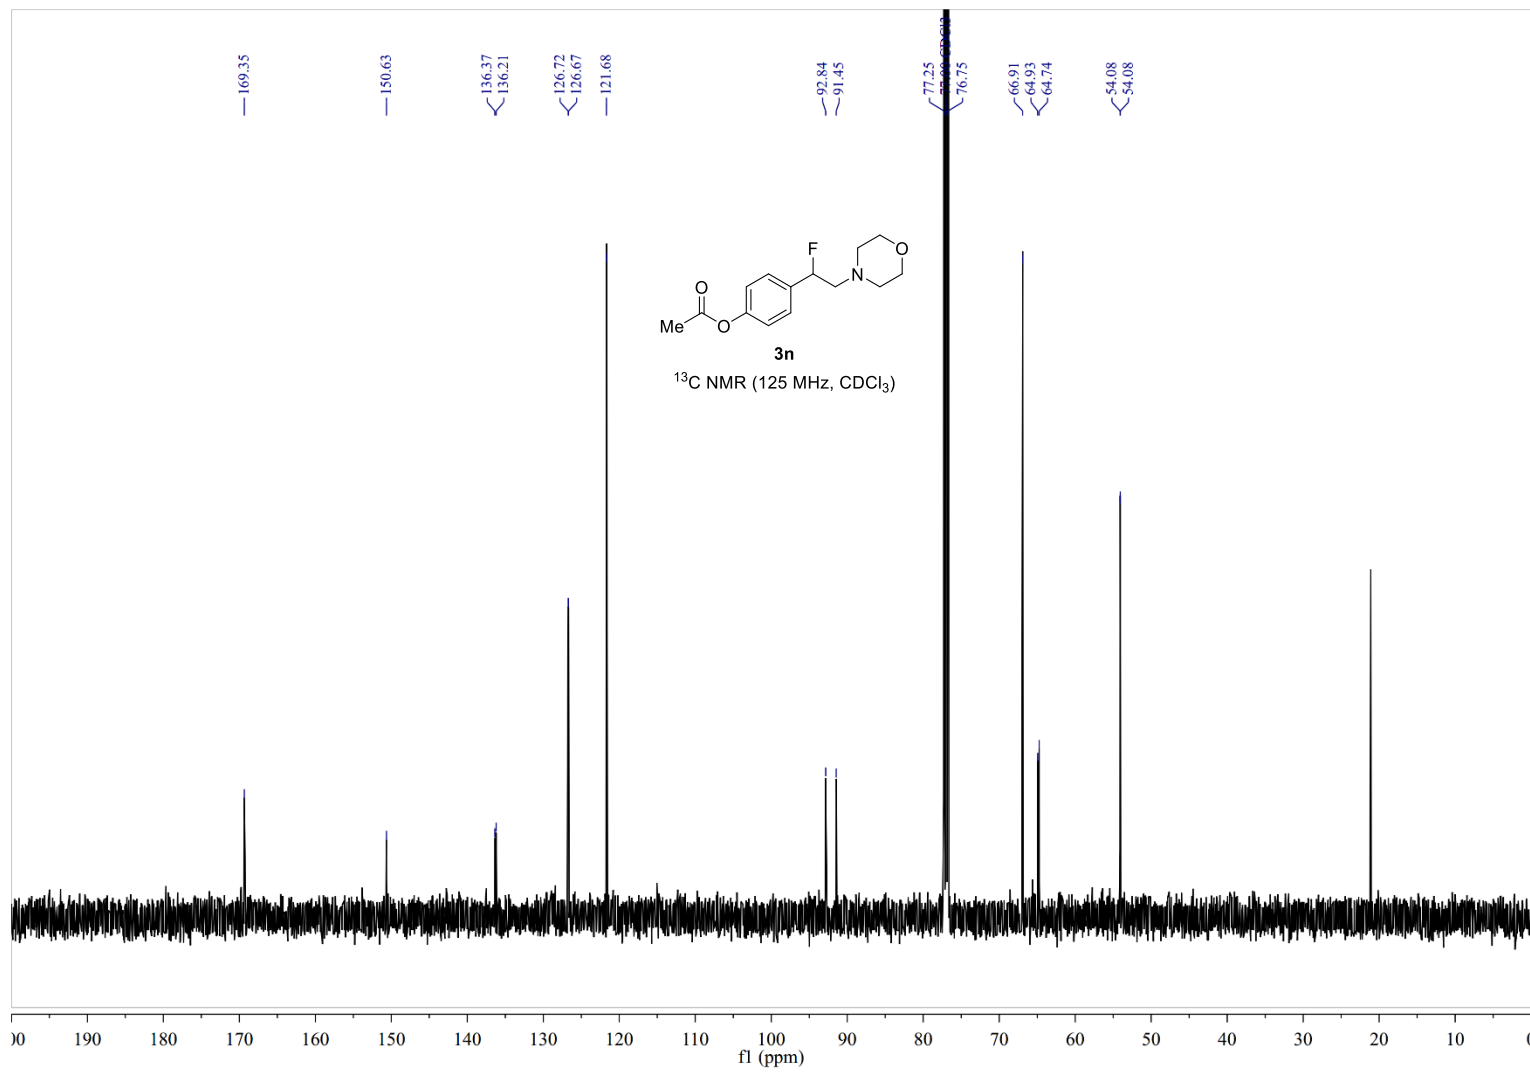

$^{19}\text{F}$ NMR gf-3-38bP in  $\text{CDCl}_3$

—176.2978

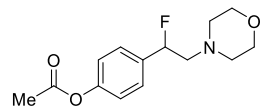

**3n**  
 $^{19}\text{F}$  NMR (471 MHz,  $\text{CDCl}_3$ )

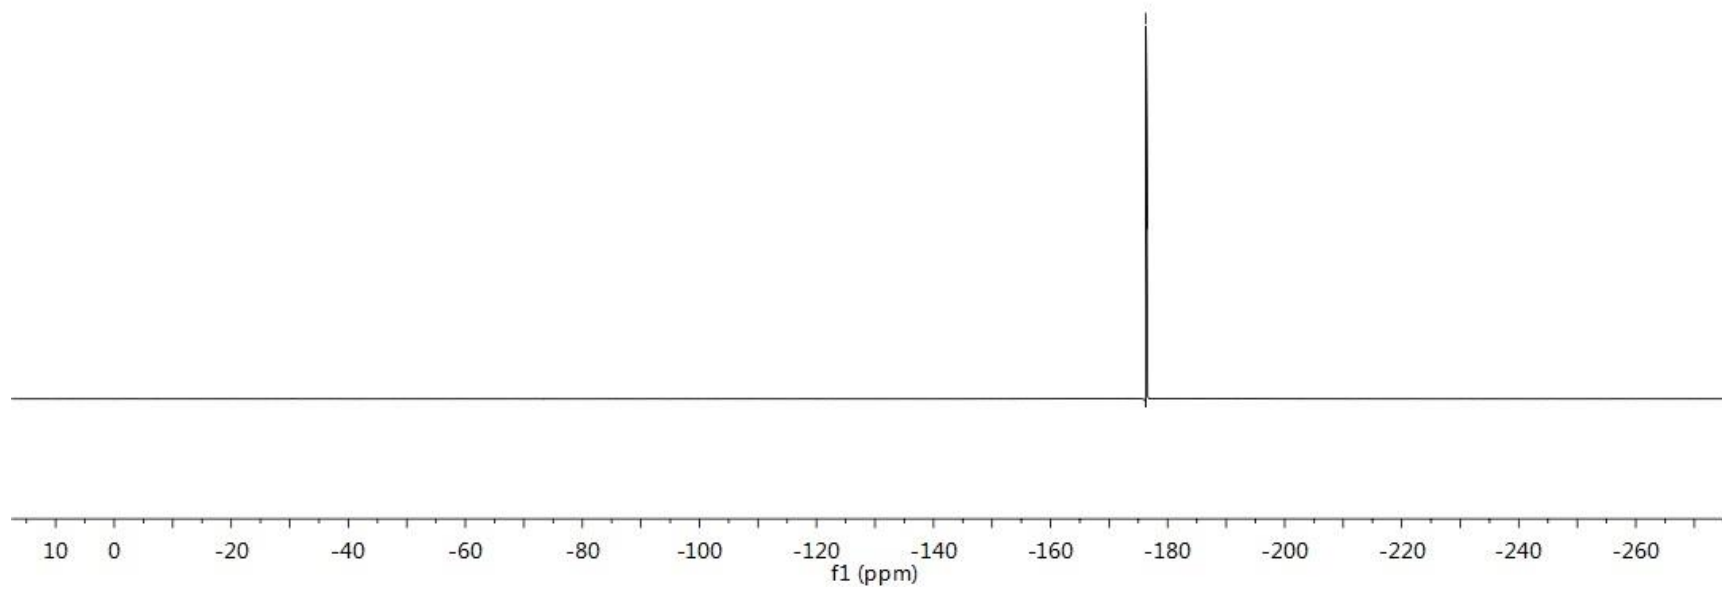

7.8232  
 7.8077  
 7.3442  
 7.3285  
 5.7340  
 5.7296  
 5.7168  
 5.7125  
 5.6361  
 5.6317  
 5.6189  
 5.6147  
 3.7537  
 3.7444  
 3.7351  
 2.9044  
 2.8975  
 2.8871  
 2.8690  
 2.6933  
 2.6883  
 2.6647  
 2.6596  
 2.6479  
 2.6254  
 2.6108  
 2.6006  
 2.5919  
 1.3418  
 1.3418

<sup>1</sup>H NMR of gf-3-66aPP in CDCl<sub>3</sub>

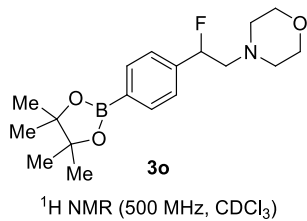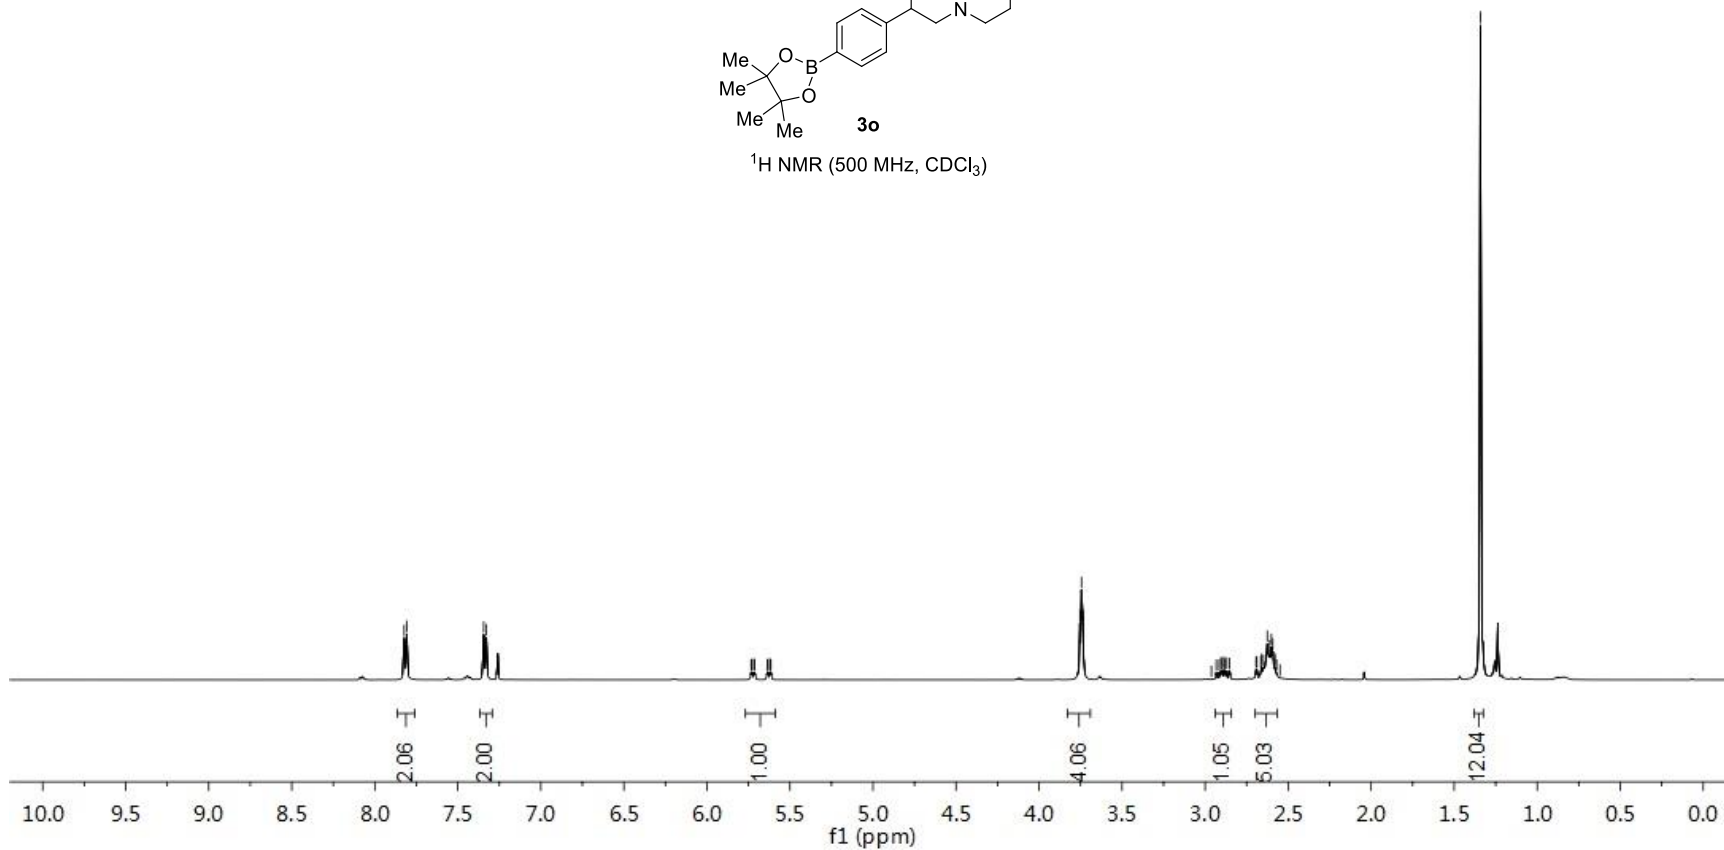

141.73  
141.57  
134.91  
128.36  
128.27  
124.69  
124.63

93.21  
91.82  
83.89

66.88  
64.92  
64.74  
54.03

24.84

<sup>13</sup>CNMR gf-3-66aPP in CDCl<sub>3</sub>

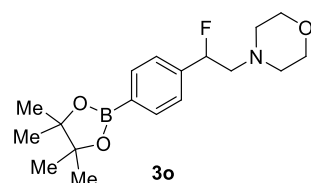

<sup>13</sup>C NMR (125 MHz, CDCl<sub>3</sub>)

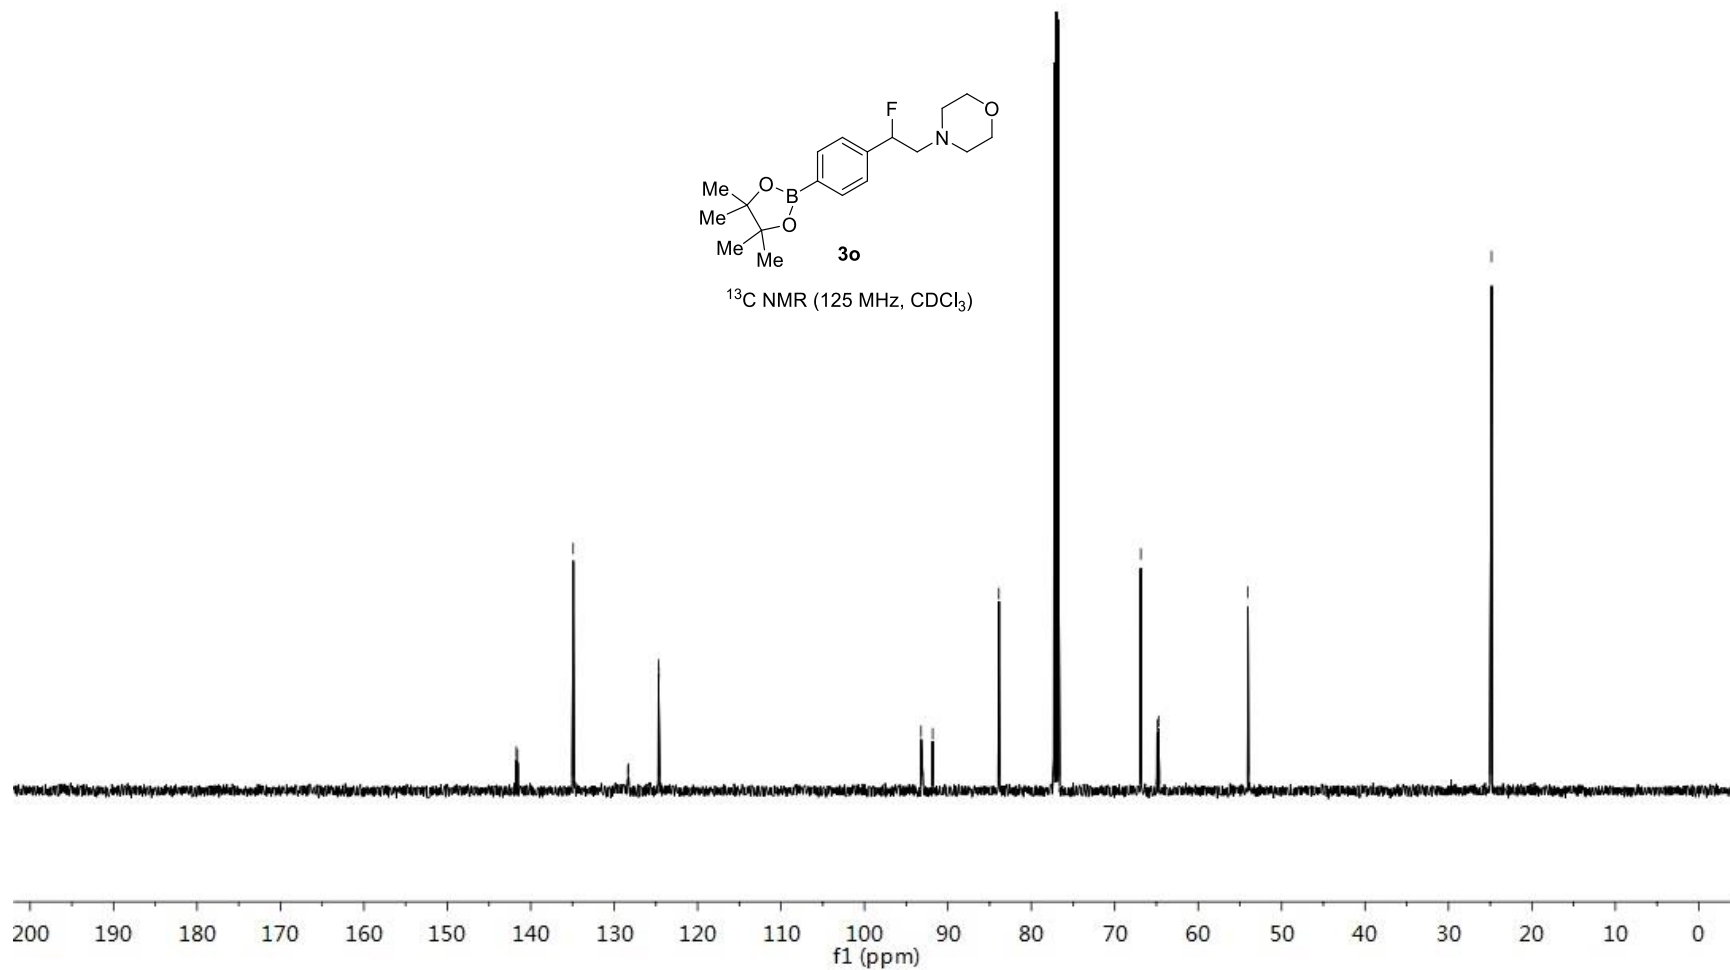

<sup>19</sup>F NMR gf-3-66aPP in CDCl<sub>3</sub>

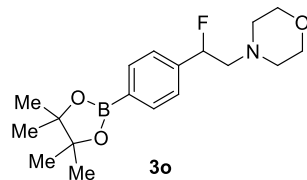

<sup>19</sup>F NMR (471 MHz, CDCl<sub>3</sub>)

---178.8272

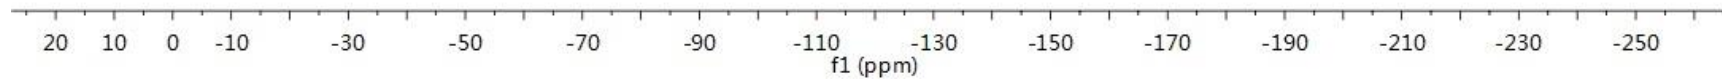





<sup>13</sup>CNMR gf-3-58cP in CDCl<sub>3</sub>

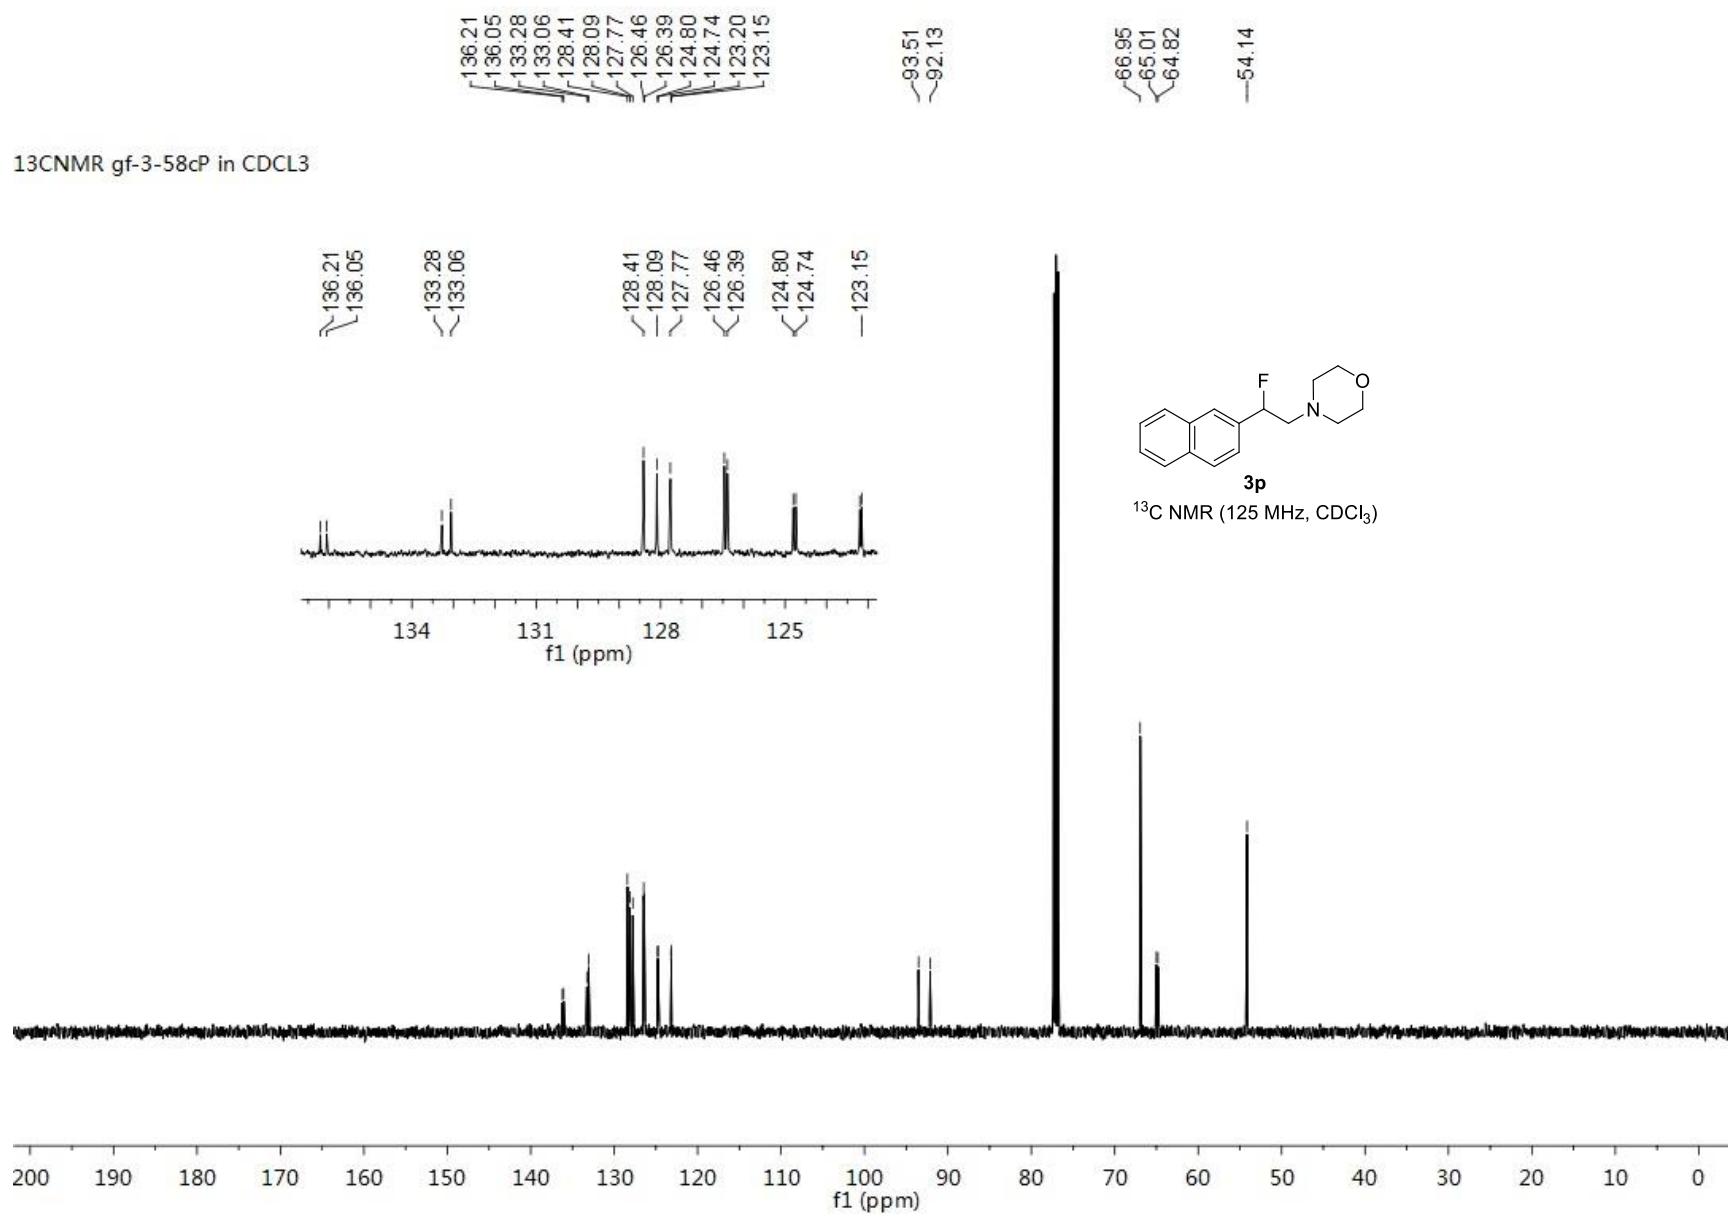

<sup>19</sup>F NMR gf-3-58cP in CDCl<sub>3</sub>

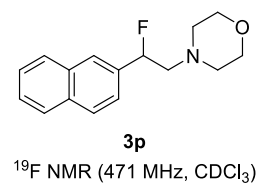

—176.5693



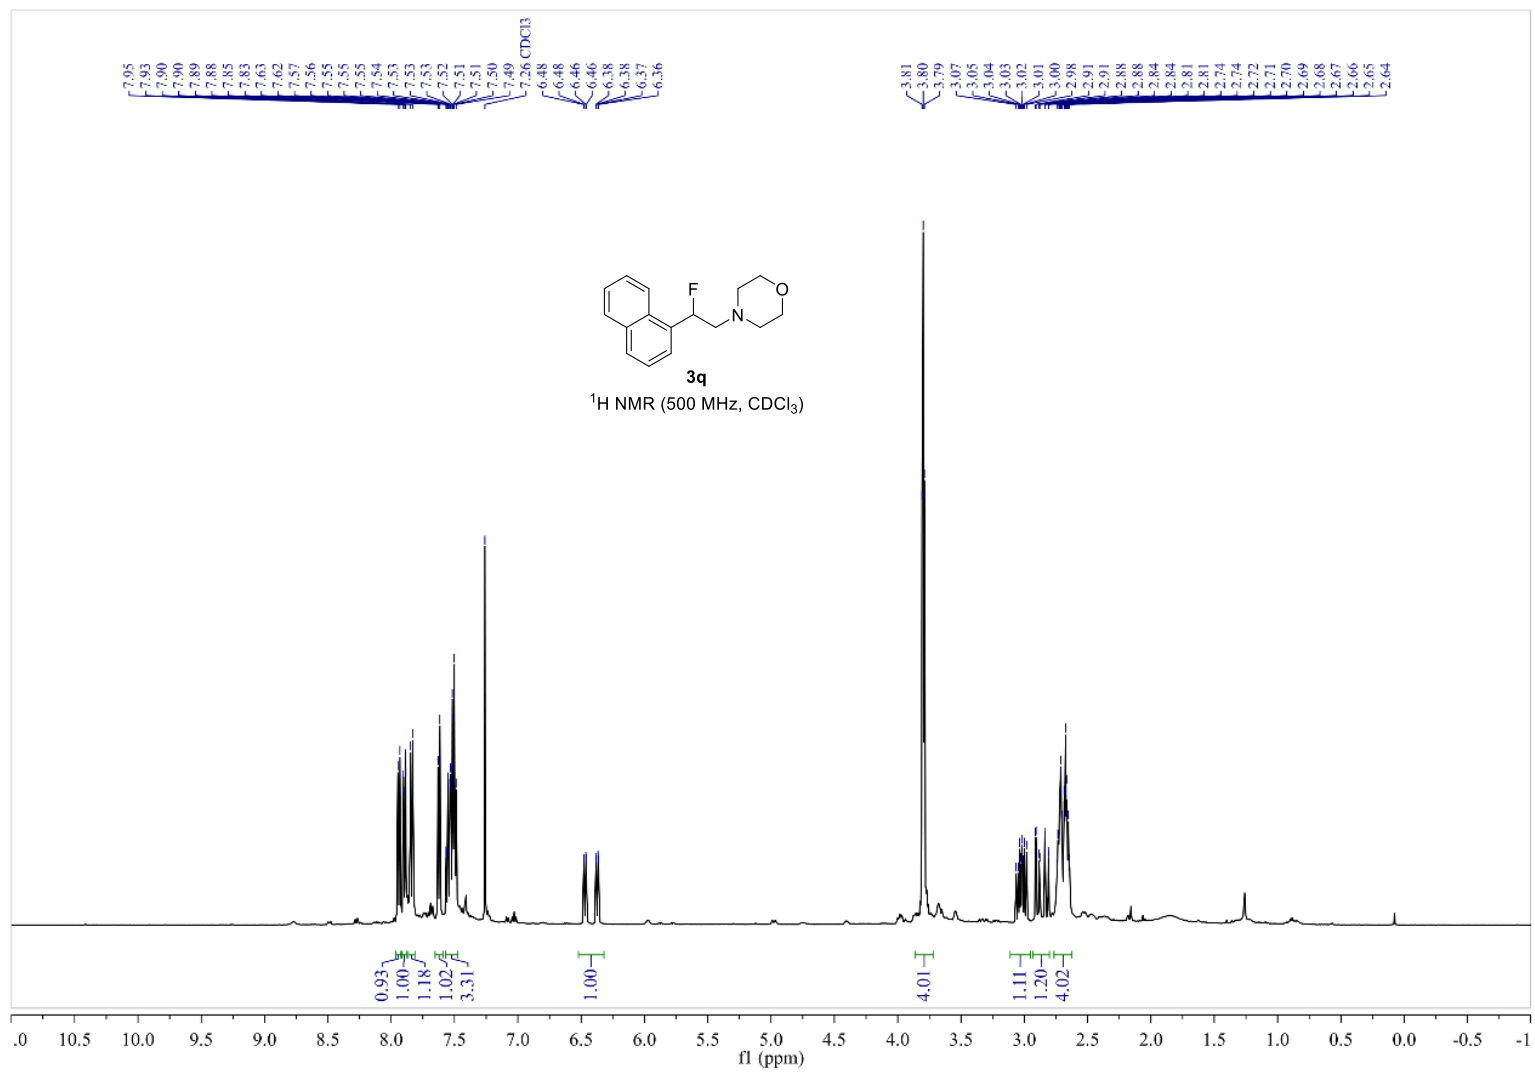

<sup>13</sup>CNMR gf-3-57bP in CDCl<sub>3</sub>

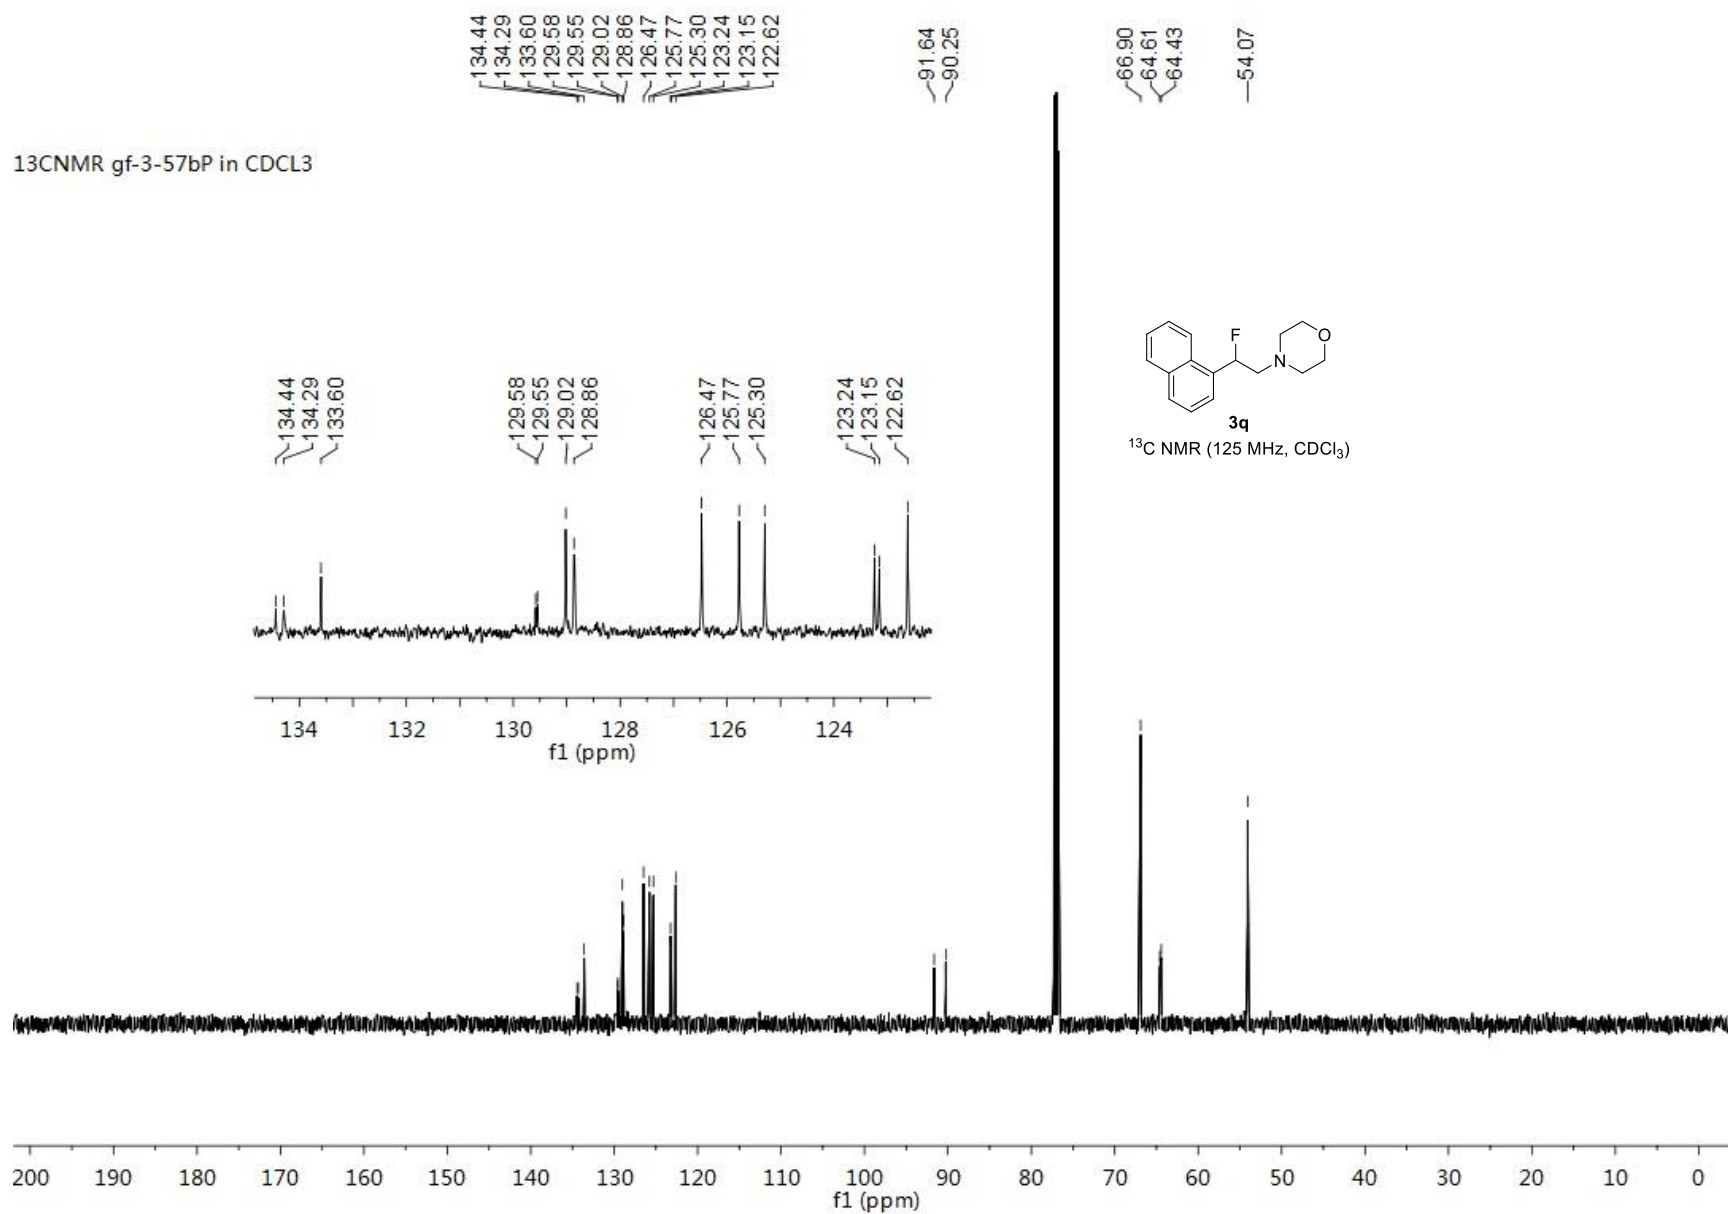

<sup>19</sup>F NMR gf-3-57bP in CDCl<sub>3</sub>

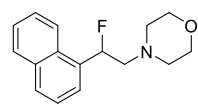

<sup>19</sup>F NMR (471 MHz, CDCl<sub>3</sub>)

---180.0677

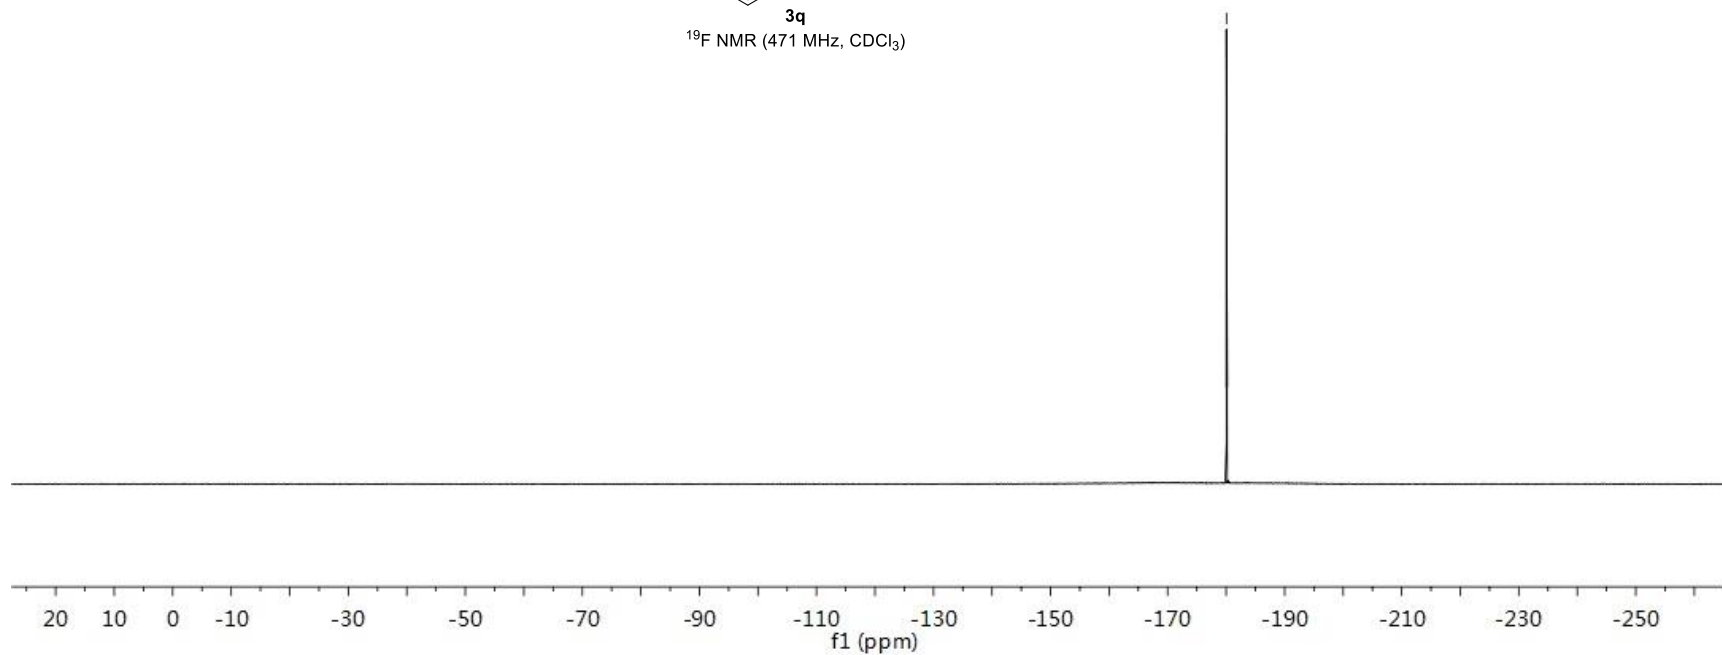

7.8872  
7.8724  
7.8368  
7.8215  
7.5024  
7.4276  
7.4154  
7.3976  
7.3816  
7.3675

6.0990  
6.0955  
6.0826  
5.9994  
5.9864

3.7824  
3.7732  
3.7640  
3.1721  
3.1459  
3.1291  
3.1174  
3.1095  
3.1006  
3.0927  
3.0809  
3.0642  
2.9582  
2.9500  
2.9328  
2.9283  
2.9044  
2.8998  
2.8668  
2.8622  
2.8382  
2.8336  
2.6987  
2.6769  
2.6573  
2.6482  
2.6391  
2.6256

<sup>1</sup>HMR gf-3-44aP in CDCl<sub>3</sub>

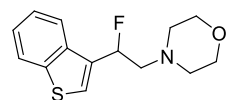

**3r**  
<sup>1</sup>H NMR (500 MHz, CDCl<sub>3</sub>)

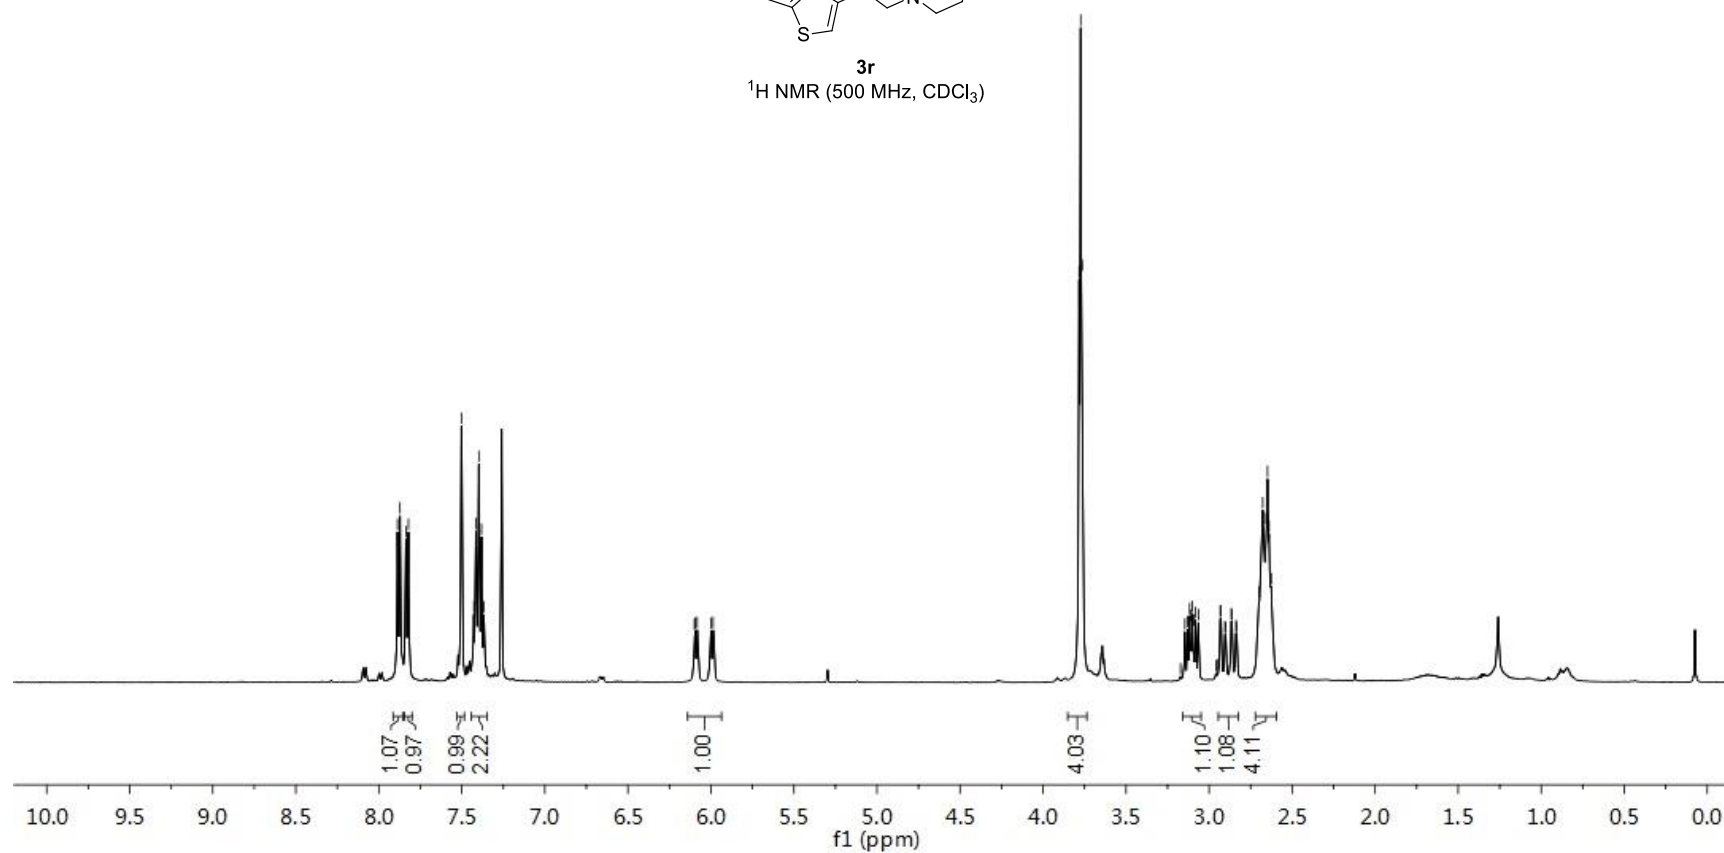

<sup>13</sup>CNMR gf-3-44aP in CDCl<sub>3</sub>

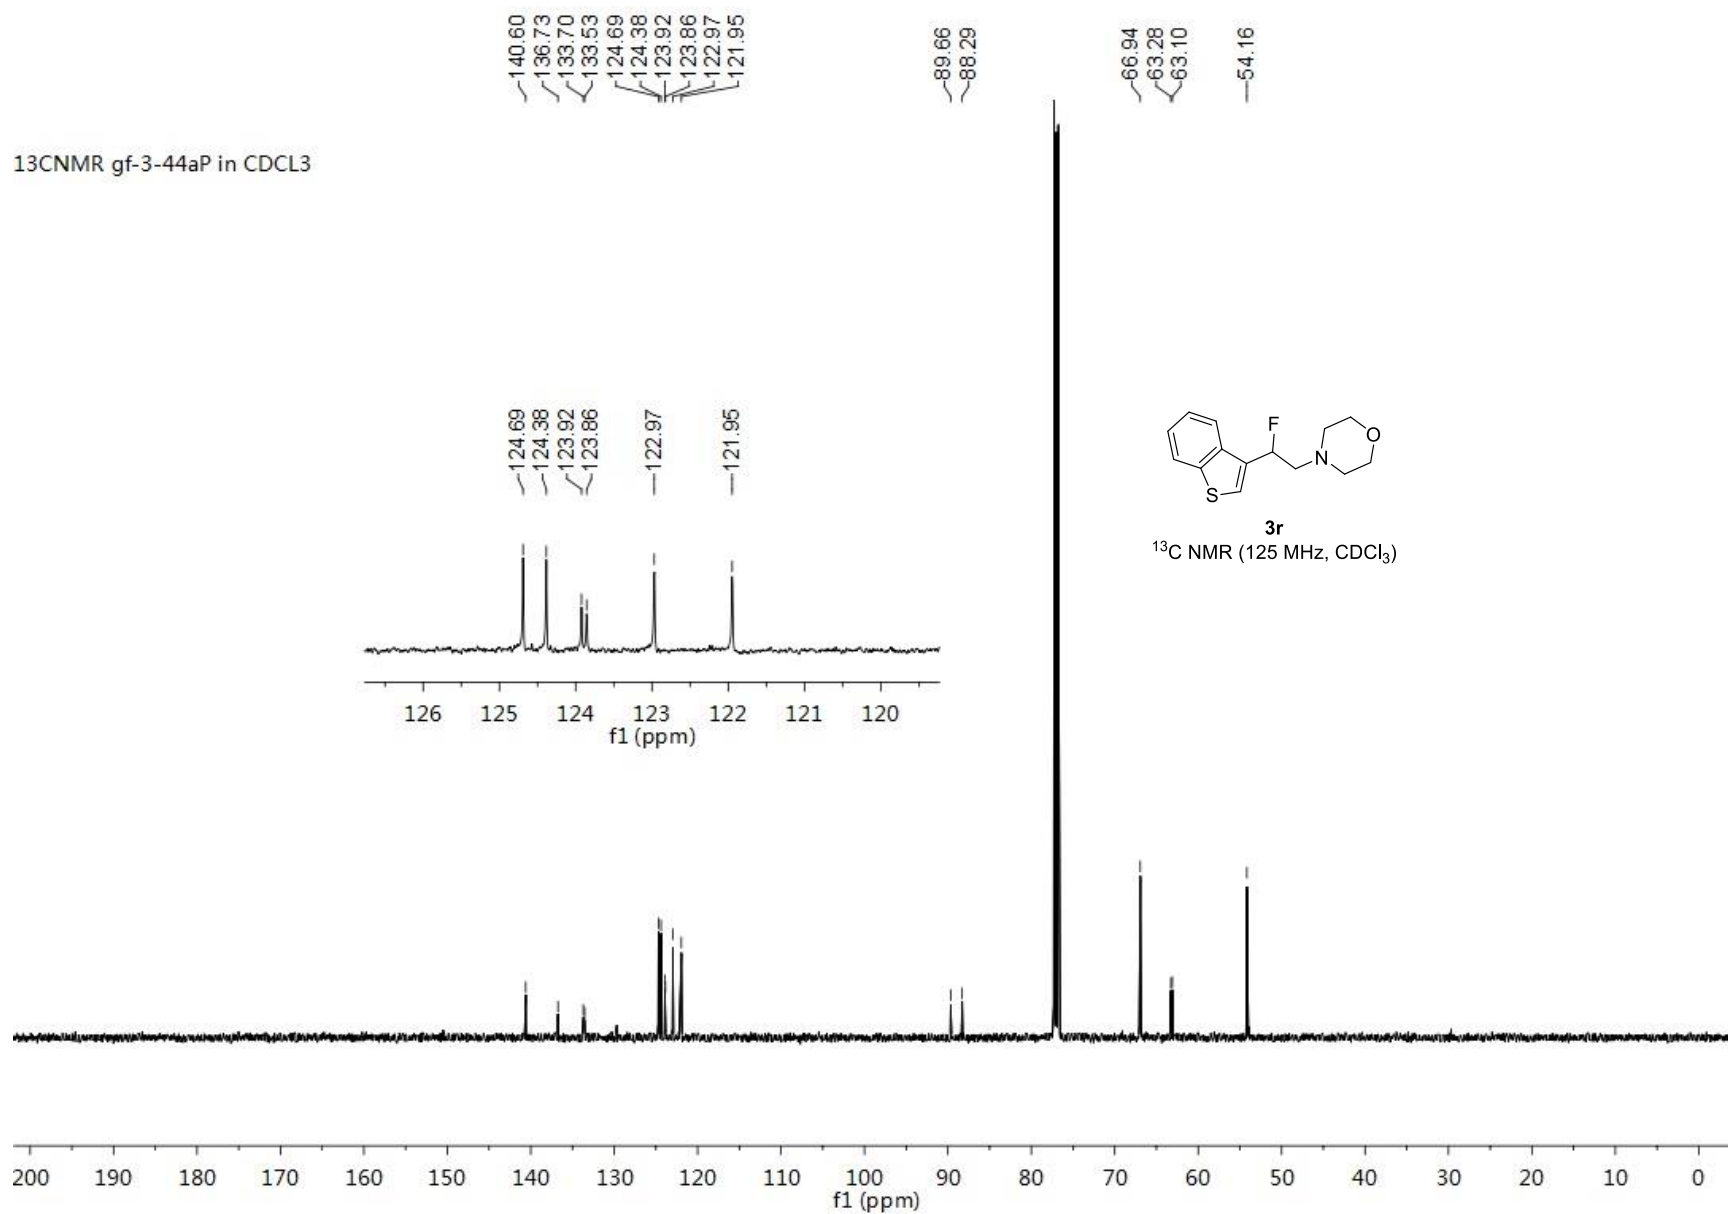



<sup>19</sup>F NMR gf-3-44aP in CDCl<sub>3</sub>

—175.7704

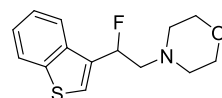

**3r**

<sup>19</sup>F NMR (471 MHz, CDCl<sub>3</sub>)

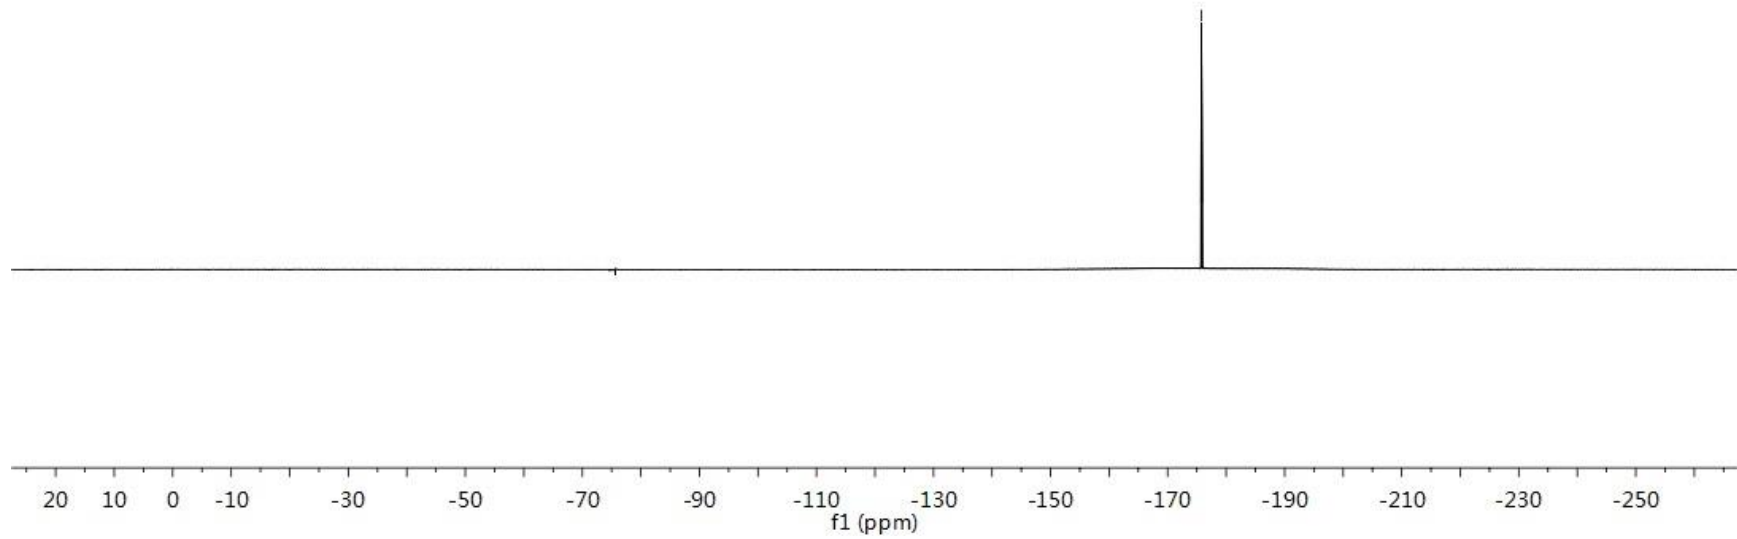

7.9892  
7.9725  
7.7845  
7.7679  
7.6359  
7.6311  
7.6079  
7.5922  
7.3576  
7.3425  
7.3273  
7.2722  
7.2599  
7.2440  
7.2281

5.9673  
5.9539  
5.8703  
5.8575

3.7599  
3.7510  
3.7420  
3.1341  
3.1177  
3.1058  
3.0983  
3.0895  
3.0821  
3.0701  
3.0537  
2.9016  
2.8742  
2.8418  
2.8132  
2.7297  
2.6531  
2.6274  
2.5564  
2.3484

<sup>1</sup>H NMR of 3-43cP in CDCl<sub>3</sub>

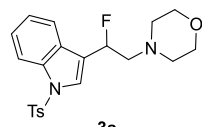

<sup>1</sup>H NMR (500 MHz, CDCl<sub>3</sub>)

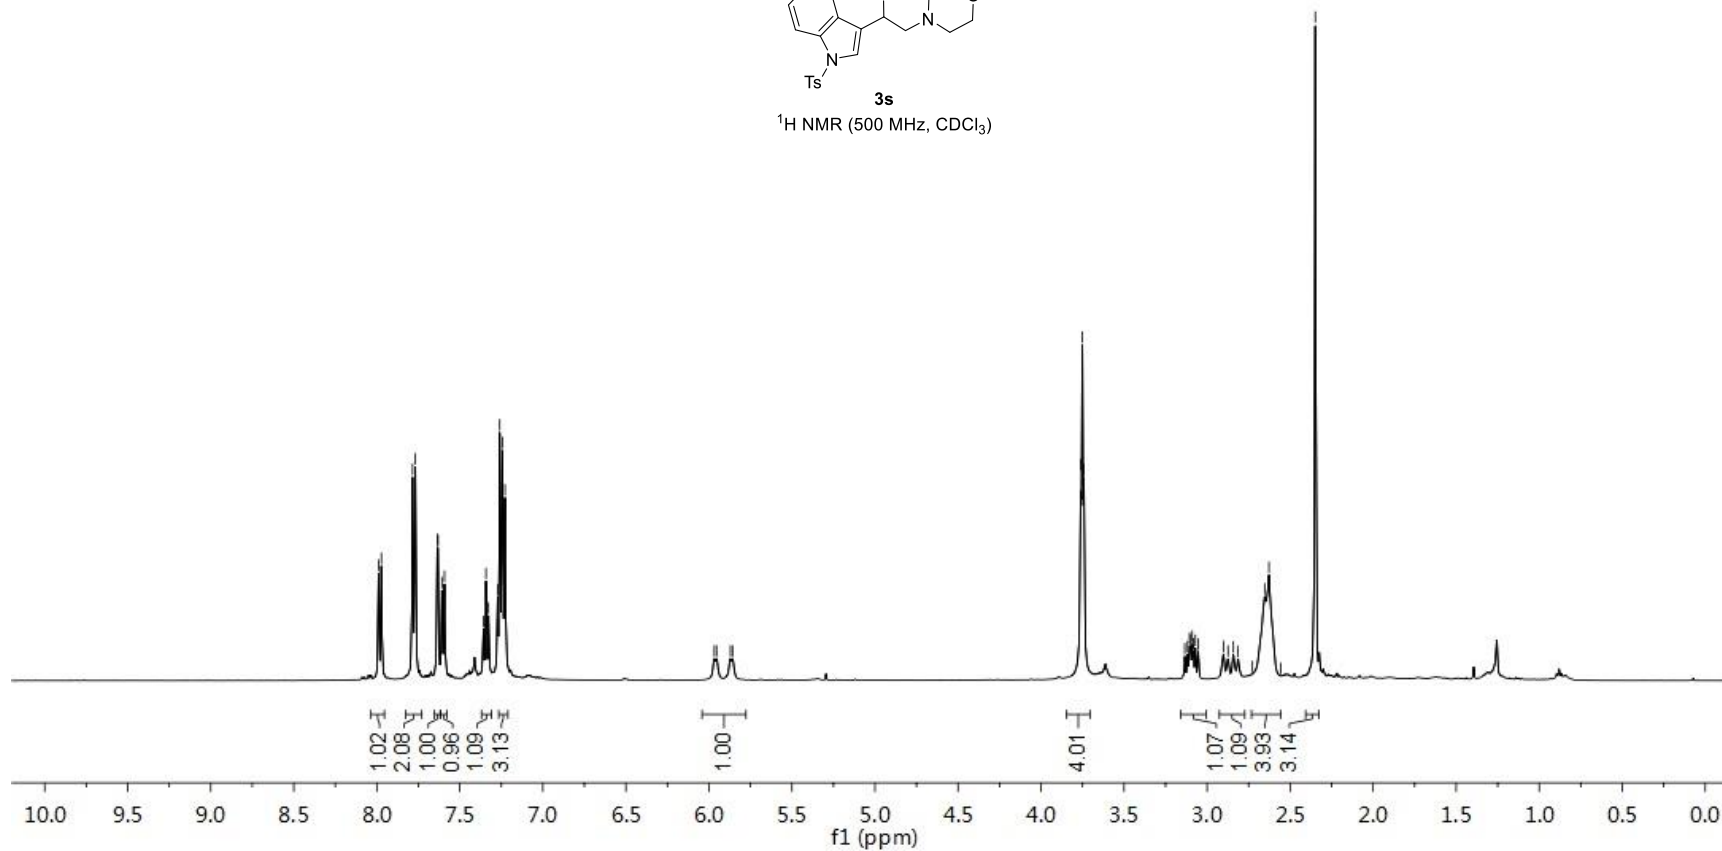

<sup>13</sup>C NMR gf-3-43cP in CDCl<sub>3</sub>

145.27  
135.15  
135.09  
130.01  
126.92  
125.17  
123.78  
123.70  
123.49  
119.76

87.86  
86.51

66.85  
62.87  
62.69

54.14

21.60

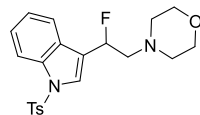

<sup>13</sup>C NMR (125 MHz, CDCl<sub>3</sub>)

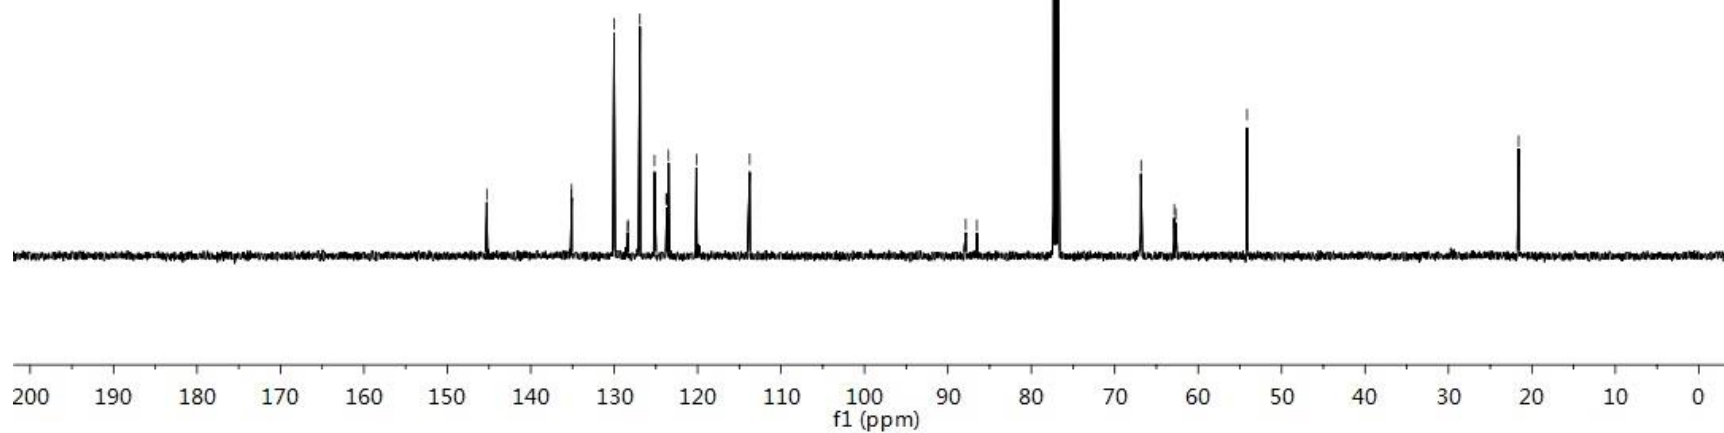

<sup>19</sup>F NMR gf-3-43cP in CDCl<sub>3</sub>

---175.4343

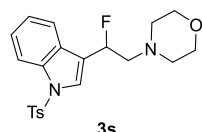

<sup>19</sup>F NMR (471 MHz, CDCl<sub>3</sub>)

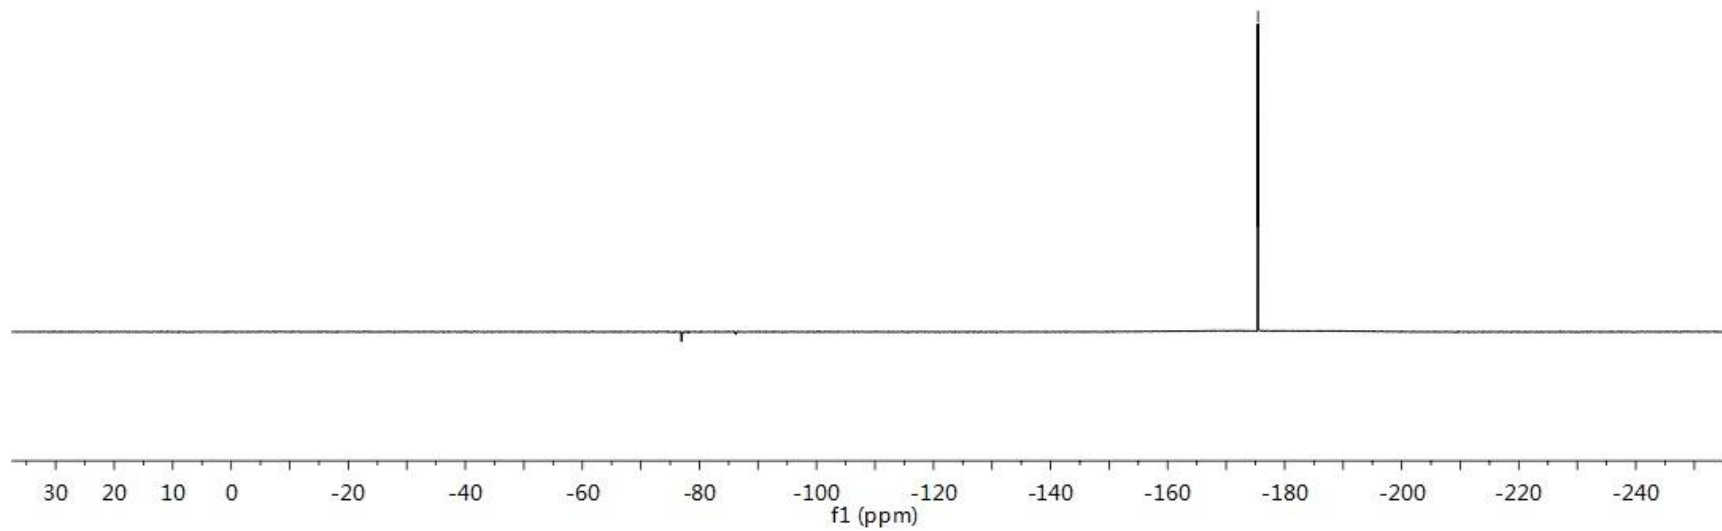

S115

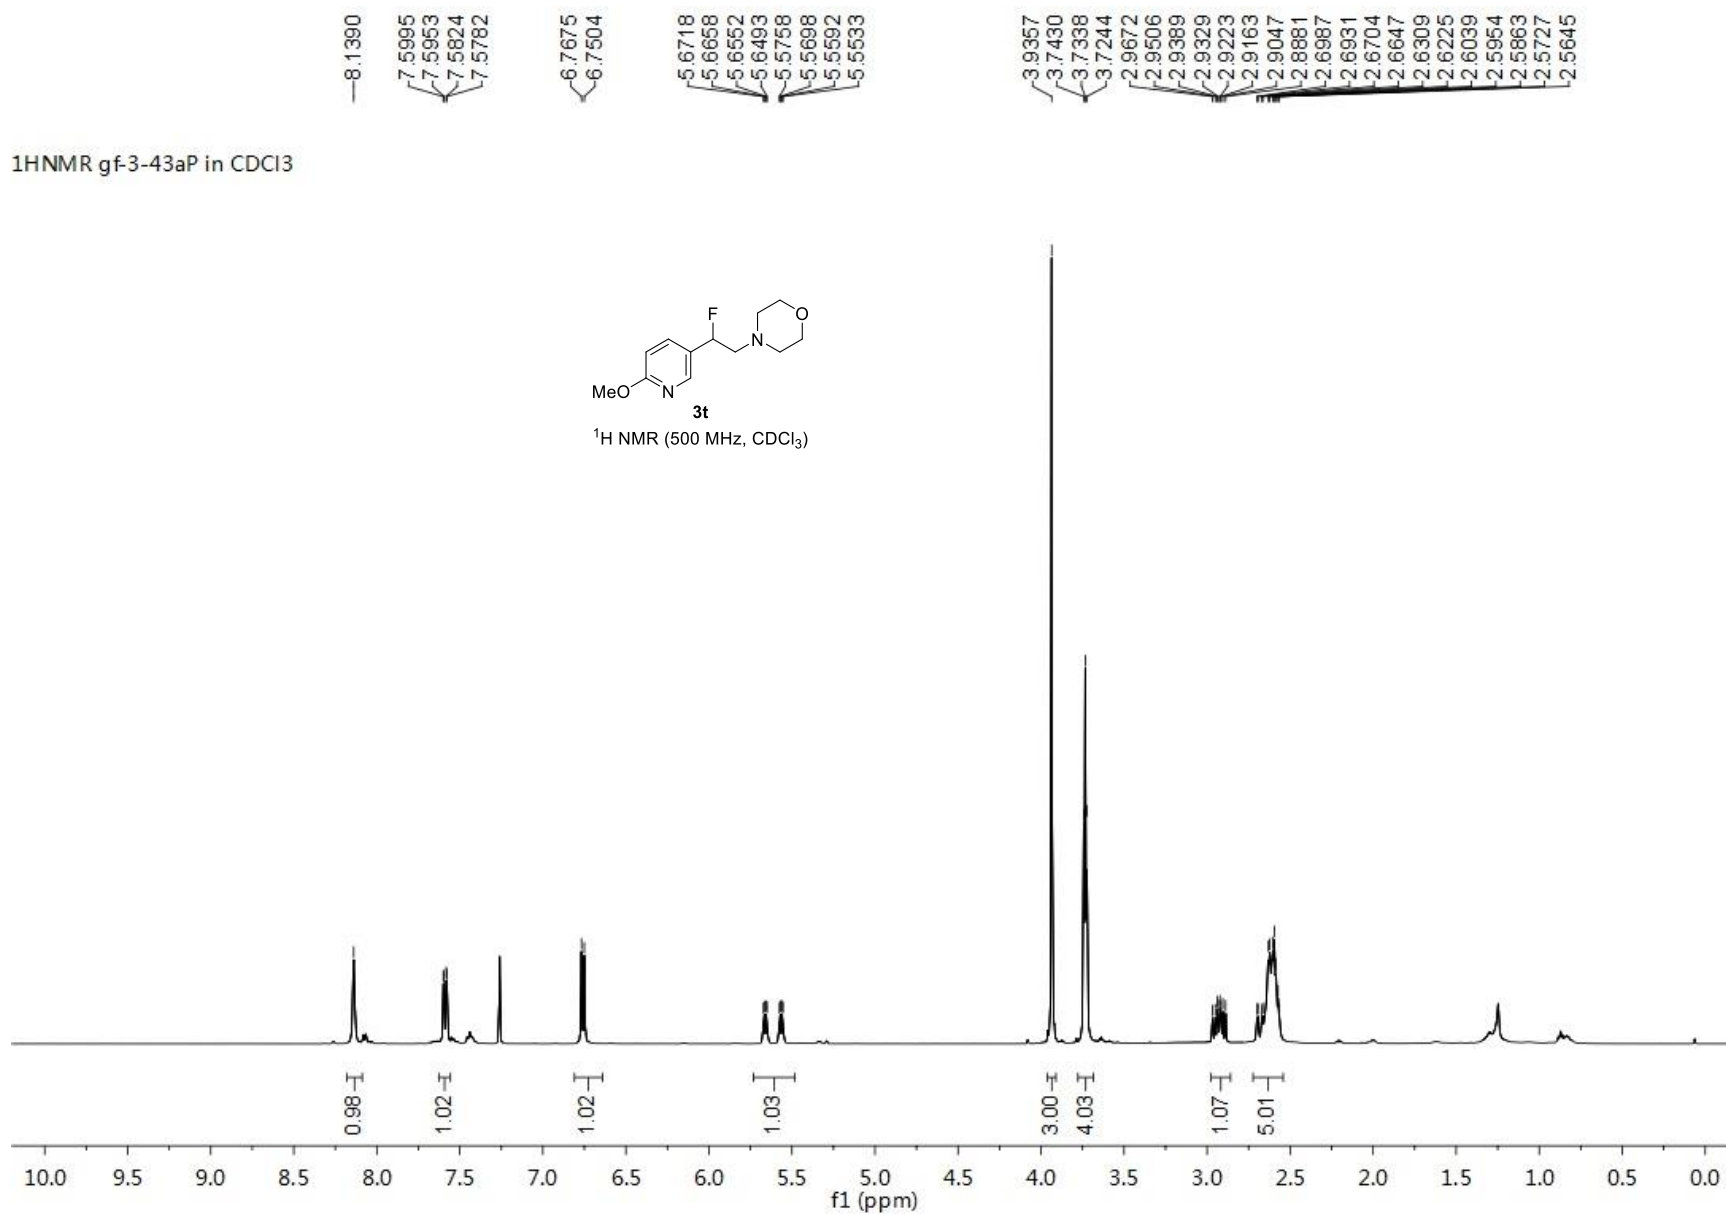

164.48  
164.47  
144.92  
144.86  
136.46  
136.42  
127.10  
126.93  
110.99  
91.31  
89.94  
66.86  
64.20  
64.01  
54.11  
53.59

<sup>13</sup>CNMR gf-3-43aP in CDCl<sub>3</sub>

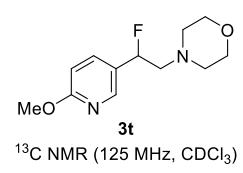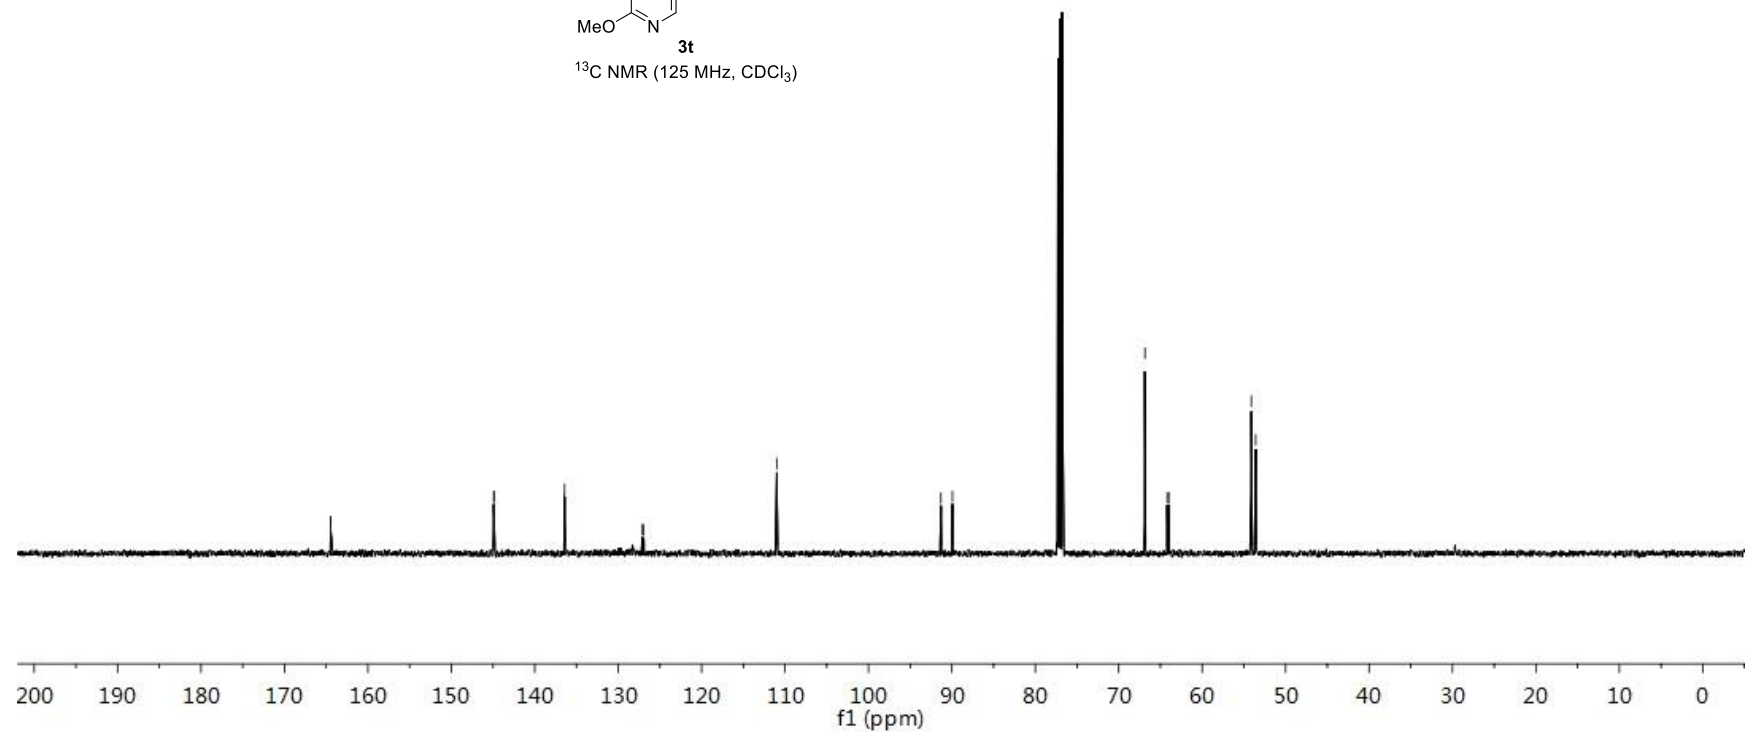

<sup>19</sup>F NMR gf-3-43aP in CDCl<sub>3</sub>

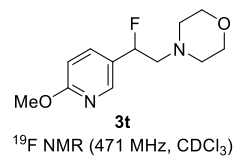

—174.2810

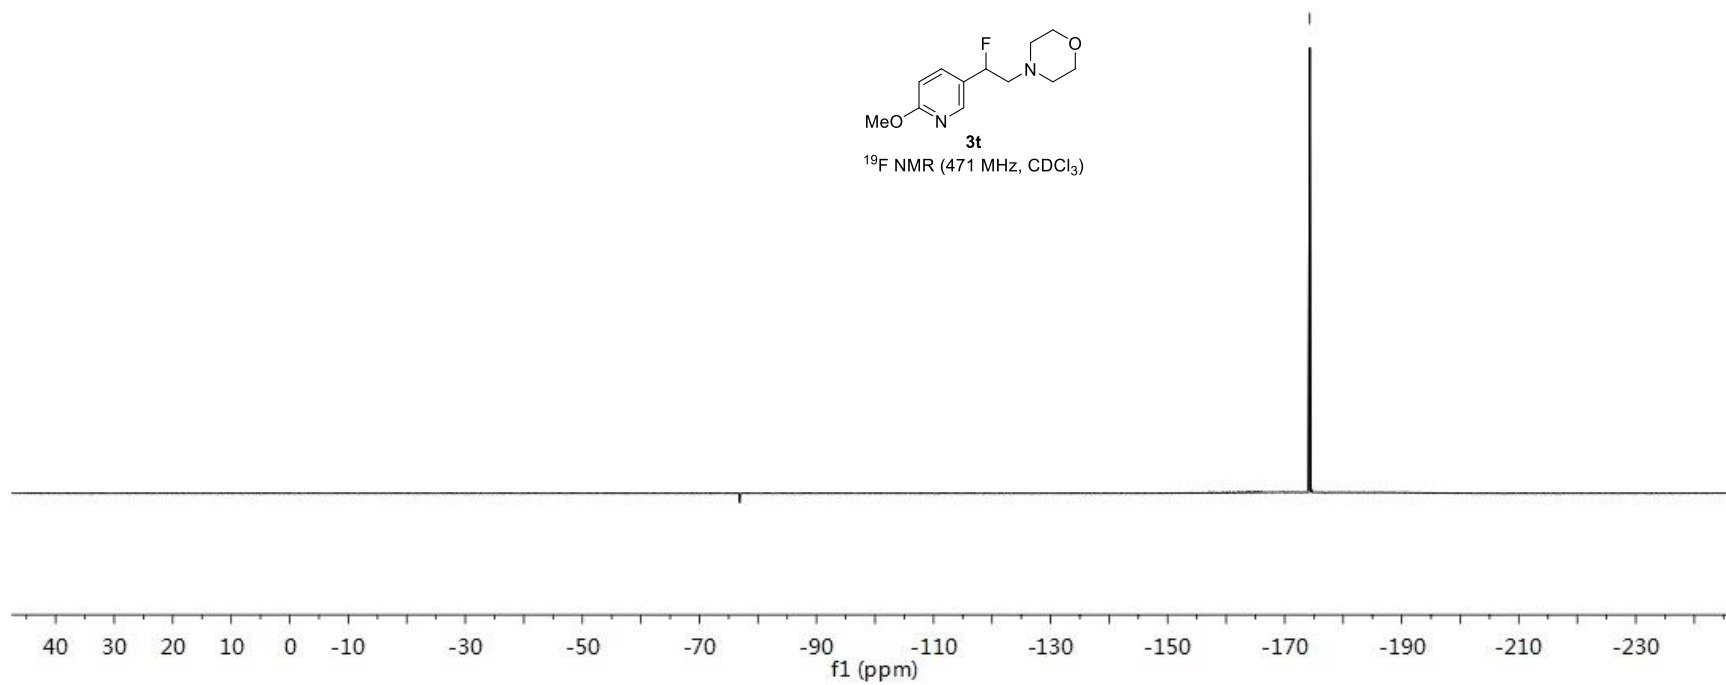

7.3092  
7.2941  
7.2791  
7.2602  
7.2092  
7.2009  
7.1933  
4.7336  
4.7255  
4.7173  
4.6339  
4.6255  
4.6174  
3.7204  
3.7111  
3.7017  
3.7017  
2.8538  
2.8433  
2.8345  
2.8254  
2.8157  
2.8069  
2.7964  
2.7369  
2.7222  
2.7184  
2.7090  
2.7039  
2.6946  
2.6909  
2.6784  
2.6638  
2.6510  
2.6399  
2.6361  
2.6251  
2.6123  
2.5973  
2.5173  
2.5107  
2.5006  
2.4897  
2.4839  
2.4561  
2.4505  
2.4283  
2.4227  
2.0331  
2.0225  
2.0120  
2.0044  
1.9917  
1.9866  
1.9810  
1.9734  
1.9629  
1.9255  
1.9187  
1.9136  
1.9113  
1.9059  
1.8994  
1.8913  
1.8706  
1.8631  
1.8560  
1.8487  
1.8432  
1.8366  
1.8287

<sup>1</sup>H NMR of 3-139dP in CDCl<sub>3</sub>

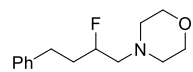

**3u**  
<sup>1</sup>H NMR (500 MHz, CDCl<sub>3</sub>)

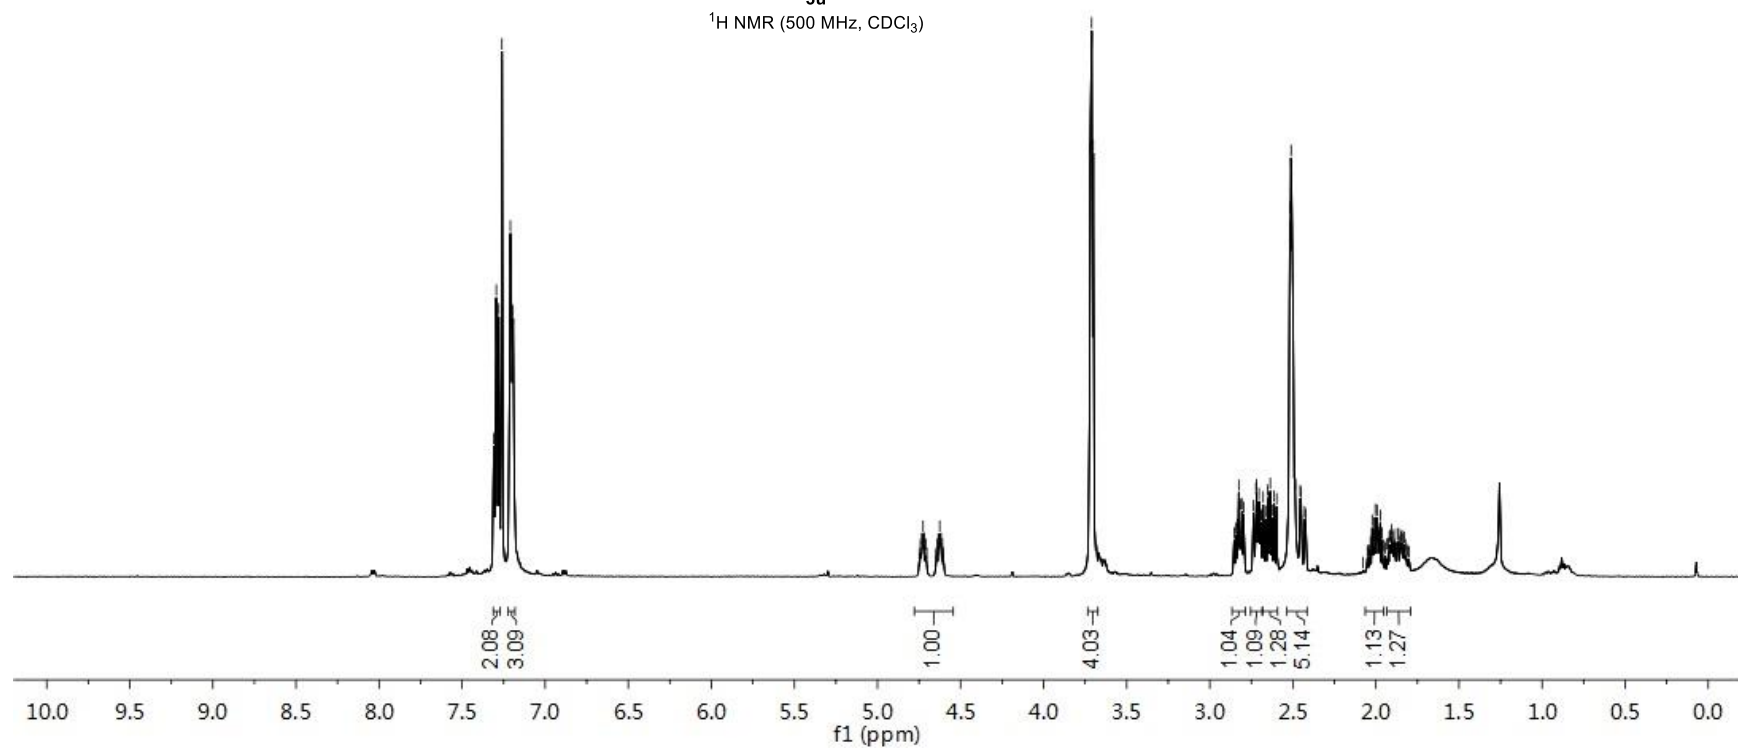



<sup>13</sup>CNMR gf-3-139dP in CDCl<sub>3</sub>

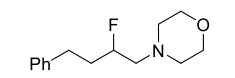

<sup>13</sup>C NMR (125 MHz, CDCl<sub>3</sub>)

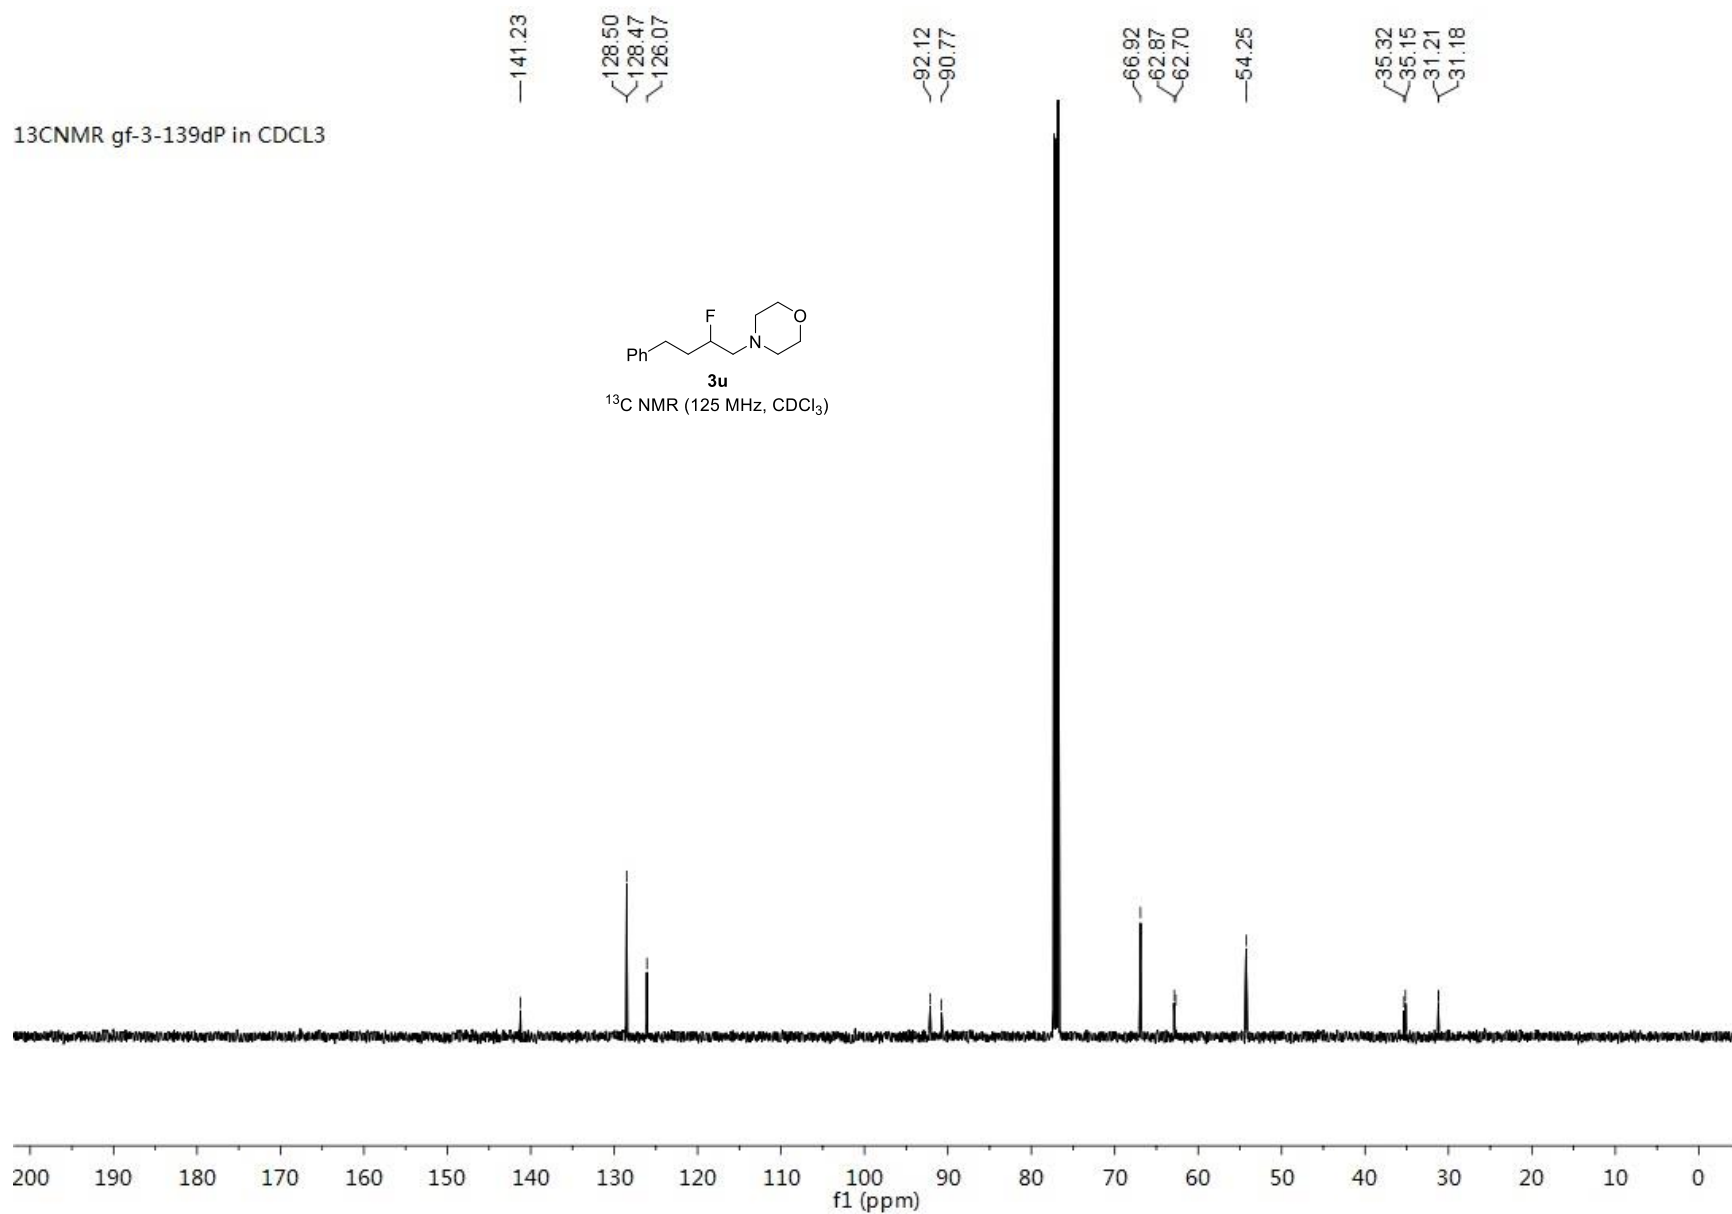

<sup>19</sup>F NMR gf-3-139dP in CDCl<sub>3</sub>

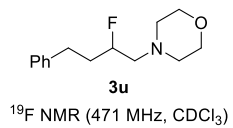

— -182.1342

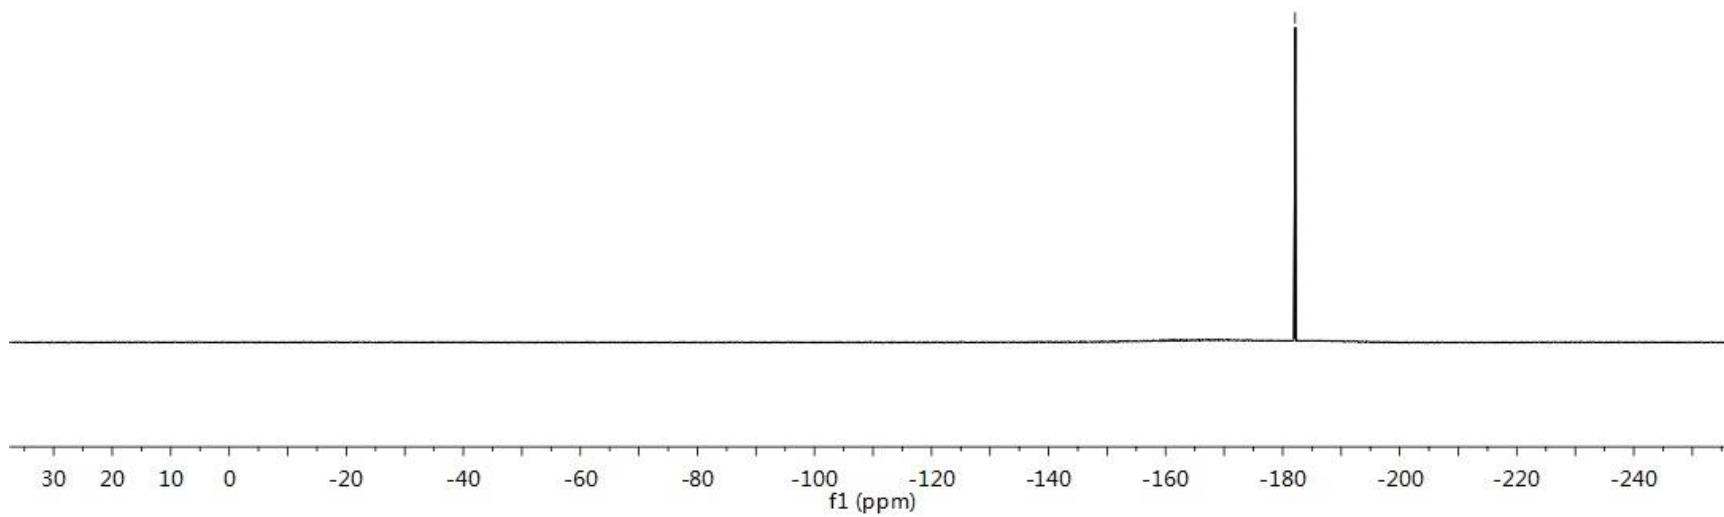

<sup>1</sup>H NMR of **3v-I** in CDCl<sub>3</sub>

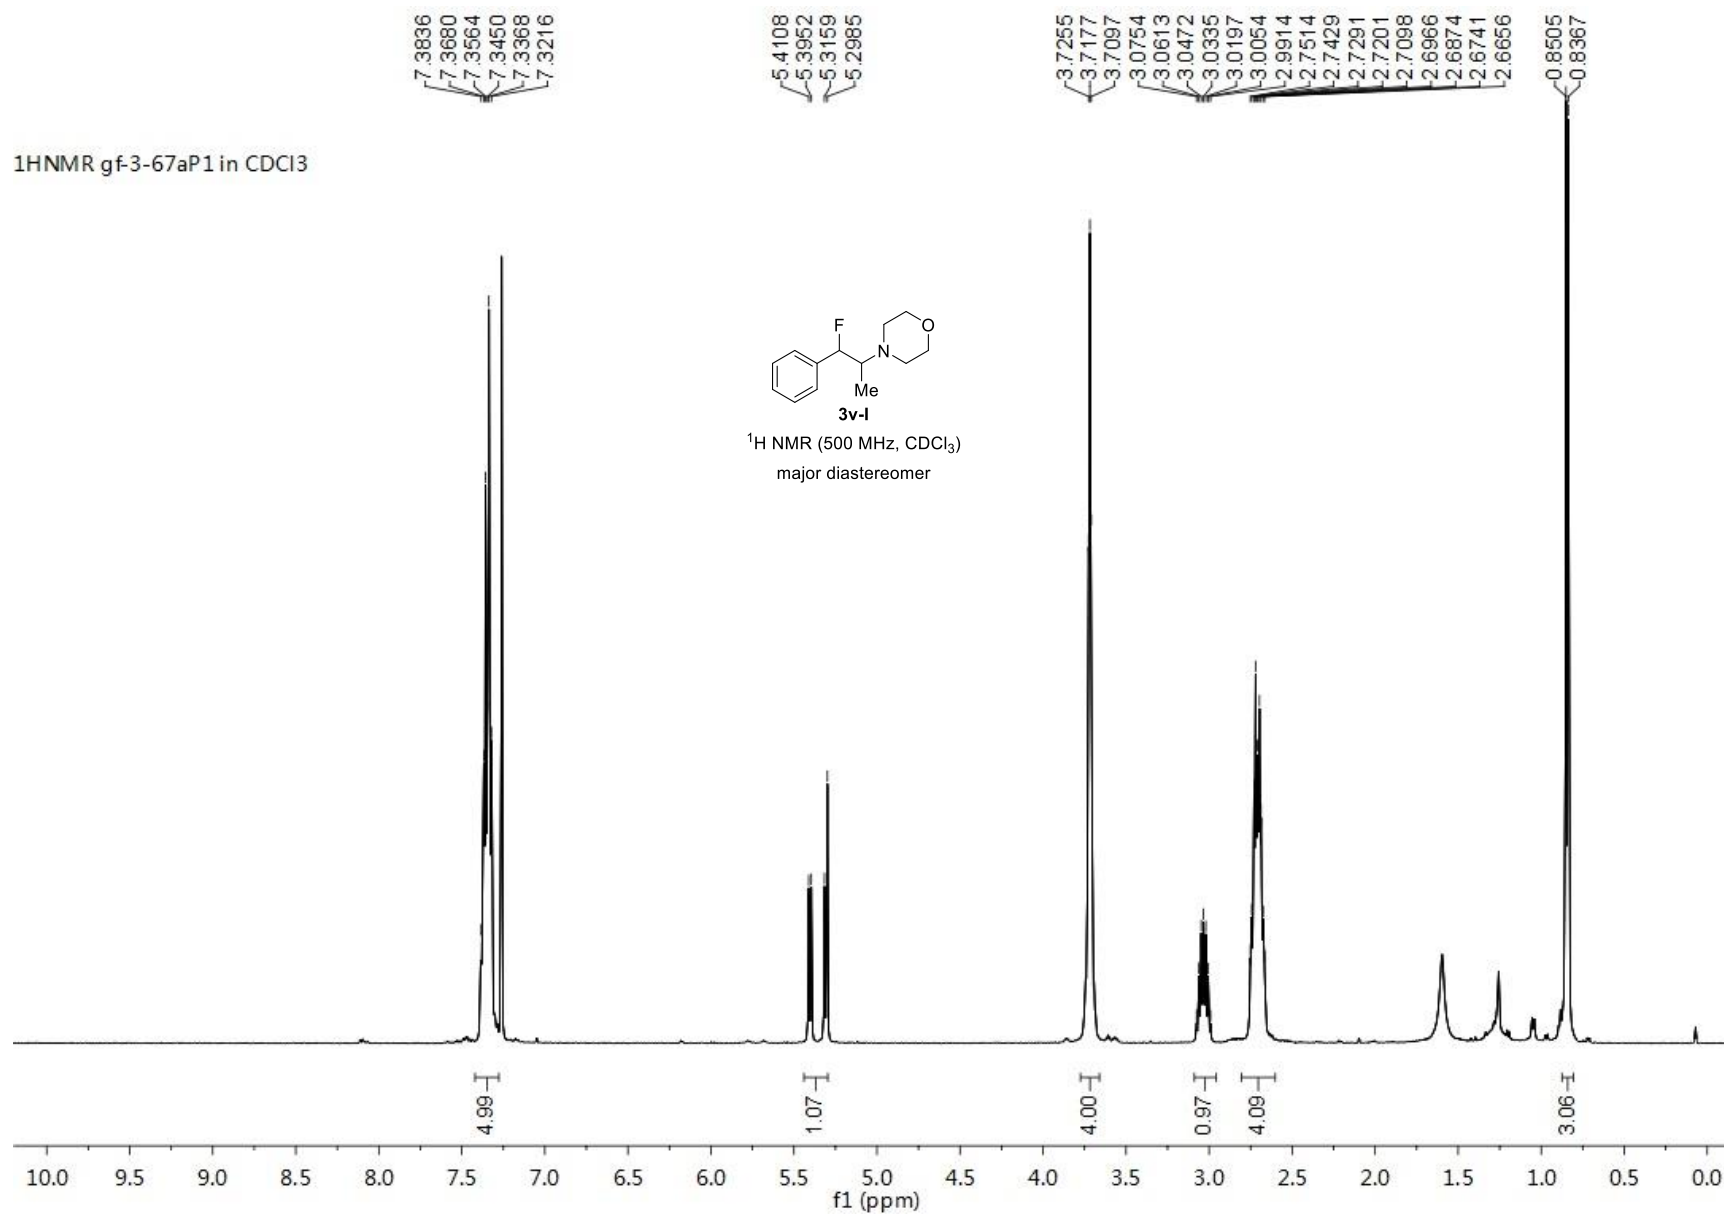

<sup>13</sup>C NMR gf-4-66cP1 in CDCl<sub>3</sub>

138.62  
138.46  
128.52  
128.50  
128.33  
126.70  
126.65

96.46  
95.06

67.59  
63.56  
63.39

49.64

11.25  
11.20

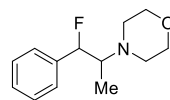

**3v-I**

<sup>13</sup>C NMR (125 MHz, CDCl<sub>3</sub>)  
major diastereomer

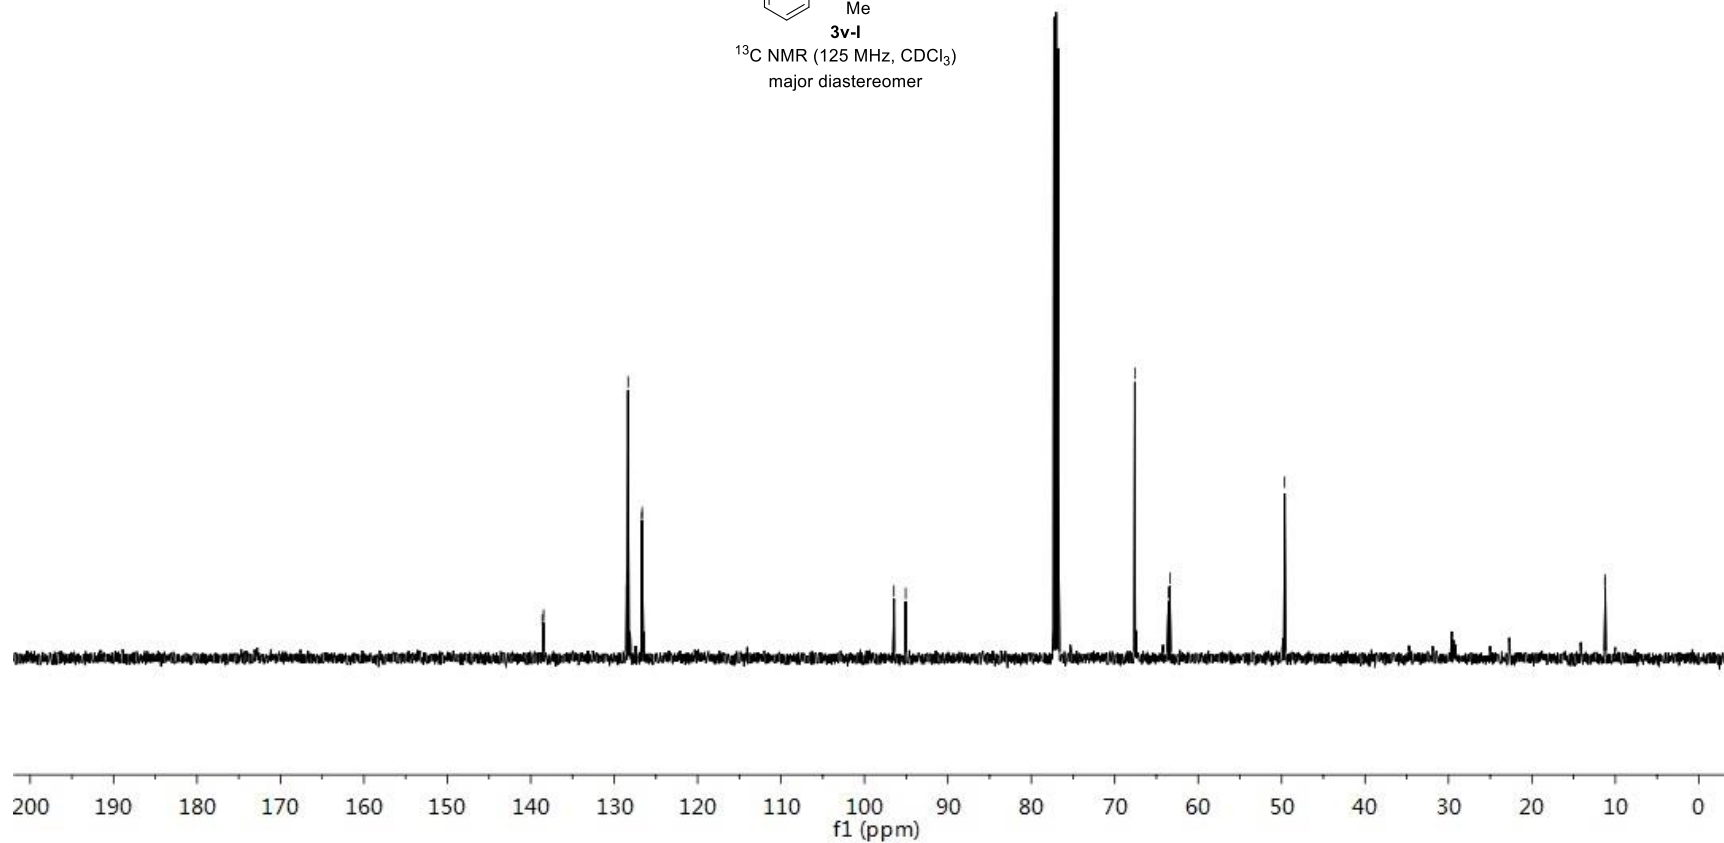

<sup>19</sup>F NMR gf-3-67aP1 in CDCl<sub>3</sub>

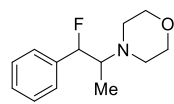

<sup>19</sup>F NMR (471 MHz, CDCl<sub>3</sub>)  
major diastereomer

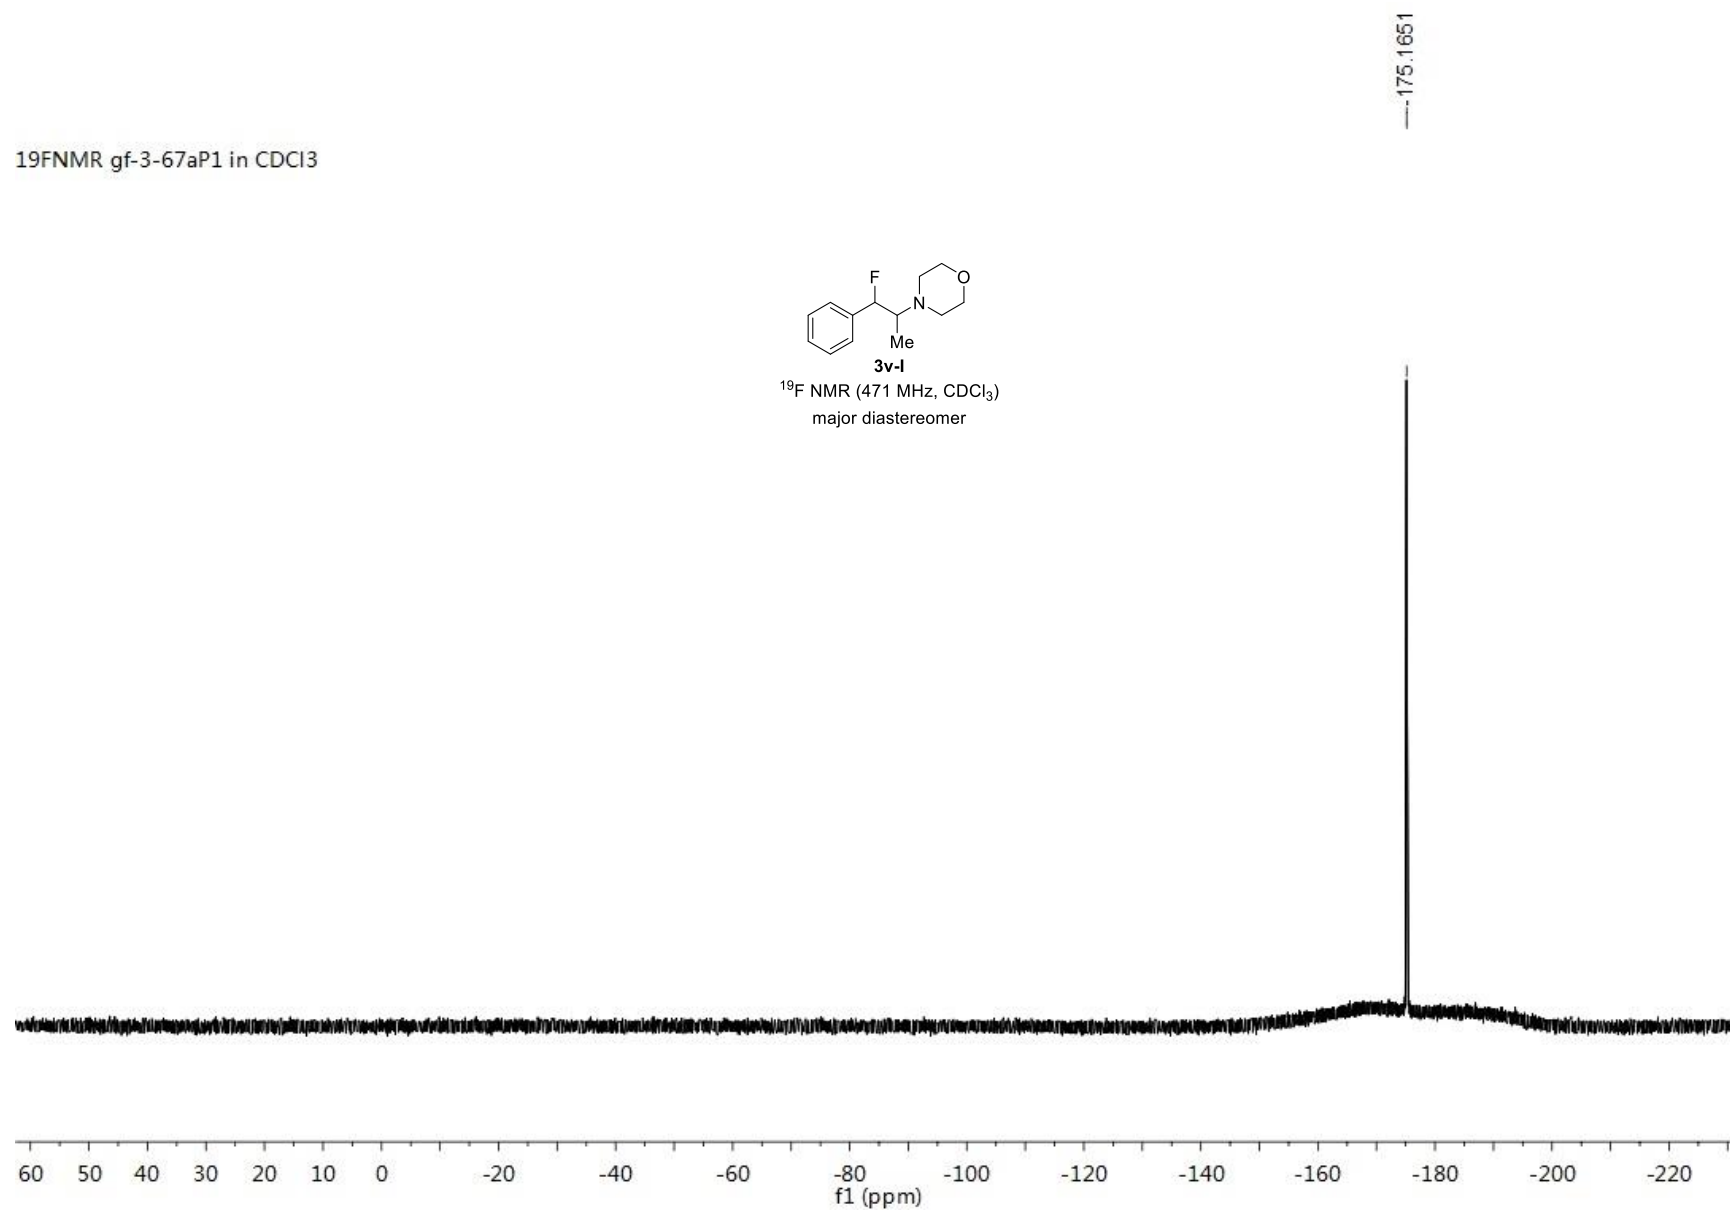

<sup>1</sup>H NMR of gf-4-66cP2 in CDCl<sub>3</sub>

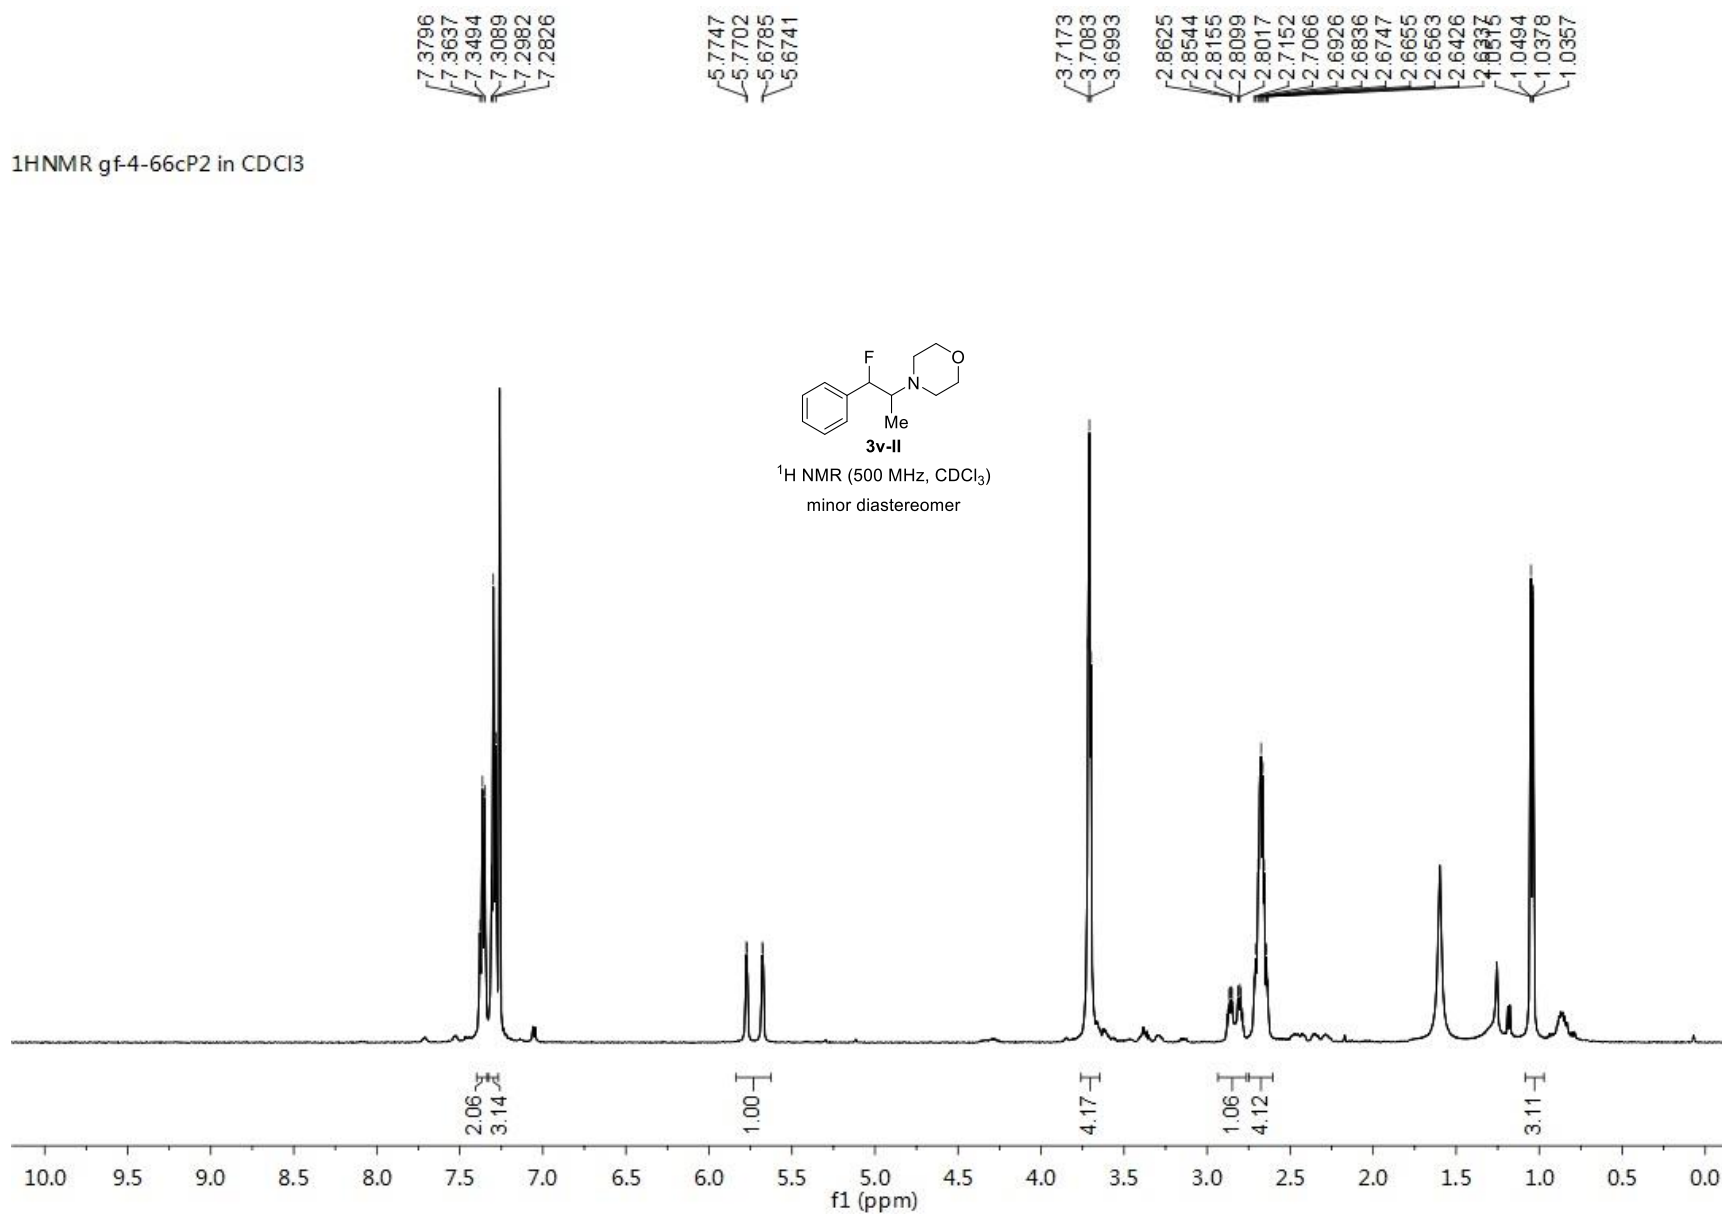

<sup>13</sup>CNMR gf-4-66cP2 in CDCl<sub>3</sub>

139.54  
139.37  
128.21  
127.72  
125.13  
125.07  
95.41  
93.99  
67.47  
65.02  
64.85  
49.93  
7.65  
7.60

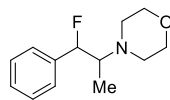

**3v-II**

<sup>13</sup>C NMR (125 MHz, CDCl<sub>3</sub>)  
minor diastereomer

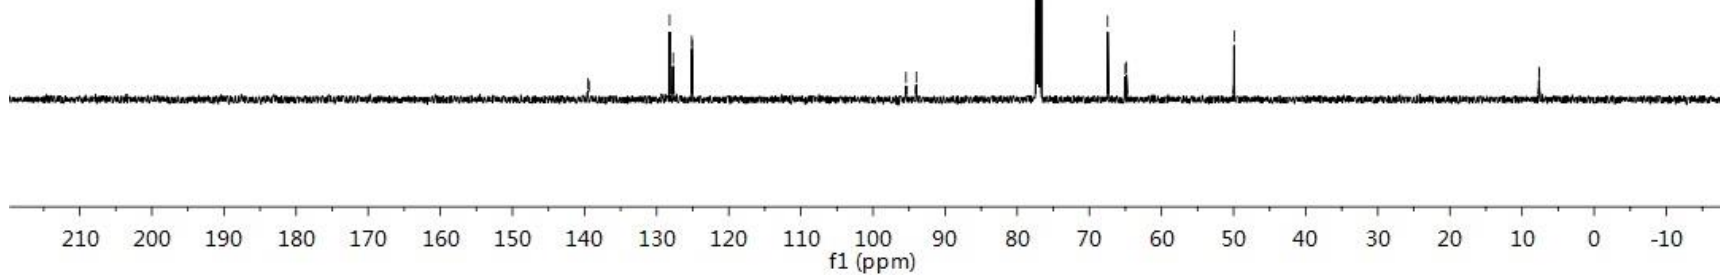

<sup>19</sup>F NMR gf-4-66cP2 in CDCl<sub>3</sub>

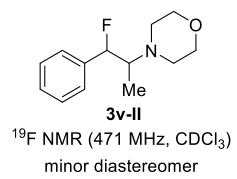

---193.6840

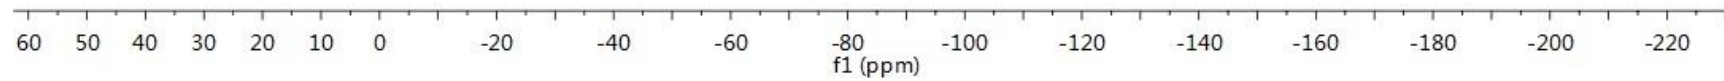



<sup>1</sup>H NMR of compound 3w-I in CDCl<sub>3</sub>

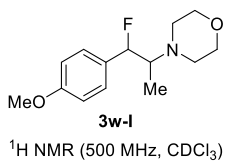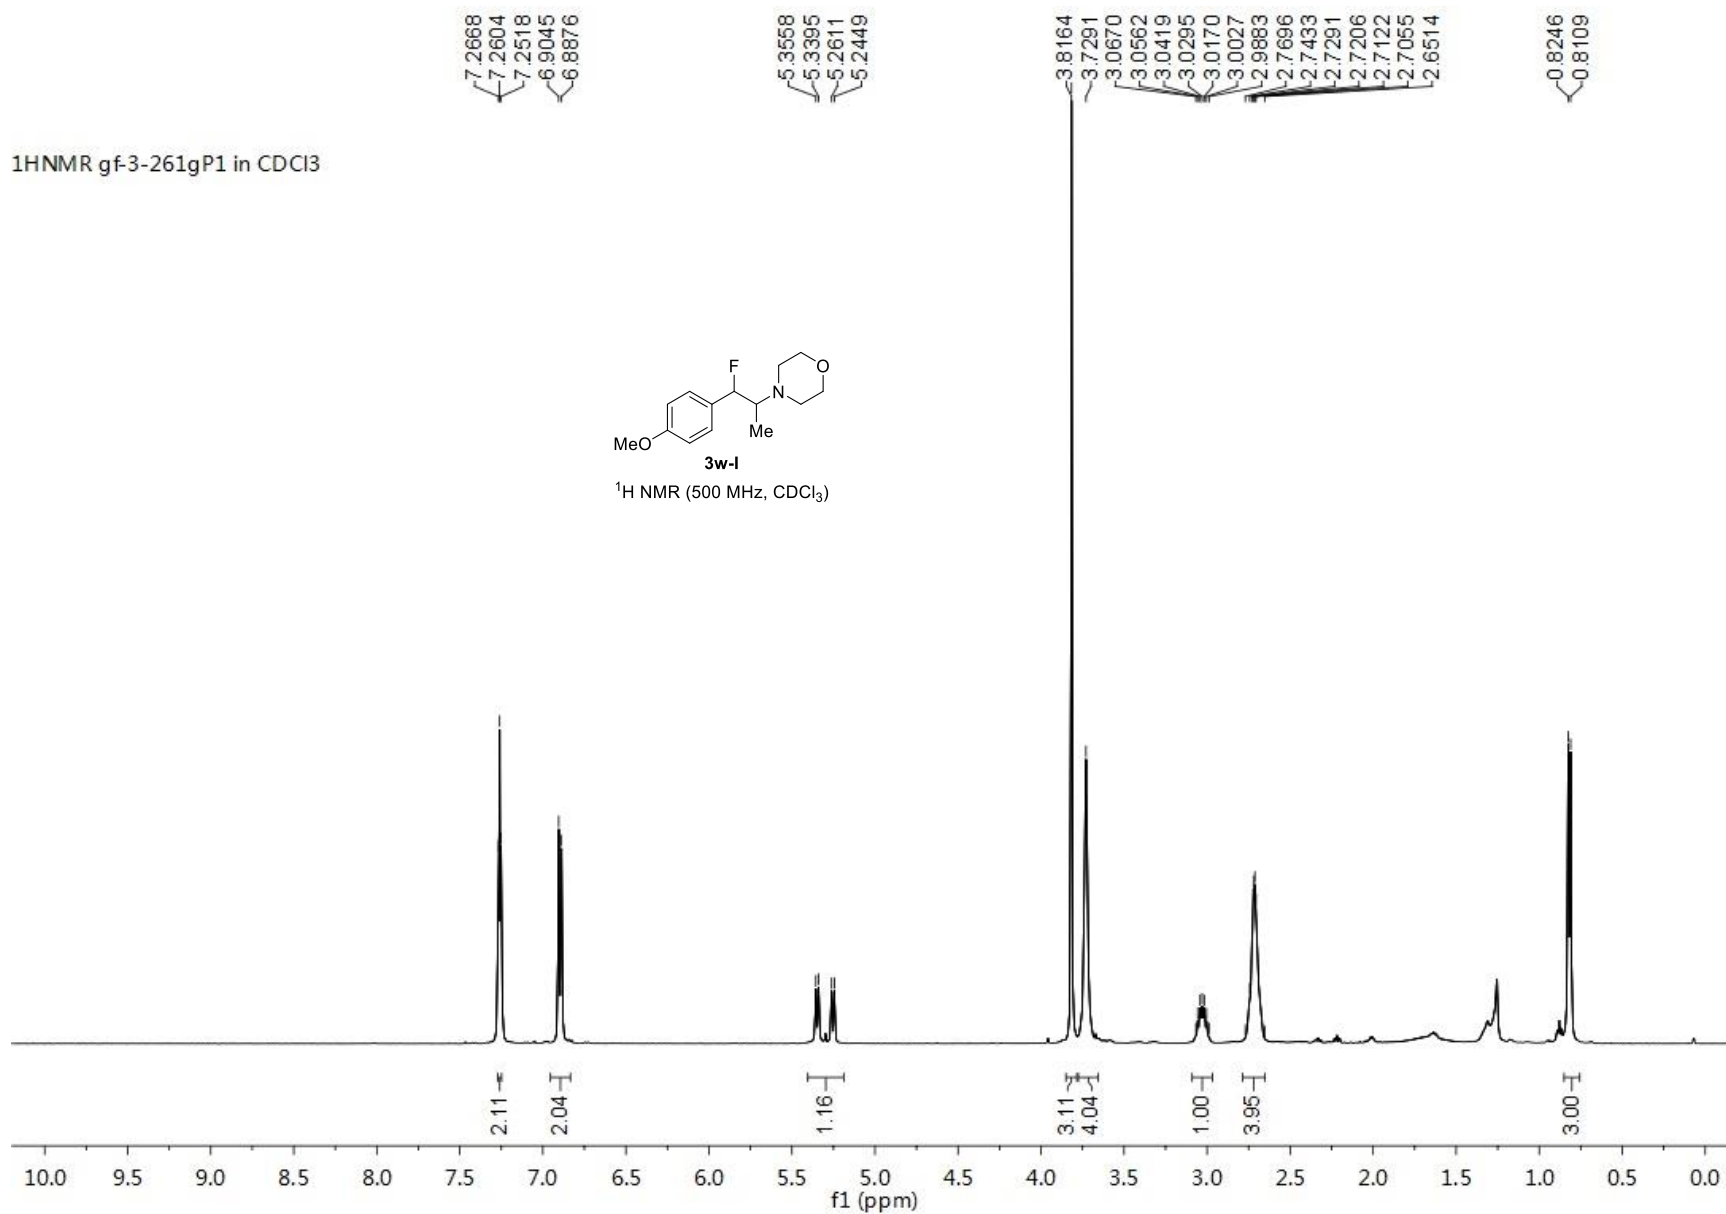

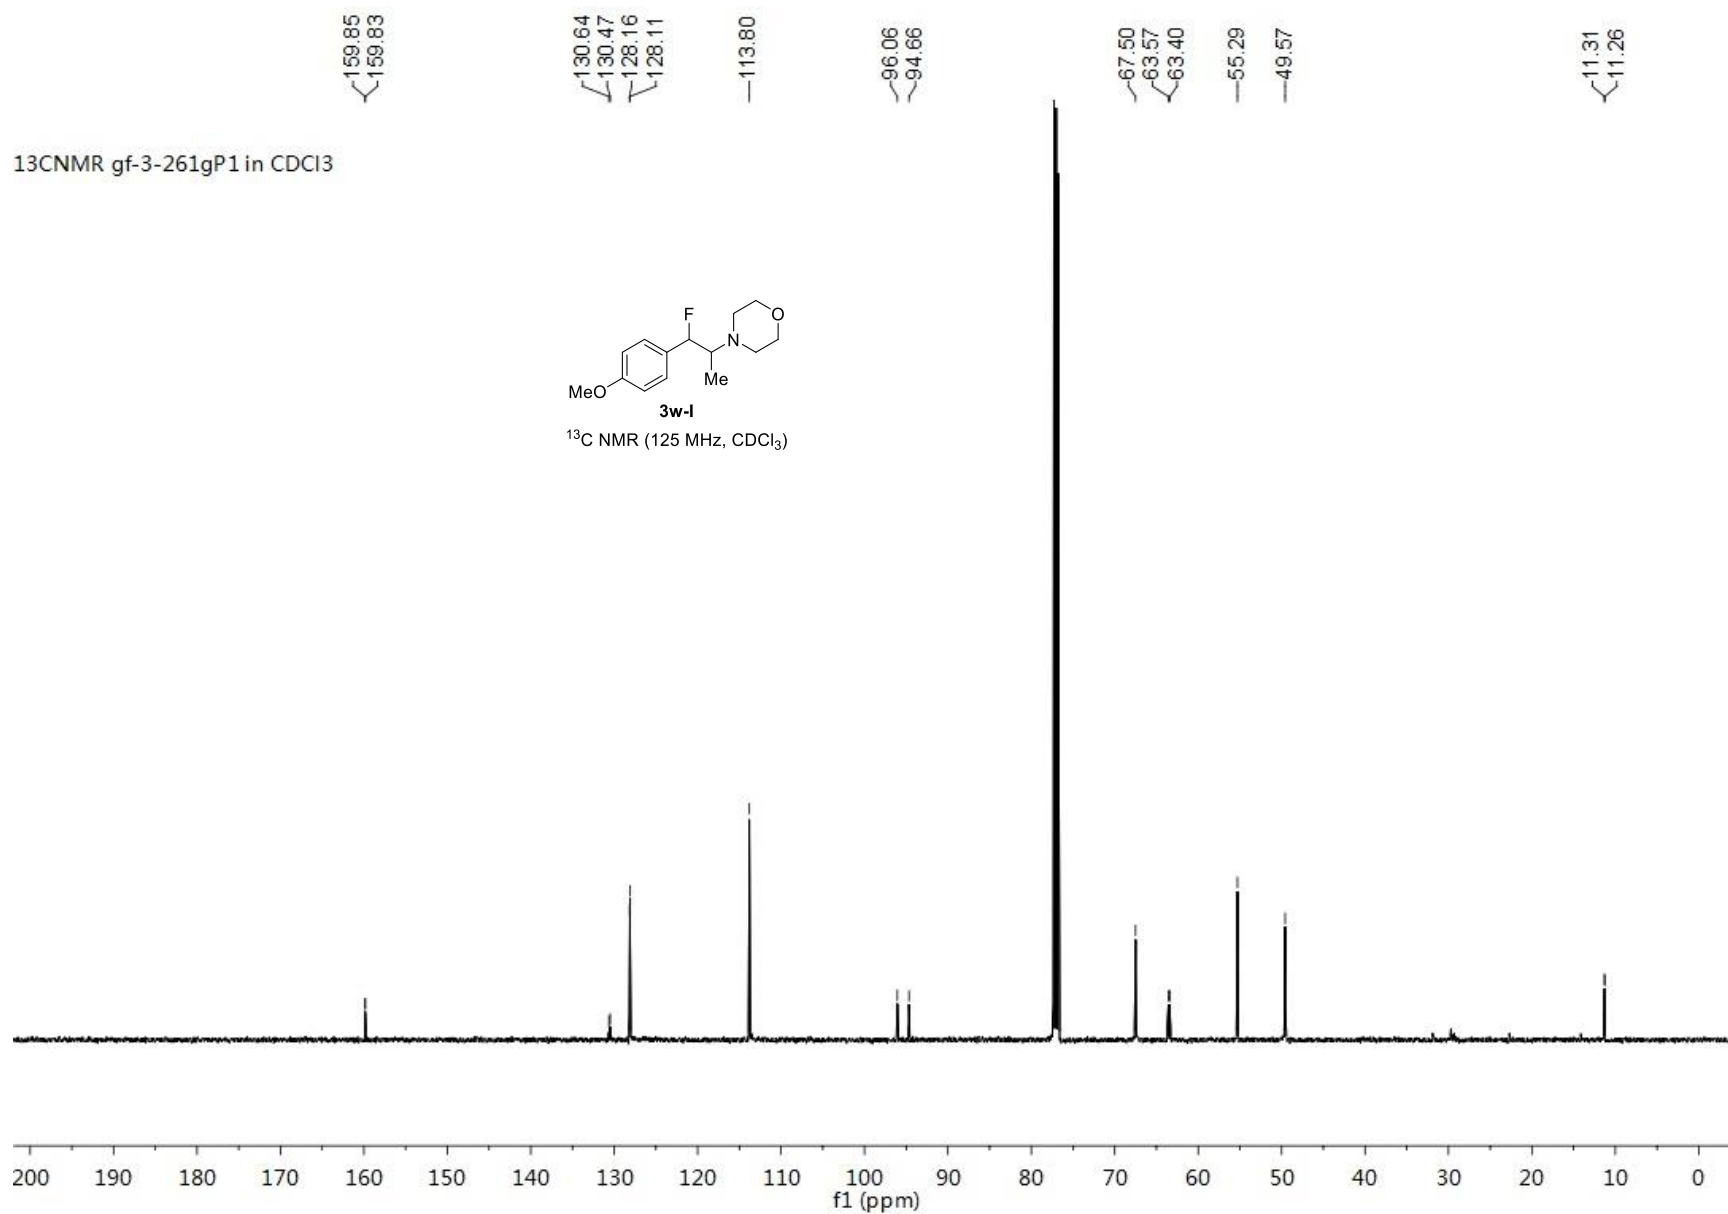

<sup>19</sup>F NMR gf-3-261gP1 in CDCl<sub>3</sub>

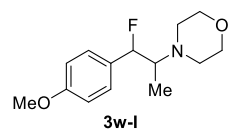

<sup>19</sup>F NMR (471 MHz, CDCl<sub>3</sub>)

---170.9617

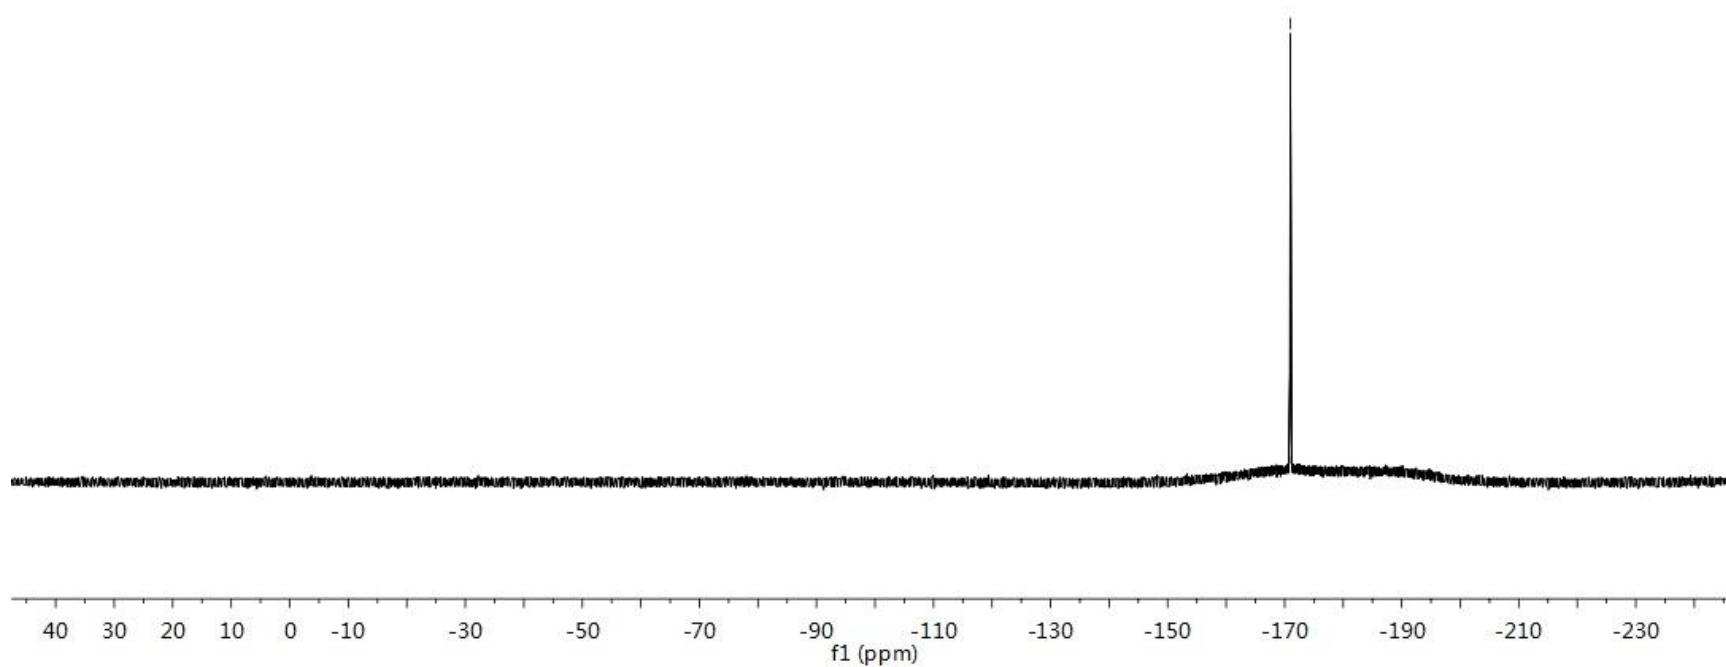

7.2603  
7.2297  
7.2128  
6.9023  
6.8853

5.6887  
5.5942

3.8136  
3.7532  
3.6919  
3.6662  
2.8737  
2.8432  
2.8343  
2.7910  
2.7821  
2.7496  
2.7161  
2.7050  
2.6632  
2.6359  
2.6142  
2.5729

1.0643  
1.0511

<sup>1</sup>H NMR of **3w-II** in CDCl<sub>3</sub>

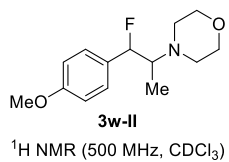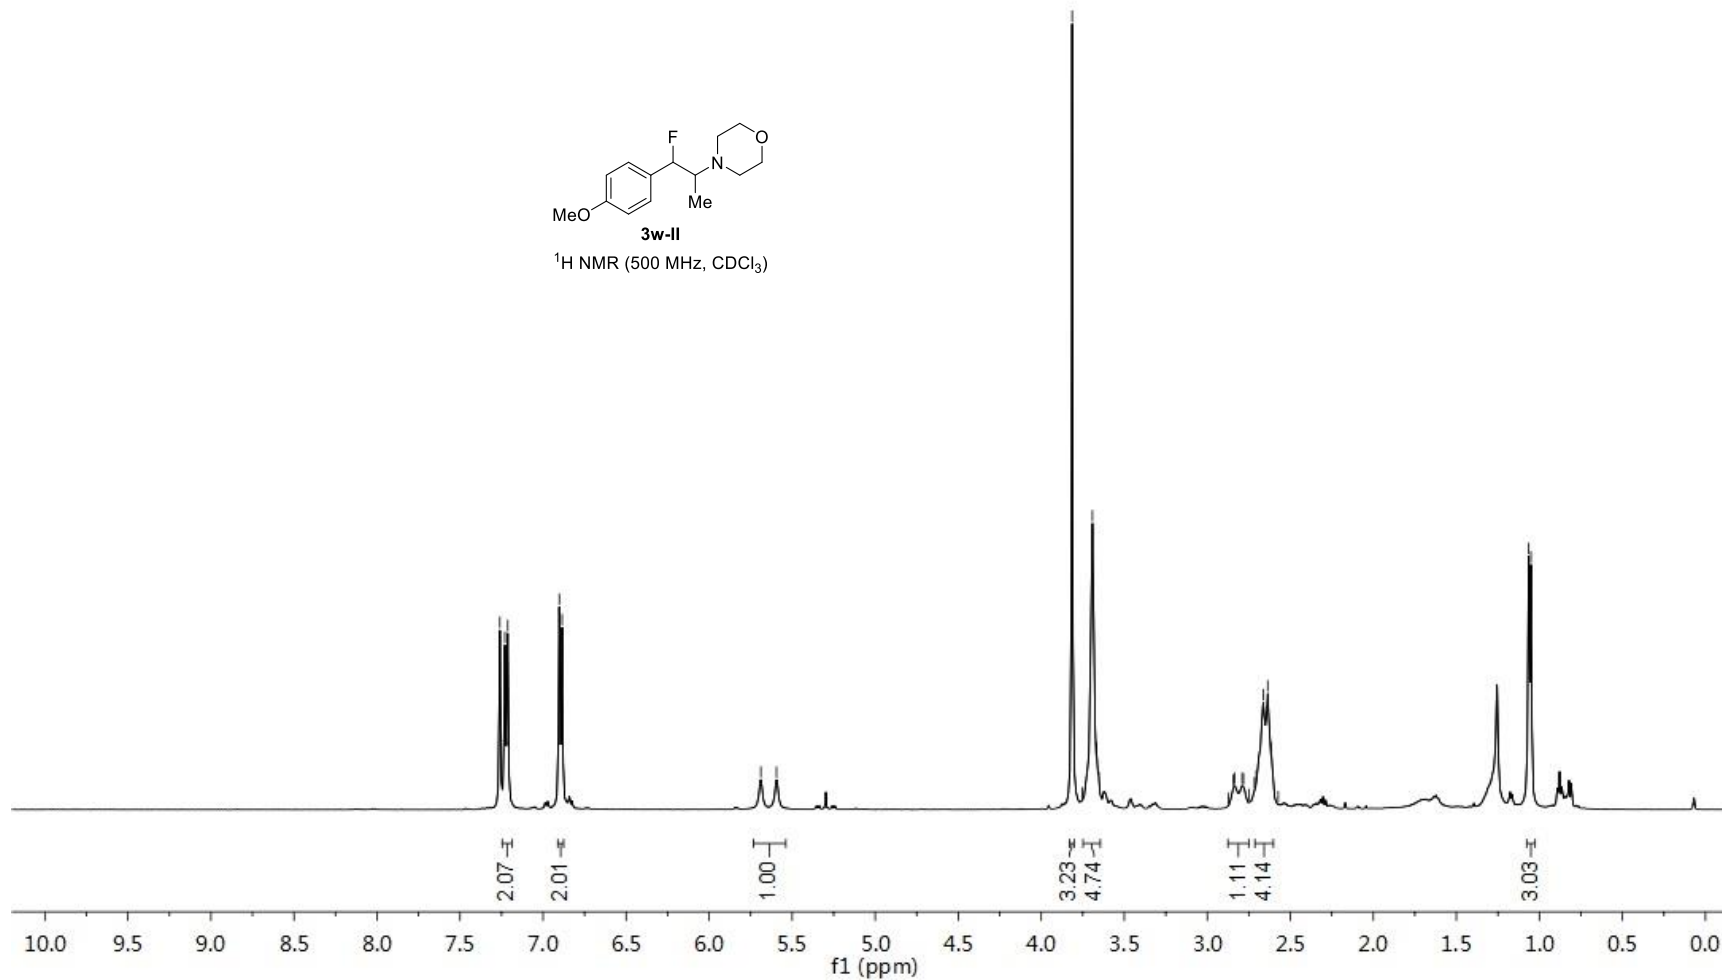

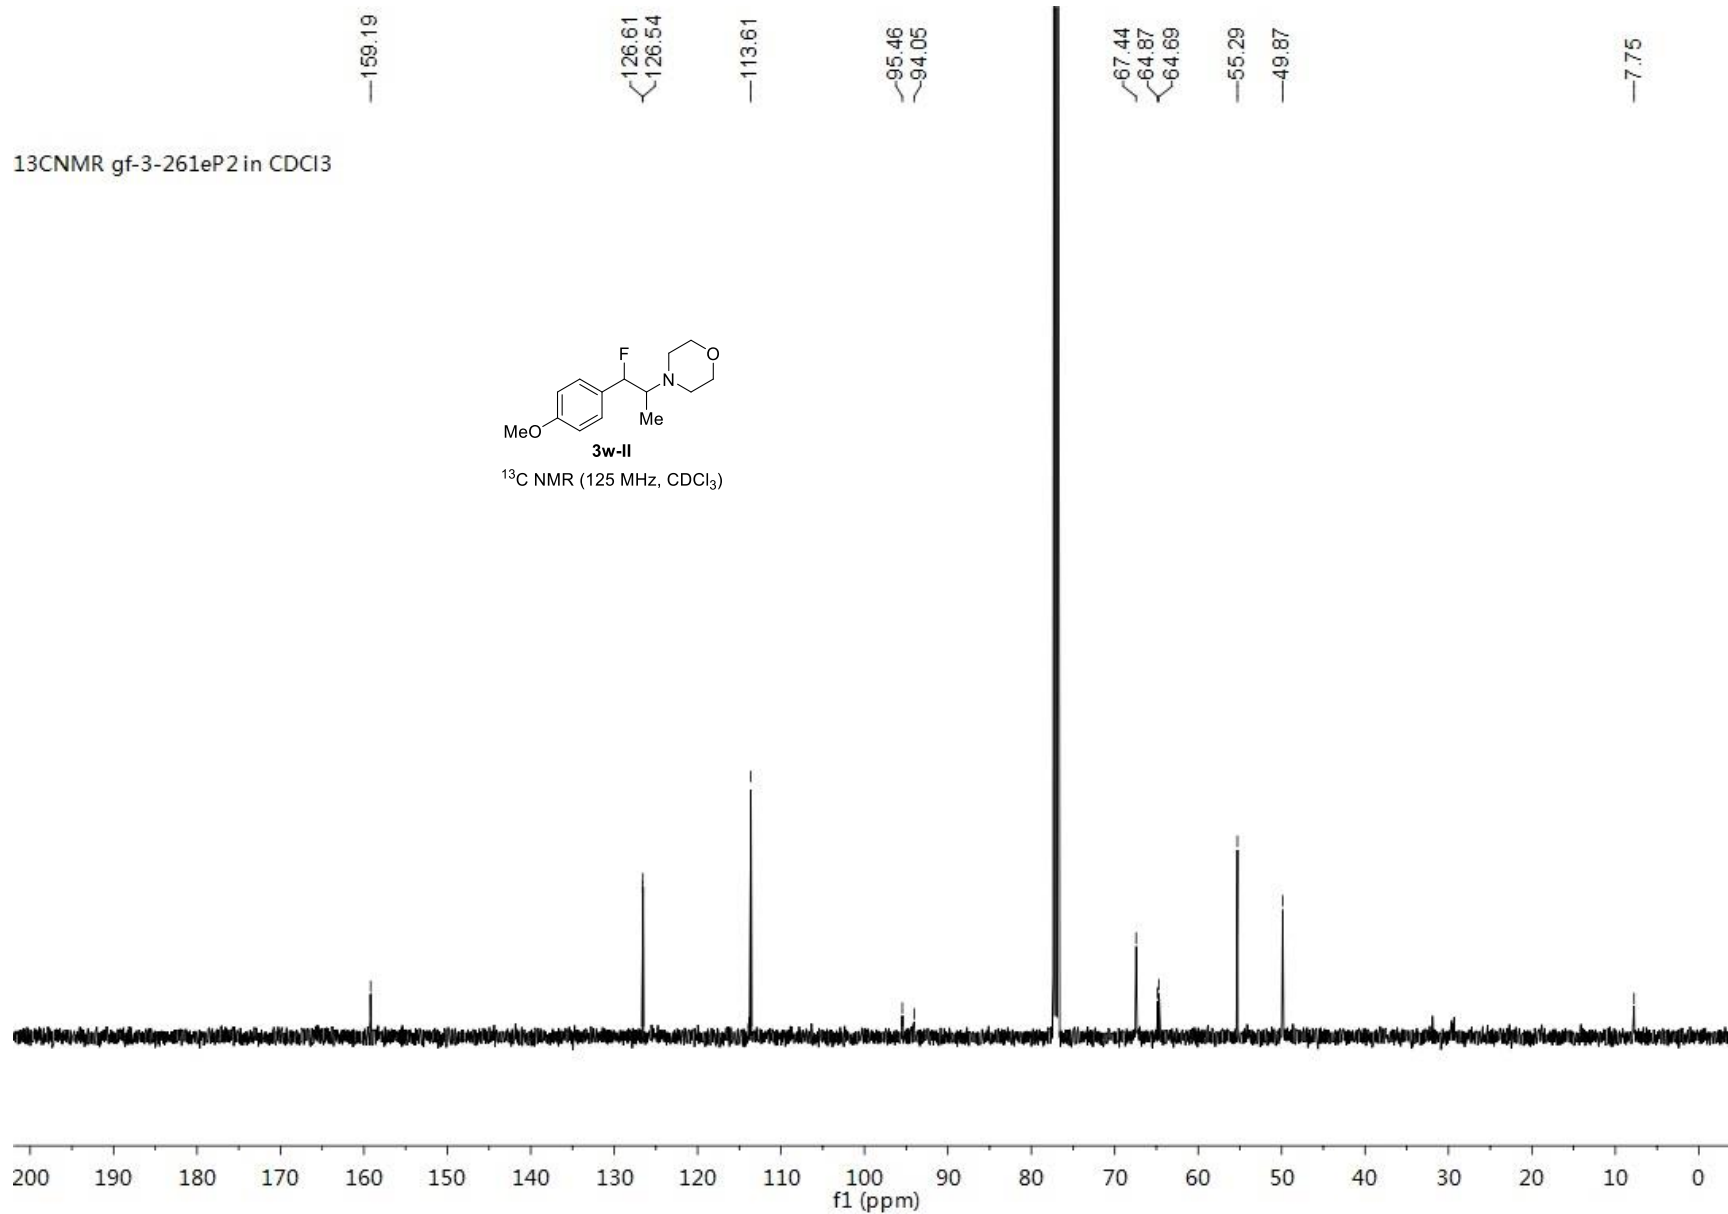

<sup>19</sup>F NMR of compound 3w-II in CDCl<sub>3</sub>

— 189.8105

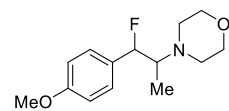

**3w-II**  
<sup>19</sup>F NMR (471 MHz, CDCl<sub>3</sub>)

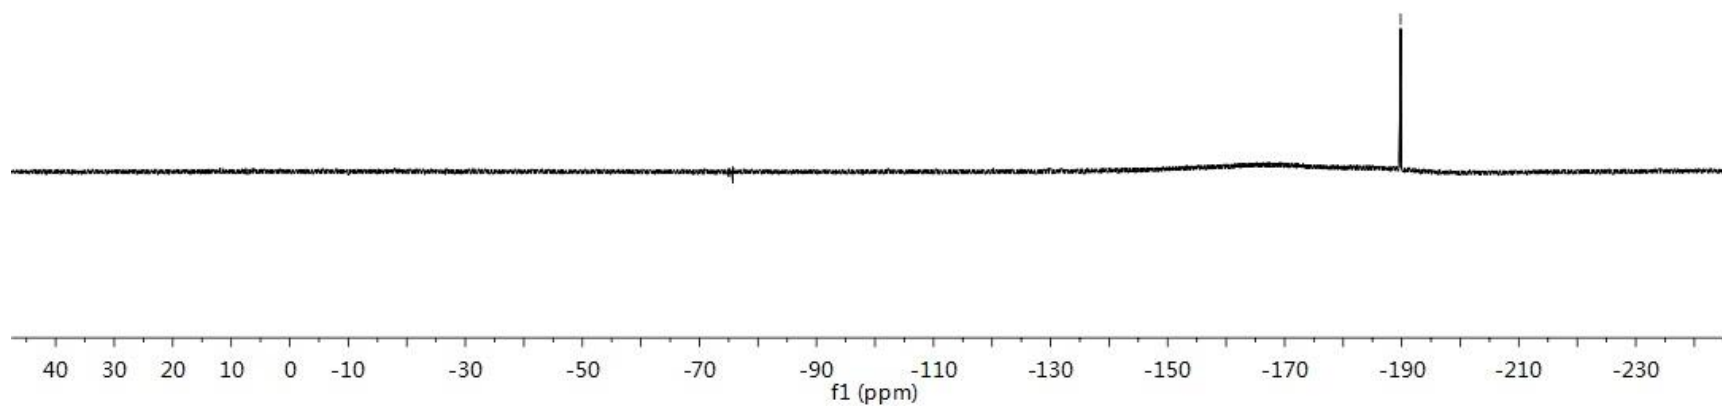

7.4147  
7.4006  
7.3279  
7.3134  
7.2989  
7.2949  
7.2920  
7.2777  
7.2598  
7.2231  
7.2087  
6.0649  
6.0536  
5.9494  
5.9386  
3.7951  
3.7858  
3.7763  
3.2133  
3.2072  
3.1959  
2.8363  
2.8243  
2.8116  
2.7896  
2.7162  
2.6431  
2.6341  
2.6240  
2.6113  
2.6022

<sup>1</sup>H NMR gf-3-68cP col in CDCl<sub>3</sub>

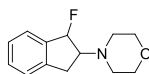

**3x**  
<sup>1</sup>H NMR (500 MHz, CDCl<sub>3</sub>)  
major diastereomer  
w/ trace minor diastereomer

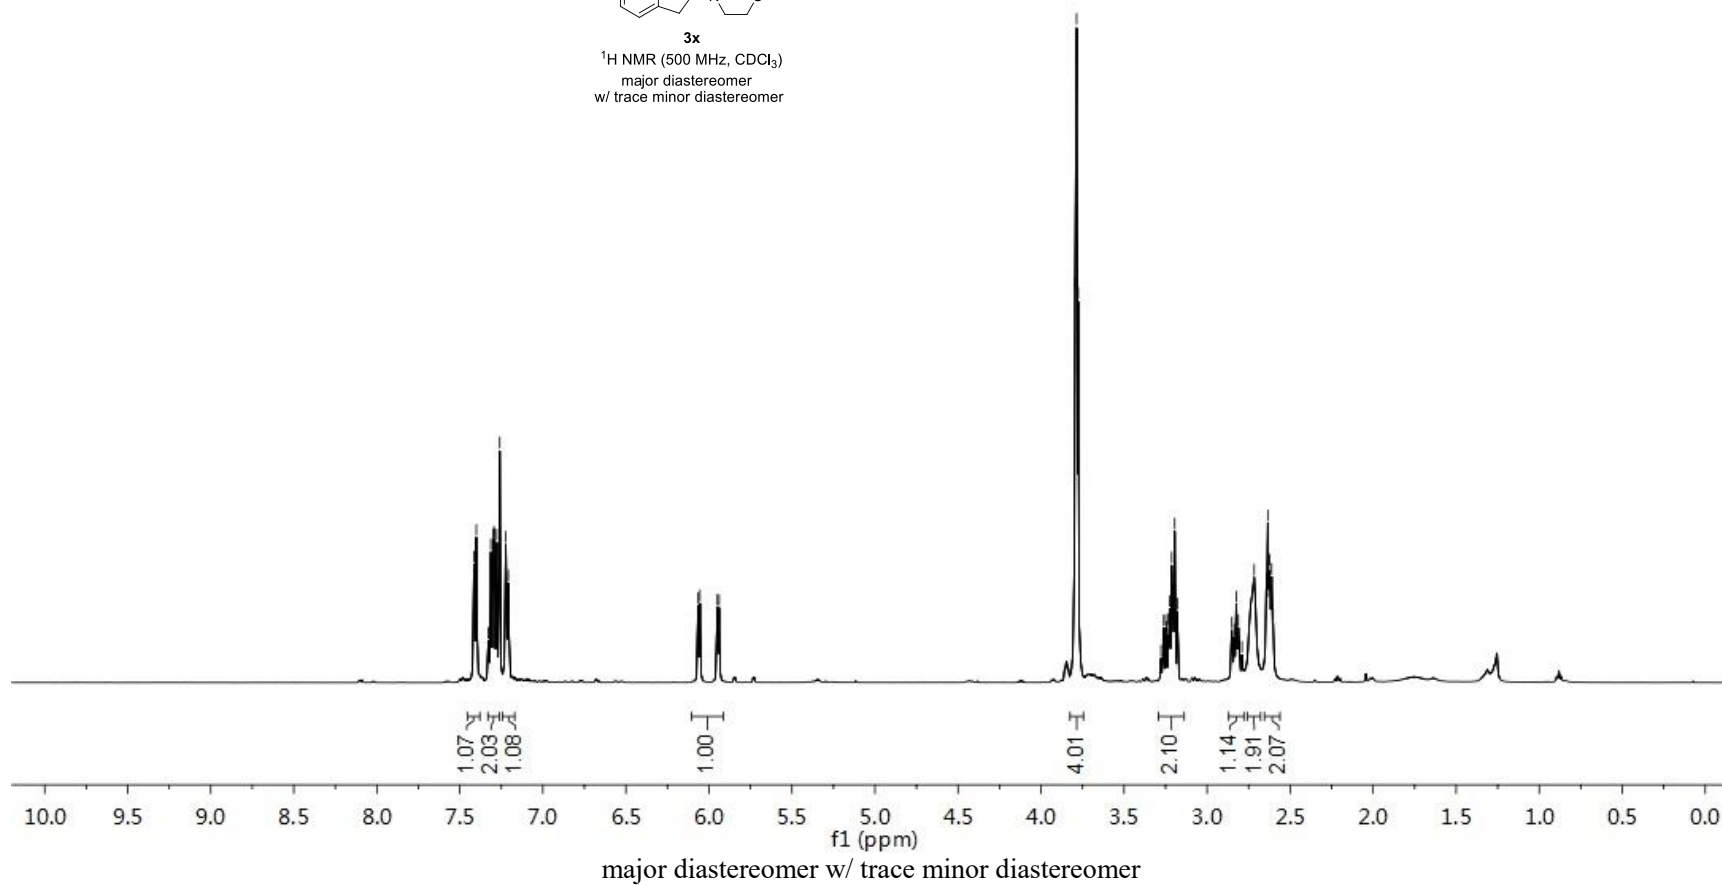

<sup>13</sup>CNMR gf-3-68cP col in CDCL<sub>3</sub>

139.53  
139.49  
139.11  
138.94  
129.43  
129.41  
127.28  
127.27  
124.82  
124.64

99.71  
98.28

73.36  
73.22  
66.89

52.42

34.21  
34.17

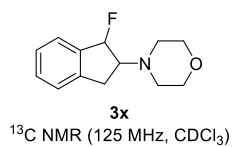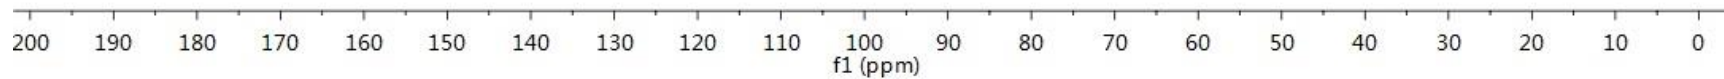



<sup>19</sup>F NMR gf-3-68cP col in CDCl<sub>3</sub>

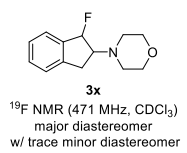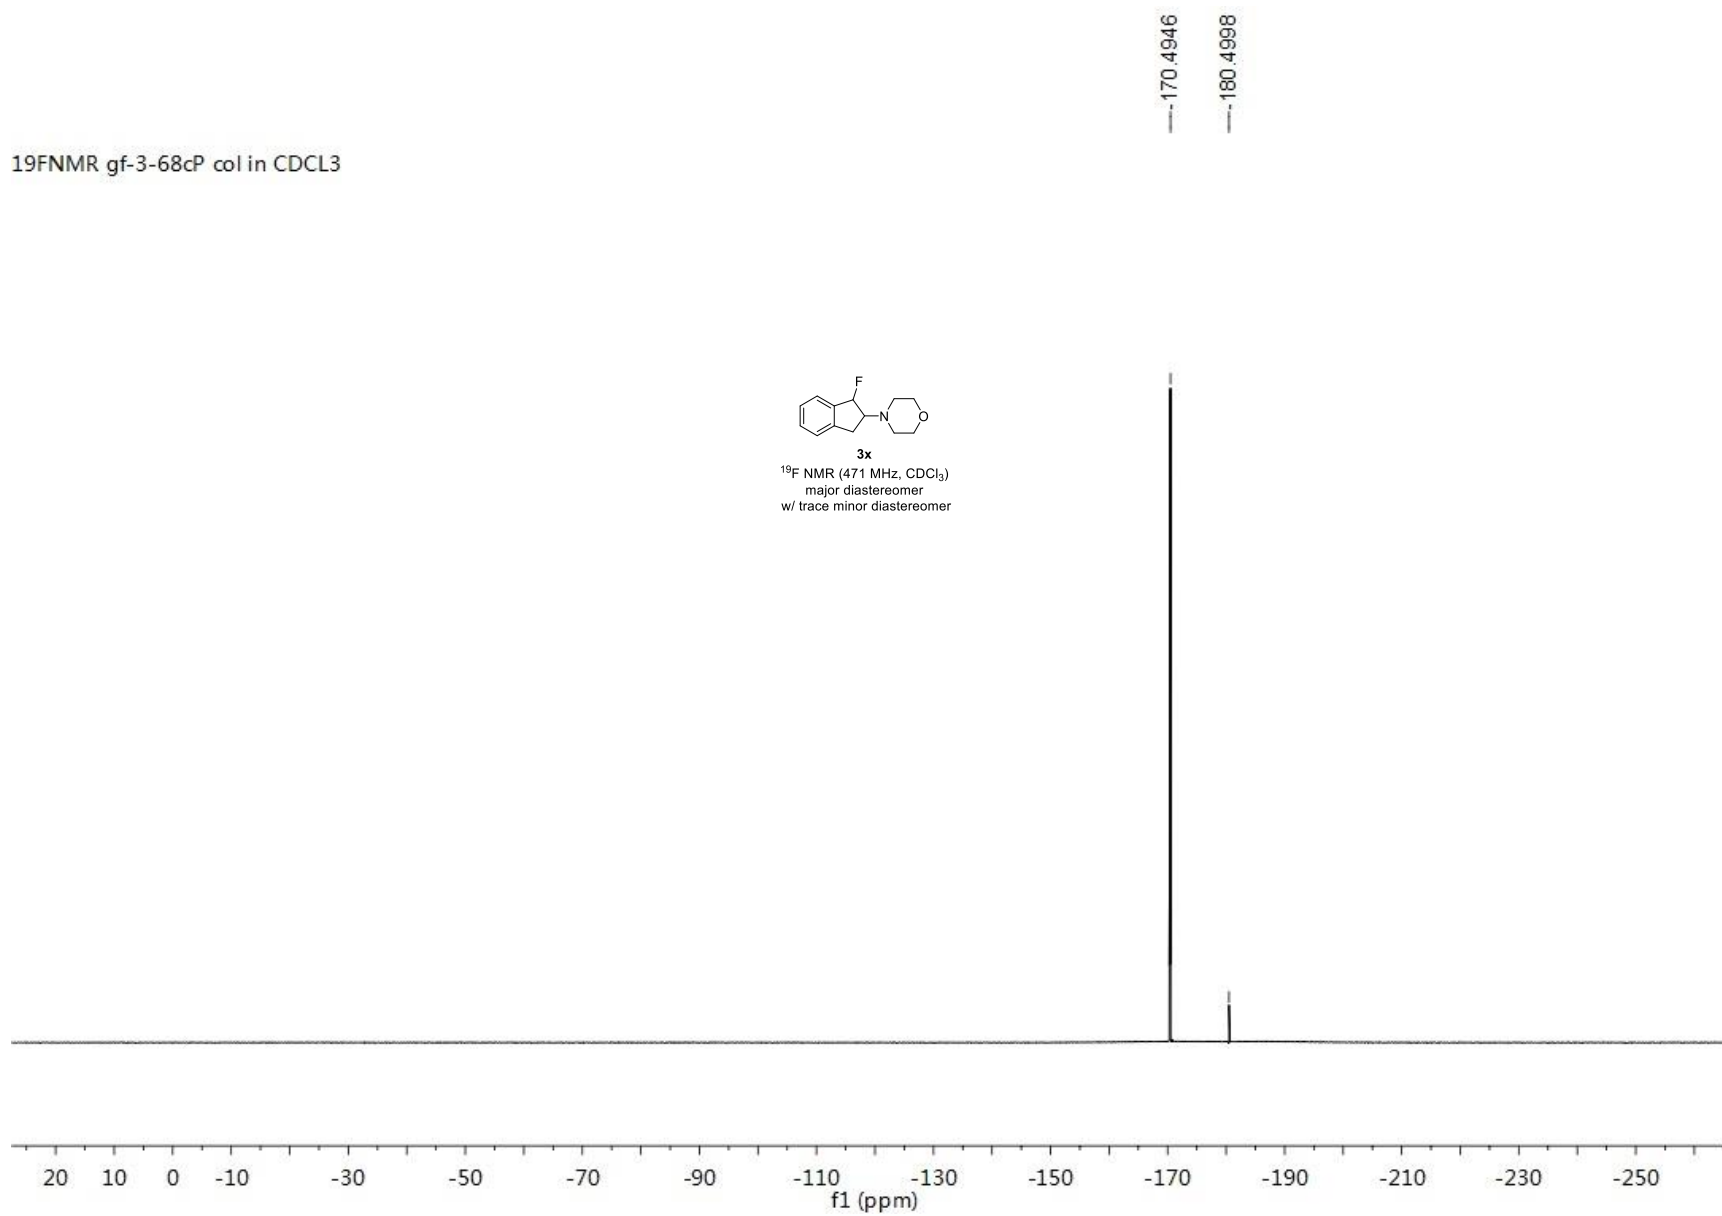

<sup>1</sup>H NMR of compound 3y in CDCl<sub>3</sub>

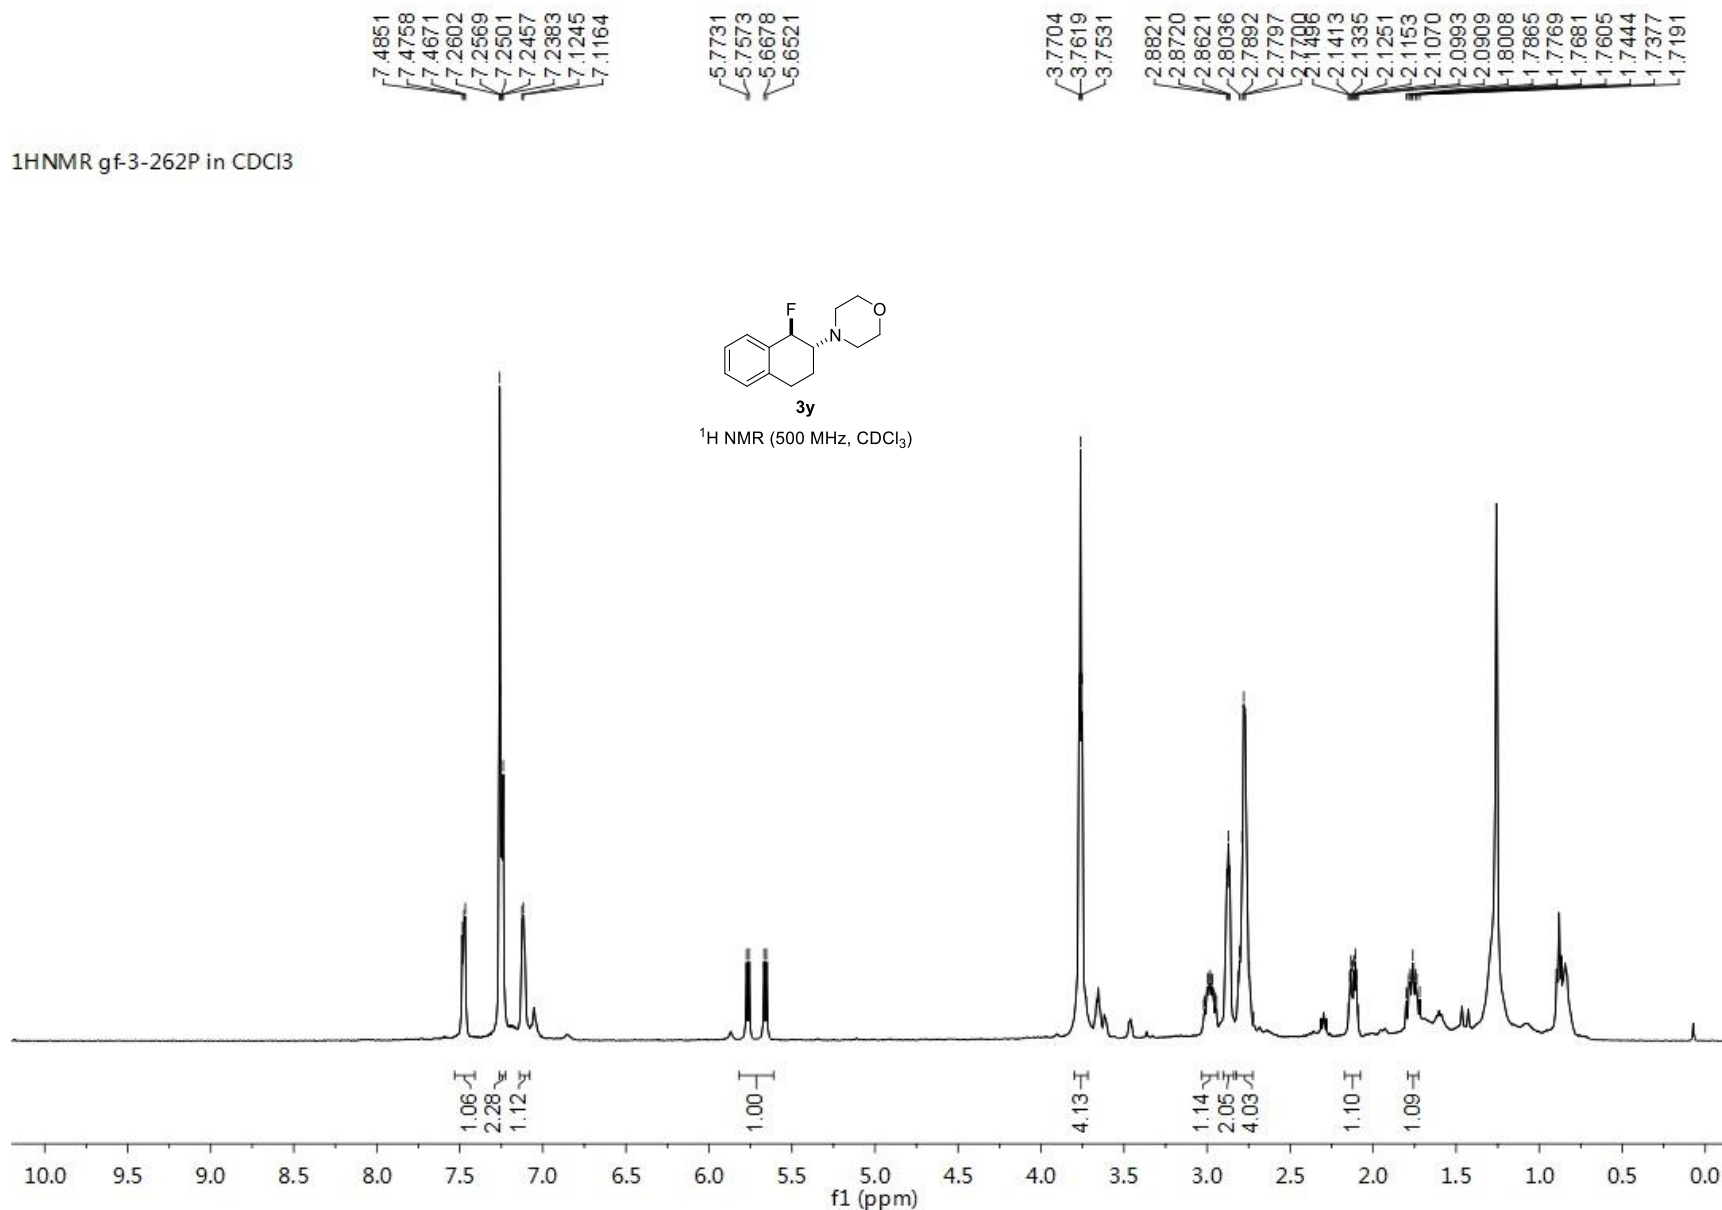

<sup>13</sup>C NMR gf-3-262PP in CDCl<sub>3</sub>

137.02  
136.99  
134.50  
134.36  
128.44  
128.43  
128.40  
128.19  
126.45

90.46  
89.08

67.31  
65.15  
65.01

50.12

28.46  
23.37  
23.32

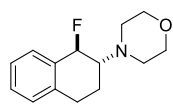

**3y**

<sup>13</sup>C NMR (125 MHz, CDCl<sub>3</sub>)

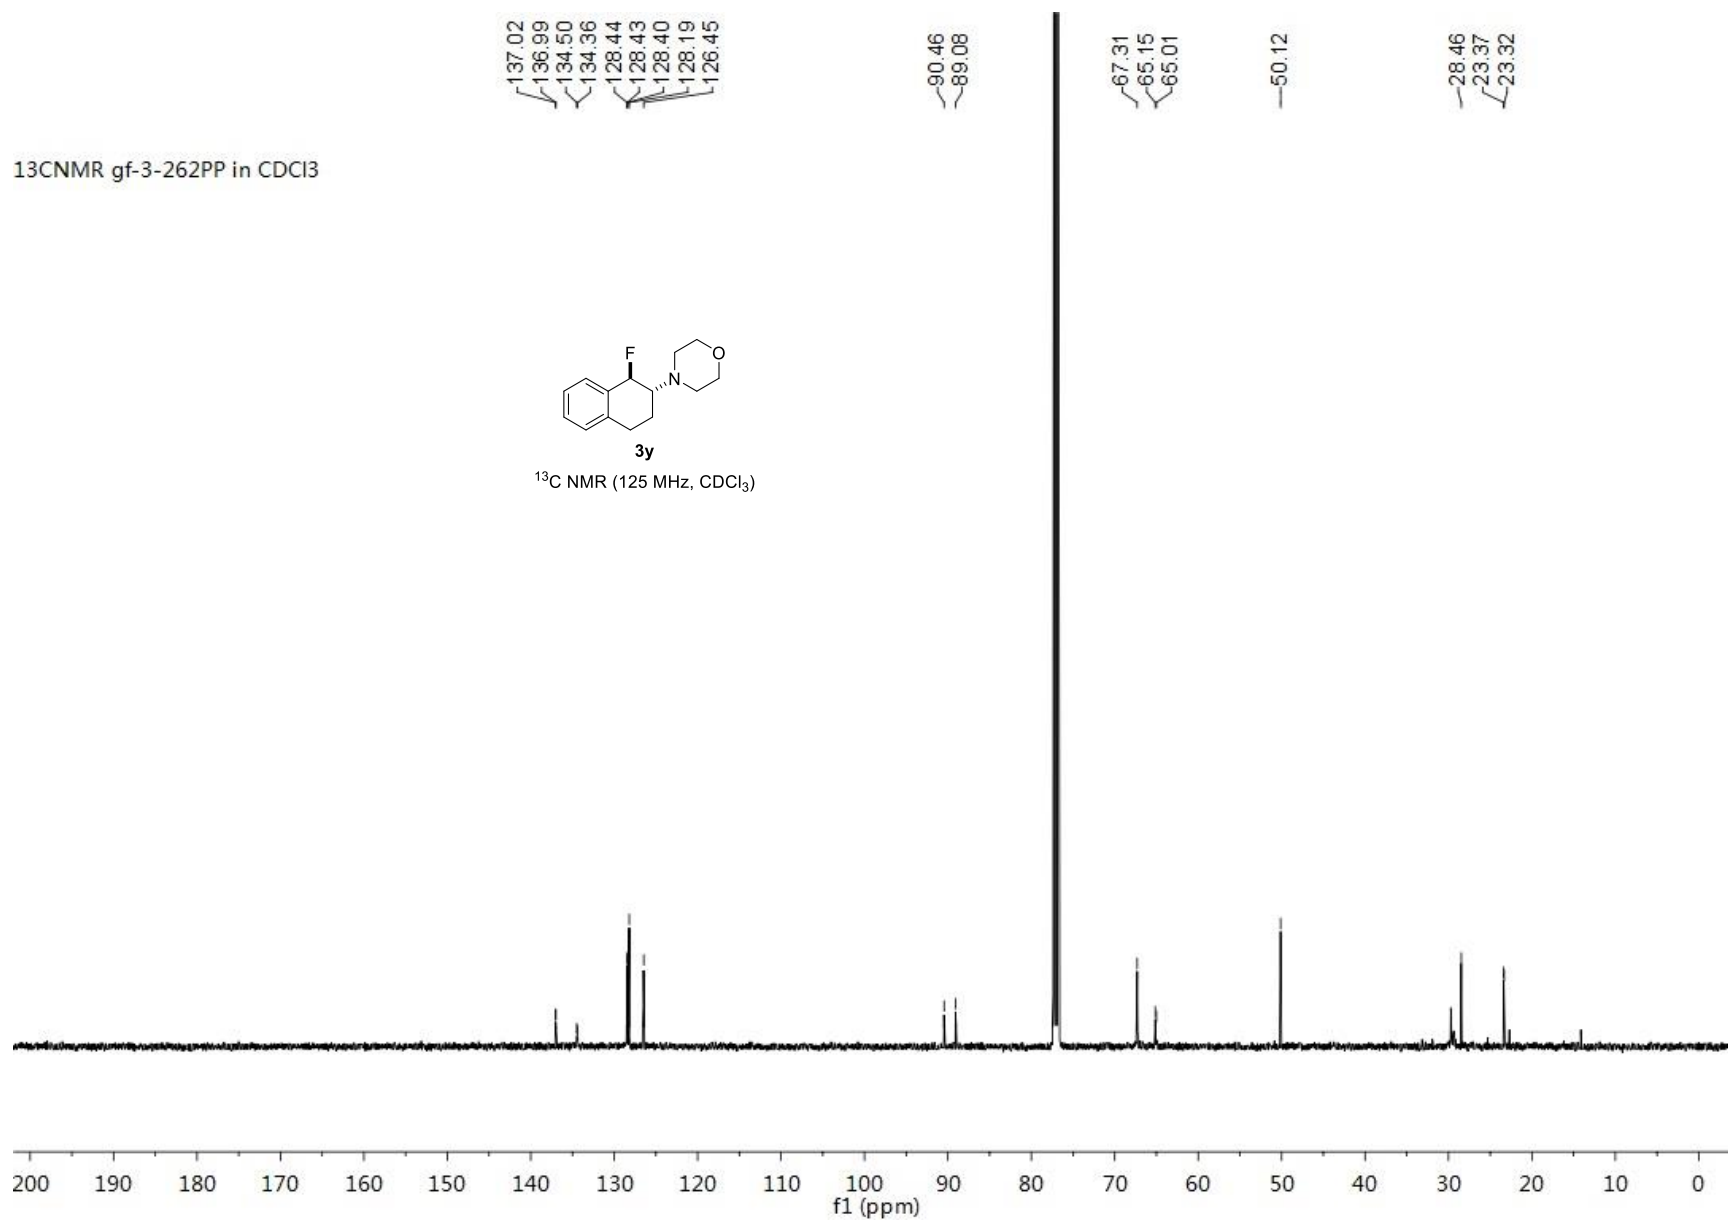

<sup>19</sup>F NMR gf-3-262aP in CDCl<sub>3</sub>

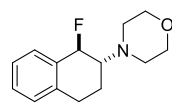

<sup>19</sup>F NMR (471 MHz, CDCl<sub>3</sub>)

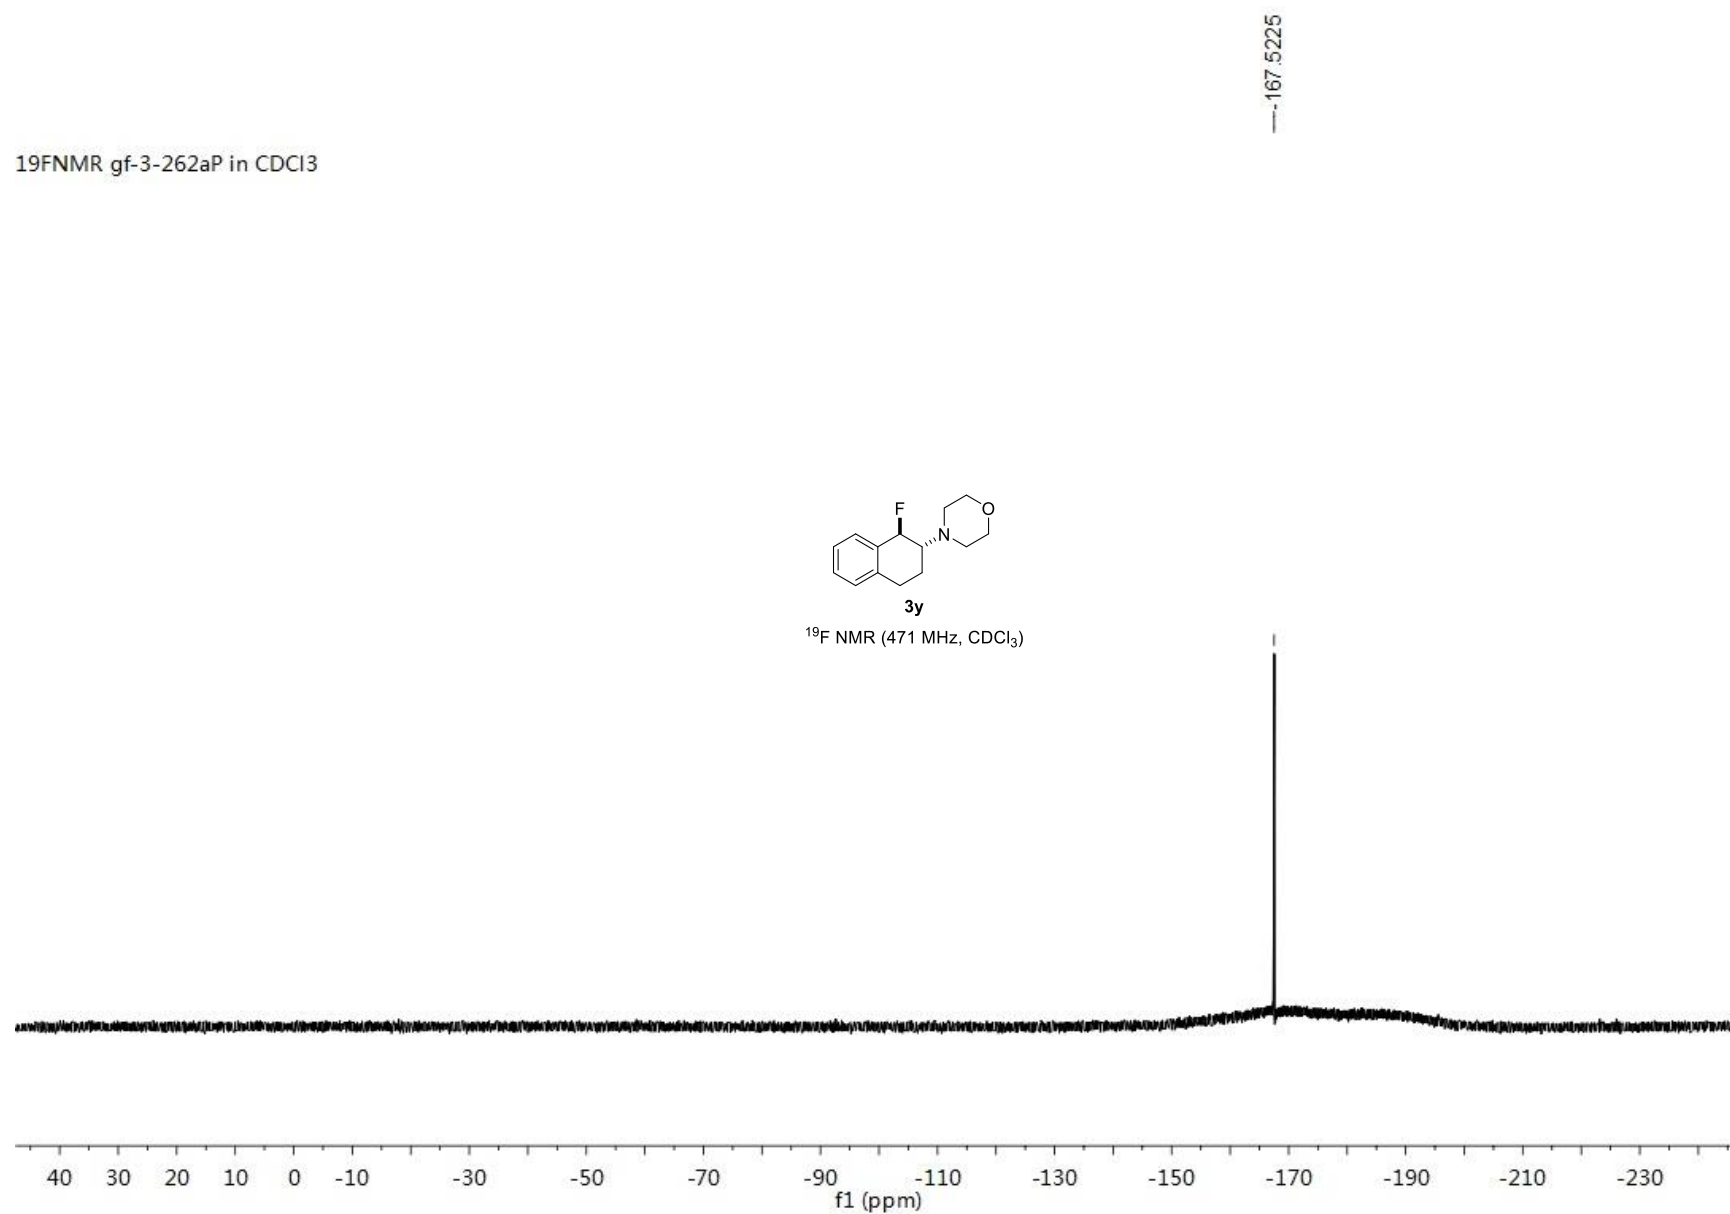

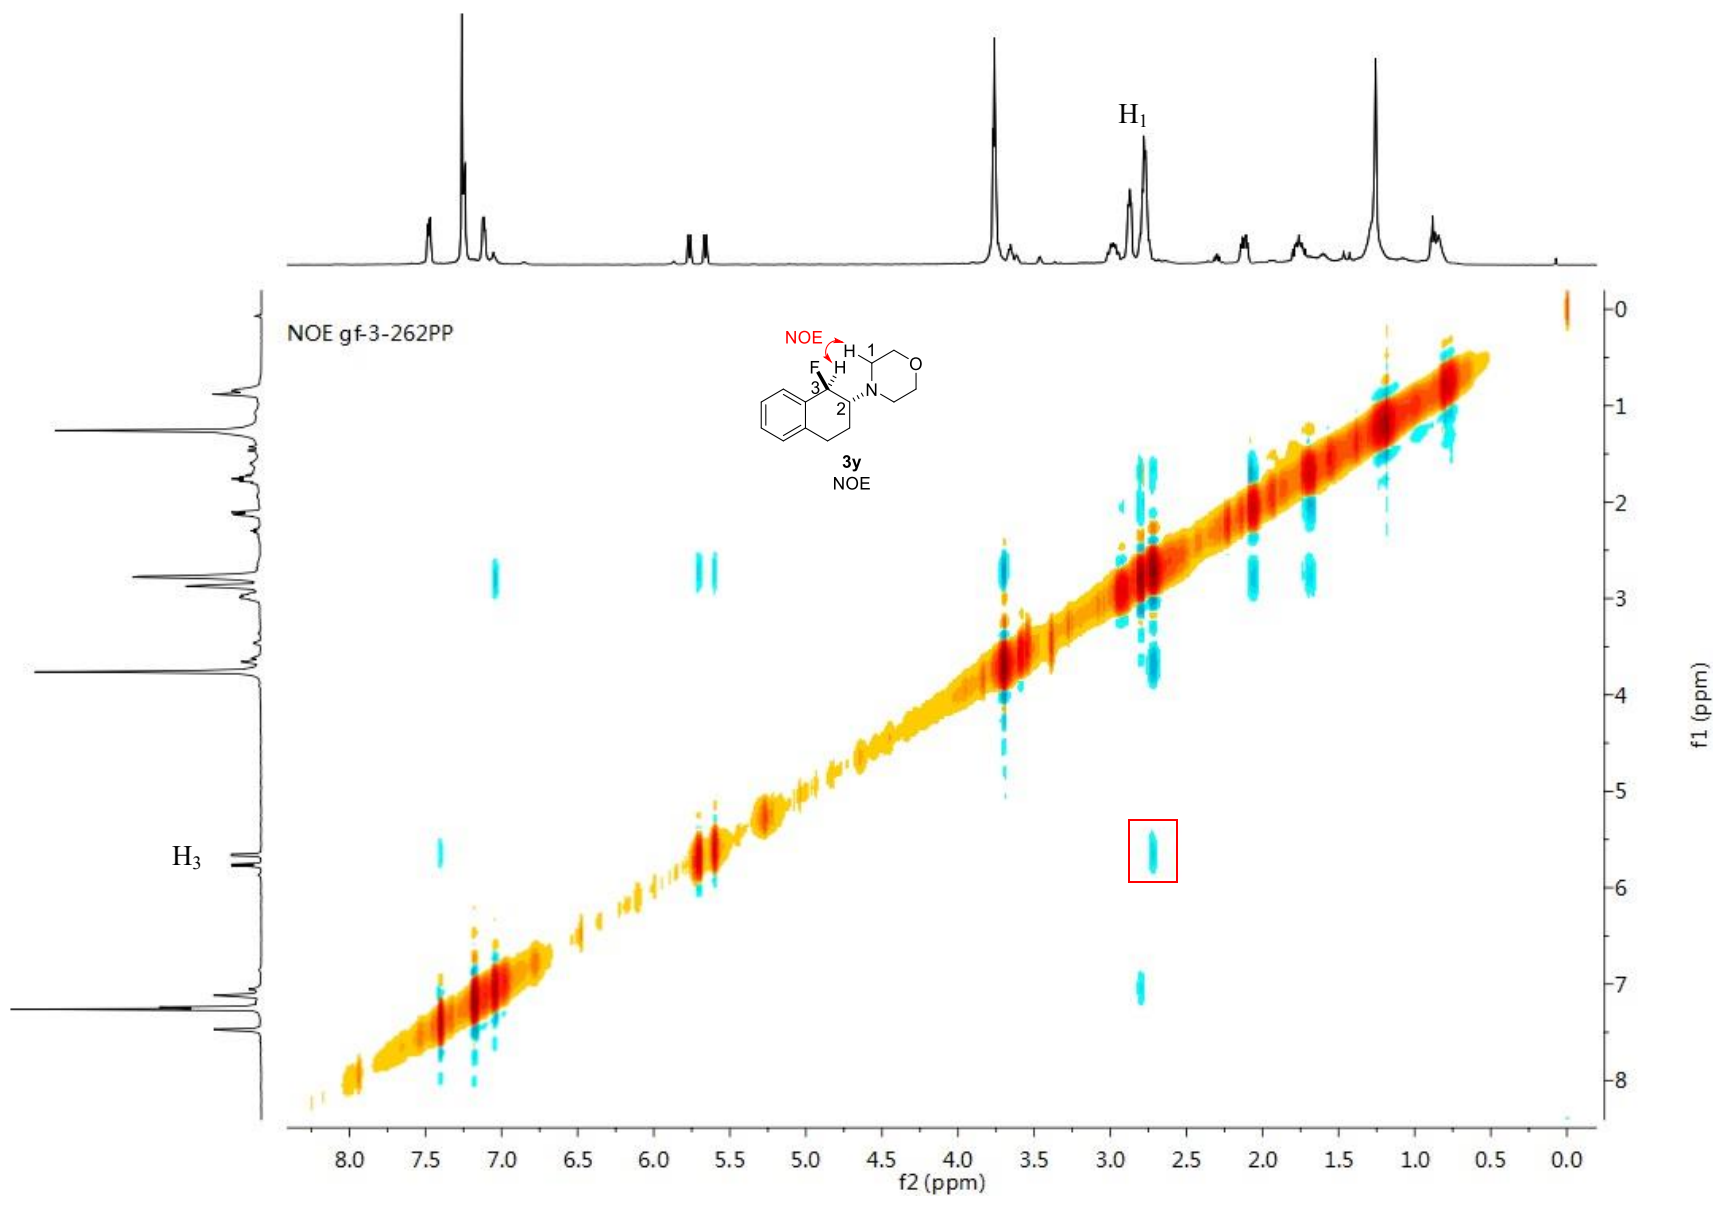

<sup>1</sup>H NMR of compound 3z in CDCl<sub>3</sub>

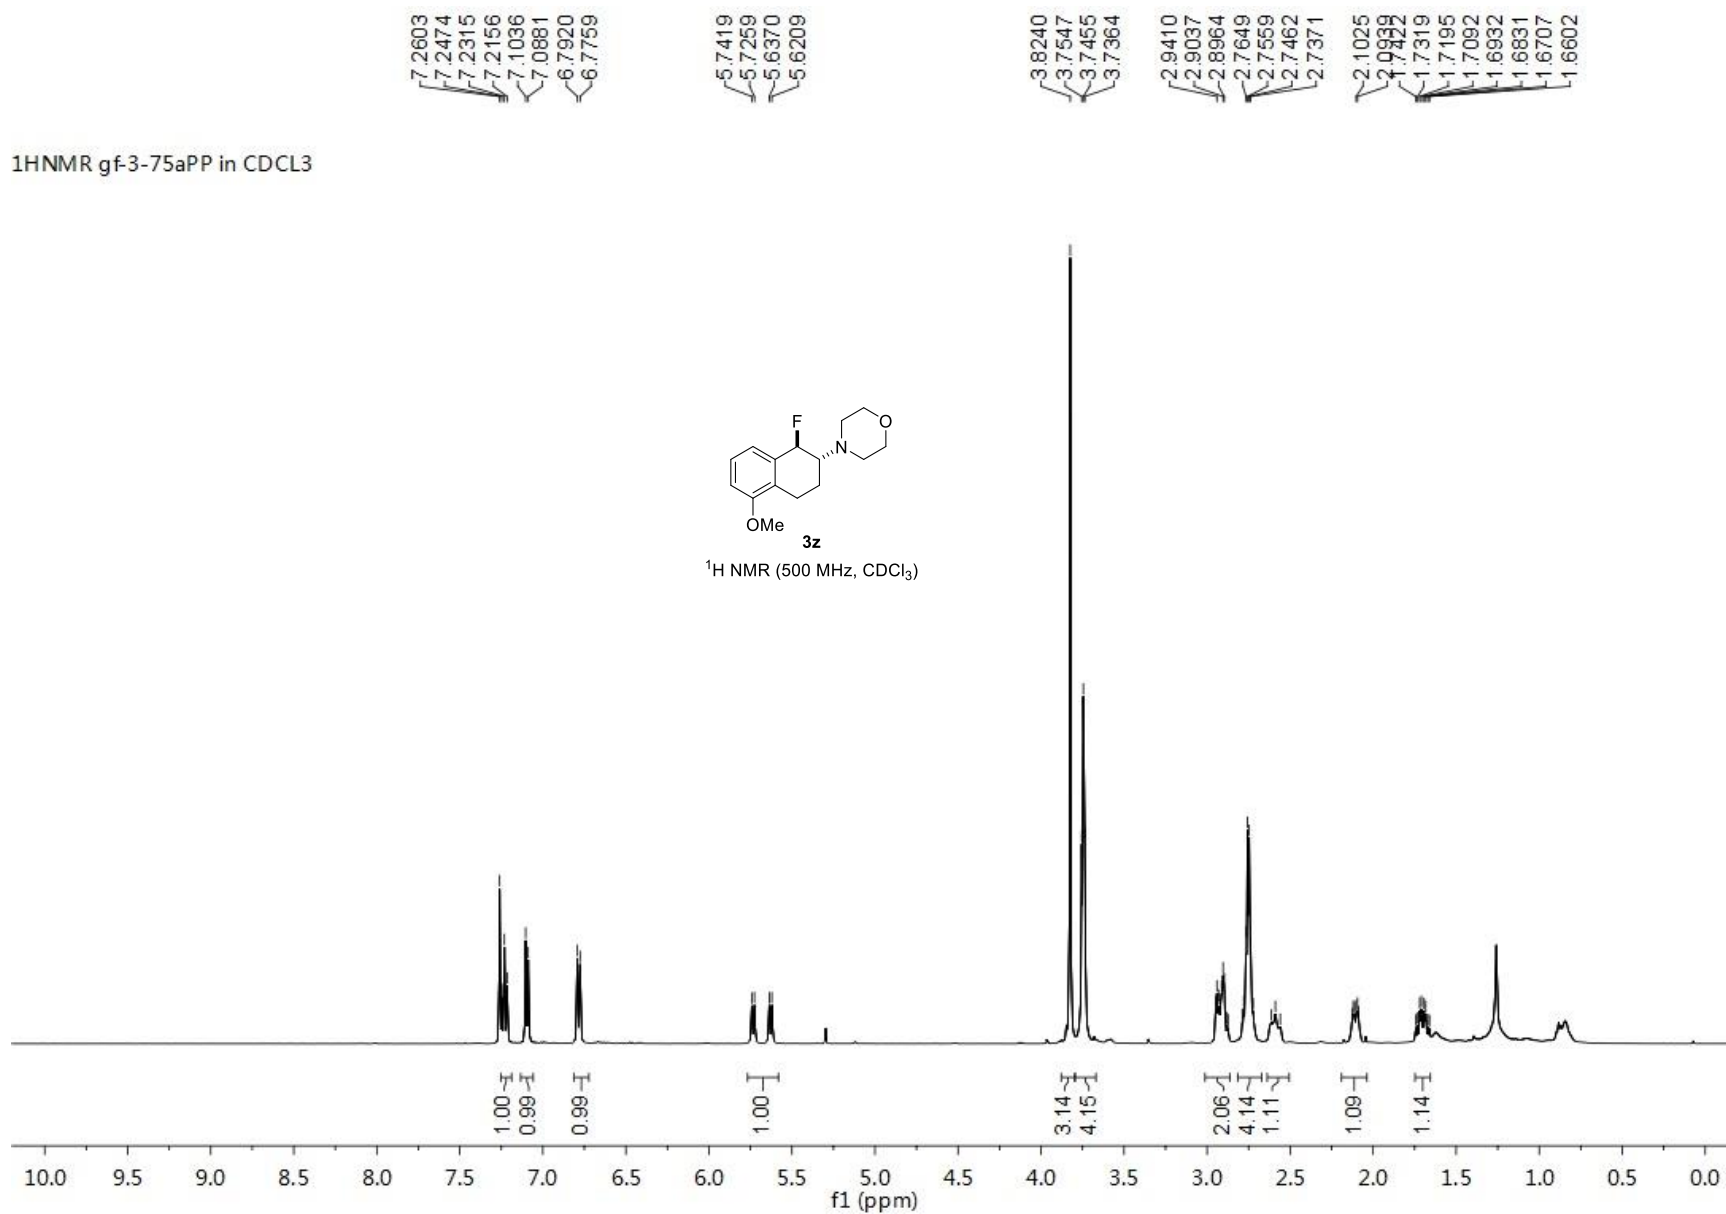

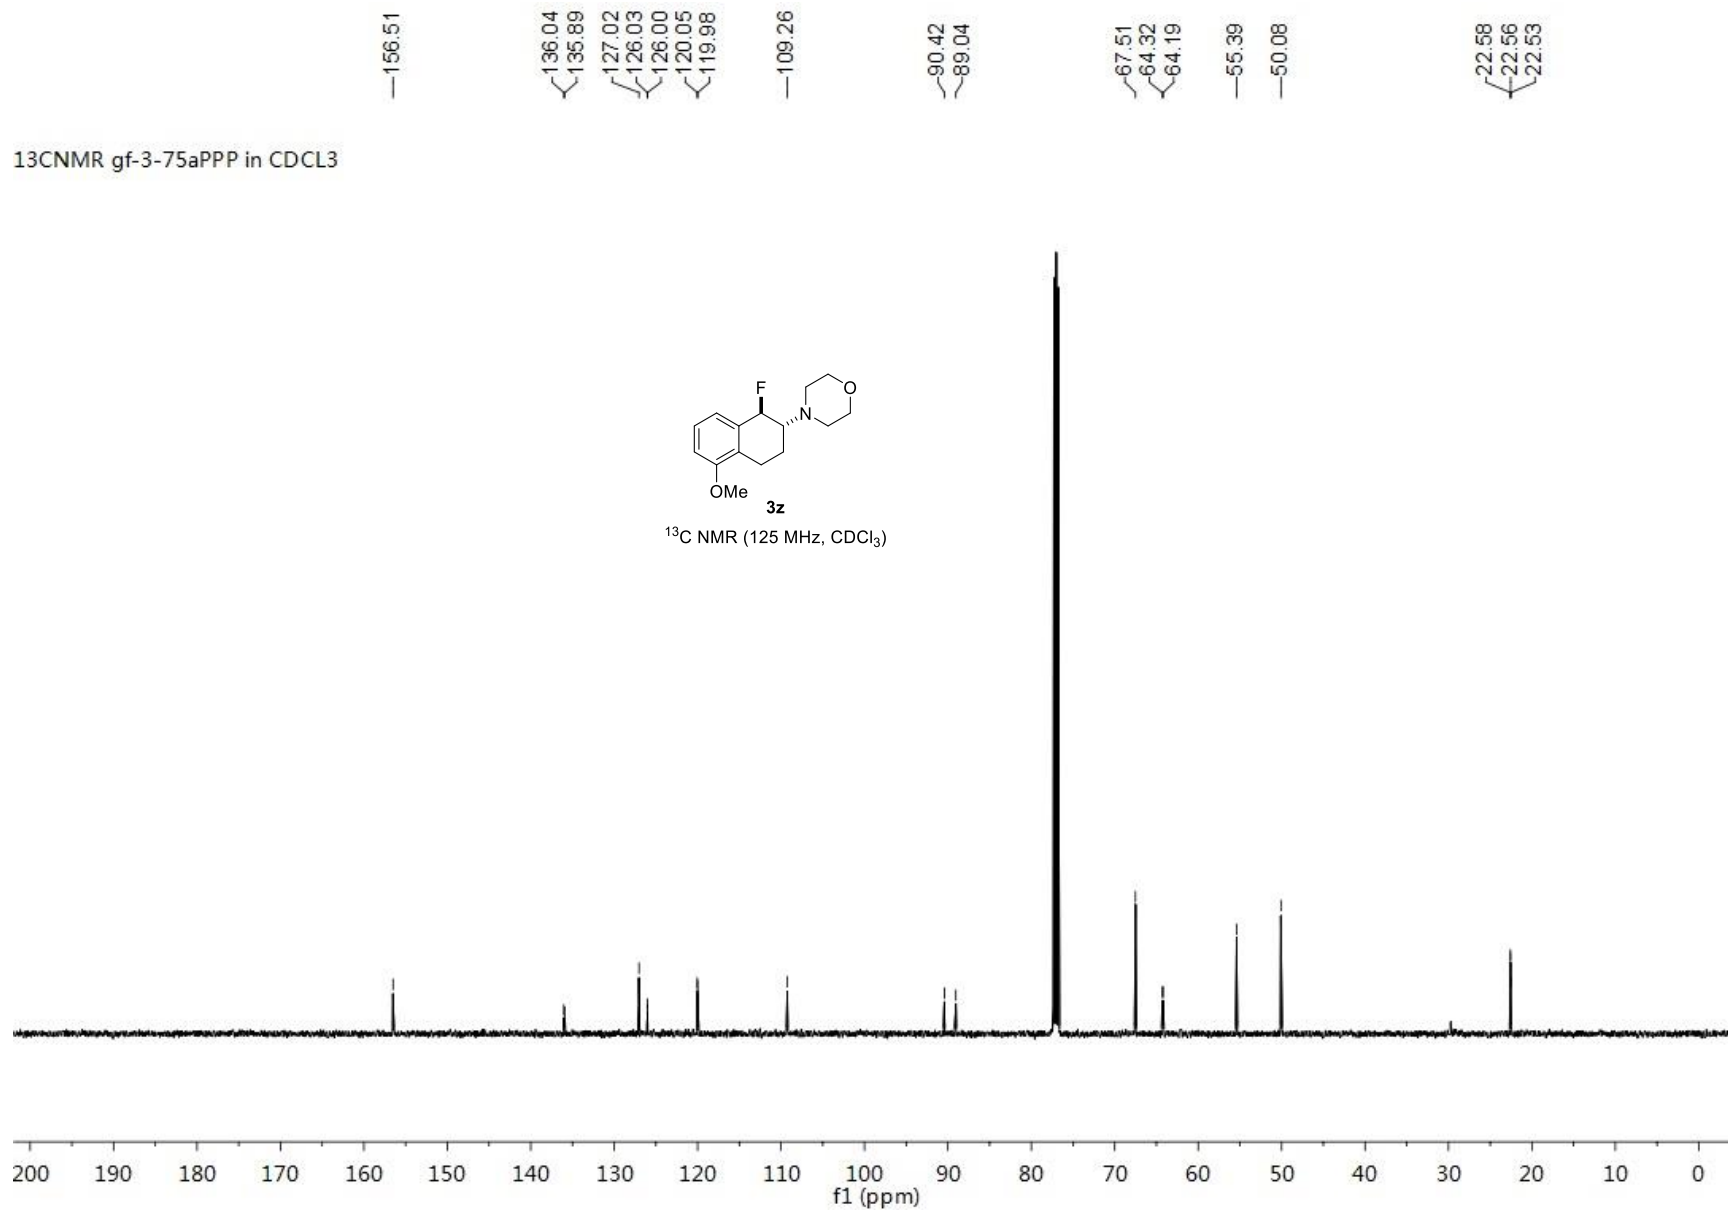

<sup>19</sup>F NMR gf-3-75aPPP in CDCl<sub>3</sub>

168.6082

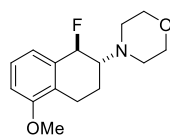

<sup>19</sup>F NMR (471 MHz, CDCl<sub>3</sub>)

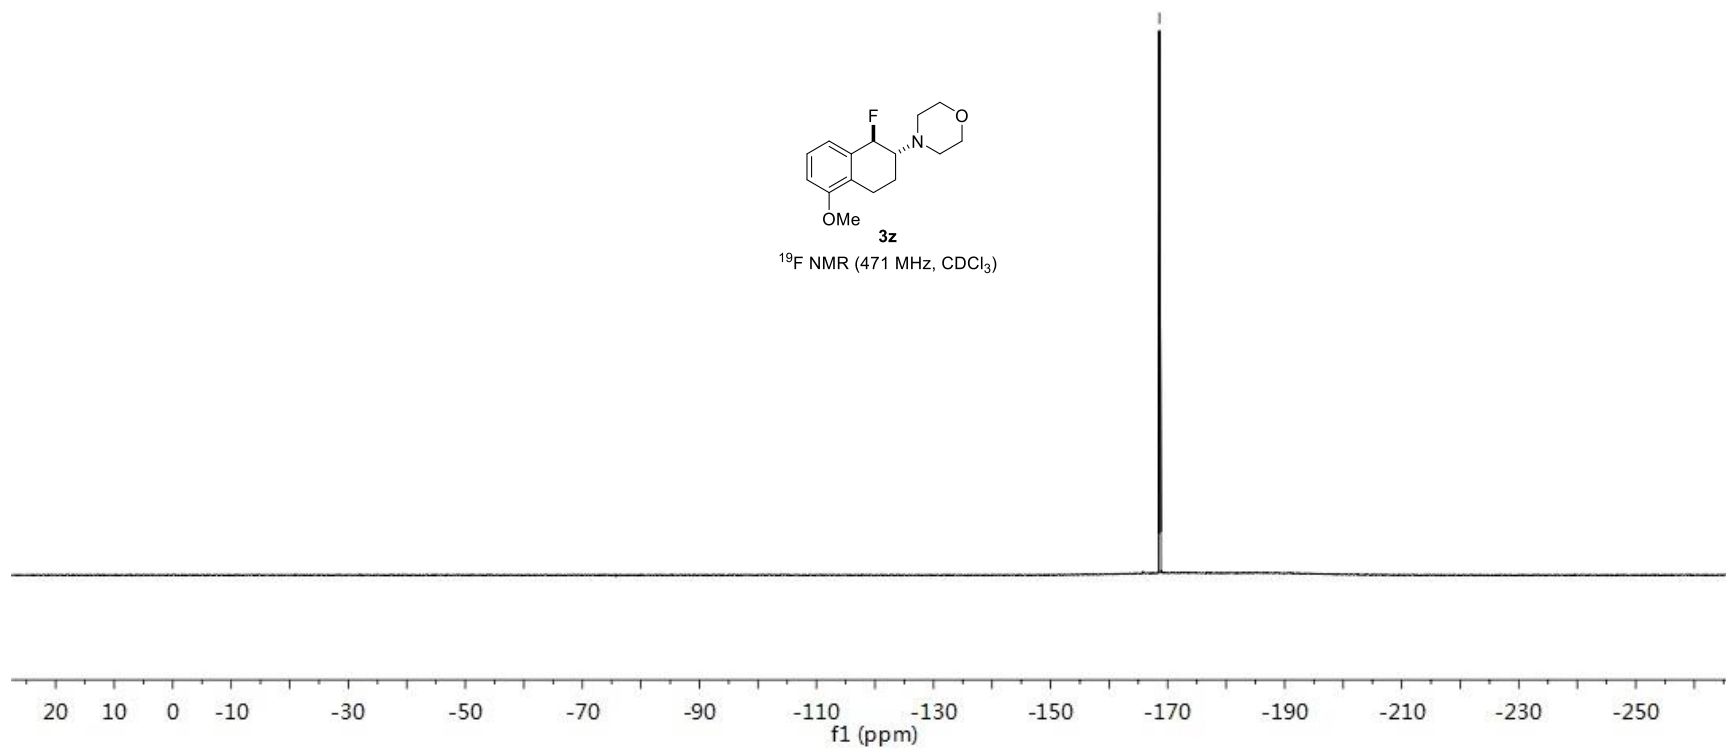



7.2384  
7.2226  
7.1819  
7.1660

5.6985  
5.6944  
5.6807  
5.6766  
5.6005  
5.5964  
5.5826  
5.5786

2.9319  
2.9140  
2.9033  
2.8972  
2.8854  
2.8793  
2.8686  
2.8507  
2.8320  
2.8273  
2.6033  
2.5987  
2.5612  
2.5566  
2.5330  
2.5283  
2.3507  
1.6520  
1.6401  
1.6296  
1.6192  
1.6079  
1.4745  
1.4627  
1.4514  
1.4401  
1.4288

<sup>1</sup>H NMR of gf-3-84aP in CDCl<sub>3</sub>

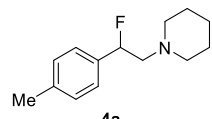

<sup>1</sup>H NMR (500 MHz, CDCl<sub>3</sub>)

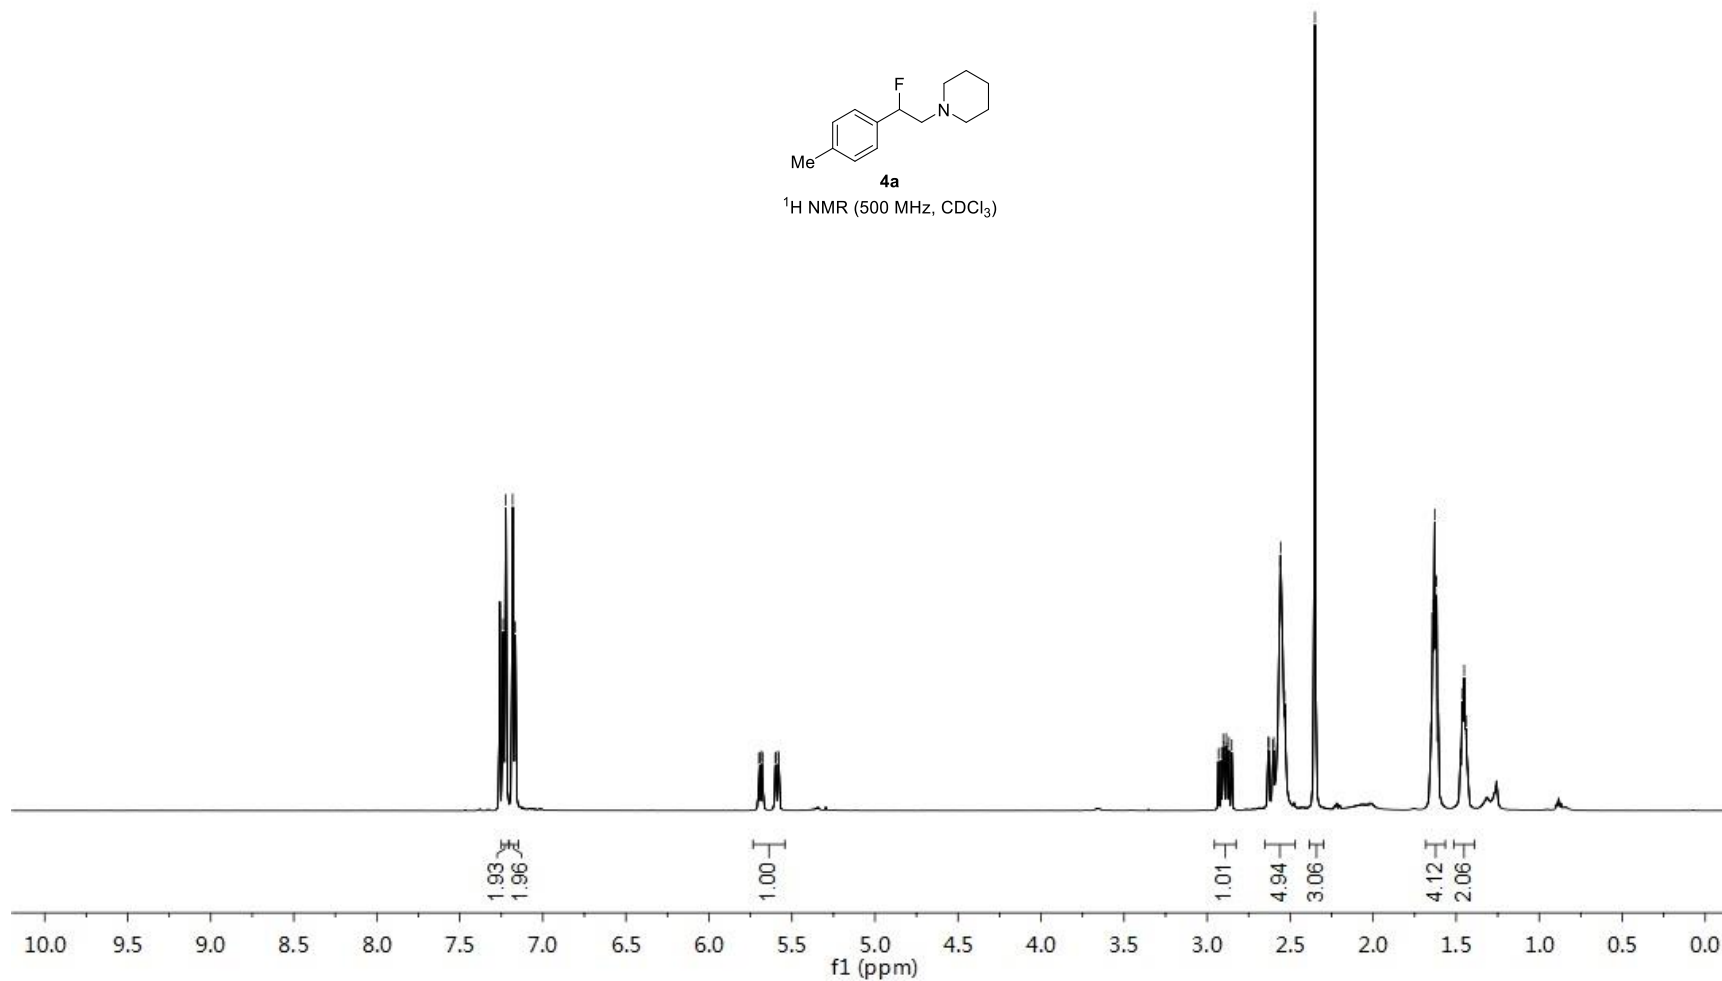

<sup>13</sup>CNMR gf-3-84aP in CDCl<sub>3</sub>

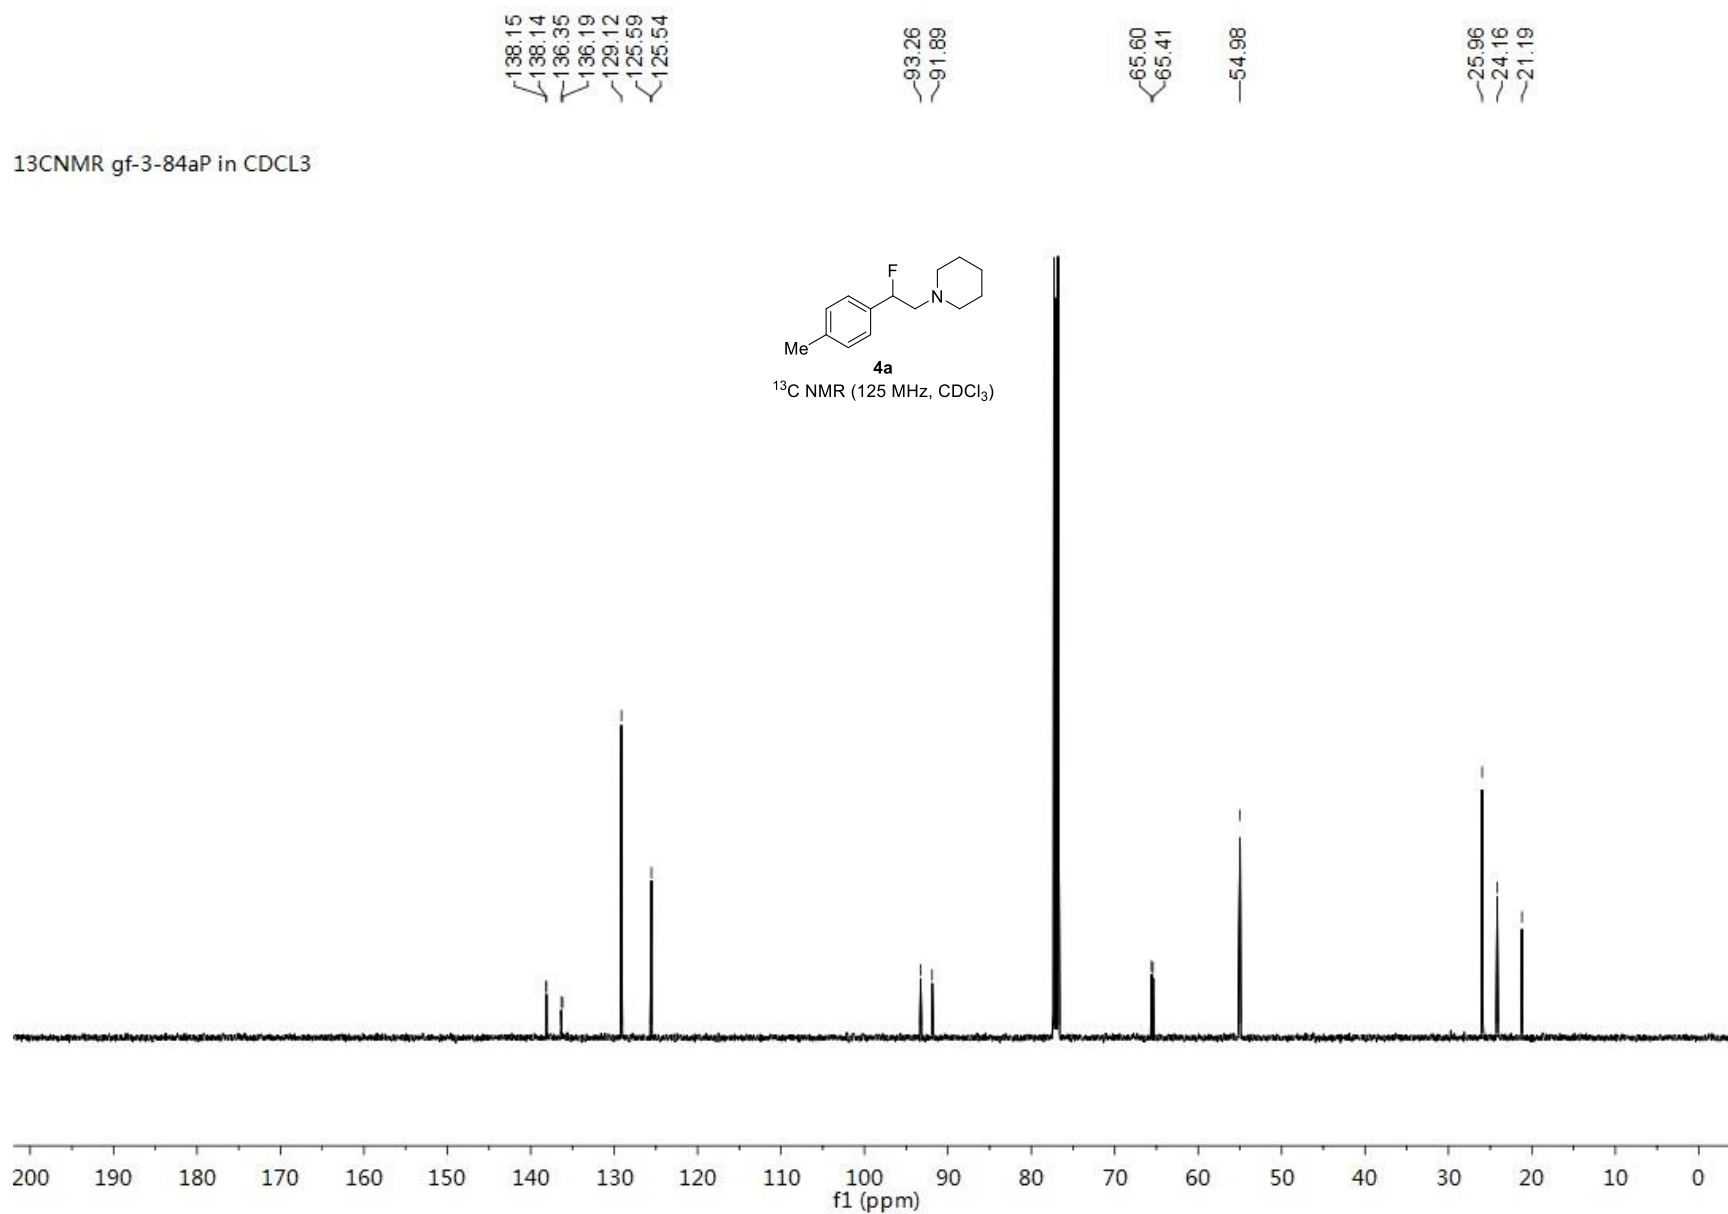

<sup>19</sup>F NMR gf-3-84aP in CDCl<sub>3</sub>

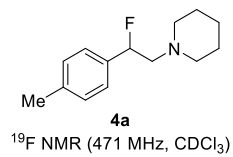

-174.7714

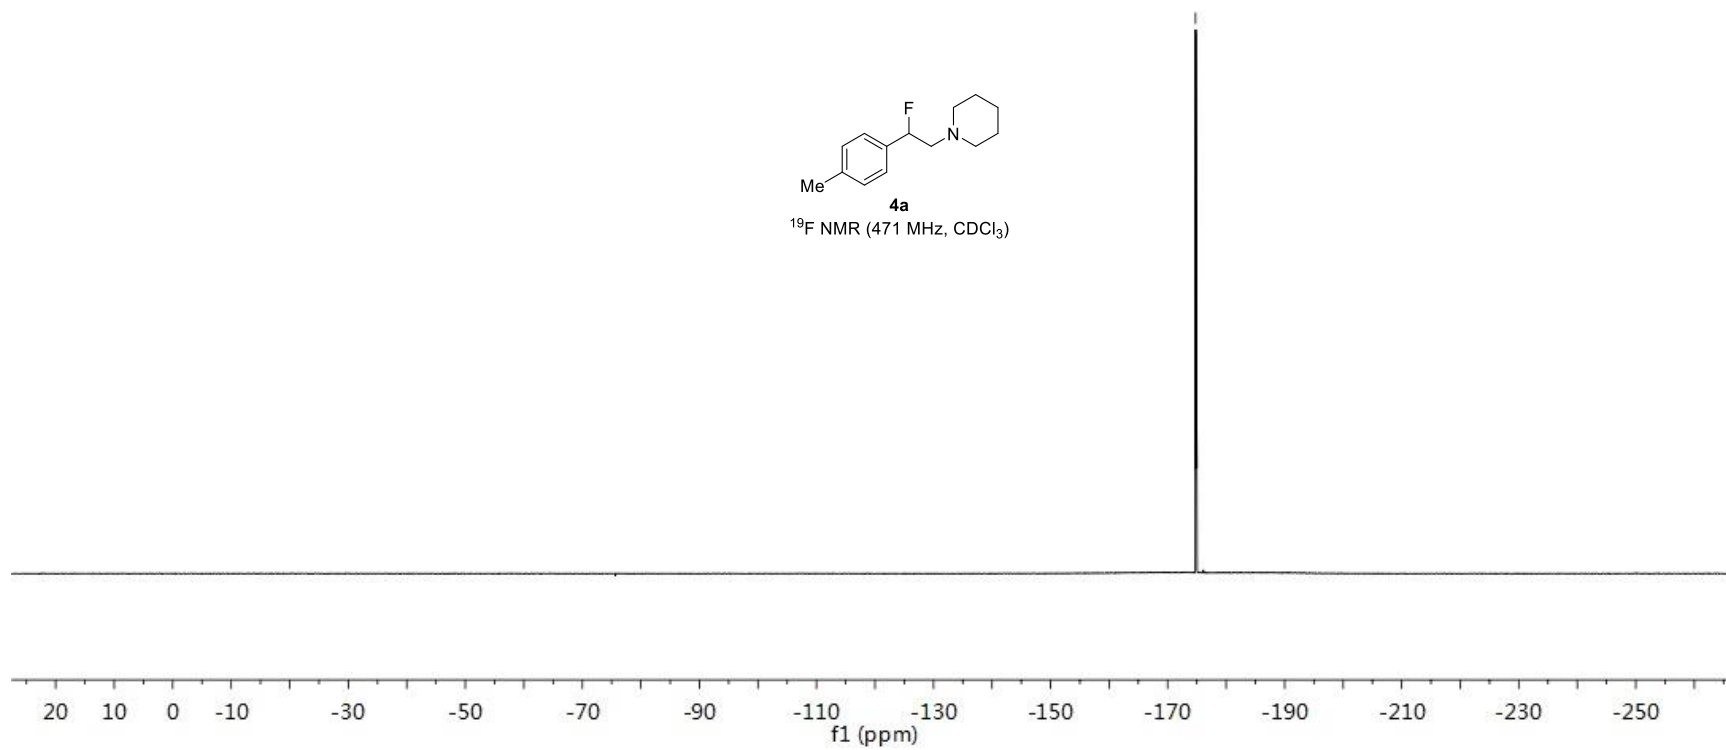

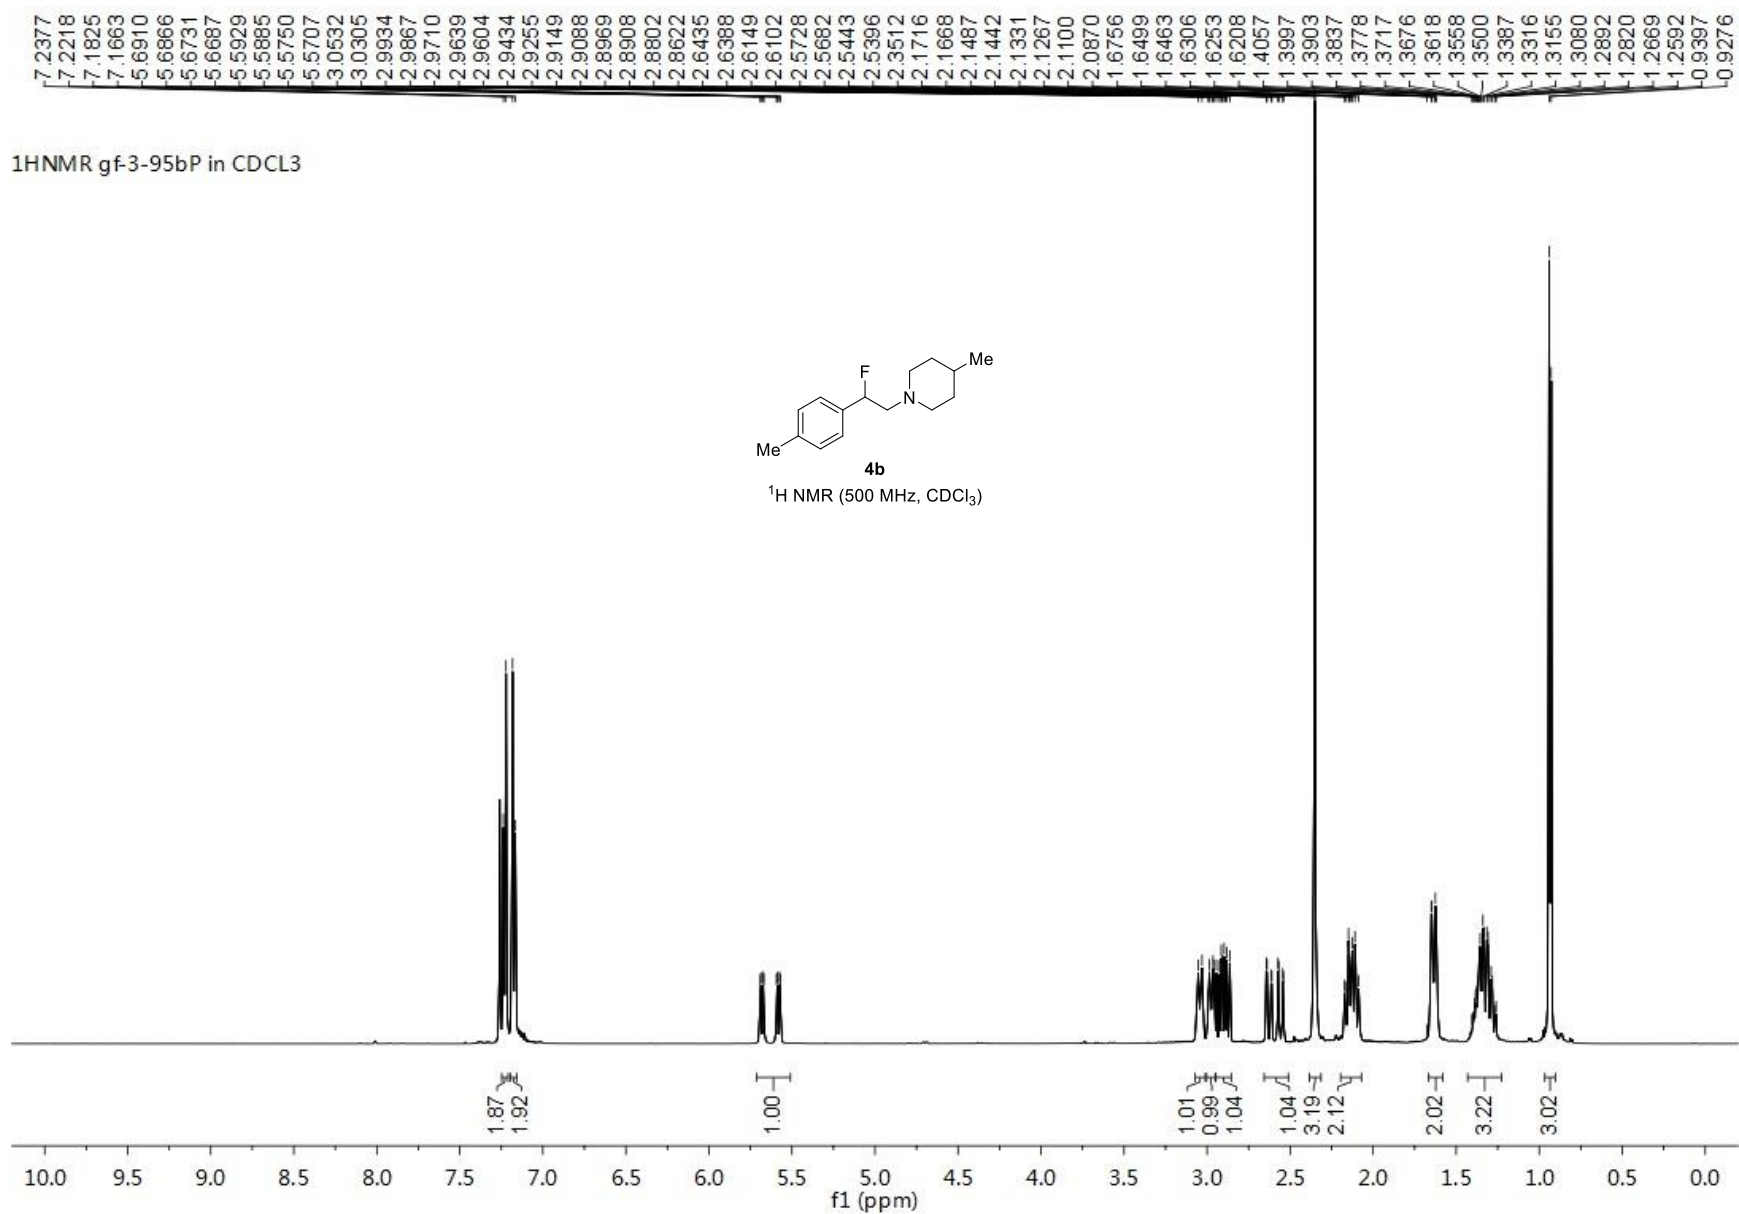

<sup>13</sup>C NMR gf-3-95bP in CDCl<sub>3</sub>

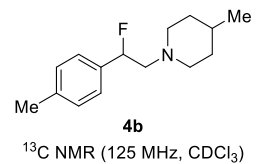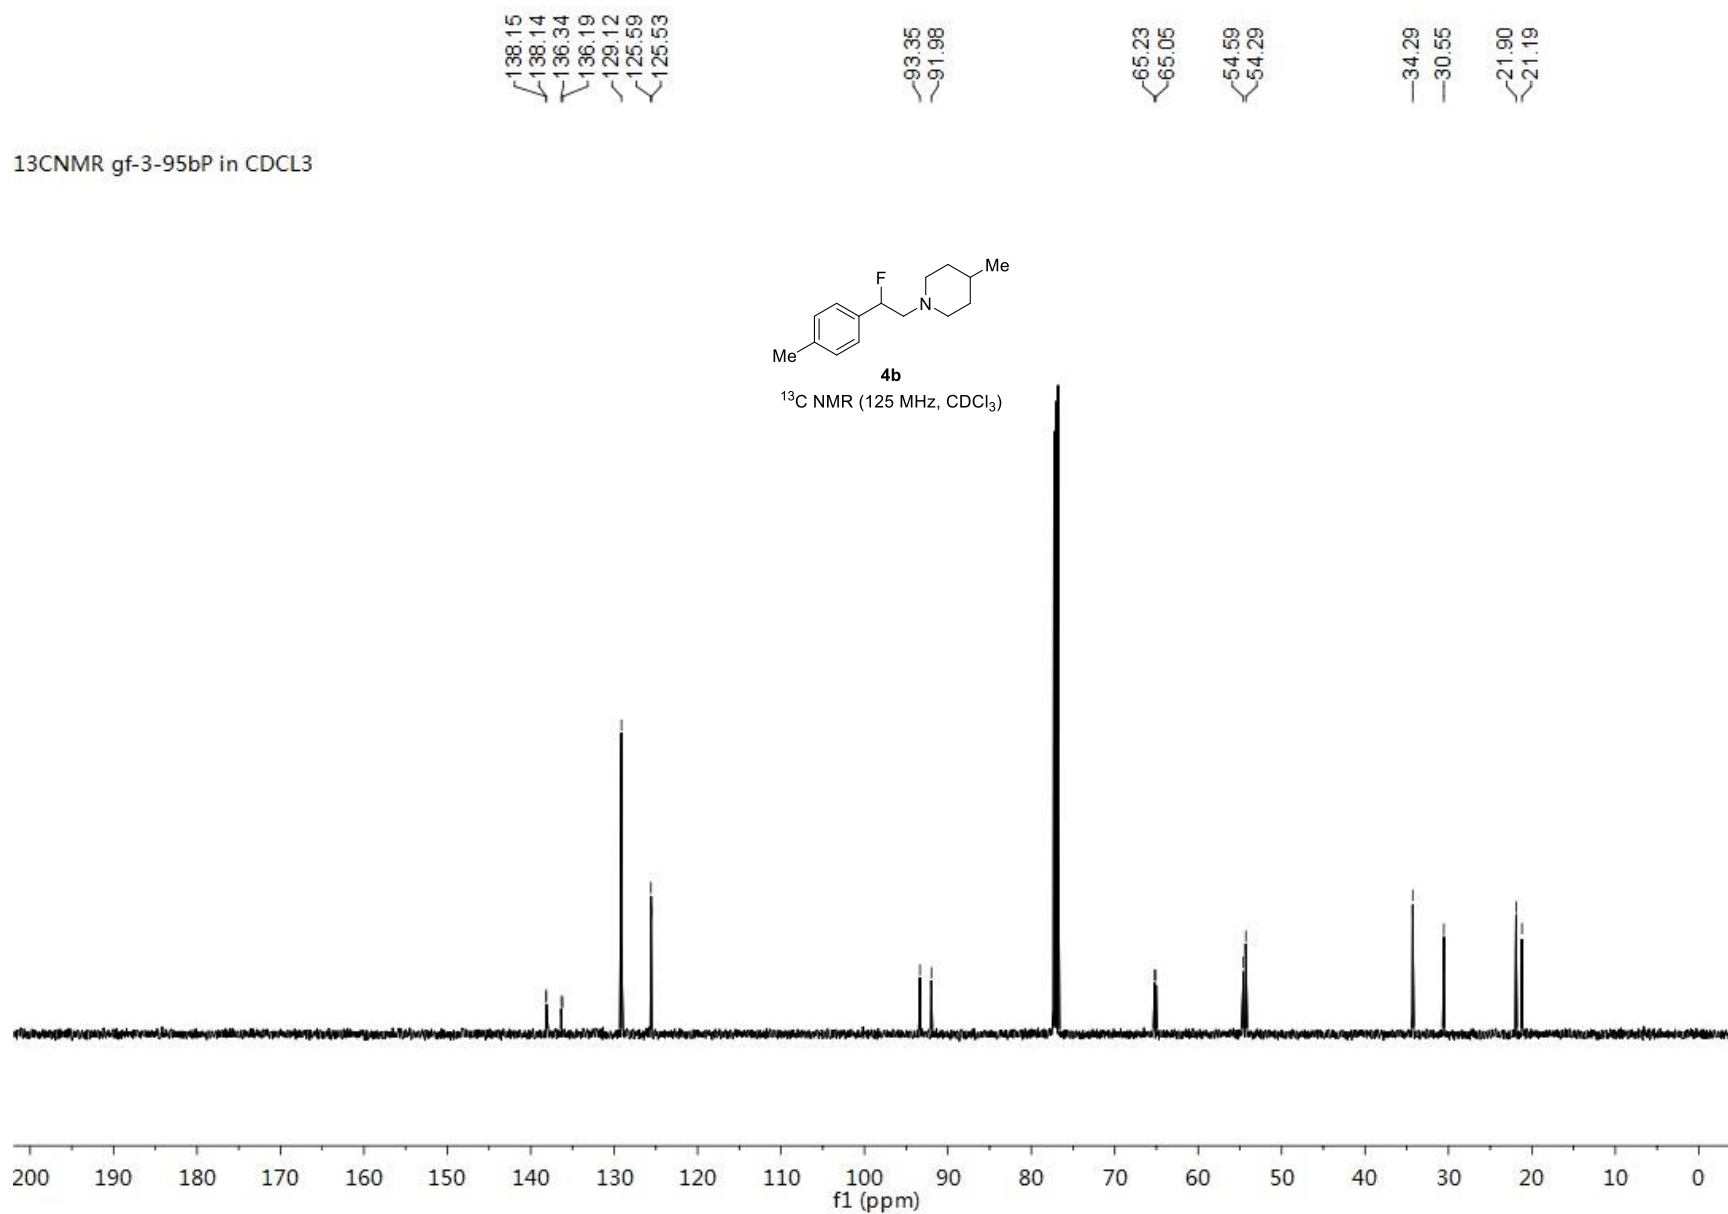

$^{19}\text{F}$ NMR gf-3-95bP in  $\text{CDCl}_3$

---174.8311

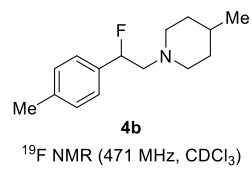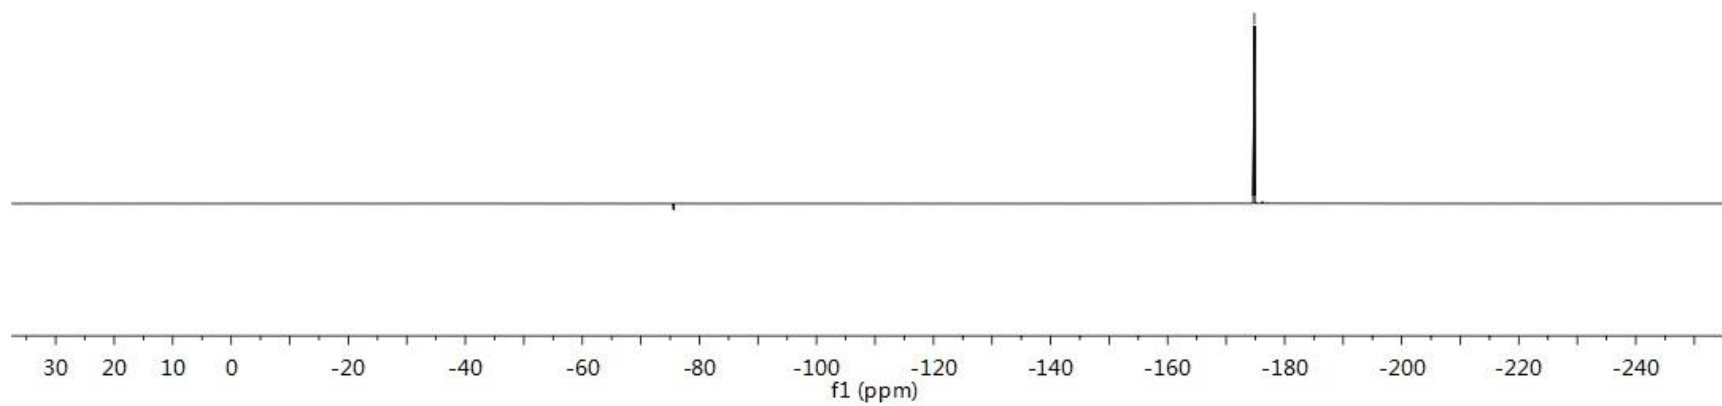

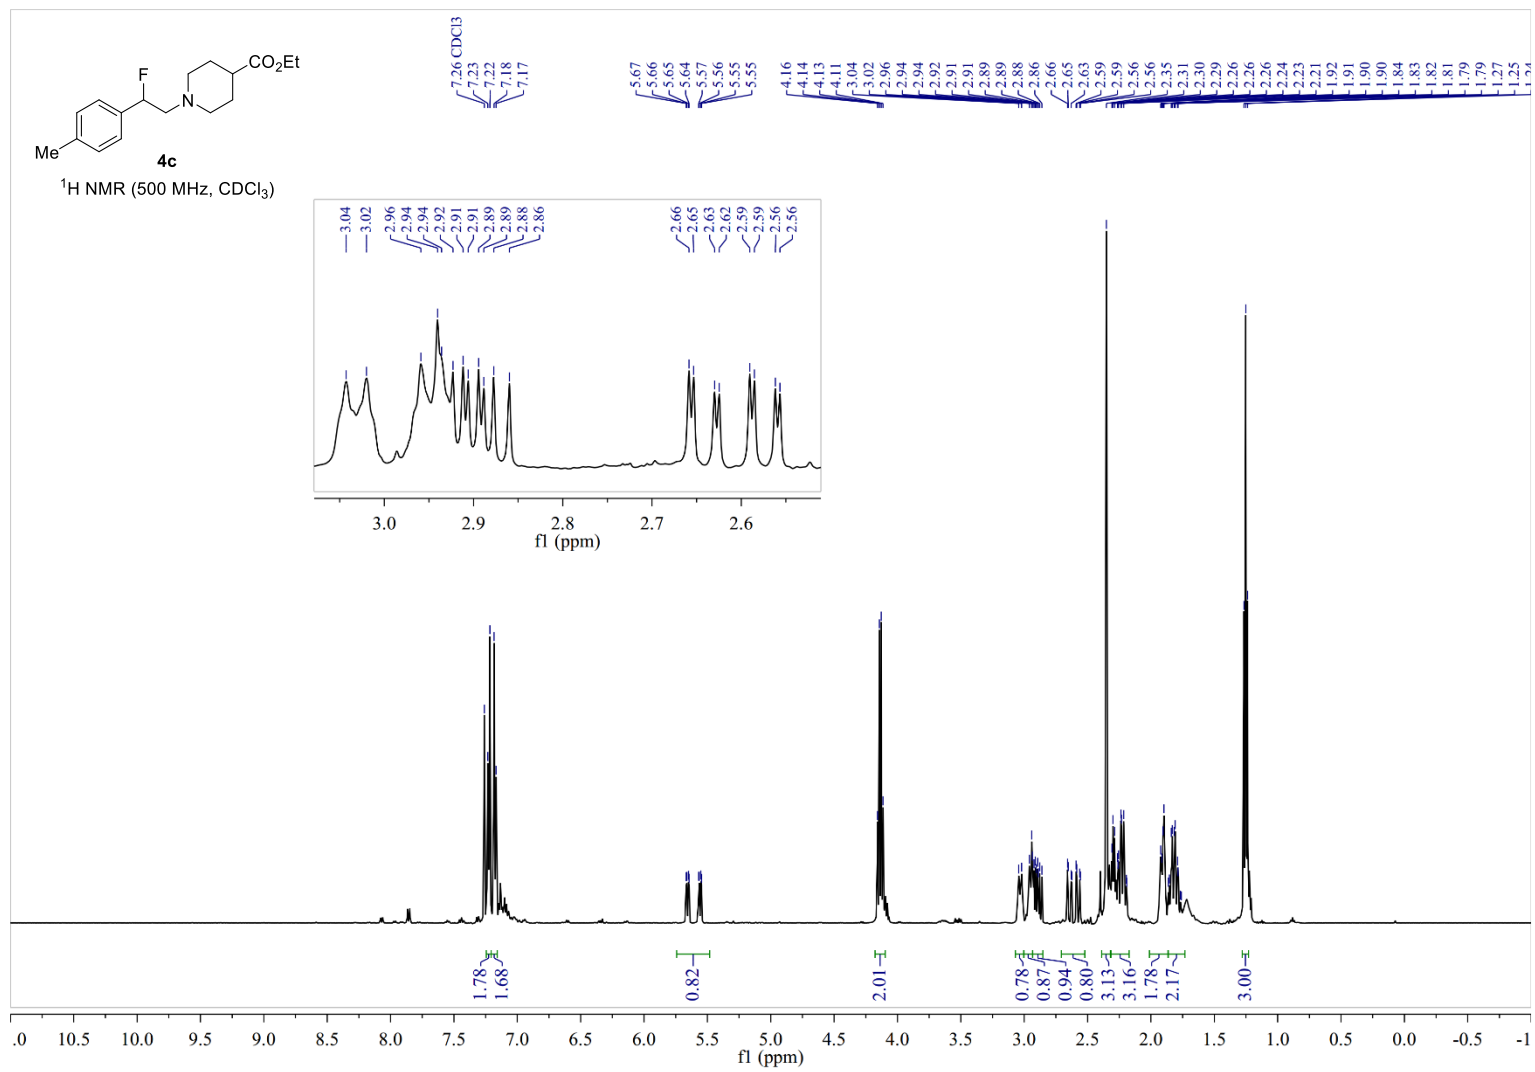

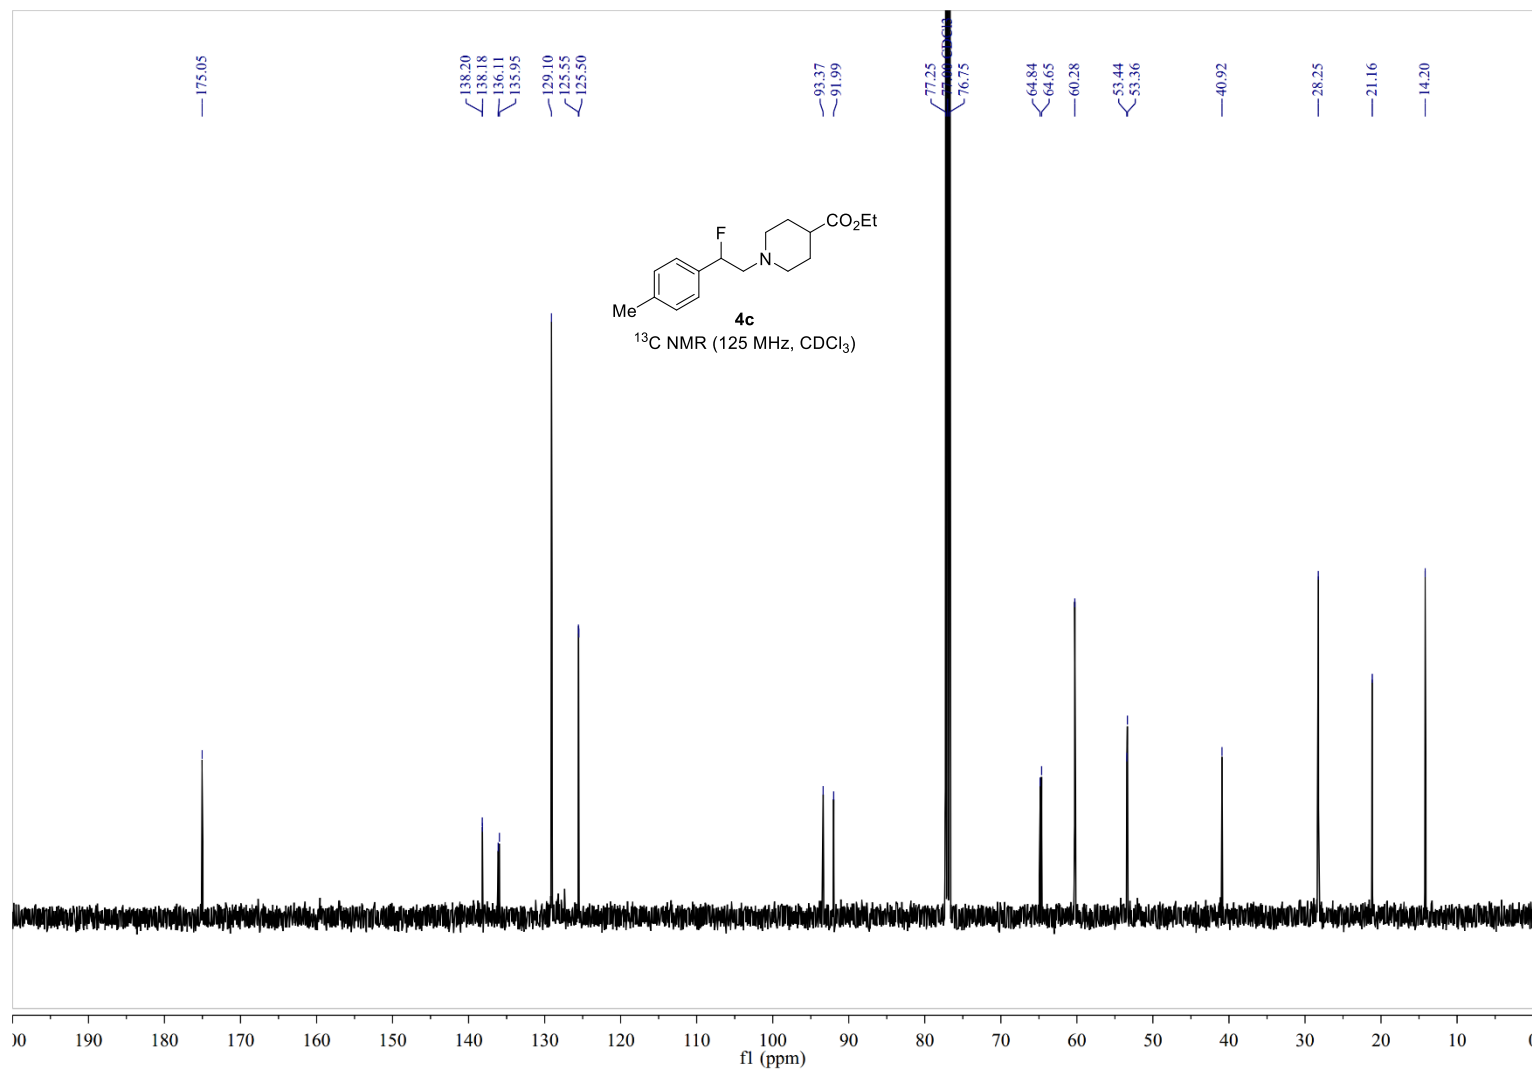



$^{19}\text{F}$ NMR gf-3-84cP in  $\text{CDCl}_3$

—174.9926

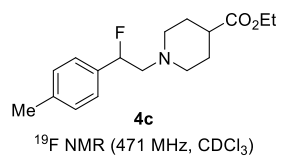

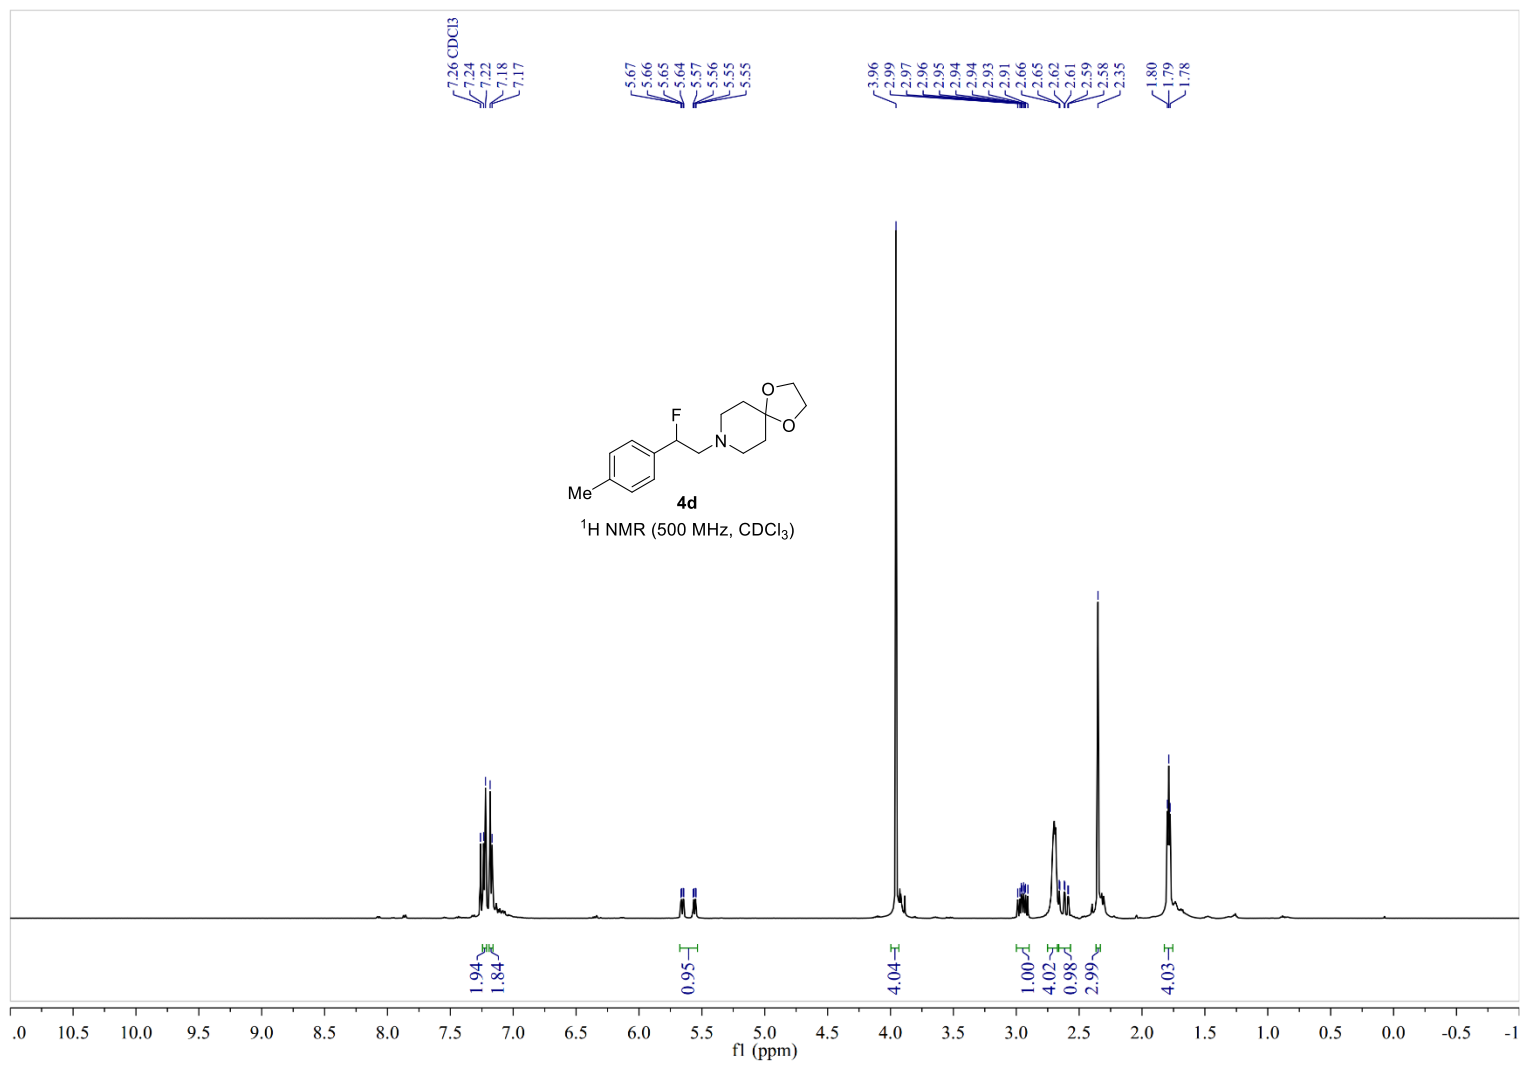

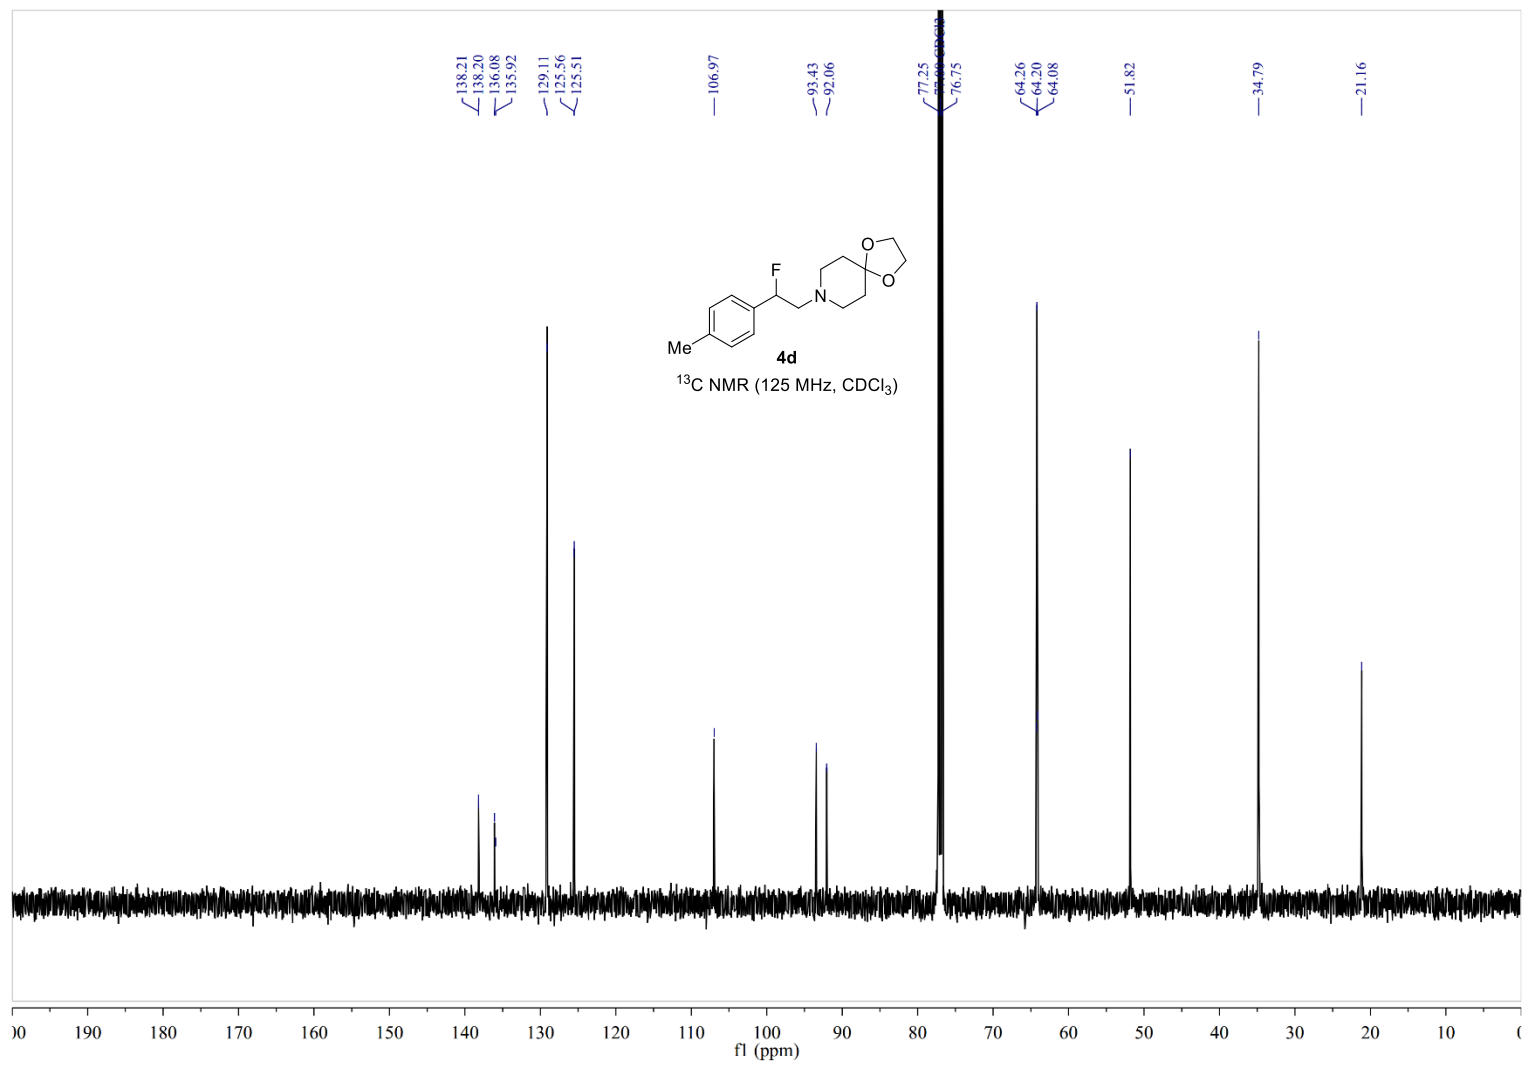

<sup>19</sup>F NMR of compound 4d in CDCl<sub>3</sub>

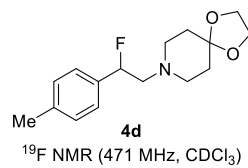

-175.3455

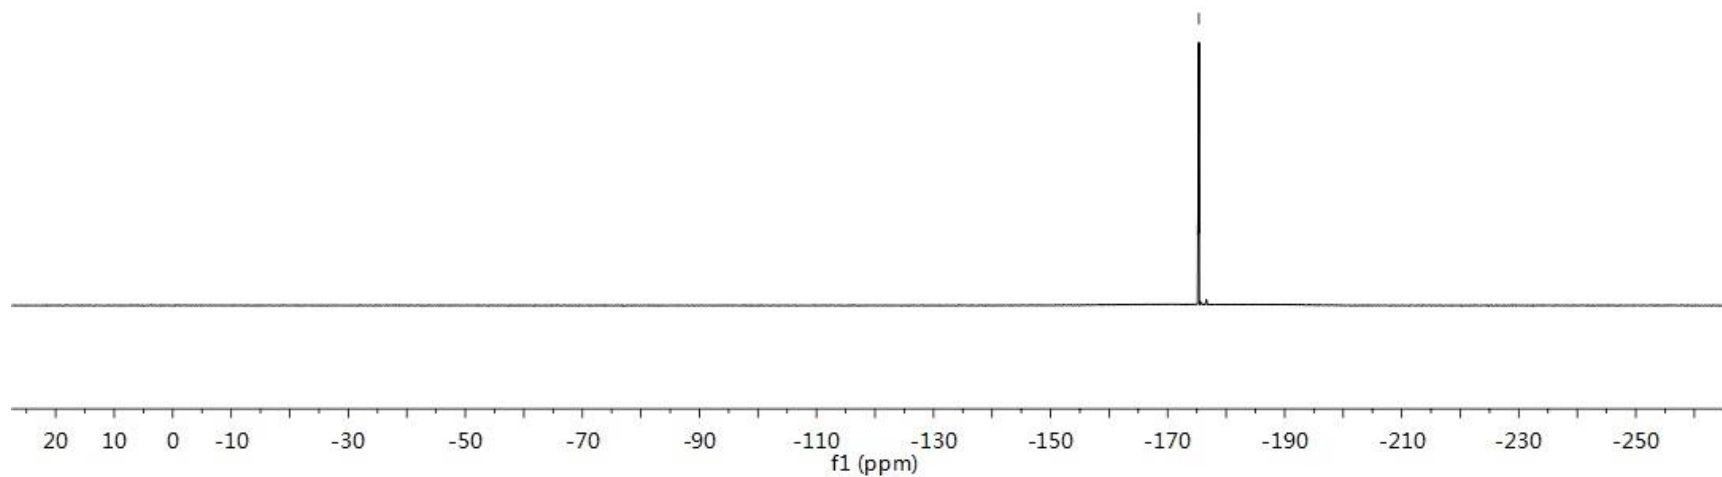

<sup>1</sup>H NMR of gf-3-93dP in CDCl<sub>3</sub>

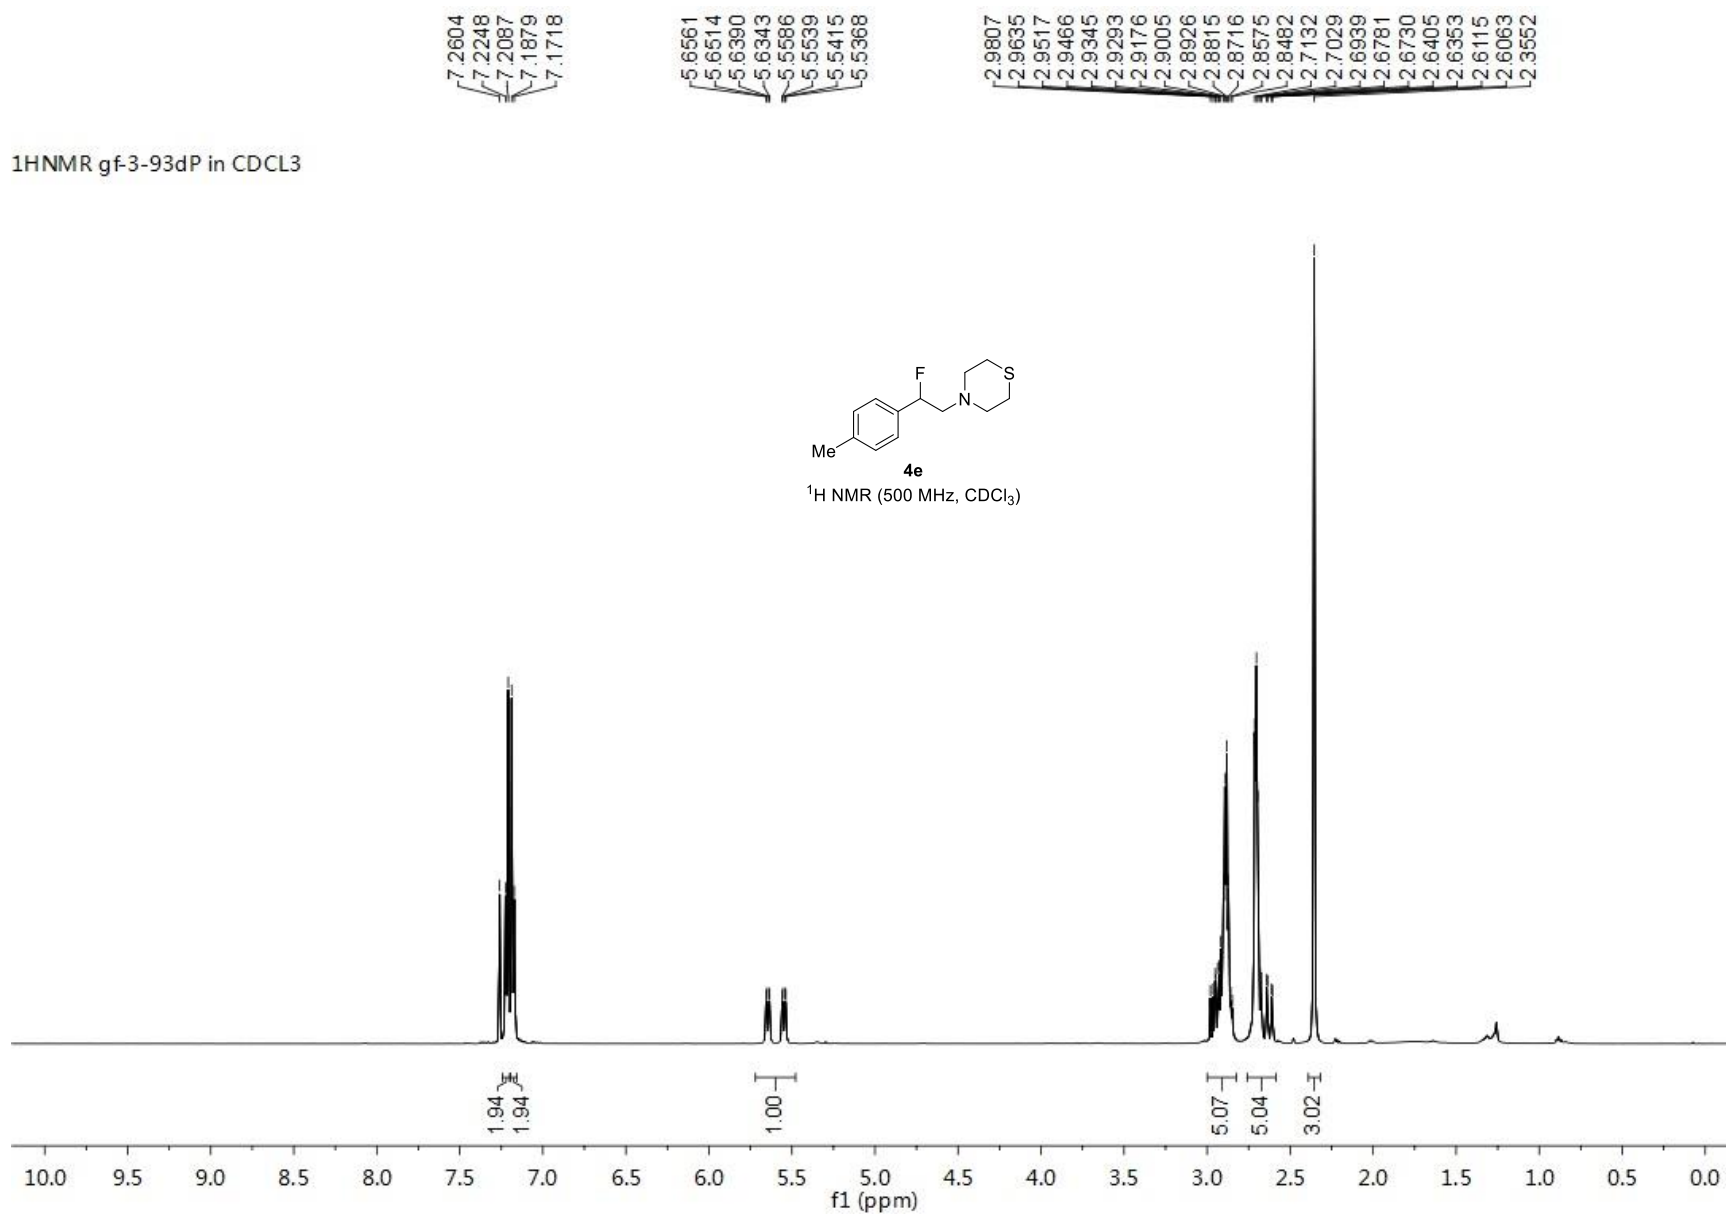

138.33  
138.32  
135.91  
135.75  
129.17  
125.59  
125.54

93.24  
91.86

65.34  
65.15

55.36

27.96

21.20

<sup>13</sup>C NMR gf-3-93dP in CDCl<sub>3</sub>

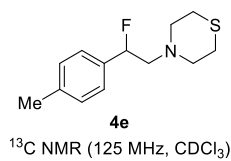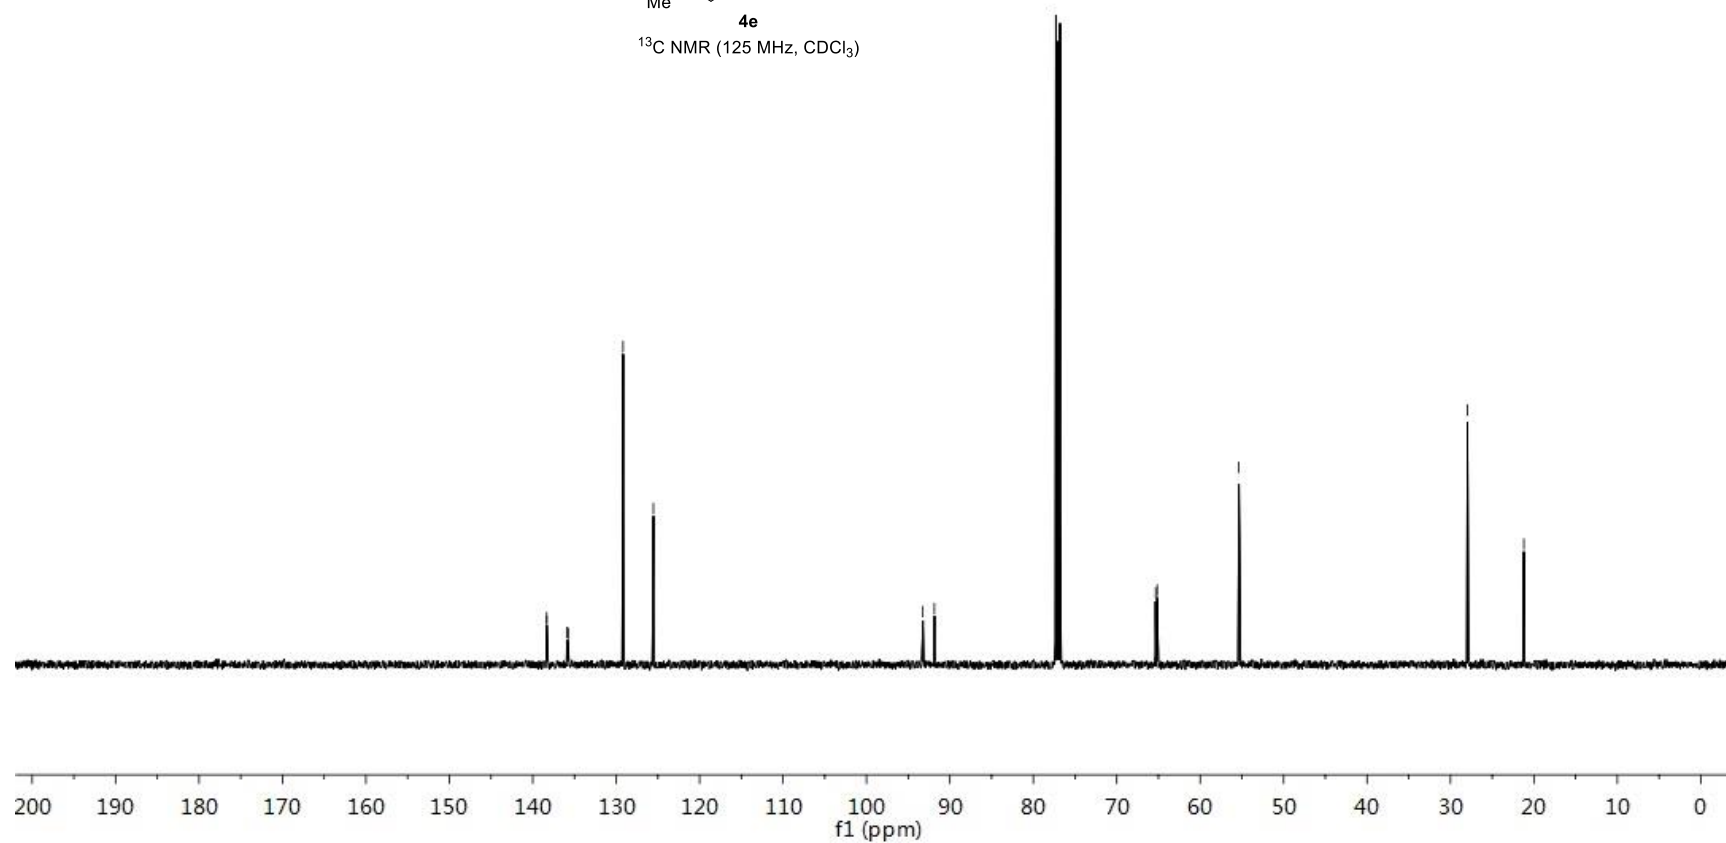

<sup>19</sup>F NMR gf-3-93dP in CDCl<sub>3</sub>

—175.1931

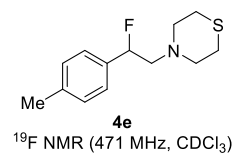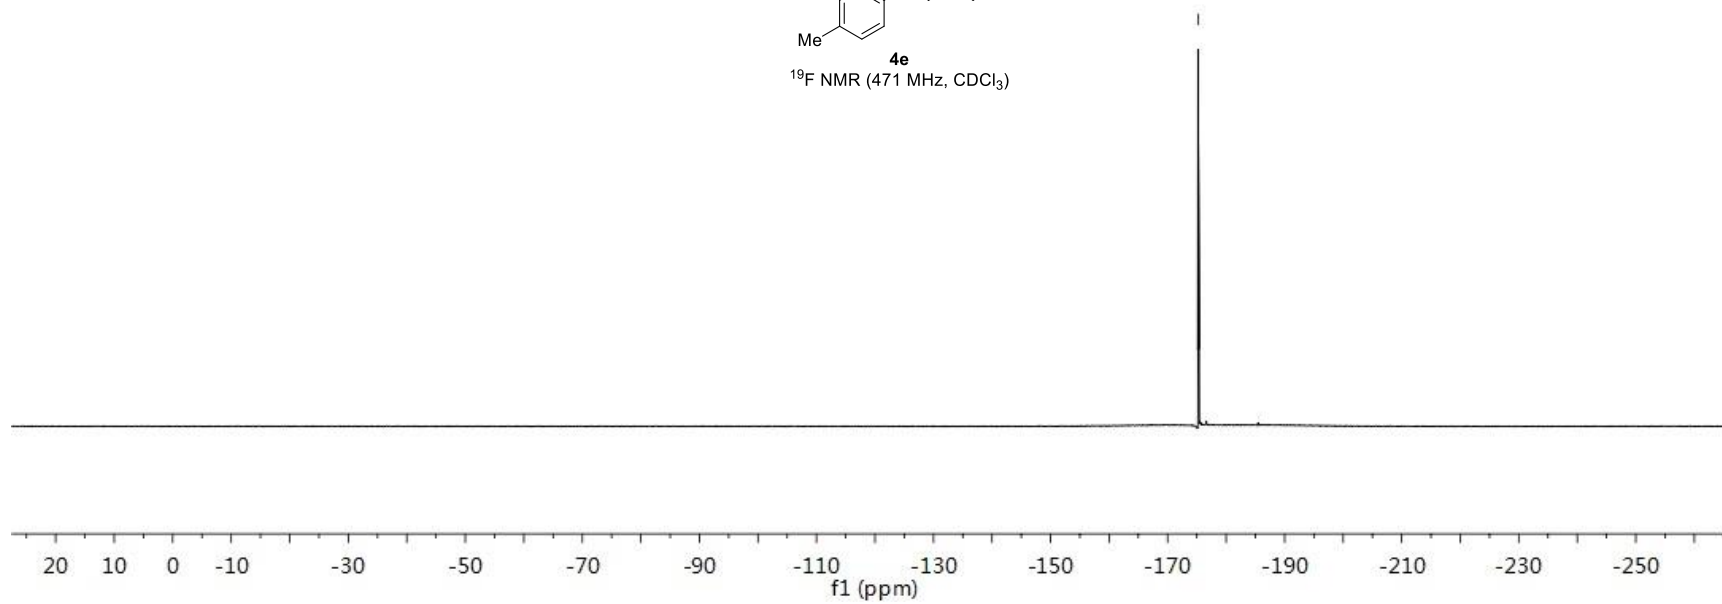

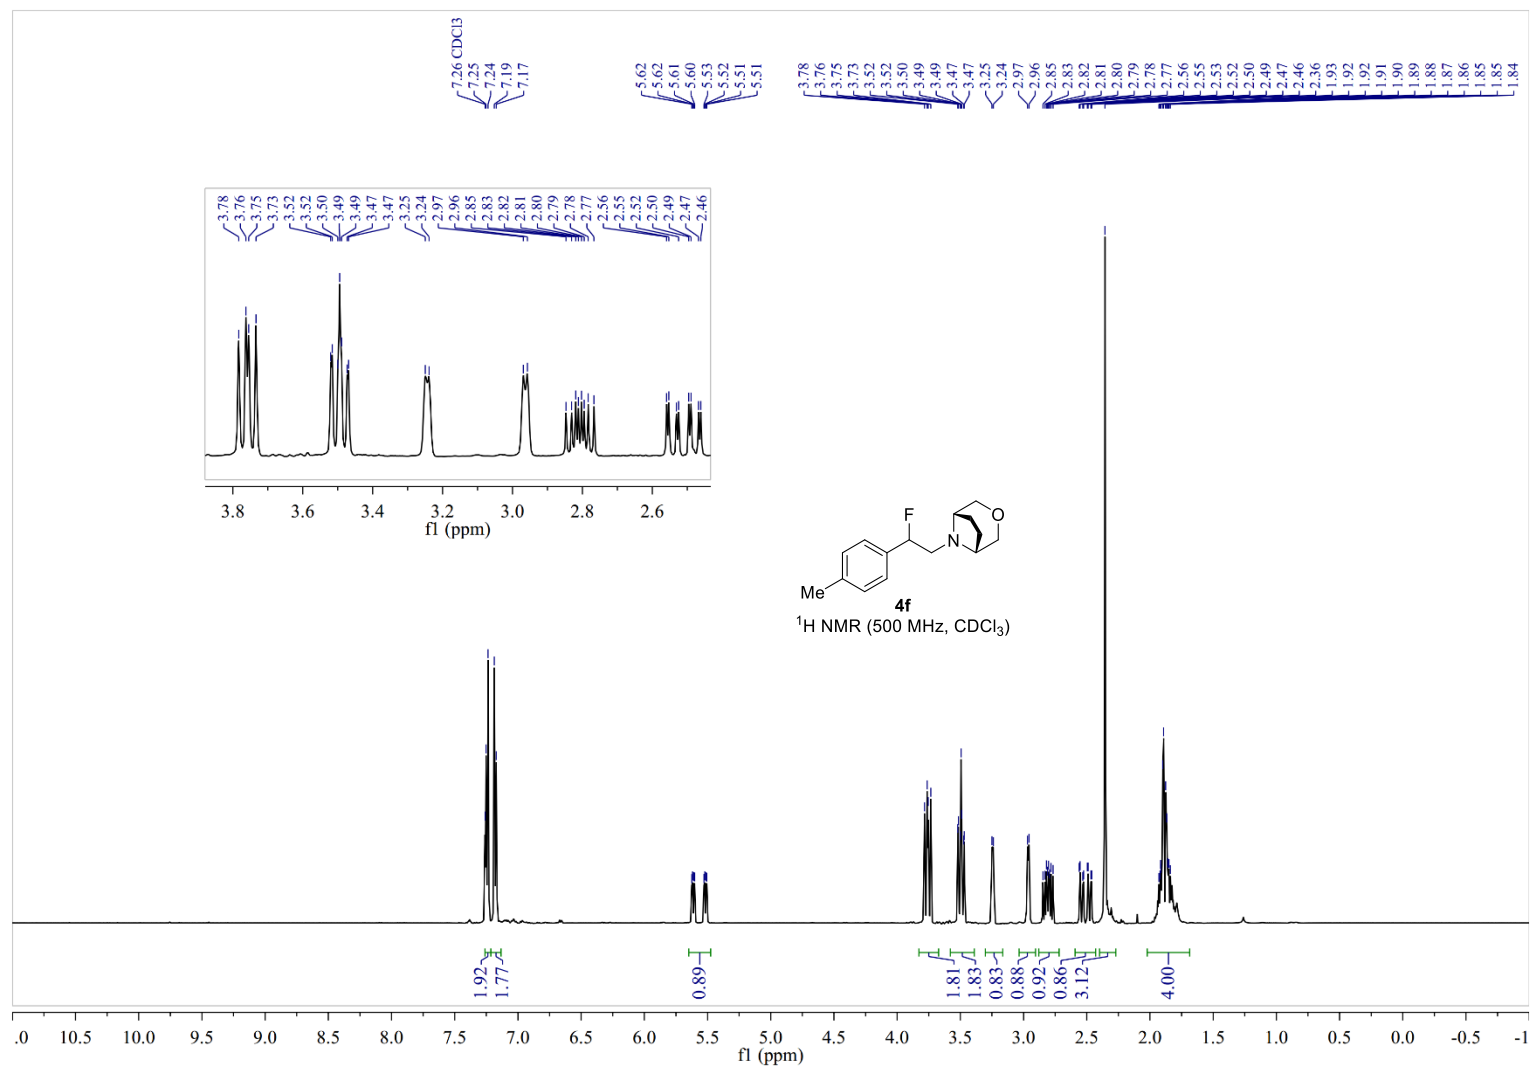



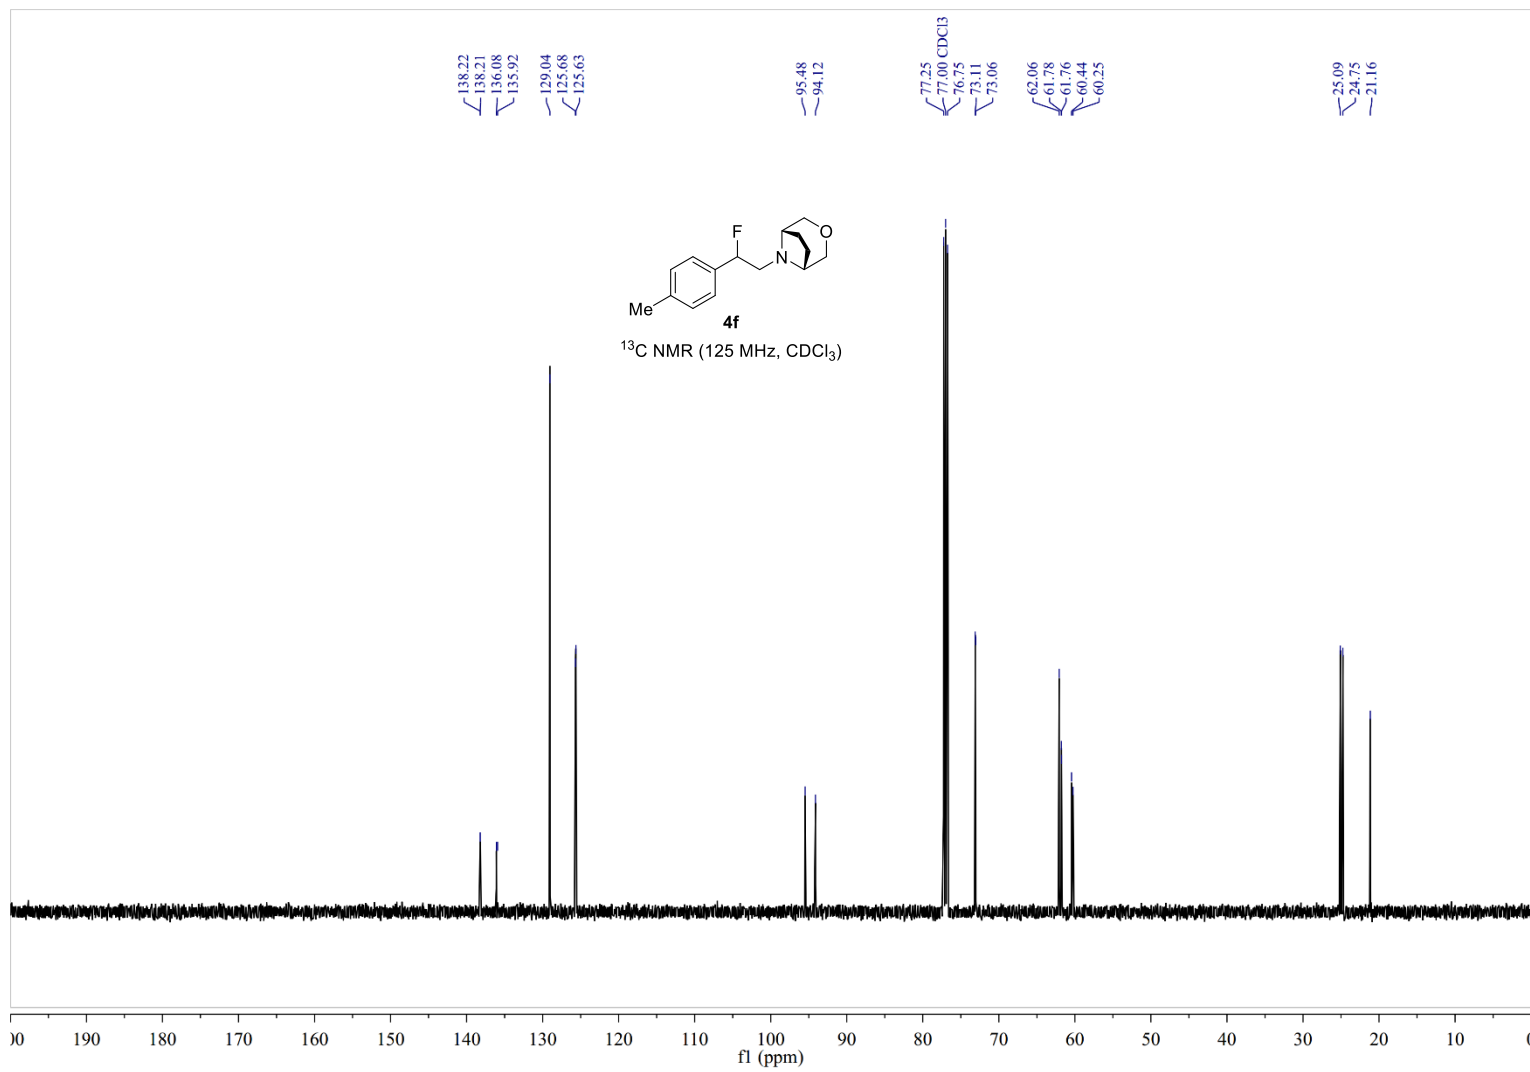

<sup>19</sup>F NMR gf-3-86bP in CDCl<sub>3</sub>

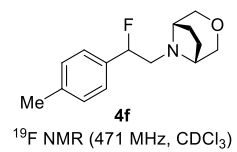

→ -176.7306



7.2604  
7.2356  
7.2197  
7.1912  
7.1752

5.6879  
5.6837  
5.6700  
5.6659  
5.5900  
5.5858  
5.5721  
5.5680

3.7636  
3.7555  
3.7507  
3.7476  
3.7431  
3.7350  
3.7305  
3.7274  
3.7225  
3.7179  
3.7145

2.9287  
2.9102  
2.9075  
2.9003  
2.8241  
2.8021  
2.3565

1.9375  
1.9227  
1.9162  
1.9012  
1.1749  
1.1677  
1.1623

<sup>1</sup>H NMR of **4g** in CDCl<sub>3</sub>

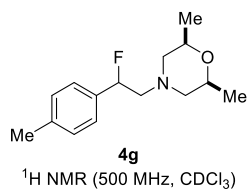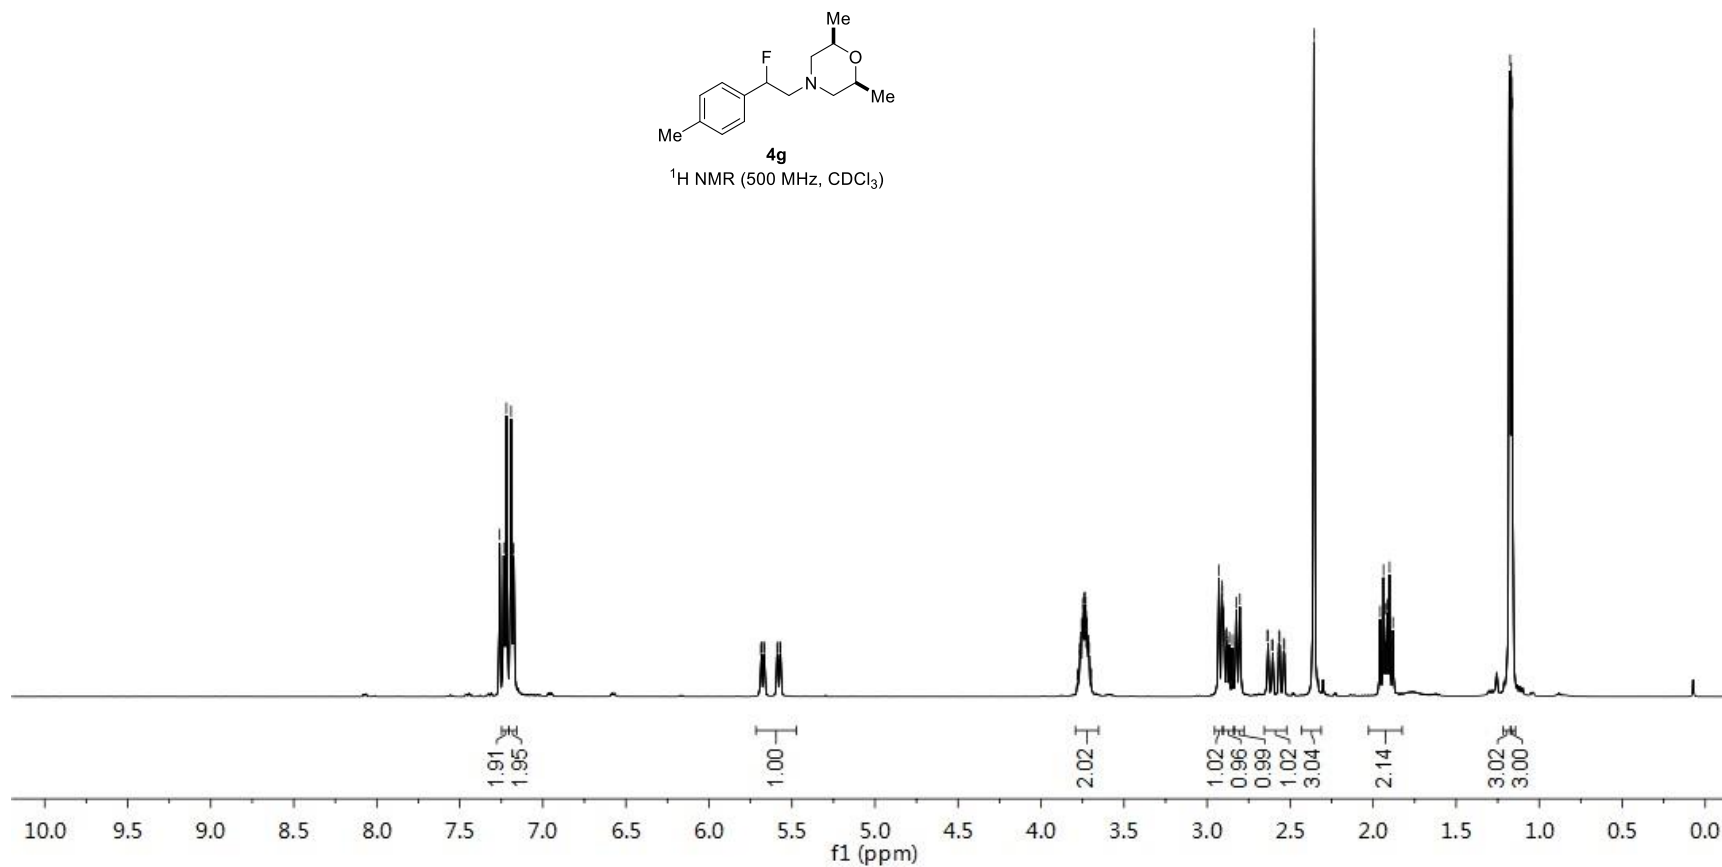

138.35  
138.33  
135.92  
135.76  
129.18  
125.59  
125.54

93.25  
91.87

71.67  
71.65  
64.68  
64.50  
60.07  
59.64

21.20  
19.17  
19.14

<sup>13</sup>C NMR gf-3-95aP in CDCl<sub>3</sub>

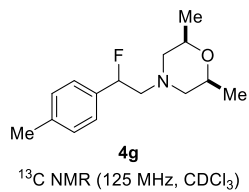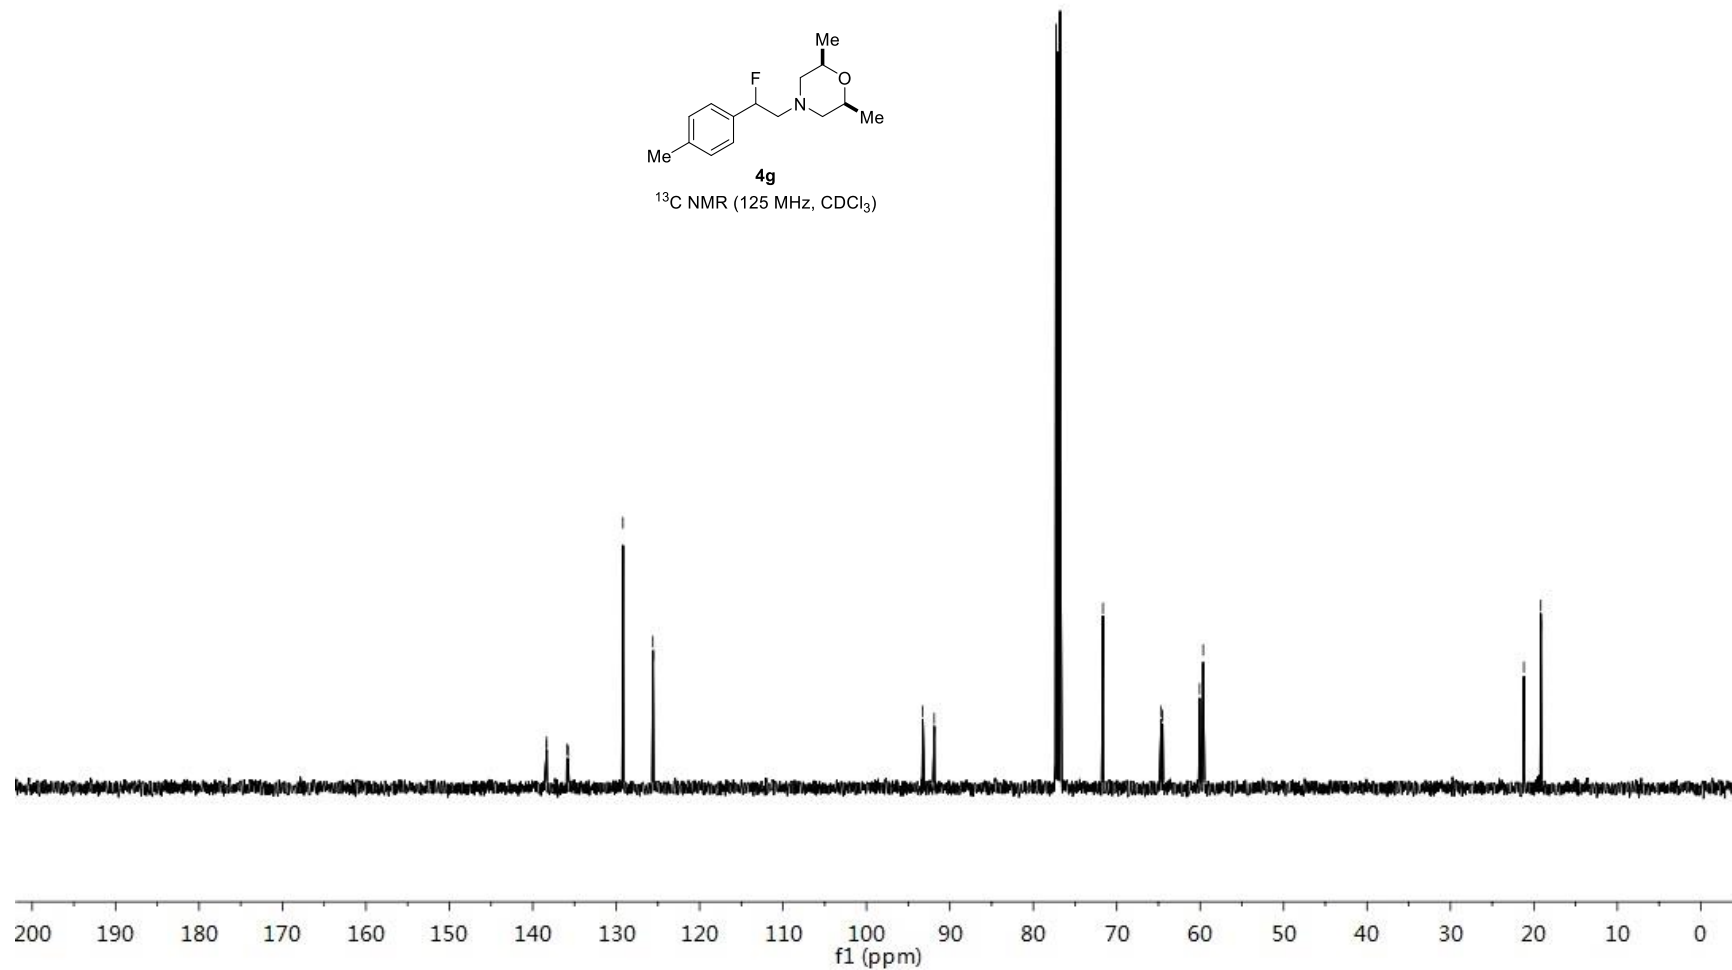

<sup>19</sup>F NMR gf-3-95aP in CDCl<sub>3</sub>

—175.1683

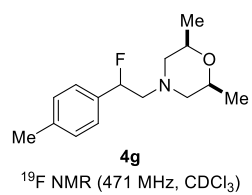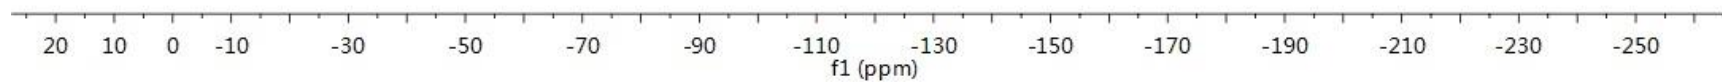

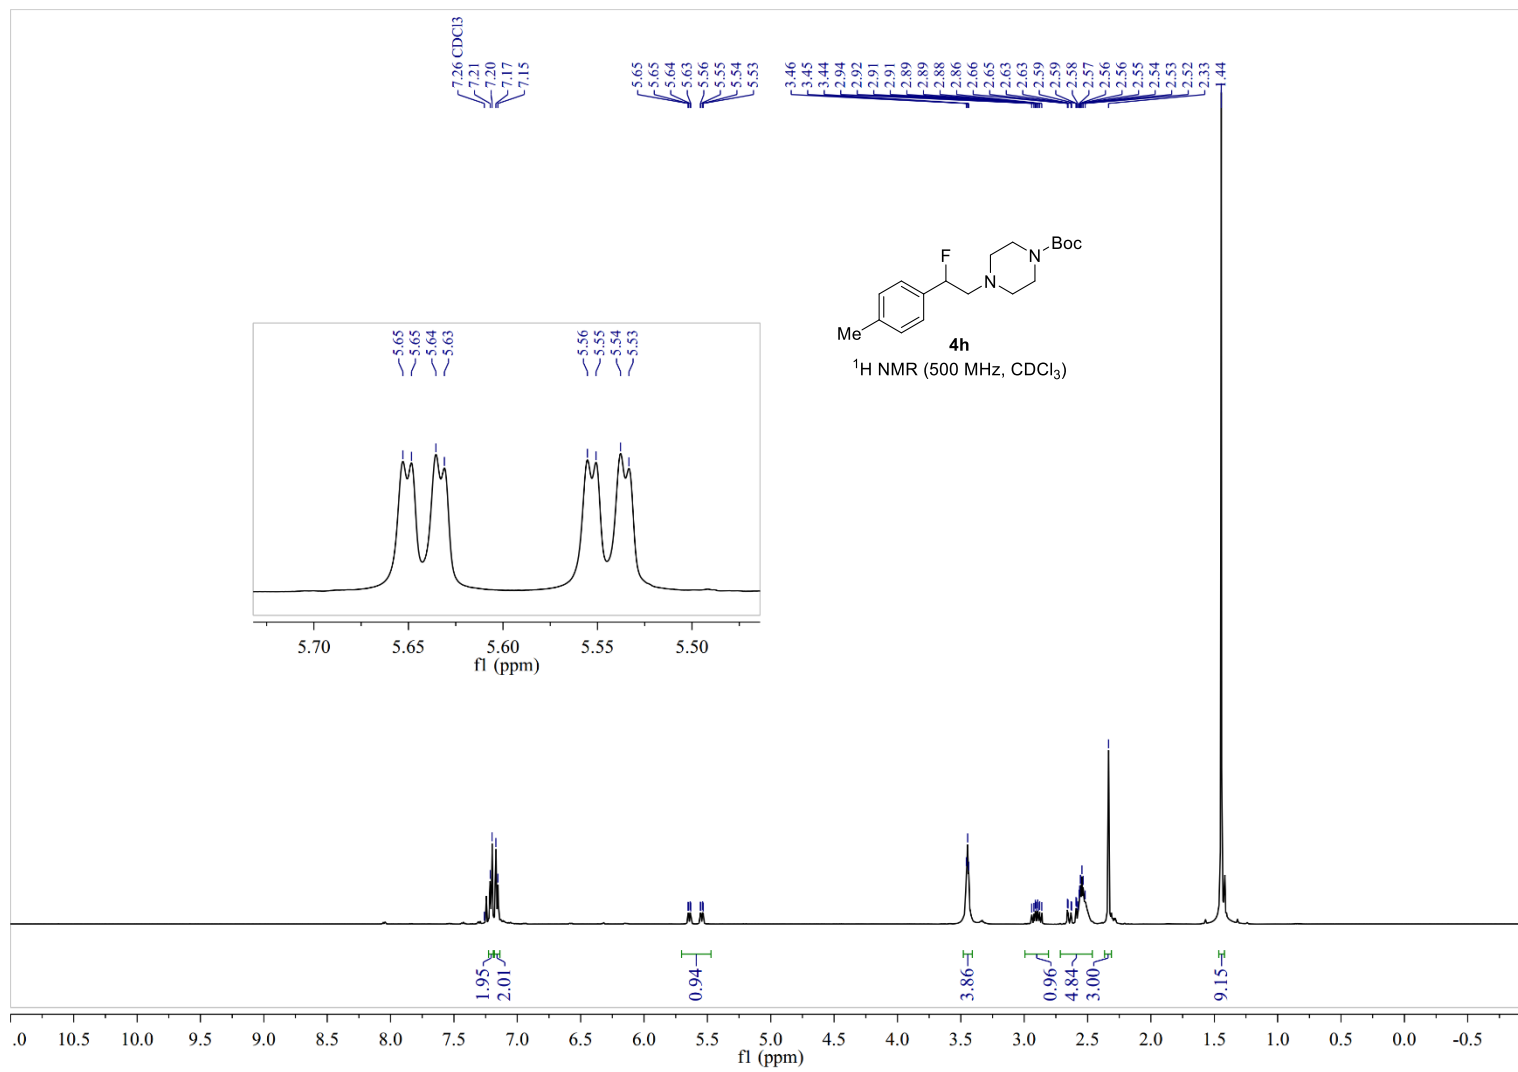

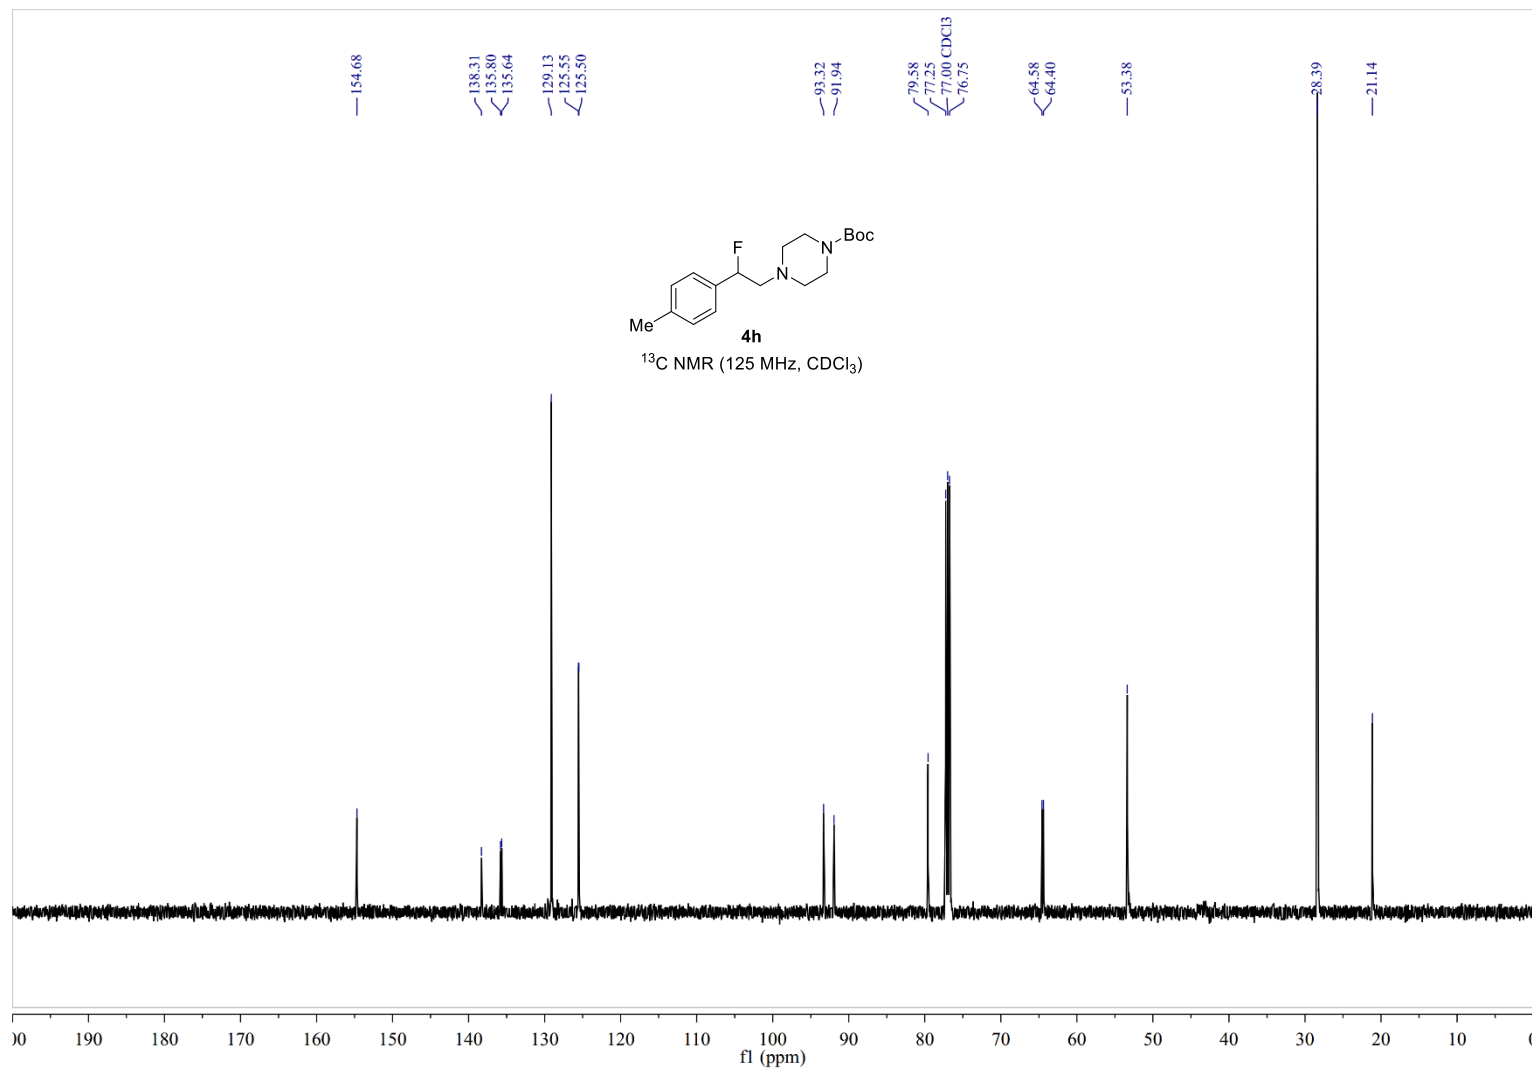

<sup>19</sup>F NMR of compound 4h in CDCl<sub>3</sub>

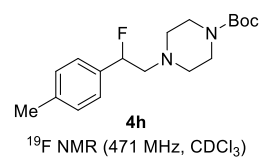

175.1202

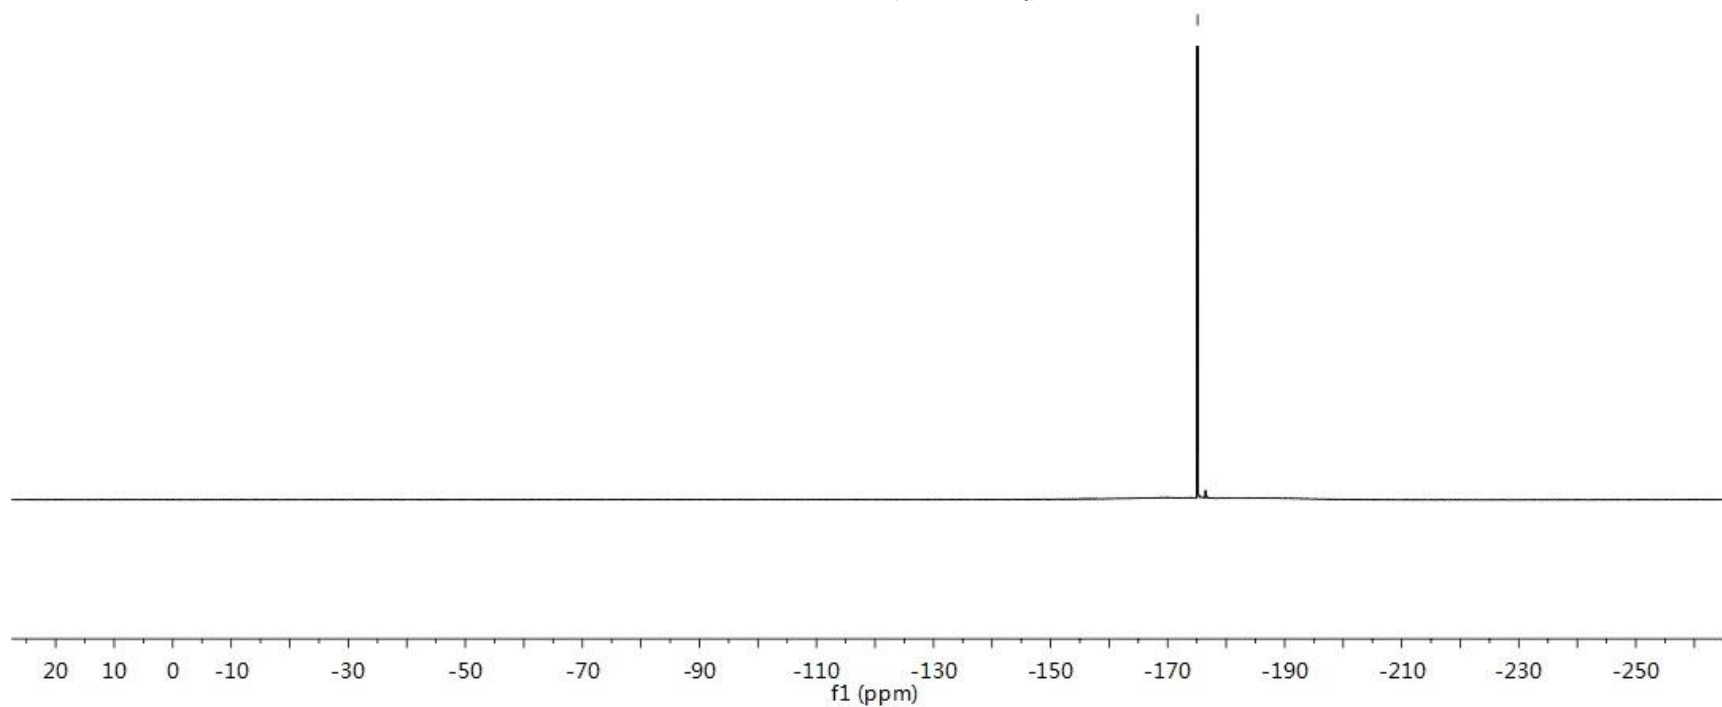



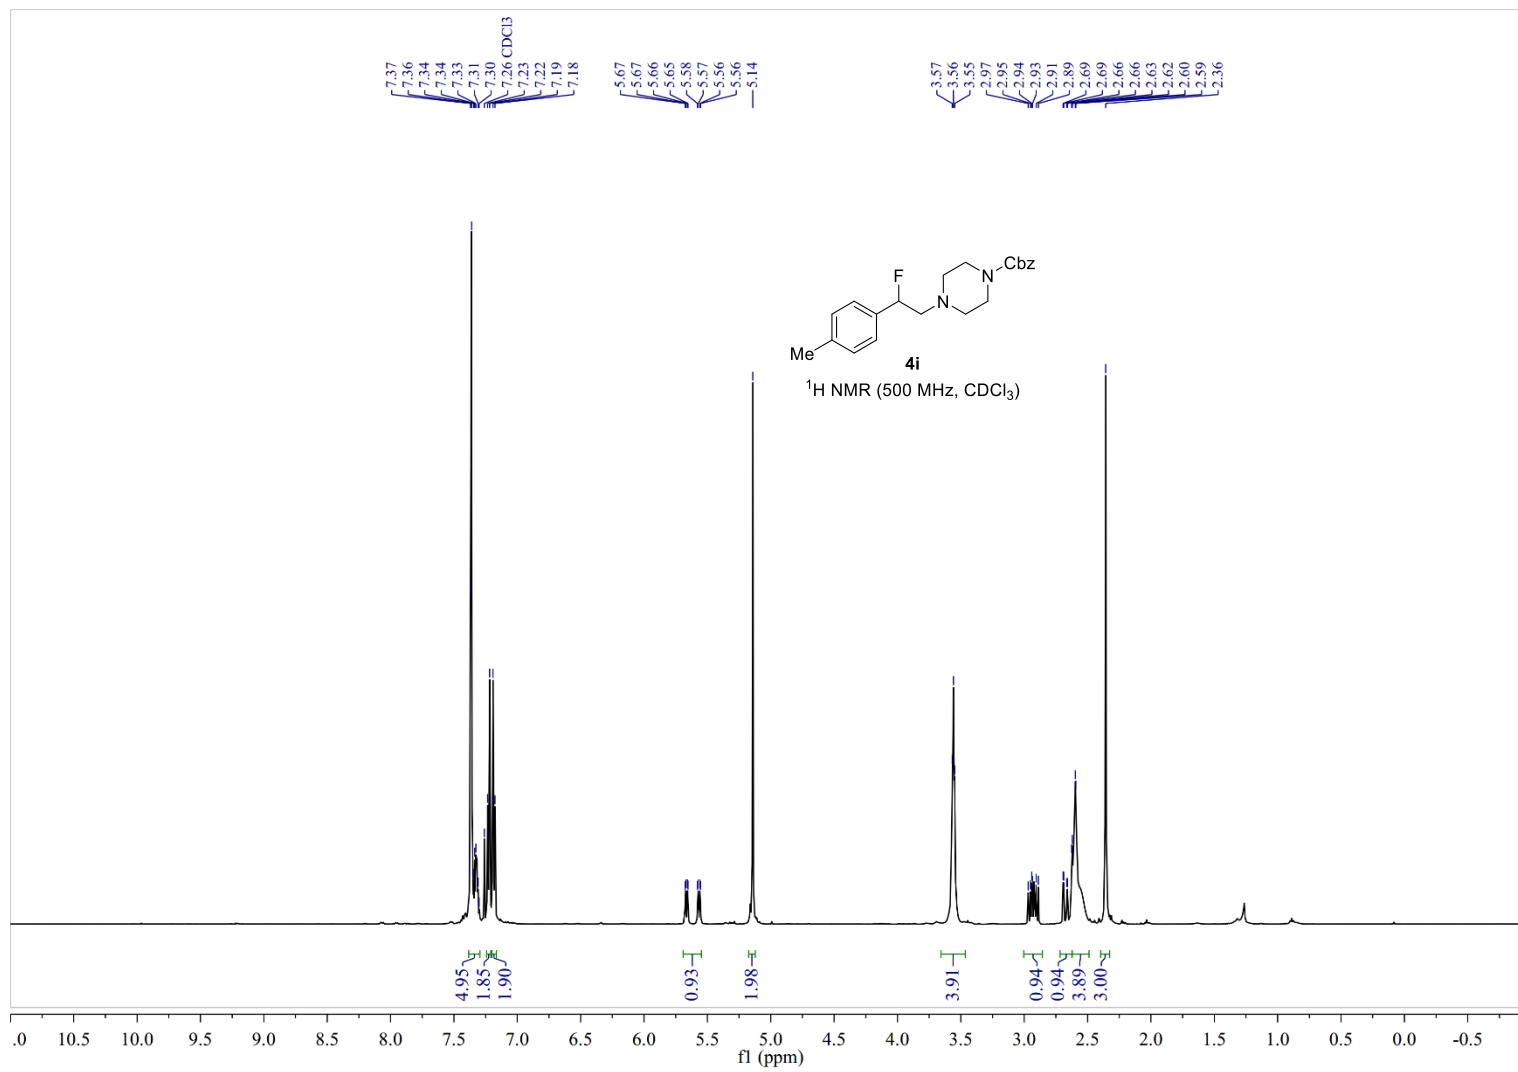

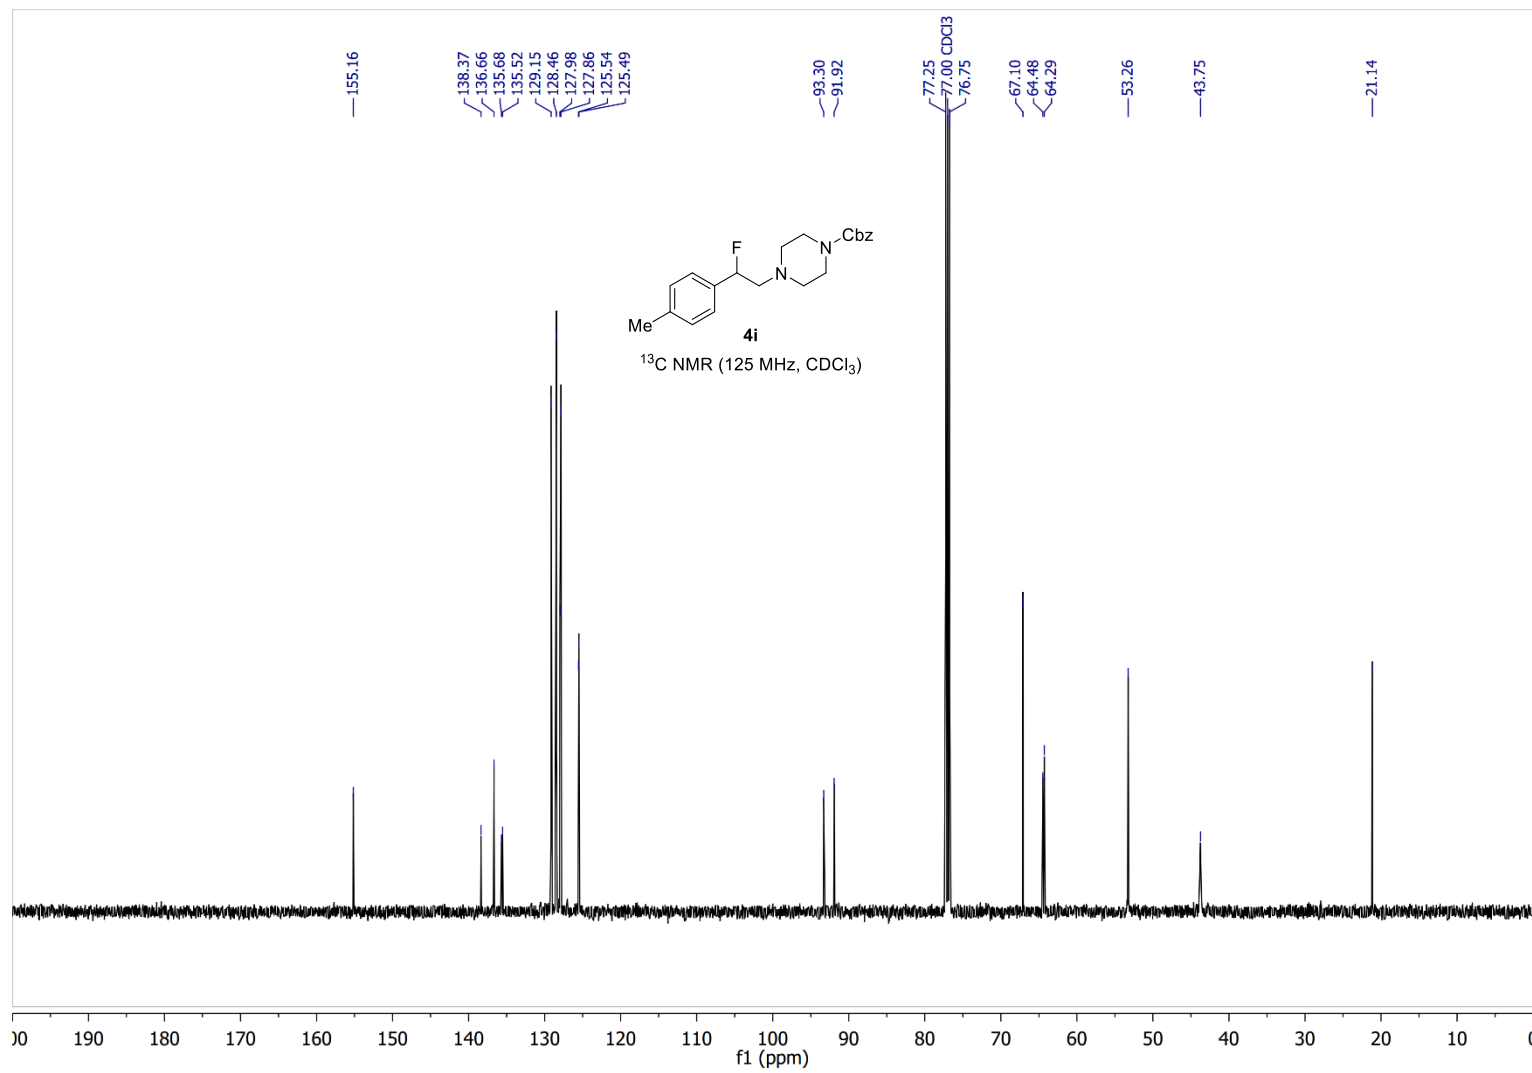

$^{19}\text{F}$ NMR gf-3-84bPP in  $\text{CDCl}_3$

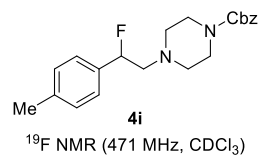

-175.1542



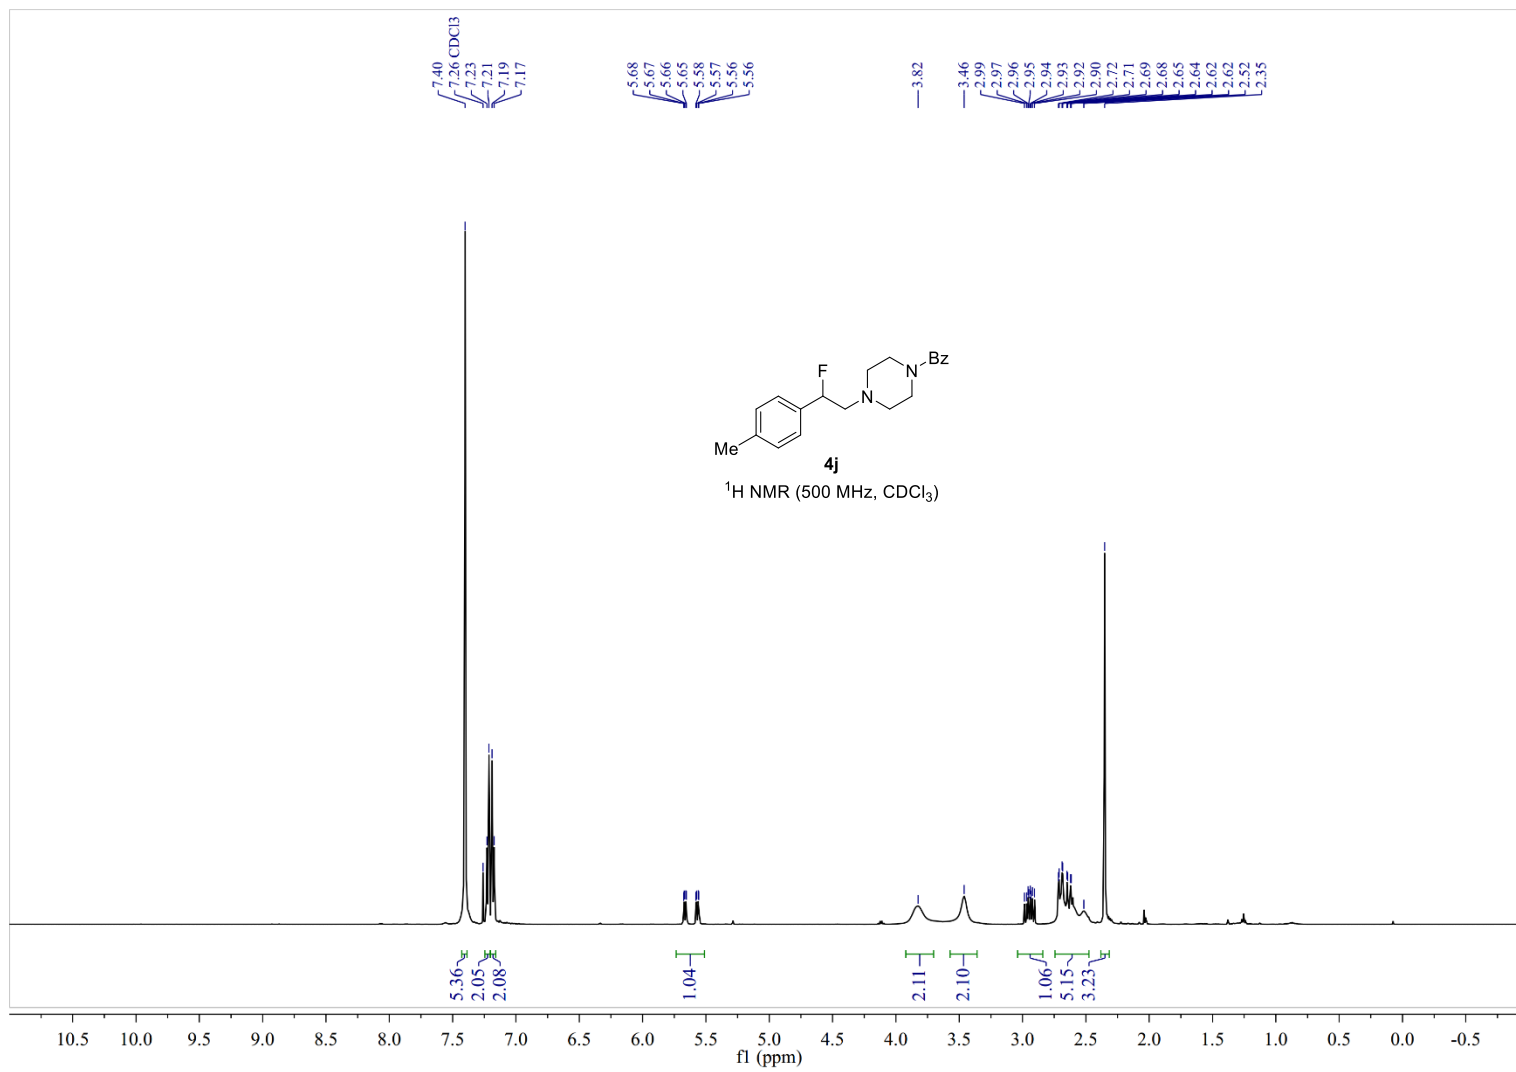

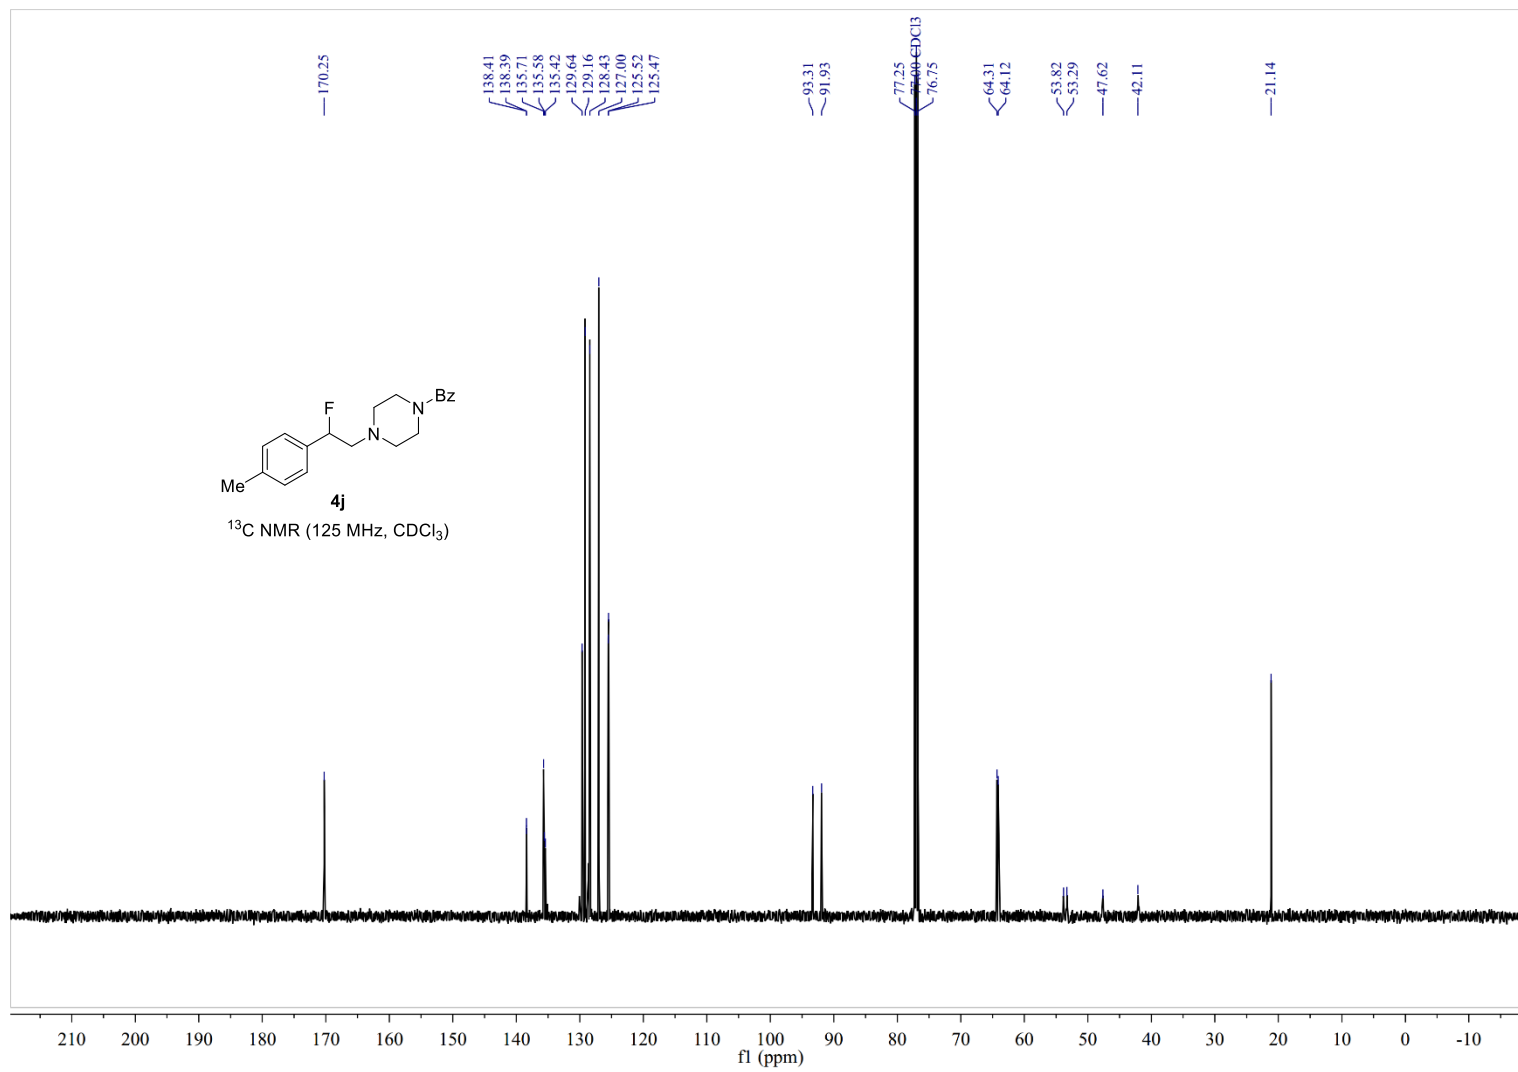

<sup>19</sup>F NMR gf-3-96dP in CDCl<sub>3</sub>

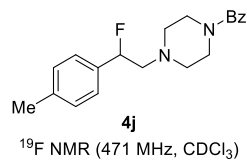

175.1636



7.2603  
7.2301  
7.2144  
7.1900  
7.1742  
6.5505  
6.5293  
6.3029  
6.3000  
6.2693  
6.2663  
6.2658  
5.7000  
5.6818  
5.6789  
5.6650  
5.5815  
5.5668  
5.5651  
3.8236  
3.7605  
3.7116  
3.6570  
3.6000  
3.5419  
2.9756  
2.9581  
2.9468  
2.9418  
2.9294  
2.9243  
2.9130  
2.8955  
2.7402  
2.7060  
2.6774  
2.6375  
2.6151  
2.5876  
2.5290  
2.3531

<sup>1</sup>H NMR of gf-3-241aP in CDCl<sub>3</sub>

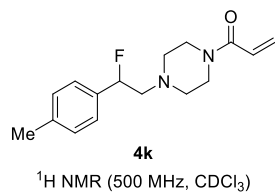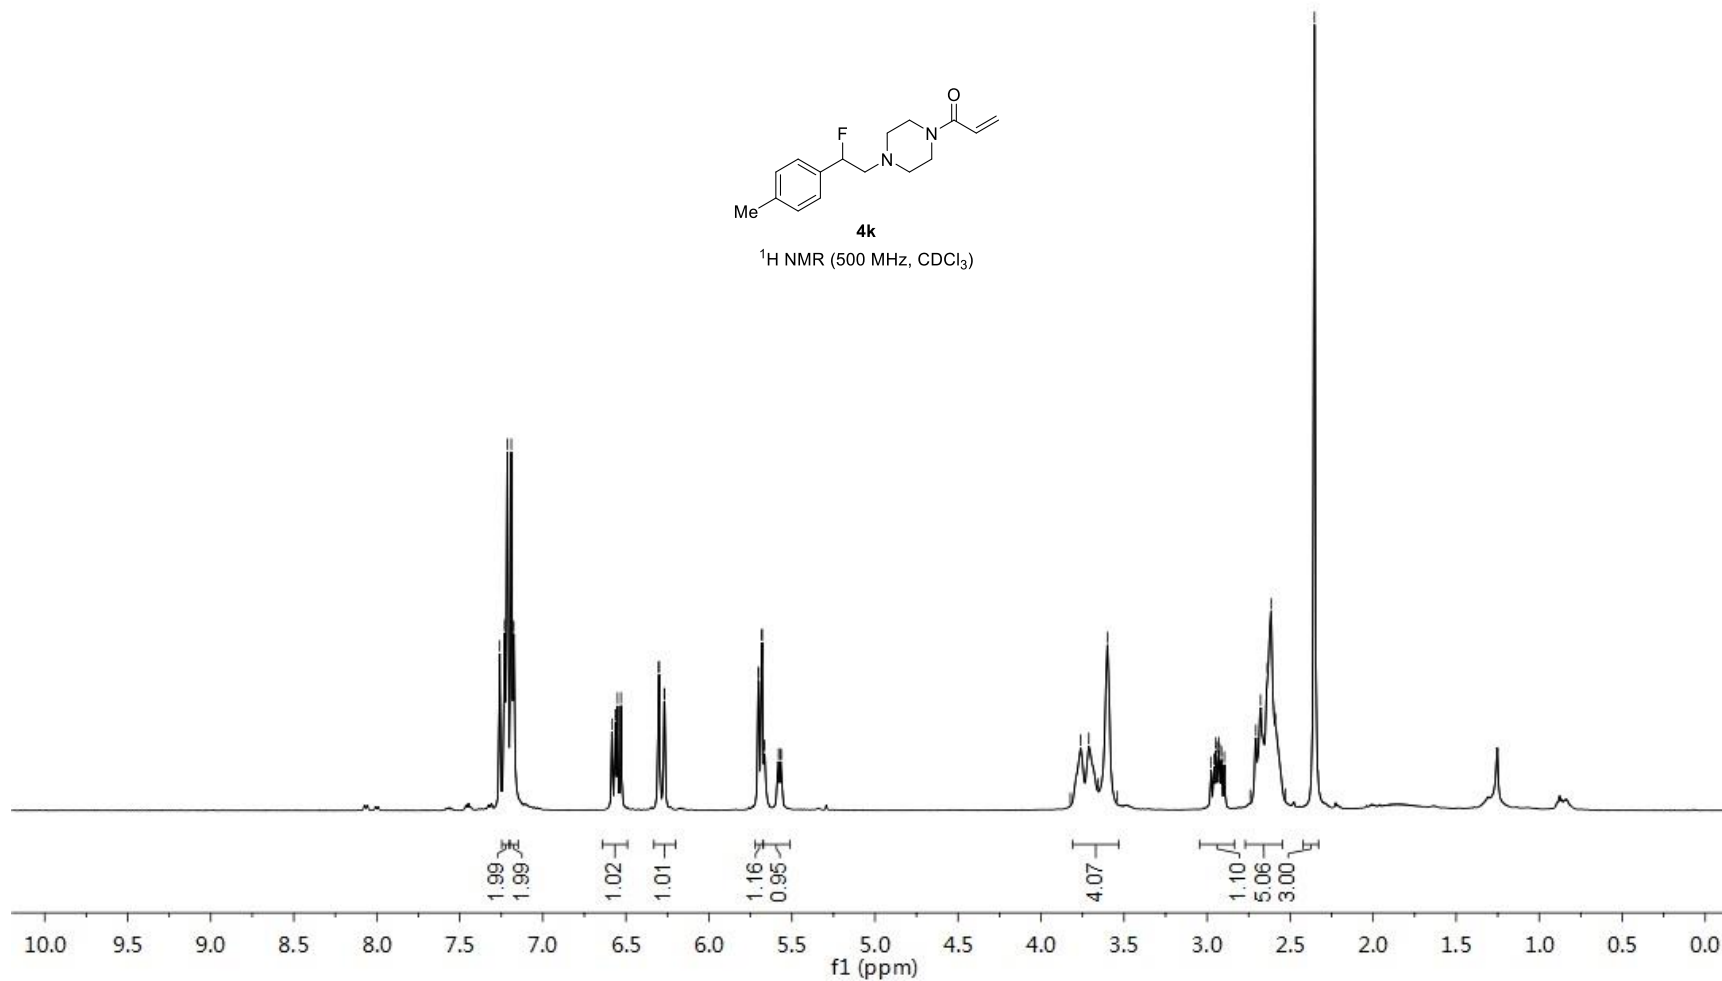

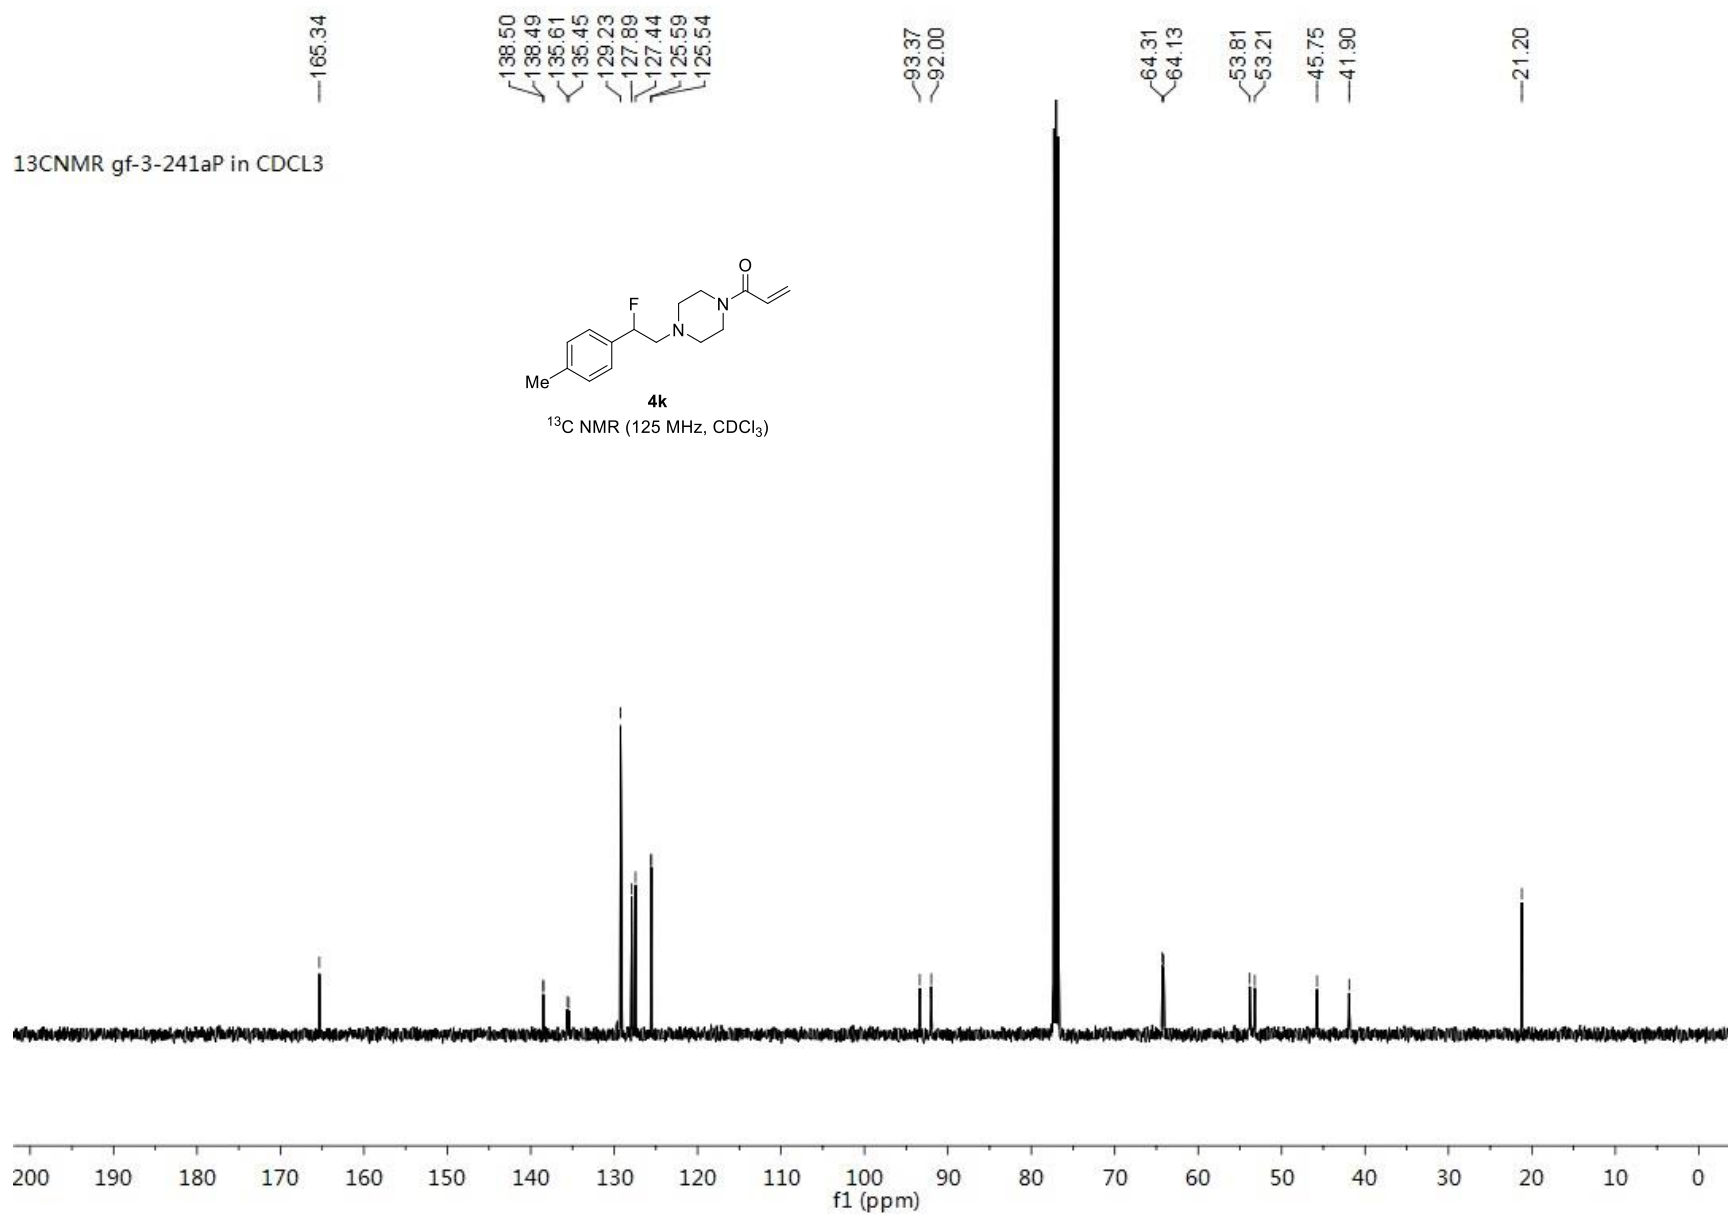



<sup>19</sup>F NMR gf-3-241aP in CDCl<sub>3</sub>

---175.1631

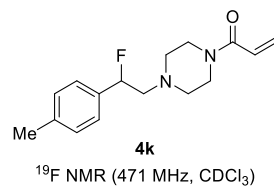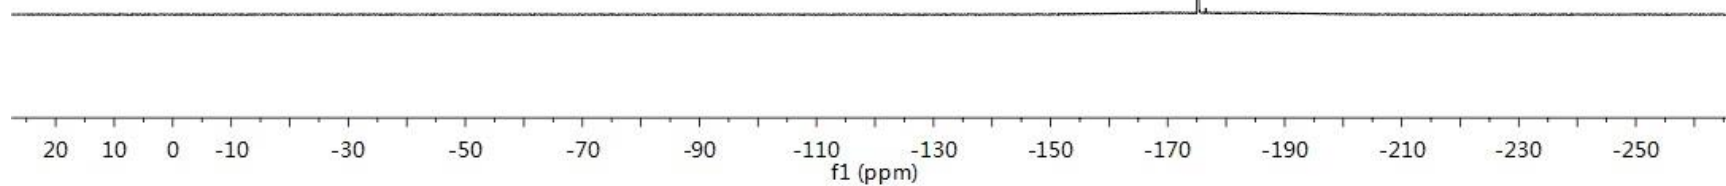

8.3103  
8.3008

7.2597  
7.2546  
7.2385  
7.1951  
7.1794

6.4912  
6.4818  
6.4723  
5.7260  
5.7235  
5.7095  
5.7064  
5.6290  
5.6259  
5.6117  
5.6092

3.8821  
3.8724  
3.8627

2.7200  
2.7154  
2.7106  
2.6974  
2.6874  
2.6769  
2.6663  
2.6554  
2.6466  
2.6339  
2.6233  
2.6188  
2.3568

<sup>1</sup>H NMR of 3-93cP in CDCl<sub>3</sub>

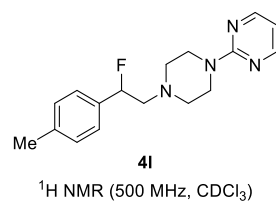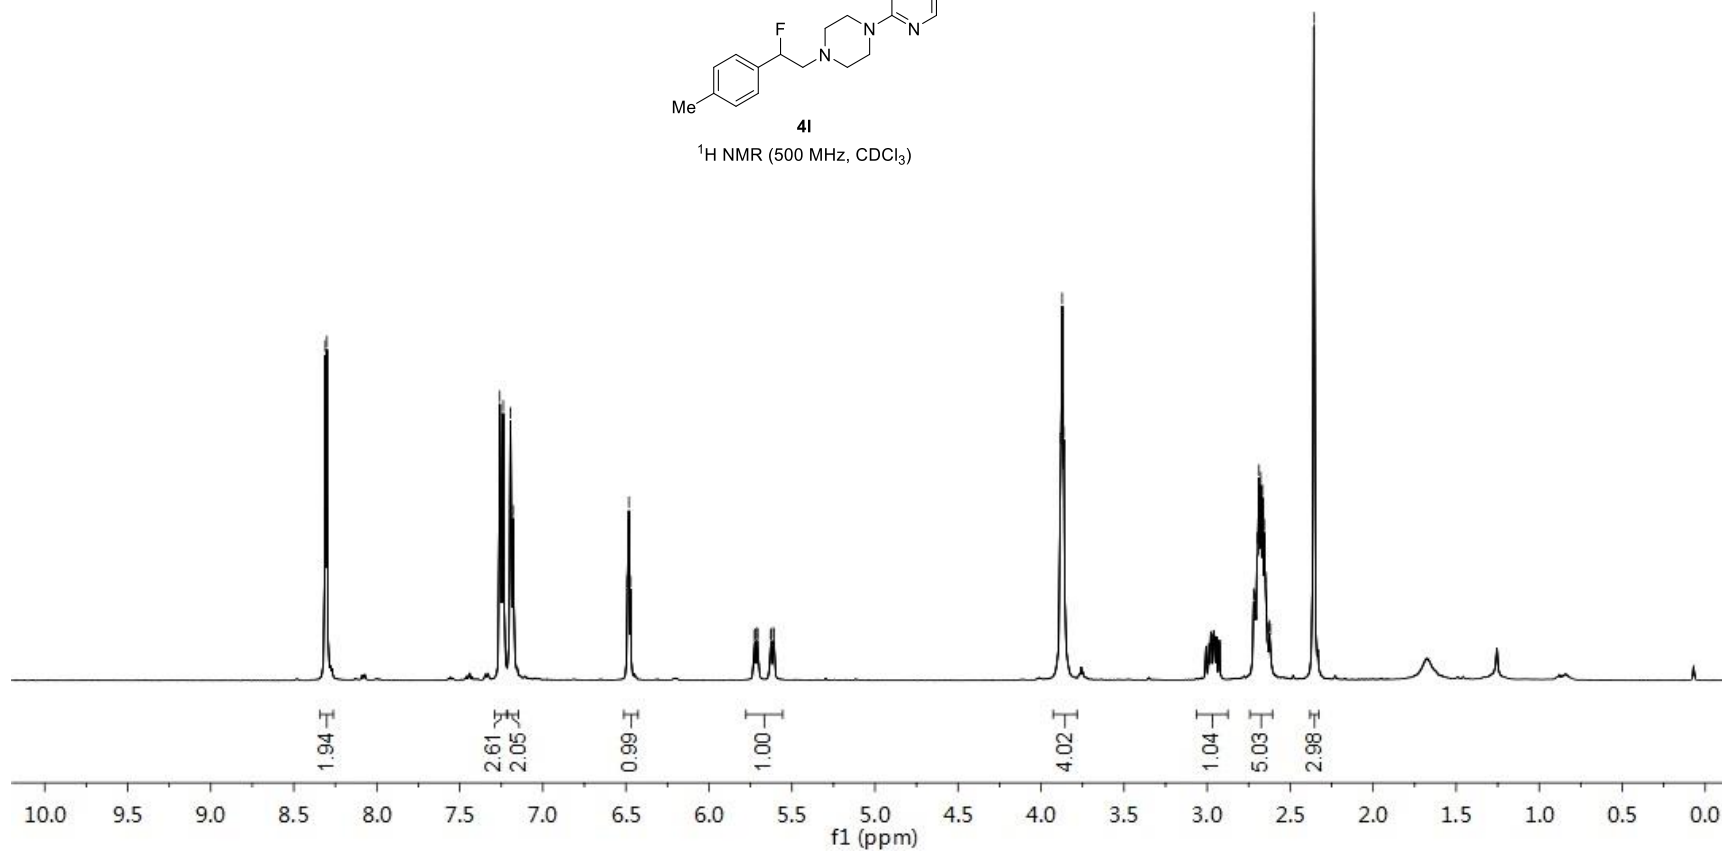

—161.69  
—157.73

138.37  
138.36  
135.90  
135.75  
129.20  
125.63  
125.58

—109.89

v

93.38  
92.00

64.75  
64.57

—53.54

—43.68

—21.20

<sup>13</sup>CNMR gf-3-93cP in CDCl<sub>3</sub>

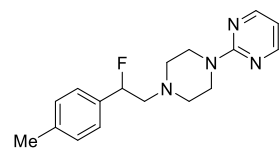

<sup>13</sup>C NMR (125 MHz, CDCl<sub>3</sub>)

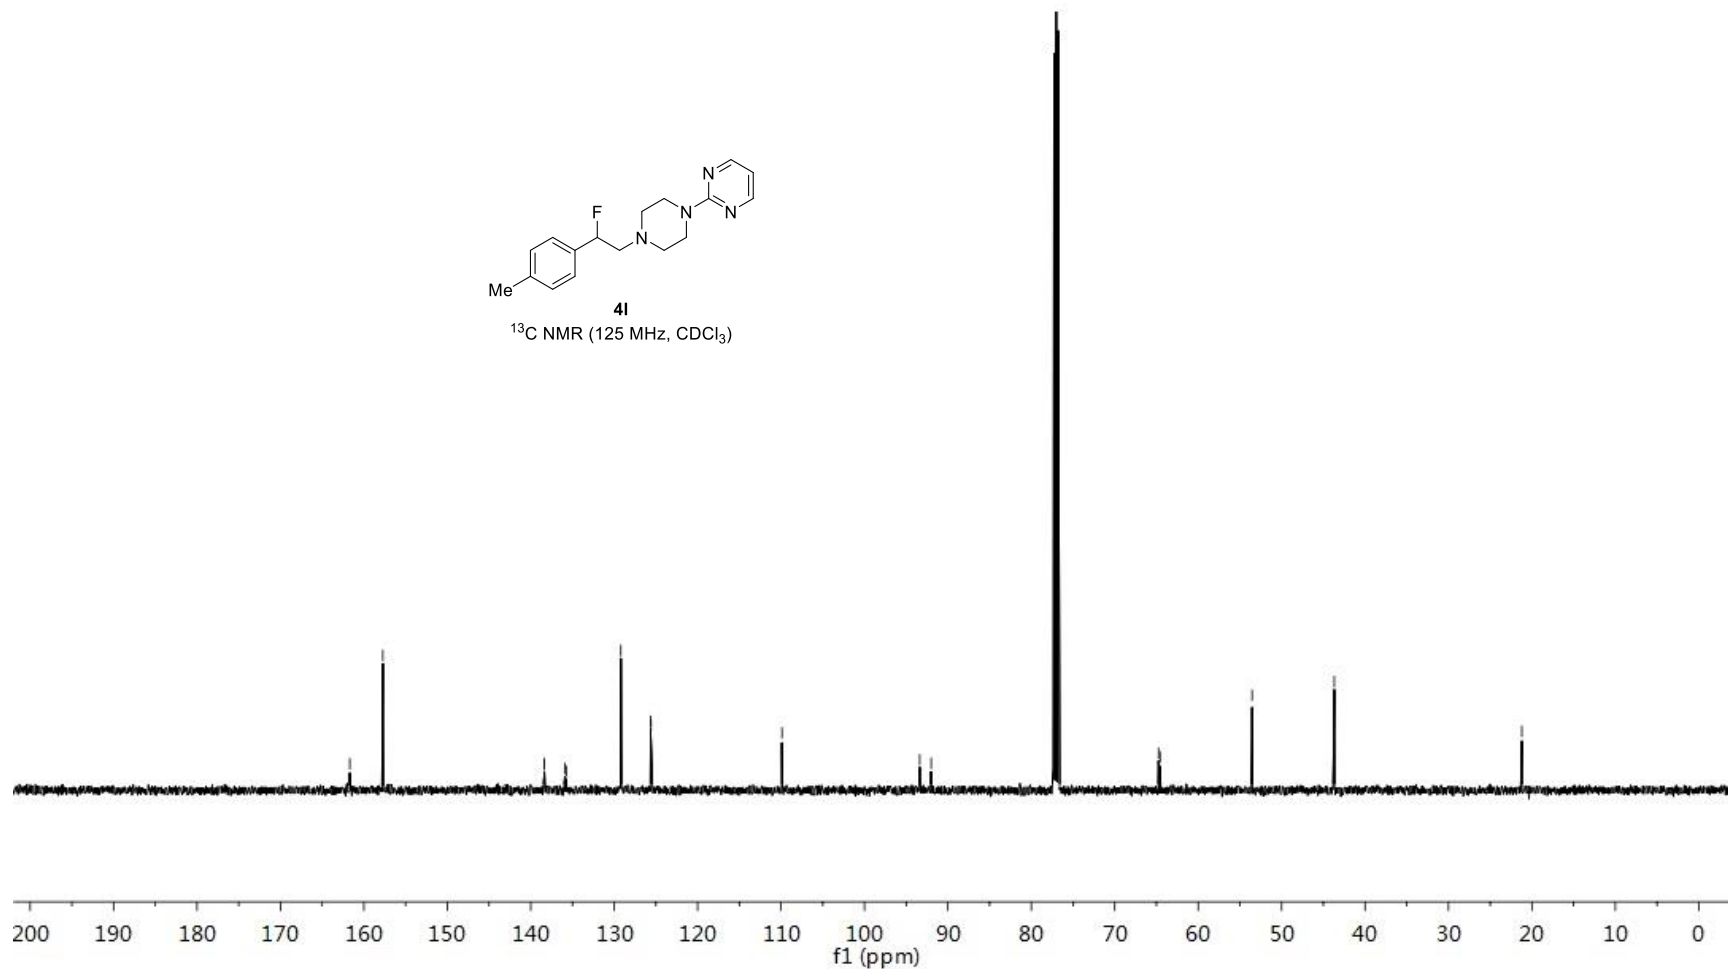

<sup>19</sup>F NMR gf-3-93cP in CDCl<sub>3</sub>

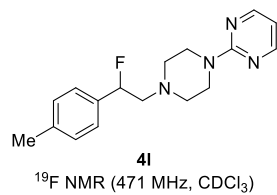

-175.1137

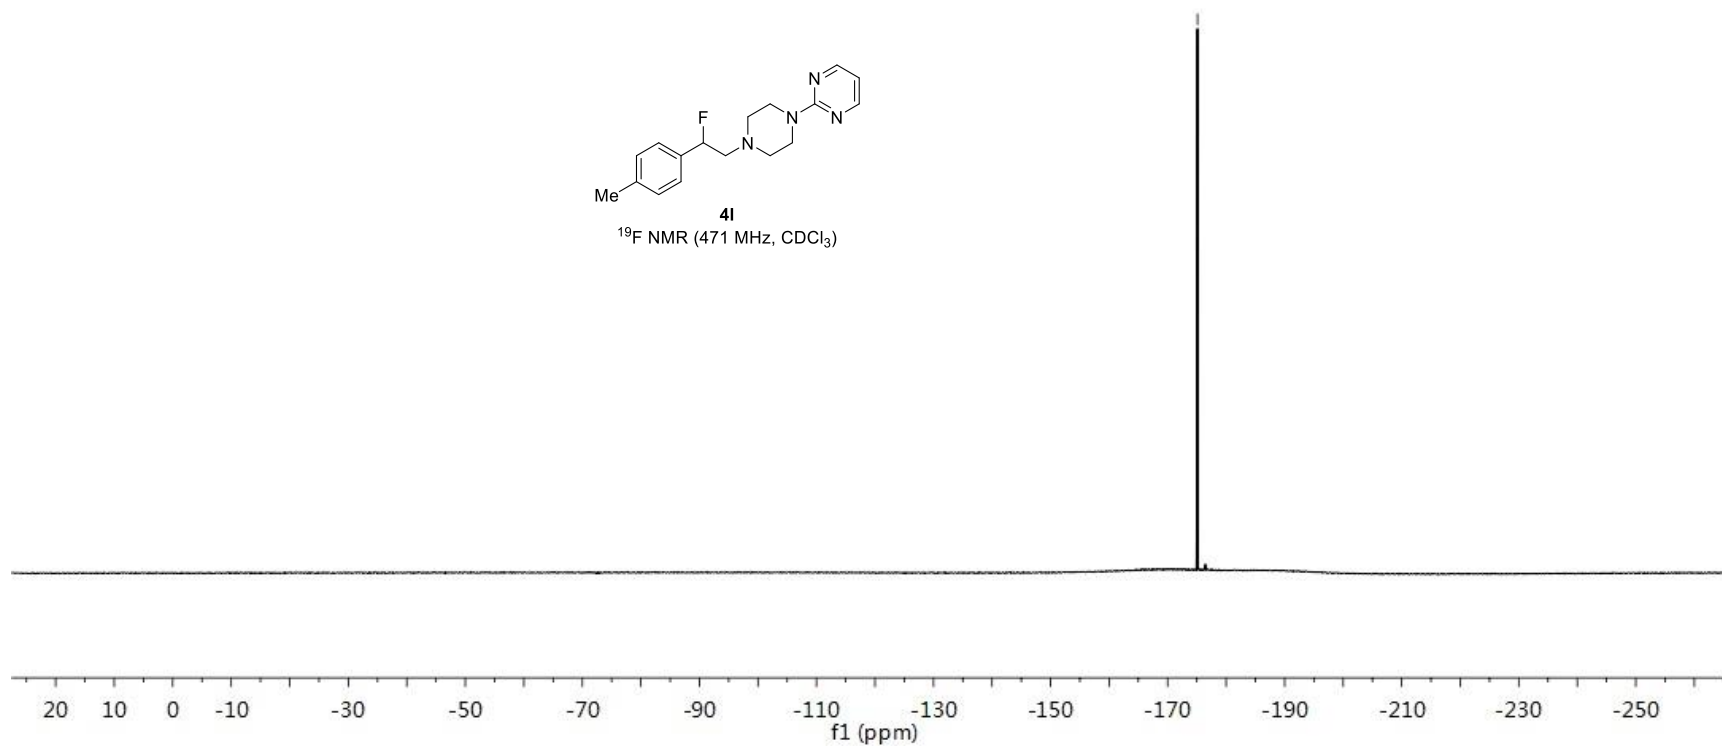

<sup>1</sup>H NMR of compound 4m in CDCl<sub>3</sub>

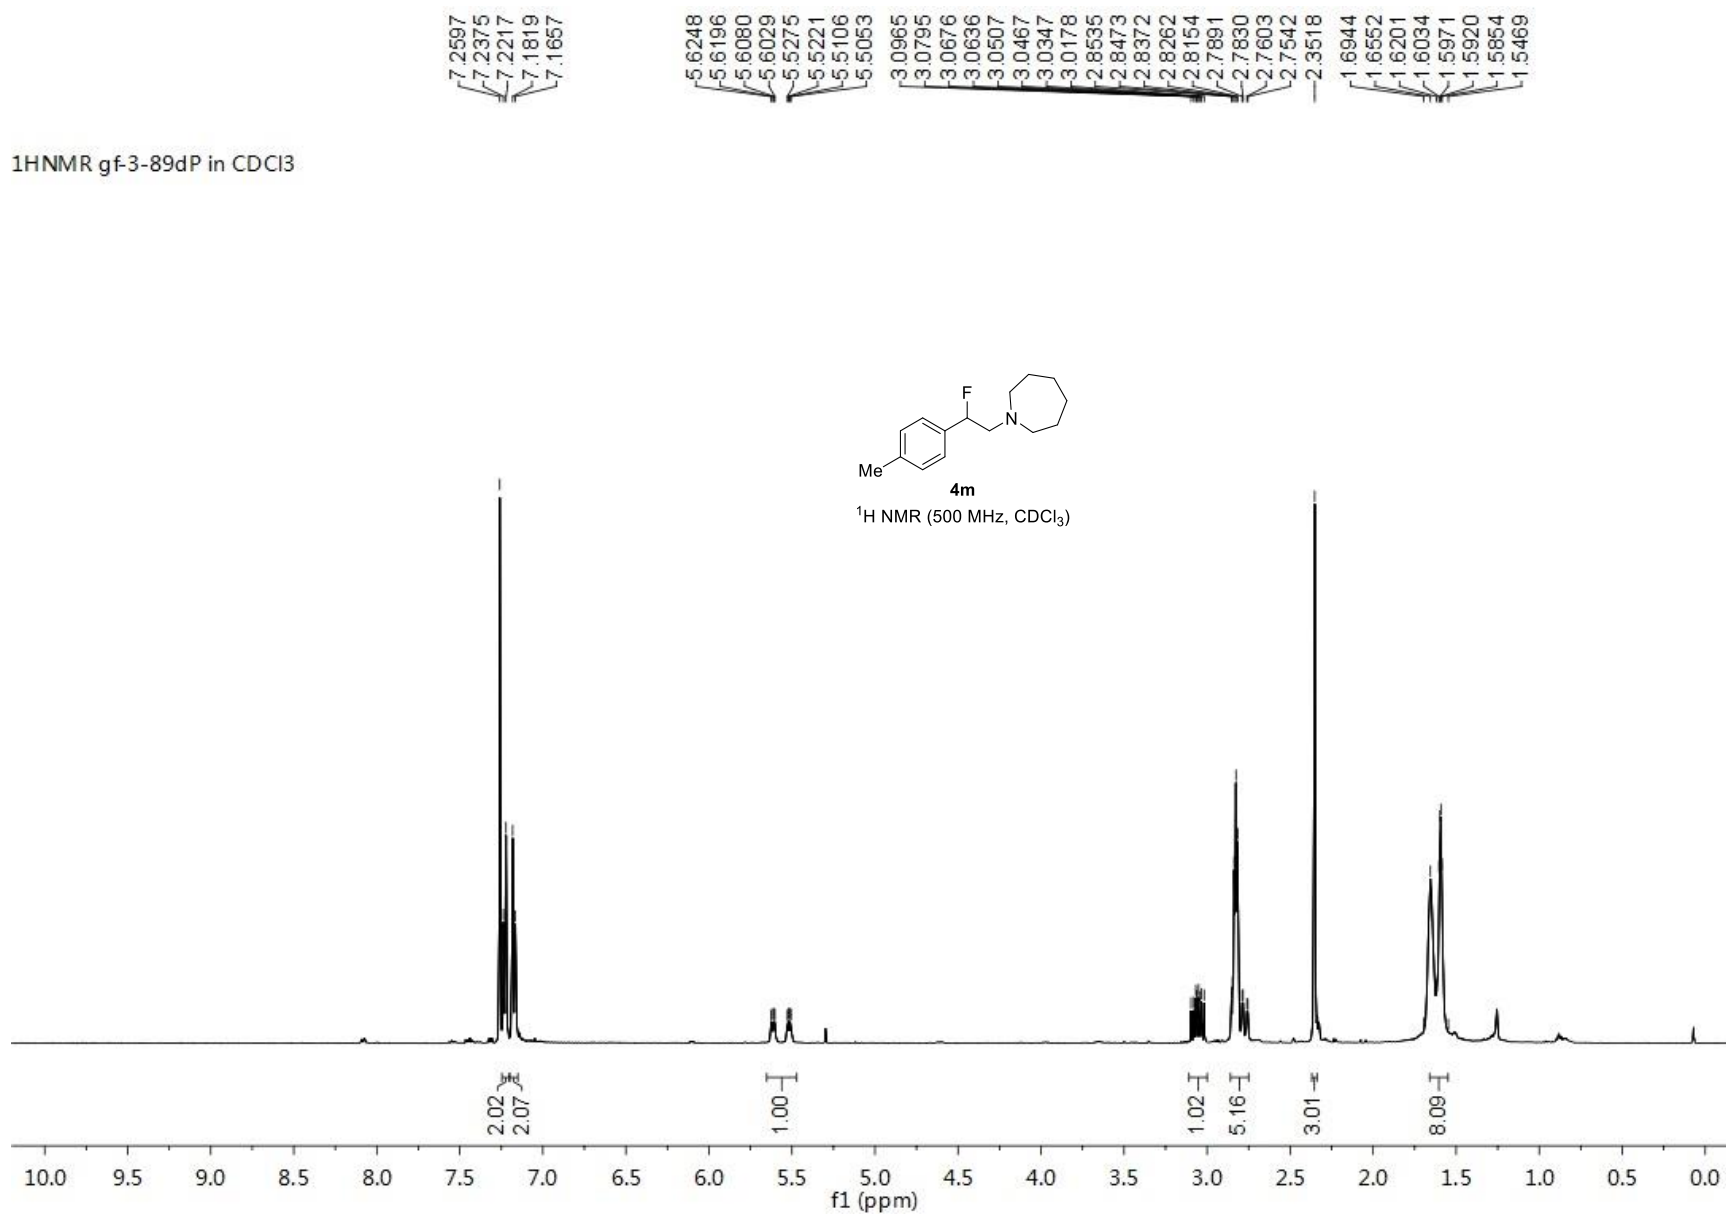

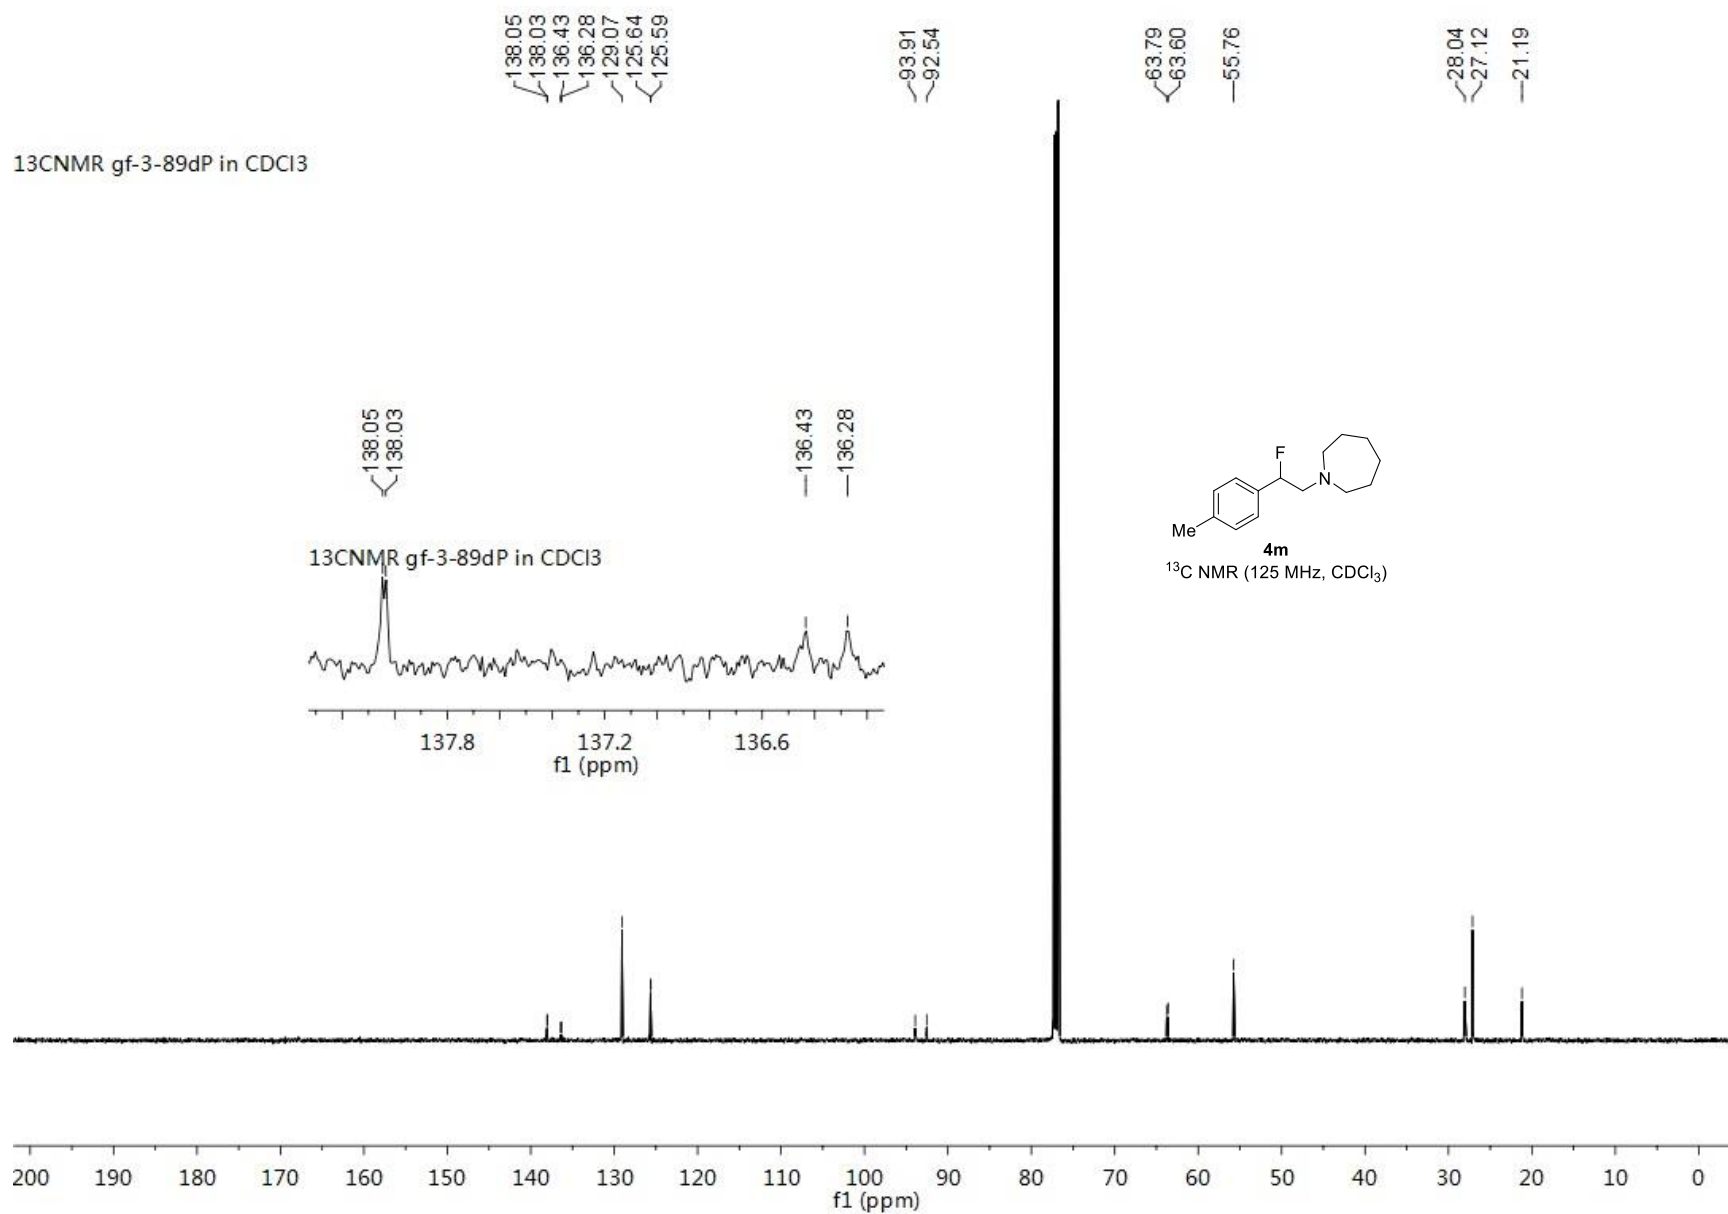

<sup>19</sup>F NMR gf-3-89dP in CDCl<sub>3</sub>

— -176.9541

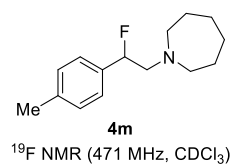

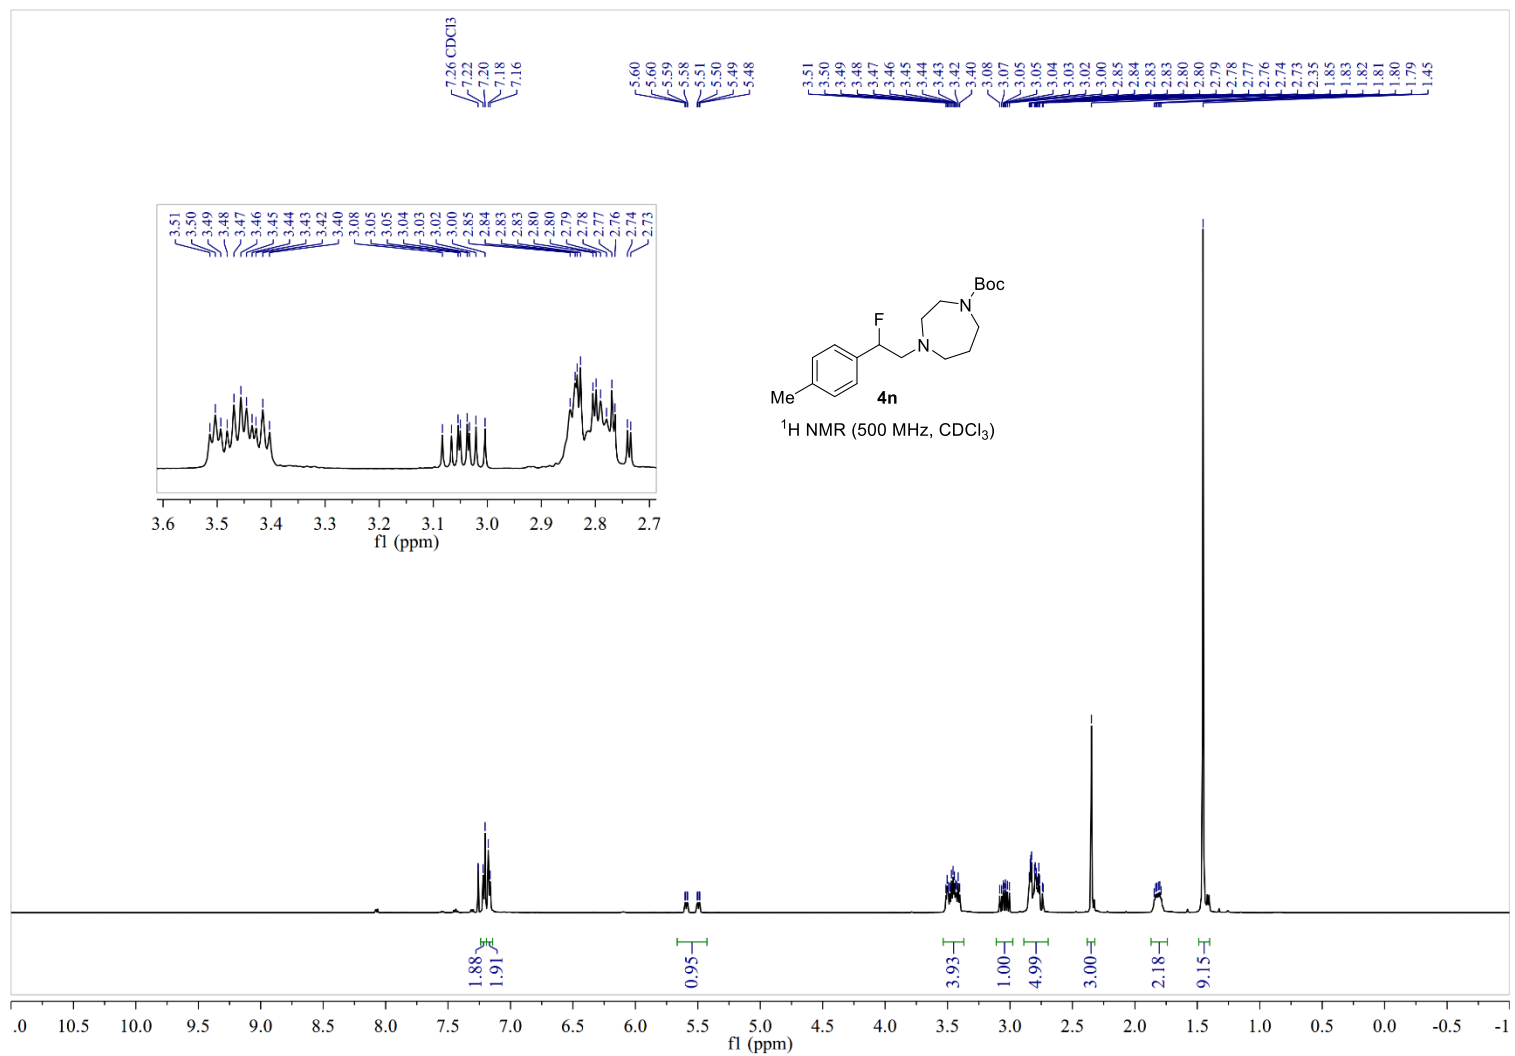



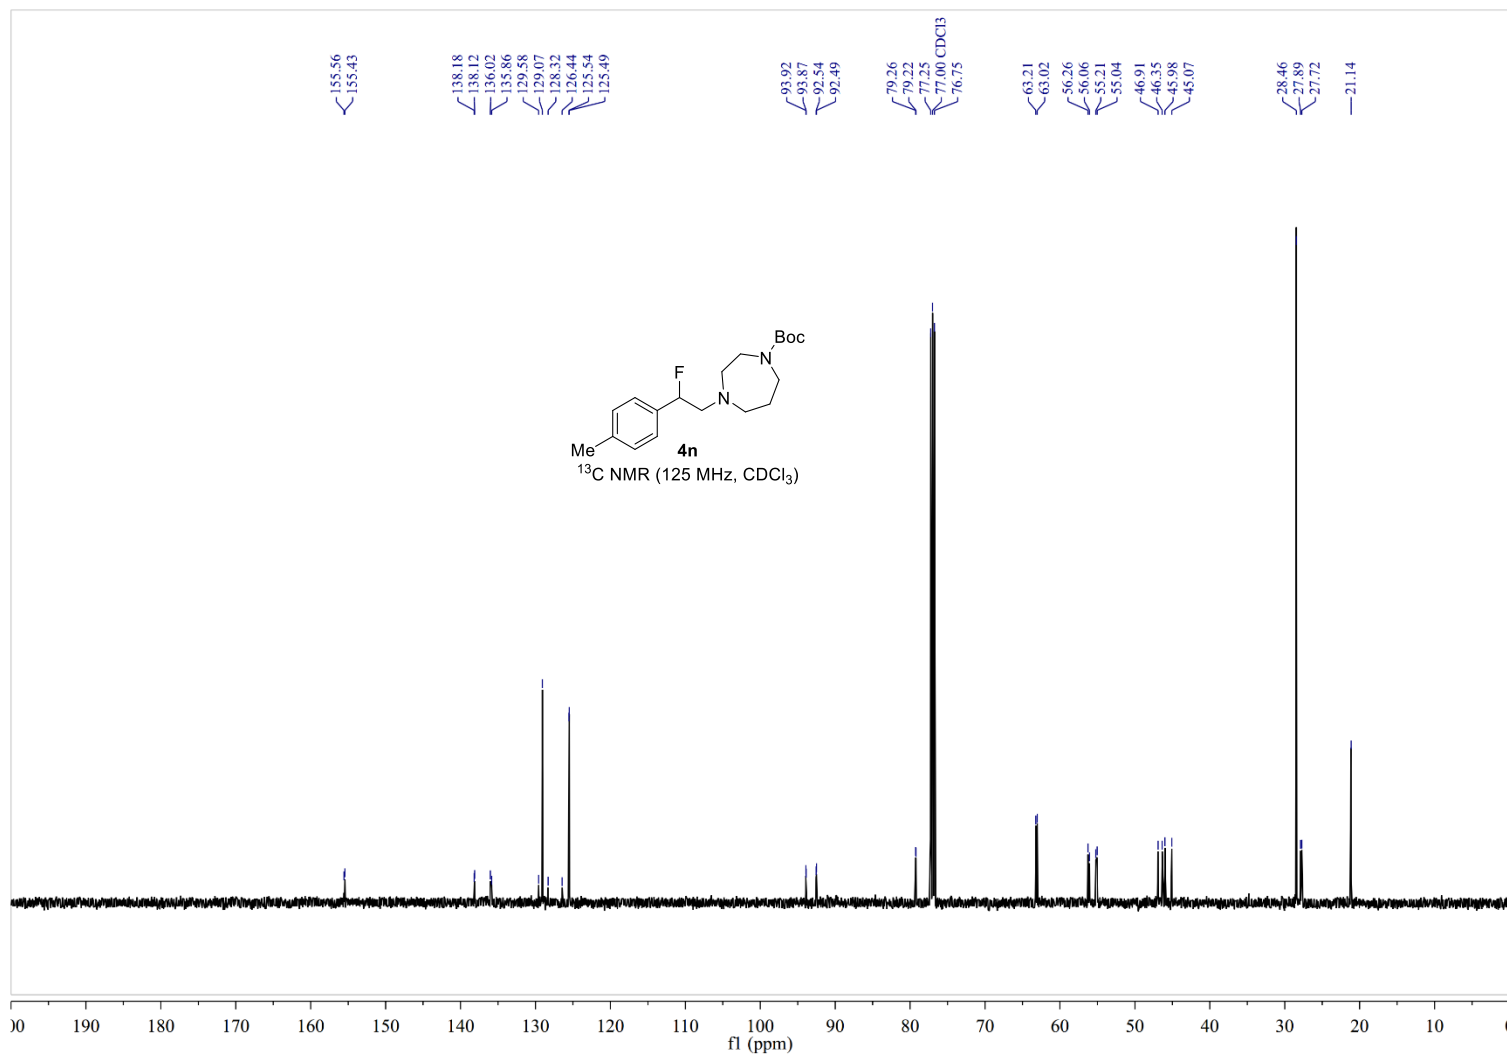

<sup>19</sup>F NMR of gf-ck-II-96dP in CDCl<sub>3</sub>

176.7485  
176.9494

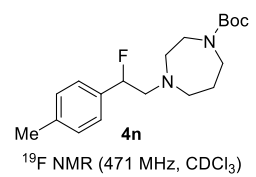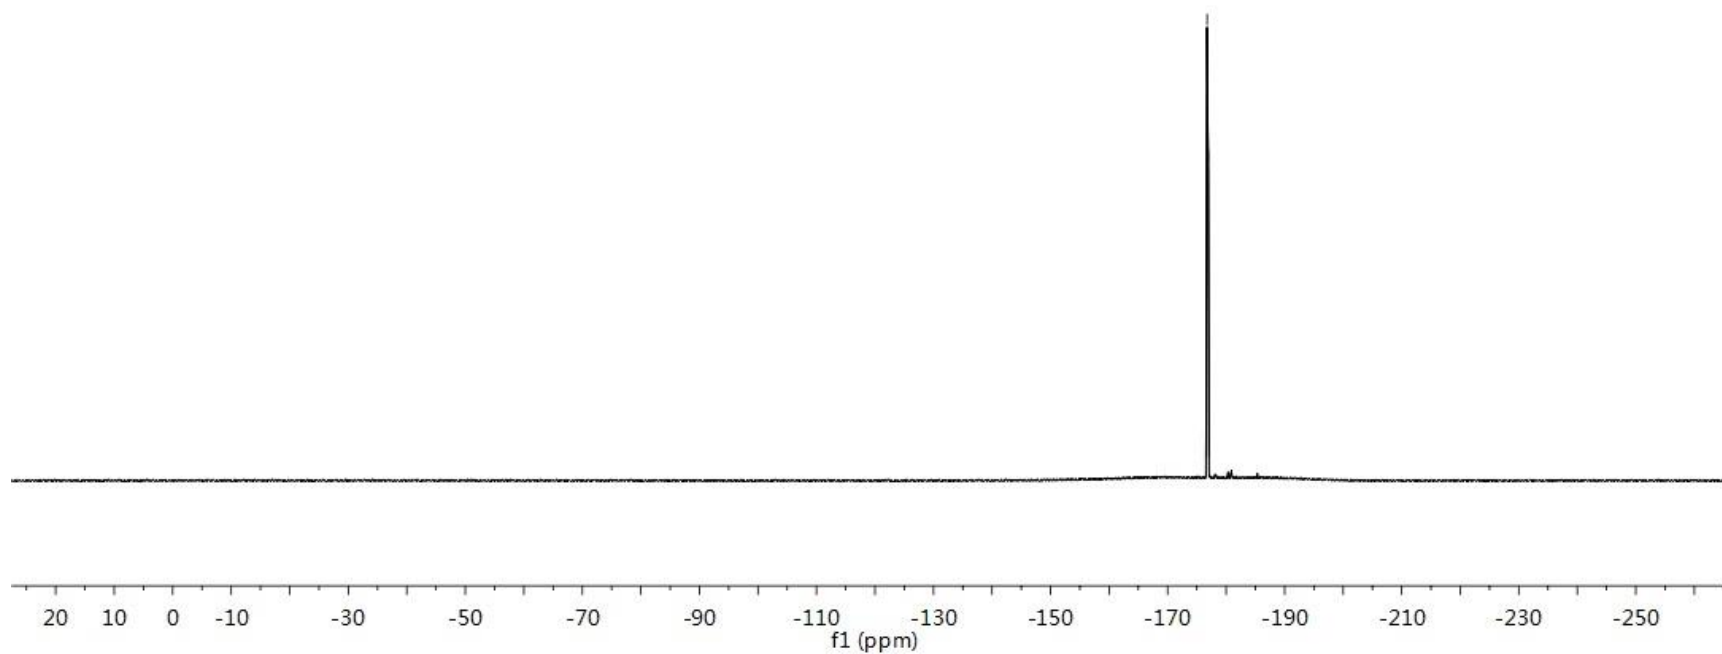

7.2602  
7.2393  
7.2236  
7.1862  
7.1704

5.6065  
5.6014  
5.5890  
5.5842  
5.5091  
5.5041  
5.4917  
5.4869

3.0232  
3.0059  
2.9938  
2.9897  
2.9765  
2.9724  
2.9602  
2.9429  
2.7558  
2.7503  
2.7264  
2.7204  
2.7031  
2.6922  
2.6890  
2.6783  
2.6750  
2.6606  
2.6344  
2.3540  
1.0745  
1.0602  
1.0460

<sup>1</sup>H NMR gf-3-86aP recol in CDCl<sub>3</sub>

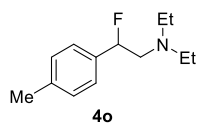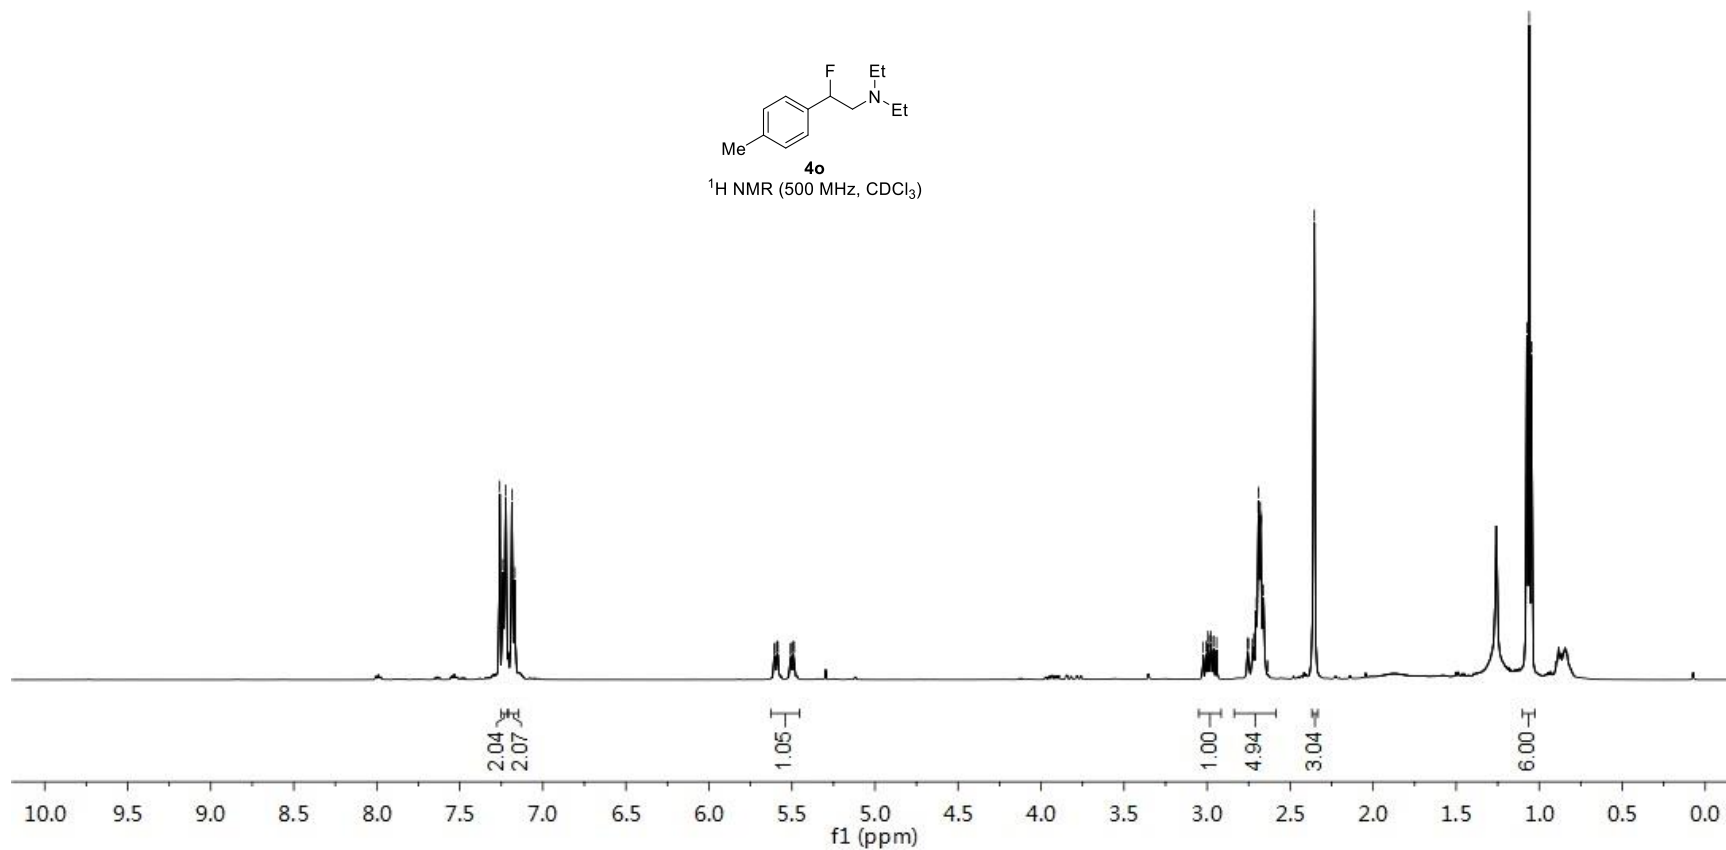

<sup>13</sup>CNMR gf-3-86aP recol in CDCl<sub>3</sub>

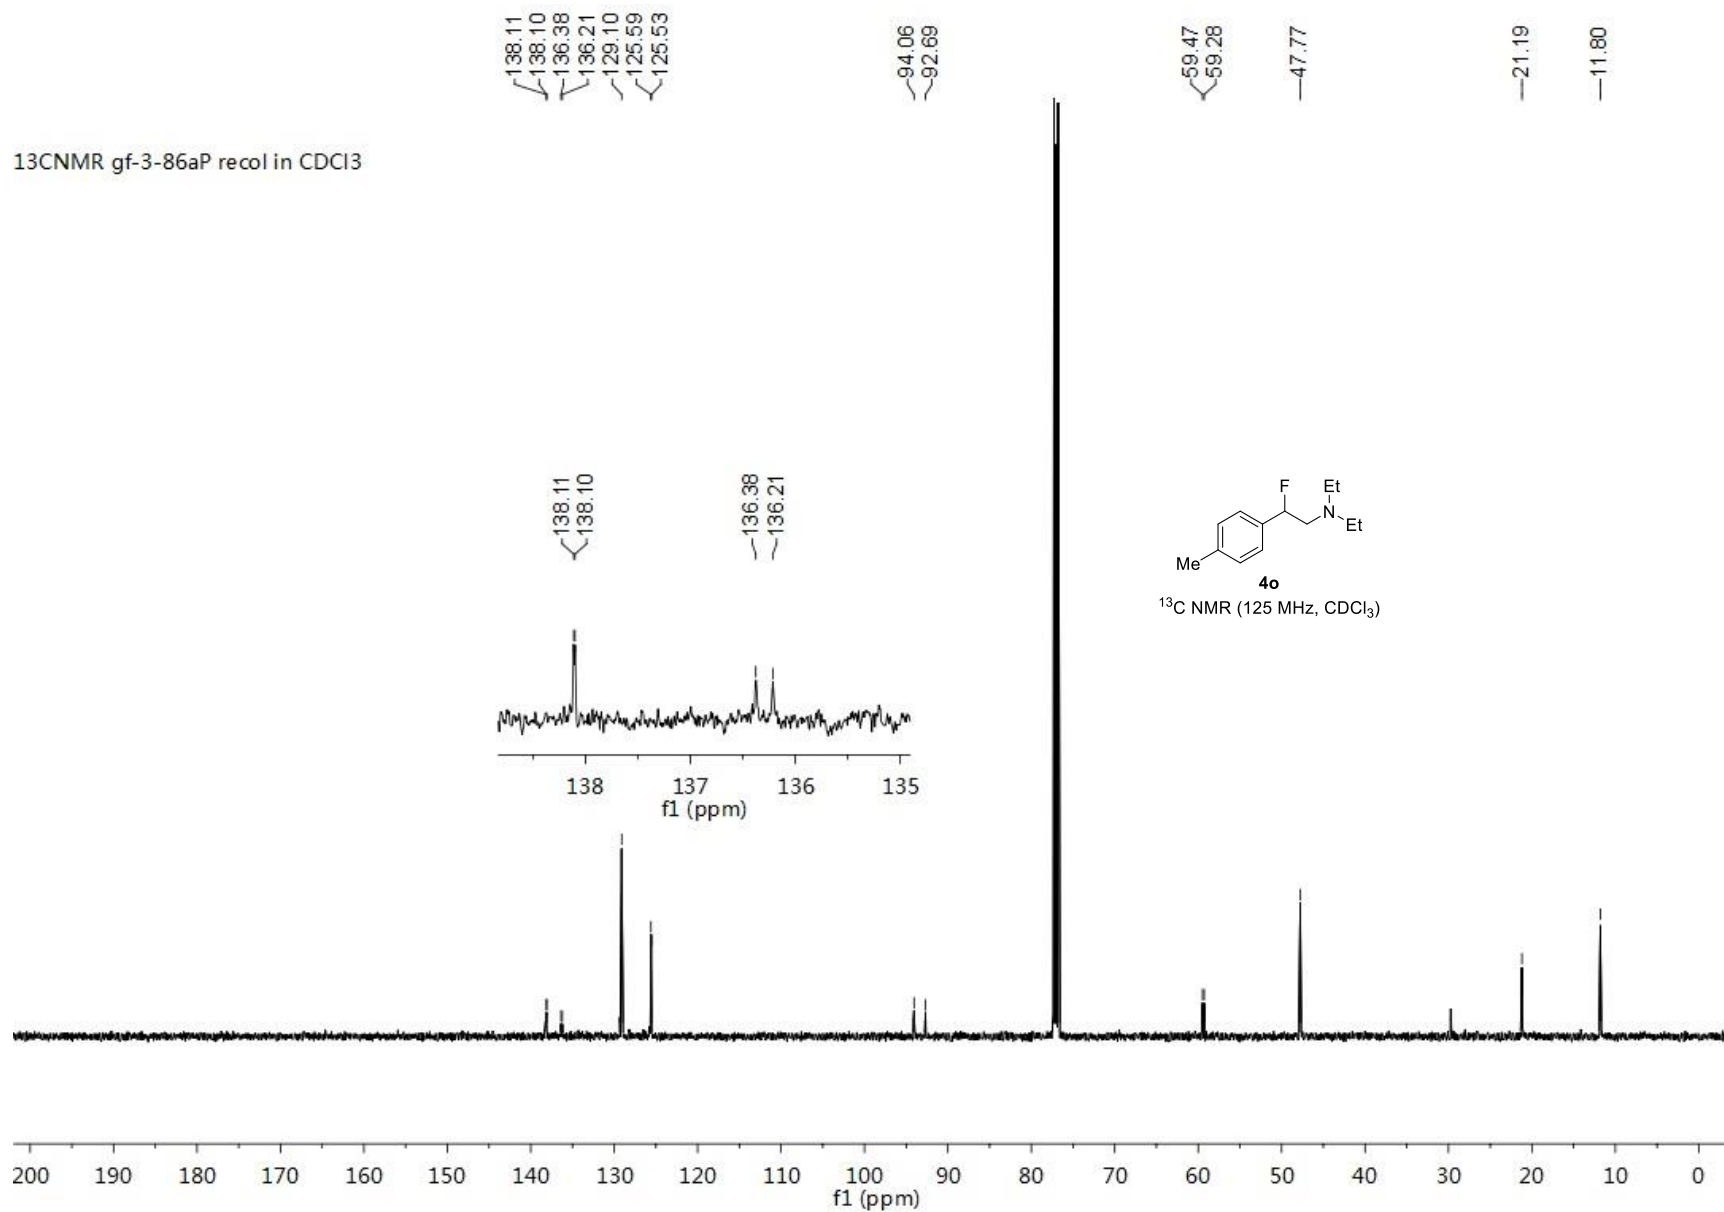

<sup>19</sup>F NMR gf-3-86aP1 in CDCl<sub>3</sub>

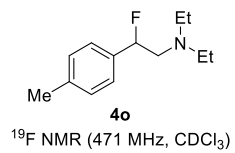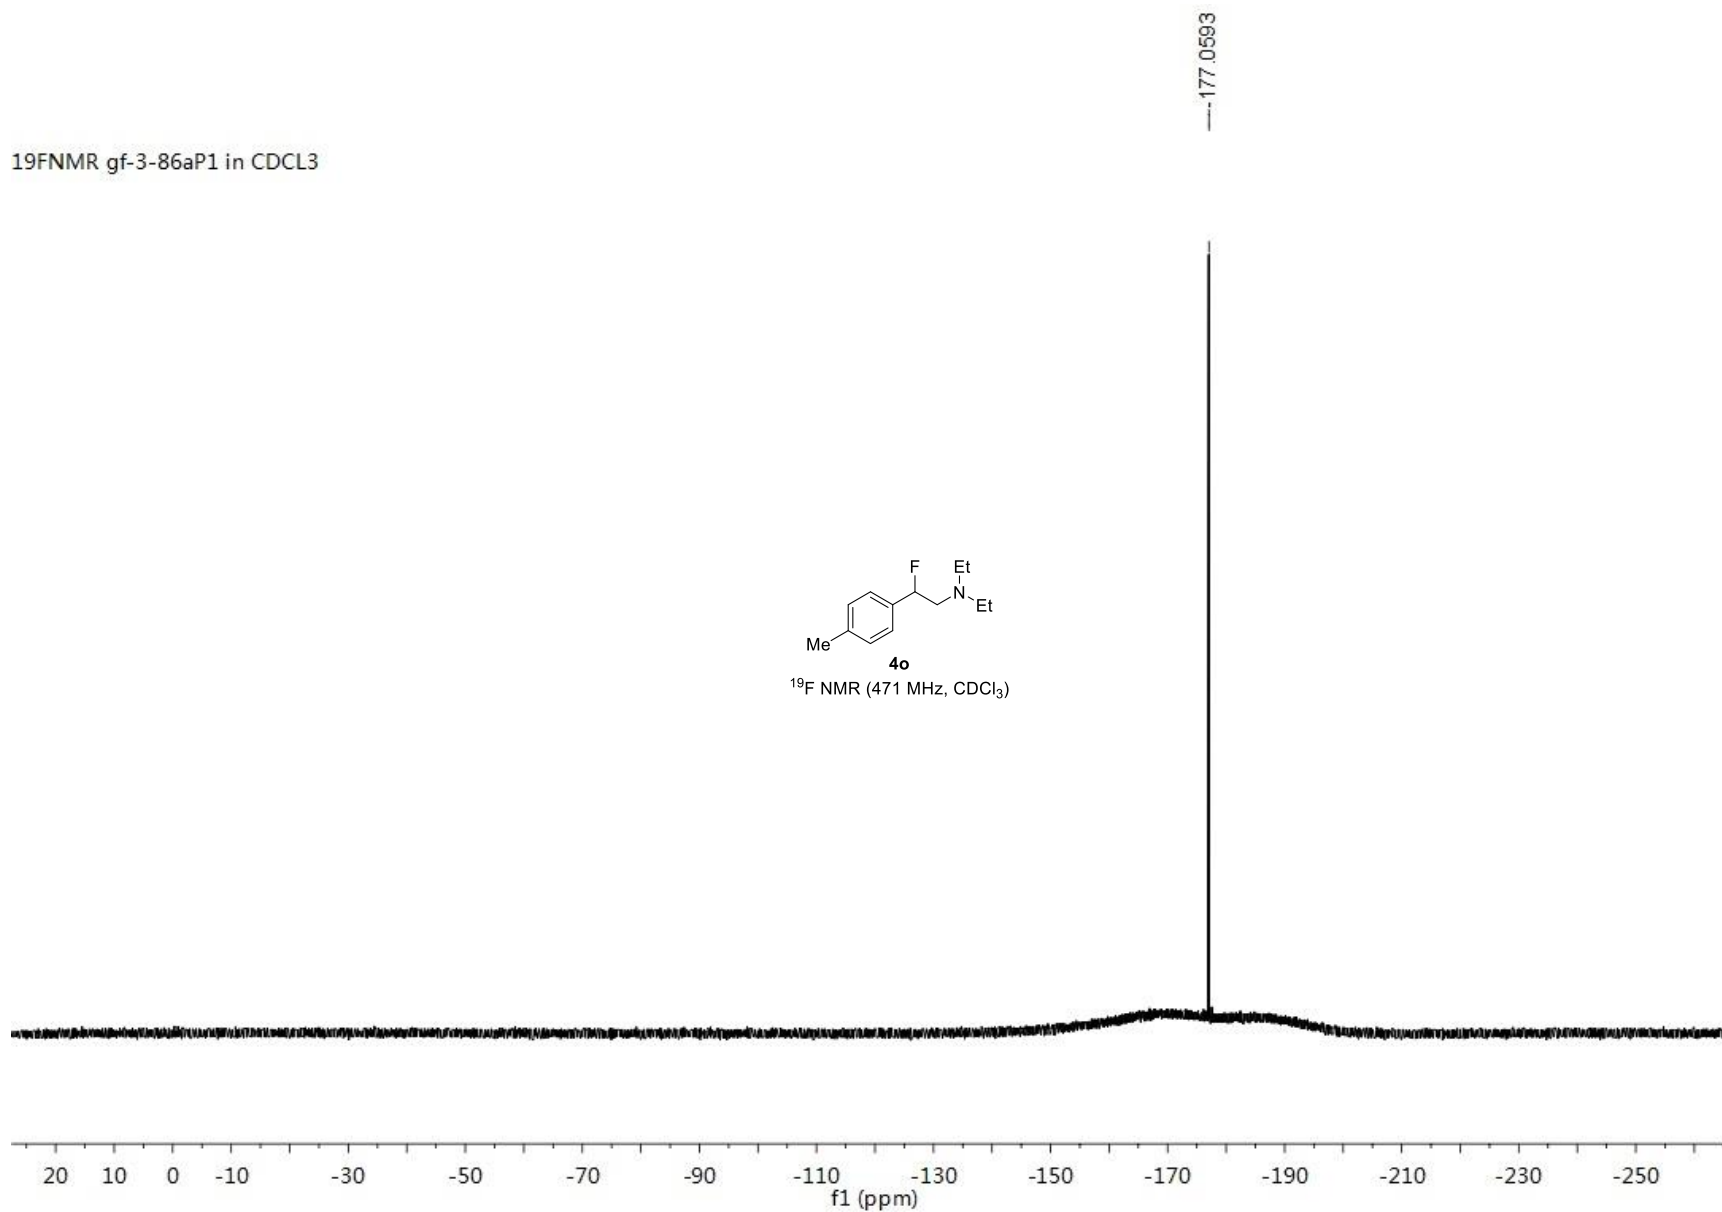

7.3029  
7.2871  
7.2780  
7.2725  
7.2605  
7.2359  
7.2195  
7.2032  
7.2000  
7.1942  
7.1883  
7.1787

5.6491  
5.6436  
5.6319  
5.6265  
5.5518  
5.5462  
5.5346  
5.5290

3.0525  
3.0352  
3.0239  
3.0194  
3.0066  
3.0021  
2.9908  
2.9735  
2.8293  
2.8199  
2.8139  
2.8064  
2.7990  
2.7934  
2.7856  
2.7804  
2.7750  
2.7649  
2.7596  
2.7502  
2.7362  
2.7305  
2.6991  
2.6934  
2.6706  
2.6649  
2.4812  
2.3635

<sup>1</sup>H NMR of **4p** in CDCl<sub>3</sub>

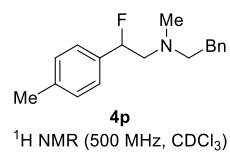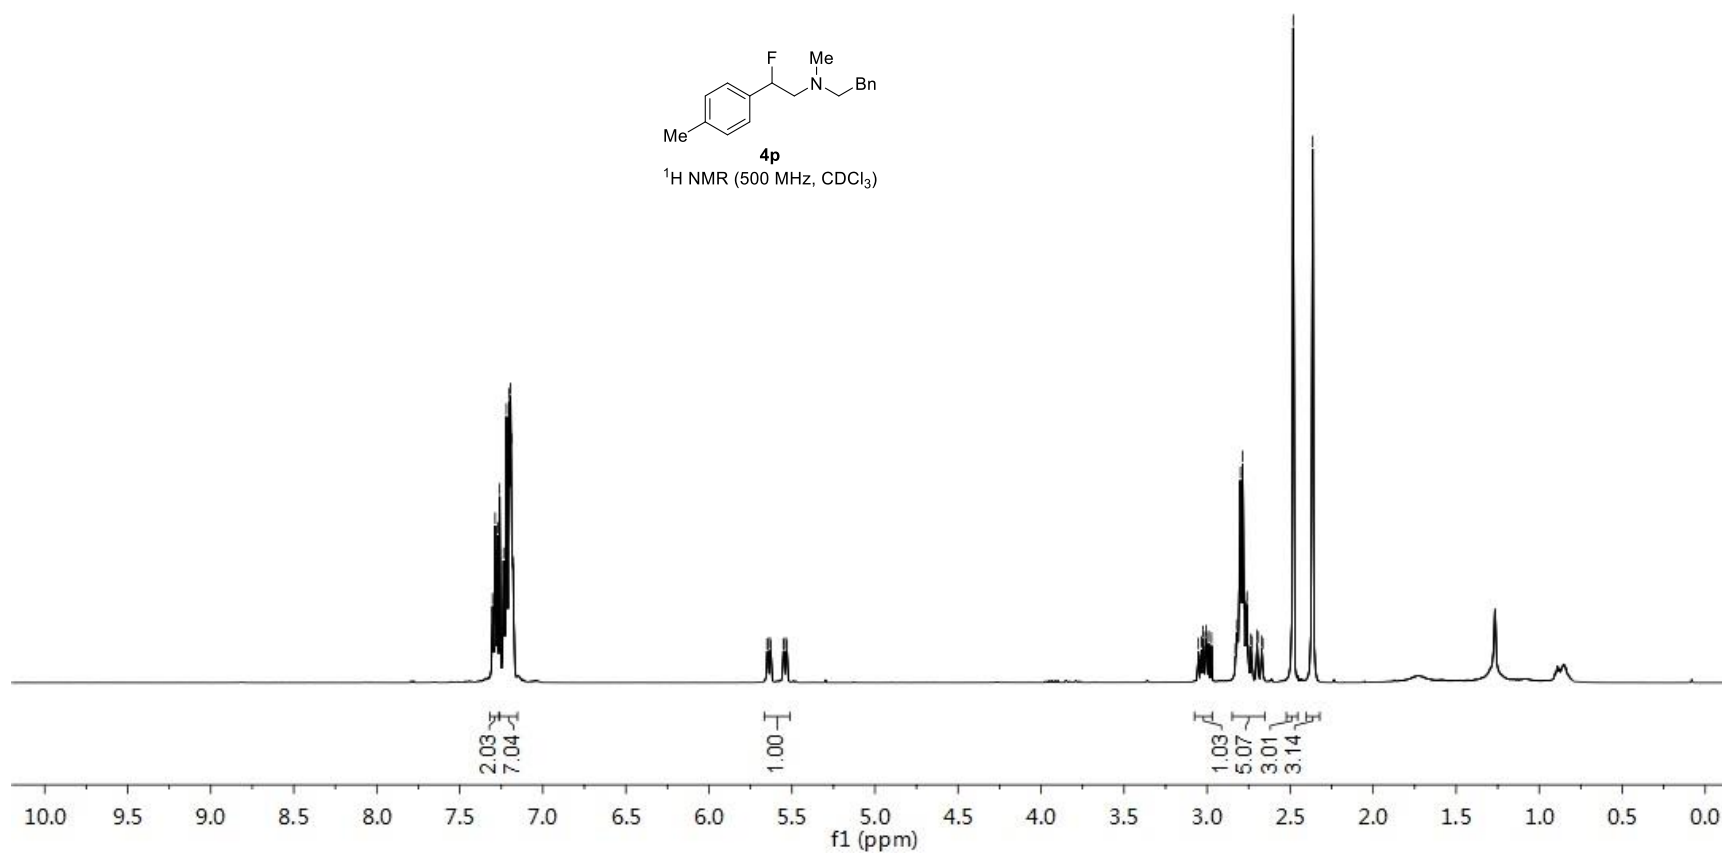

<sup>13</sup>CNMR gf-3-85dP in CDCl<sub>3</sub>

140.30  
138.24  
138.22  
136.11  
135.96  
129.16  
128.74  
128.41  
126.03  
125.63  
125.58

93.57  
92.20

63.54  
63.35  
59.96

42.89

33.79

21.21

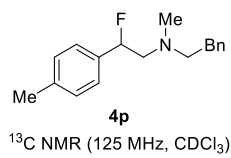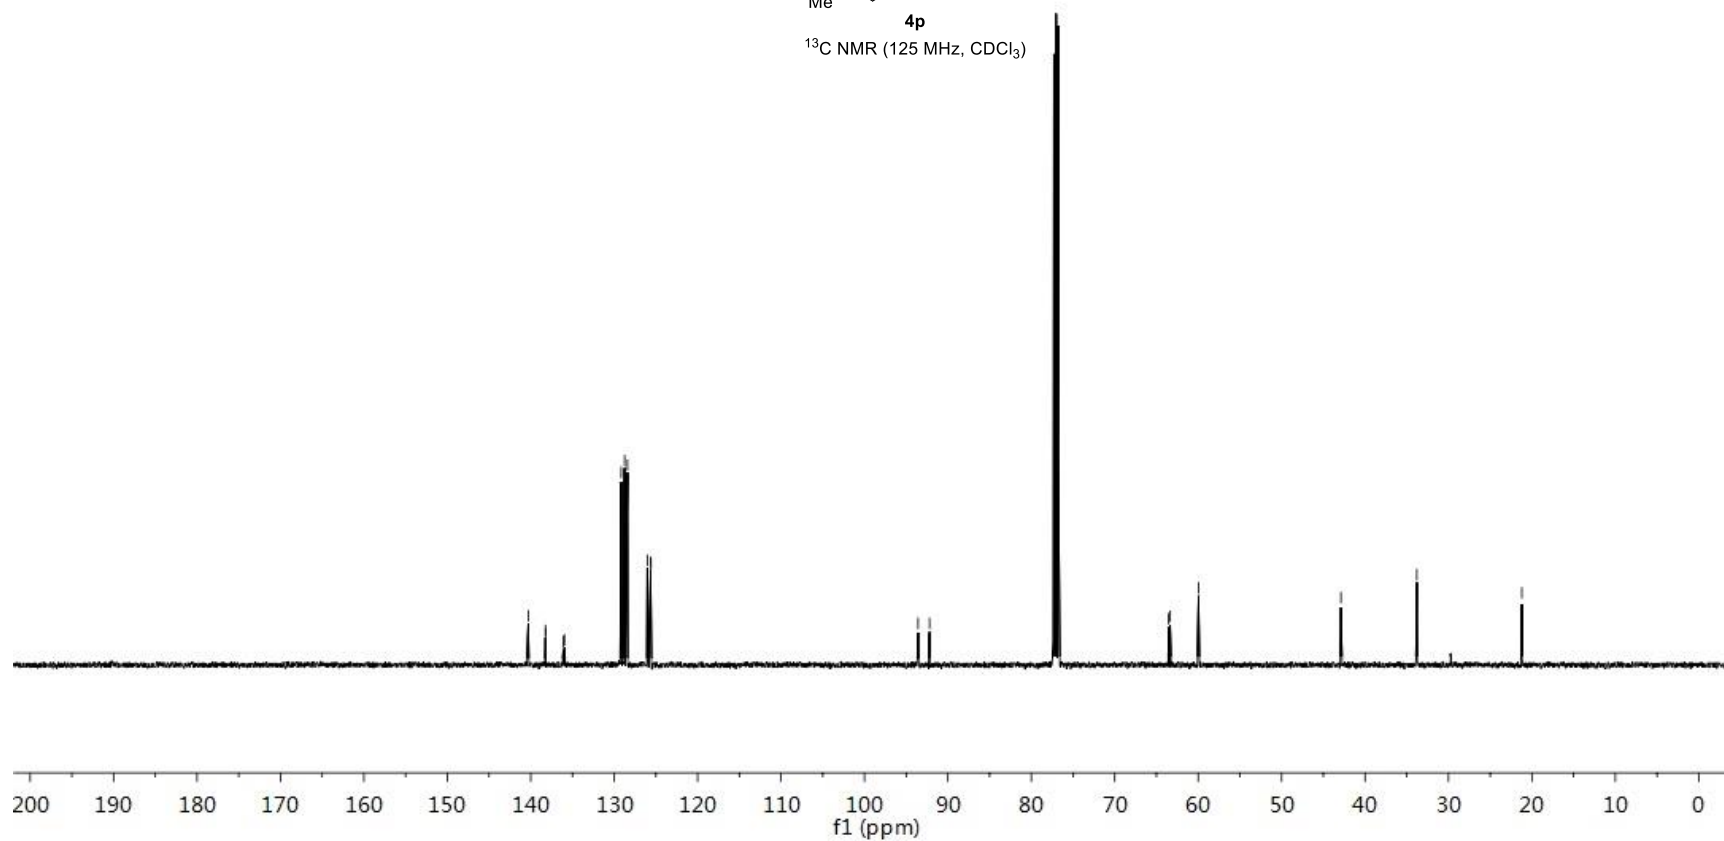

<sup>19</sup>F NMR gf-3-85dP in CDCl<sub>3</sub>

---176.4063

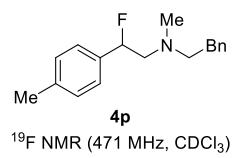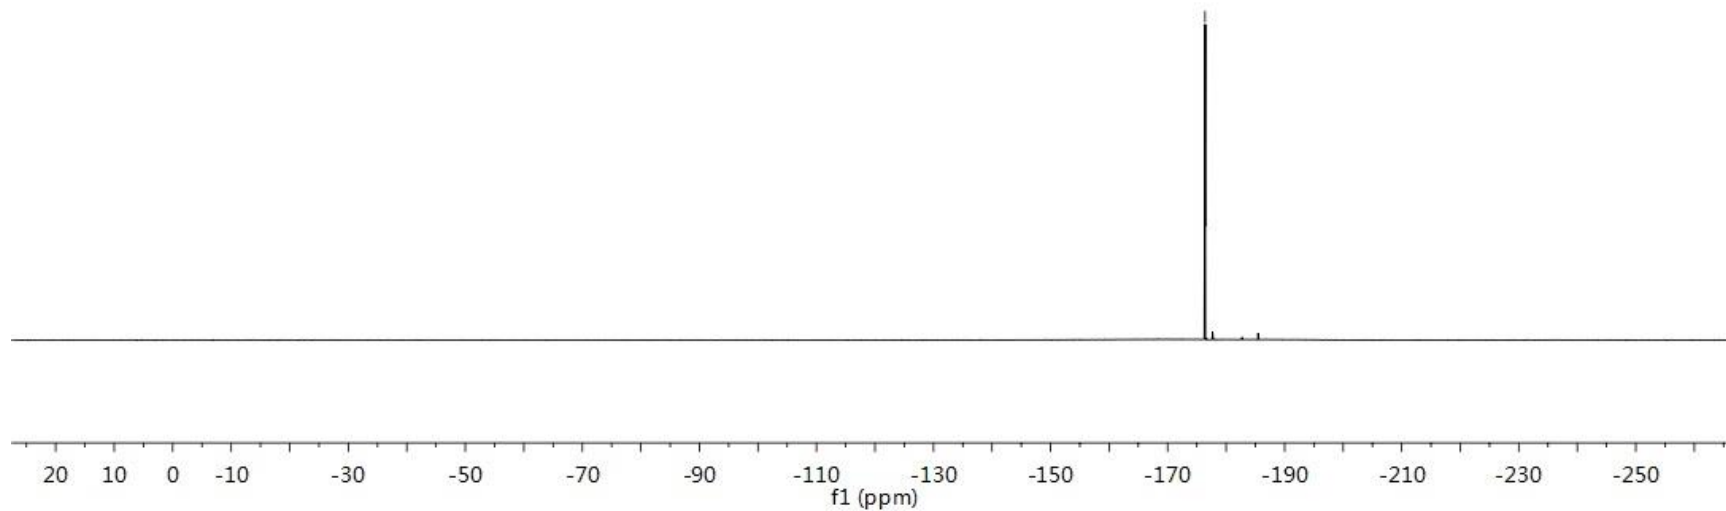



<sup>1</sup>H NMR of gf-3-98aPPPP in CDCl<sub>3</sub>

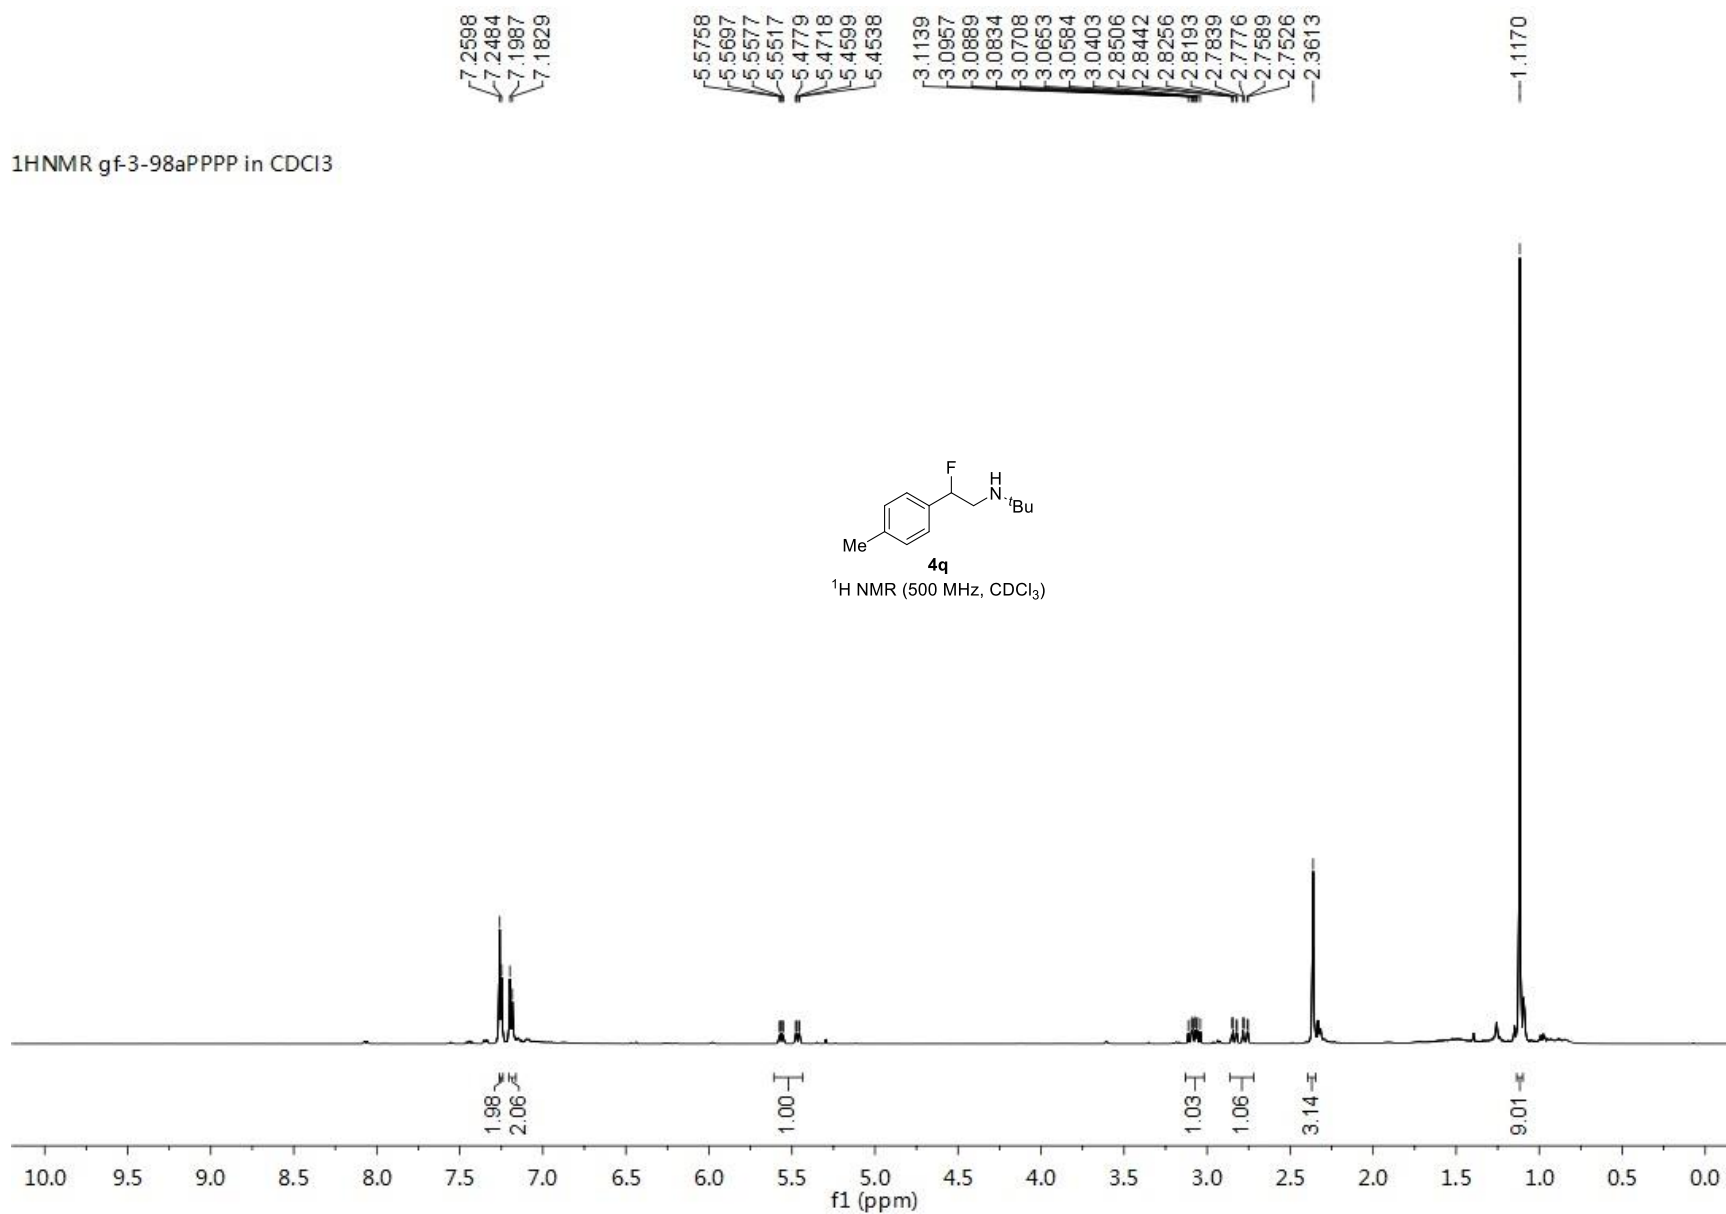

<sup>13</sup>CNMR gf-3-98aPPPP in CDCl<sub>3</sub>

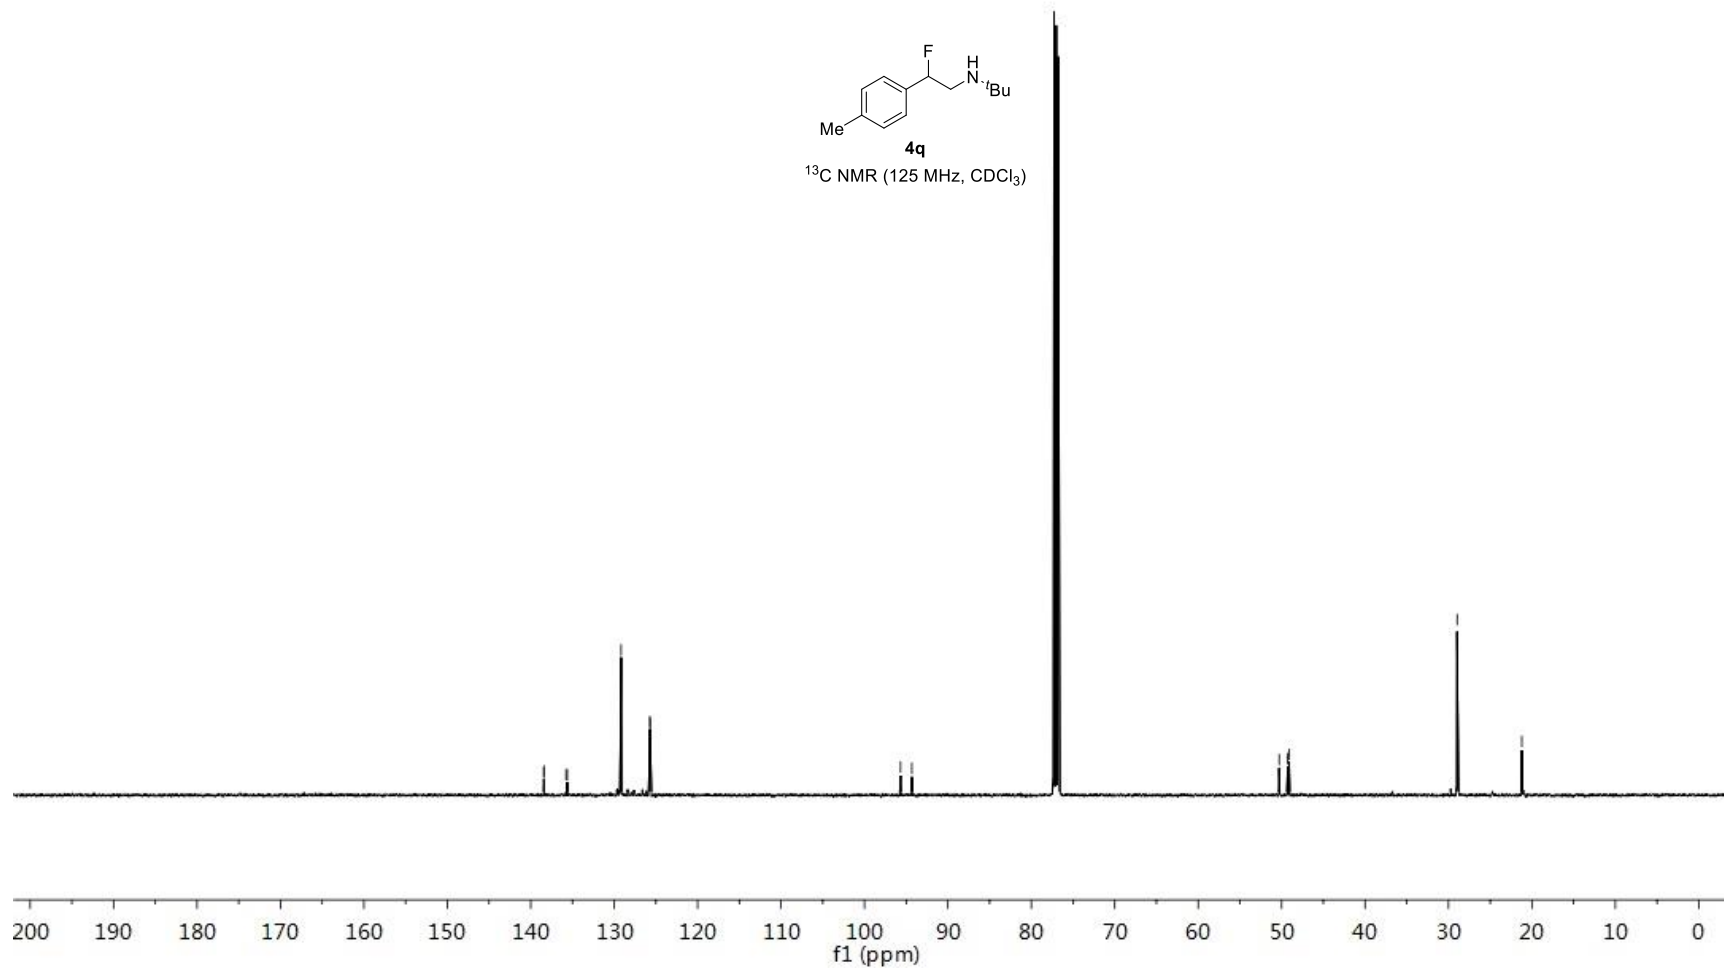

<sup>19</sup>F NMR gf-3-98aPPPP in CDCl<sub>3</sub>

— 180.1432

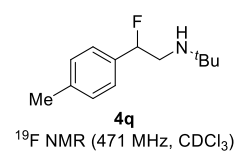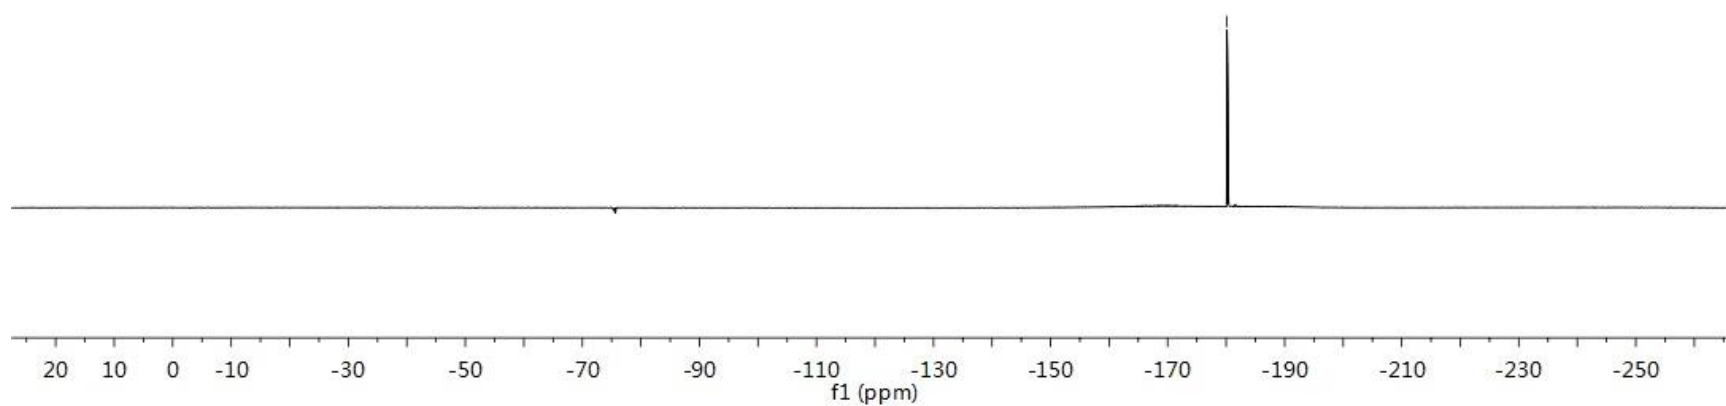

<sup>1</sup>H NMR of compound 4r in CDCl<sub>3</sub>

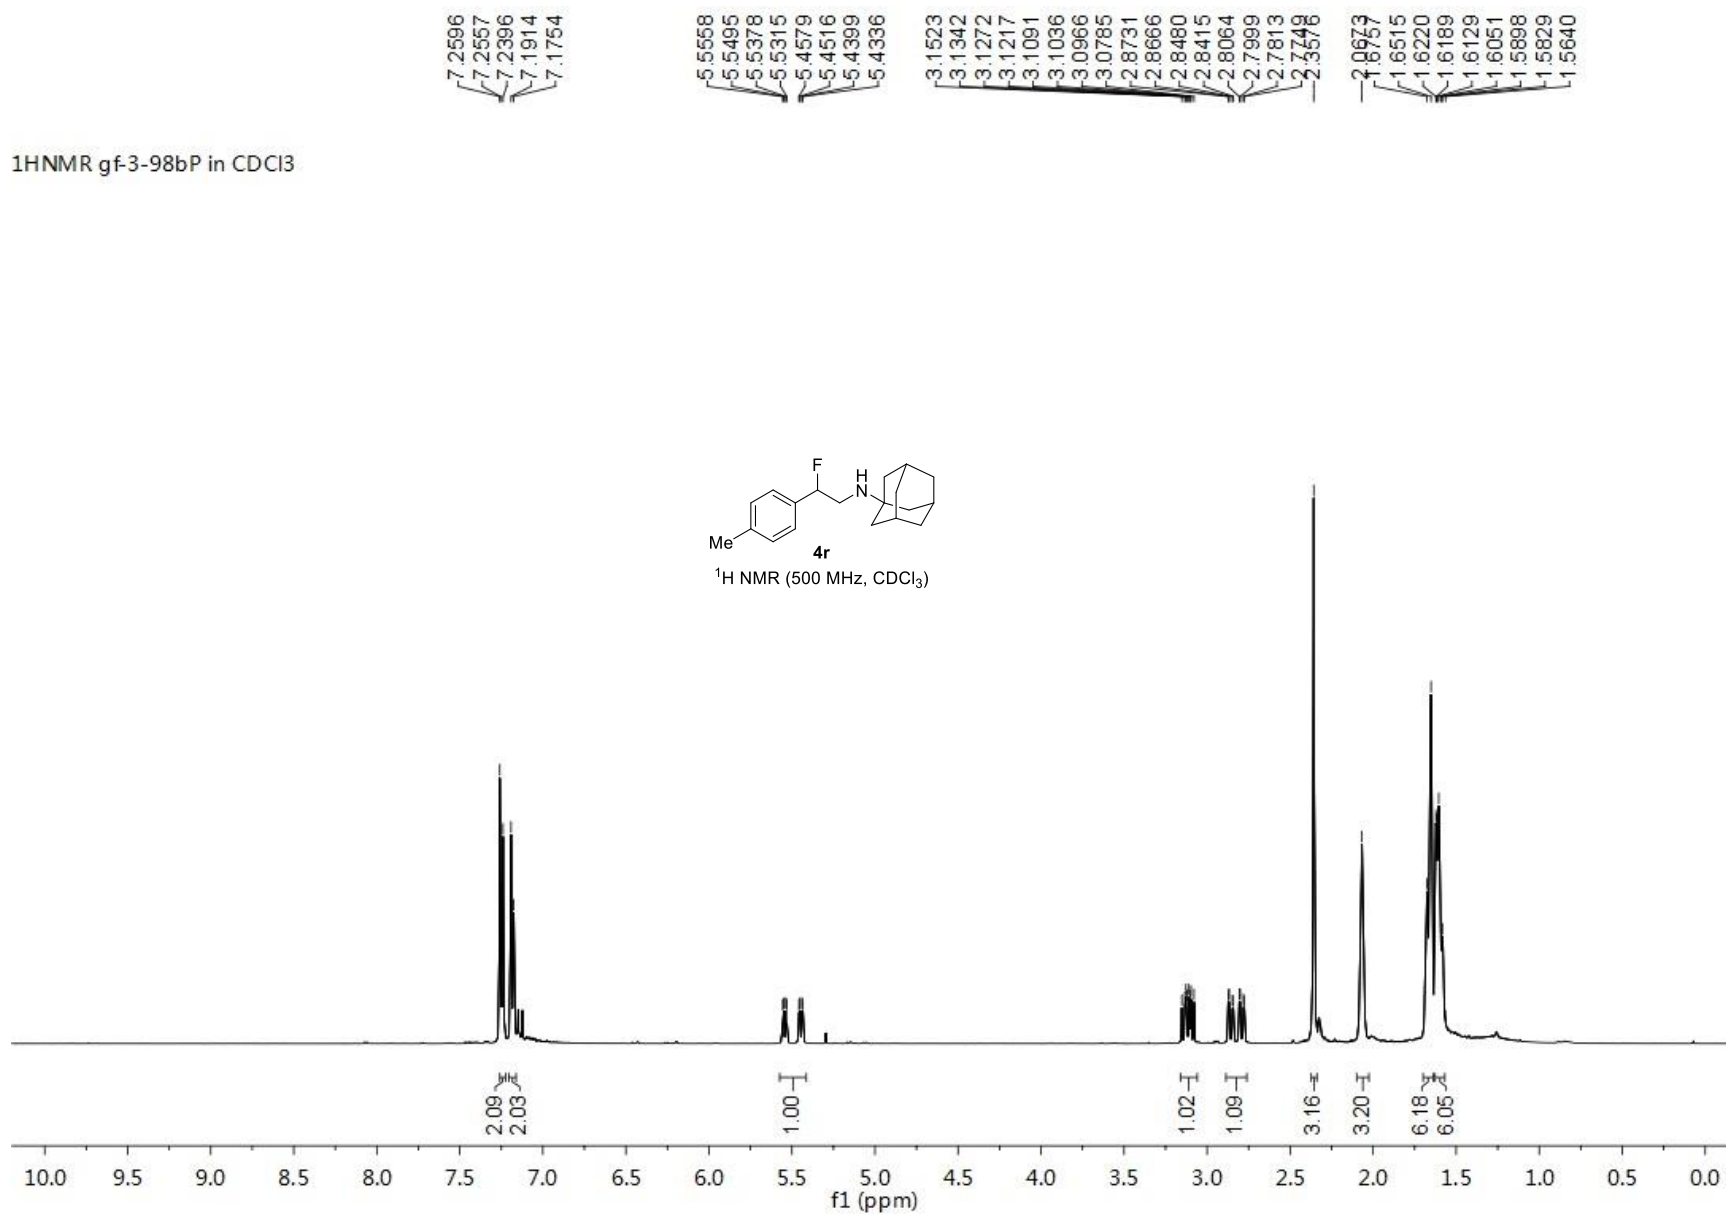

<sup>13</sup>C NMR gf-3-98bP in CDCl<sub>3</sub>

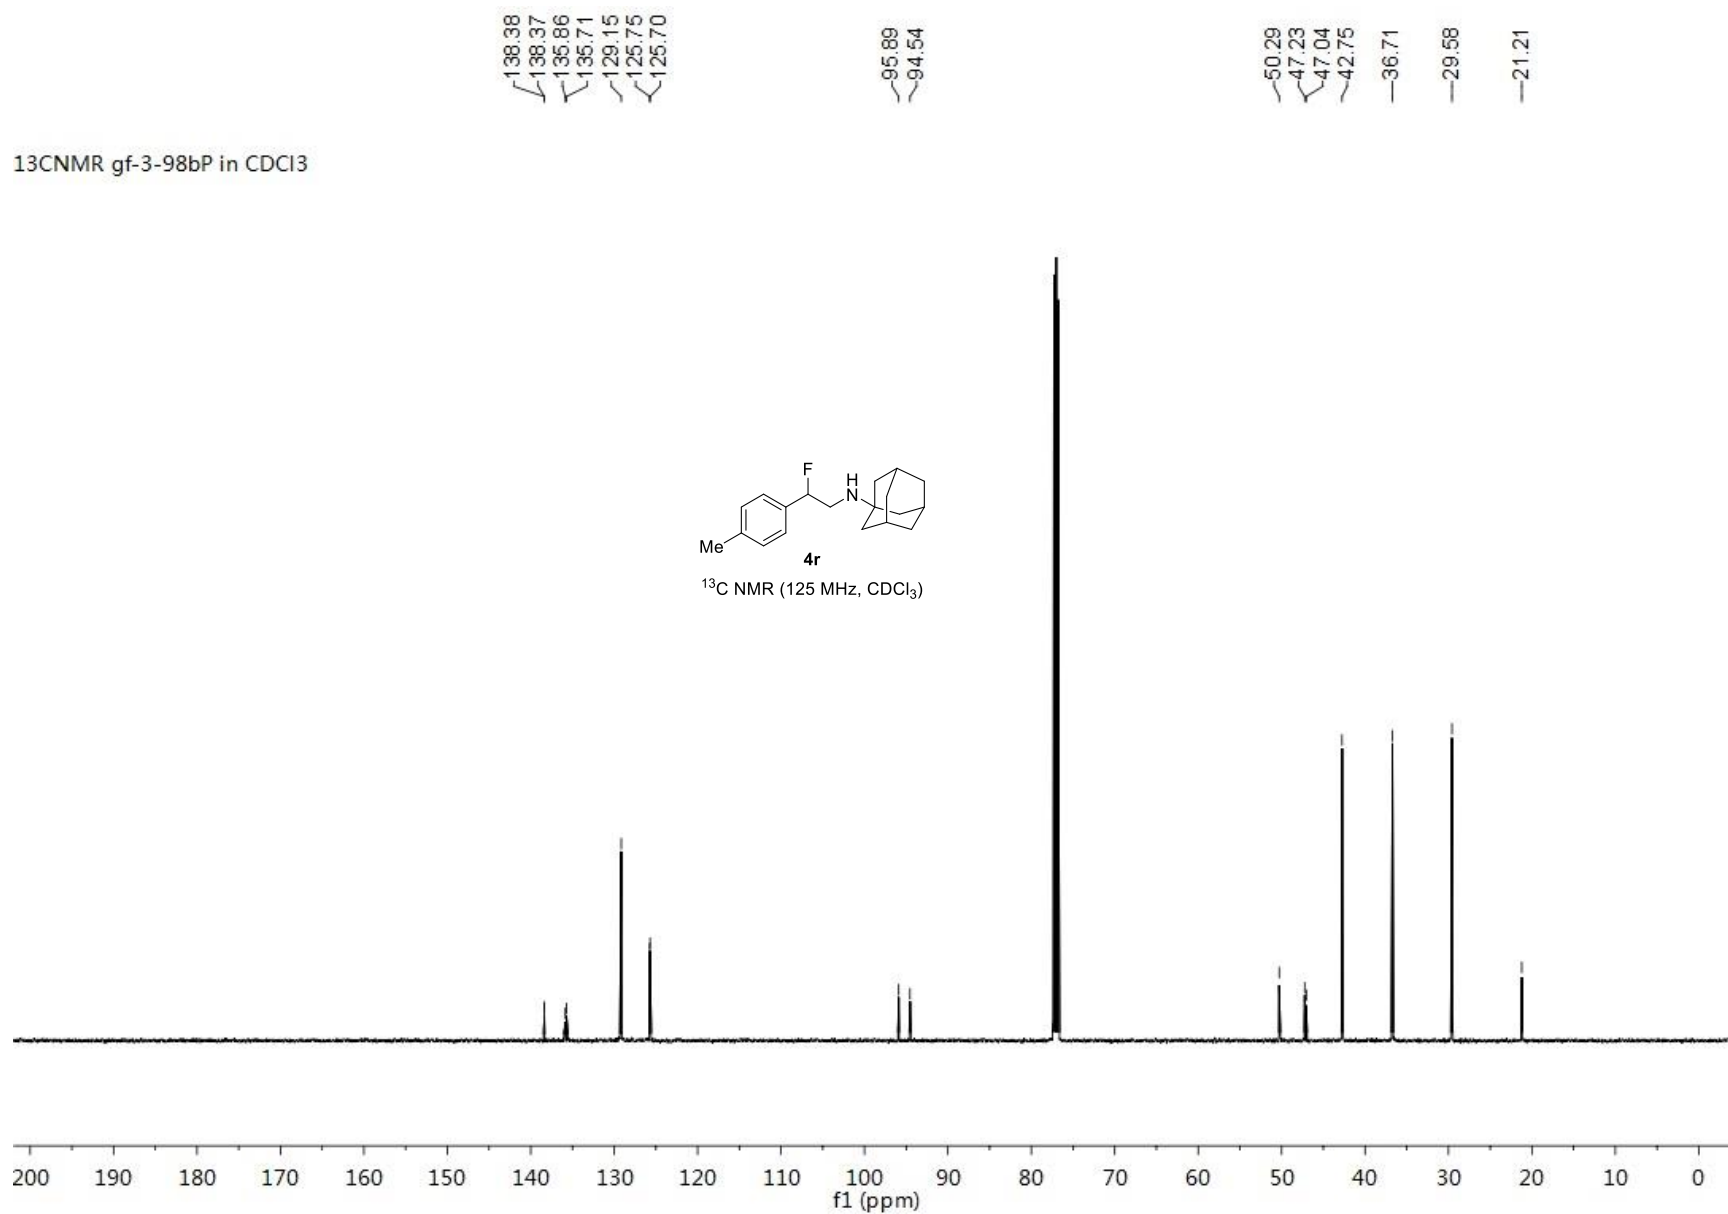

<sup>19</sup>F NMR gf-3-98bP in CDCl<sub>3</sub>

---180.0226

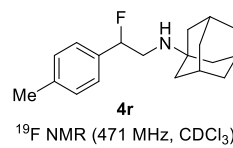

7.4048  
7.3901  
7.3511  
7.3367  
7.3213  
7.2904  
7.2760  
7.2599  
6.7142  
6.6888  
6.6821  
6.2673  
6.2537  
6.2483  
6.2407  
5.3403  
5.3381  
5.3306  
5.3277  
5.3249  
5.3174  
5.2412  
5.2392  
5.2315  
5.2287  
5.2259  
3.7388  
3.7380  
3.7488  
3.7394  
2.8351  
2.8192  
2.8071  
2.7985  
2.7912  
2.7826  
2.7705  
2.7546  
2.6817  
2.6758  
2.6537  
2.6478  
2.6142  
2.6050  
2.5961  
2.5867

<sup>1</sup>H NMR gf-3-135aP in CDCl<sub>3</sub>

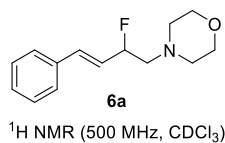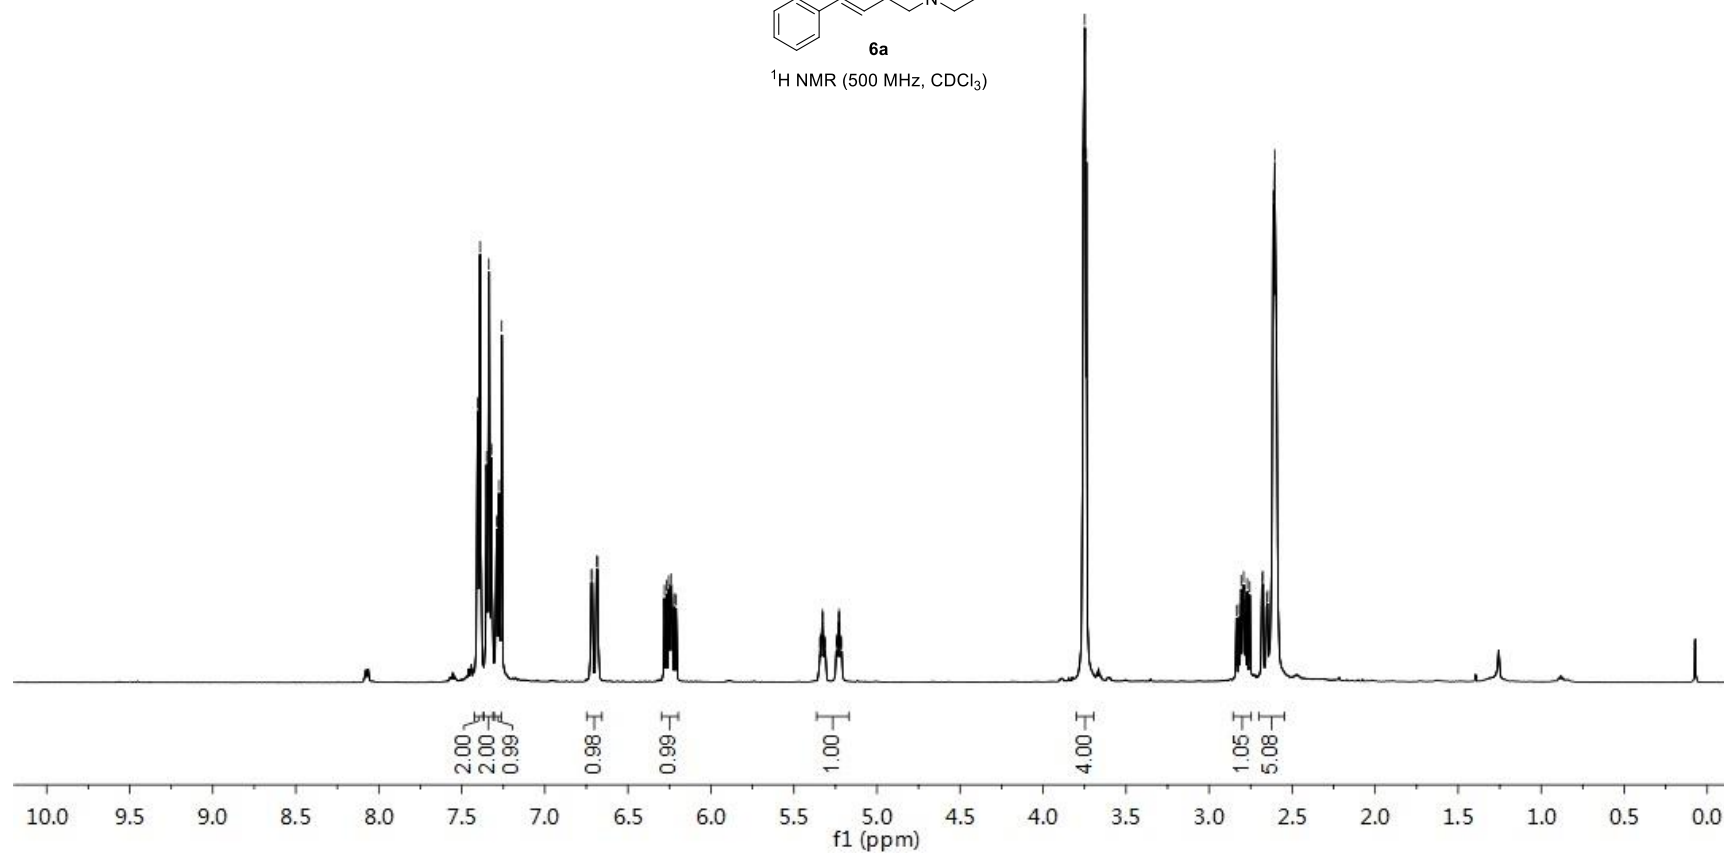

135.96  
135.95  
133.19  
133.10  
128.68  
128.29  
126.72  
125.59  
125.44

92.41  
91.05

66.93  
63.20  
63.02

54.16

<sup>13</sup>CNMR gf-3-135aP in CDCl<sub>3</sub>

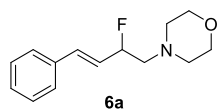

<sup>13</sup>C NMR (125 MHz, CDCl<sub>3</sub>)

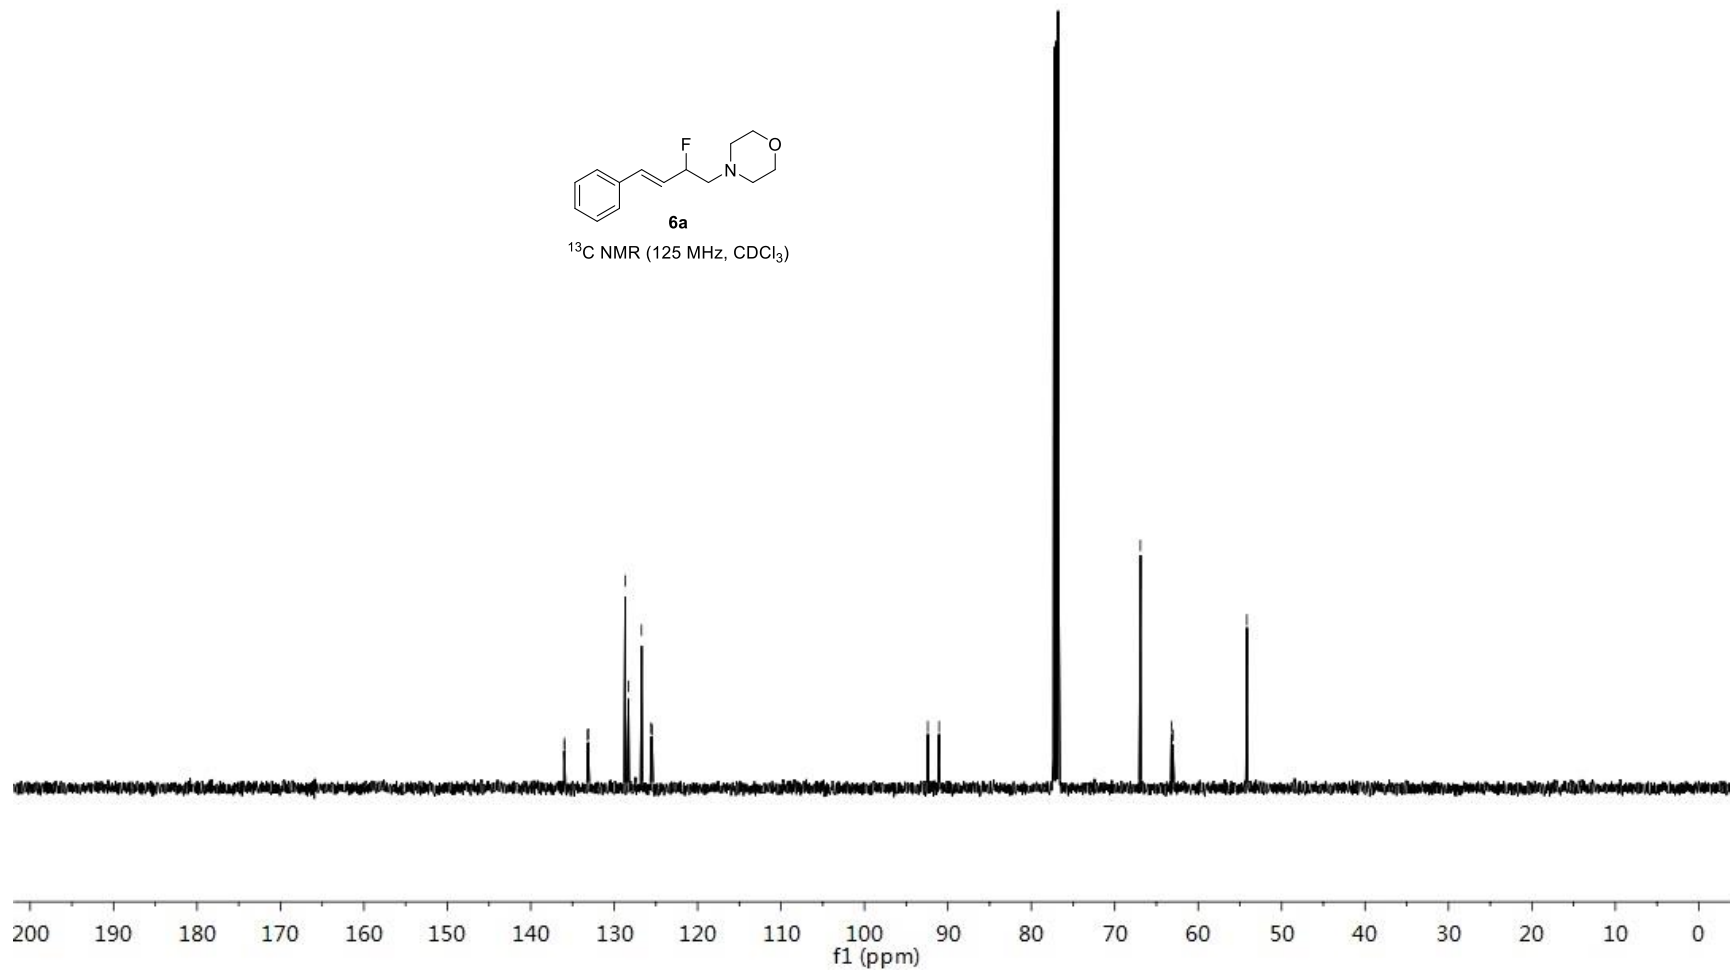



<sup>19</sup>F NMR gf-3-135aP in CDCl<sub>3</sub>

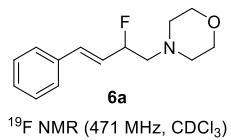

—174.3751

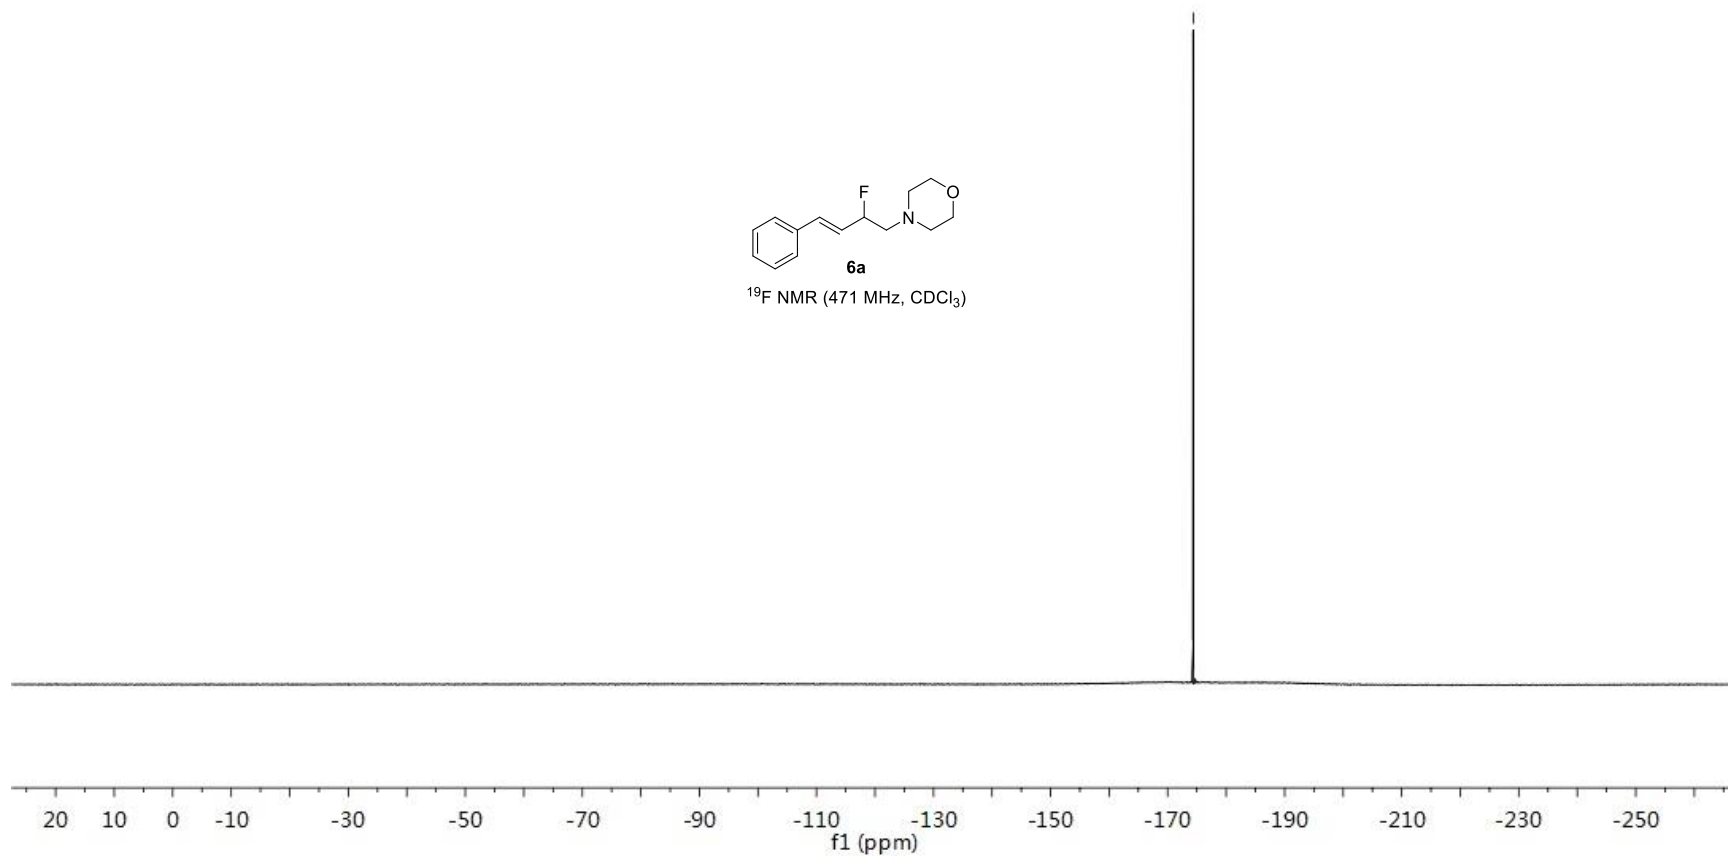

S200

8.0121  
7.9959  
7.4499  
7.4338  
7.2602  
6.7496  
6.7176  
6.3836  
6.3717  
6.3540  
6.3421  
6.3227  
6.3108  
5.3809  
5.3457  
5.2926  
5.2473  
5.2115  
4.3932  
4.3791  
4.3649  
4.3508  
3.7507  
3.7422  
3.7336  
2.8118  
2.7994  
2.7901  
2.7841  
2.7749  
2.7625  
2.7467  
2.6907  
2.6857  
2.6626  
2.6576  
2.6242  
2.5991  
2.4069  
1.3917  
1.3776

<sup>1</sup>H NMR of 6b in CDCl<sub>3</sub>

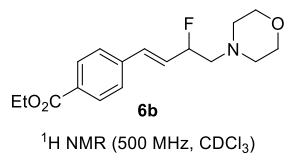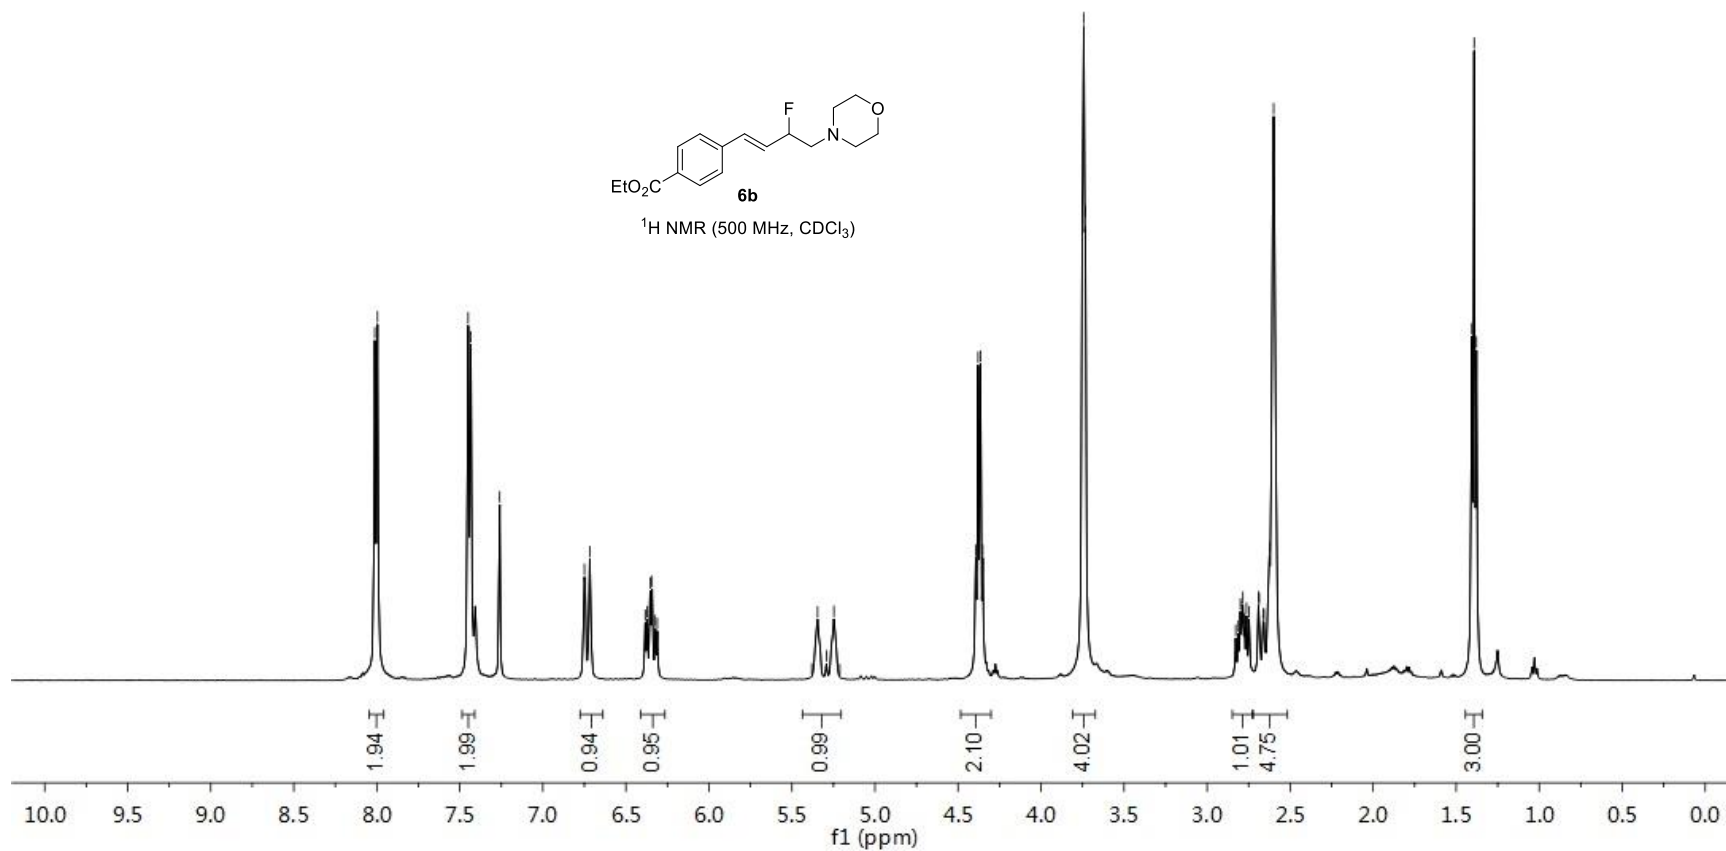

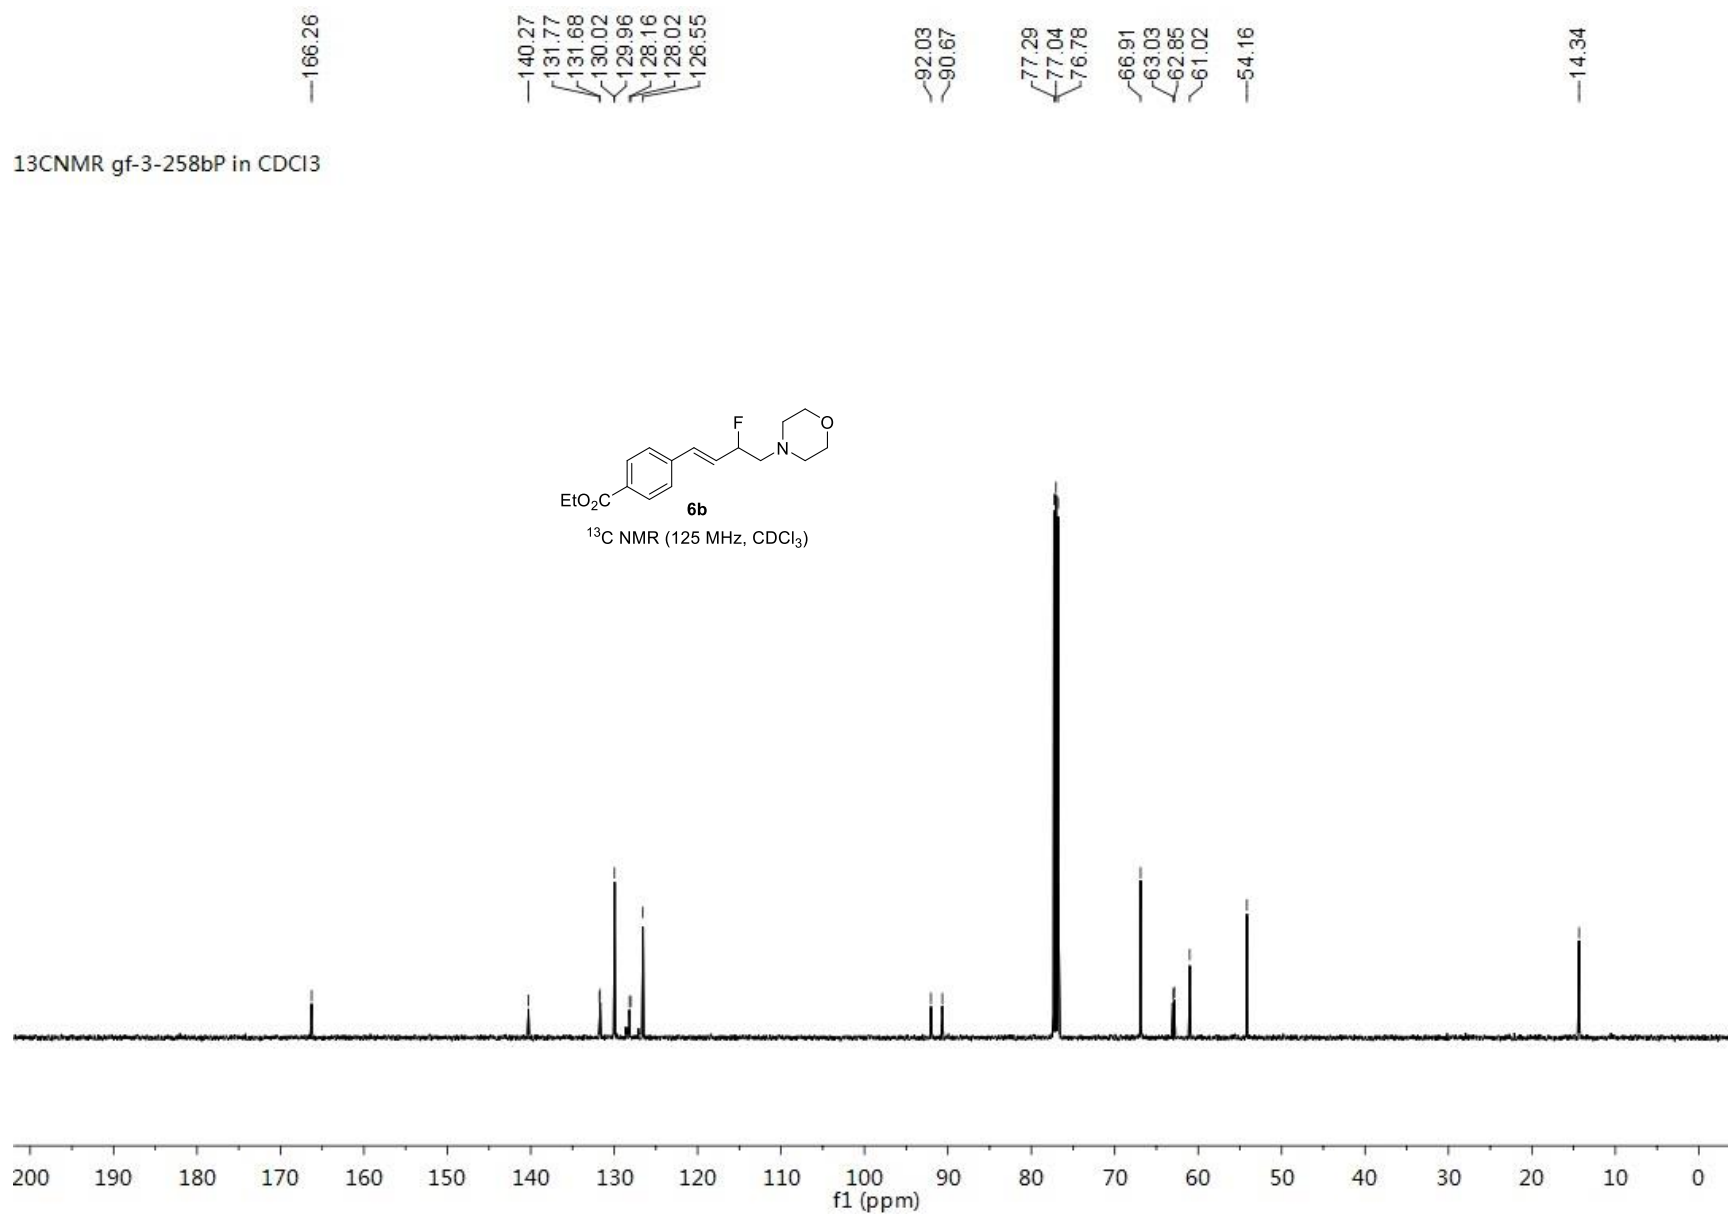

<sup>19</sup>F NMR gf-3-258bP in CDCl<sub>3</sub>

---176.5648

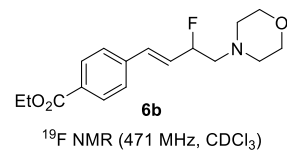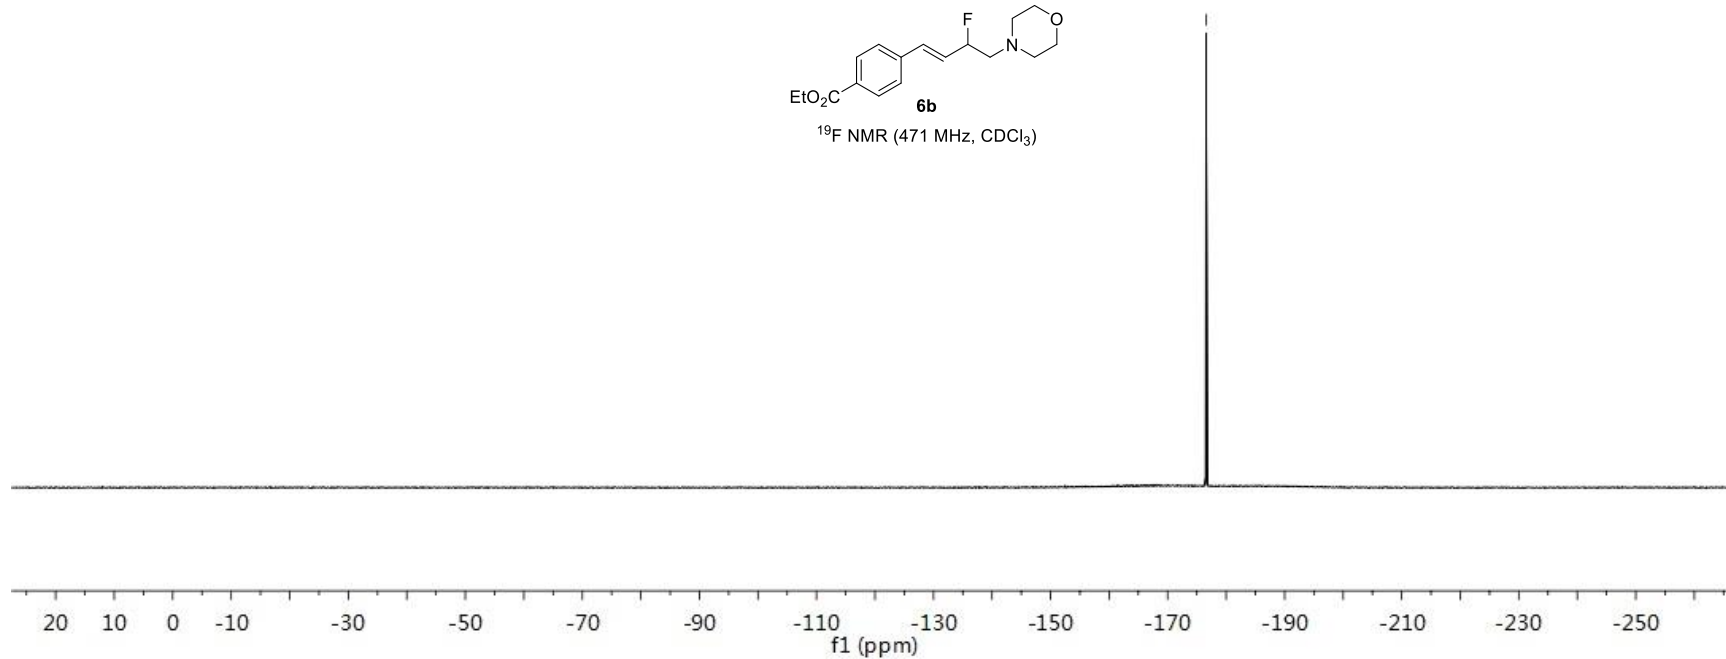

7.5930  
7.5767  
7.4930  
7.4768  
7.2602  
6.7498  
6.7177  
6.7139  
6.3733  
6.3615  
6.3434  
6.3316  
5.3600  
5.3527  
5.2935  
5.2543  
5.2132  
3.7544  
3.7453  
3.7360  
2.8287  
2.8131  
2.8007  
2.7912  
2.7852  
2.7757  
2.7633  
2.7477  
2.6980  
2.6920  
2.6699  
2.6639  
2.6377  
2.6316  
2.6039

<sup>1</sup>H NMR of **6c** in CDCl<sub>3</sub>

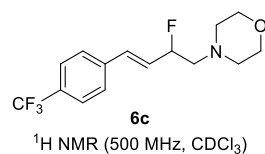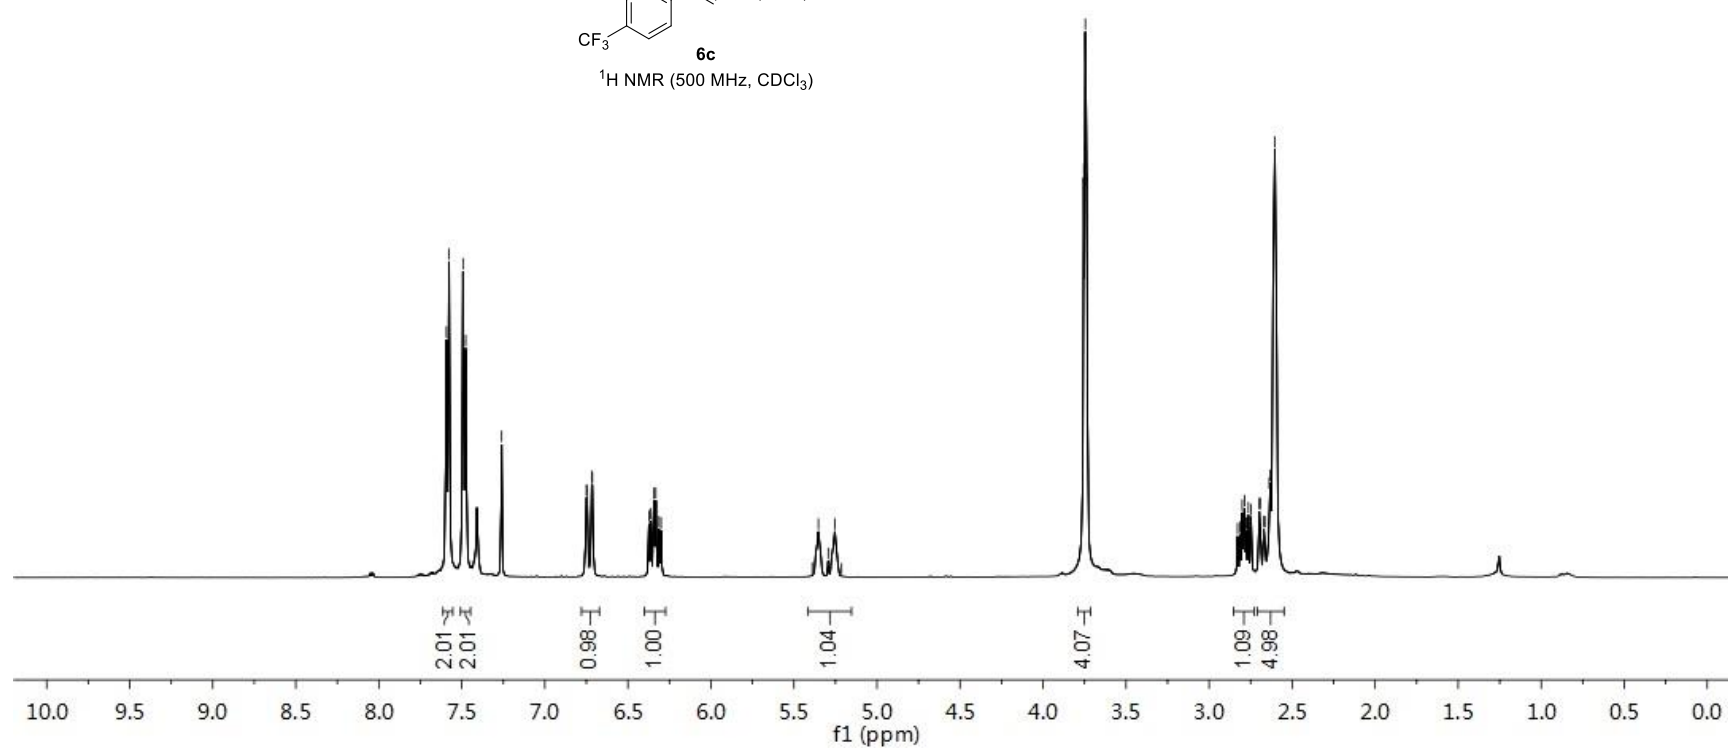

<sup>13</sup>CNMR gf-3-251bP in CDCl<sub>3</sub>

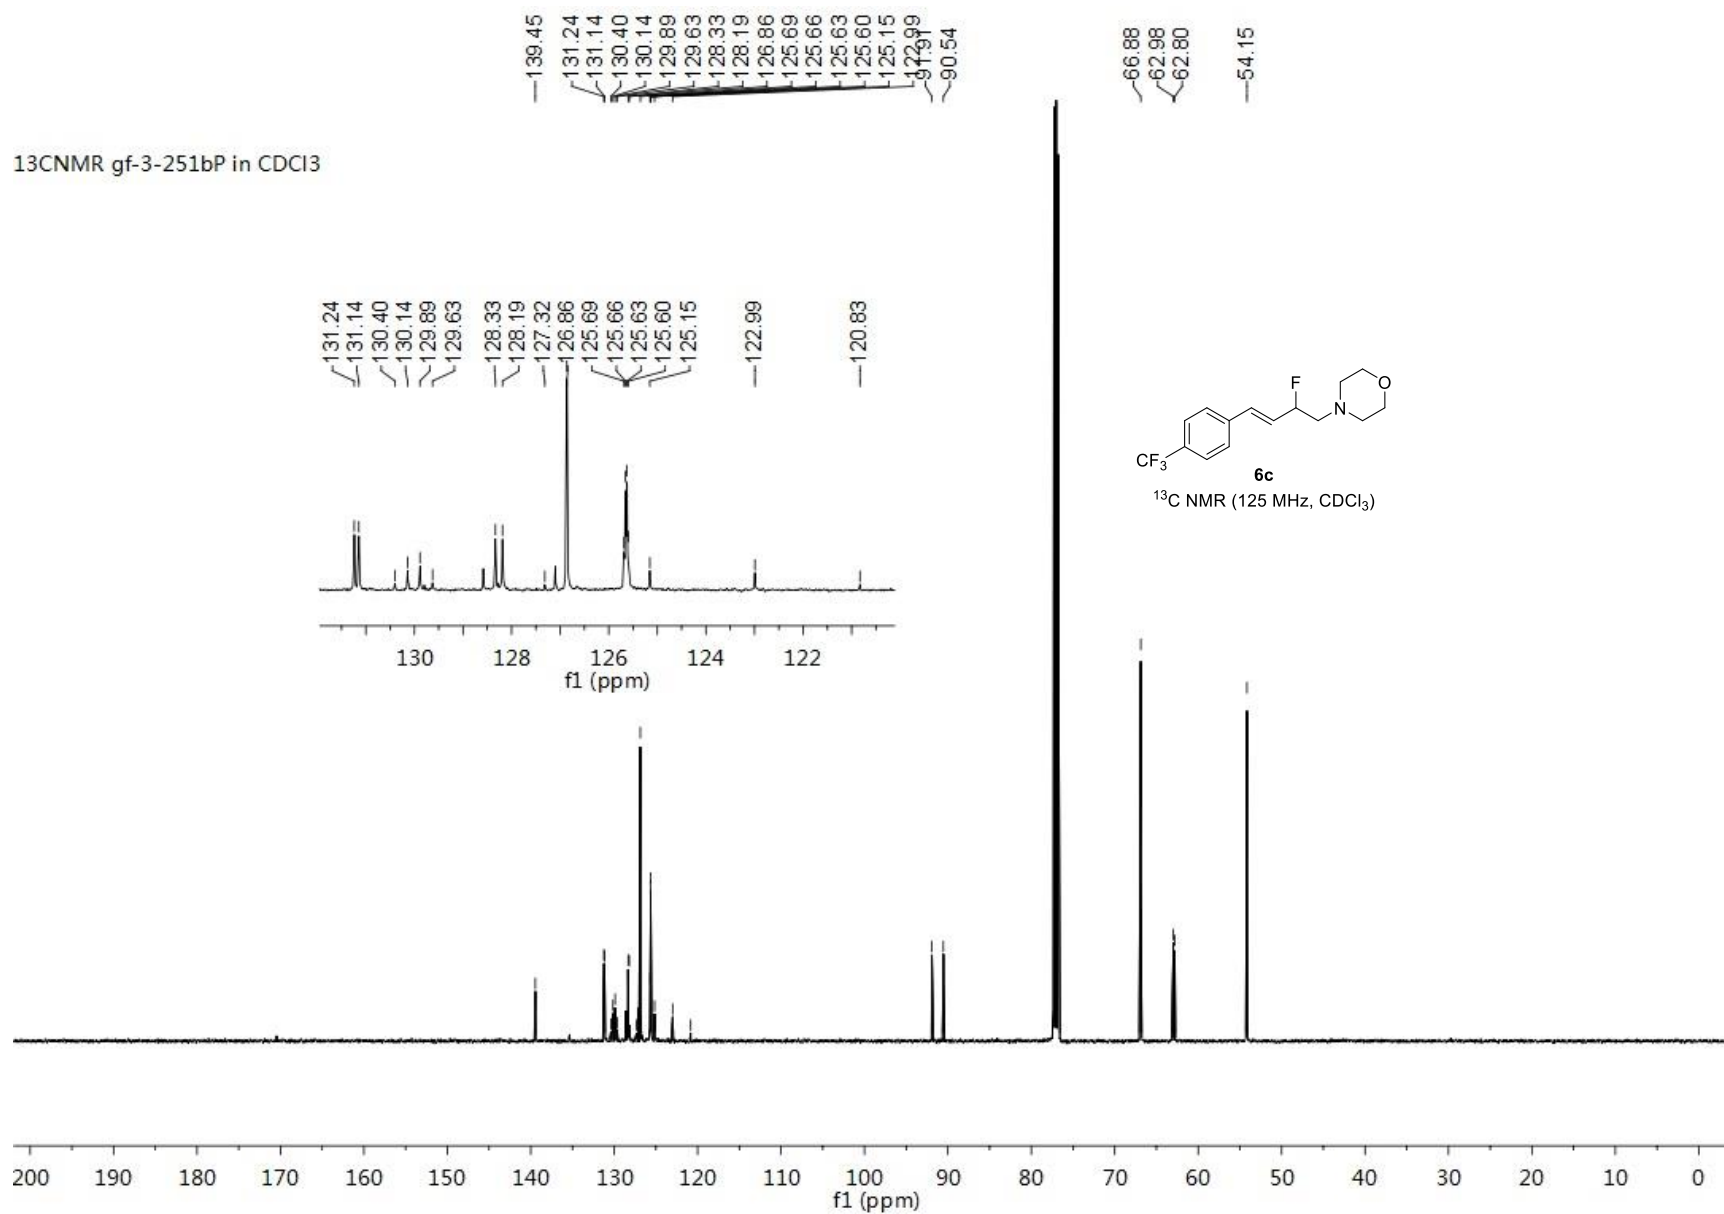

<sup>19</sup>F NMR gf-3-251bP in CDCl<sub>3</sub>

62.6069

176.9829

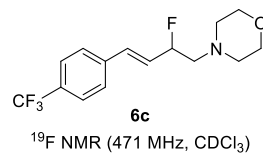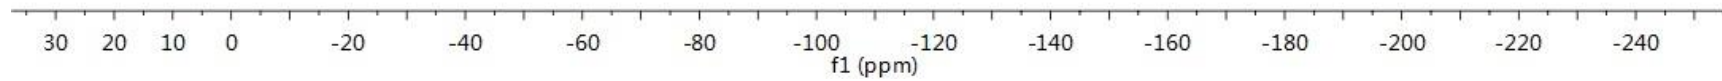

7.3296  
7.3246  
7.3119  
7.3059  
7.2933  
7.2882  
7.2598  
6.6688  
6.6368  
6.6315  
6.2401  
6.2252  
6.2126  
6.2082  
5.3233  
5.3210  
5.3139  
5.3111  
5.3084  
5.3012  
5.2246  
5.2223  
5.2150  
5.2123  
5.2095  
3.7468  
3.7407  
3.7313  
2.8166  
2.8009  
2.7886  
2.7797  
2.7729  
2.7640  
2.7517  
2.7359  
2.6704  
2.6644  
2.6424  
2.6364  
2.6090  
2.6024  
2.5928  
2.5837

<sup>1</sup>H NMR of gf-3-147aP in CDCl<sub>3</sub>

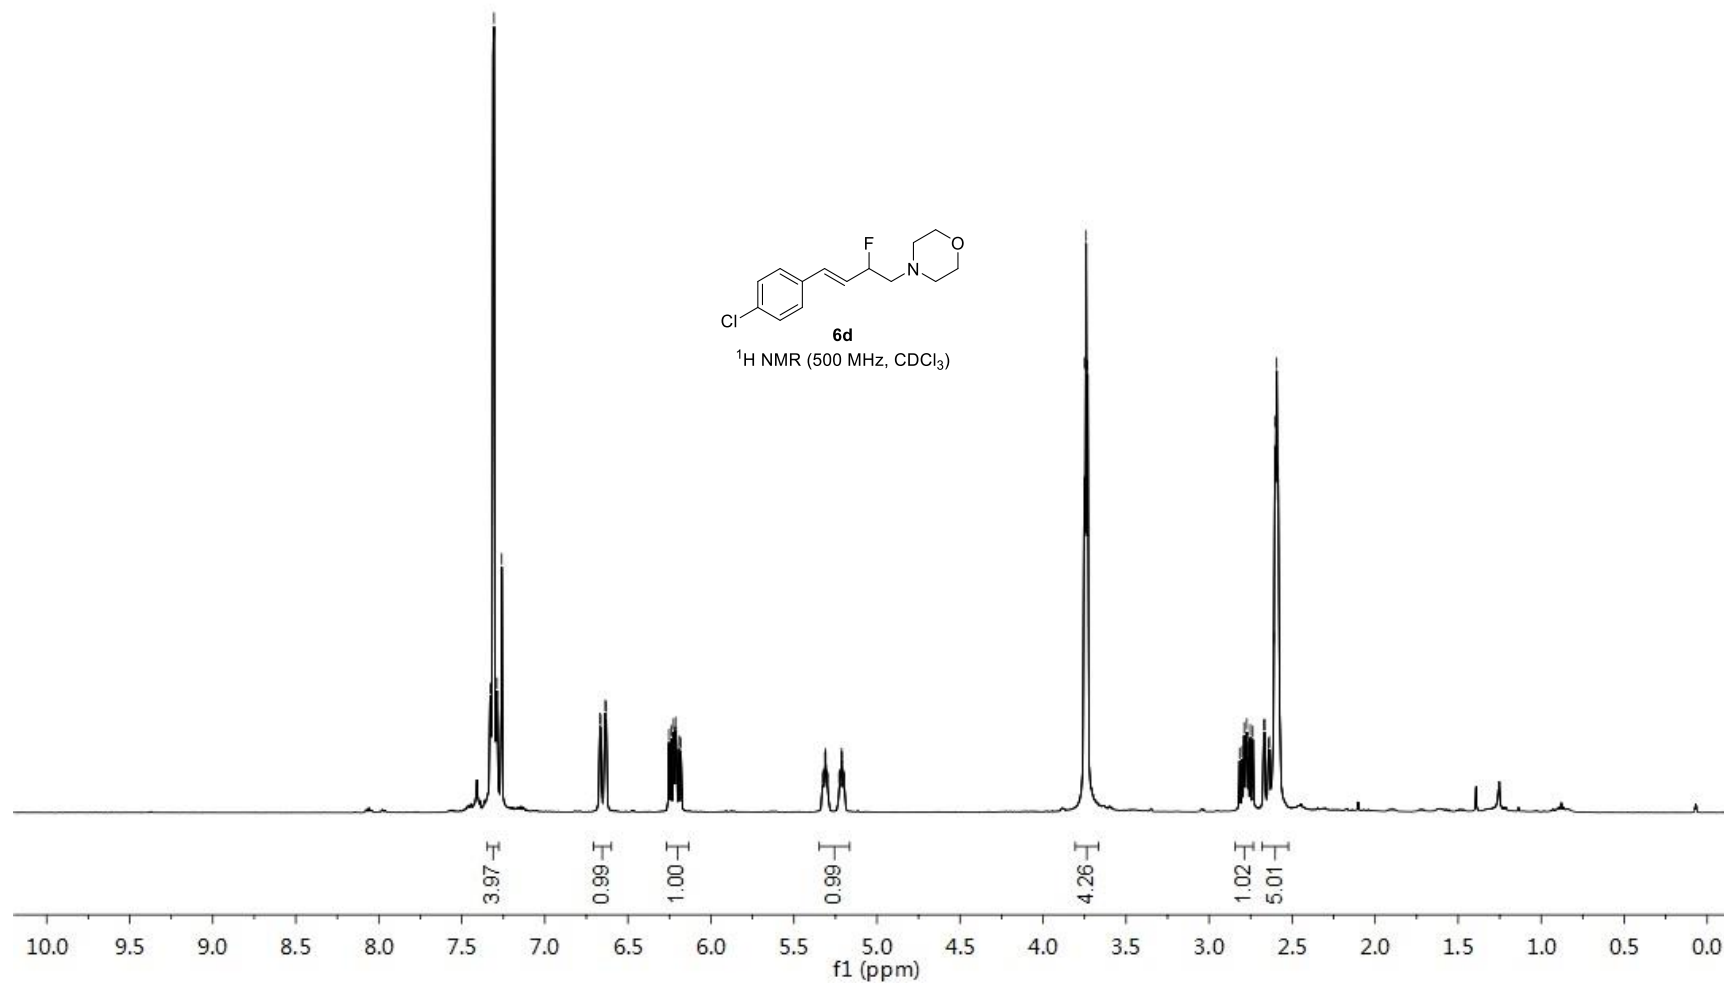



134.47  
133.97  
131.77  
131.68  
128.86  
127.91  
126.27  
126.13

92.19  
90.83

66.92  
63.10  
62.92

54.17

<sup>13</sup>CNMR gf-3-147aP in CDCl<sub>3</sub>

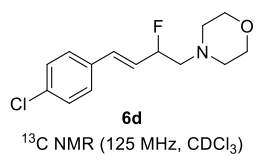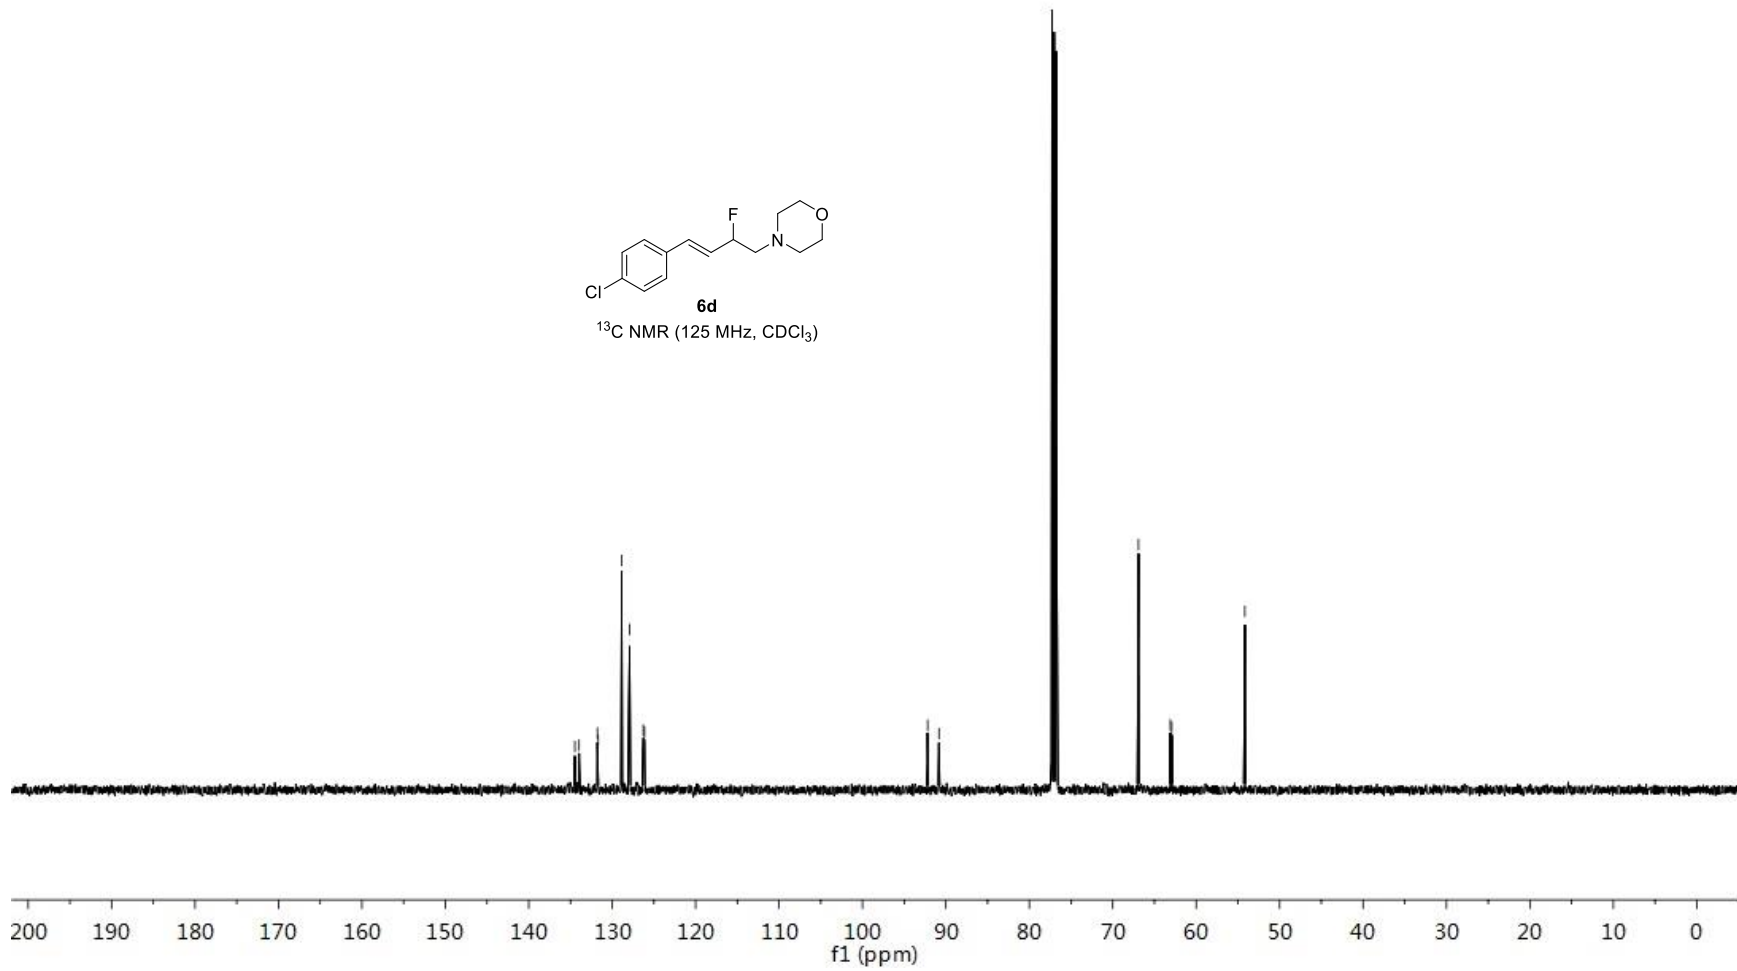

<sup>19</sup>F NMR gf-3-147aP in CDCl<sub>3</sub>

—175.2228

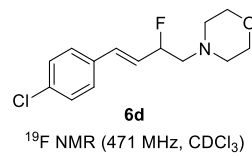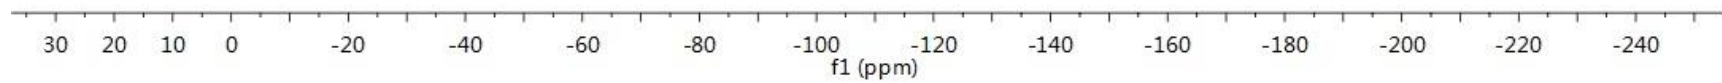

7.4617  
7.4449  
7.2600  
7.2438  
6.6516  
6.6458  
6.6196  
6.6139  
6.2539  
6.2387  
6.2345  
6.2262  
5.3203  
5.3144  
5.3072  
5.3045  
5.3018  
5.2945  
5.2179  
5.2156  
5.2084  
5.2057  
5.2030  
5.1971  
3.7380  
3.7286  
2.8127  
2.7969  
2.7847  
2.7757  
2.7689  
2.7600  
2.7477  
2.7319  
2.6674  
2.6614  
2.6394  
2.6334  
2.6061  
2.5995  
2.5899  
2.5807  
2.5286

<sup>1</sup>H NMR of 6e in CDCl<sub>3</sub>

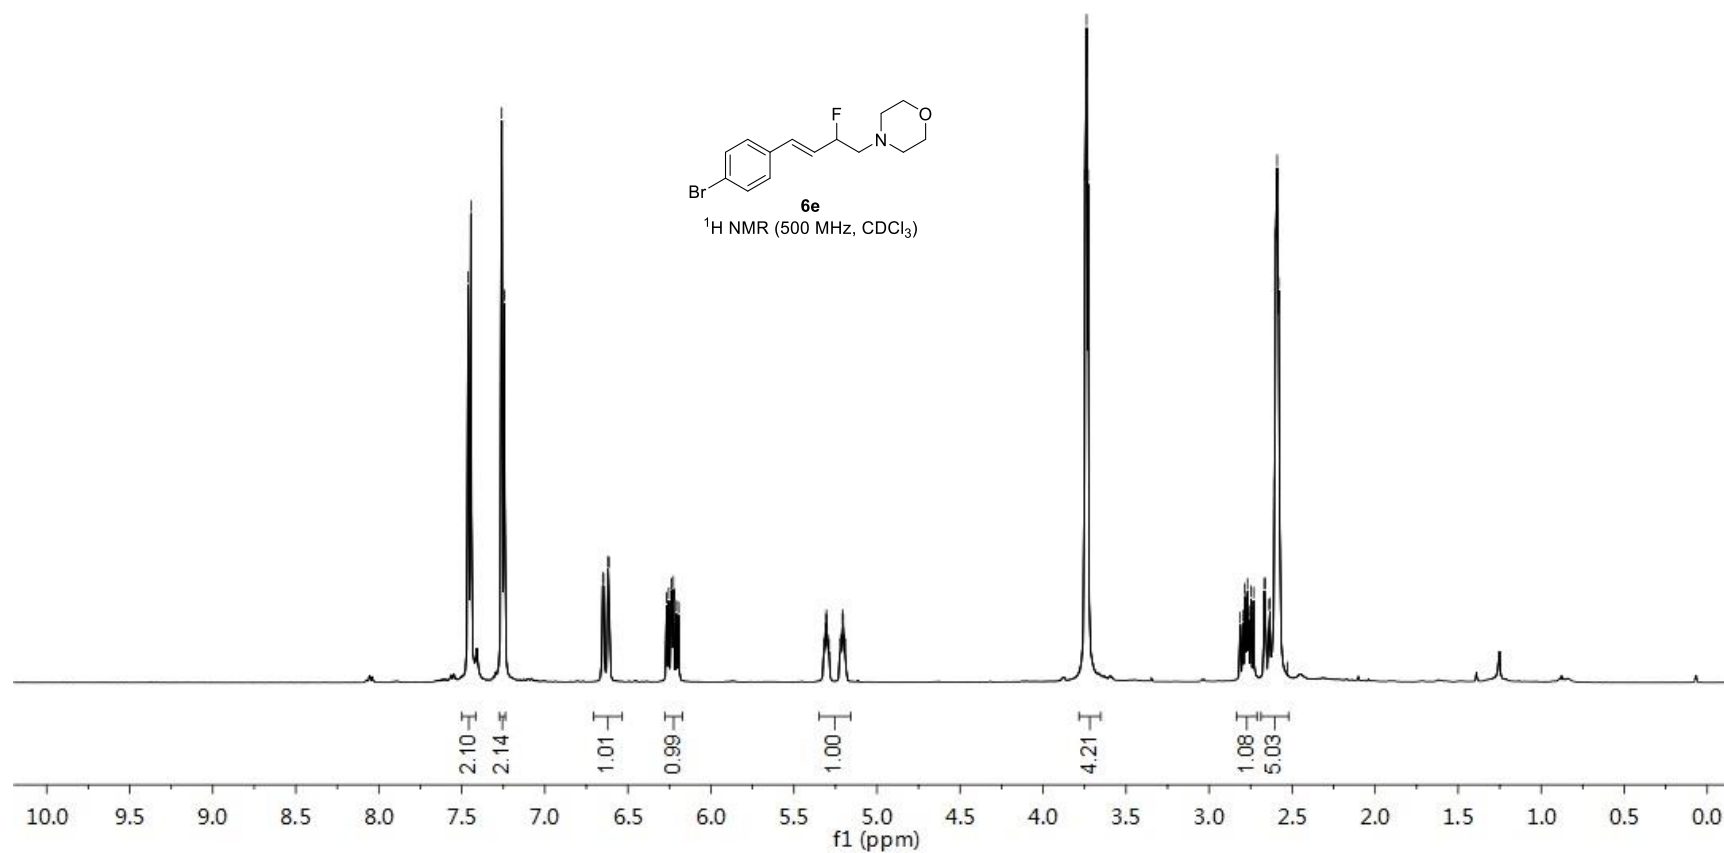

134.92  
131.81  
131.79  
131.69  
128.22  
126.41  
126.27  
122.13

92.17  
90.81

66.91  
63.07  
62.89

54.16

<sup>13</sup>CNMR gf-3-147bP in CDCl<sub>3</sub>

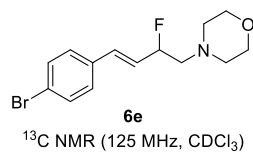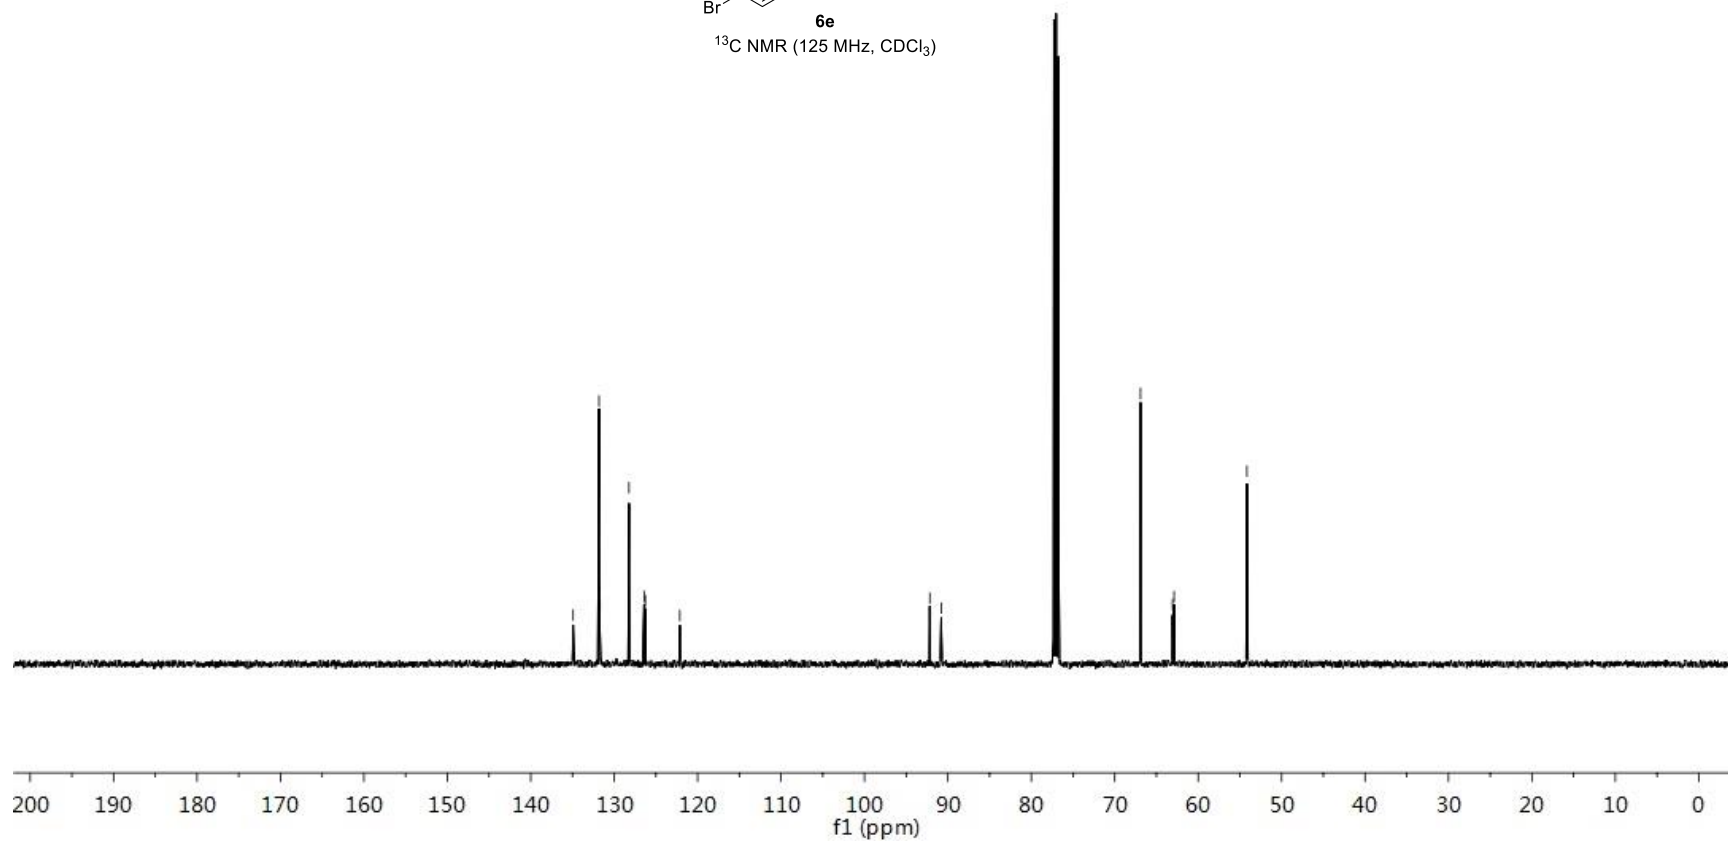

<sup>19</sup>F NMR gf-3-147bP in CDCl<sub>3</sub>

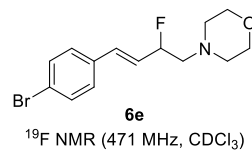

---175.4165



7.8168  
7.8106  
7.8035  
7.7942  
7.7627  
7.5992  
7.5969  
7.5820  
7.5799  
7.4932  
7.4825  
7.4775  
7.4705  
7.4632  
7.4586  
7.4479  
7.2599  
6.8925  
6.8667  
6.8606  
6.3795  
6.3653  
6.3606  
6.3525  
6.3478  
6.3408  
5.4685  
5.4231  
5.3699  
5.3253

3.8101  
3.8014  
3.7926  
2.9097  
2.8936  
2.8816  
2.8735  
2.8658  
2.8579  
2.8456  
2.8295  
2.7937  
2.7654  
2.7299  
2.6975  
2.6908  
2.6096

<sup>1</sup>H NMR of gf-3-248bP in CDCl<sub>3</sub>

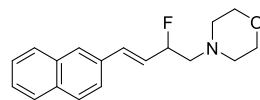

**6f**  
<sup>1</sup>H NMR (500 MHz, CDCl<sub>3</sub>)

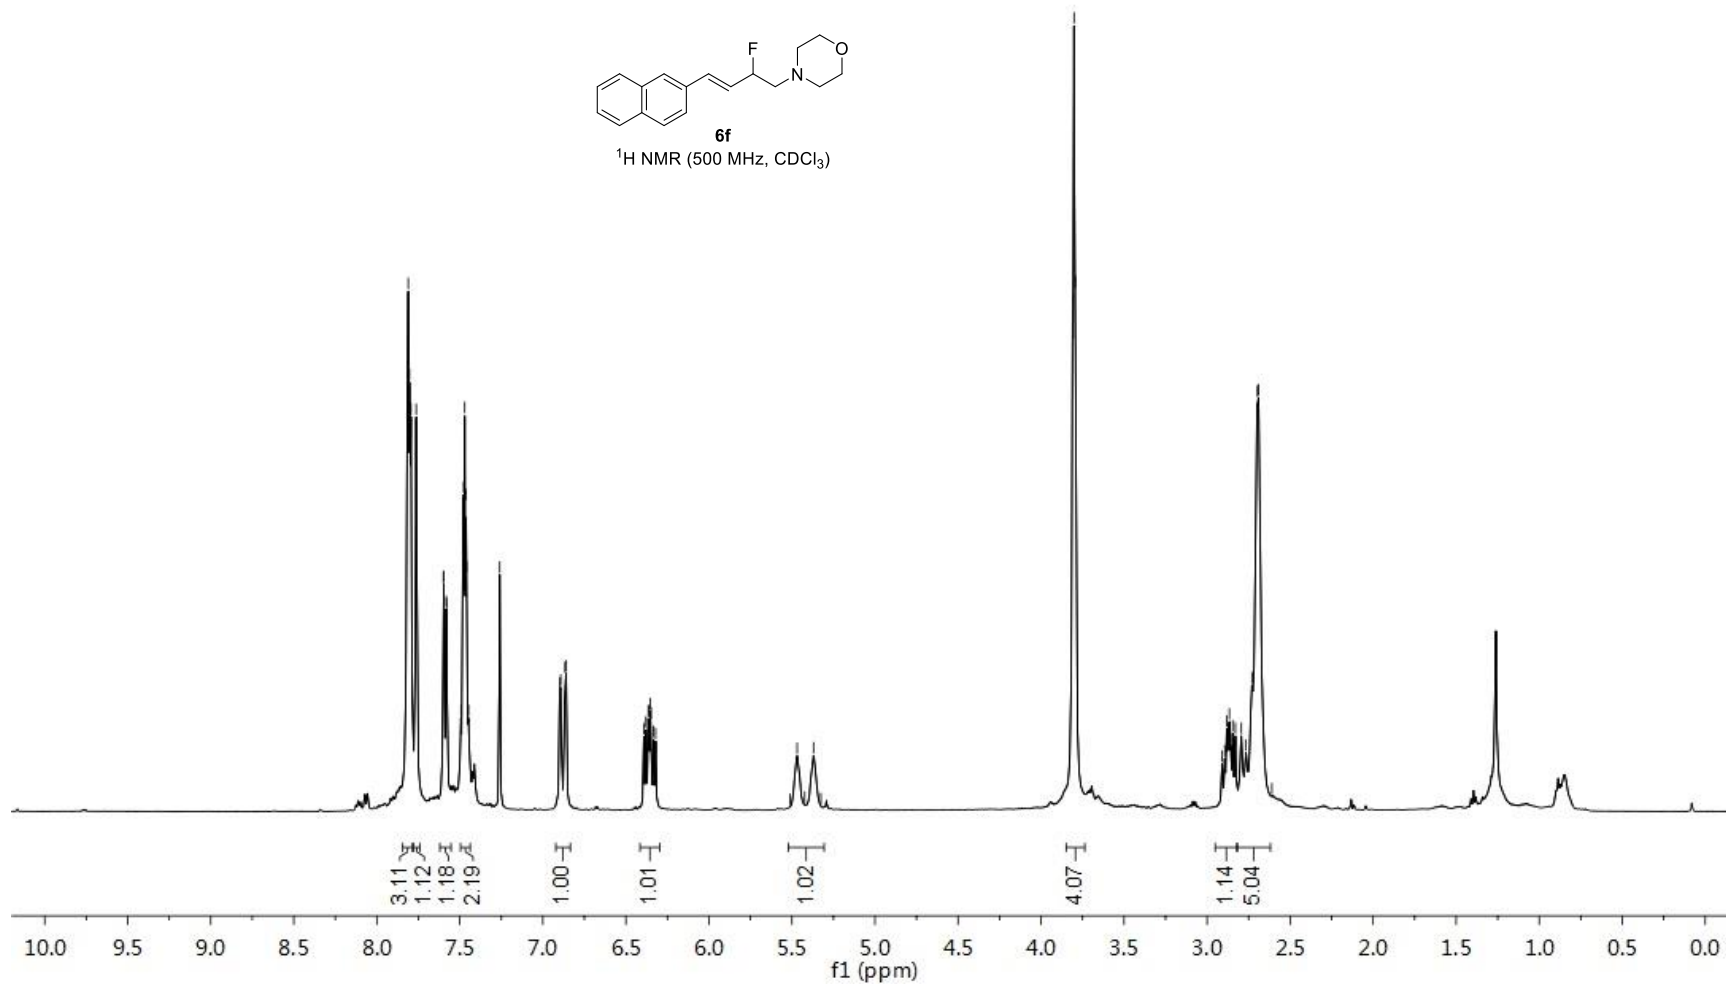

<sup>13</sup>CNMR gf-3-248bP in CDCl<sub>3</sub>

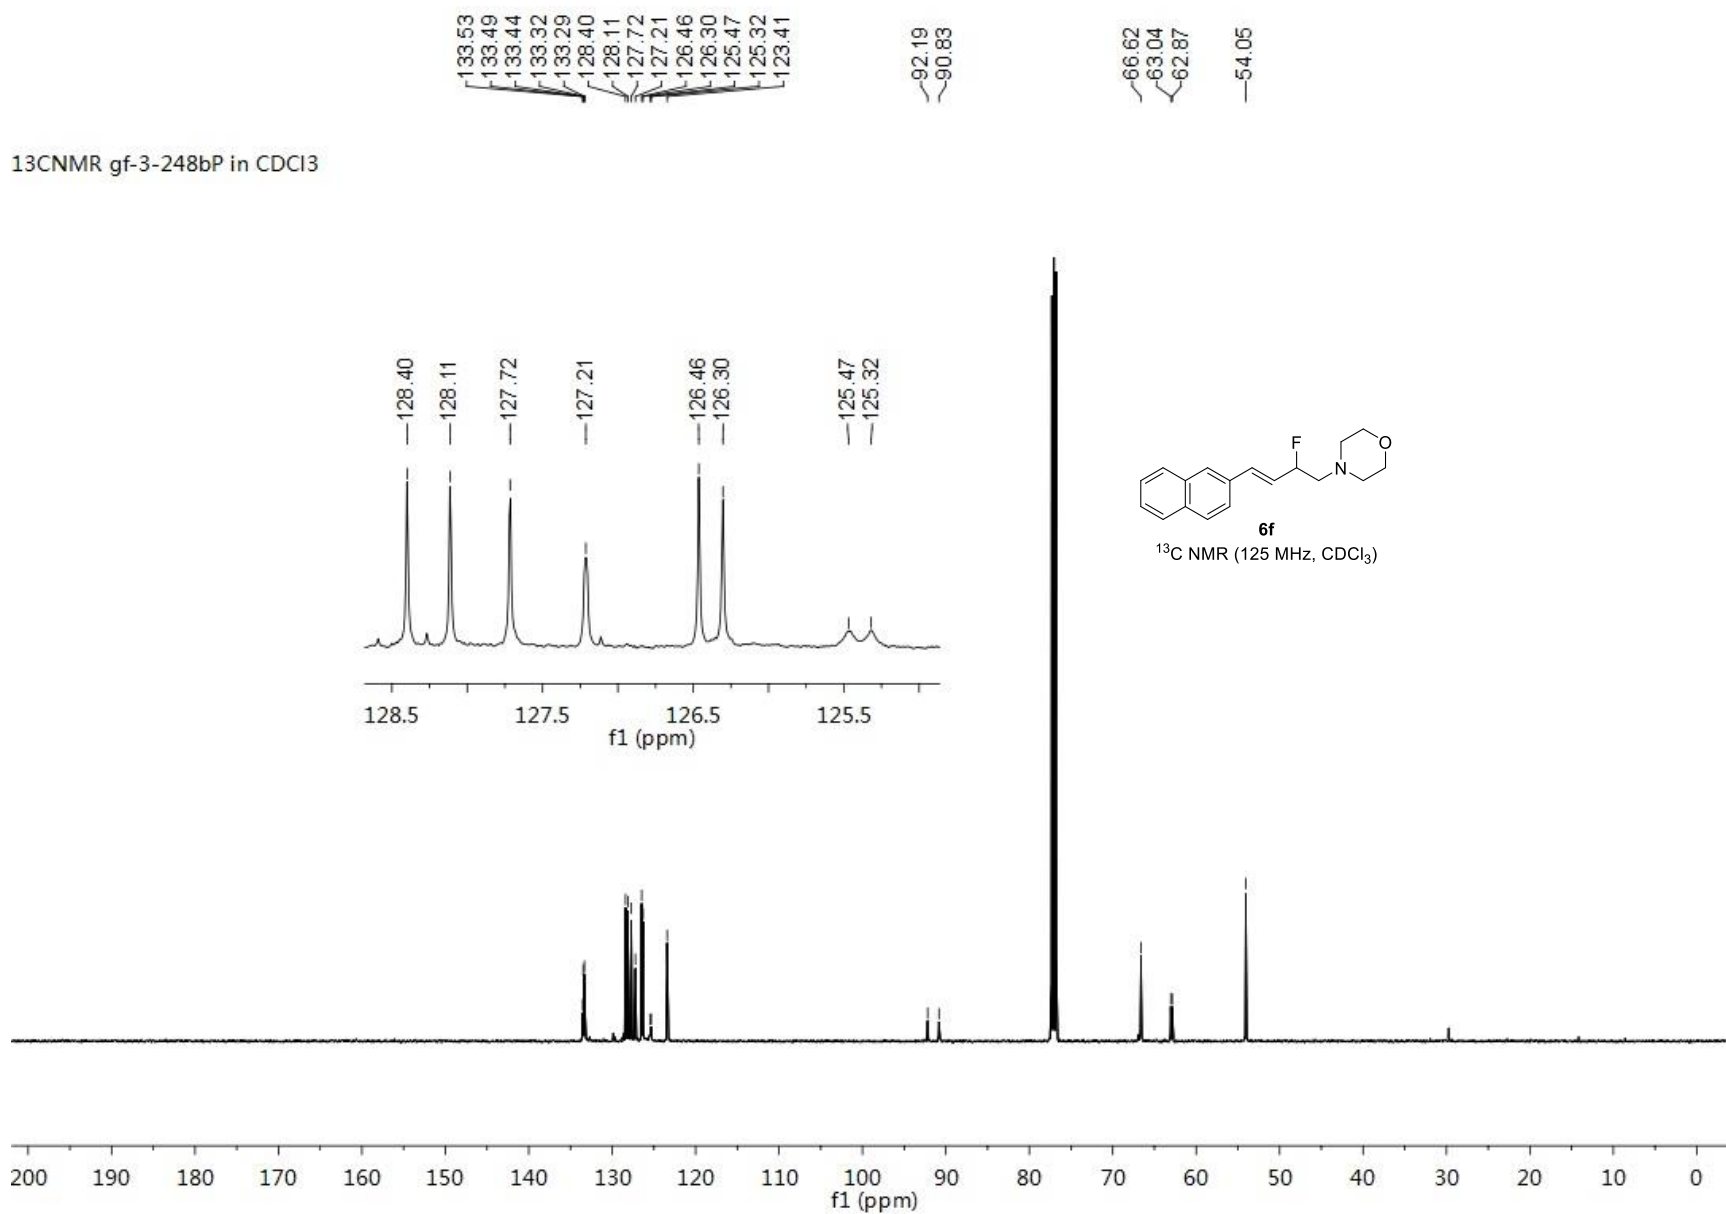

<sup>19</sup>F NMR gf-3-248bP in CDCl<sub>3</sub>

—174.0227

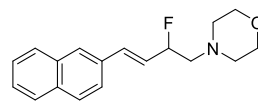

<sup>19</sup>F NMR (471 MHz, CDCl<sub>3</sub>)

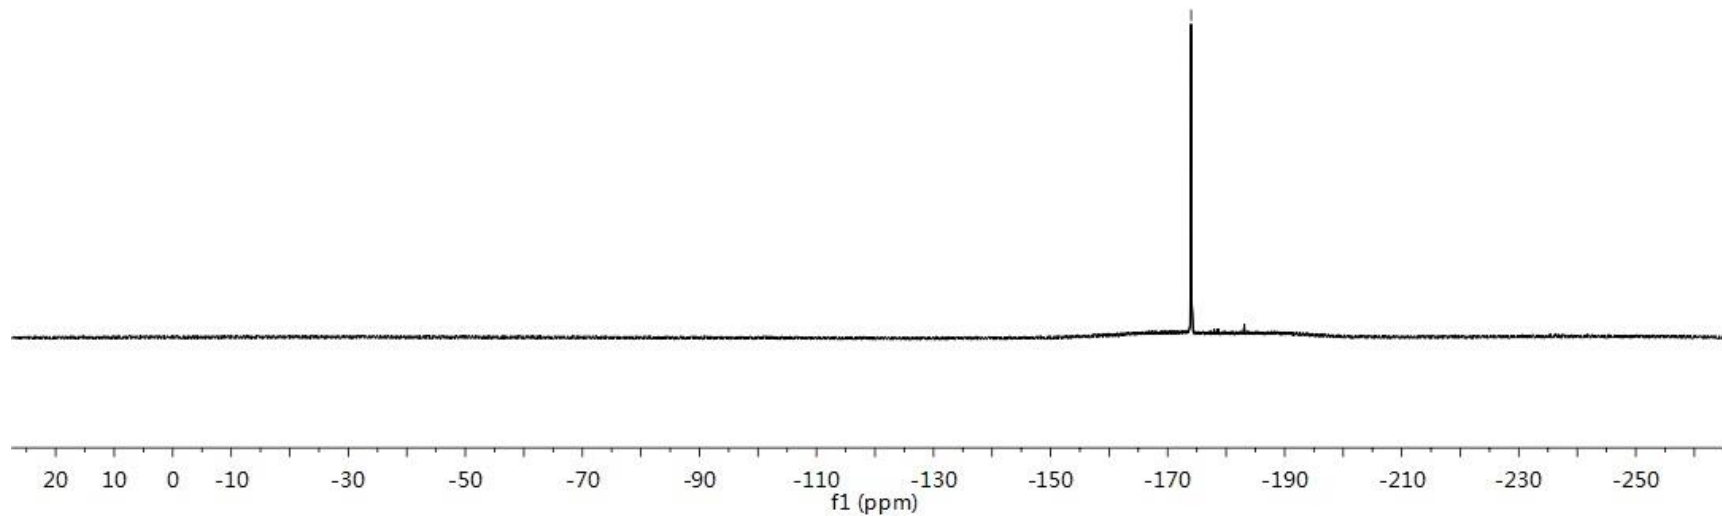

S215



<sup>1</sup>H NMR of 6g in CDCl<sub>3</sub>

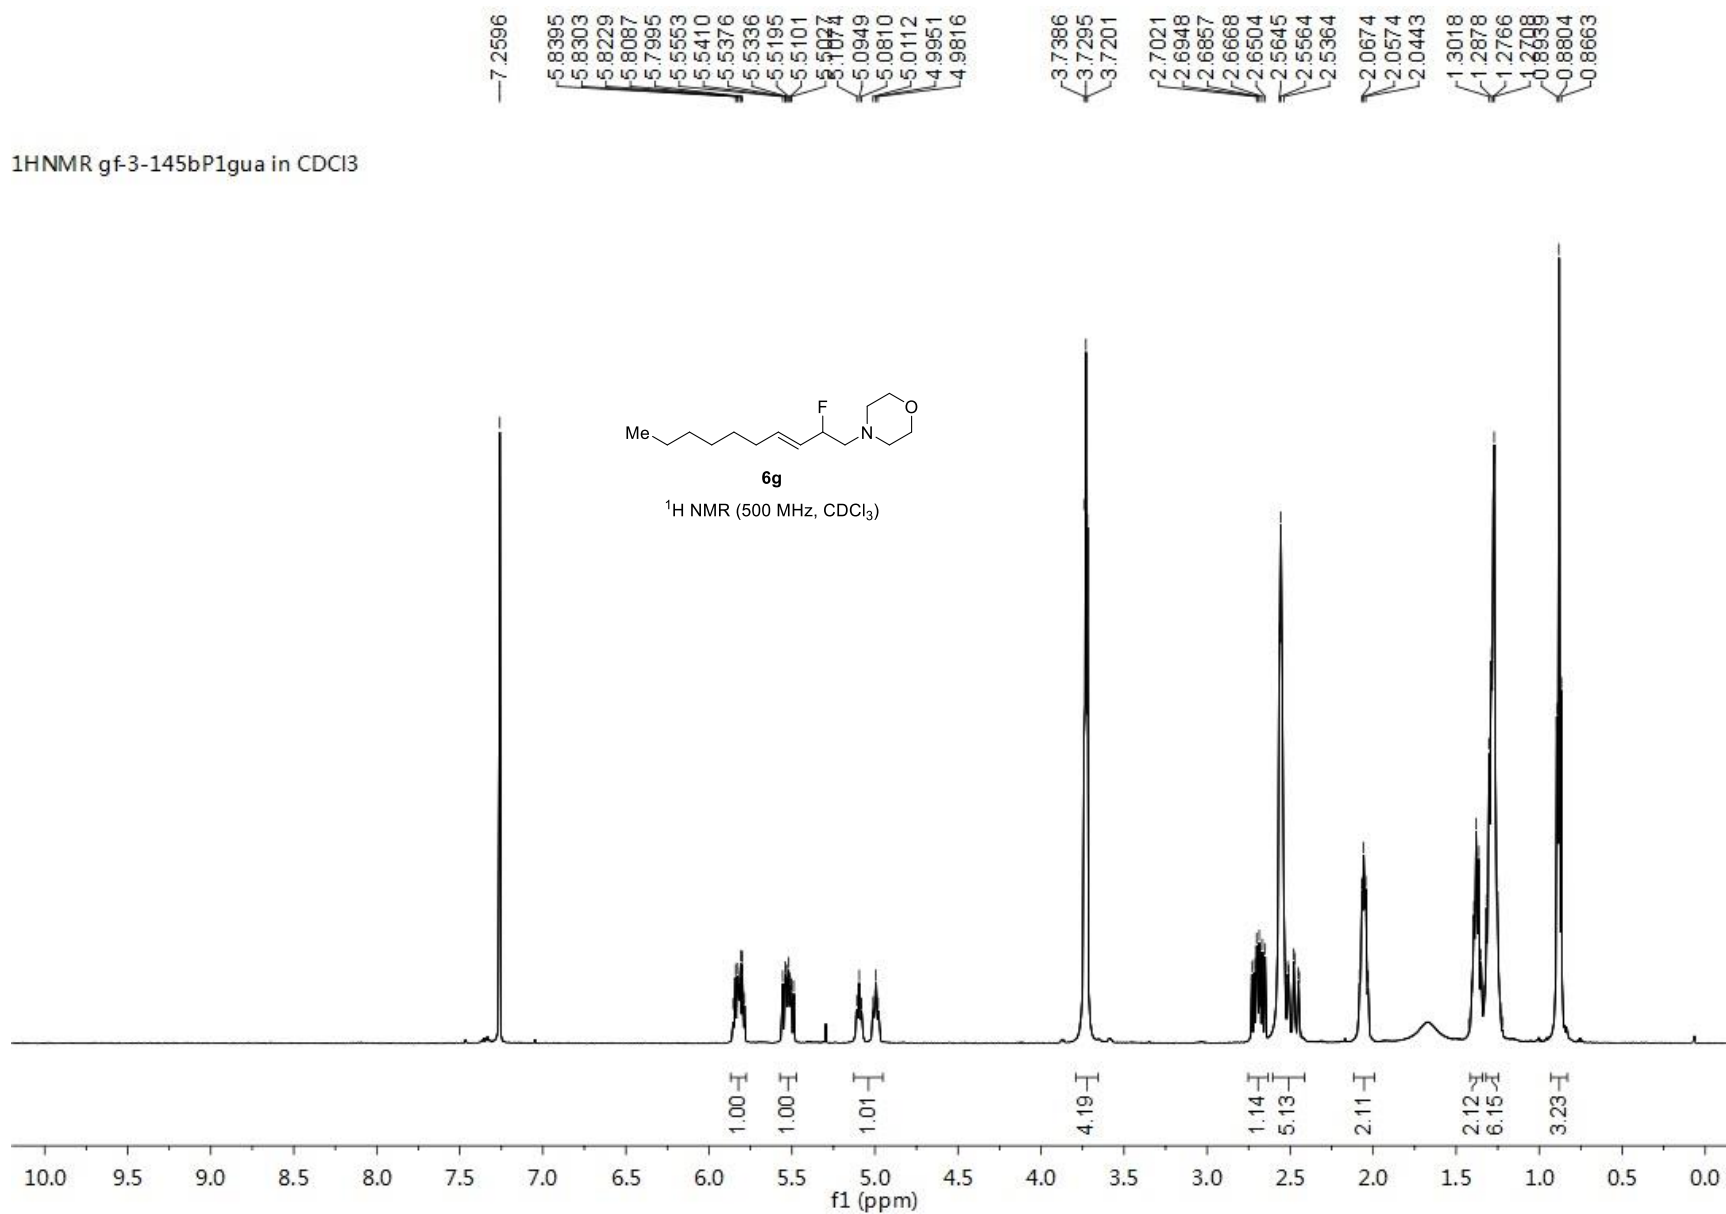

<sup>13</sup>C NMR gf-3-145bP1gua in CDCl<sub>3</sub>

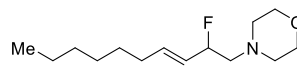

**6g**  
<sup>13</sup>C NMR (125 MHz, CDCl<sub>3</sub>)

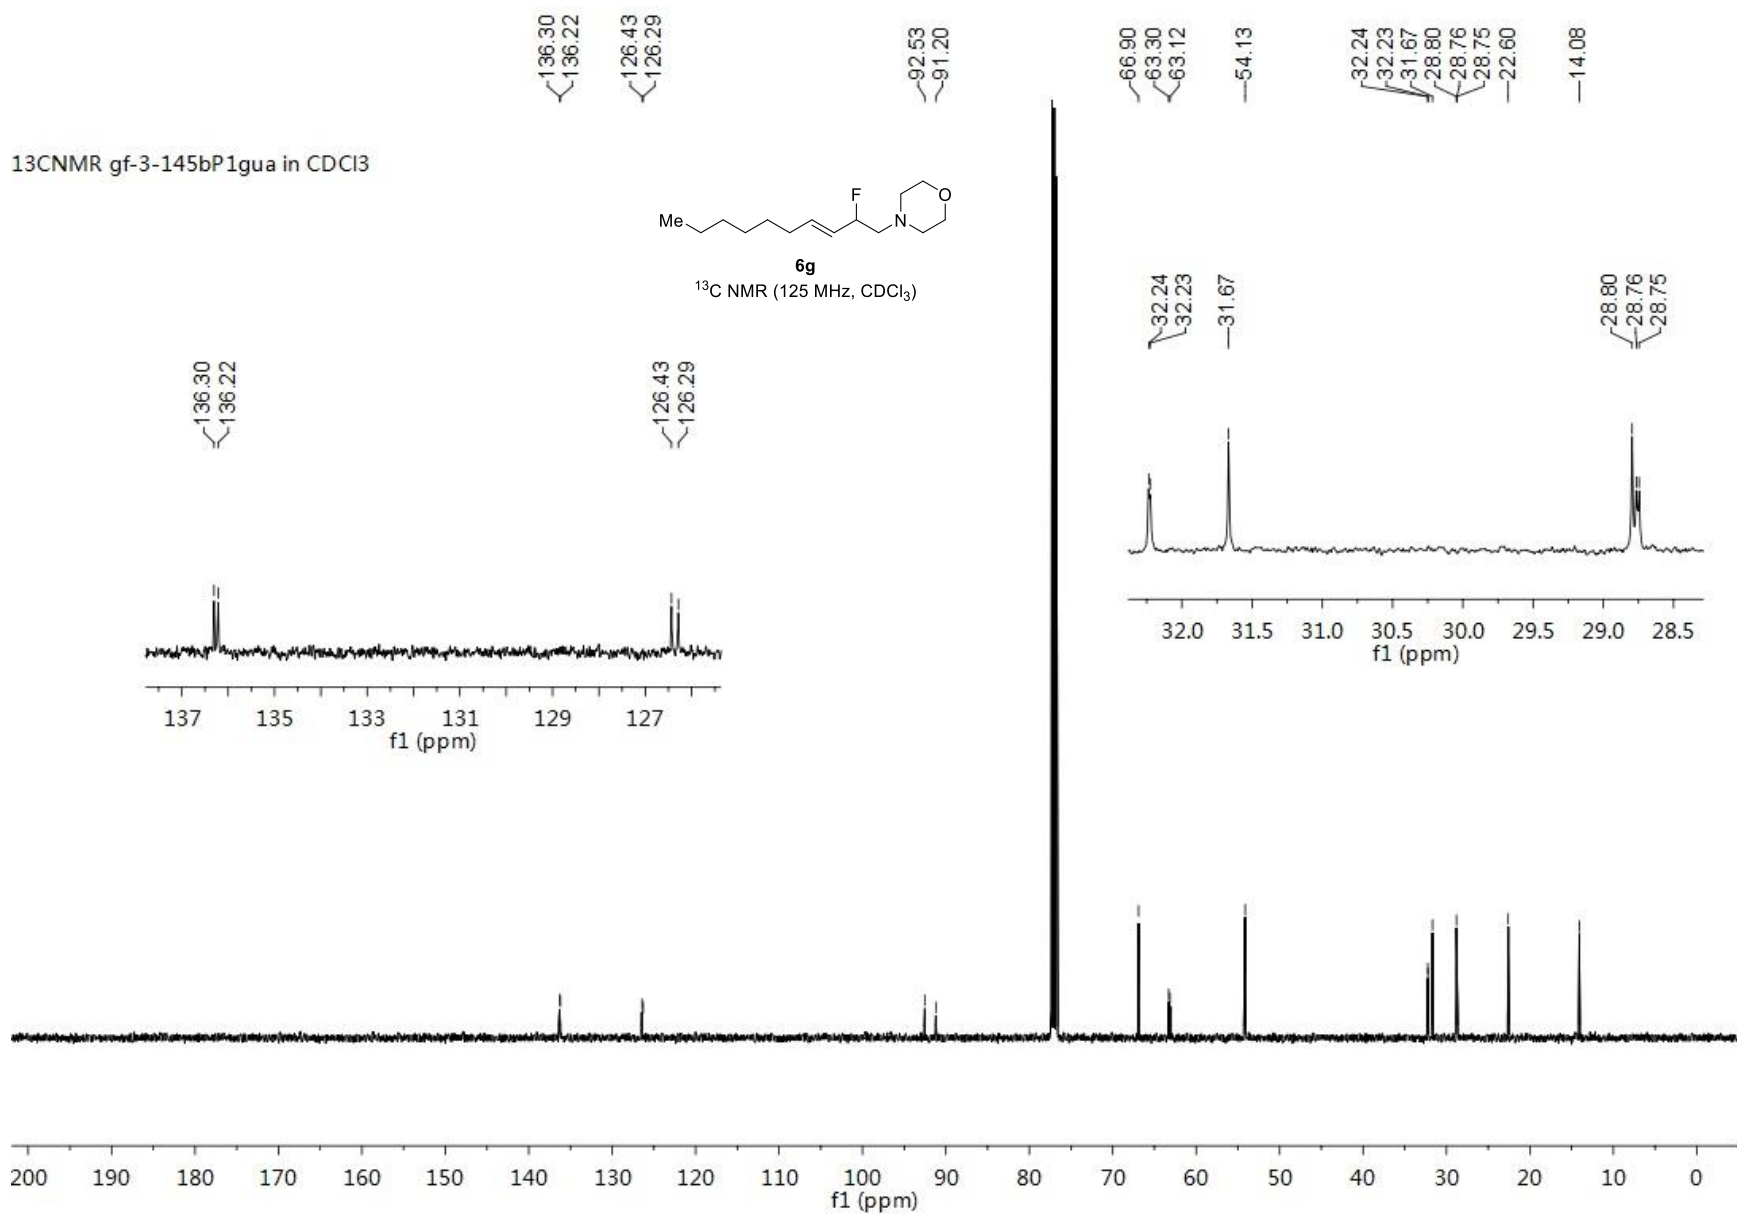

<sup>19</sup>F NMR gf-3-145bPgua in CDCl<sub>3</sub>

-171.3094

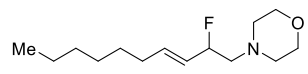

**6g**

<sup>19</sup>F NMR (471 MHz, CDCl<sub>3</sub>)

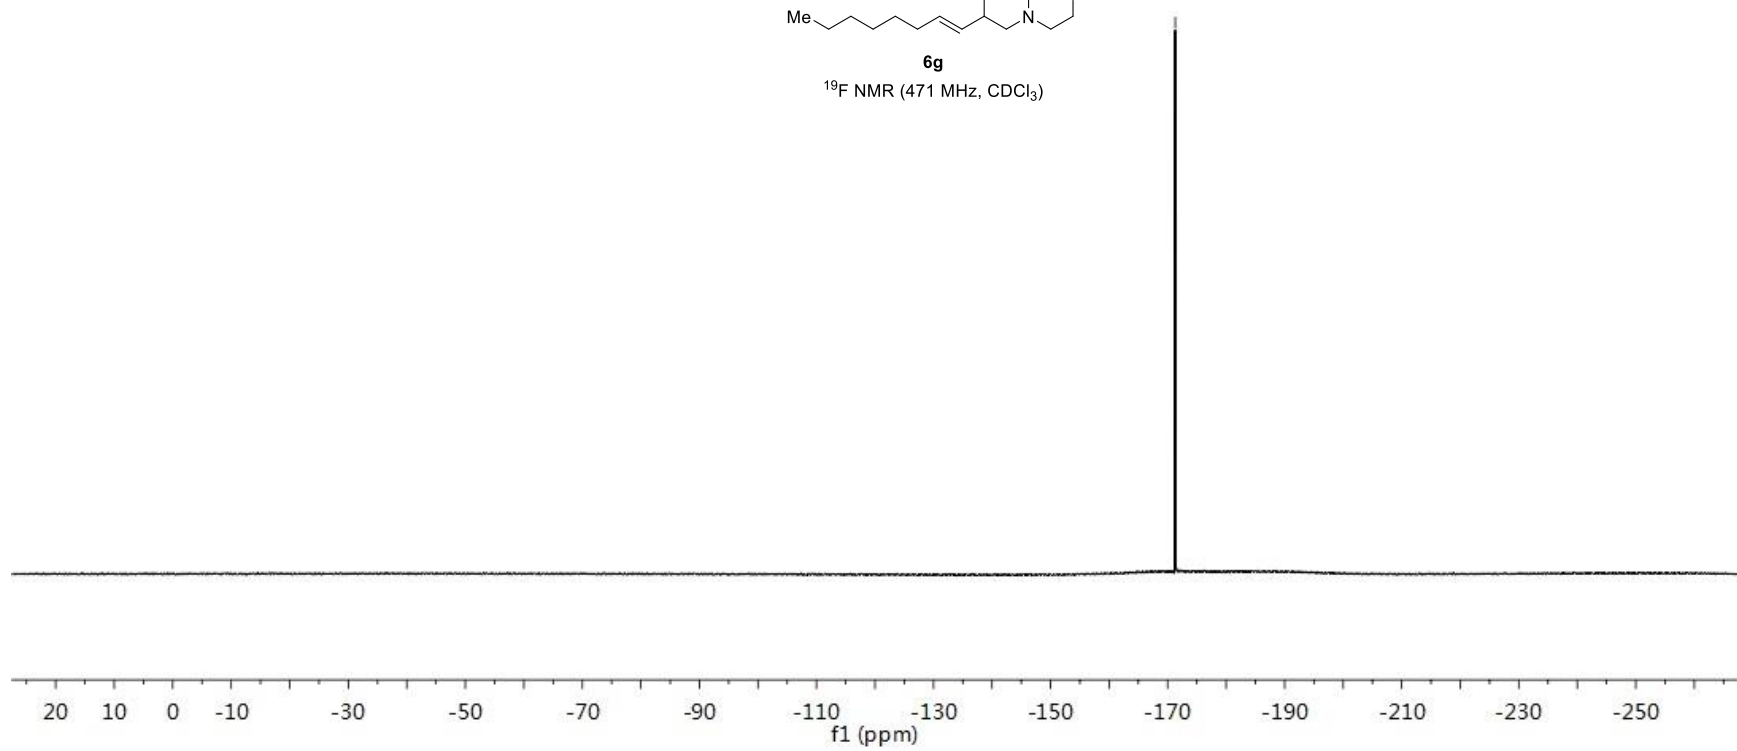

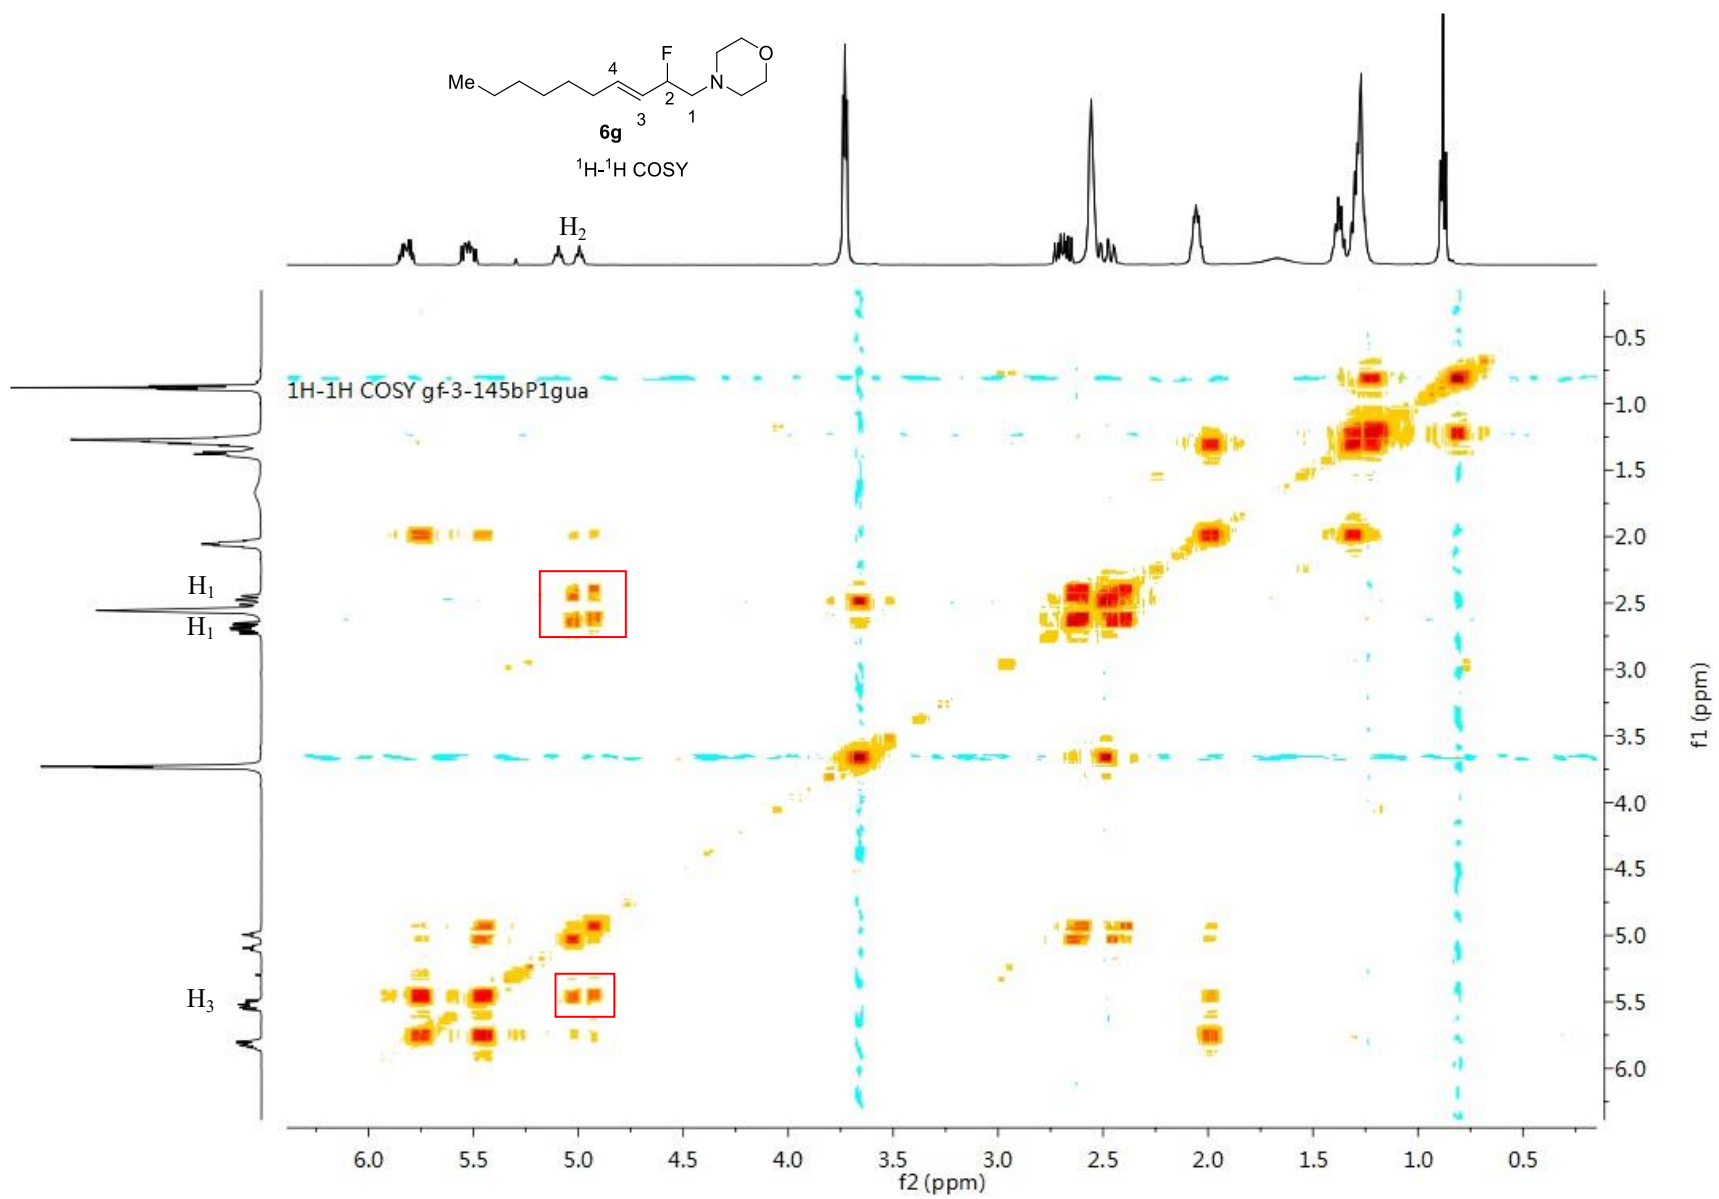

7.2602  
5.8009  
5.7943  
5.7877  
5.7824  
5.7752  
5.7697  
5.7631  
5.7573  
5.7513  
5.7365  
5.7241  
5.7142  
5.7016  
5.6930  
5.6826  
5.6699  
4.9285  
4.9164  
4.9027  
4.8908  
4.8315  
4.8188  
4.8063  
4.7933  
3.7296  
3.7204  
3.7112  
3.0187  
3.0117  
3.0073  
2.9998  
2.4478  
1.7579  
1.7491  
1.7386  
1.7328  
1.7236  
1.7153  
1.7048  
1.6895  
1.6860  
1.6707  
1.6493  
1.6395  
1.6305  
1.6202  
1.6111  
1.6027  
1.5920  
1.5786  
1.5679  
1.5588  
1.5506  
1.5400  
1.4385  
1.4251  
1.3924  
1.3764  
1.3565  
1.3458  
1.3166  
1.3056  
1.2891  
1.2799  
1.2745  
1.2518  
0.8938  
0.8807  
0.8666

<sup>1</sup>H NMR of 7g in CDCl<sub>3</sub>

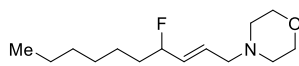

**7g**  
<sup>1</sup>H NMR (500 MHz, CDCl<sub>3</sub>)

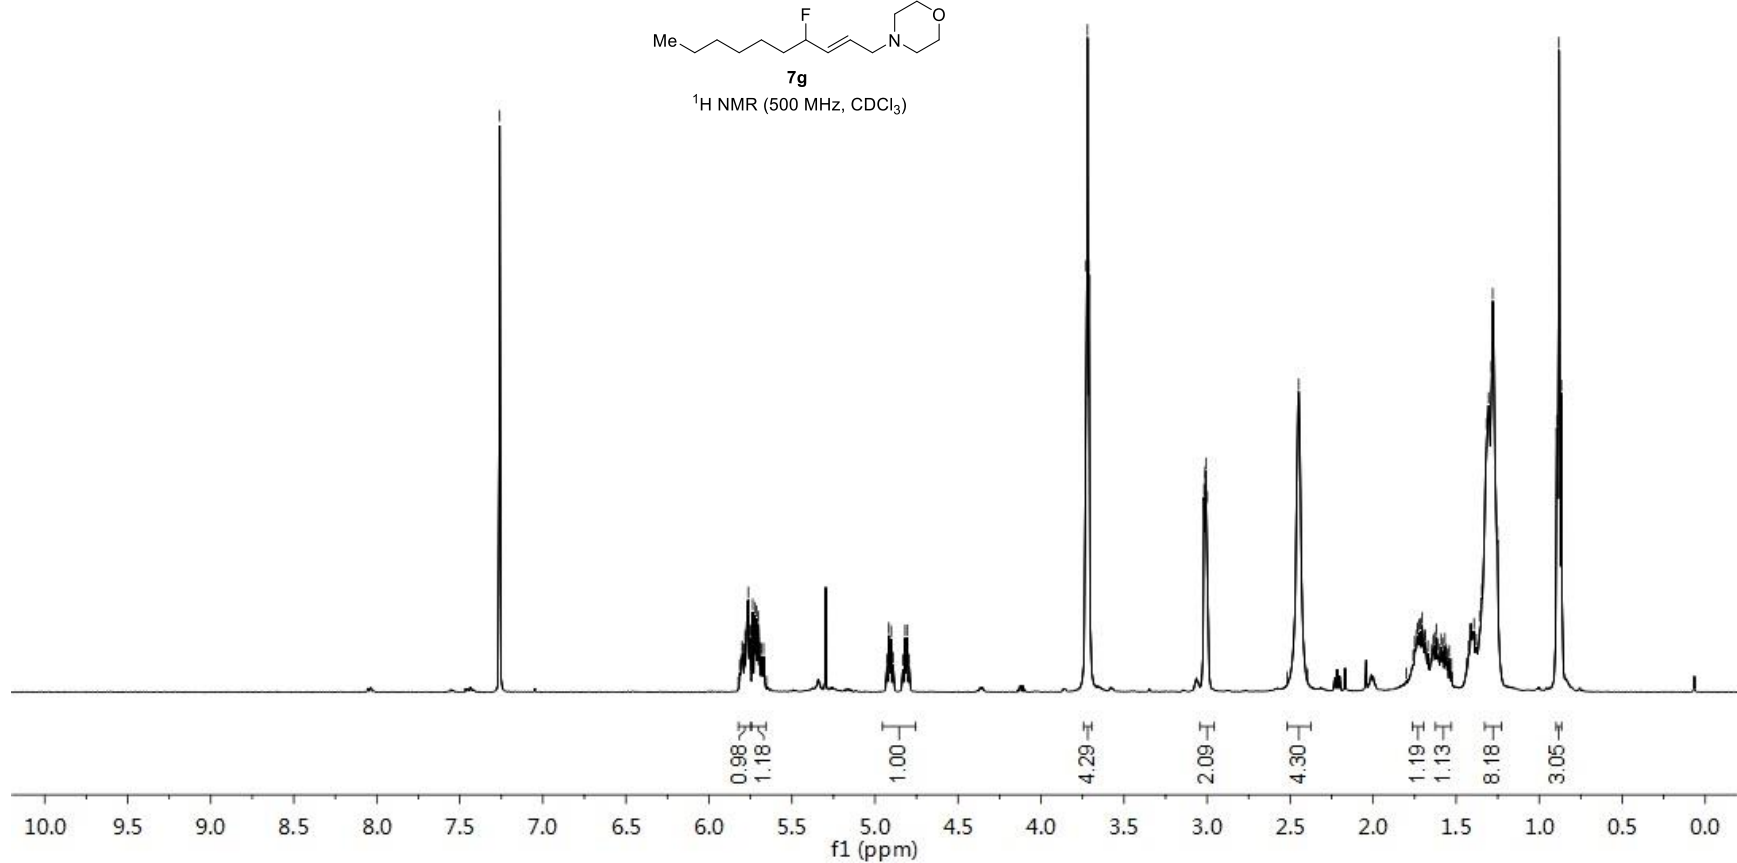

<sup>13</sup>CNMR gf-3-145bP2gua in CDCl<sub>3</sub>

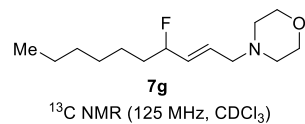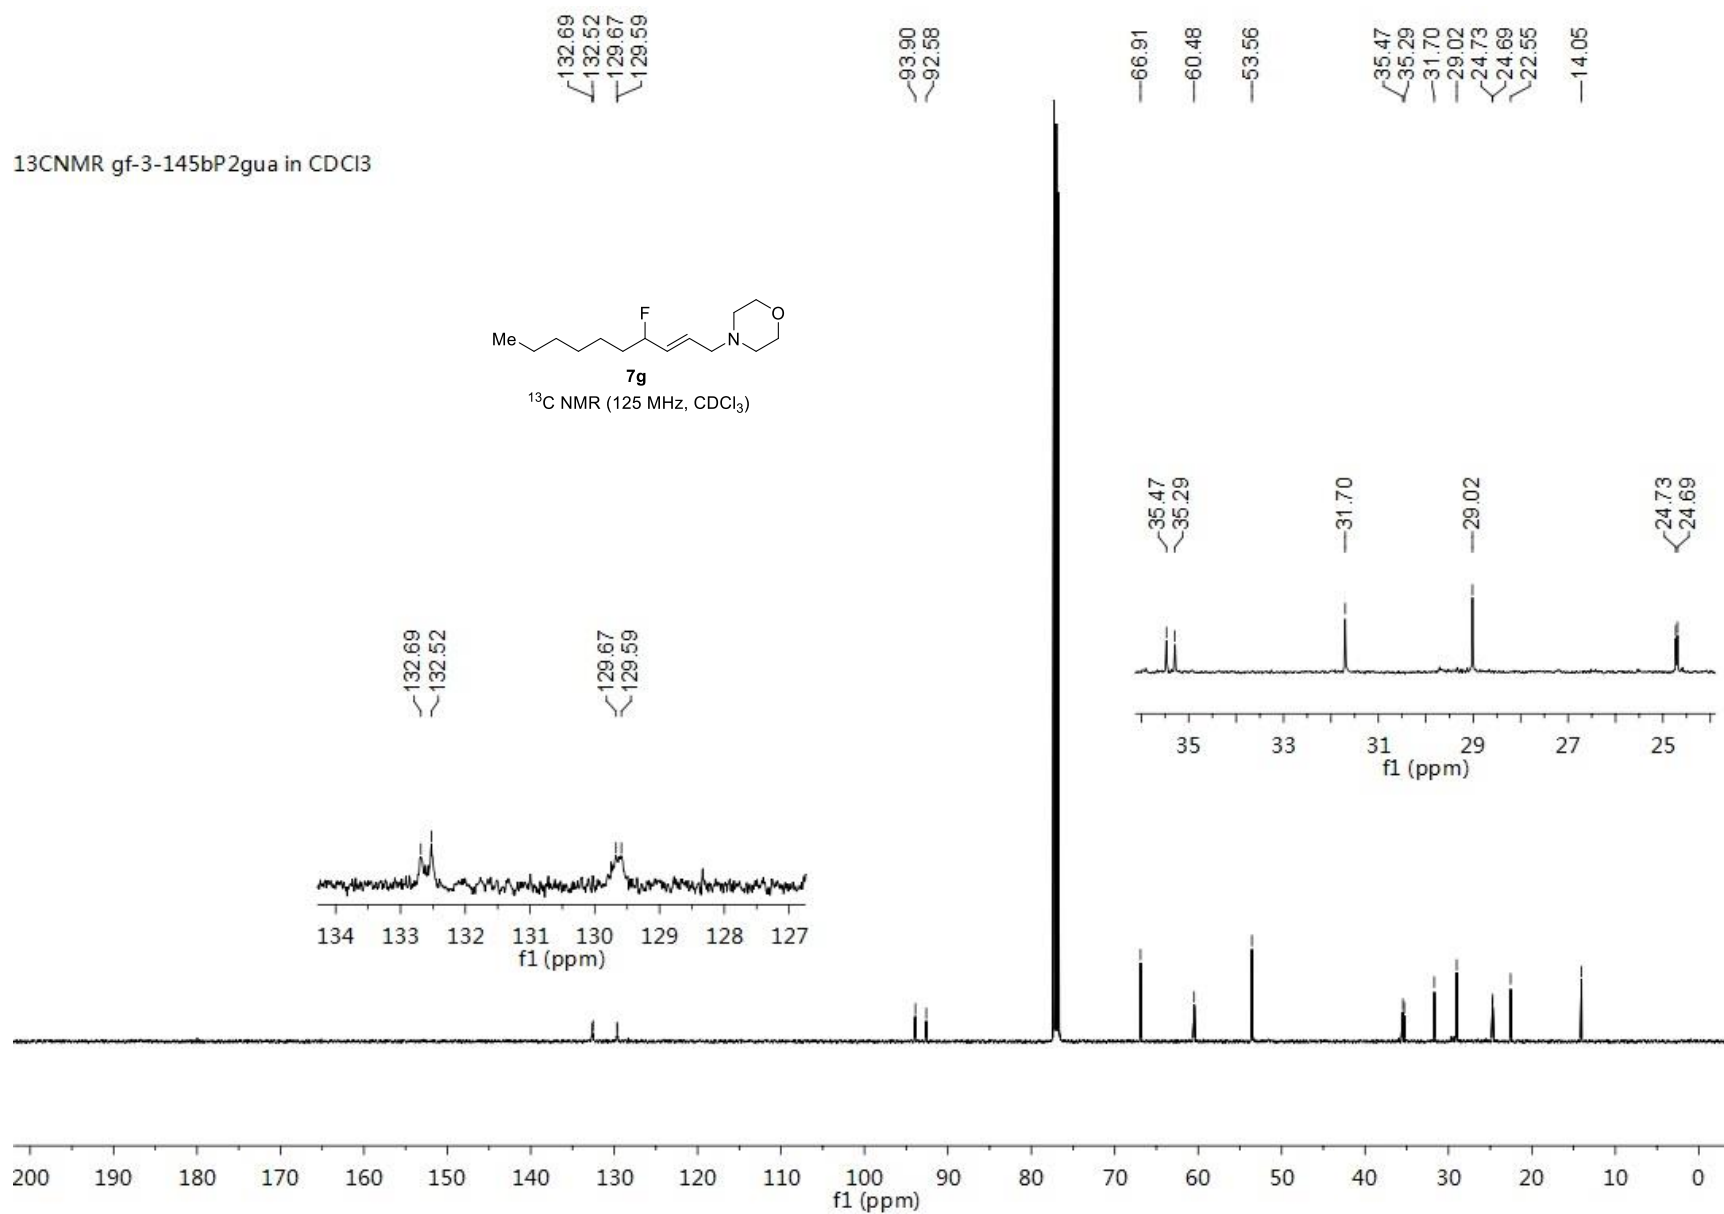

<sup>19</sup>F NMR gf-3-145bP2gua in CDCl<sub>3</sub>

---172.8292

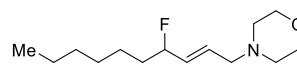

**7g**

<sup>19</sup>F NMR (471 MHz, CDCl<sub>3</sub>)

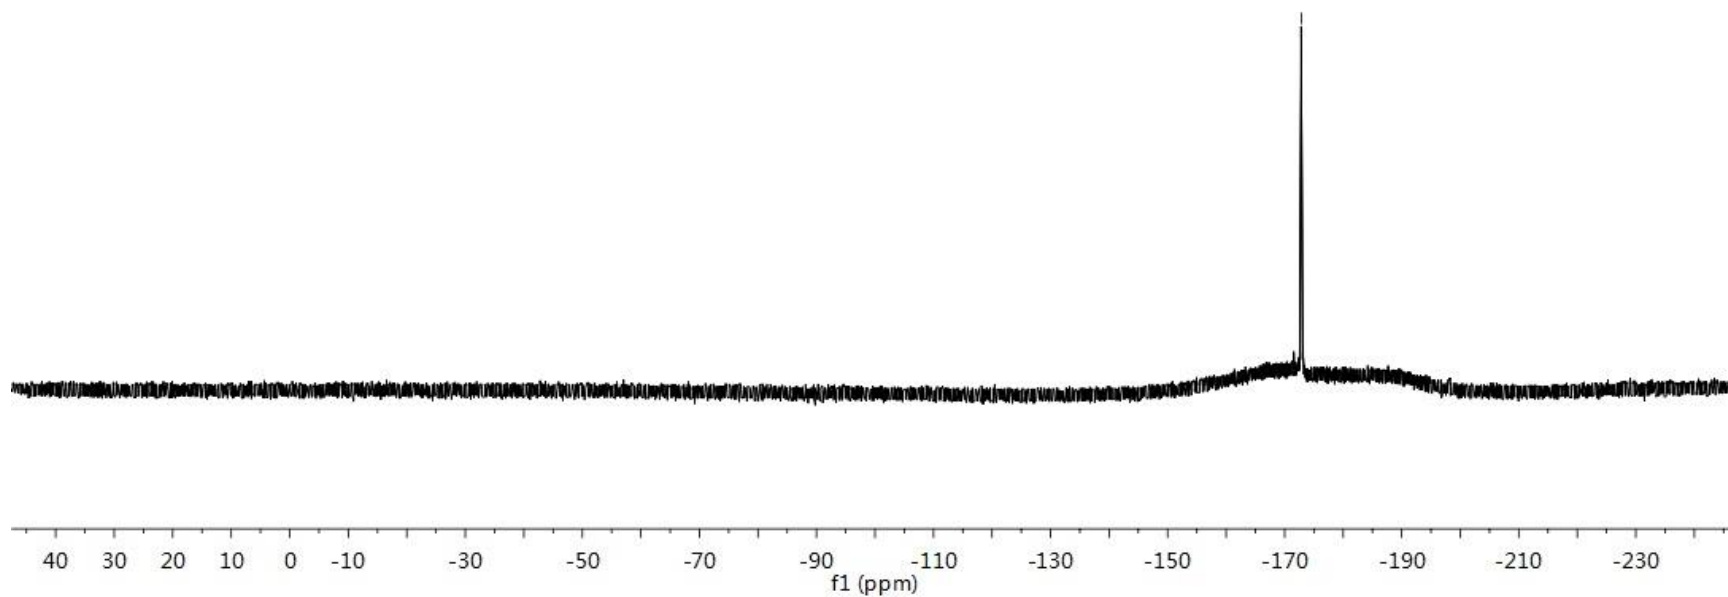

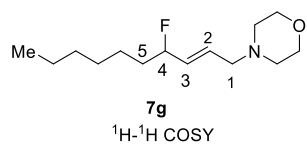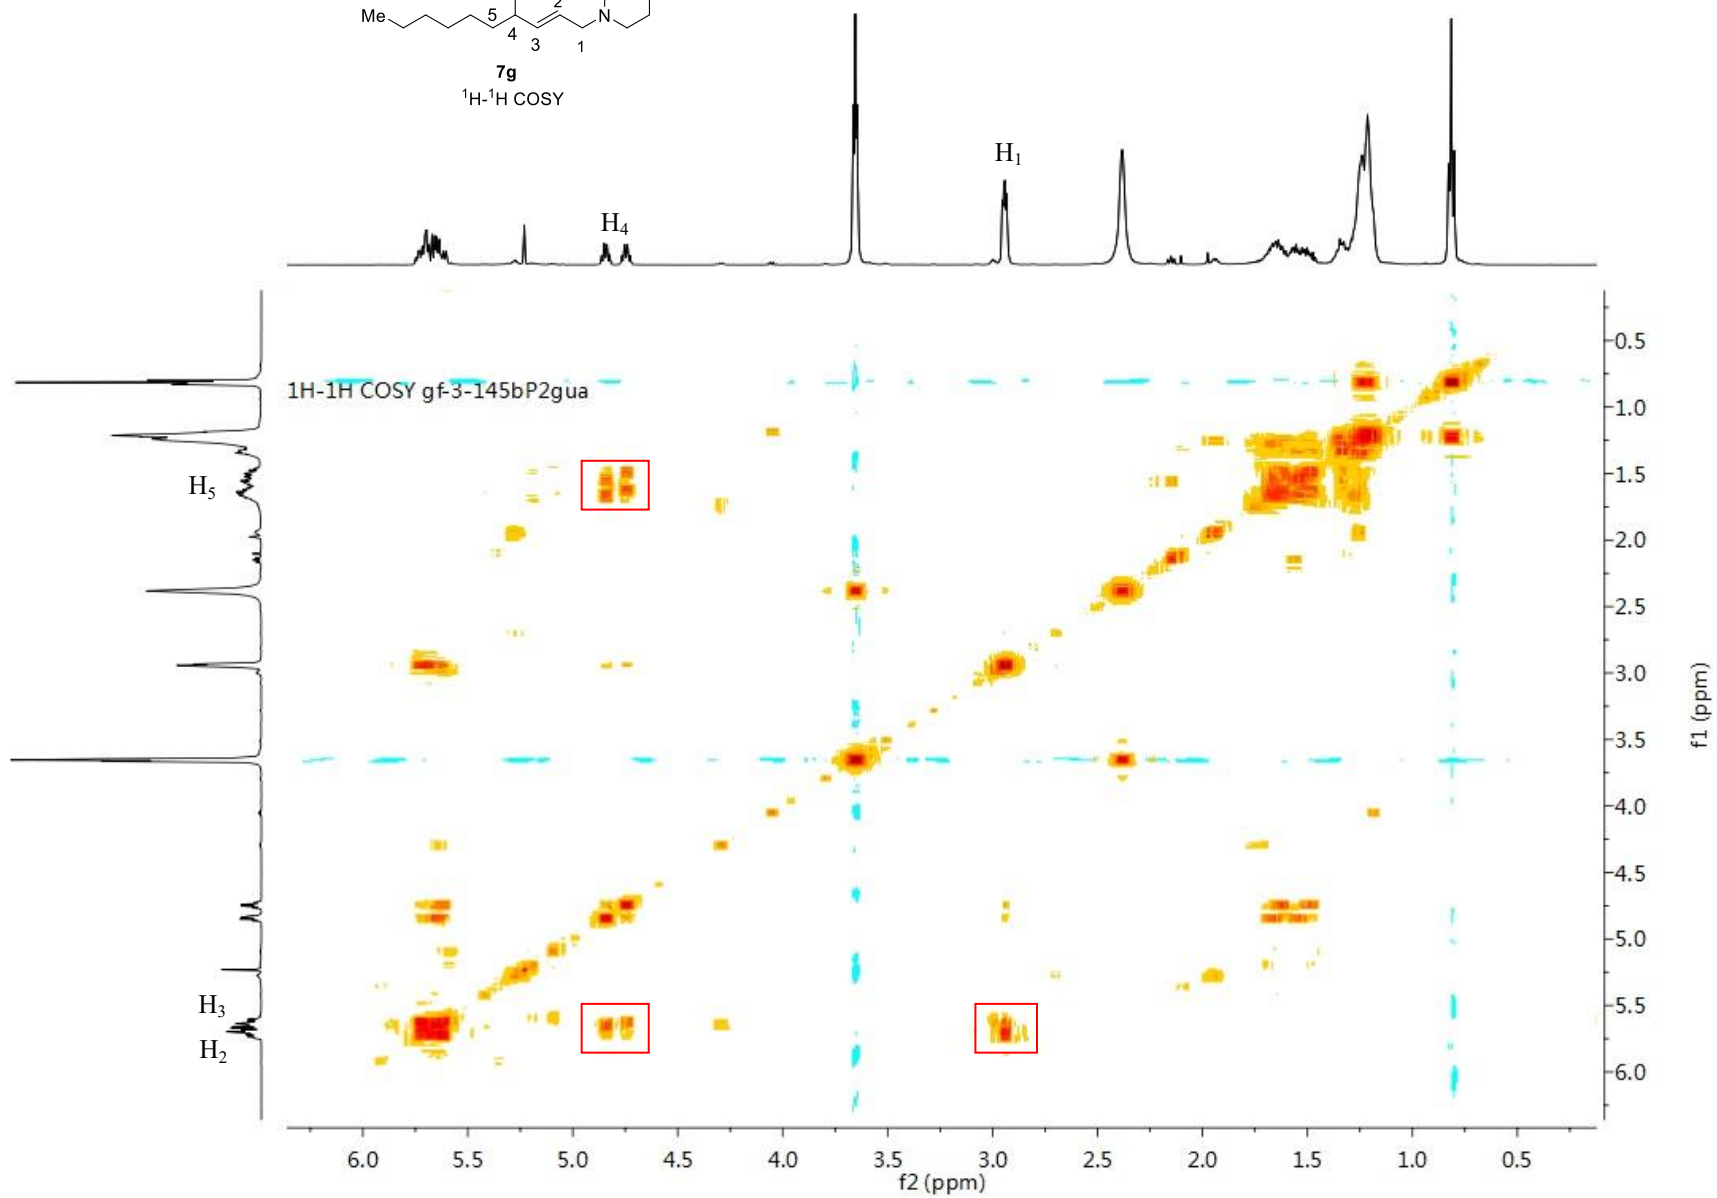



7.2599  
 5.7795  
 5.7764  
 5.7573  
 5.7483  
 5.7452  
 5.7362  
 5.5057  
 5.5032  
 5.4916  
 5.4890  
 5.4838  
 5.4812  
 5.4717  
 5.4698  
 5.4671  
 5.0778  
 4.9802  
 3.7345  
 3.7252  
 3.7159  
 2.7270  
 2.7105  
 2.6991  
 2.6919  
 2.6826  
 2.6753  
 2.6639  
 2.6474  
 2.5593  
 2.5506  
 2.5421  
 2.5273  
 2.5218  
 2.4993  
 2.4938  
 2.4635  
 2.4581  
 2.4355  
 2.4302  
 1.9842  
 1.9761  
 1.9691  
 1.9691  
 1.7374  
 1.7314  
 1.7180  
 1.6701  
 1.6669  
 1.6639  
 1.6607  
 1.6572  
 1.6453  
 1.6388  
 1.2859  
 1.2794  
 1.2729  
 1.2596  
 1.2538  
 1.2352  
 1.2286  
 1.1881  
 1.1696  
 1.1635  
 1.1571  
 1.1386  
 1.1074  
 1.0847  
 1.0808  
 1.0603  
 1.0579

<sup>1</sup>H NMR of 6h in CDCl<sub>3</sub>

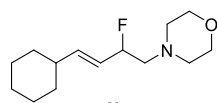

**6h**  
<sup>1</sup>H NMR (500 MHz, CDCl<sub>3</sub>)

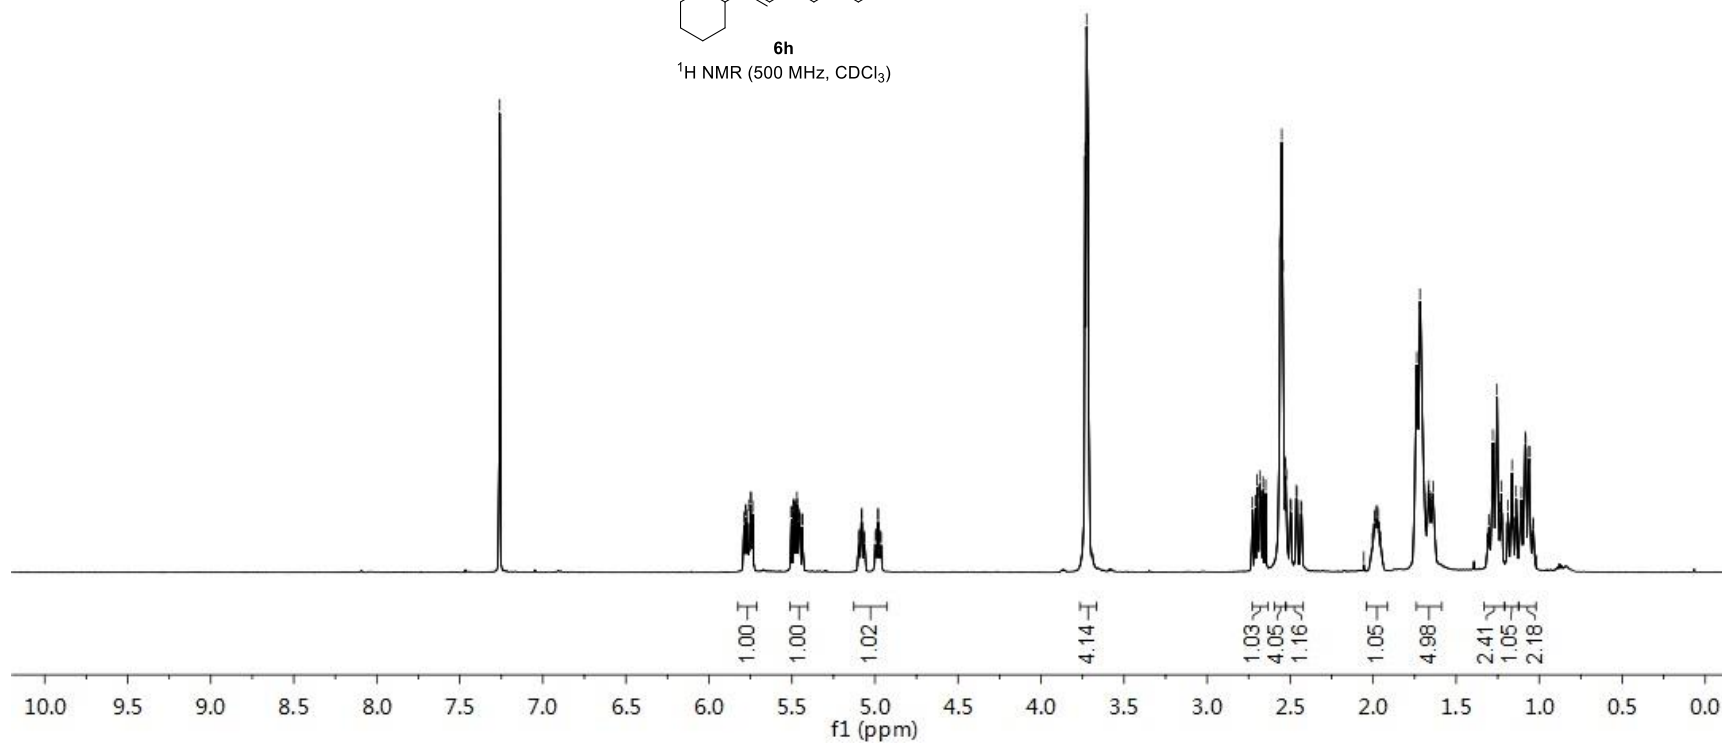

<sup>13</sup>CNMR gf-3-145aP1 in CDCl<sub>3</sub>

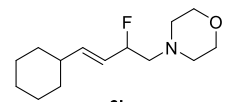

6h  
<sup>13</sup>C NMR (125 MHz, CDCl<sub>3</sub>)

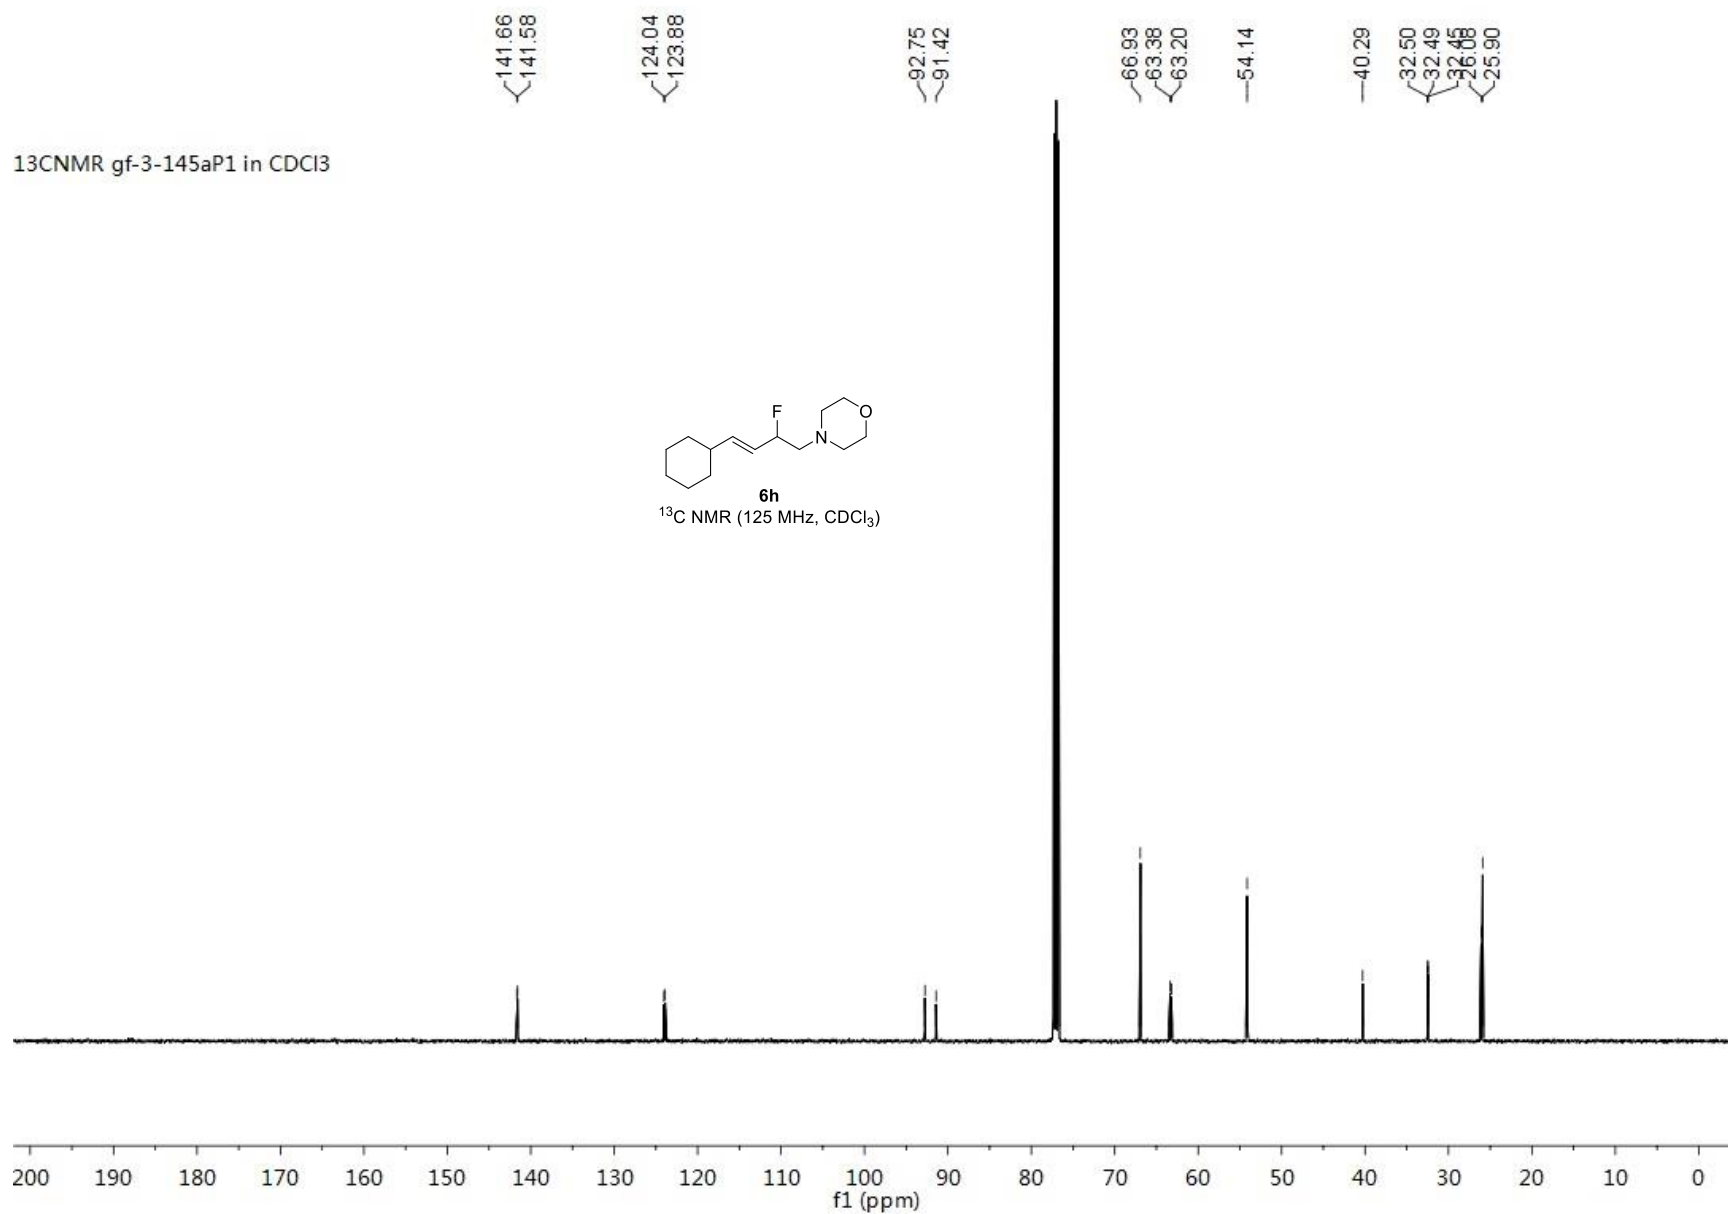

<sup>19</sup>F NMR gf-3-145aP1 in CDCl<sub>3</sub>

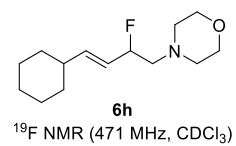

---171.4733



7.2596  
 5.7640  
 5.7565  
 5.7511  
 5.7445  
 5.7387  
 5.7329  
 5.7205  
 5.7074  
 5.6960  
 5.6924  
 5.6892  
 5.6840  
 5.6785  
 4.6259  
 4.6130  
 4.5428  
 4.5294  
 4.5161  
 3.7276  
 3.7184  
 3.7092  
 3.0274  
 3.0202  
 3.0163  
 3.0080  
 2.4407  
 1.8734  
 1.8478  
 1.7707  
 1.7456  
 1.6798  
 1.6554  
 1.5815  
 1.5749  
 1.5684  
 1.5576  
 1.5517  
 1.5451  
 1.5382  
 1.2671  
 1.2611  
 1.2532  
 1.2488  
 1.2422  
 1.2362  
 1.2299  
 1.2226  
 1.2167  
 1.2107  
 1.2048  
 1.1973  
 1.1915  
 1.1854  
 1.1773  
 1.1713  
 1.1593  
 1.1530  
 1.1464  
 1.1348  
 1.1281  
 1.1212  
 1.0530  
 1.0462  
 1.0400  
 1.0282  
 1.0217  
 1.0154  
 0.9977  
 0.9912

<sup>1</sup>H NMR of 7h in CDCl<sub>3</sub>

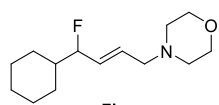

<sup>1</sup>H NMR (500 MHz, CDCl<sub>3</sub>)

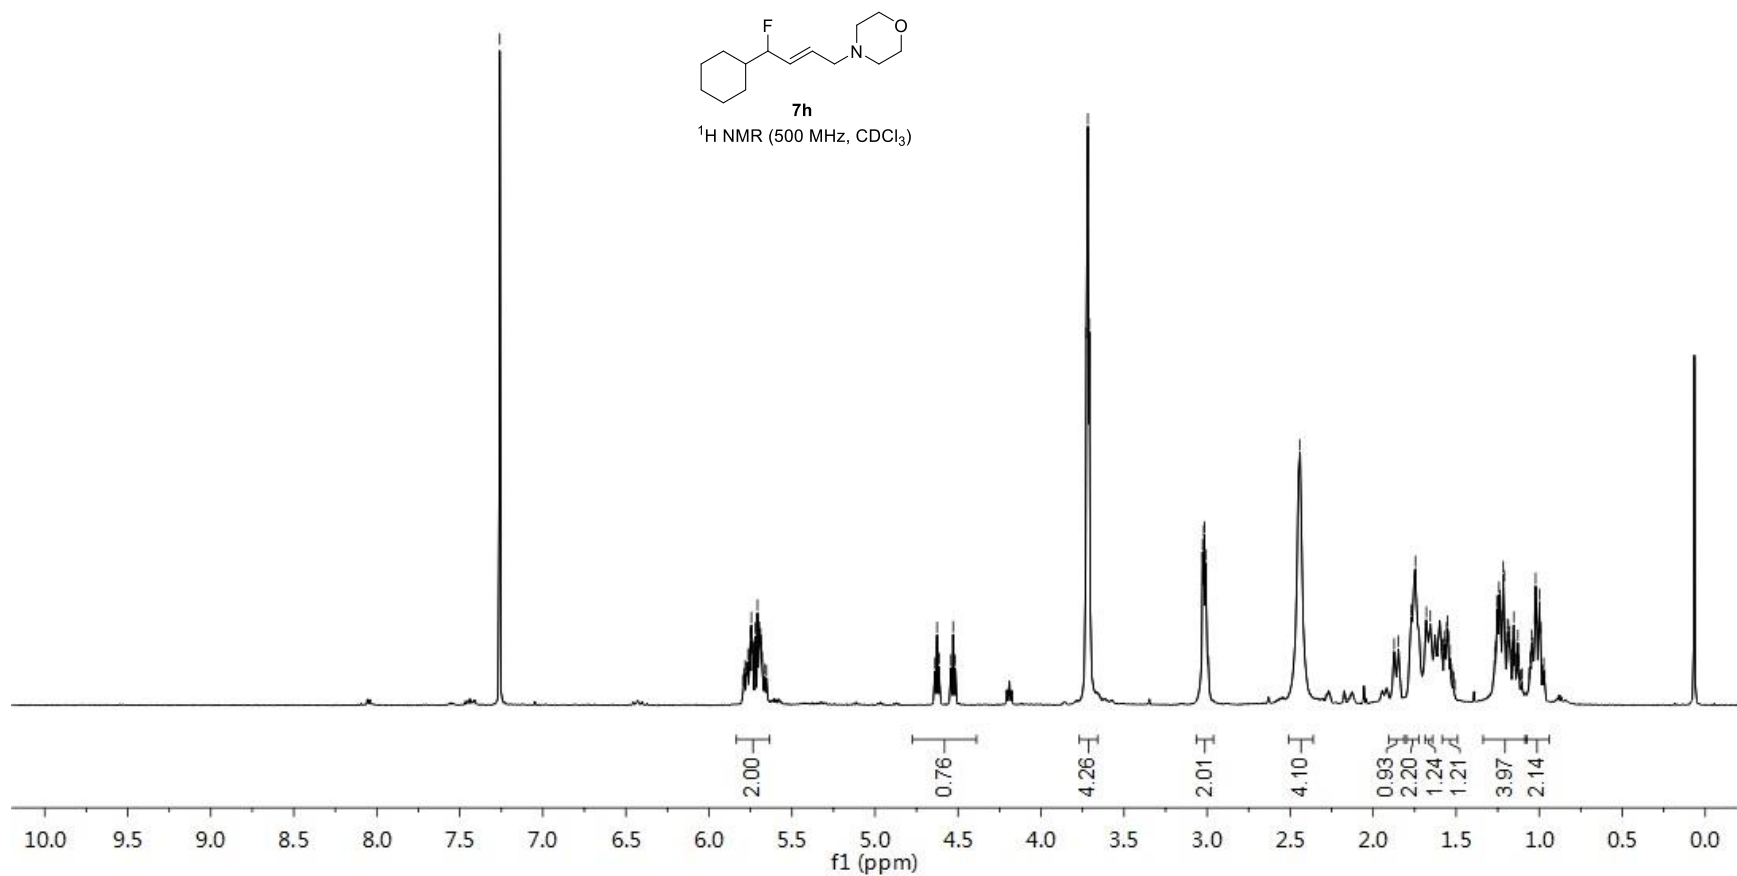

<sup>13</sup>C NMR gf-3-145aP2gua in CDCl<sub>3</sub>

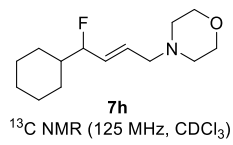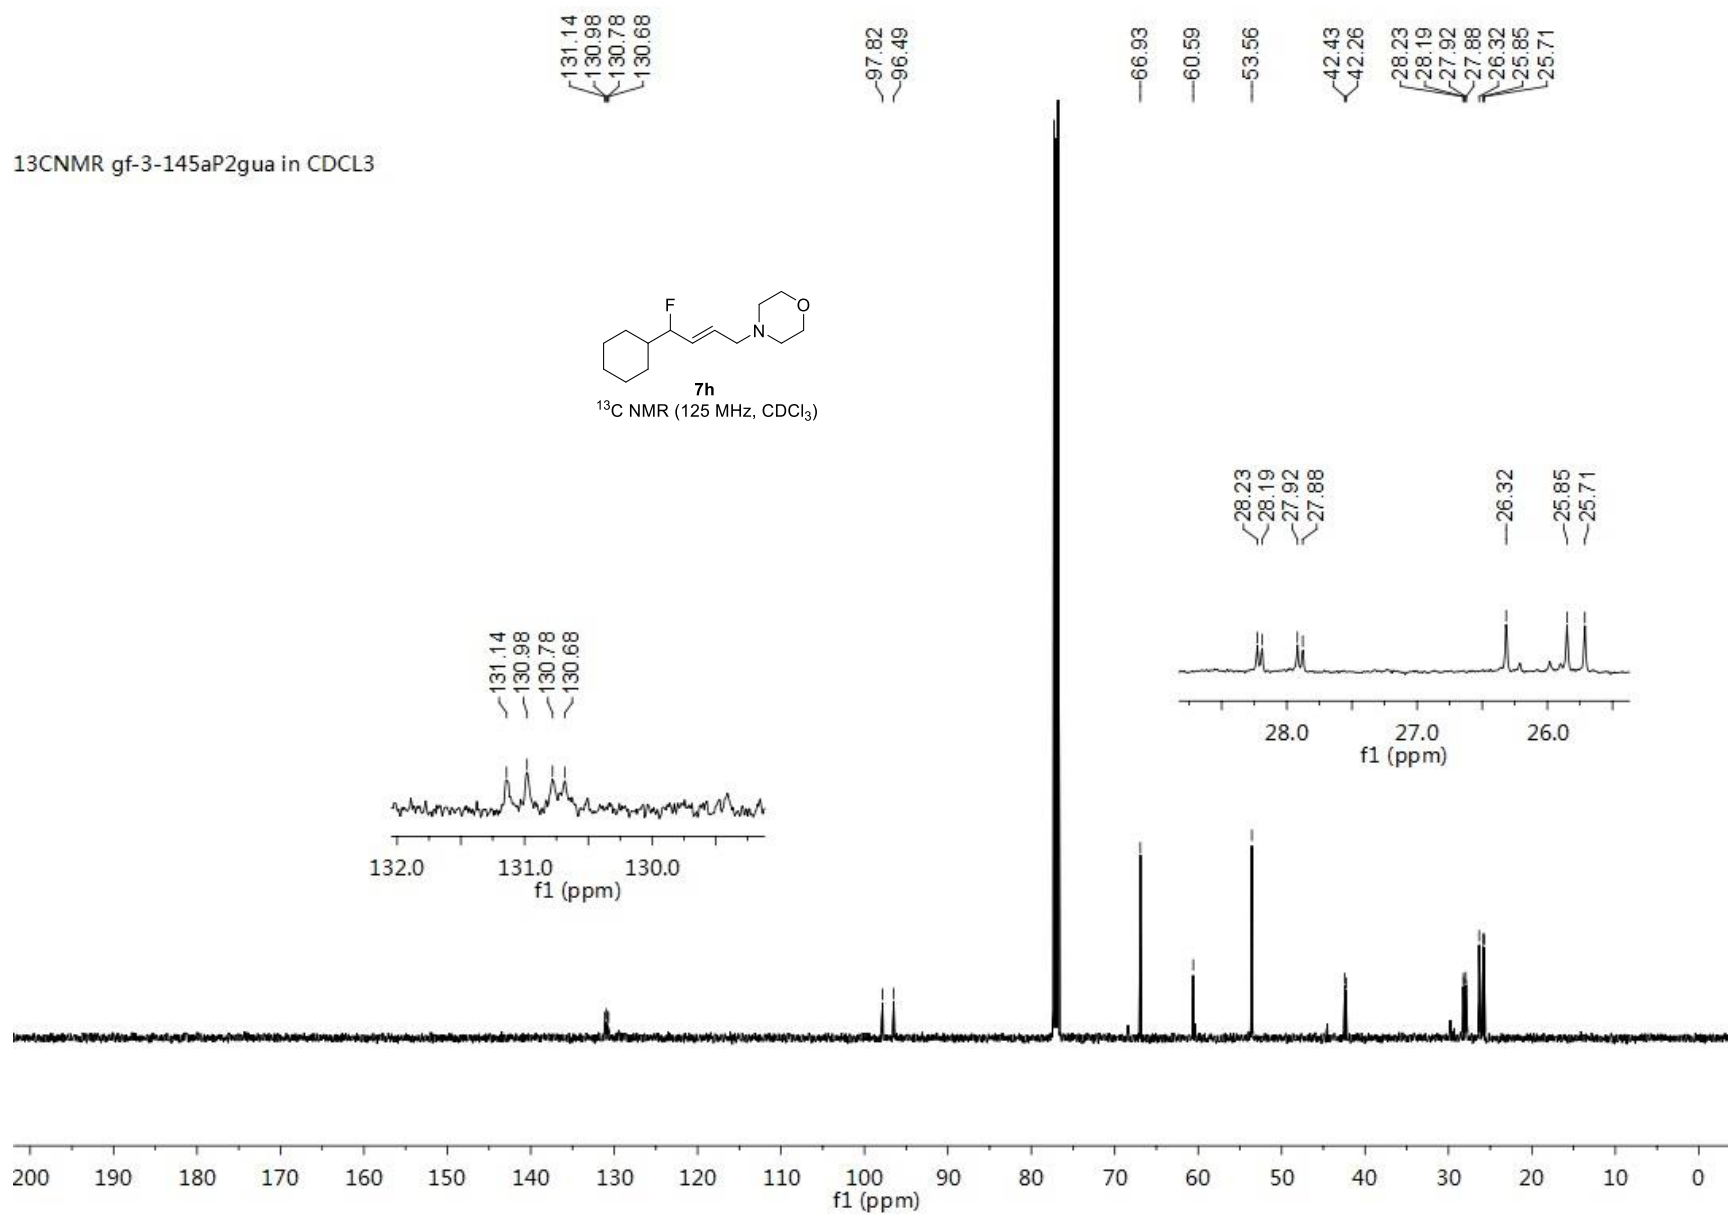

<sup>19</sup>F NMR gf-3-145aP2 in CDCl<sub>3</sub>

---178.4836

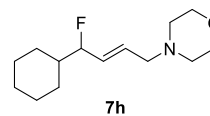

<sup>19</sup>F NMR (471 MHz, CDCl<sub>3</sub>)

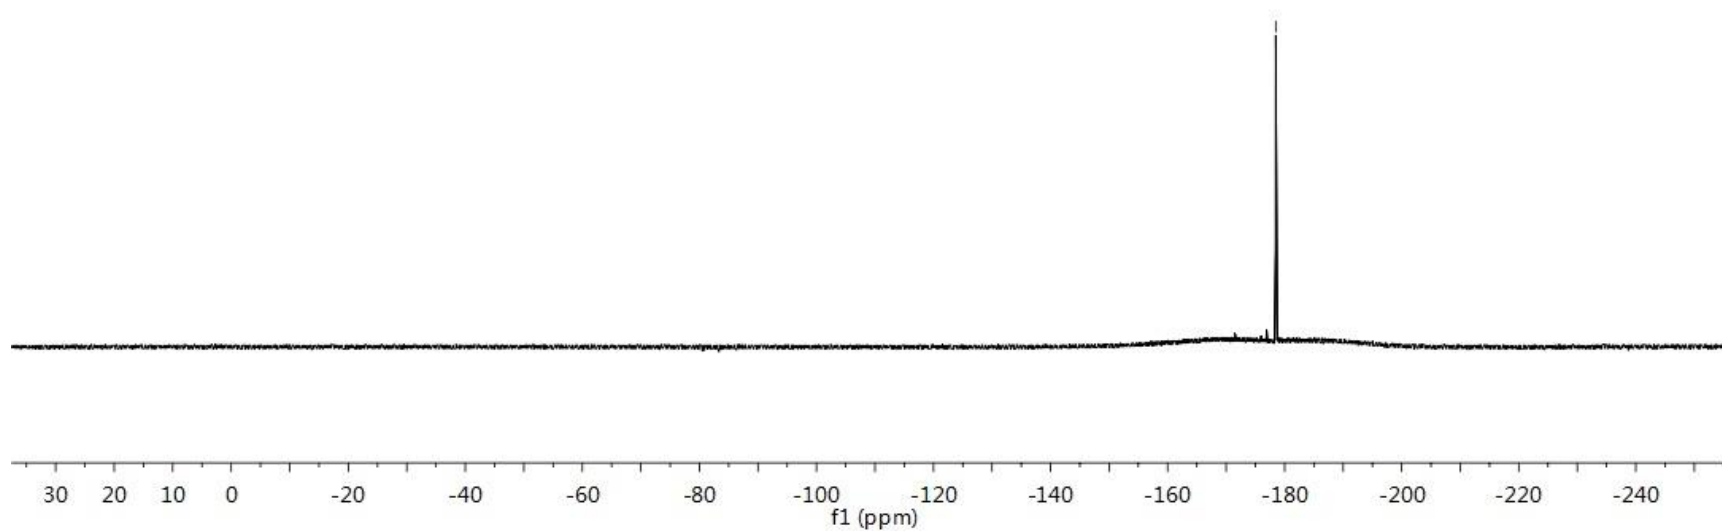

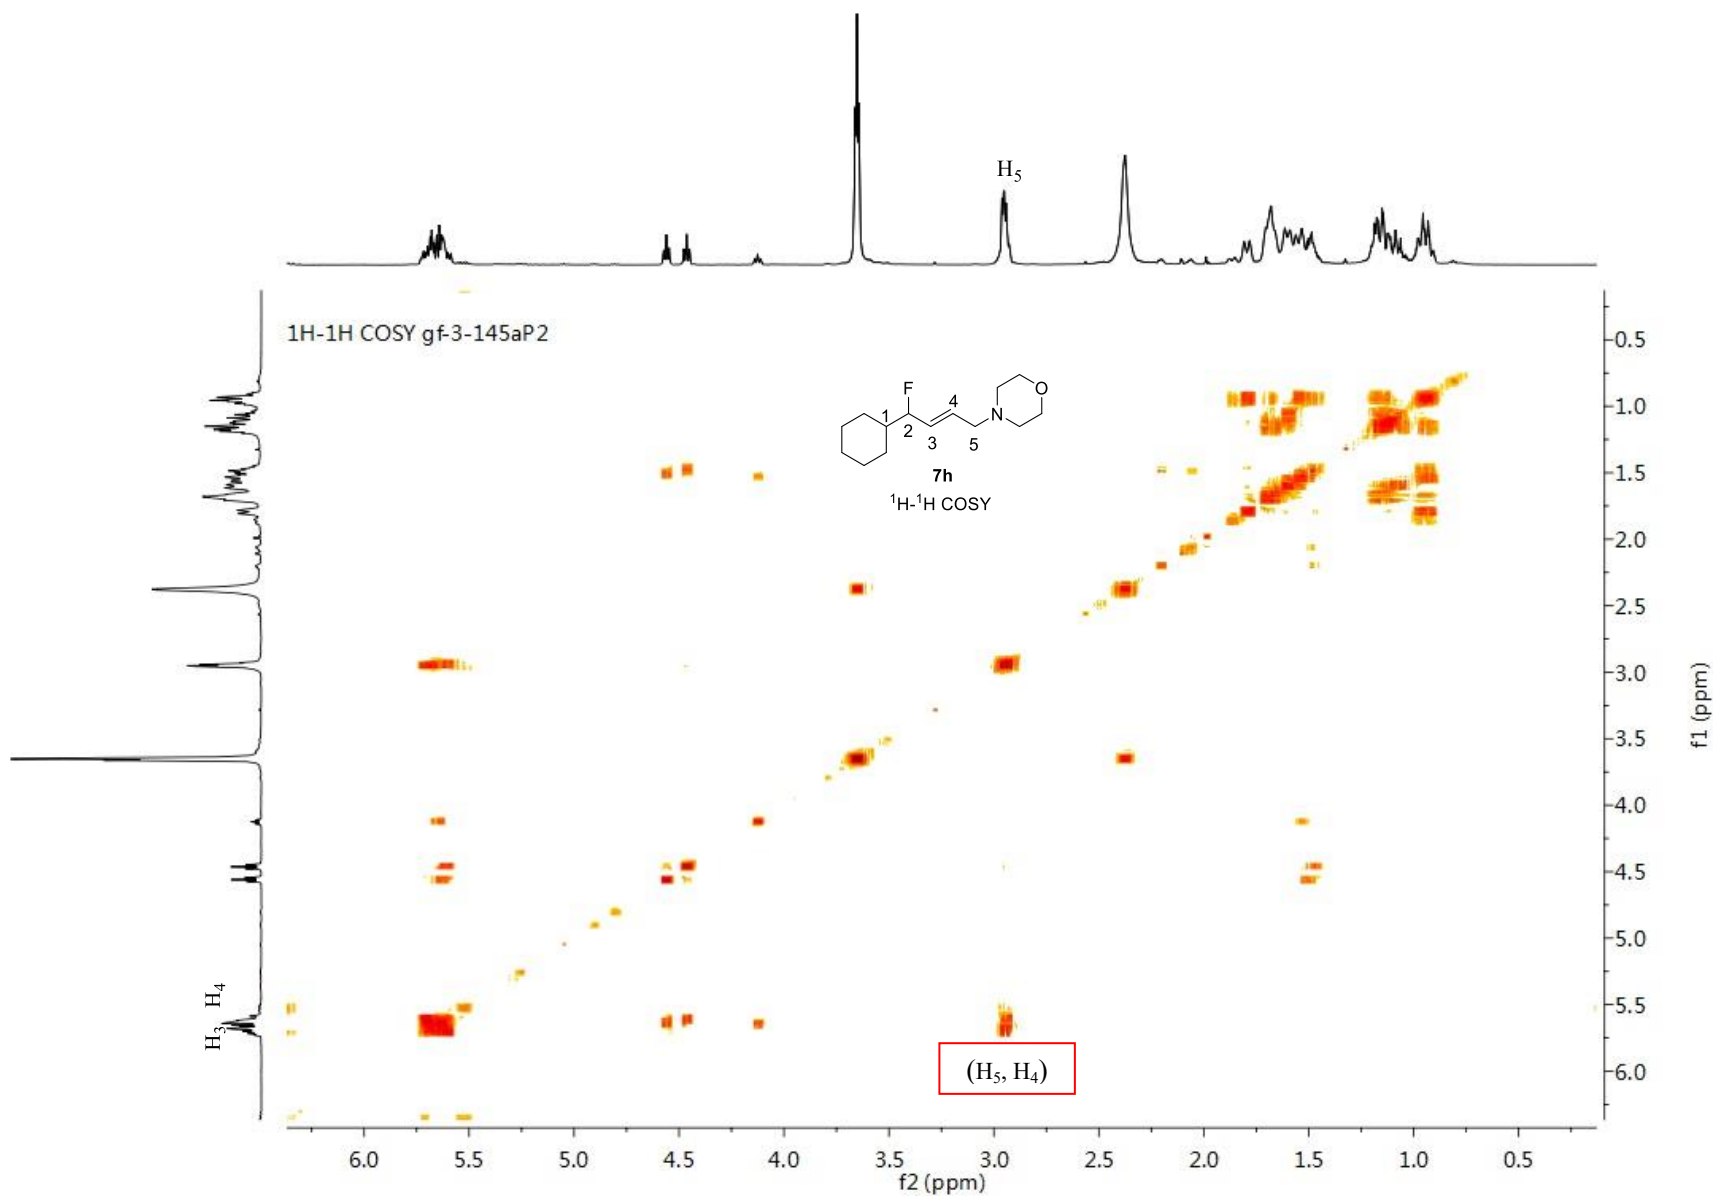

7.3789  
7.3609  
7.3533  
7.3390  
7.3300  
7.3217  
7.3130  
7.3033  
7.2960  
7.2599  
5.9058  
5.8974  
5.8932  
5.8873  
5.8831  
5.8747  
5.4003  
5.3976  
5.3948  
5.3657  
5.3630  
5.3602  
5.2786  
5.2571  
5.1324  
5.1109  
5.0498  
5.0399  
5.0344  
3.5346  
3.5255  
2.7369  
2.7209  
2.7085  
2.6995  
2.6926  
2.6836  
2.6713  
2.6553  
2.6044  
2.5989  
2.5760  
2.5704  
2.5415  
2.5365  
2.5146  
2.5090  
2.4662

<sup>1</sup>H NMR of gf-3-258P3 in CDCl<sub>3</sub>

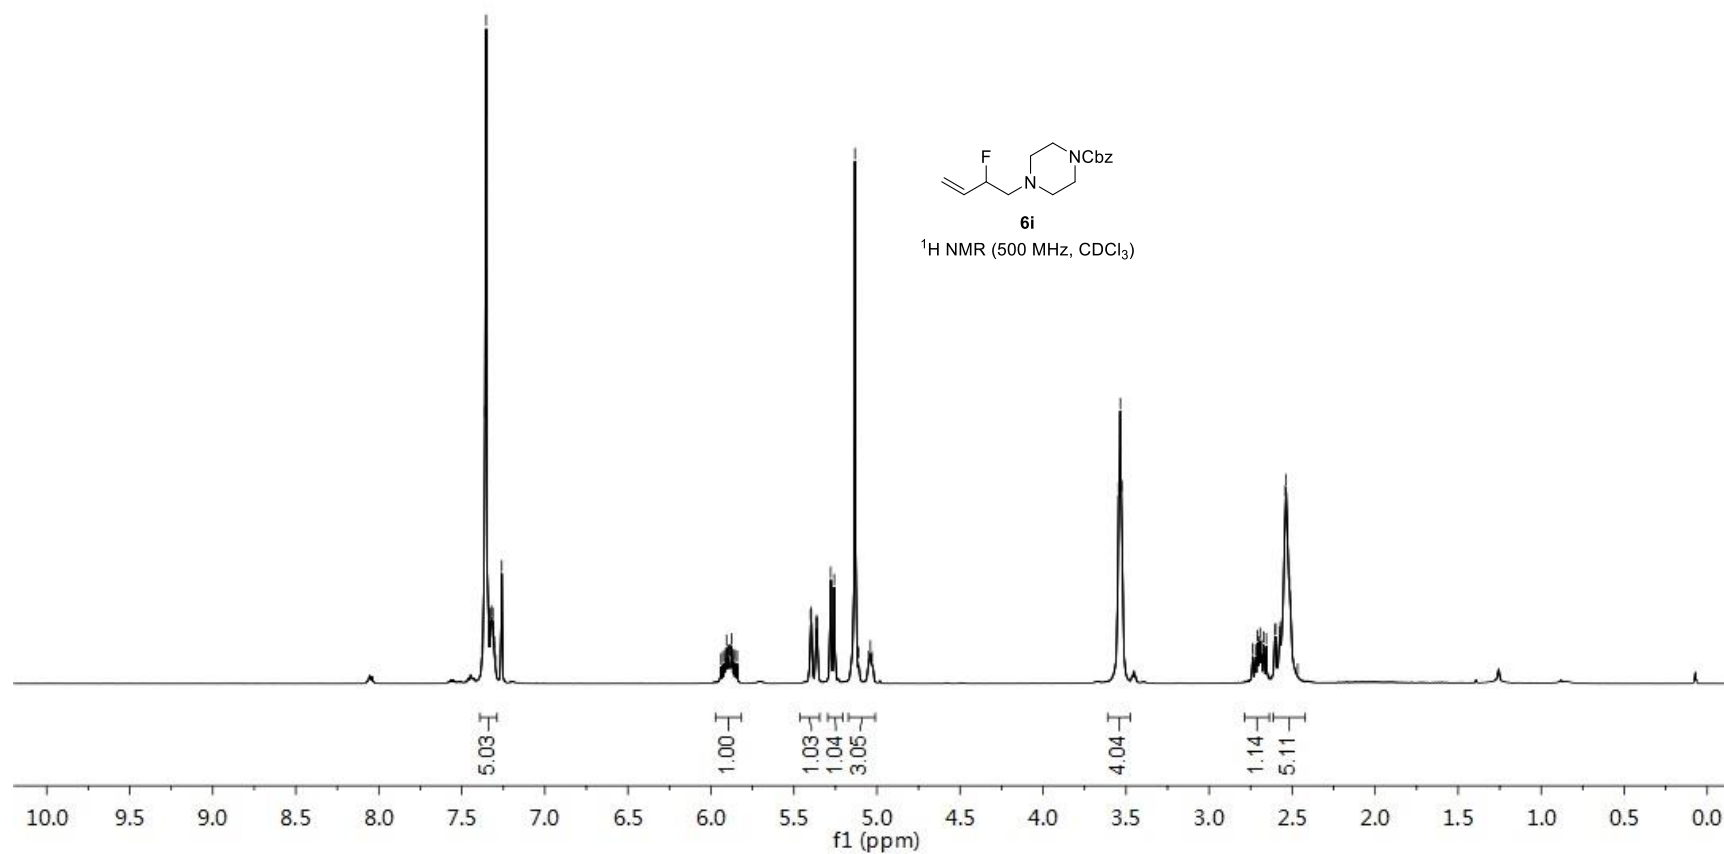



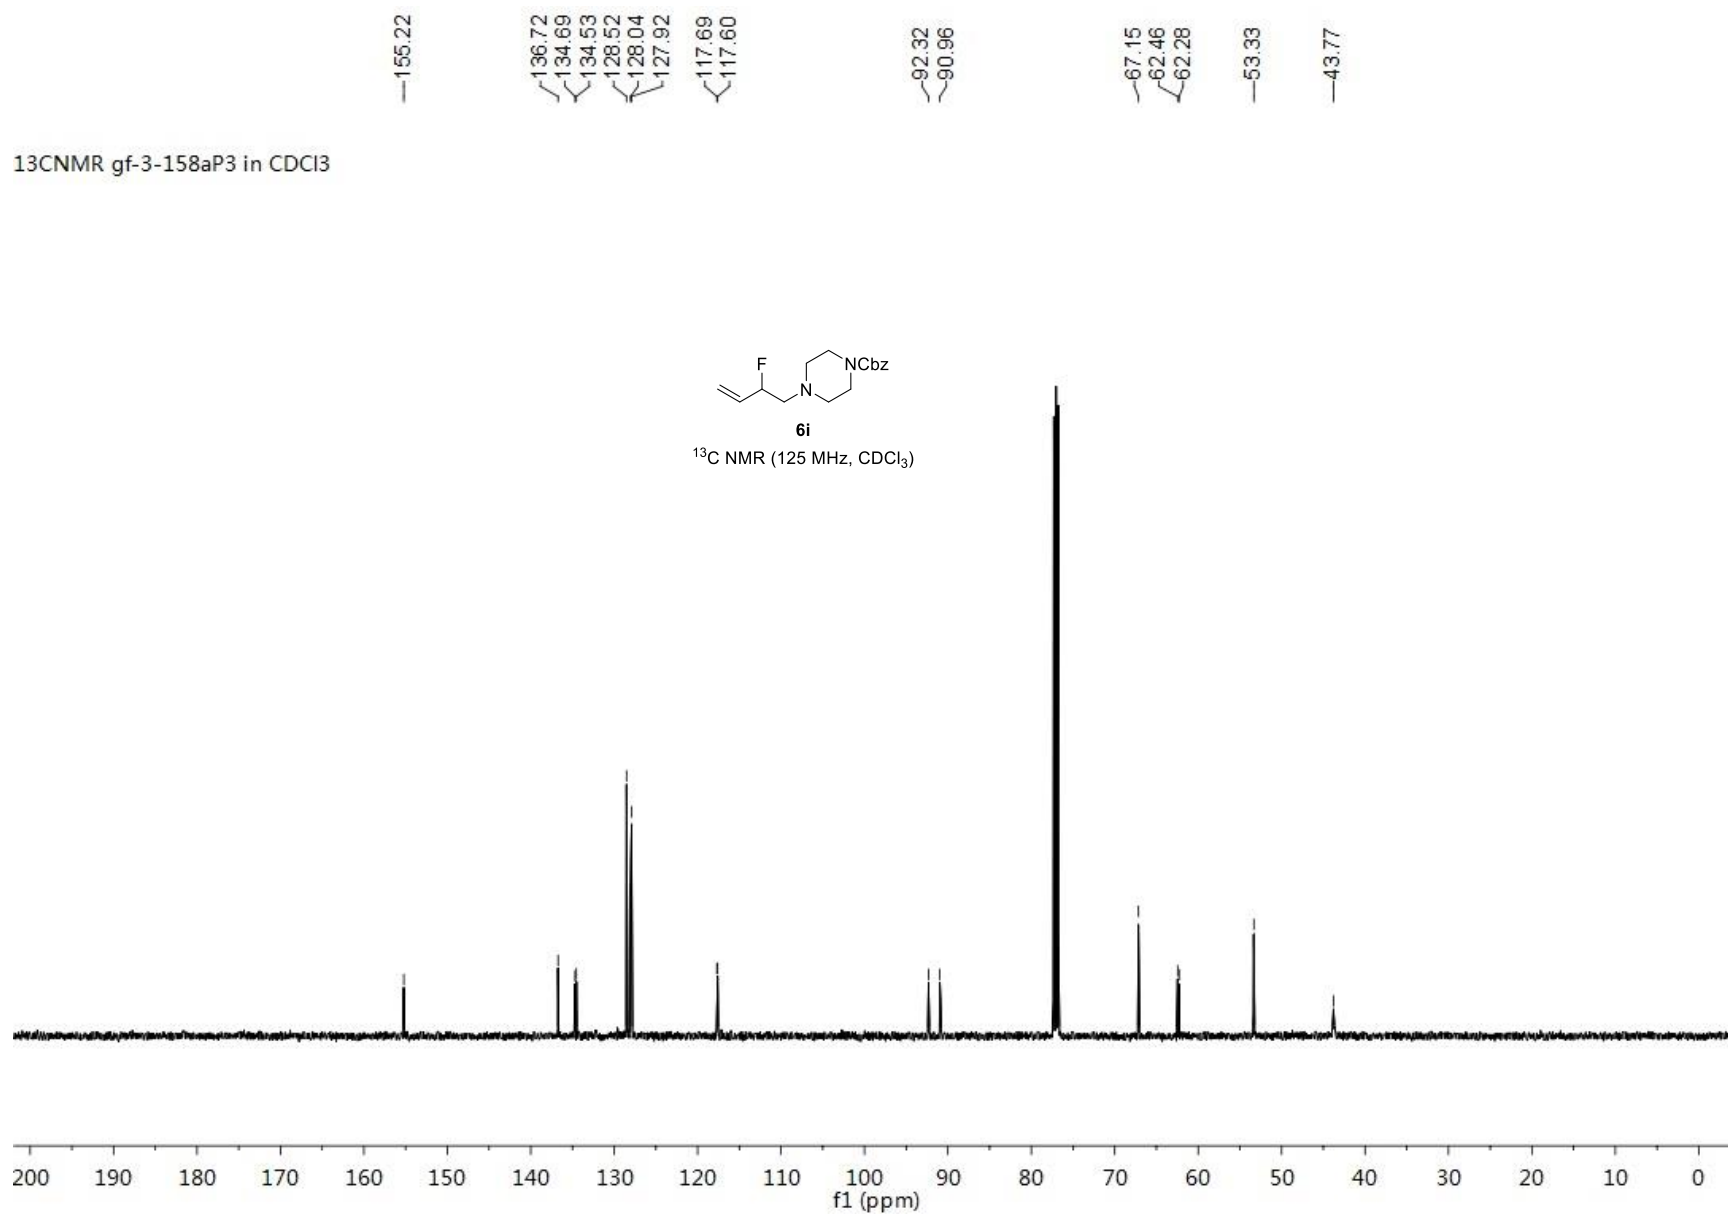

<sup>19</sup>F NMR gf-3-158aP3 in CDCl<sub>3</sub>

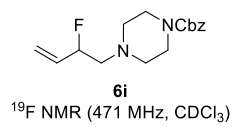

---178.9649

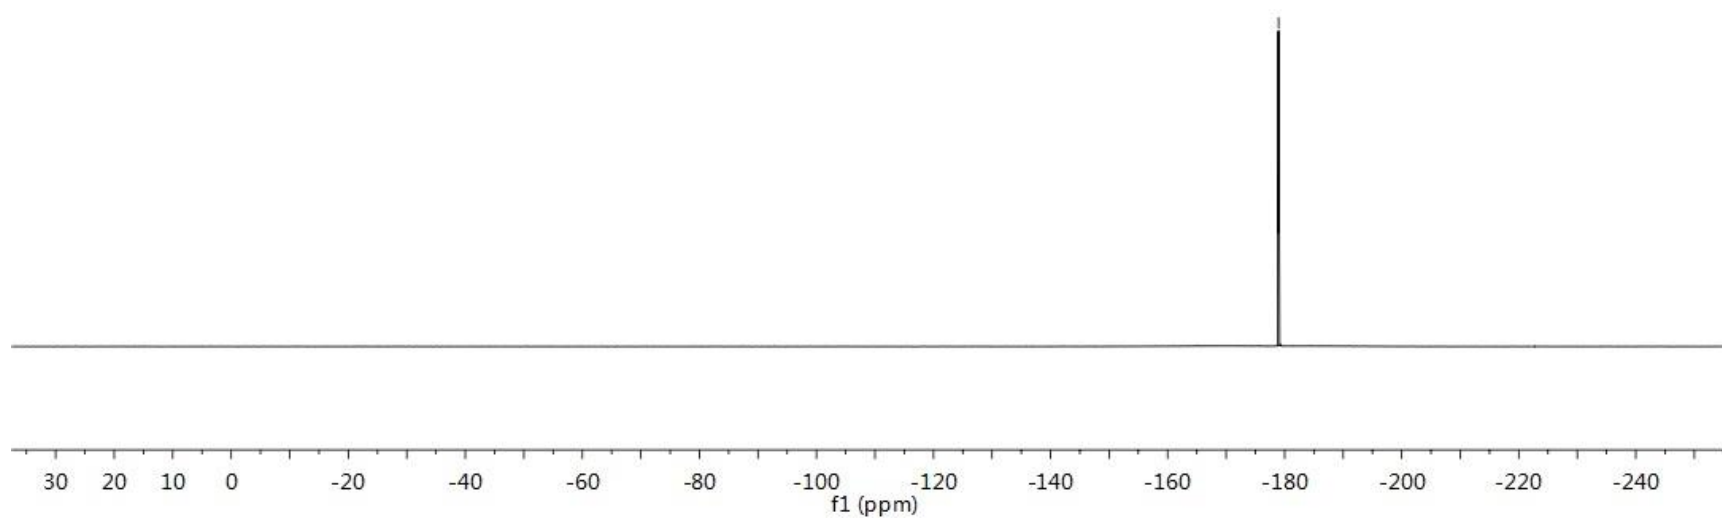

S233

7.3744  
7.3609  
7.3569  
7.3500  
7.3401  
7.3363  
7.3266  
7.3214  
7.3187  
7.3117  
7.3094  
7.3058  
7.3004  
7.2923  
7.2600  
5.9855  
5.9634  
5.9503  
5.9282  
5.9152  
5.8931  
5.3212  
5.2864  
5.1627  
5.1406  
5.1274

3.5003  
3.4802  
3.4804

2.5822  
2.5539  
2.5407  
2.5276  
2.5118  
2.4990  
2.4799  
2.4514

1.4567  
1.4135

<sup>1</sup>H NMR of **6j** in CDCl<sub>3</sub>

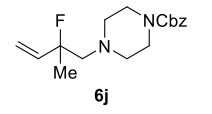

<sup>1</sup>H NMR (500 MHz, CDCl<sub>3</sub>)

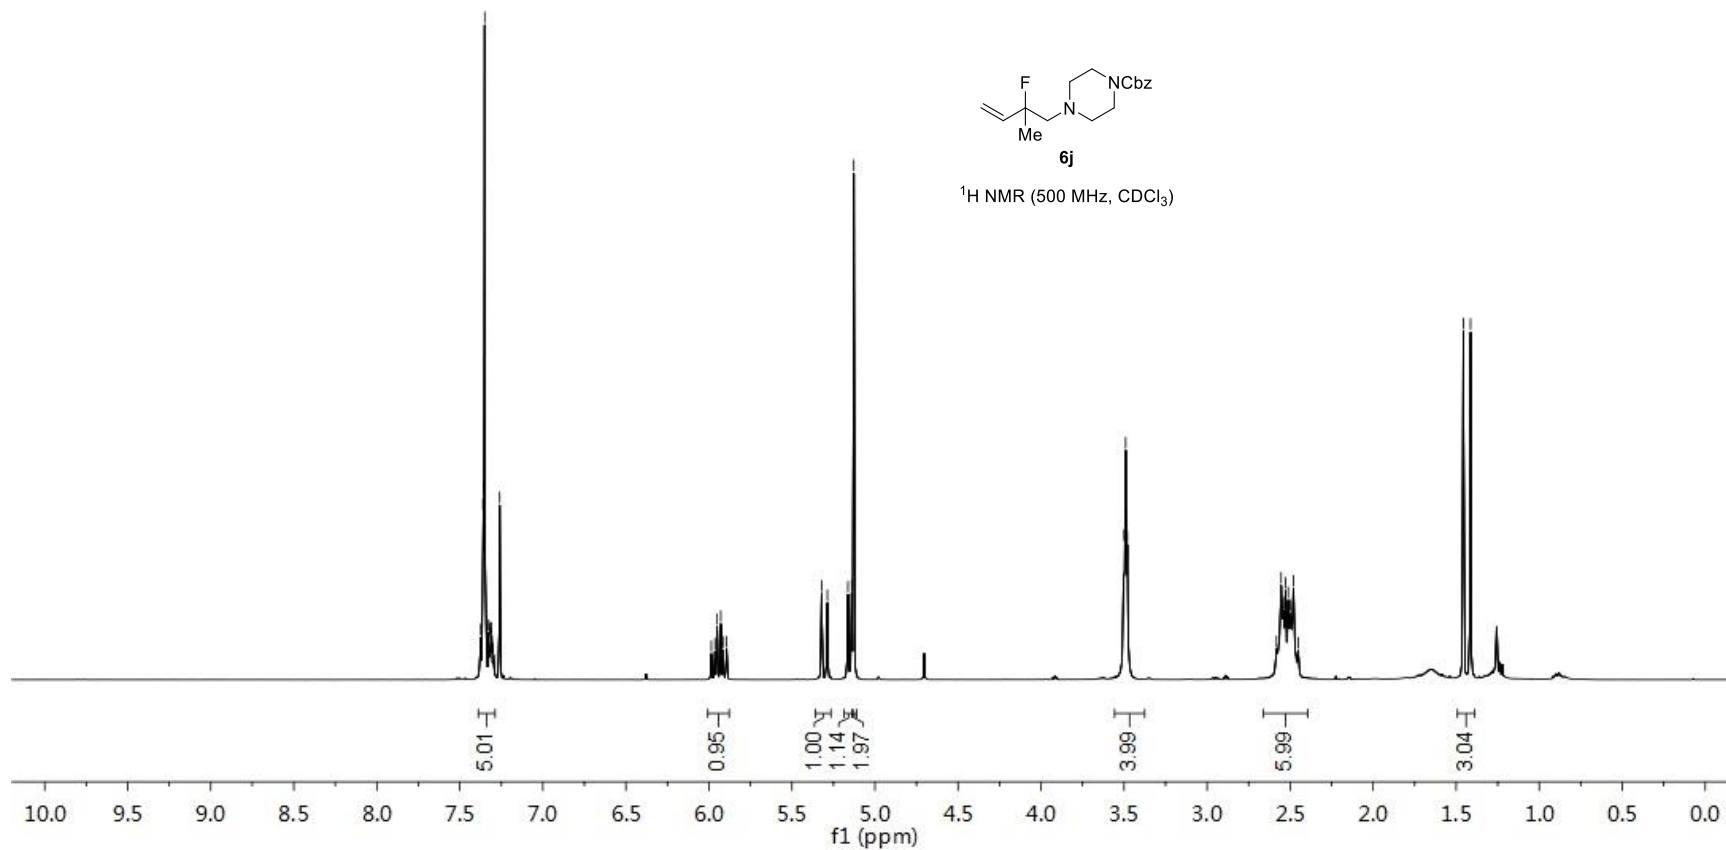

<sup>13</sup>C NMR gf-3-151bP in CDCl<sub>3</sub>

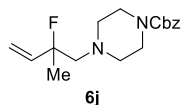

<sup>13</sup>C NMR (125 MHz, CDCl<sub>3</sub>)

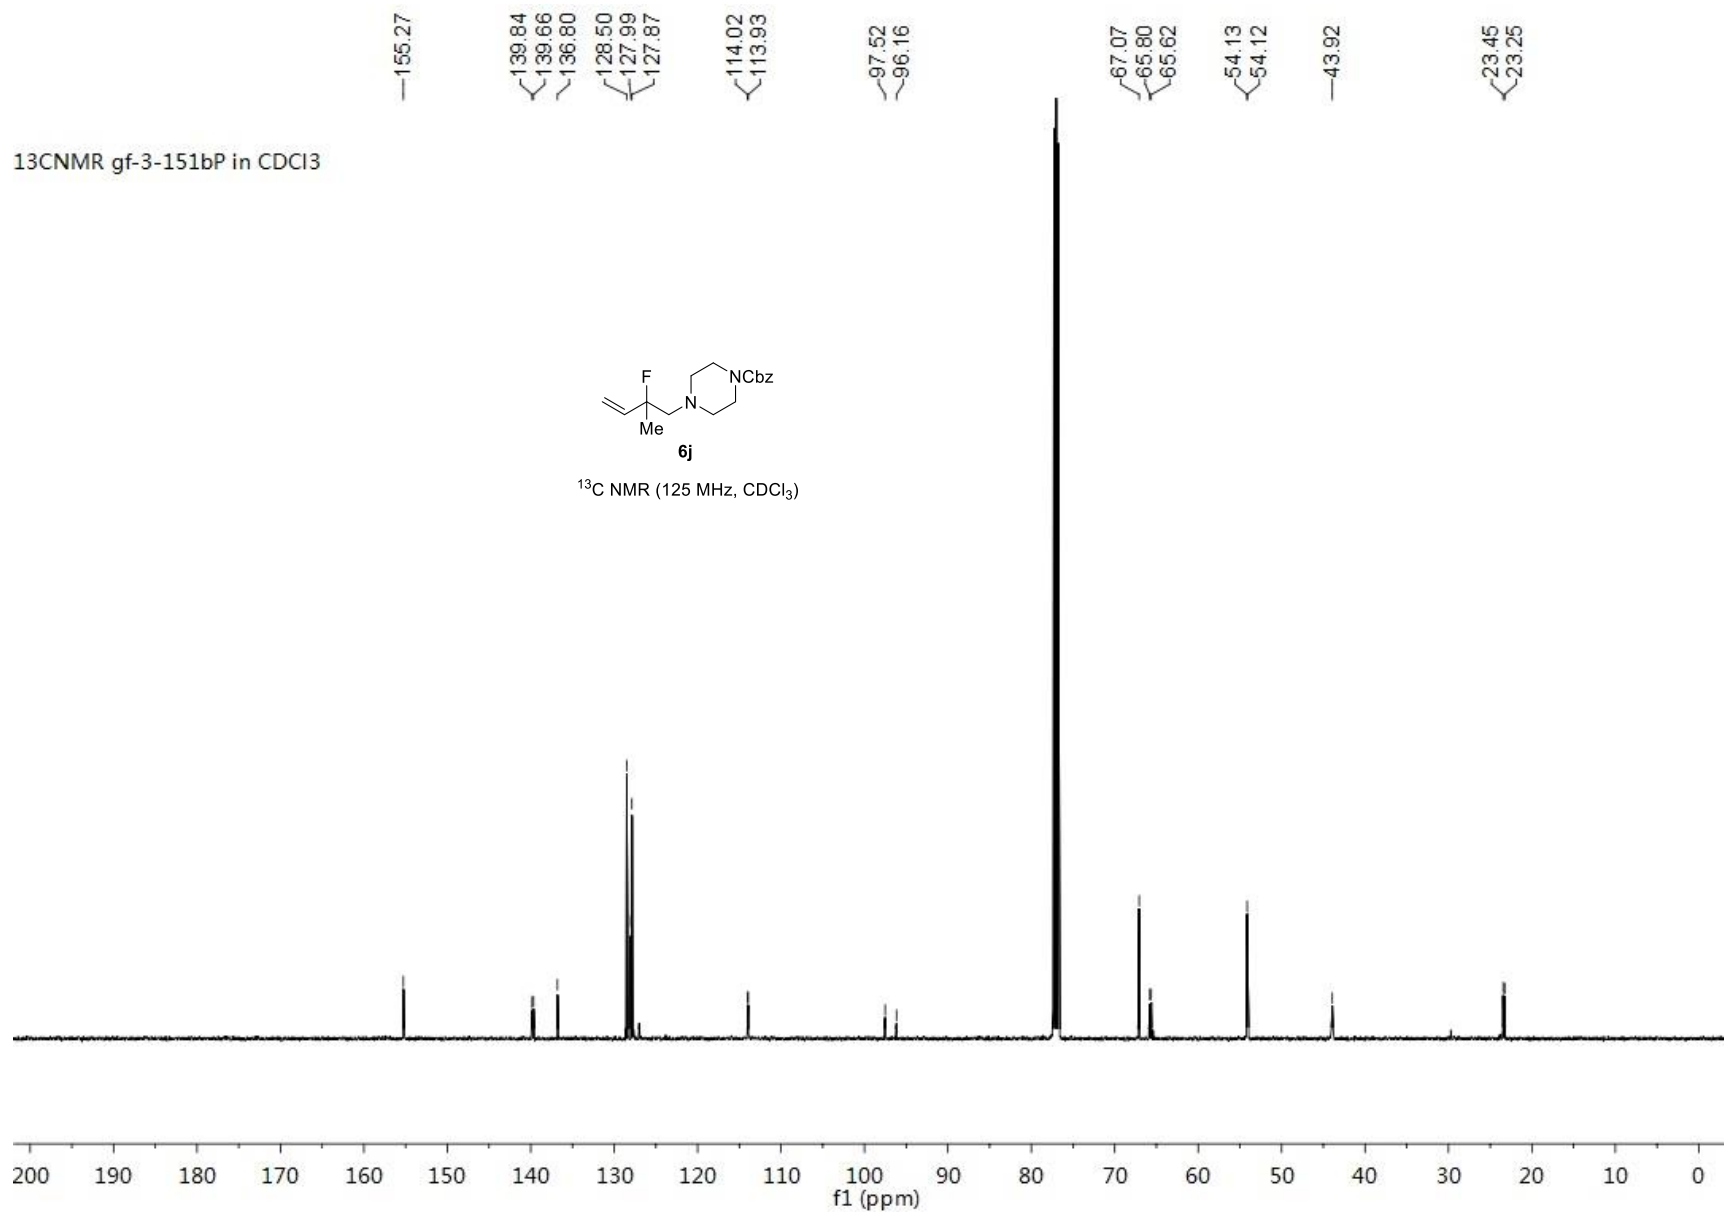

<sup>19</sup>F NMR gf-3-151bP1 in CDCl<sub>3</sub>

— 147.9854

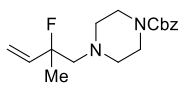

**6j**

<sup>19</sup>F NMR (471 MHz, CDCl<sub>3</sub>)

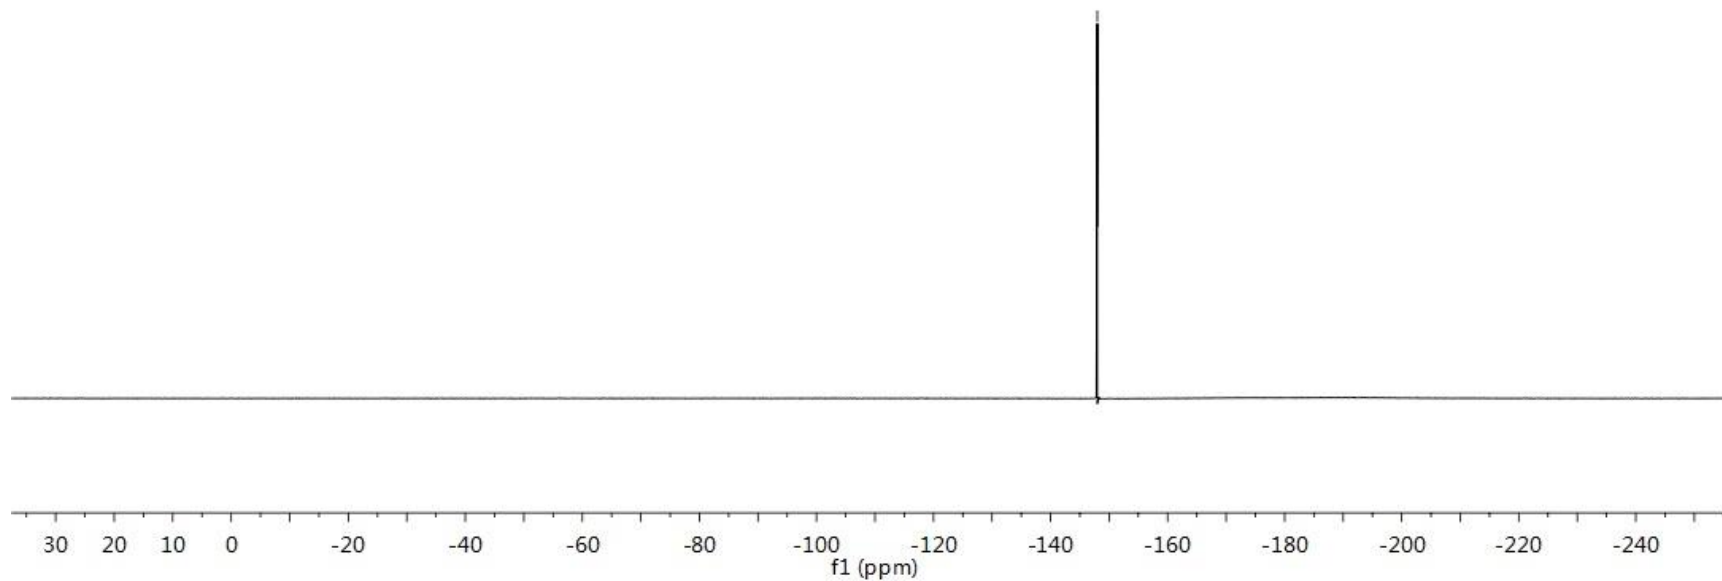

7.3761  
7.3728  
7.3609  
7.3598  
7.3547  
7.3493  
7.3388  
7.3281  
7.3237  
7.3147  
7.3110  
7.2997  
7.2942  
7.2602

5.1277  
5.0087  
4.8939

3.5124

2.7141  
2.6914  
2.6630  
2.6361  
2.6151  
2.5849  
2.4924

1.7729  
1.4775  
1.4331

<sup>1</sup>H NMR of 6k in CDCl<sub>3</sub>

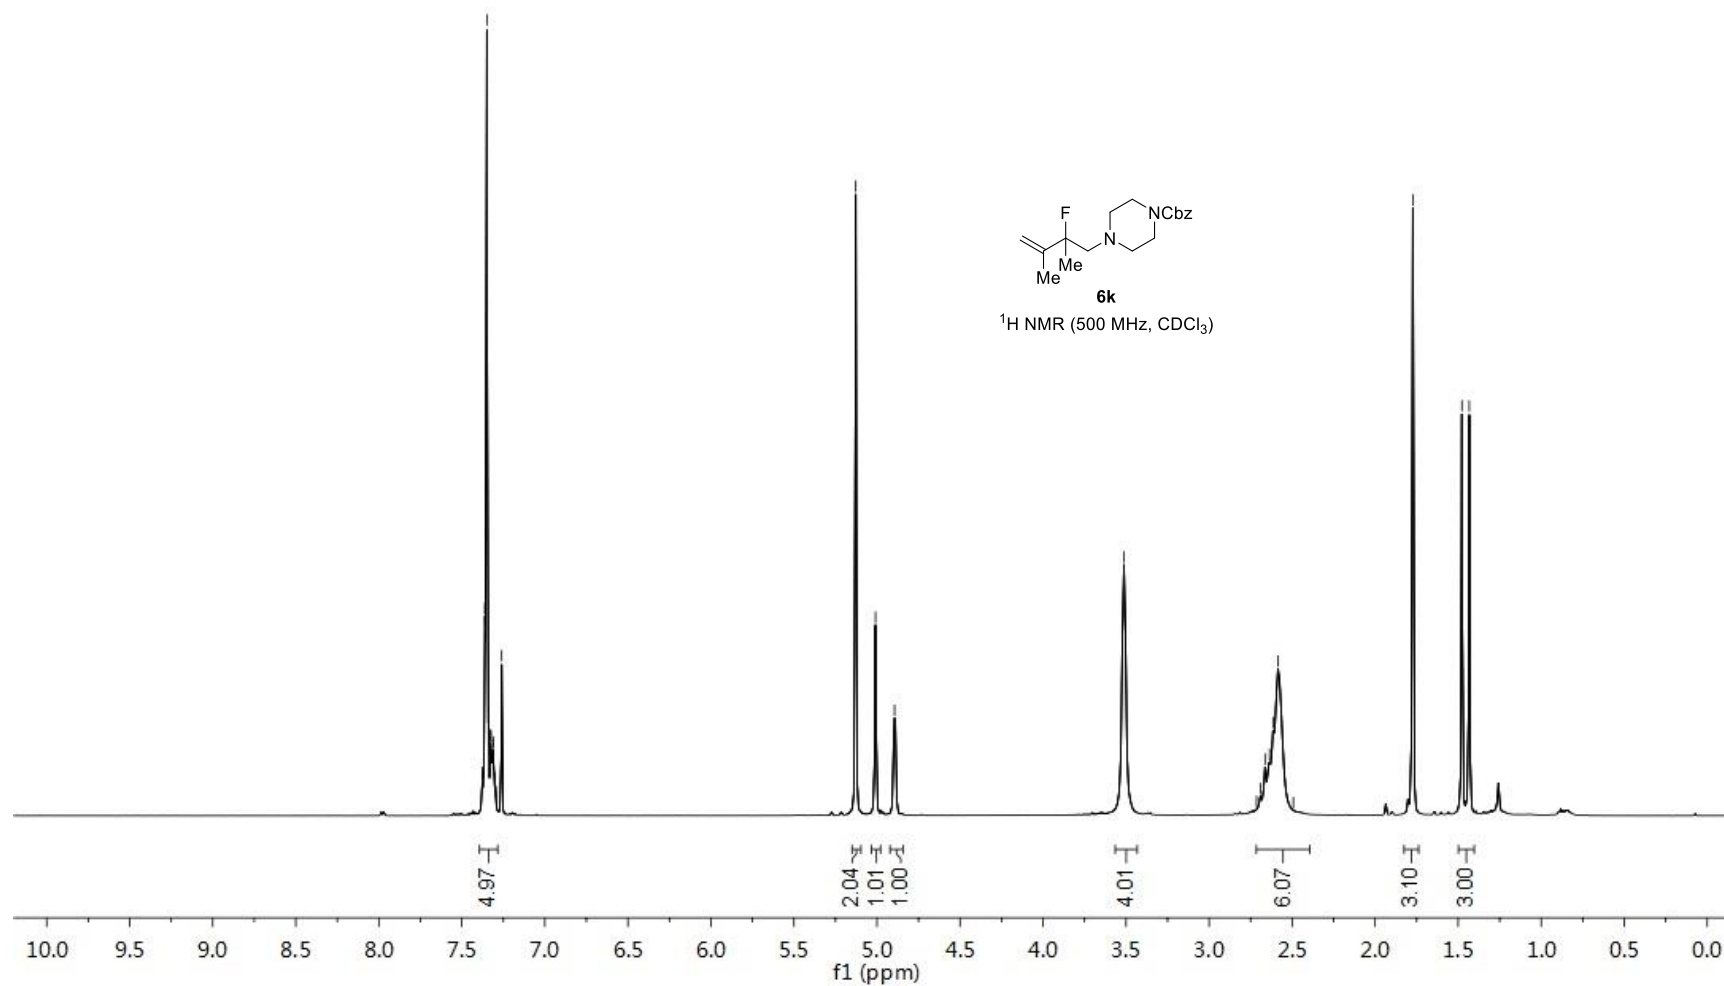

—155.23  
—146.37  
—146.21  
—136.77  
—128.50  
—128.01  
—127.88  
—110.72  
—110.63  
—99.72  
—98.33  
—67.10  
—64.46  
—64.28  
—54.01  
—53.99  
—43.76  
—23.33  
—23.13  
—19.29  
—19.25

<sup>13</sup>CNMR gf-3-153bP1re in CDCl<sub>3</sub>

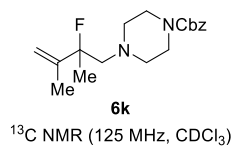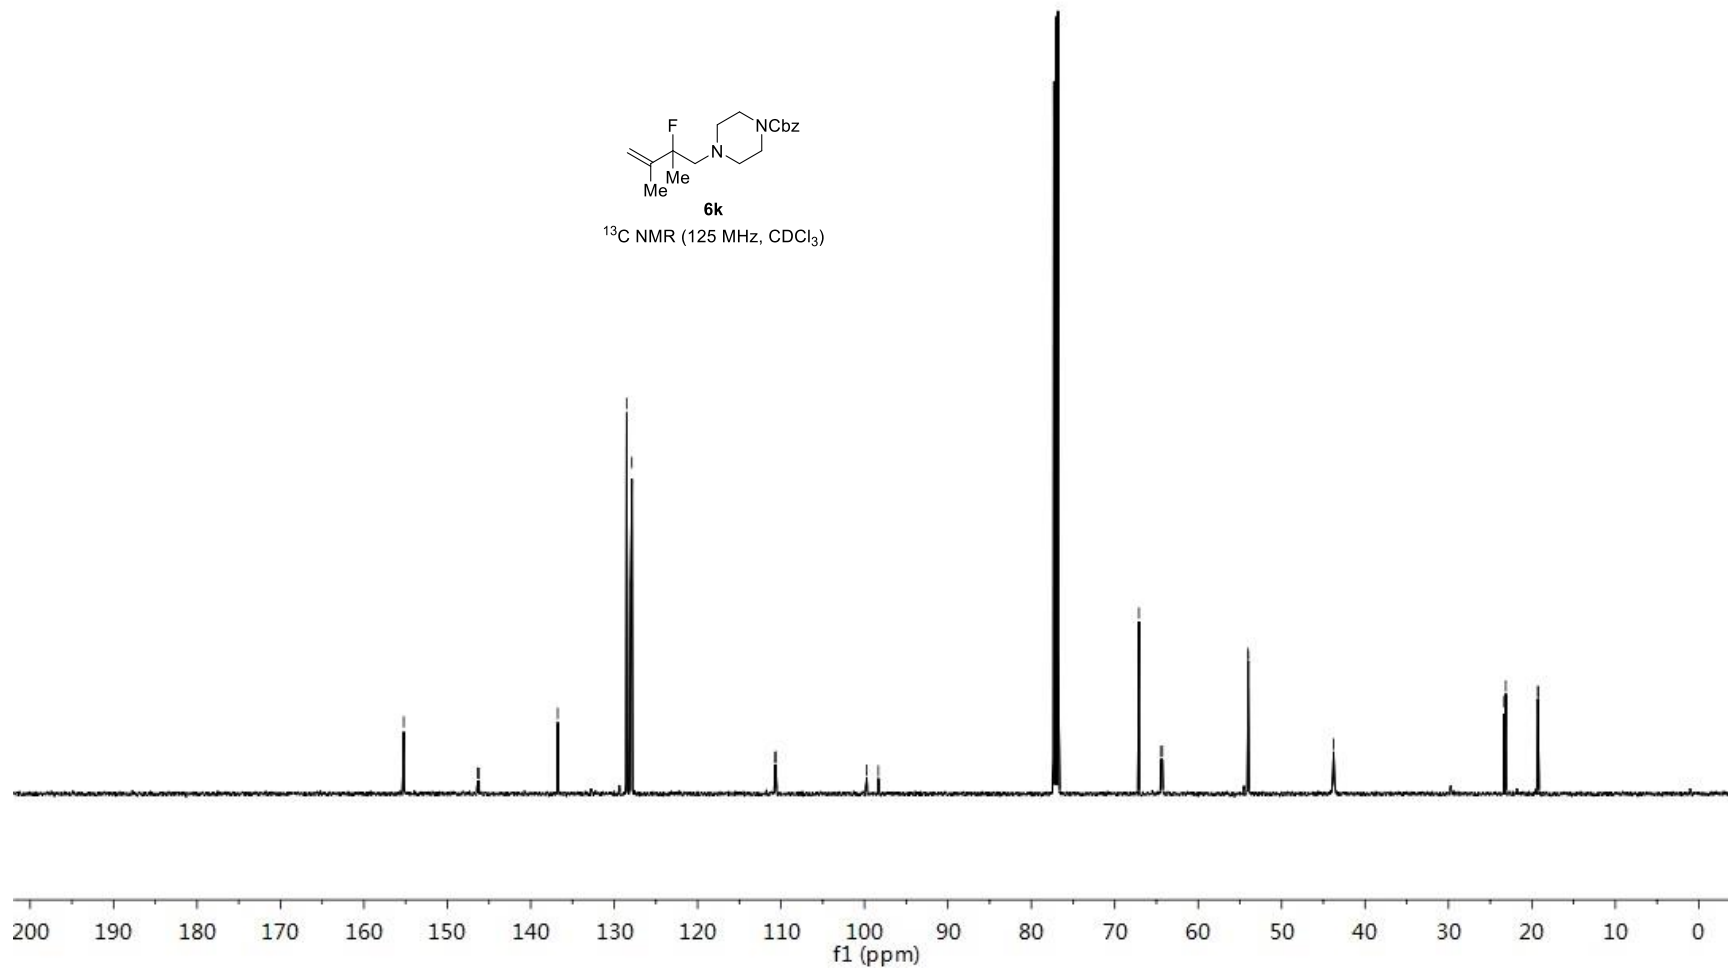

<sup>19</sup>F NMR gf-3-153bP1 in CDCl<sub>3</sub>

146.4459

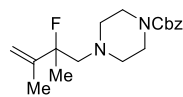

<sup>19</sup>F NMR (471 MHz, CDCl<sub>3</sub>)

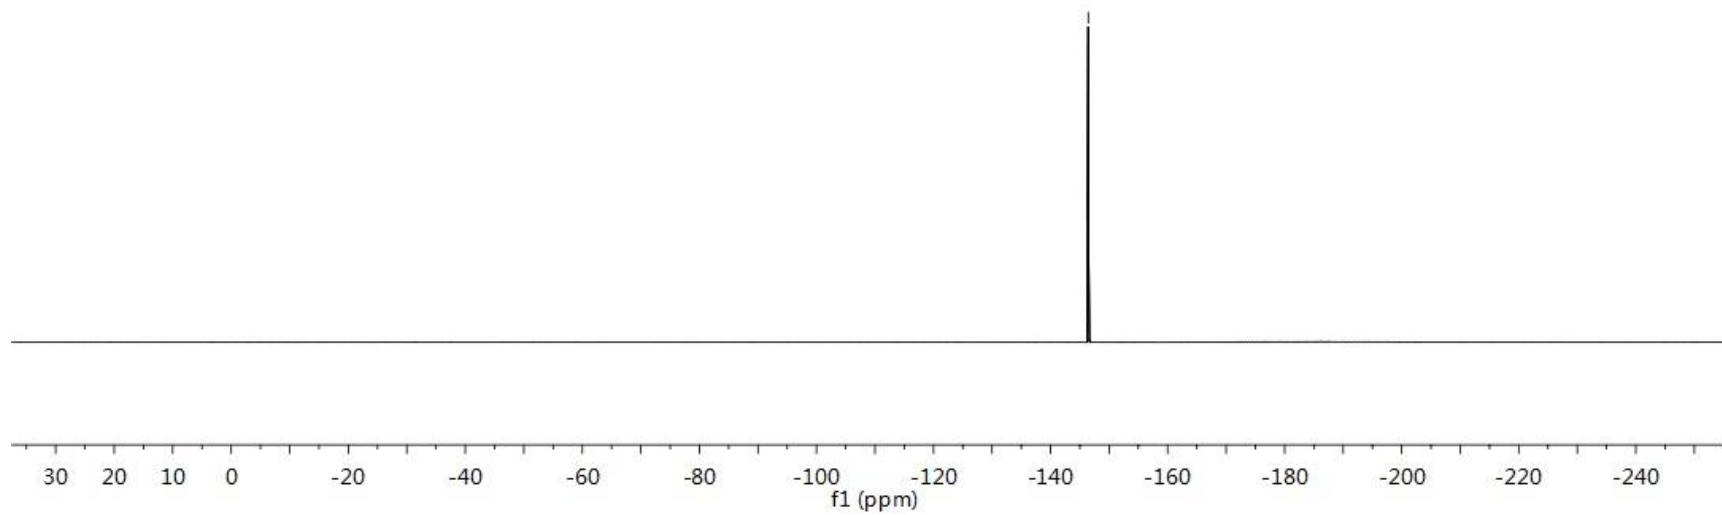



7.2597  
 6.5703  
 6.5491  
 6.5366  
 6.5155  
 6.2856  
 6.2818  
 6.2519  
 6.2481  
 5.6848  
 5.6810  
 5.6637  
 5.6599  
 4.9992  
 4.8867  
 4.8837  
 4.8821  
 4.8792  
 3.6618  
 3.5198  
 2.6449  
 2.6163  
 2.5973  
 2.5652  
 2.5538  
 2.5171  
 2.4885  
 1.7743  
 1.4693  
 1.4249

<sup>1</sup>H NMR of gf-3-229aP in CDCl<sub>3</sub>

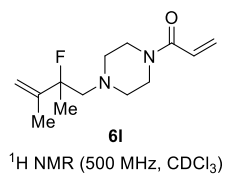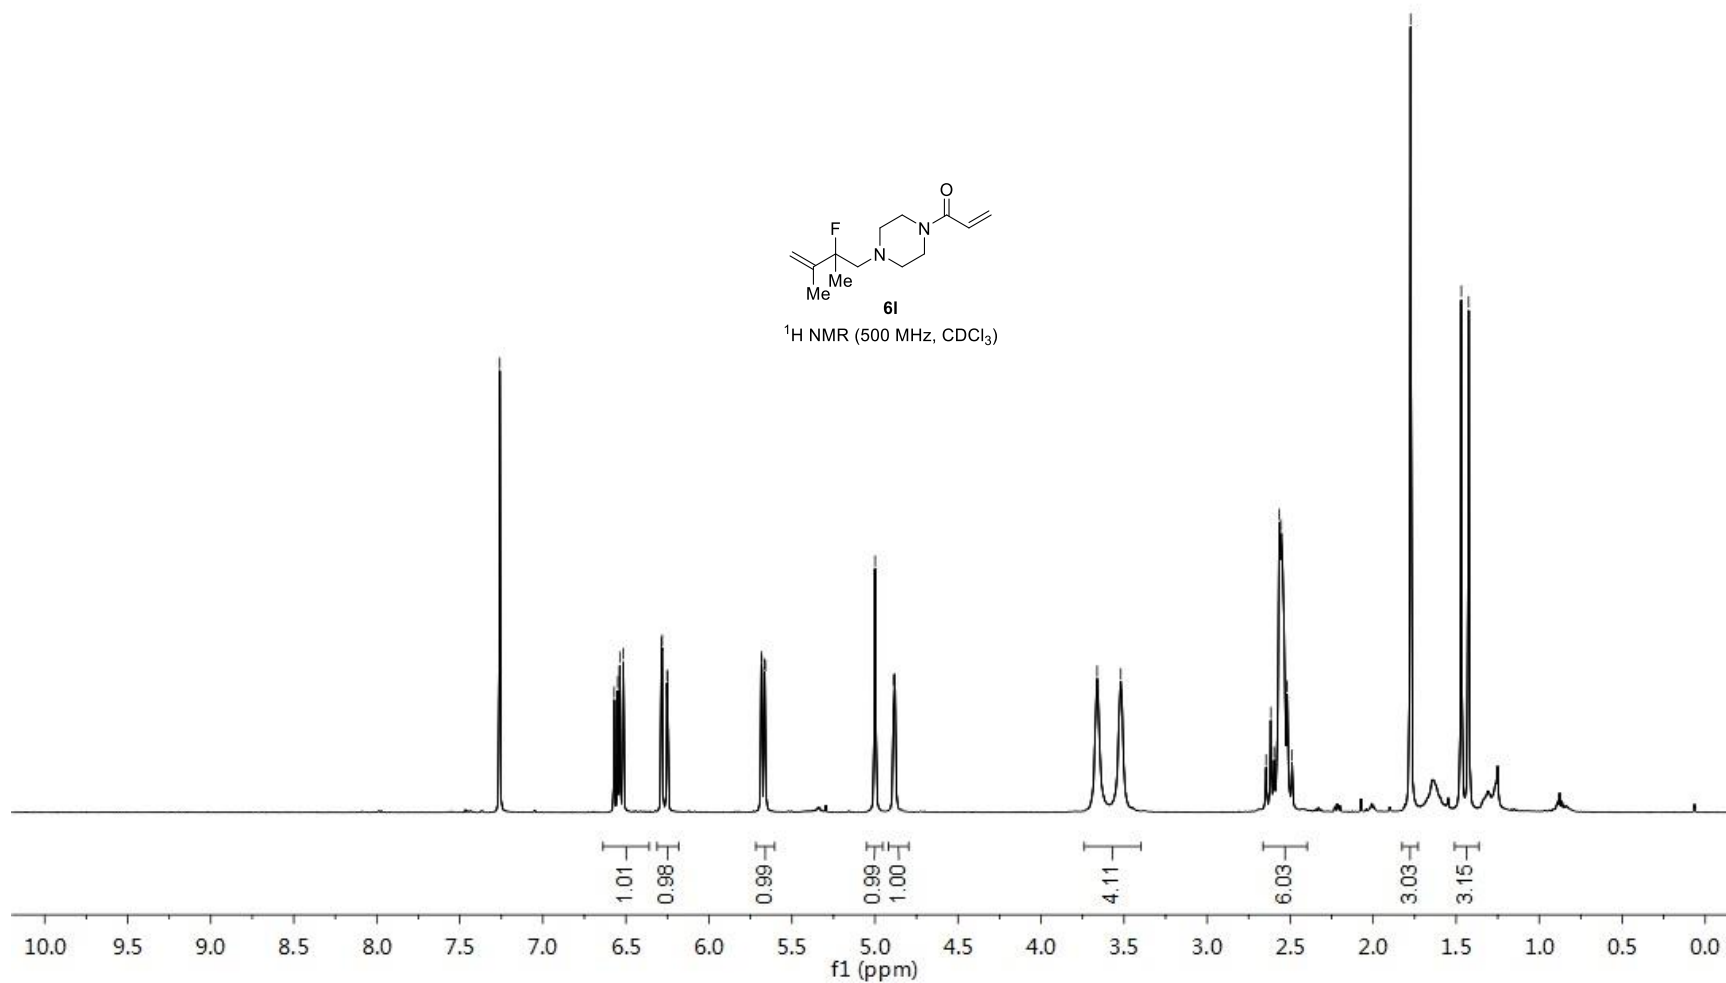

—165.31

146.47  
146.31

127.67  
127.54

110.56  
110.47

99.88  
98.49

64.43  
64.26

54.41  
54.09

45.89  
42.10

23.35  
23.15  
19.32  
19.28

<sup>13</sup>CNMR gf-3-229PP in CDCl<sub>3</sub>

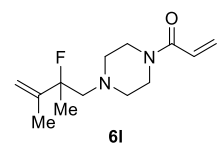

<sup>13</sup>C NMR (125 MHz, CDCl<sub>3</sub>)

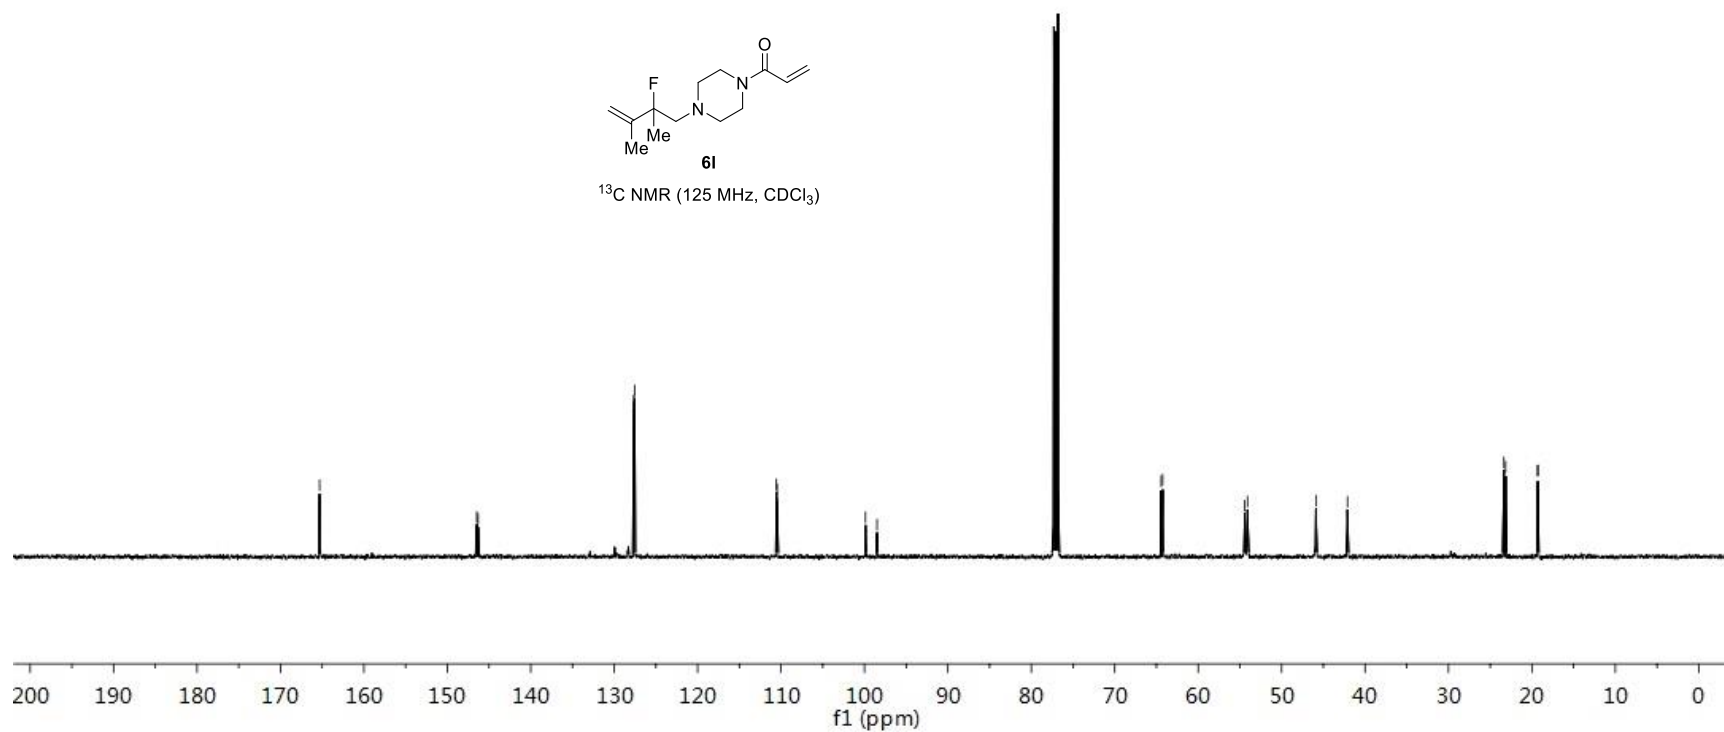

<sup>19</sup>F NMR gf-3-229aP in CDCl<sub>3</sub>

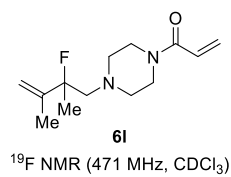

-146.5713

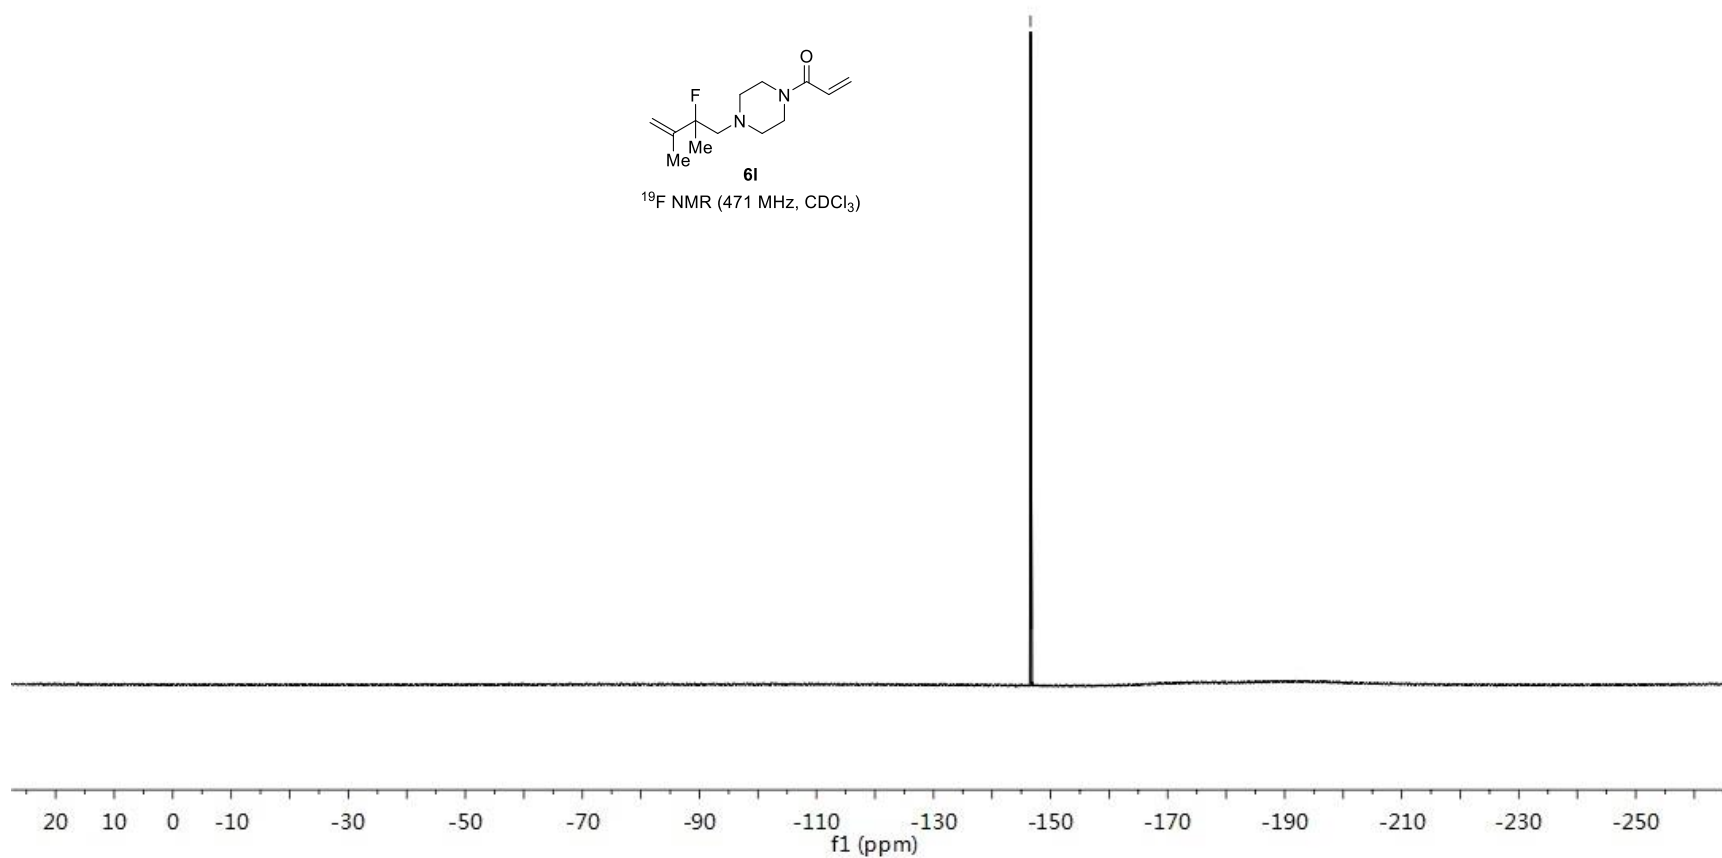

<sup>1</sup>H NMR of 6m in CDCl<sub>3</sub>

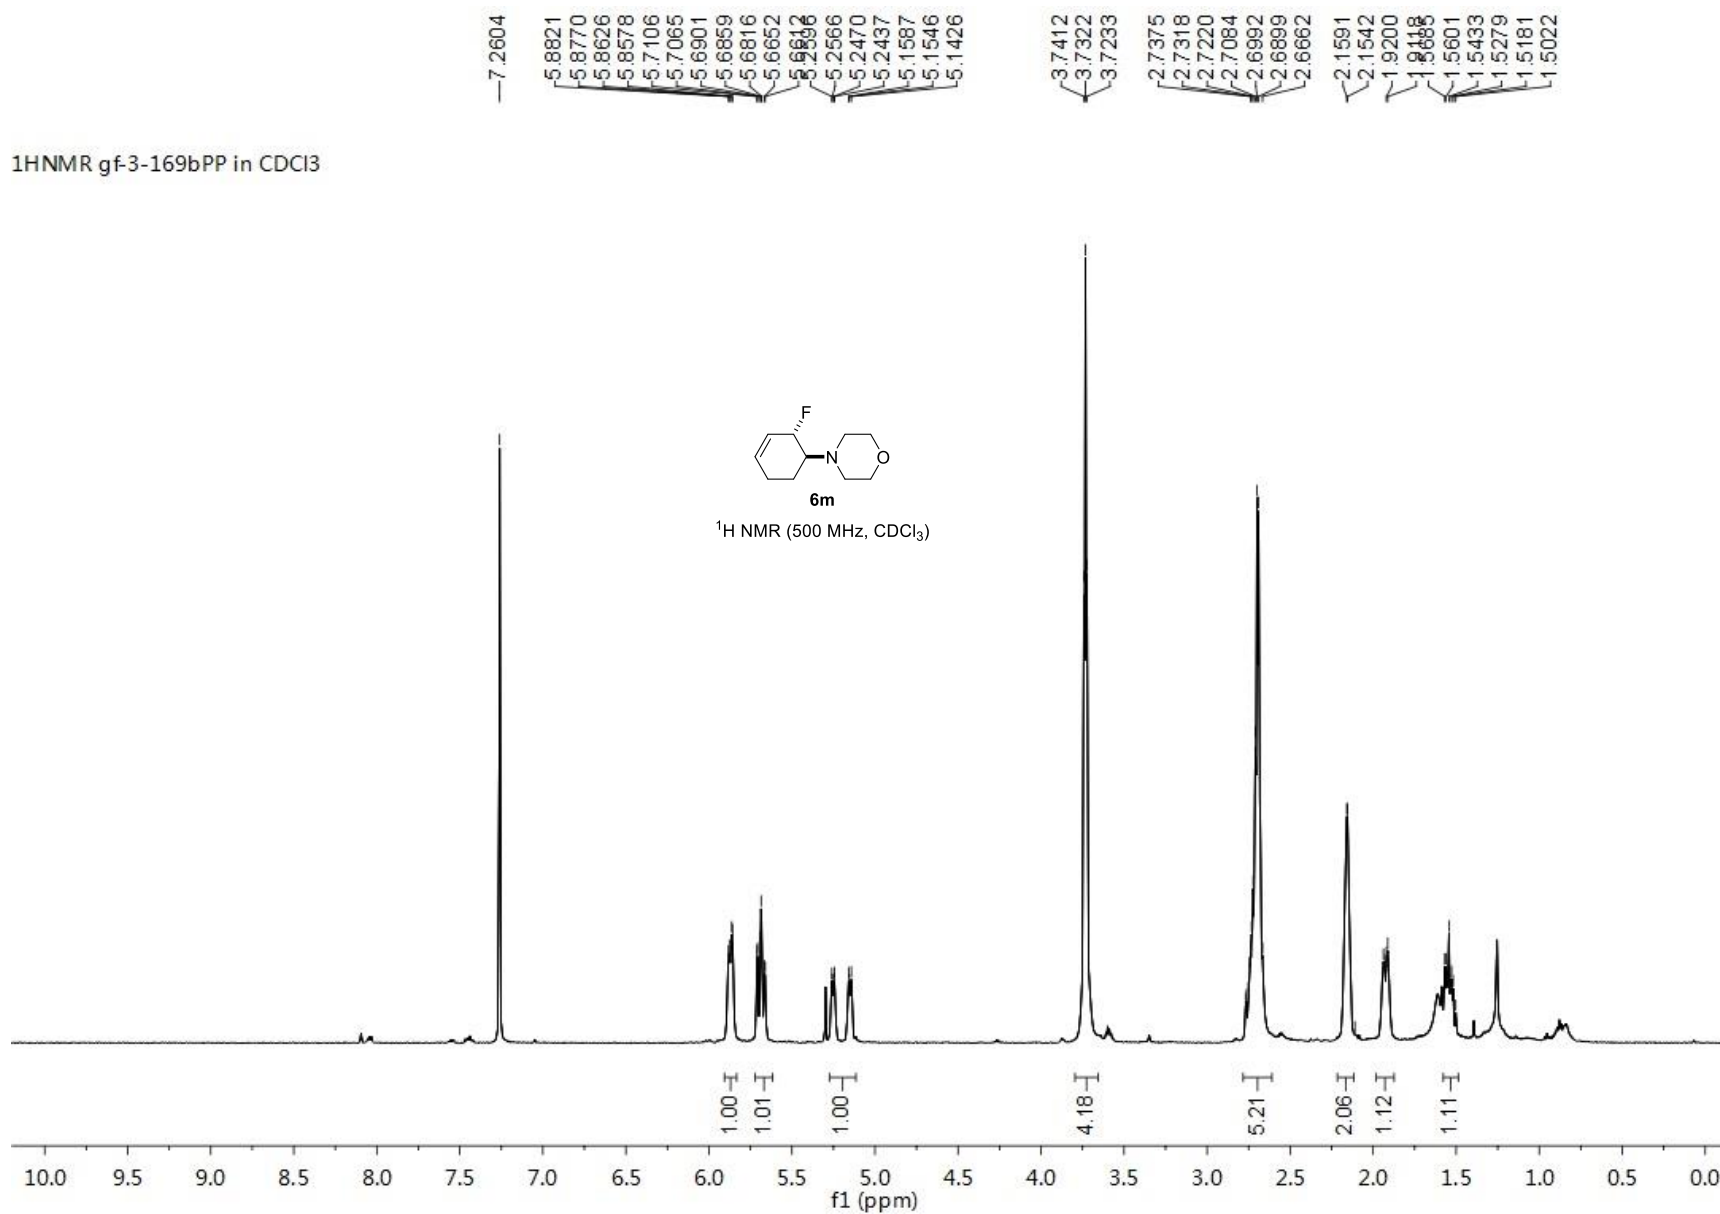

<sup>13</sup>C NMR gf-3-169bPP in CDCl<sub>3</sub>

131.49  
131.41  
126.33  
126.16

89.34  
88.02

67.51  
64.43  
64.30

49.97

25.37  
25.35  
23.10  
23.04

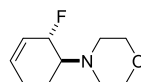

**6m**

<sup>13</sup>C NMR (125 MHz, CDCl<sub>3</sub>)

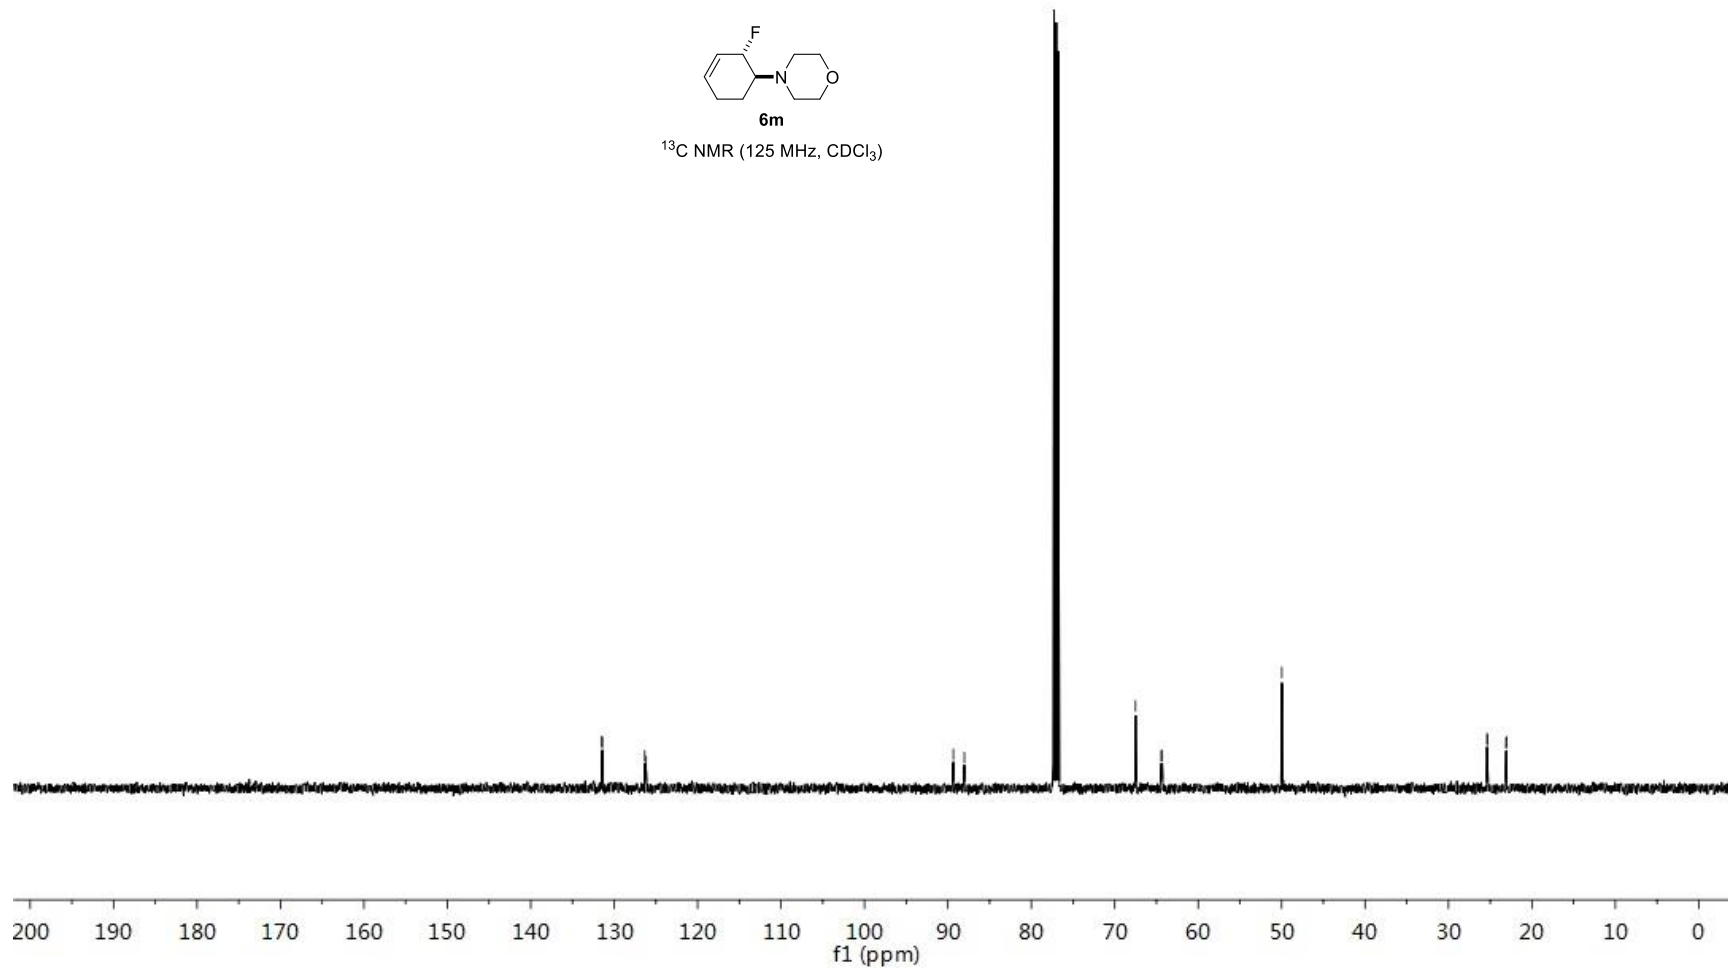

19FNMR gf-3-169bPP in CDCl3

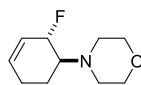

6m

<sup>19</sup>F NMR (471 MHz, CDCl<sub>3</sub>)

---172.4859

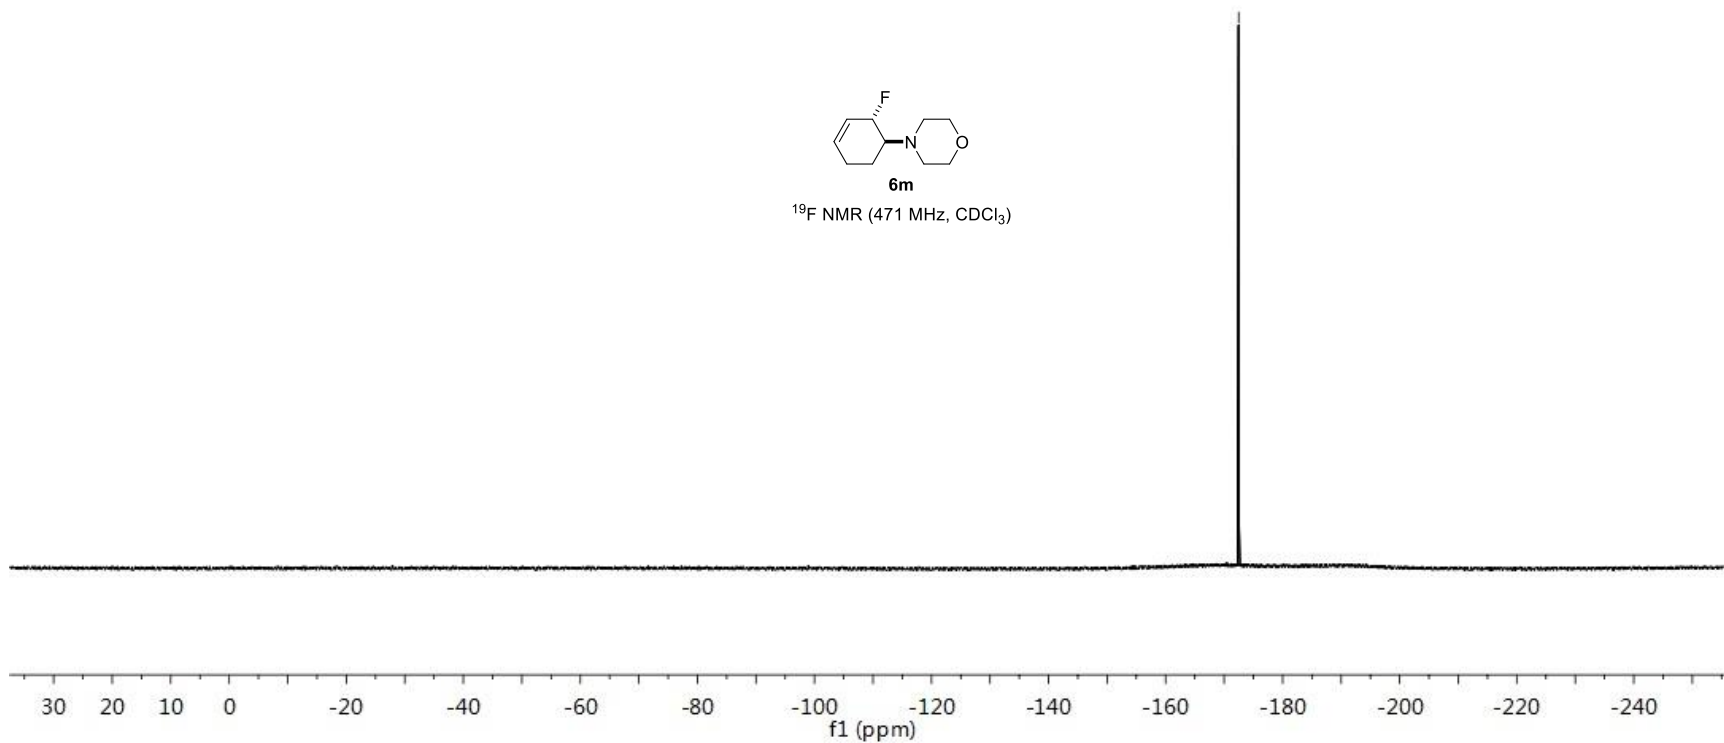

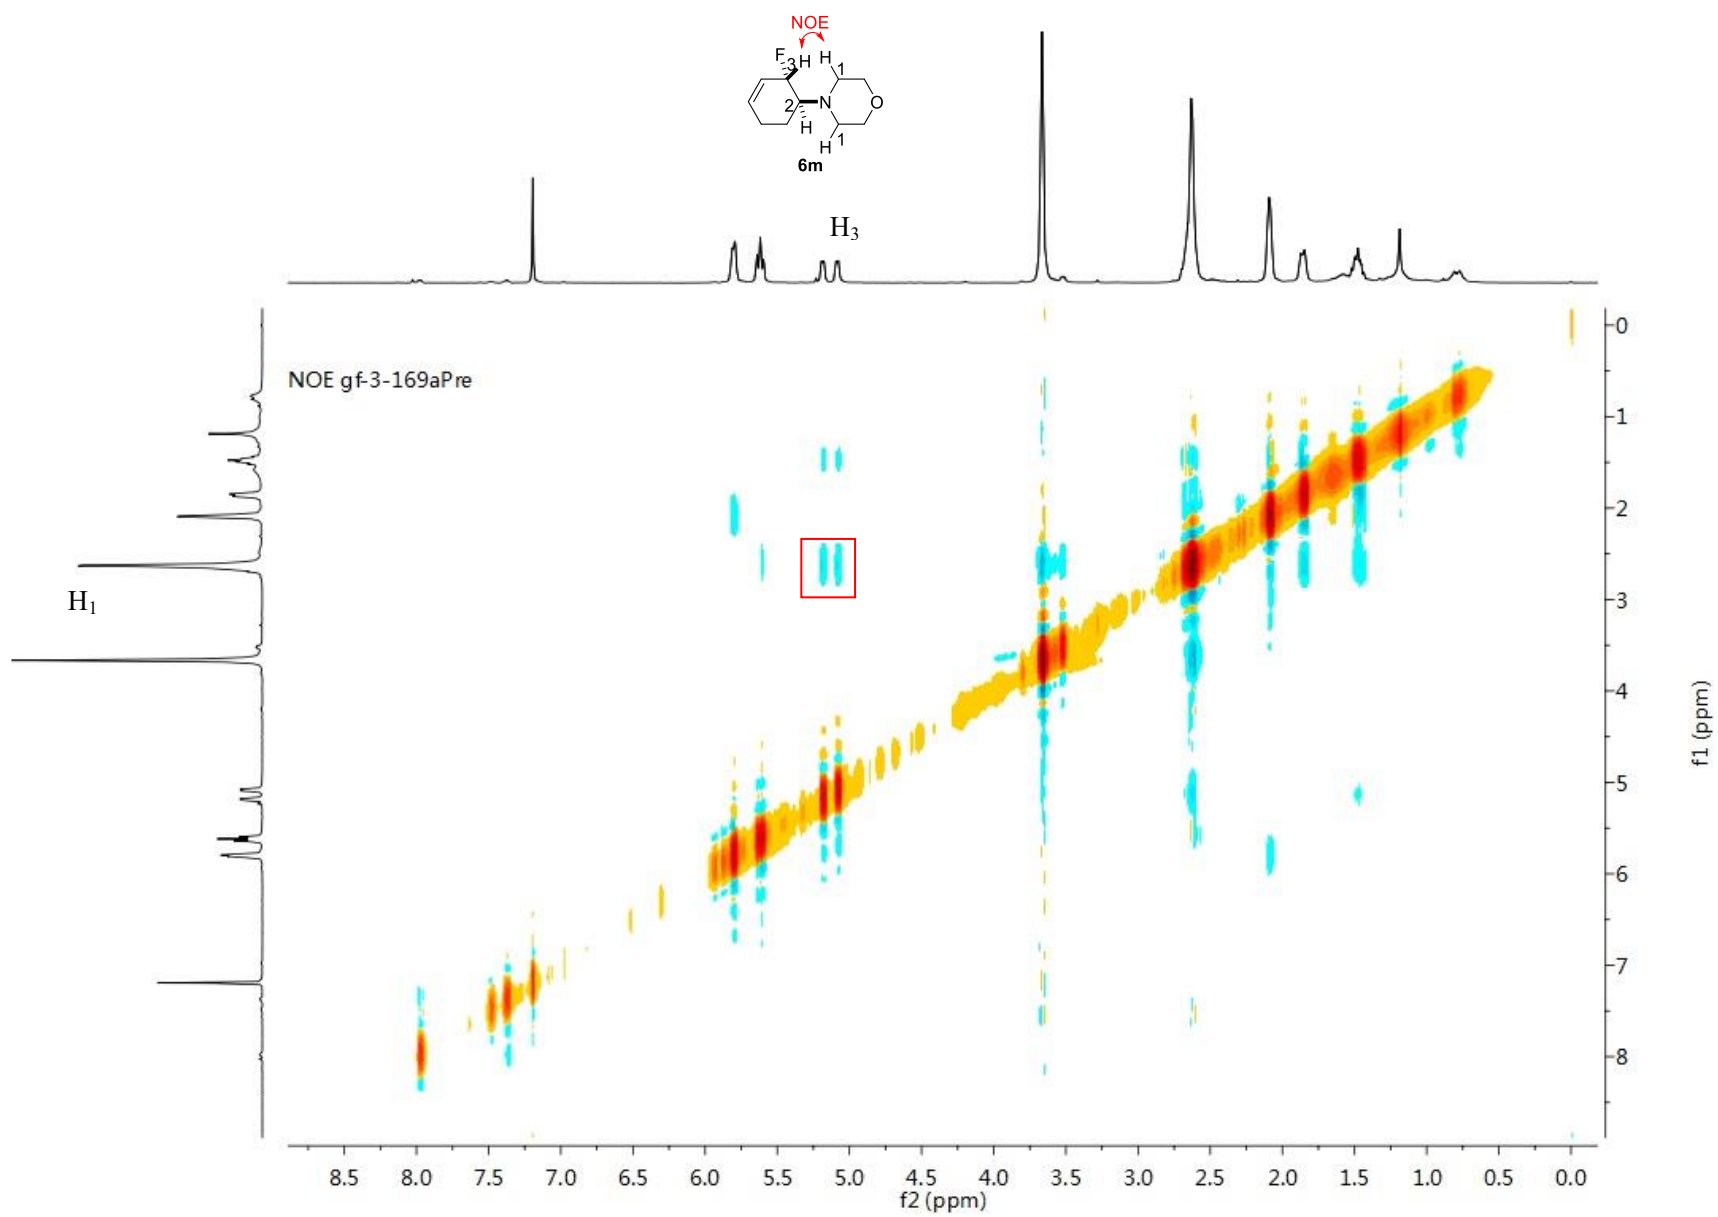

7.3789  
7.3755  
7.3607  
7.3532  
7.3385  
7.3296  
7.3239  
7.3213  
7.3125  
7.3089  
7.3029  
7.2953  
7.2603  
5.1312  
4.6613  
4.6563  
4.6515  
4.6465  
4.6415  
4.6365  
4.6318  
4.6268  
4.5614  
4.5569  
4.5516  
4.5464  
4.5419  
4.5366  
4.5314  
4.5269  
3.5381  
3.5283  
3.5190  
2.6592  
2.6440  
2.6313  
2.6209  
2.6160  
2.6058  
2.5930  
2.5778  
2.5213  
2.5161  
2.4936  
2.4886  
2.4585  
2.4534  
2.4305  
2.4254  
1.7105  
1.7025  
1.6961  
1.6895  
1.6821  
1.6673  
1.6524  
1.6447  
1.6406  
1.6300  
1.6151  
1.6123  
1.6021  
1.5972  
1.5873  
1.5833  
1.5731  
1.5687  
0.9976  
0.9827  
0.9677

<sup>1</sup>H NMR of gf-3-201aP in CDCl<sub>3</sub>

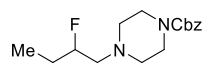

7

<sup>1</sup>H NMR (500 MHz, CDCl<sub>3</sub>)

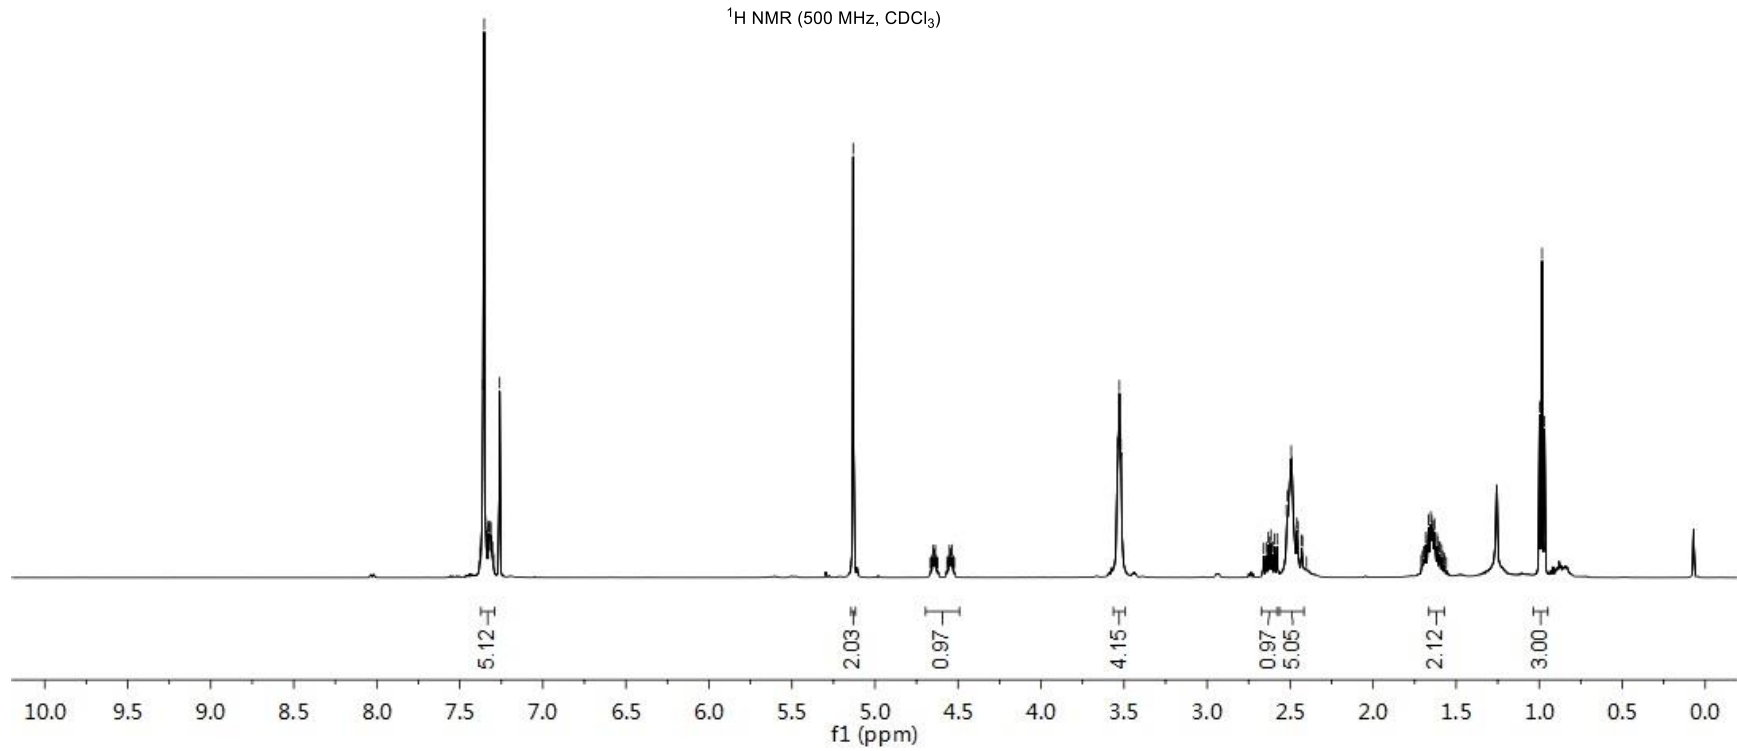



<sup>13</sup>C NMR gf-3-201aP in CDCl<sub>3</sub>

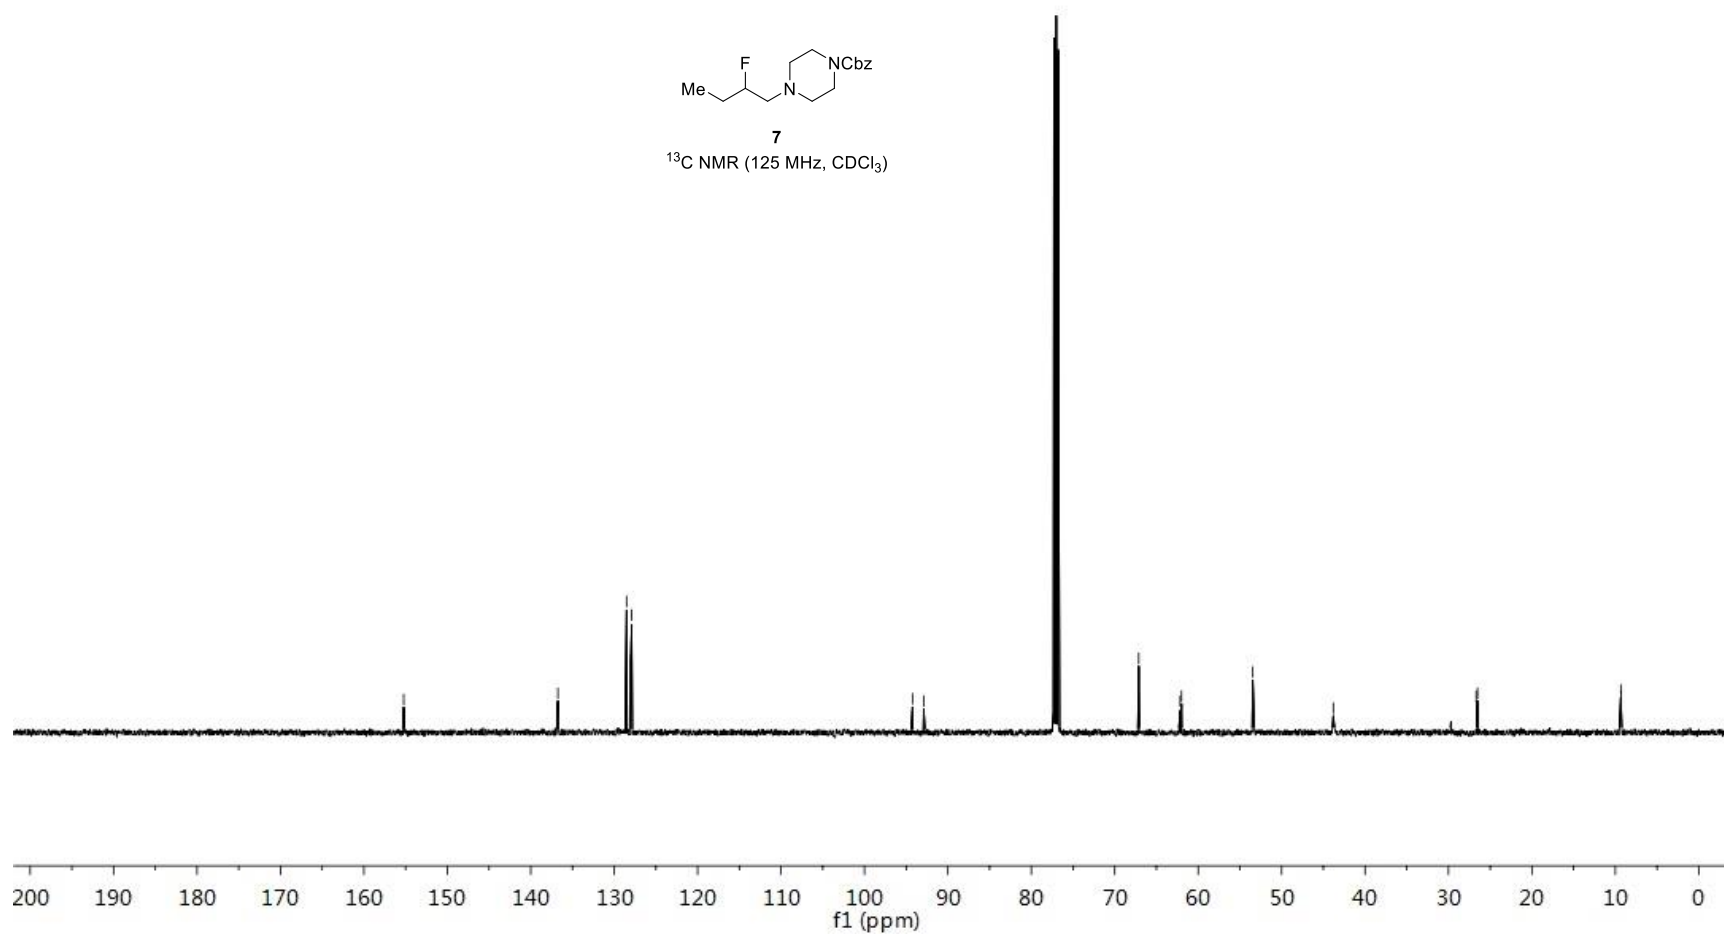

<sup>19</sup>F NMR gf-3-201aP in CDCl<sub>3</sub>

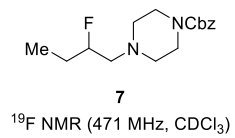

— -181.2557

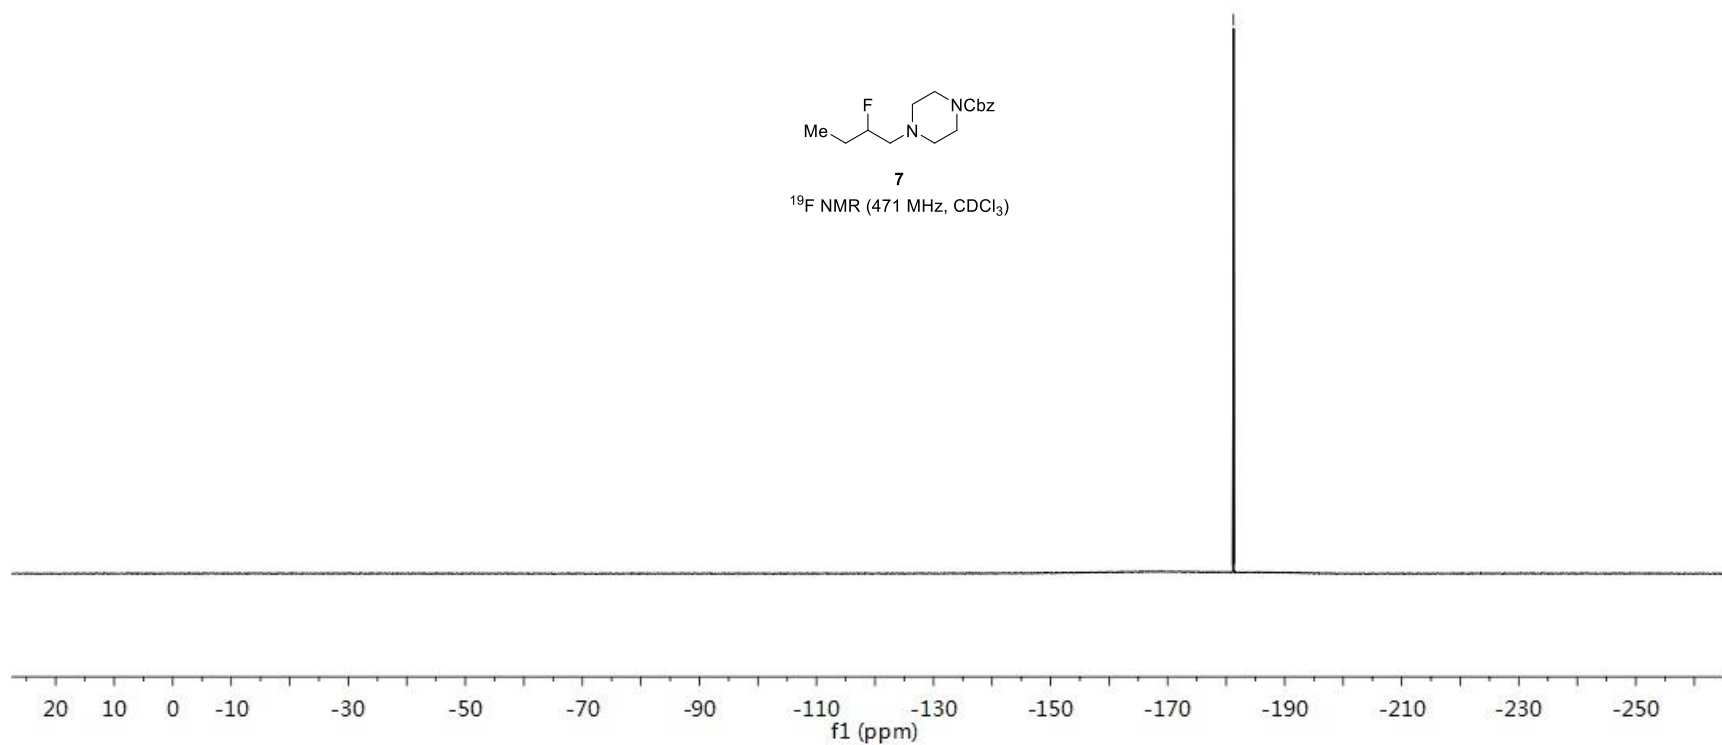

<sup>1</sup>H NMR of compound 8 in CDCl<sub>3</sub>

7.2599

4.5924  
4.5827  
4.5721  
4.5629  
4.5522  
4.5426  
4.4917  
4.4821  
4.4715  
4.4622  
4.4515  
4.4420  
3.7147  
3.7065  
3.6968  
2.7038  
2.6948  
2.6860  
2.5087  
2.4913  
2.1494  
2.1401  
2.1335  
1.8889  
1.8820  
1.8751  
1.8702  
1.7420  
1.7201  
1.7159  
1.7095  
1.4672  
1.4635  
1.2664  
1.2509  
1.2388  
1.2115  
1.1918  
1.1873  
1.1603

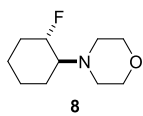

<sup>1</sup>H NMR (500 MHz, CDCl<sub>3</sub>)

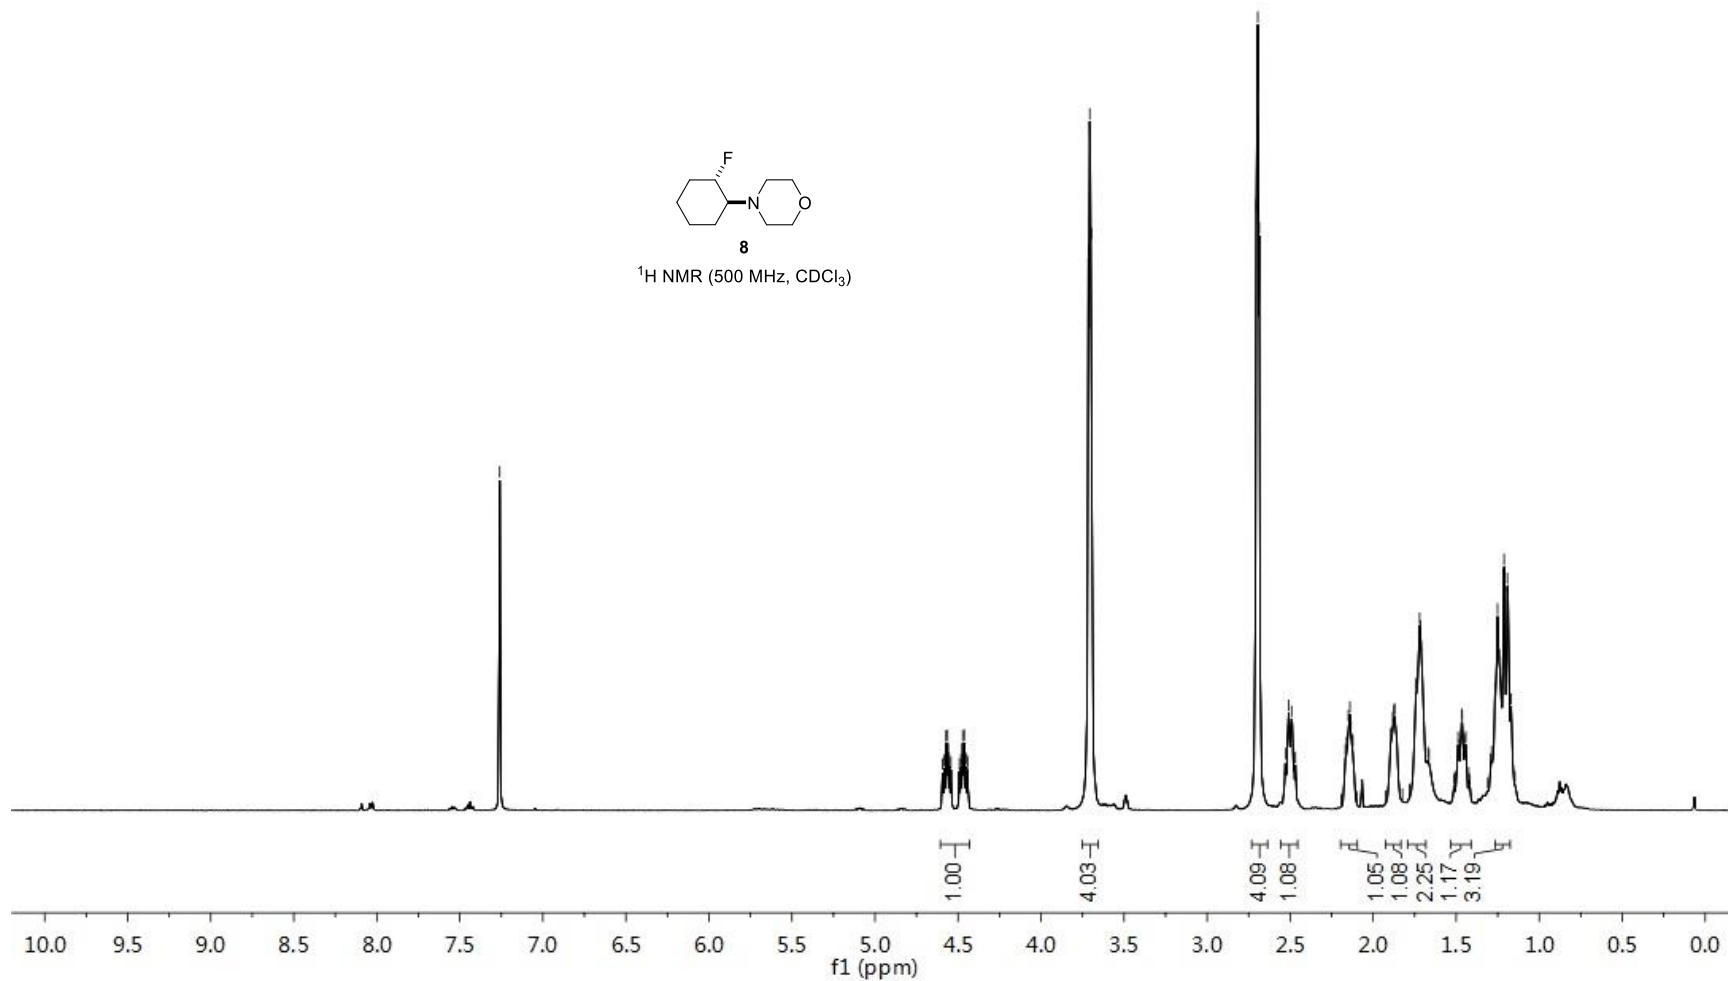

<sup>13</sup>CNMR gf-3-193cP in CDCl<sub>3</sub>

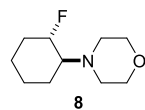

<sup>13</sup>C NMR (125 MHz, CDCl<sub>3</sub>)

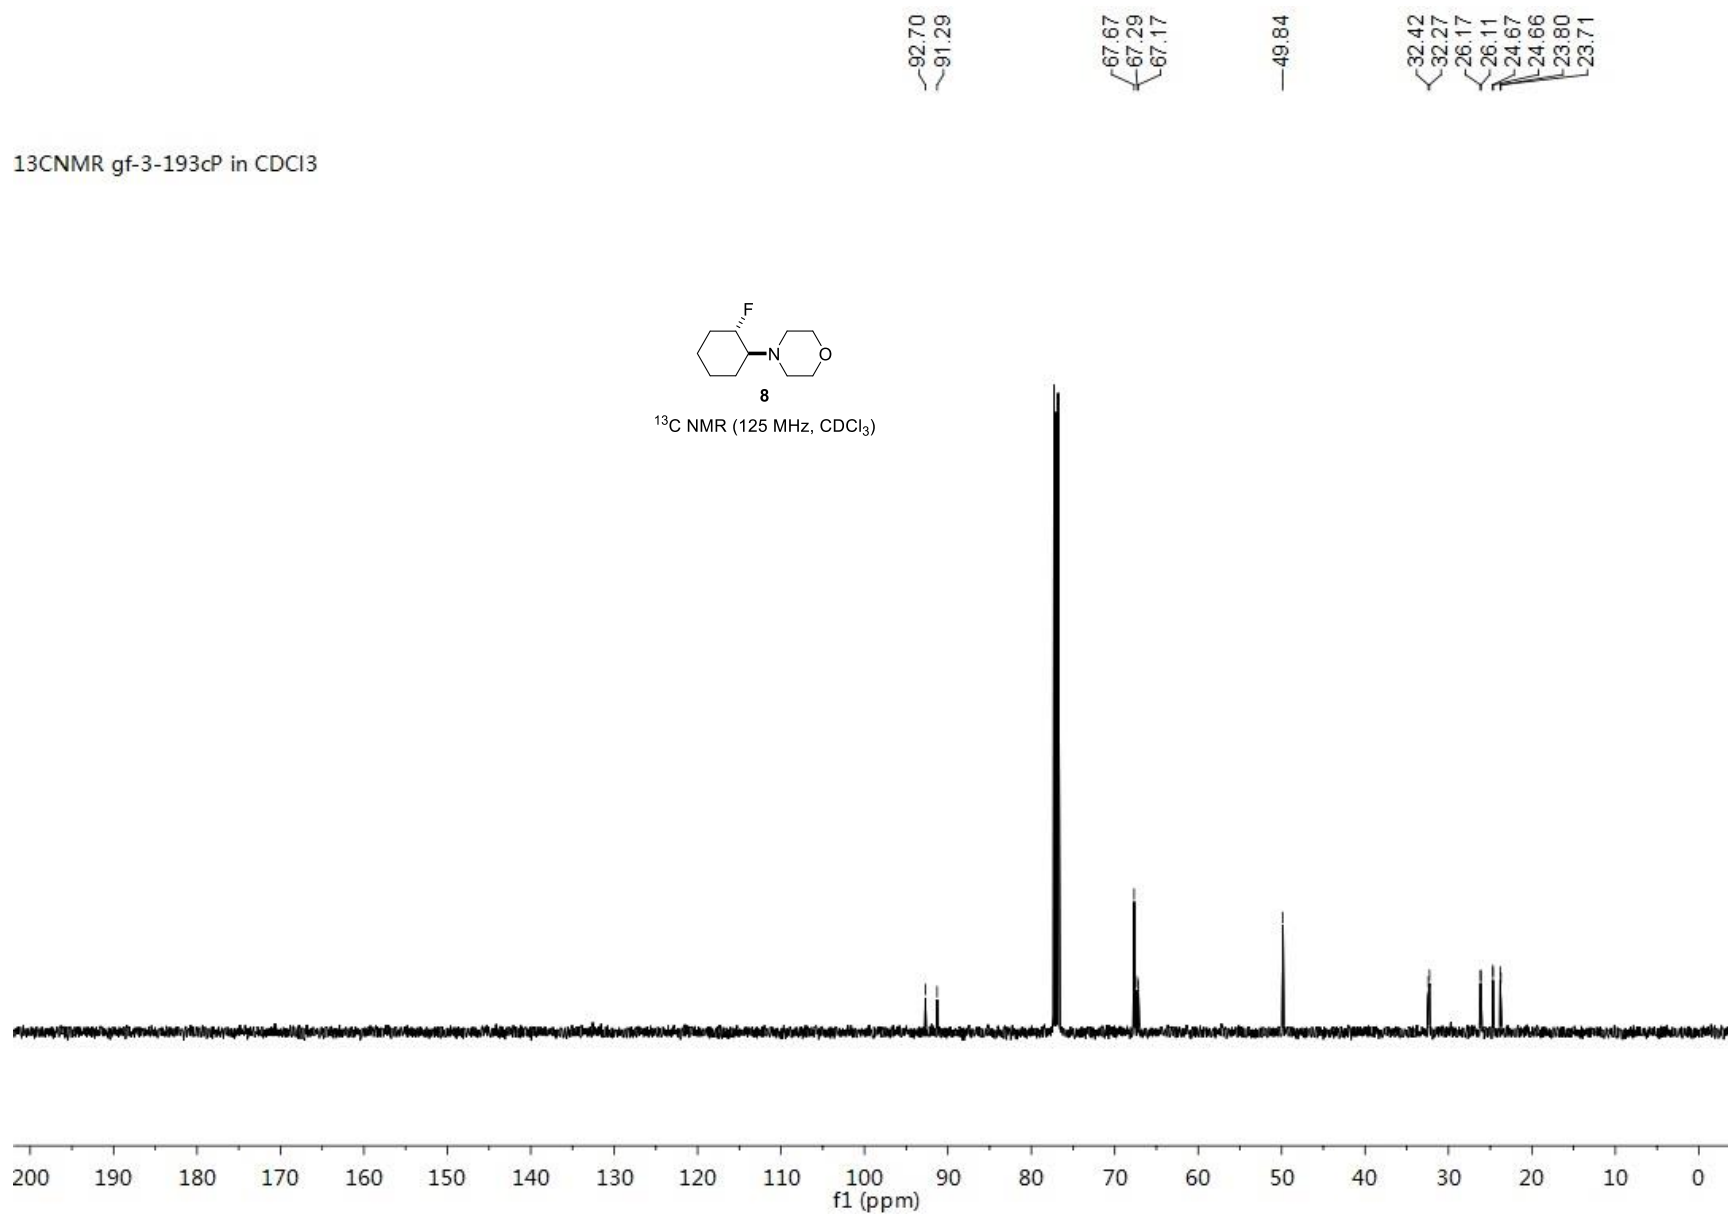

<sup>19</sup>F NMR gf-3-193cP in CDCl<sub>3</sub>

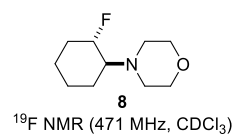

— -174.2123

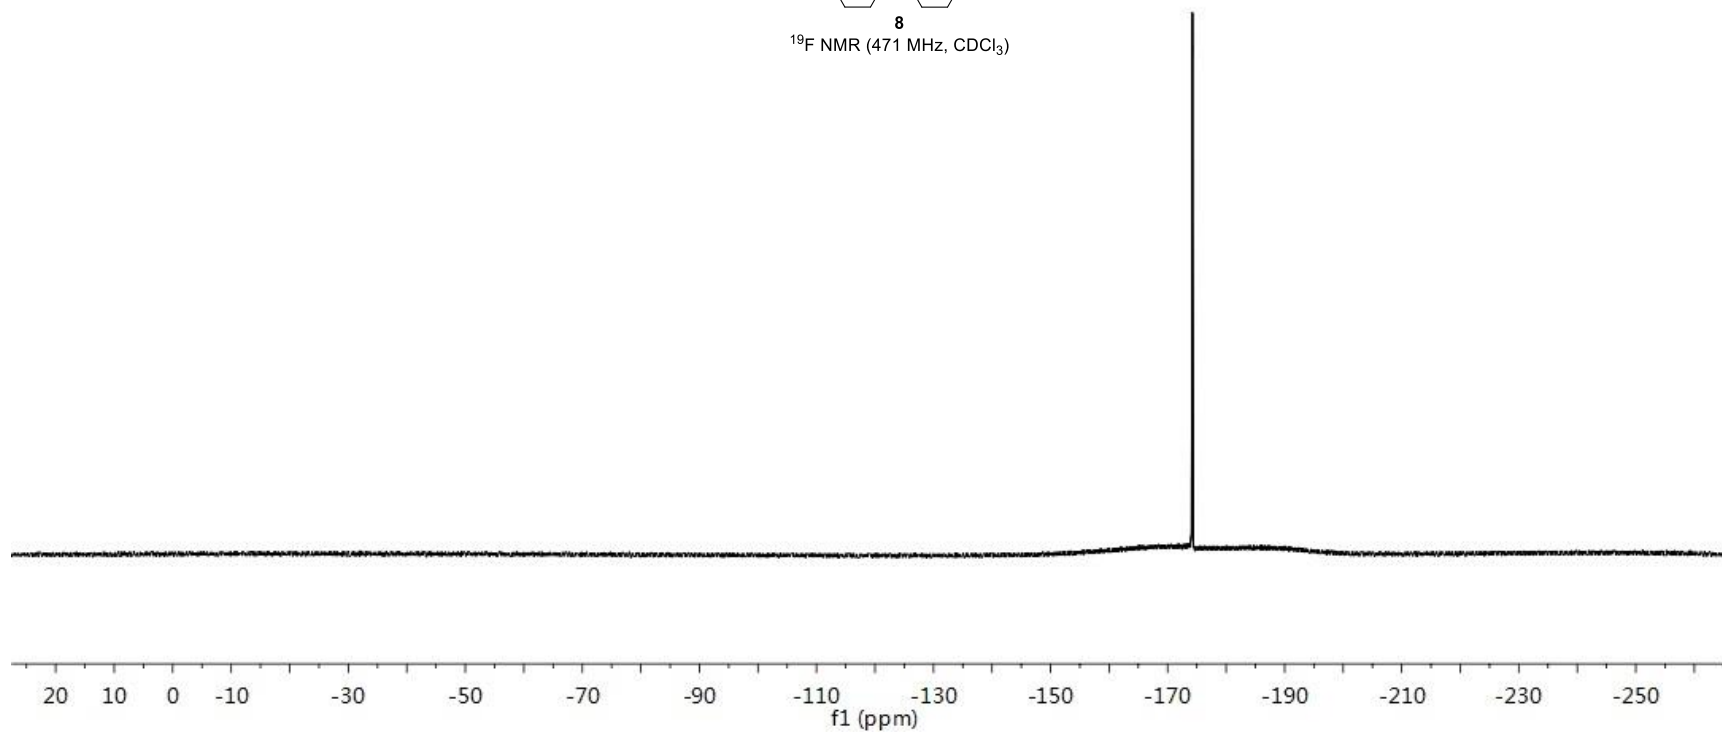

S252

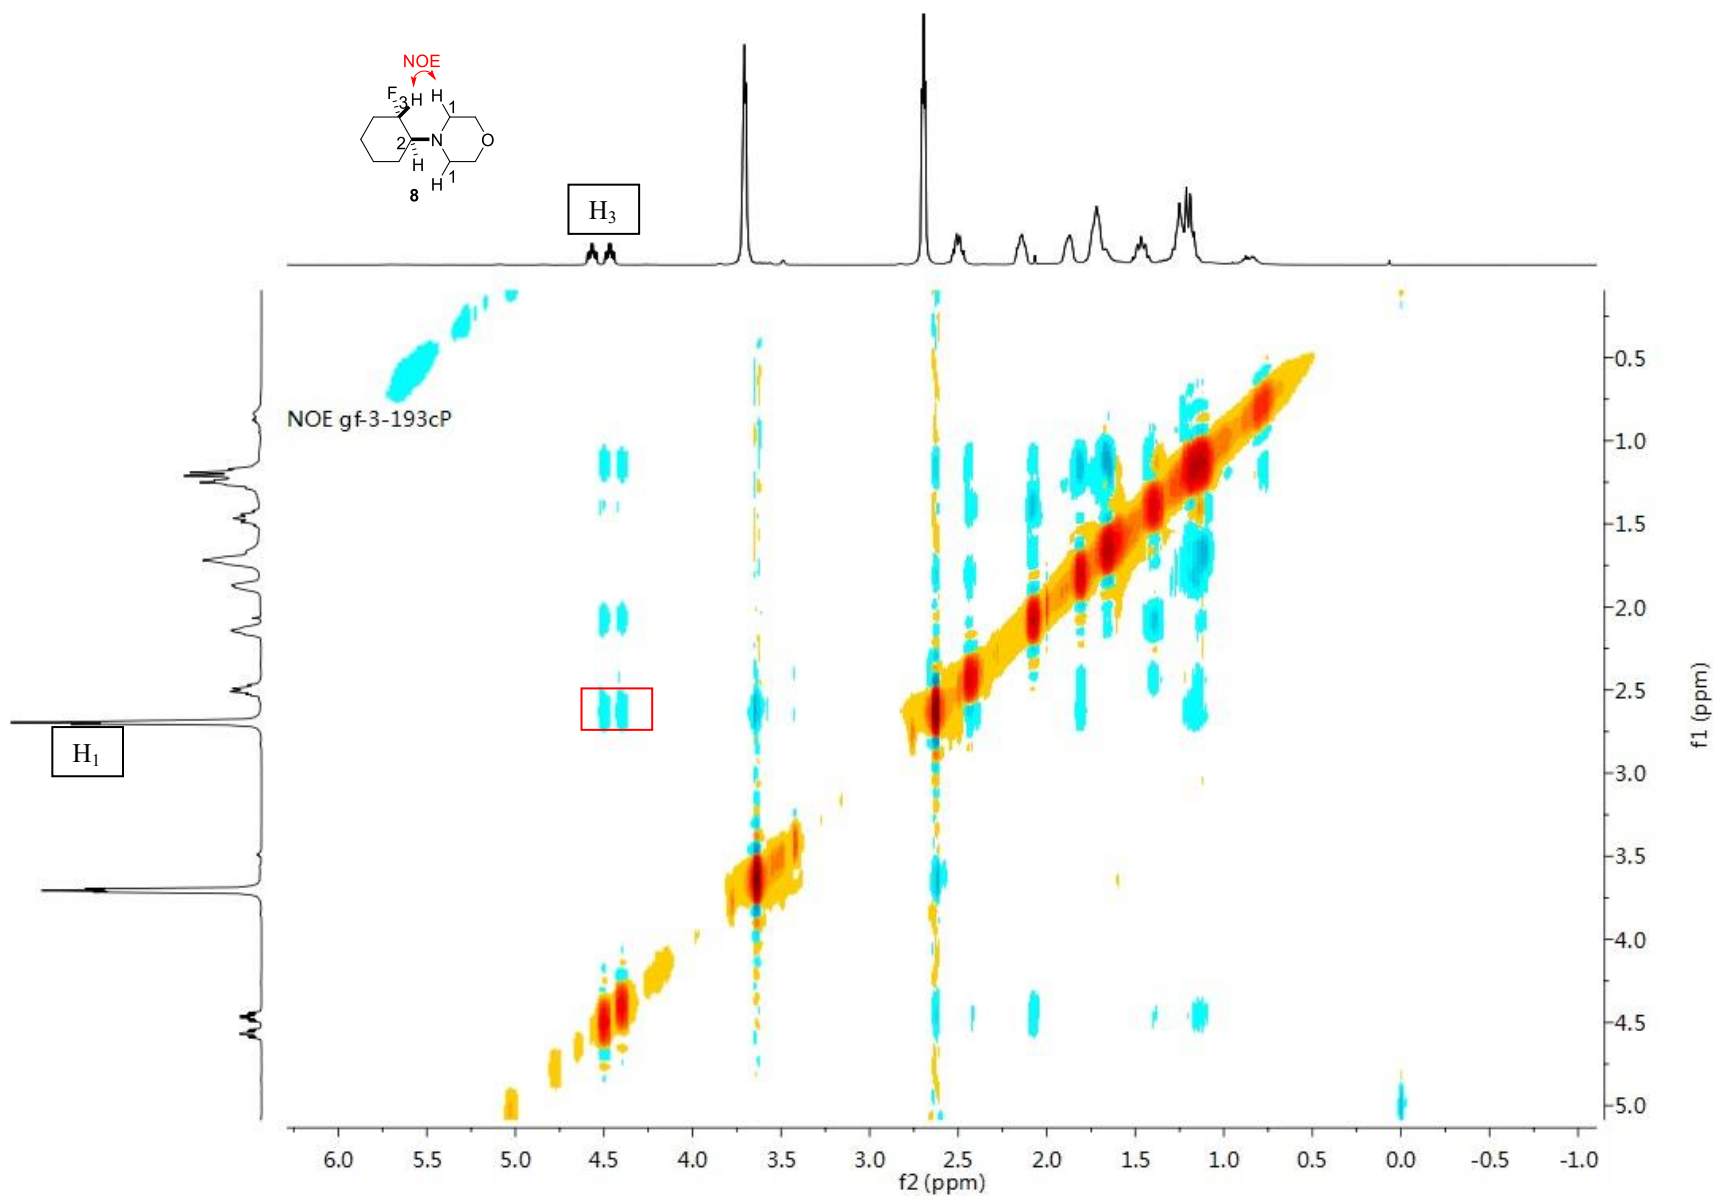

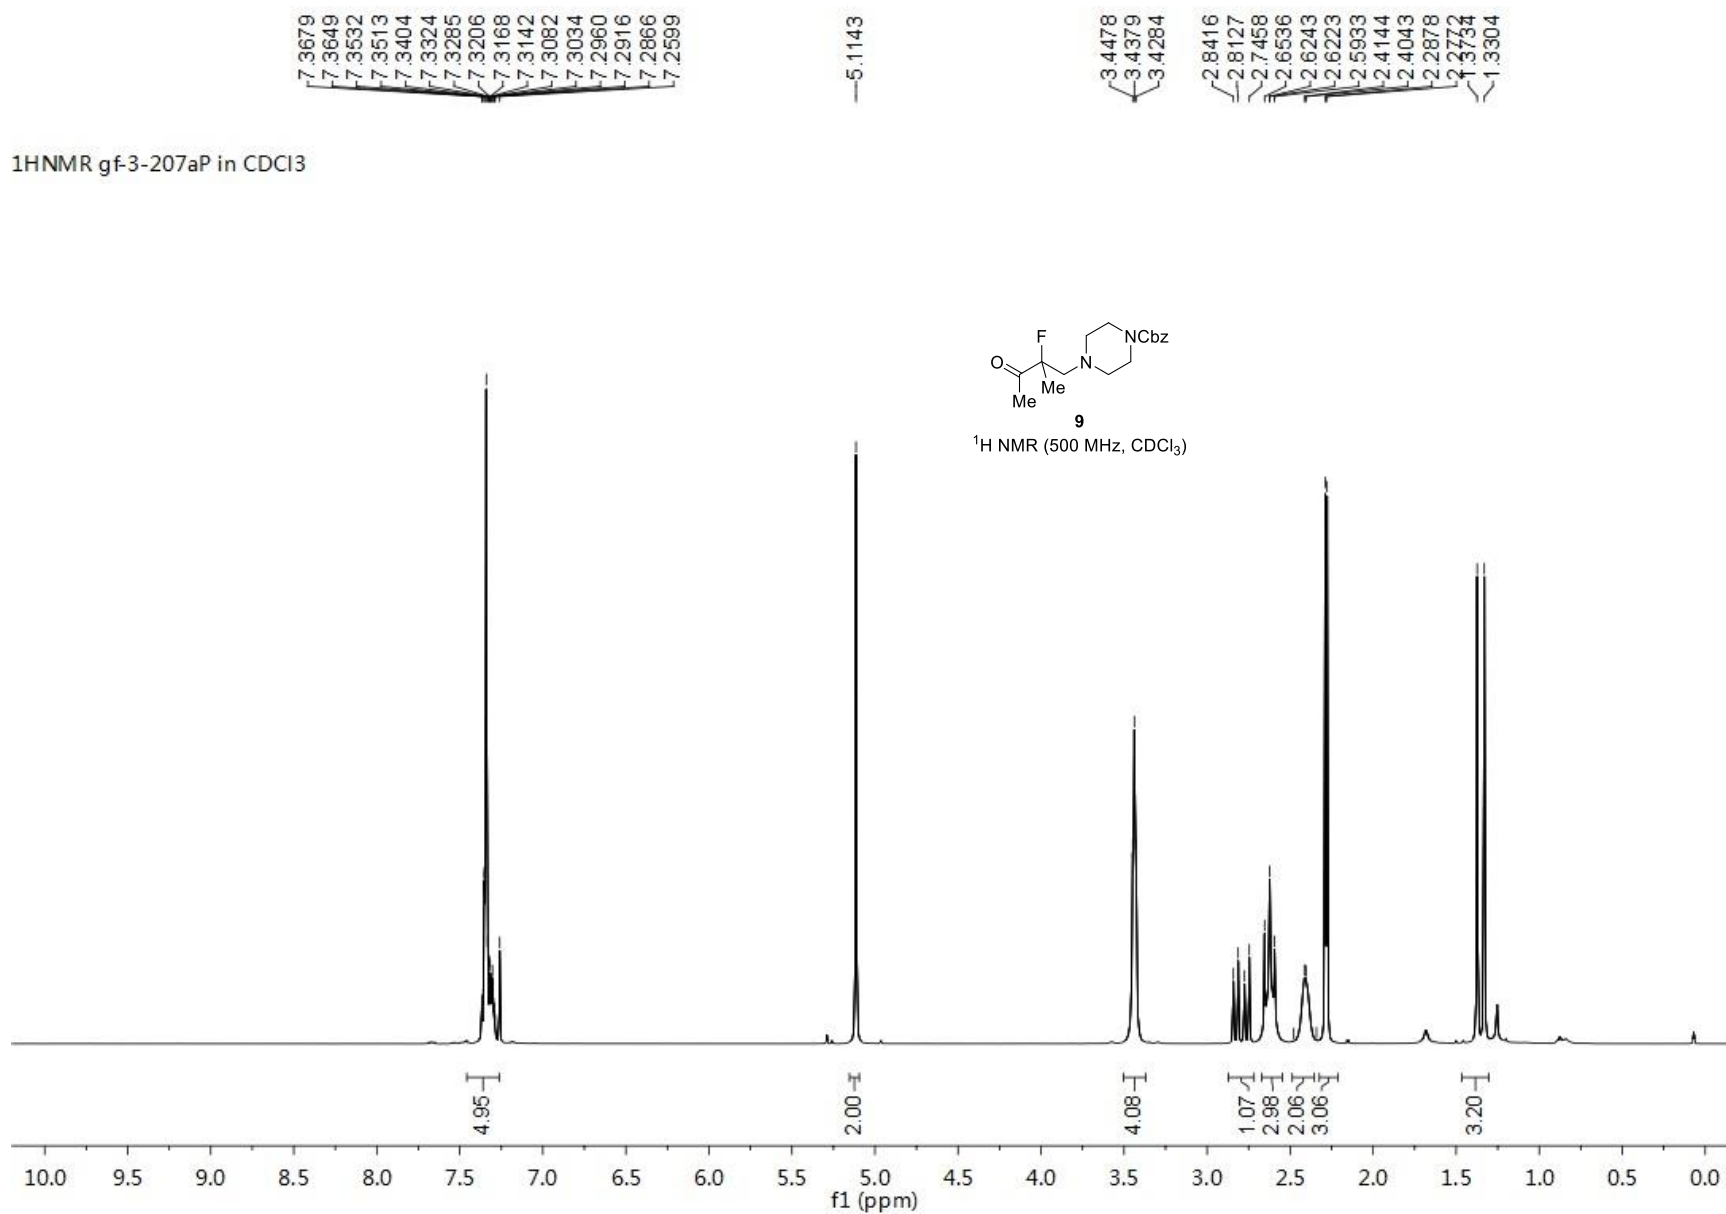

211.02  
210.78

155.20

136.74

128.50  
128.02  
127.88

103.40  
101.93

67.10  
63.98  
63.82

54.20  
54.19

44.01

26.69  
20.87  
20.68

$^{13}\text{C}$ NMR gf-3-207aP in  $\text{CDCl}_3$

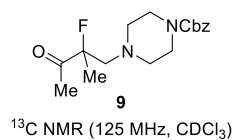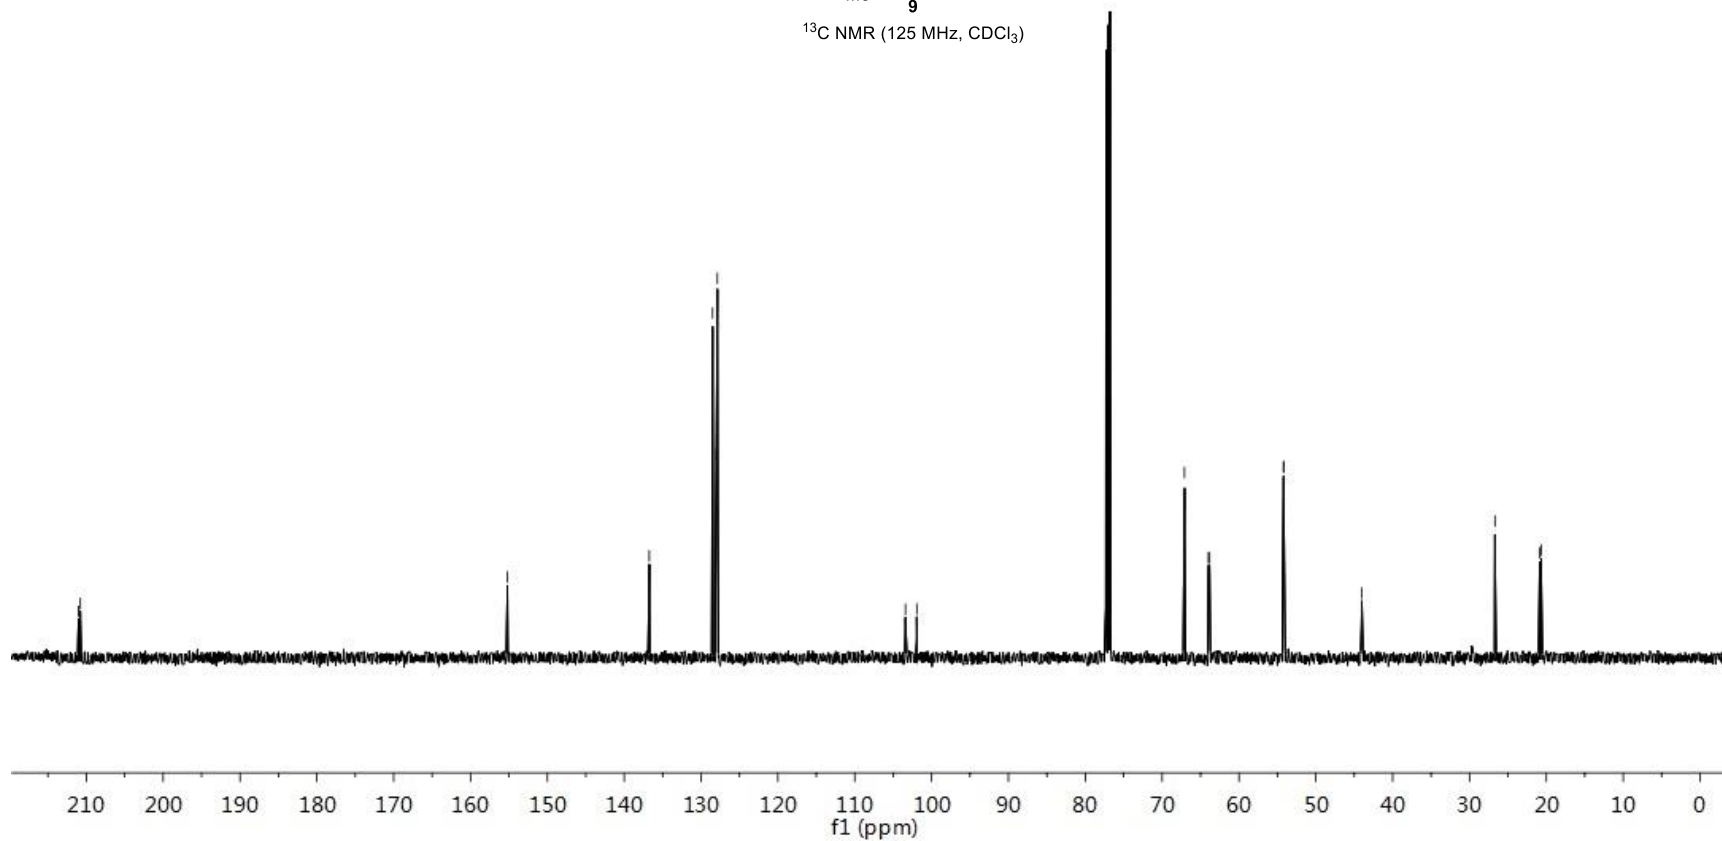



<sup>19</sup>F NMR gf-3-207aP in CDCl<sub>3</sub>

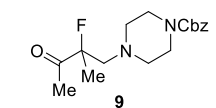

<sup>19</sup>F NMR (471 MHz, CDCl<sub>3</sub>)

---156.1125

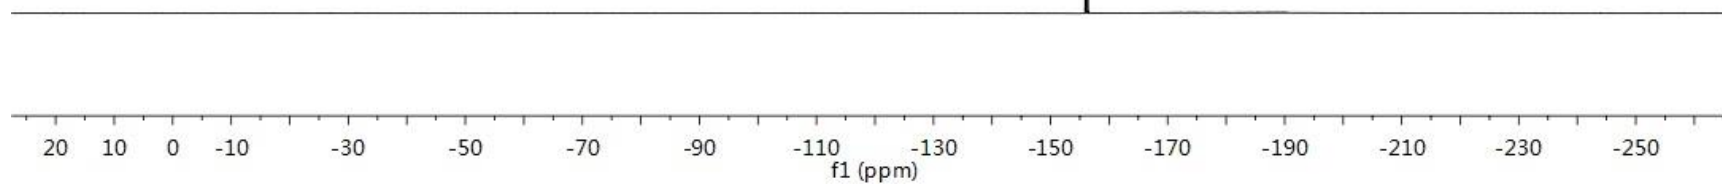

7.4341  
7.4175  
7.2602  
7.2567  
7.2400  
7.2223  
7.1568  
7.1408

5.6490  
5.6353  
5.5551  
5.5517  
5.5380

3.7488  
3.7447  
3.7361  
3.7315  
3.7237  
3.7170  
3.7108  
3.7062  
3.7032  
3.6958  
3.6814  
3.6673

2.9118  
2.8892  
2.8350  
2.8029  
2.7821  
2.4763  
2.4620

1.9322  
1.8987  
1.8747  
1.5864  
1.5721  
1.1571  
1.1529  
1.1447  
0.9115  
0.8982

<sup>1</sup>H NMR of gf-3-144aP in CDCl<sub>3</sub>

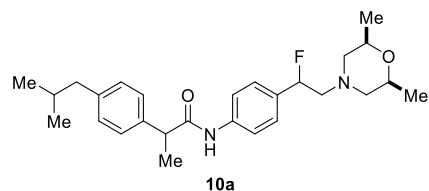

<sup>1</sup>H NMR (500 MHz, CDCl<sub>3</sub>)  
two diastereomers

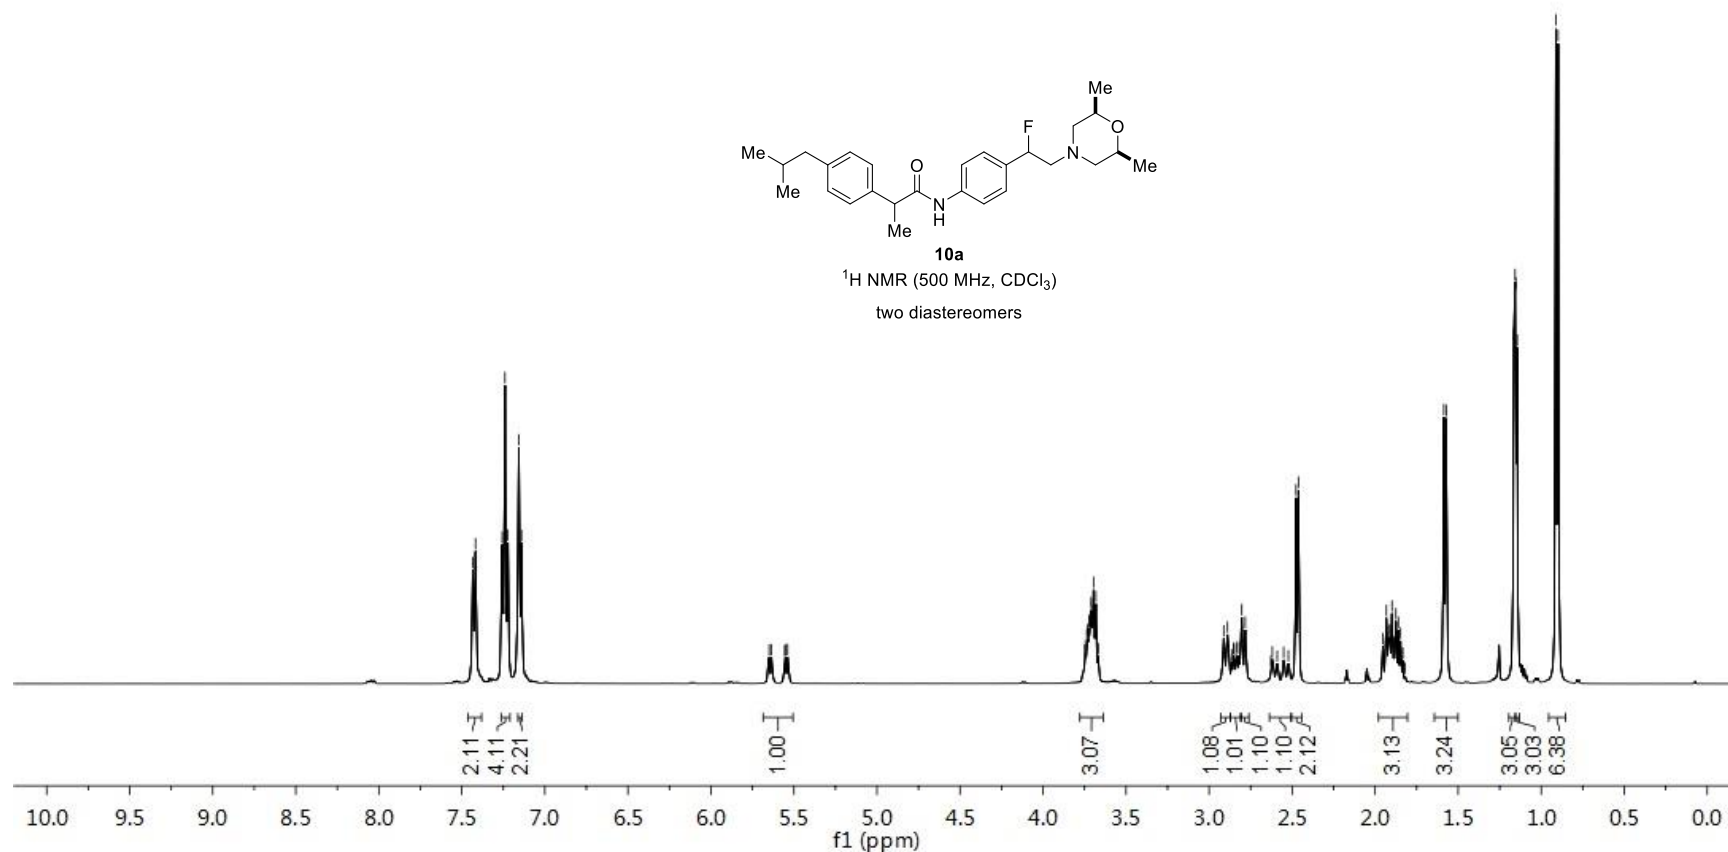

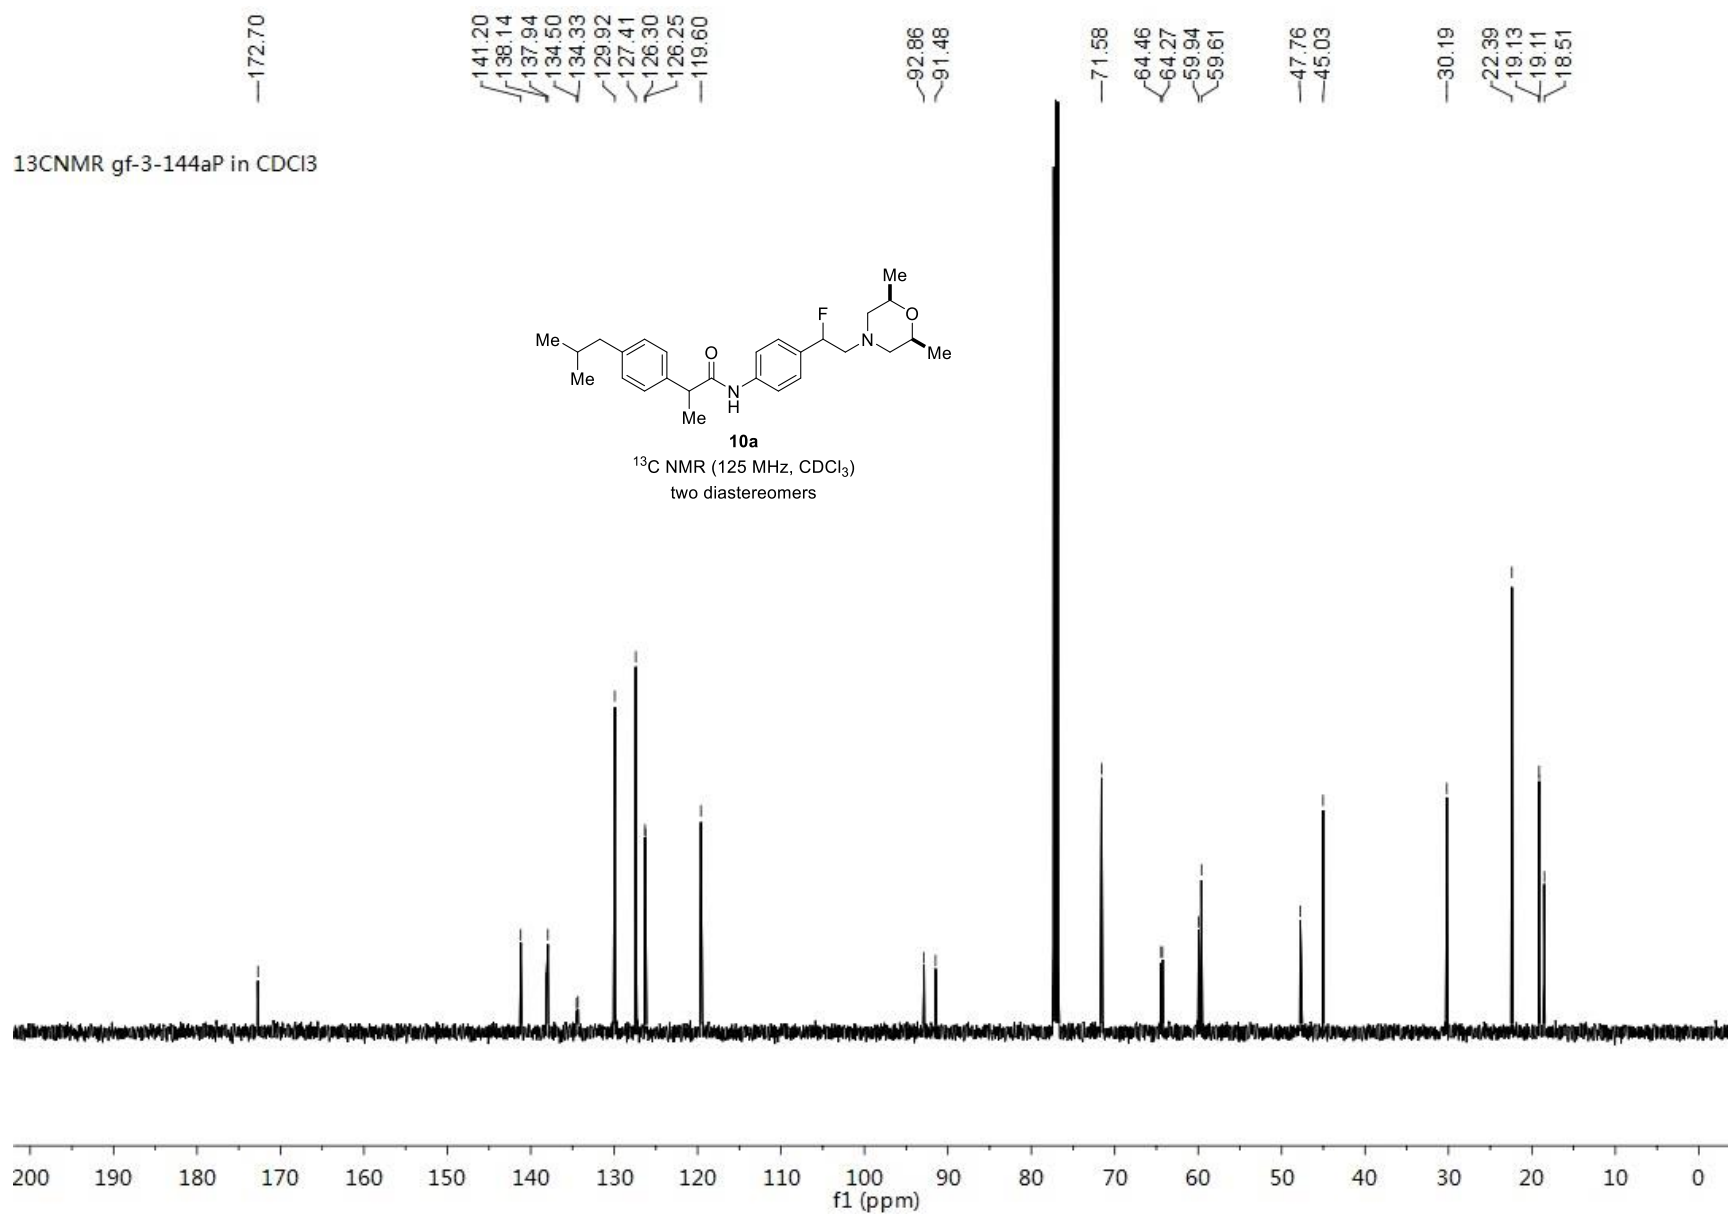

$^{19}\text{F}$ NMR gf-3-144aP in  $\text{CDCl}_3$

175.1791  
175.2007

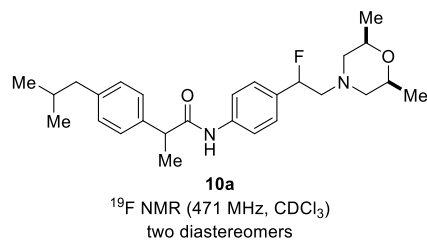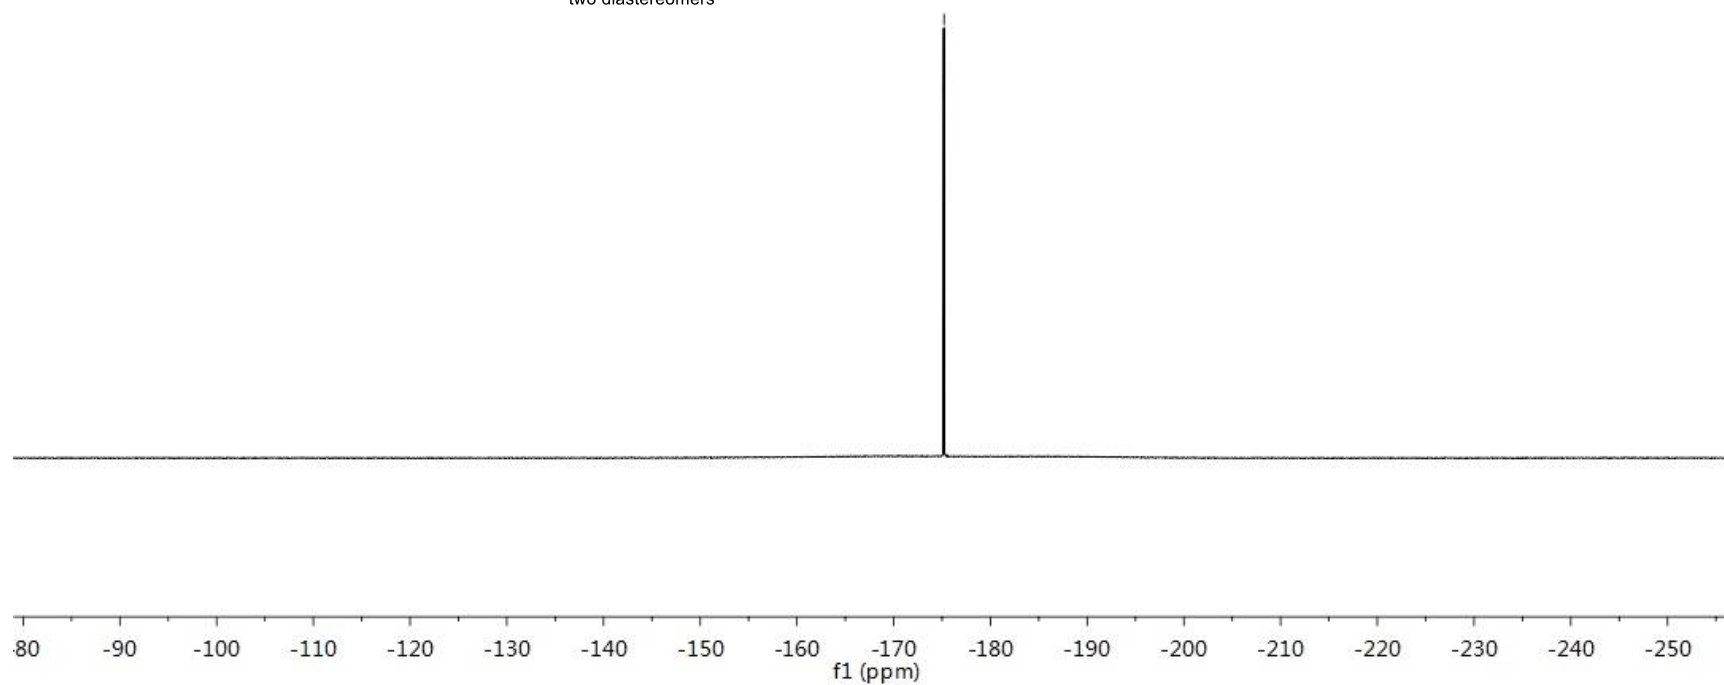

7.7624  
7.7561  
7.7466  
7.7385  
7.4421  
7.4259  
7.2604  
6.8690  
6.8514  
5.7881  
5.7839  
5.7712  
5.7672  
5.6905  
5.6864  
5.6736  
5.6694  
5.1074  
5.0949  
5.0824  
5.0699  
5.0575  
5.0454  
3.7540  
3.7459  
3.7381  
3.7338  
3.7255  
3.7212  
3.7133  
2.9162  
2.9042  
2.8967  
2.8227  
2.8009  
2.7076  
2.6694  
2.6679  
1.9663  
1.9410  
1.9195  
1.6573  
1.2059  
1.1934  
1.1824  
1.1762  
1.1698  
1.1636

<sup>1</sup>H NMR of gf-3-106aP in CDCl<sub>3</sub>

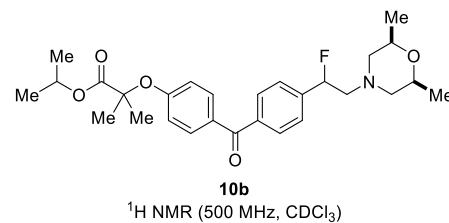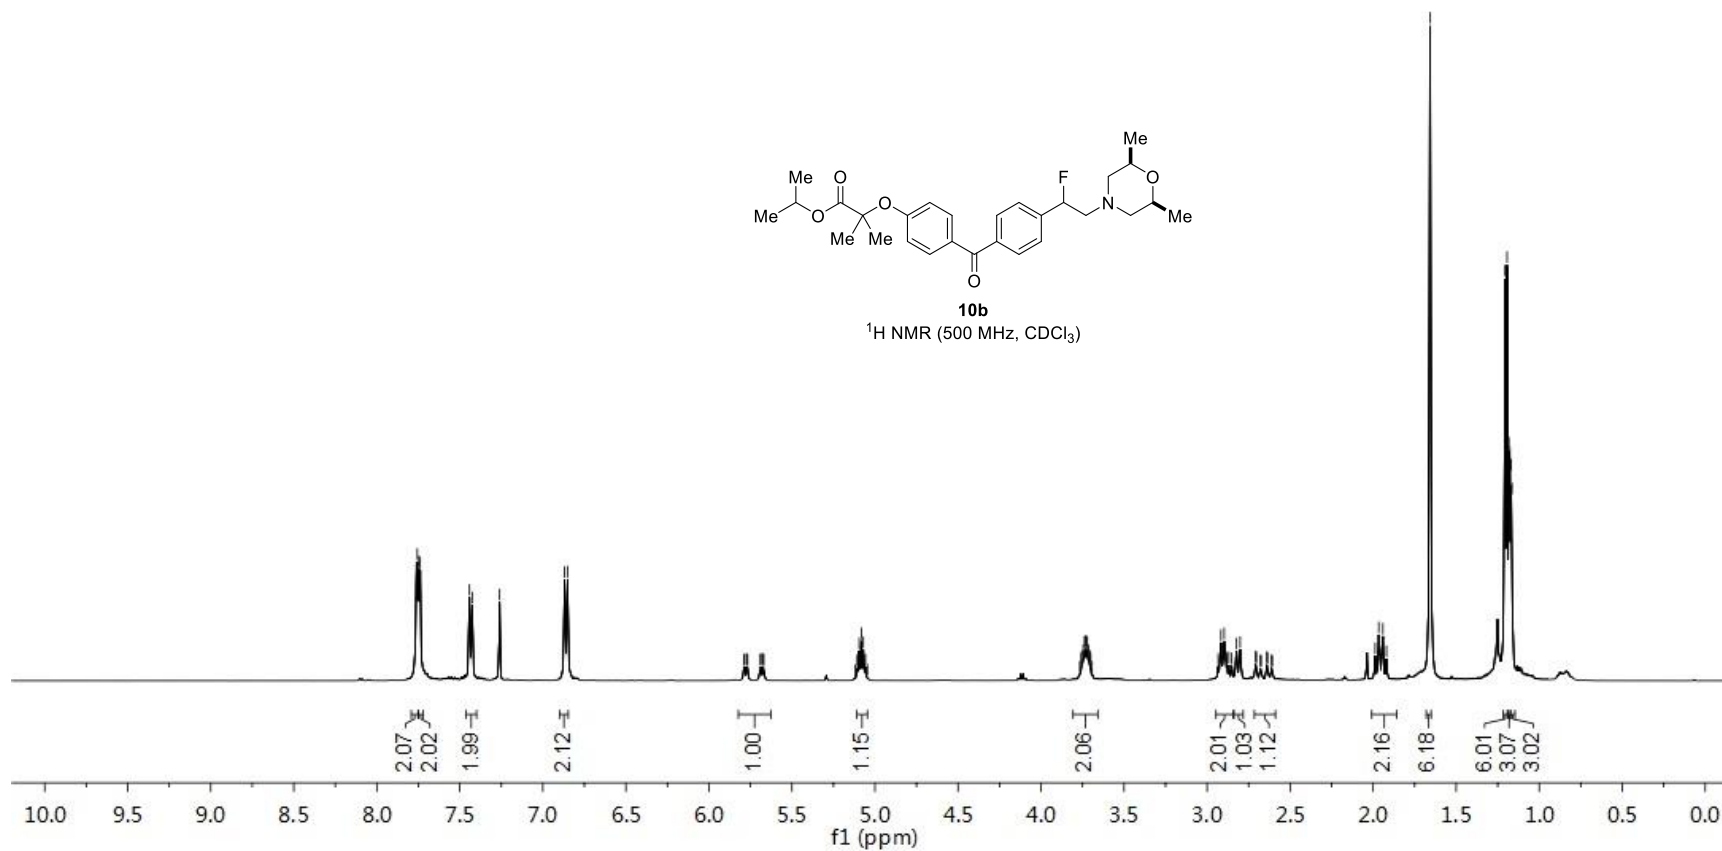

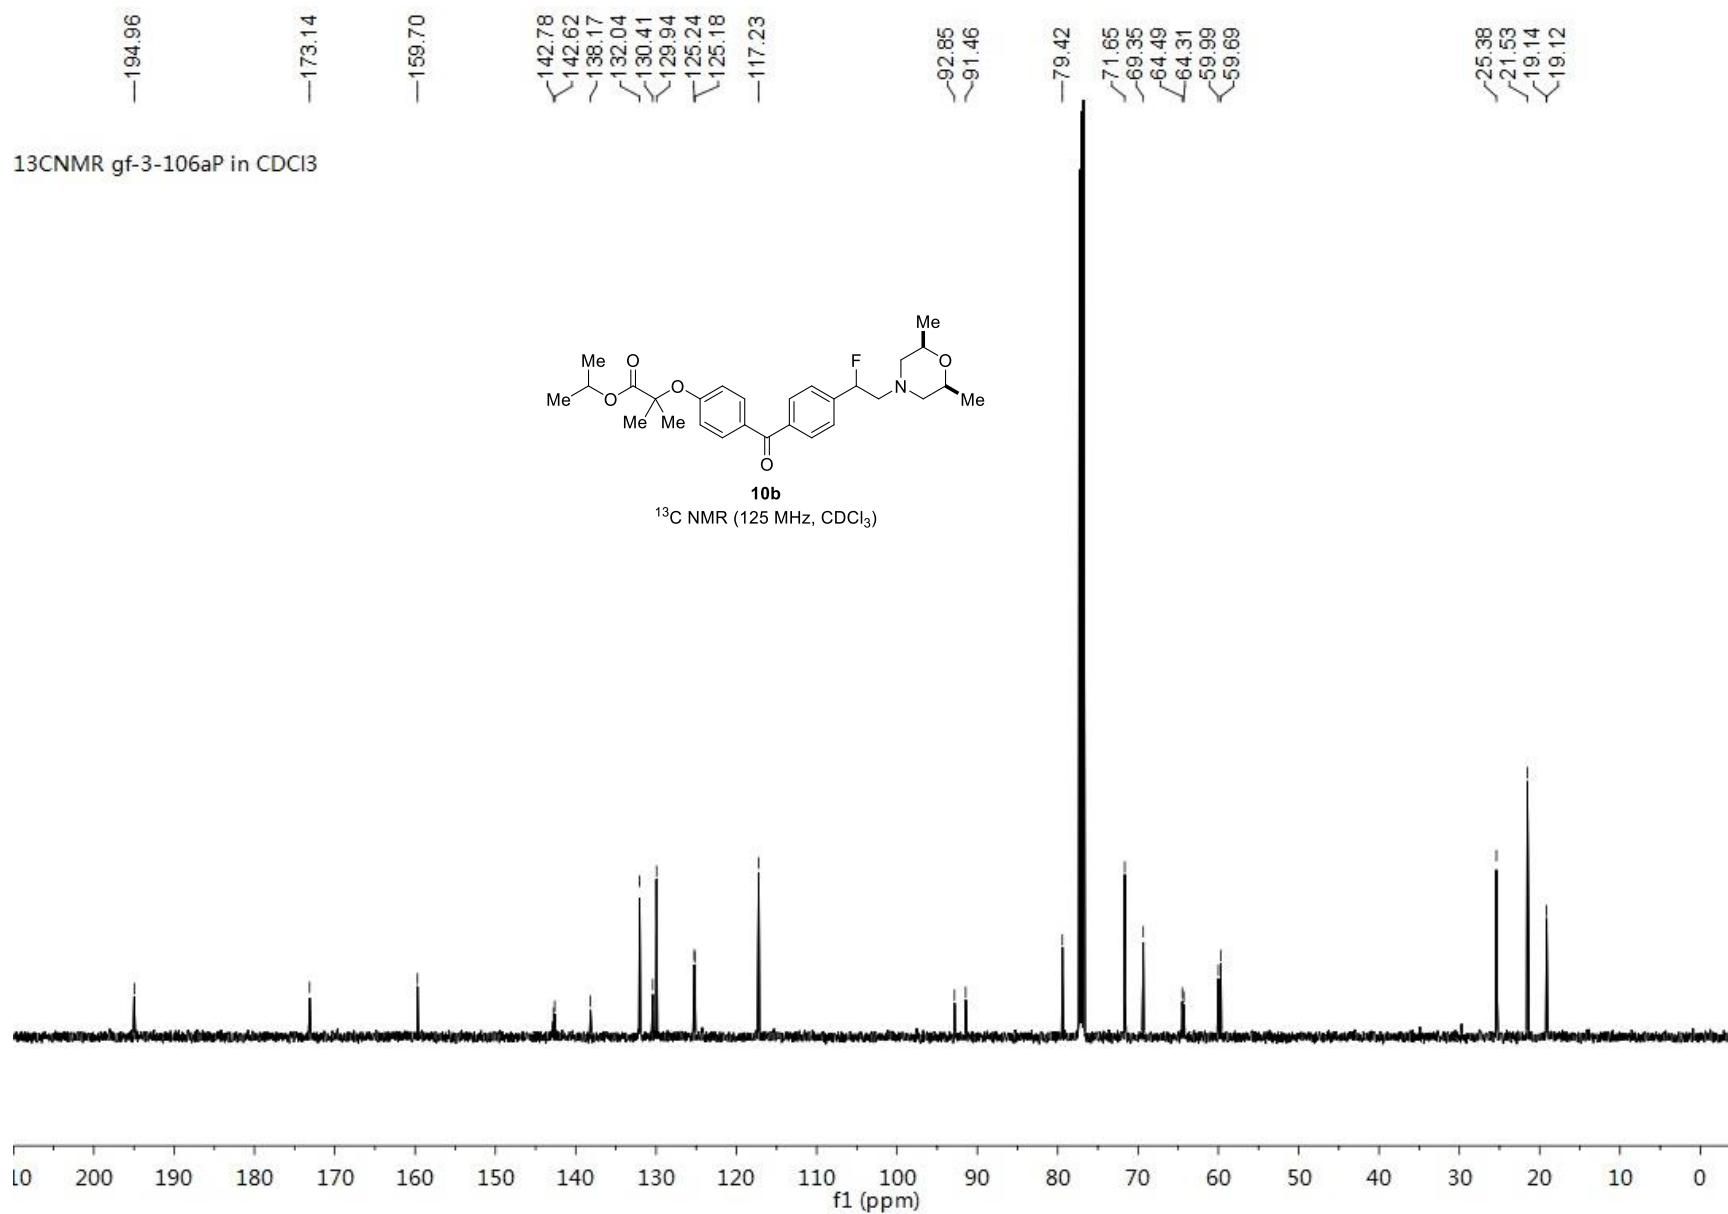

<sup>19</sup>F NMR gf-3-106aP in CDCl<sub>3</sub>

---179.4938

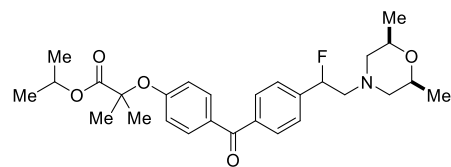

**10b**

<sup>19</sup>F NMR (471 MHz, CDCl<sub>3</sub>)

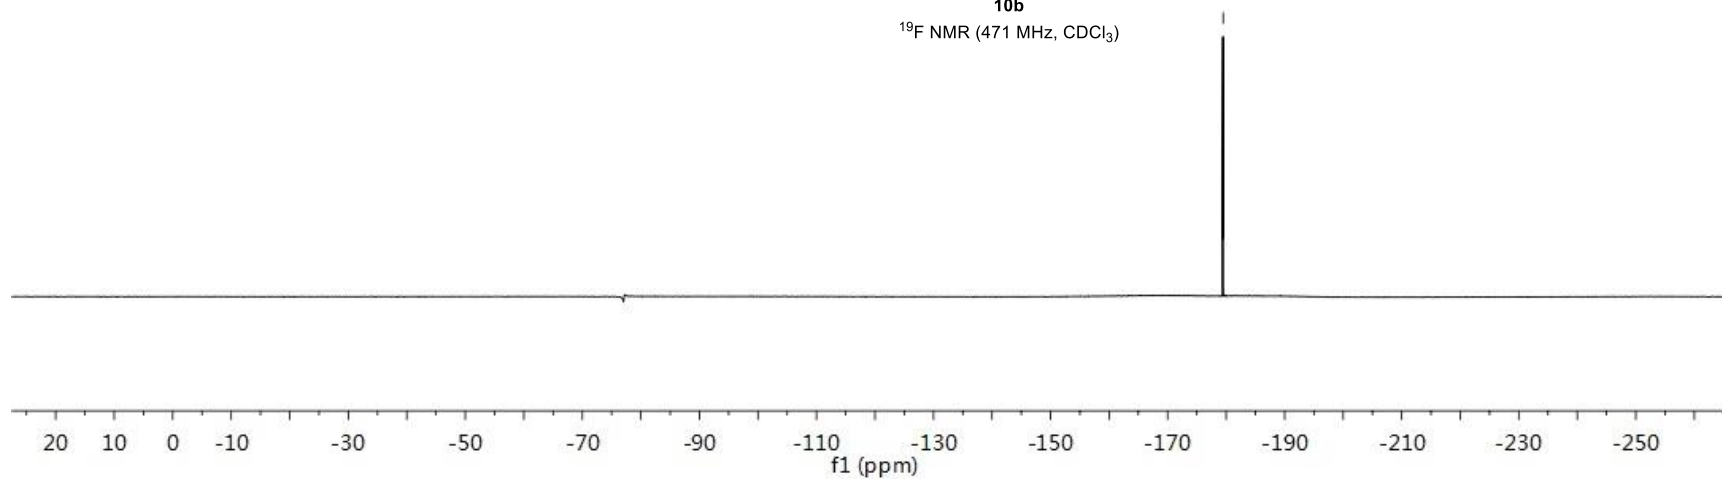

7.6743  
7.6579  
7.4929  
7.4764  
7.4086  
7.3922  
7.3751  
7.2597  
7.2501  
7.2338  
6.9366  
6.8777  
6.8597  
6.7212  
6.7067

5.6443  
5.6292  
5.5470  
5.5321

3.8000  
3.7425  
3.7146  
3.7112  
3.7022  
3.6994  
3.6696

2.8866  
2.8652  
2.8416  
2.8241  
2.7843  
2.7622  
2.4445

1.9399  
1.9185  
1.9082  
1.8971  
1.8820  
1.1555  
1.1503  
1.1438

<sup>1</sup>H NMR of gf-3-105aP in CDCl<sub>3</sub>

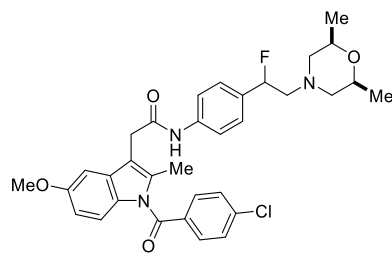

<sup>1</sup>H NMR (500 MHz, CDCl<sub>3</sub>)

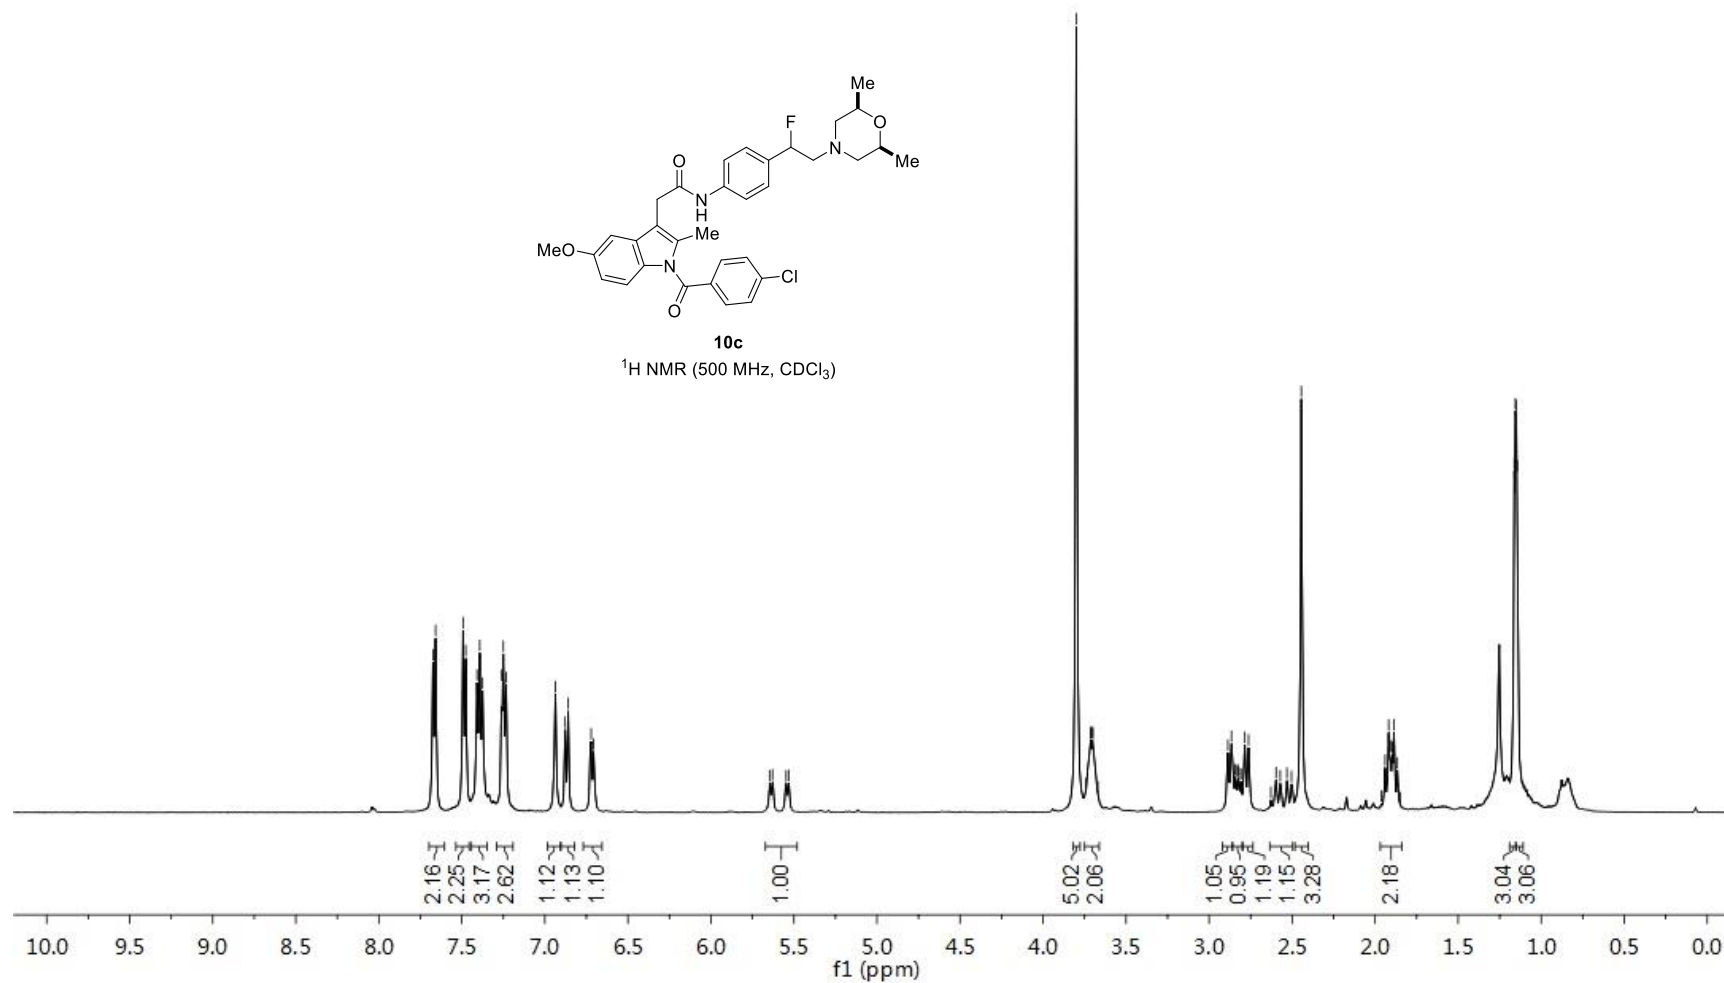



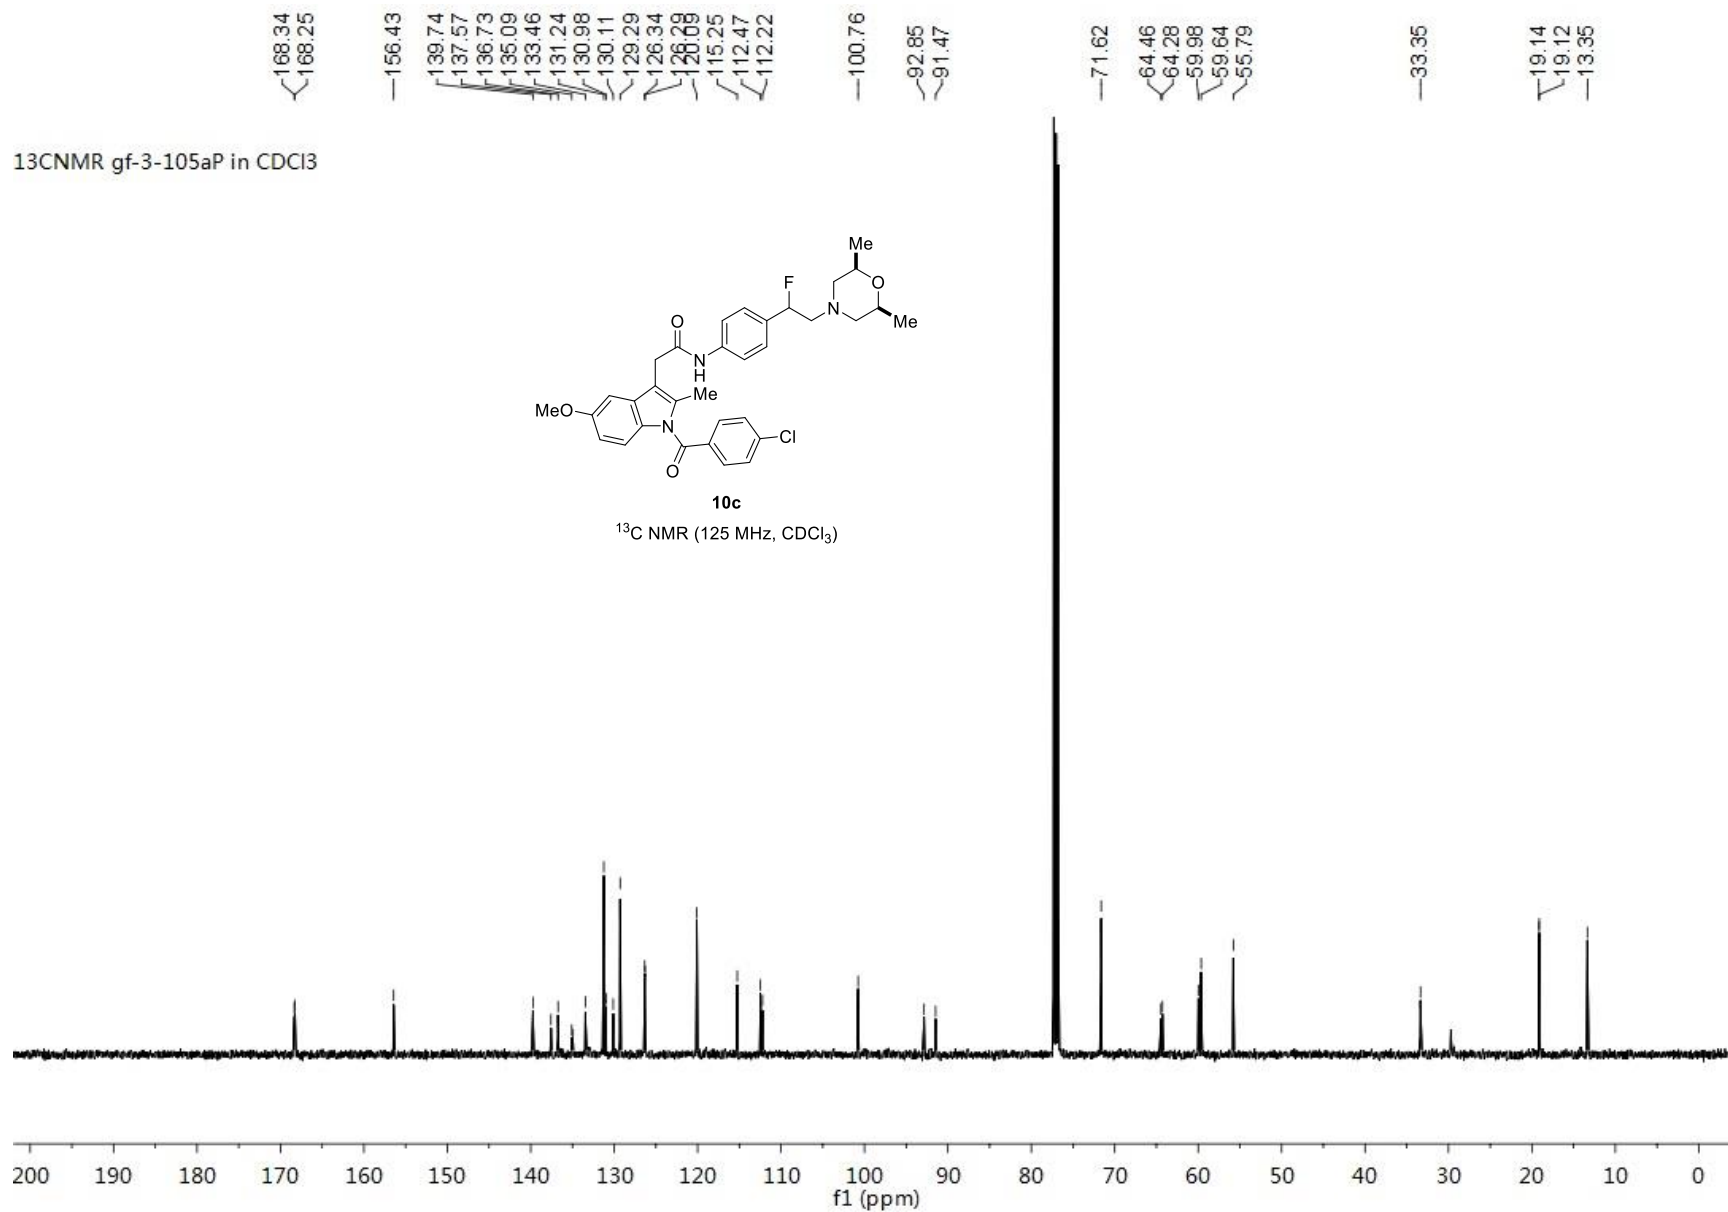

<sup>19</sup>F NMR gf-3-105aP in CDCl<sub>3</sub>

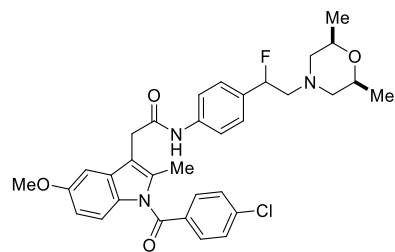

<sup>19</sup>F NMR (471 MHz, CDCl<sub>3</sub>)

-175.5886

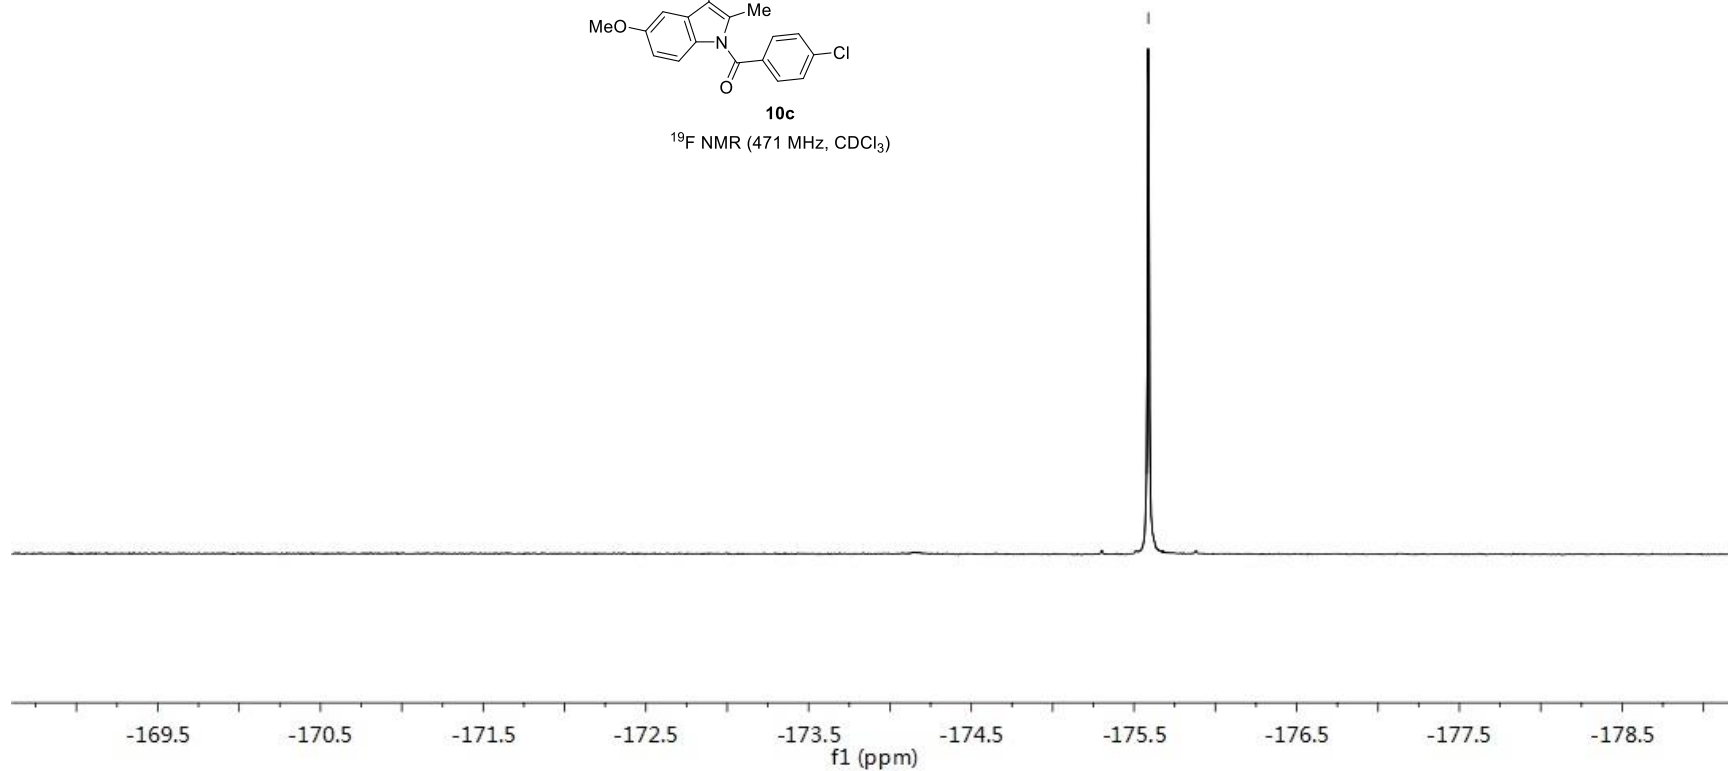

7.3714  
7.3548  
7.3432  
7.3317  
7.3220  
7.3162  
7.3028  
7.2465  
7.2307  
7.1081  
7.0925  
5.6800  
5.6762  
5.6624  
5.6586  
5.5822  
5.5784  
5.5646  
5.5610  
5.2305  
5.2170  
5.1228  
5.0982  
5.0876  
5.0625  
4.6804  
4.6688  
4.6535  
4.6418  
3.7556  
3.7513  
3.7432  
3.7352  
3.7224  
3.7033  
3.6988  
3.6904  
3.6866  
3.6729  
3.1618  
3.1381  
3.1352  
3.1046  
3.0946  
3.0844  
3.0675  
2.9091  
2.8870  
2.8757  
2.8643  
2.8585  
2.8466  
2.8412  
2.8298  
2.8043  
2.7823  
2.6229  
2.5943  
2.5534  
2.5249  
1.9510  
1.9296  
1.9153  
1.9084  
1.8944  
1.8733  
1.1751  
1.1700  
1.1625  
1.1575

<sup>1</sup>H NMR of **10d** in CDCl<sub>3</sub>

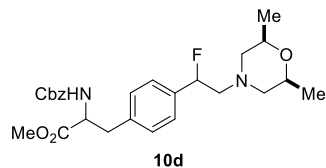

<sup>1</sup>H NMR (500 MHz, CDCl<sub>3</sub>)  
two diastereomers

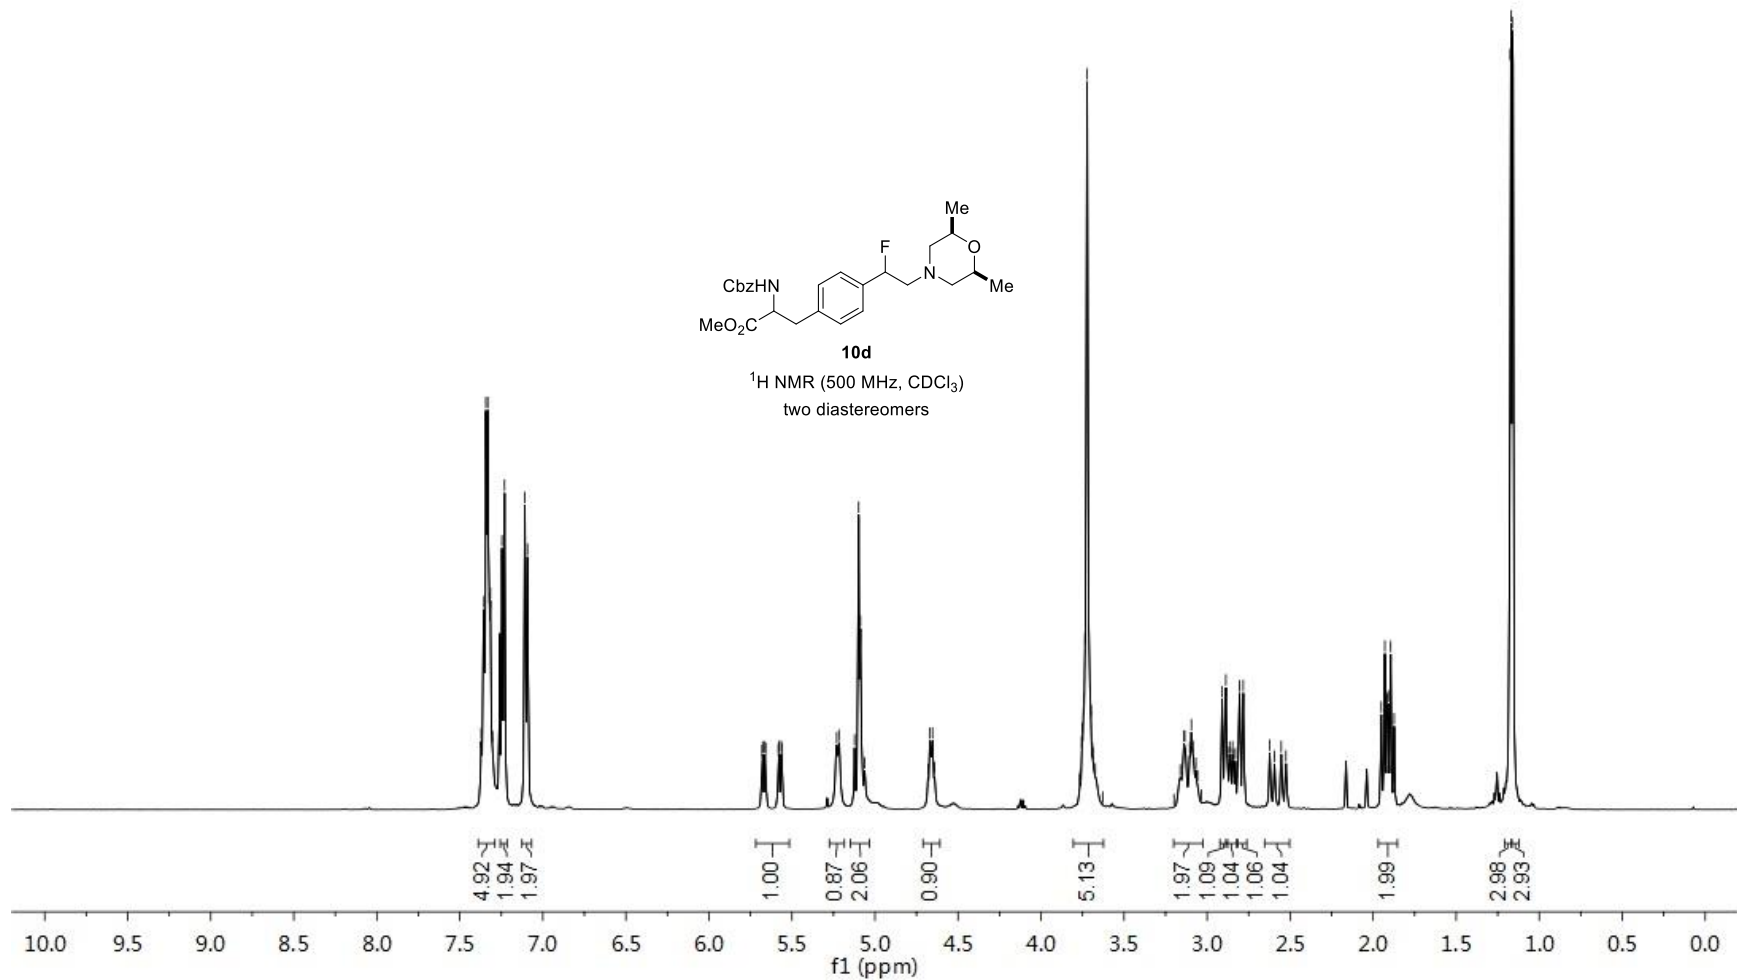

—171.84

—155.60

137.78

137.62

136.20

136.07

129.45

128.56

128.26

128.12

125.84

125.79

93.05

91.67

71.66

71.64

67.03

64.60

64.42

60.07

59.64

54.71

52.40

37.88

37.87

19.16

19.13

<sup>13</sup>CNMR gf-3-112aP in CDCl<sub>3</sub>

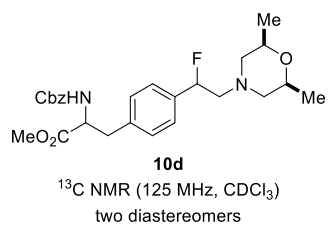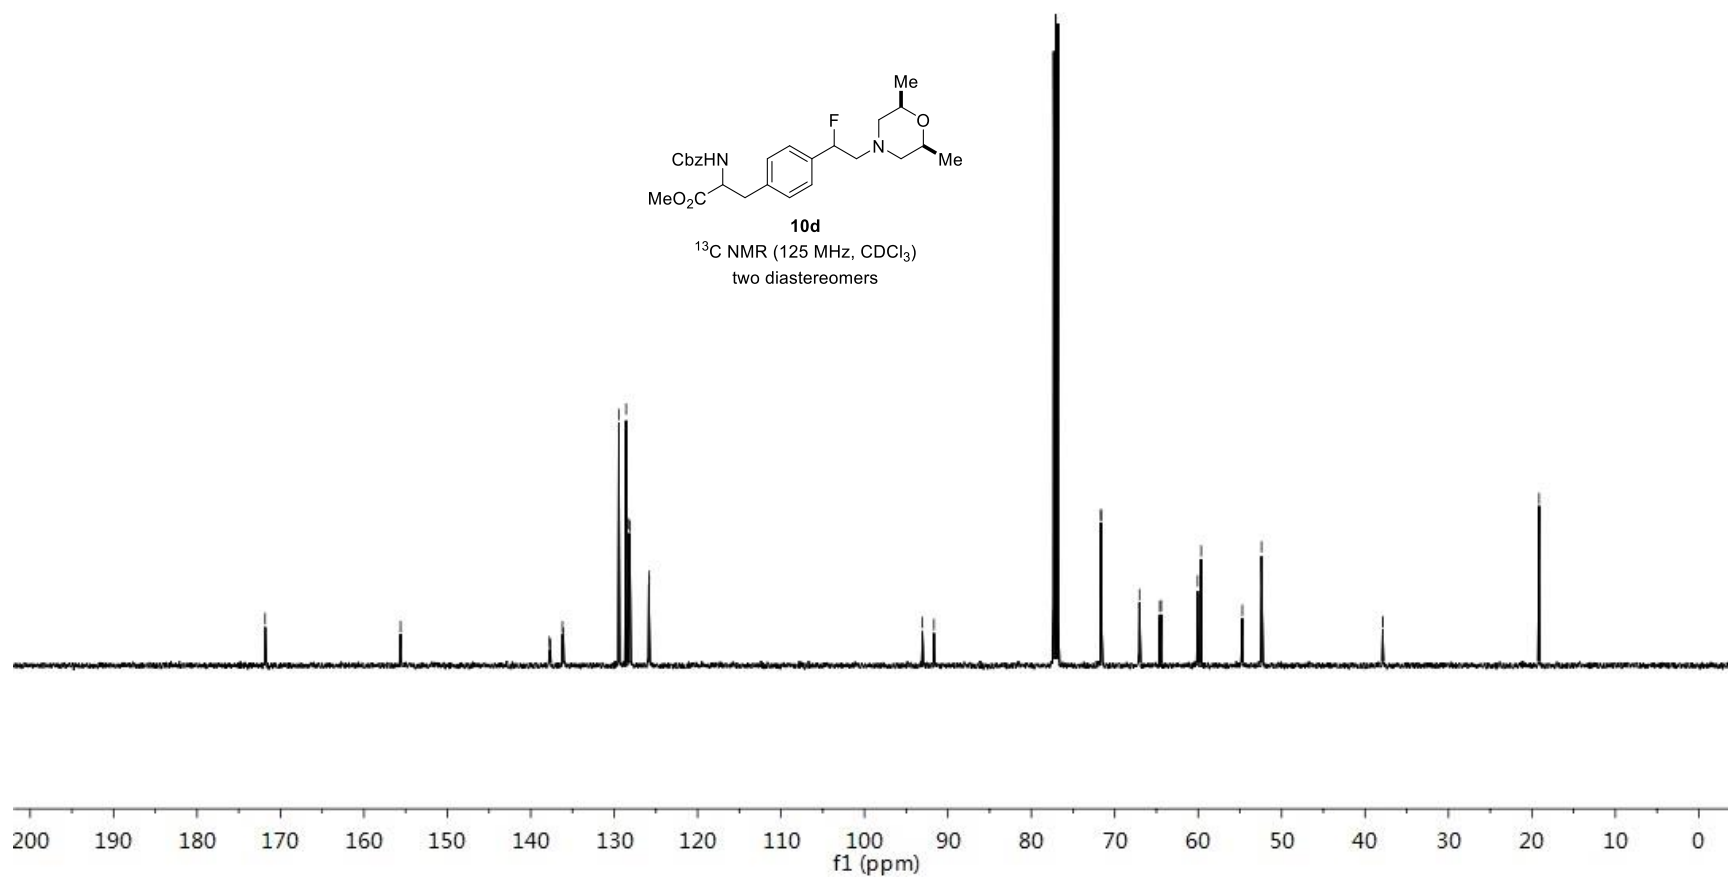

<sup>19</sup>F NMR gf-3-112aP in CDCl<sub>3</sub>

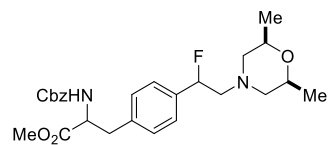

<sup>19</sup>F NMR (471 MHz, CDCl<sub>3</sub>)  
two diastereomers

176.6776  
176.6847

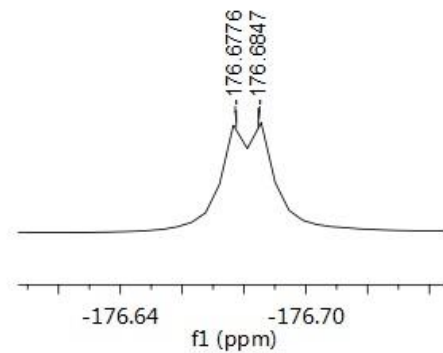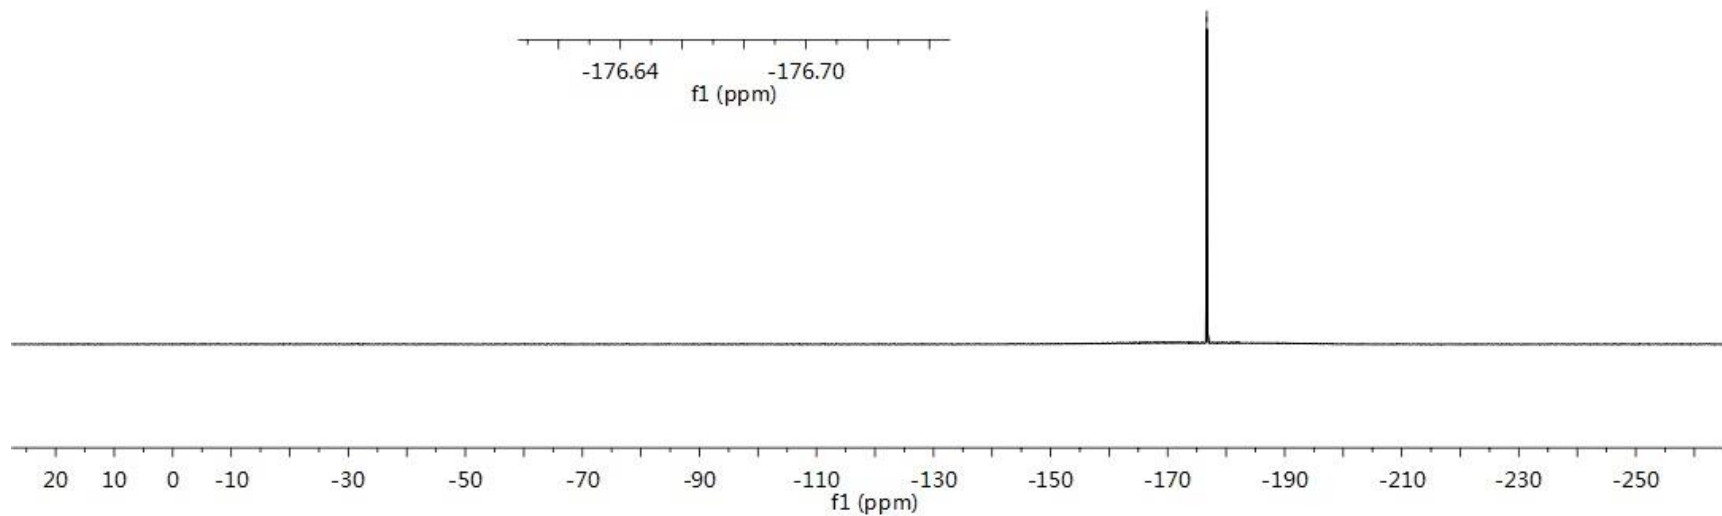

7.3088  
7.2927  
7.2598  
7.1252  
7.1091  
7.0785  
3.7641  
3.7548  
3.7455  
2.9561  
2.9384  
2.9285  
2.9217  
2.9102  
2.9042  
2.8933  
2.8753  
2.6739  
2.6702  
2.6412  
2.6308  
2.6162  
2.6054  
2.5993  
2.5837  
2.5753  
2.5338  
2.5161  
2.4955  
2.4785  
2.4385  
2.4083  
2.3028  
2.1642  
2.1459  
2.1262  
2.1086  
2.0892  
2.0781  
2.0651  
2.0538  
2.0482  
2.0400  
2.0230  
2.0175  
1.9812  
1.9760  
1.9625  
1.9574  
1.6479  
1.6304  
1.6233  
1.6176  
1.6125  
1.6064  
1.5999  
1.5786  
1.5567  
1.5478  
1.5362  
1.5261  
1.5095  
1.5008  
1.4917  
1.4855  
1.4762  
1.4711  
1.4585  
1.4527  
0.9069

<sup>1</sup>H NMR of **10e** in CDCl<sub>3</sub>

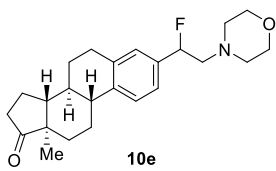

<sup>1</sup>H NMR (500 MHz, CDCl<sub>3</sub>)  
two diastereomers

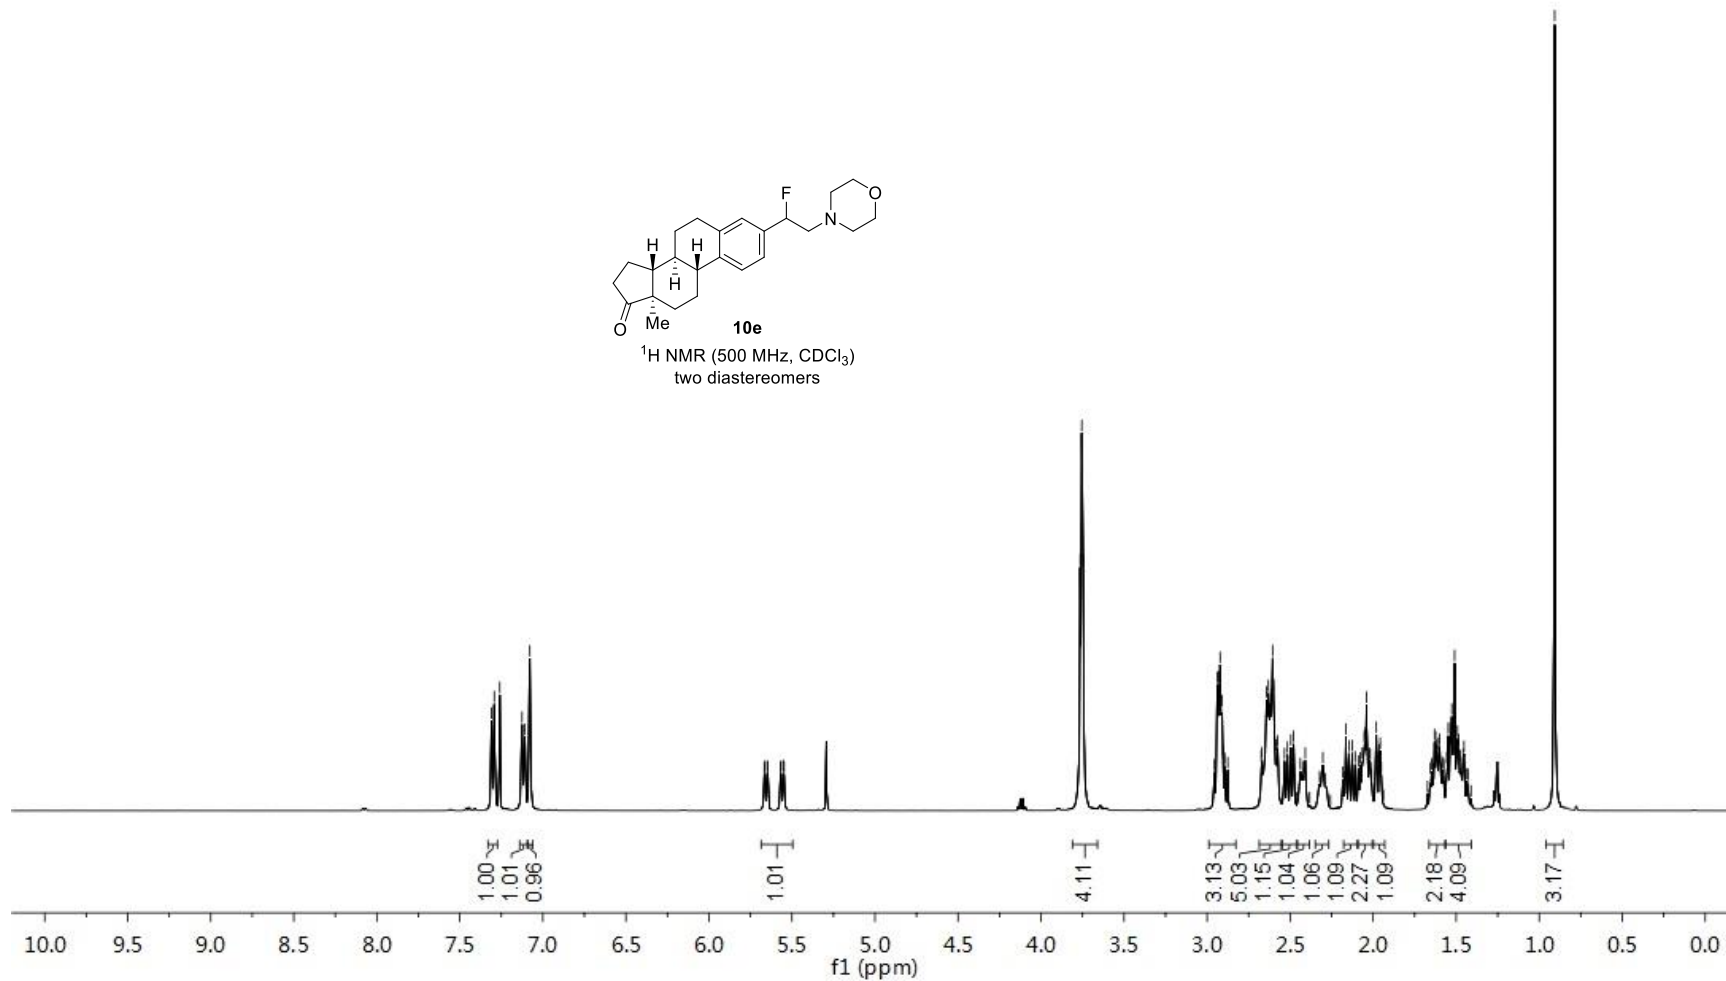

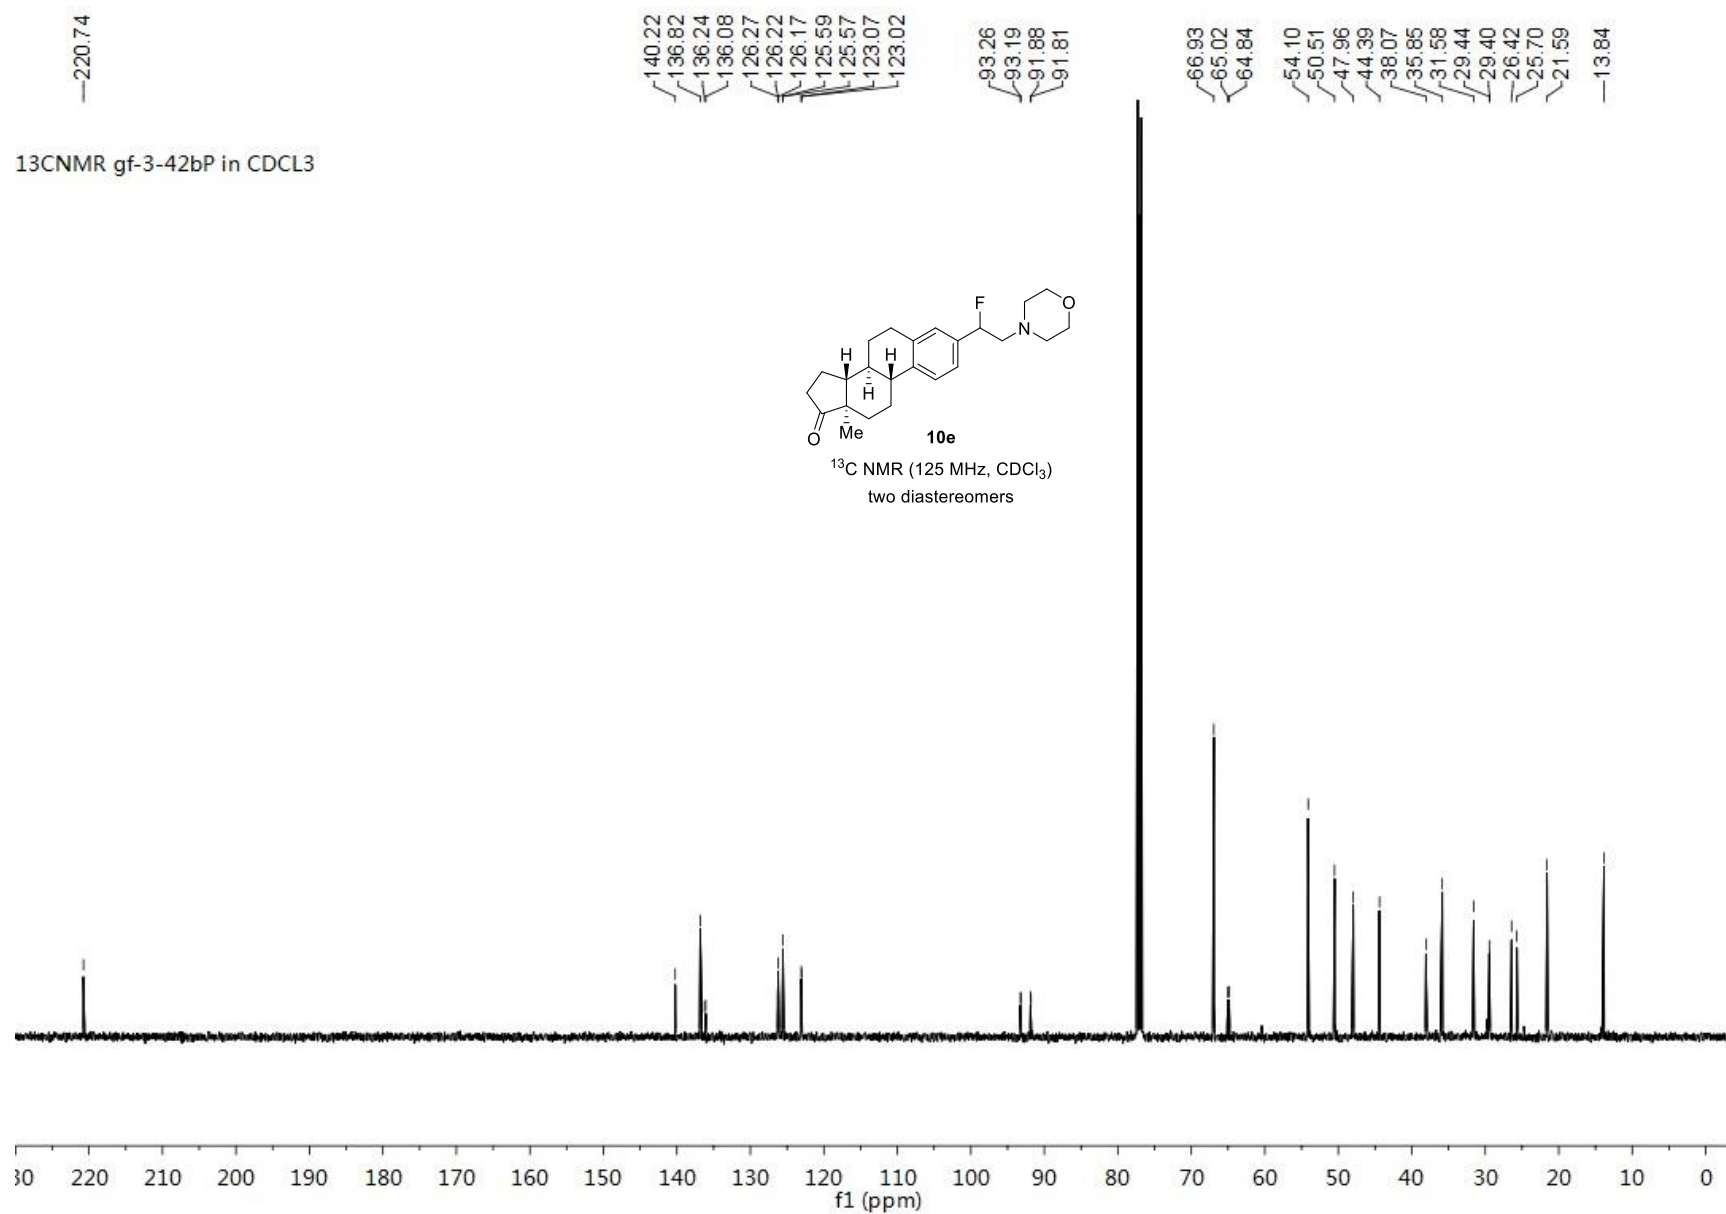

19FNMR gf-3-42bP in CDCl3

175.2623  
175.5331

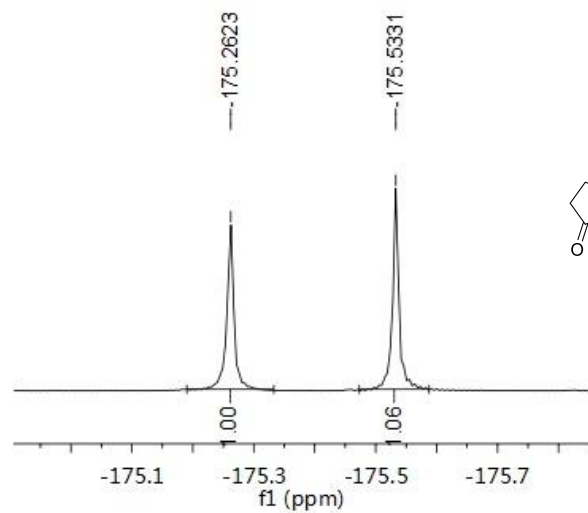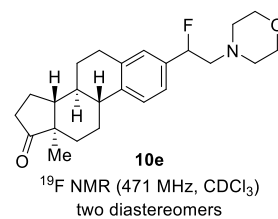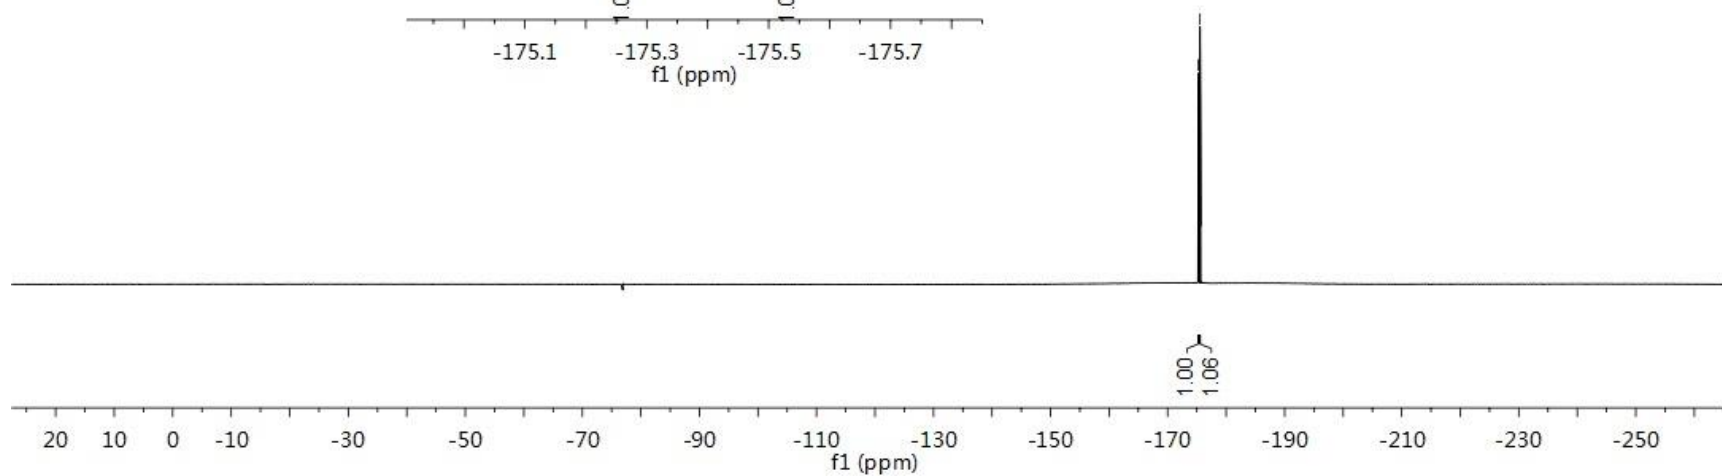



7.9827  
7.9661  
7.7812  
7.7647  
7.6198  
7.6153  
7.6026  
7.5869  
7.3515  
7.3362  
7.3209  
7.2690  
7.2598  
7.2549  
7.2407  
7.2249  
5.9090  
5.9047  
5.8921  
5.8876  
5.8121  
5.8077  
5.7952  
5.7907  
3.0928  
3.0755  
3.0647  
3.0589  
3.0476  
3.0417  
3.0308  
3.0136  
2.8073  
2.8022  
2.7793  
2.7743  
2.7431  
2.7380  
2.7151  
2.7101  
2.3998  
2.3475

<sup>1</sup>H NMR of gf-3-187bP in CDCl<sub>3</sub>

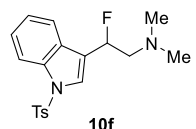

<sup>1</sup>H NMR (500 MHz, CDCl<sub>3</sub>)

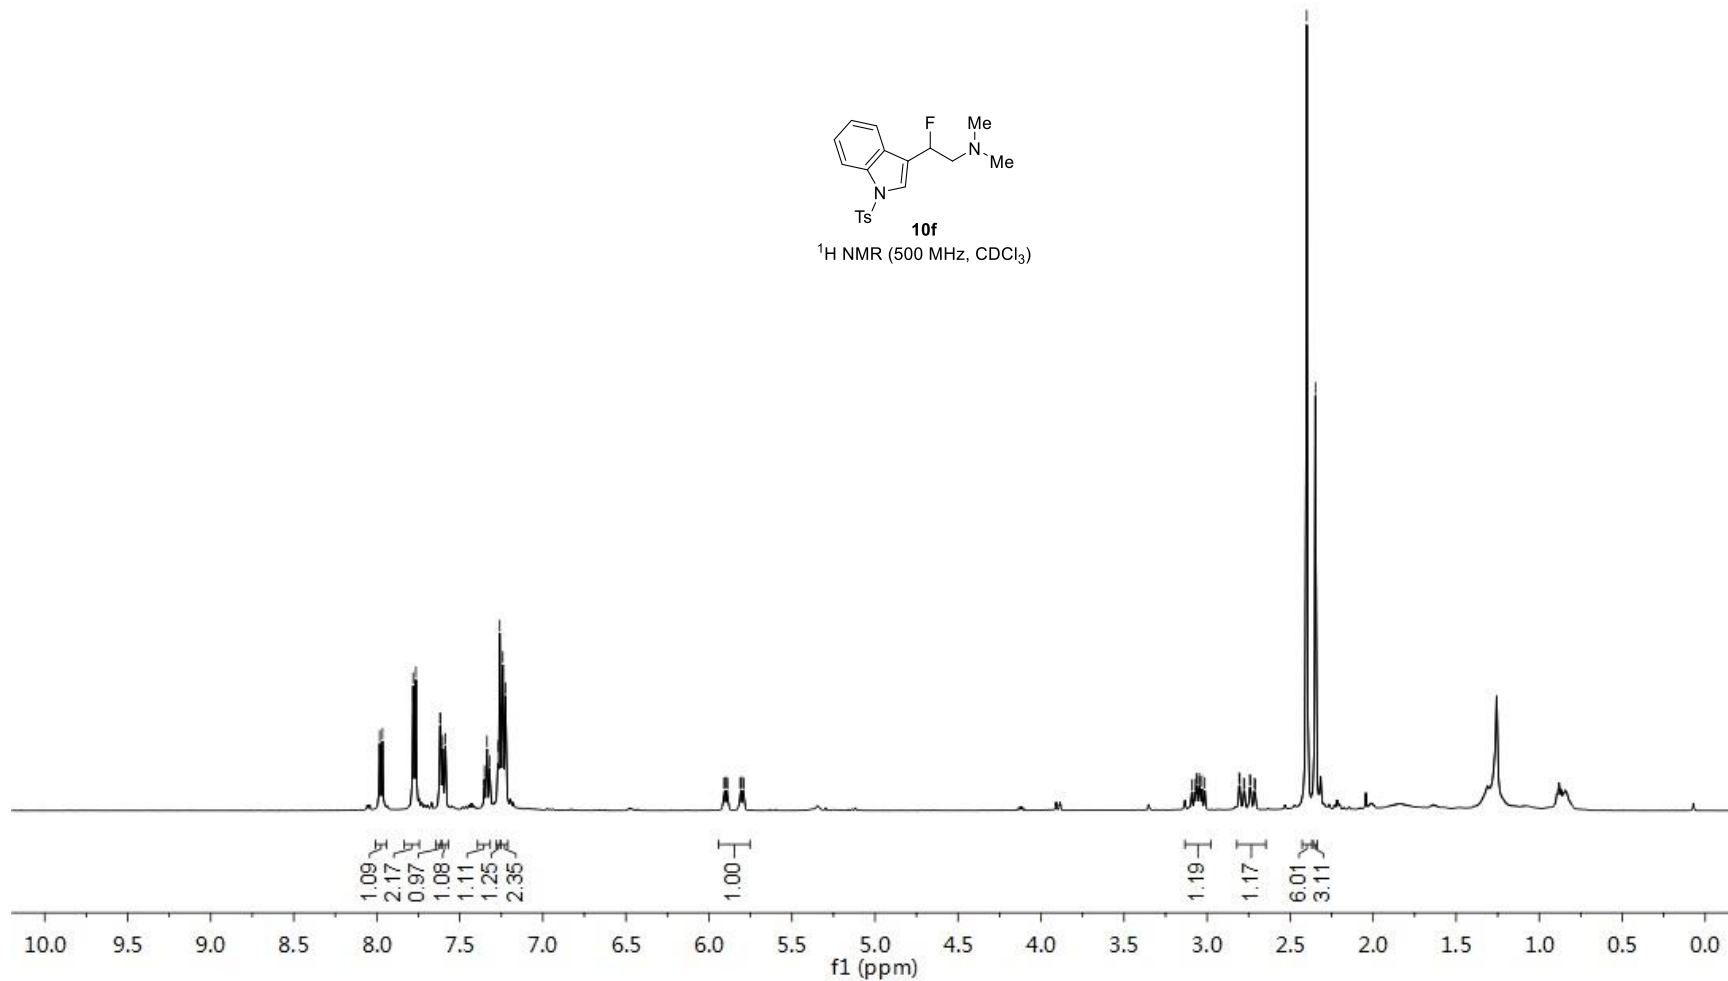

<sup>13</sup>CNMR gf-3-187bP in CDCl<sub>3</sub>

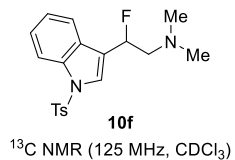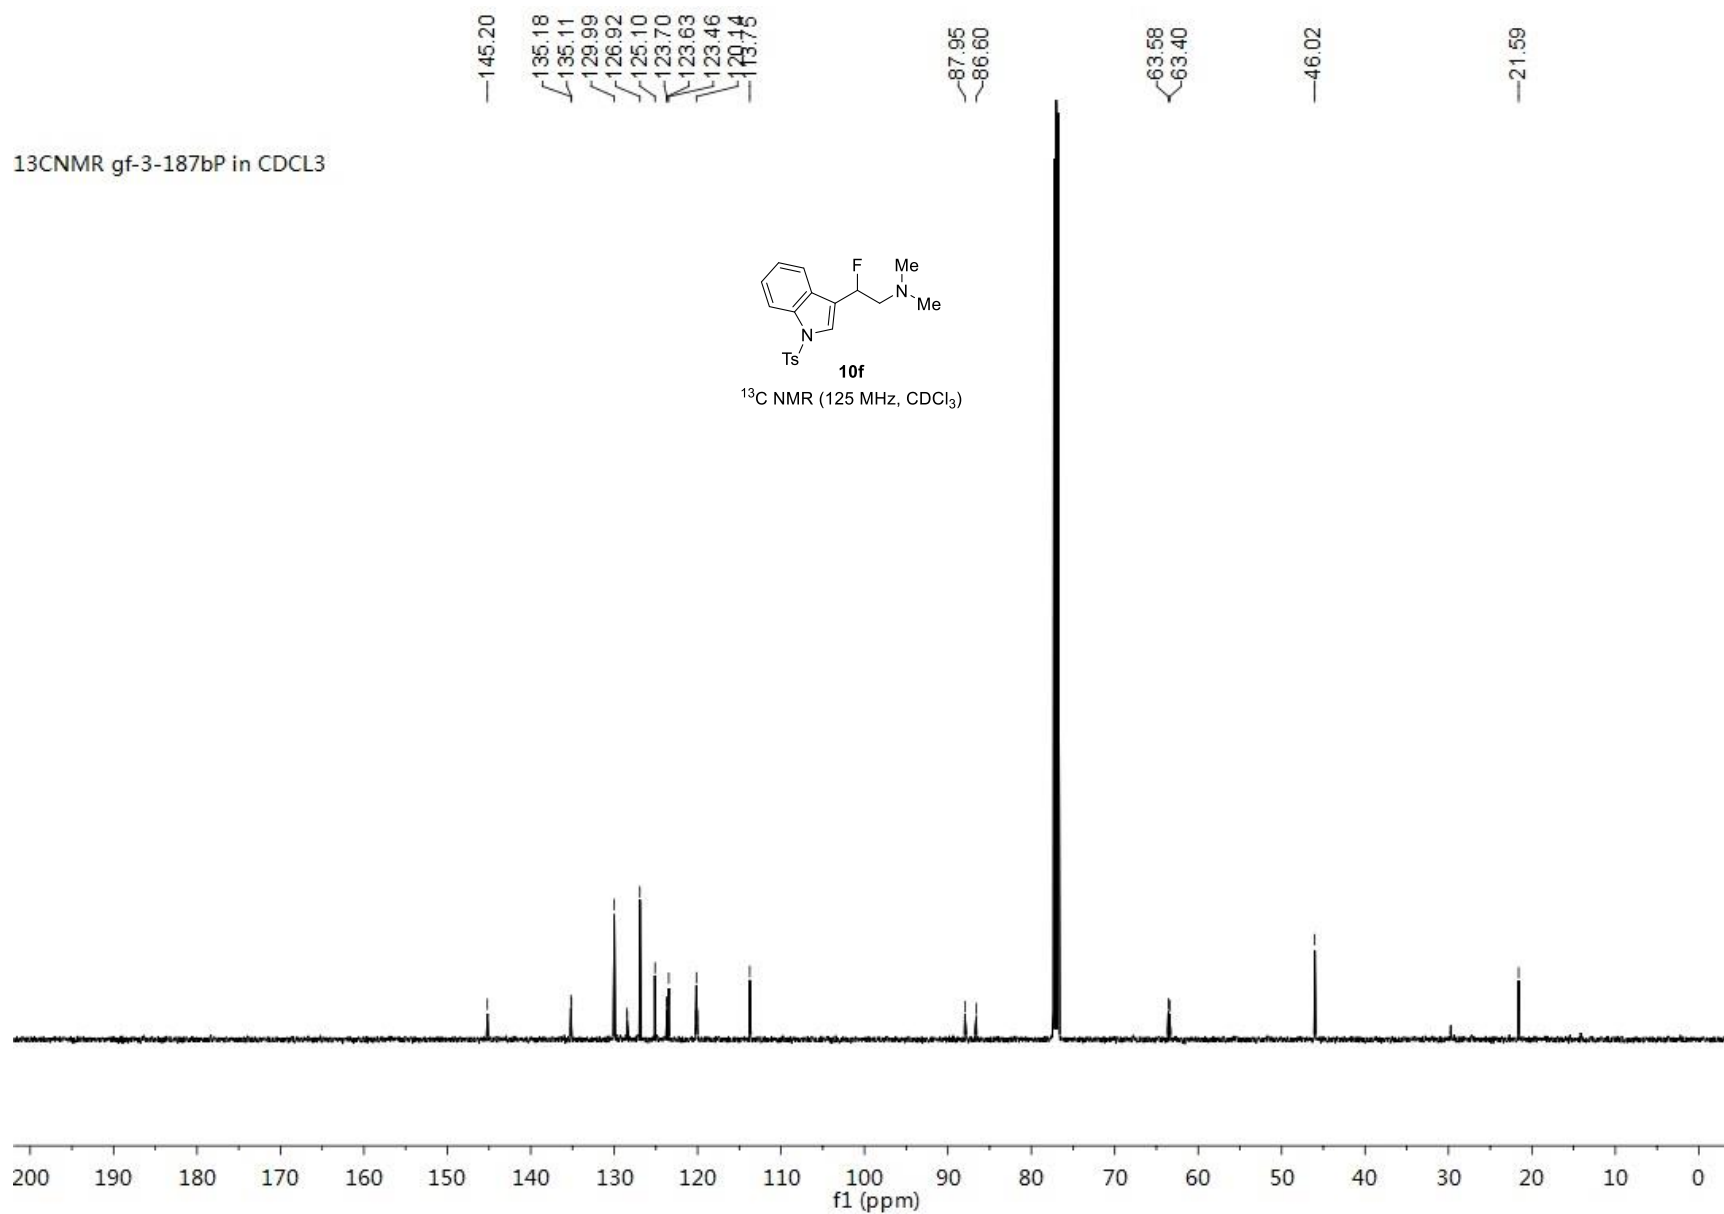

<sup>19</sup>F NMR gf-3-187bP in CDCl<sub>3</sub>

---176.8845

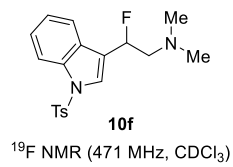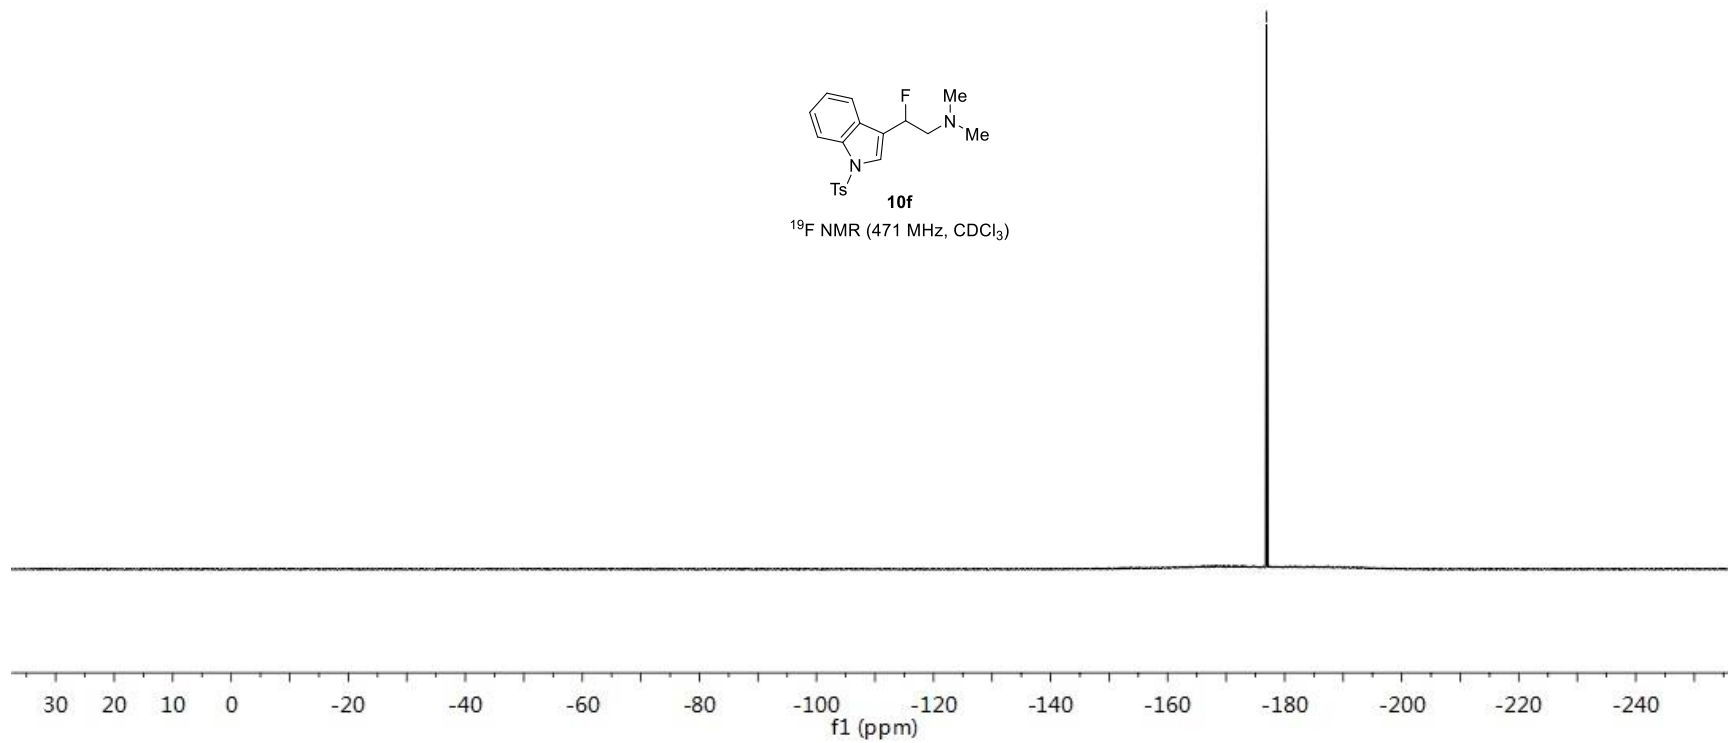

7.2983  
7.2828  
7.2671  
7.2601  
6.9047  
6.8885  
6.8842  
6.8745  
6.8589  
6.8587  
5.6743  
5.6614  
5.6570  
5.5809  
5.5765  
5.5636  
5.5592  
3.8149  
3.4746  
3.4650  
3.4560  
2.9189  
2.9015  
2.8838  
2.8664  
2.6042  
2.5991  
2.5878  
2.5760  
2.5657  
2.5555  
2.5482  
1.4604

<sup>1</sup>H NMR of gf-3-224aP2 in CDCl<sub>3</sub>

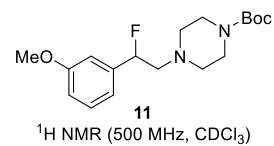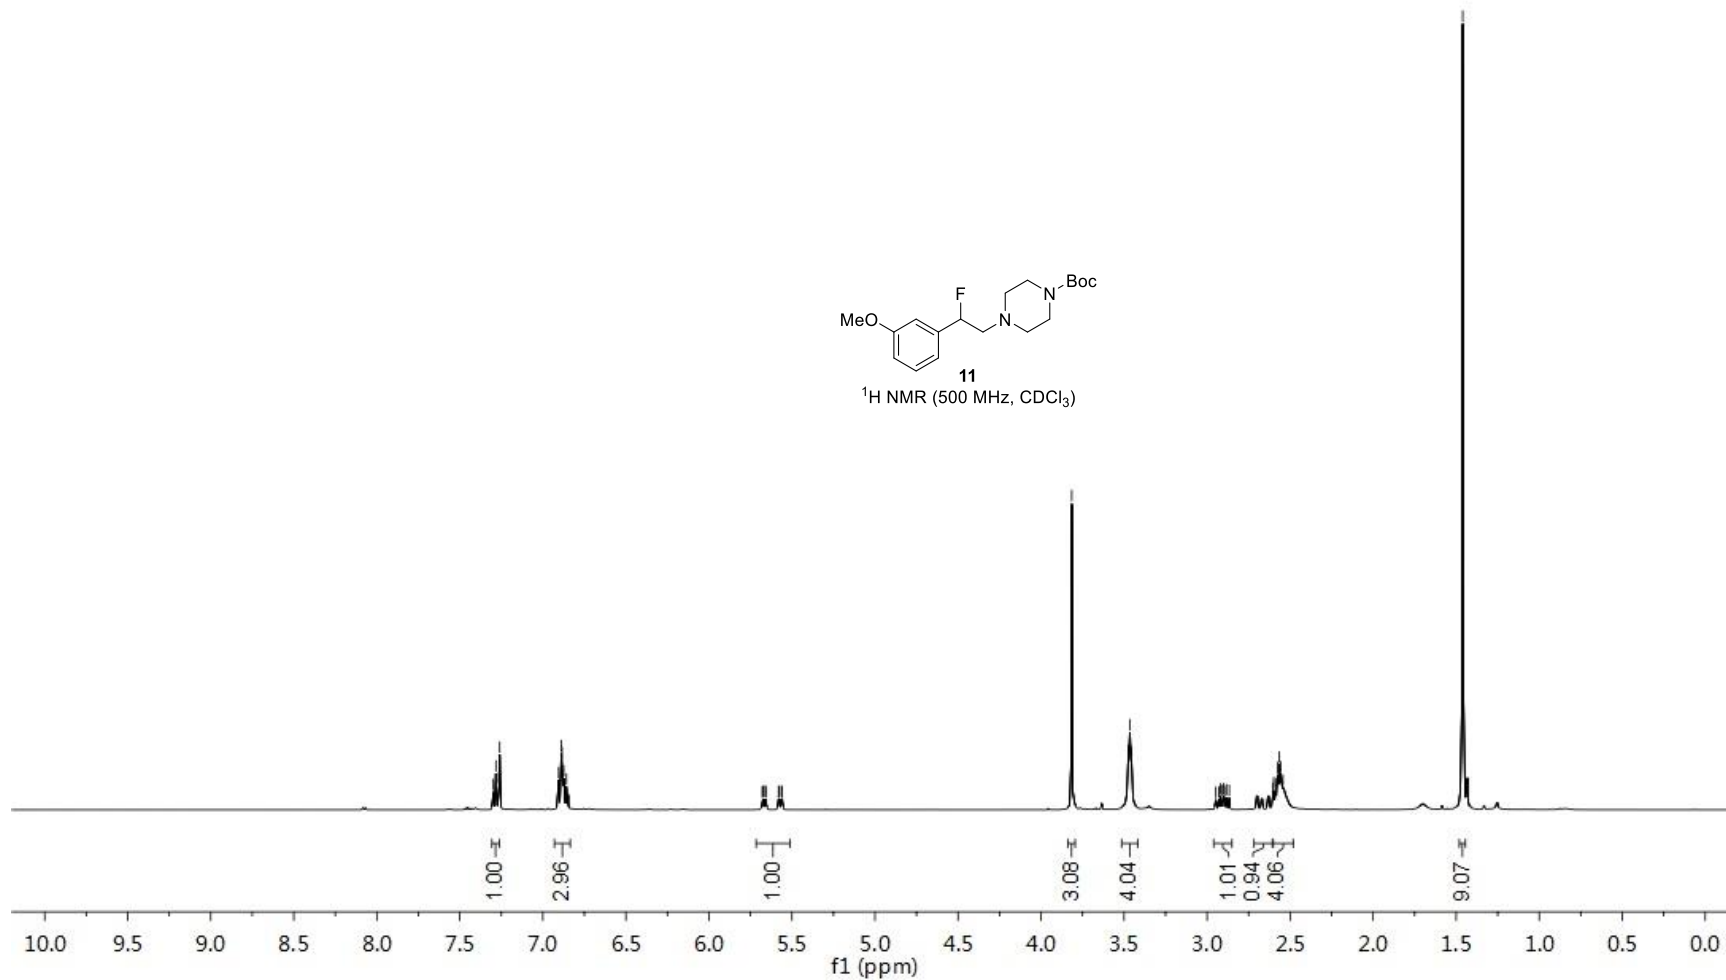

—159.74  
—154.74  
—140.42  
—140.26  
—129.62  
—117.75  
—117.70  
—113.90  
—111.12  
—111.06  
—93.30  
—91.91  
—79.68  
—64.68  
—64.50  
—55.29  
—53.43  
—28.44

$^{13}\text{C}$ NMR gf-3-224aP2 in  $\text{CDCl}_3$

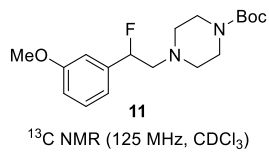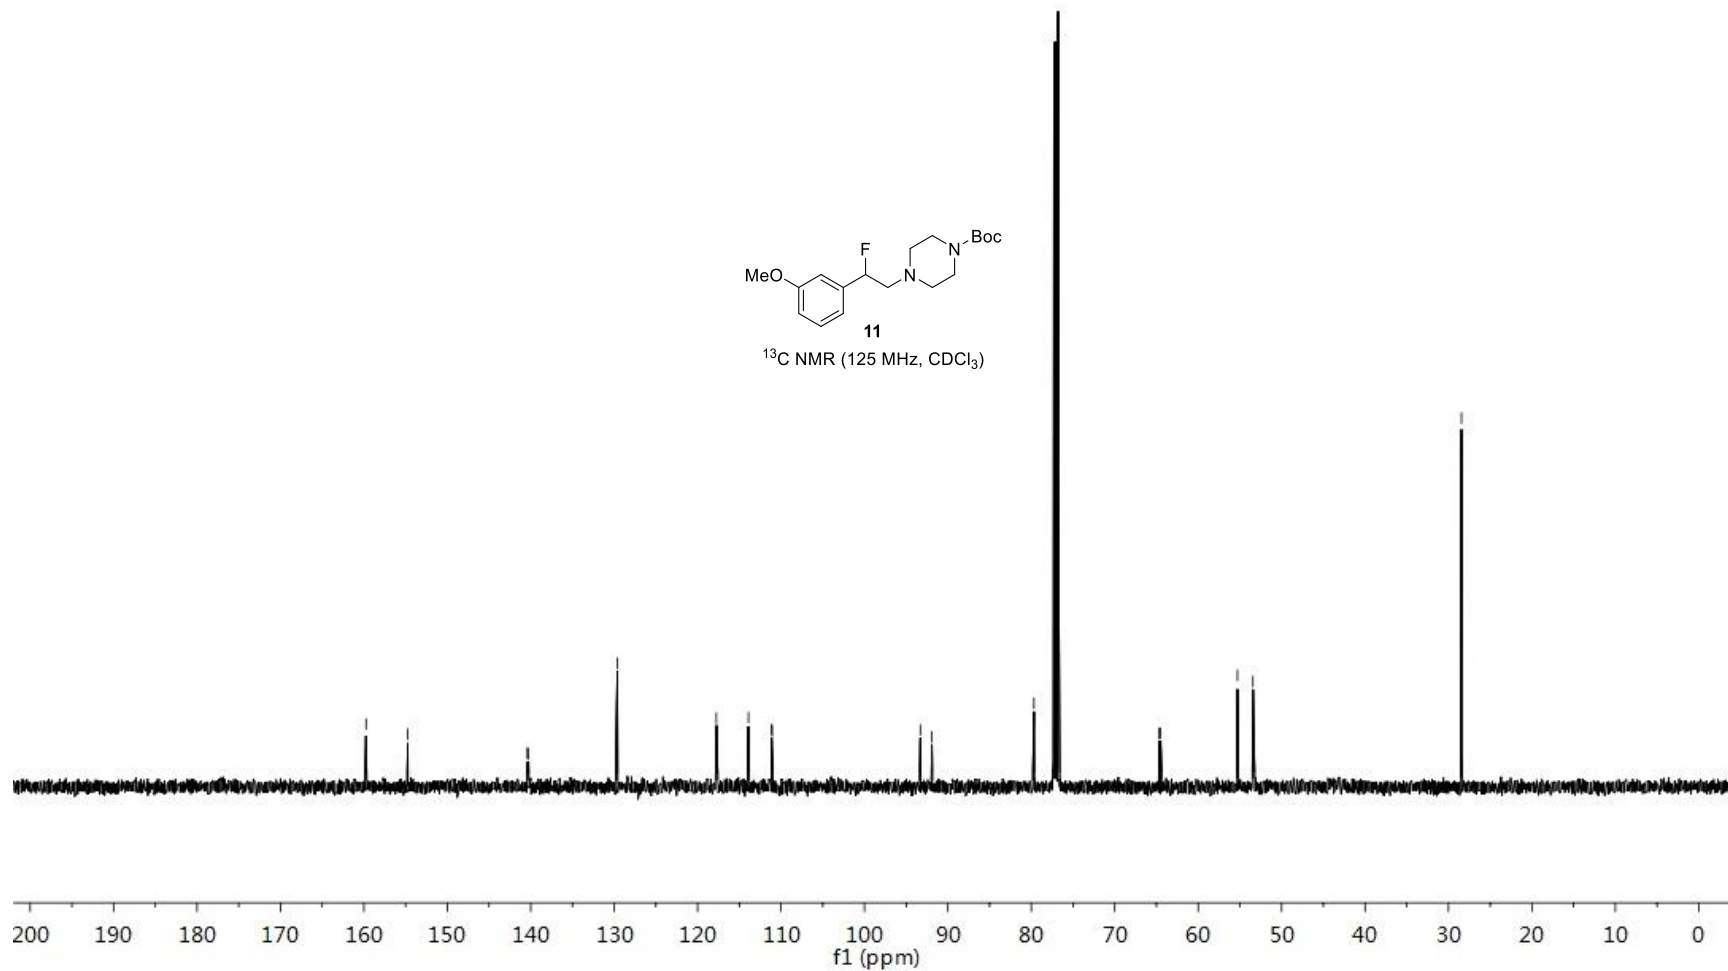

<sup>19</sup>F NMR gf-3-224aP2 in CDCl<sub>3</sub>

—177.0941

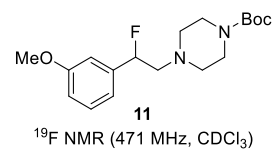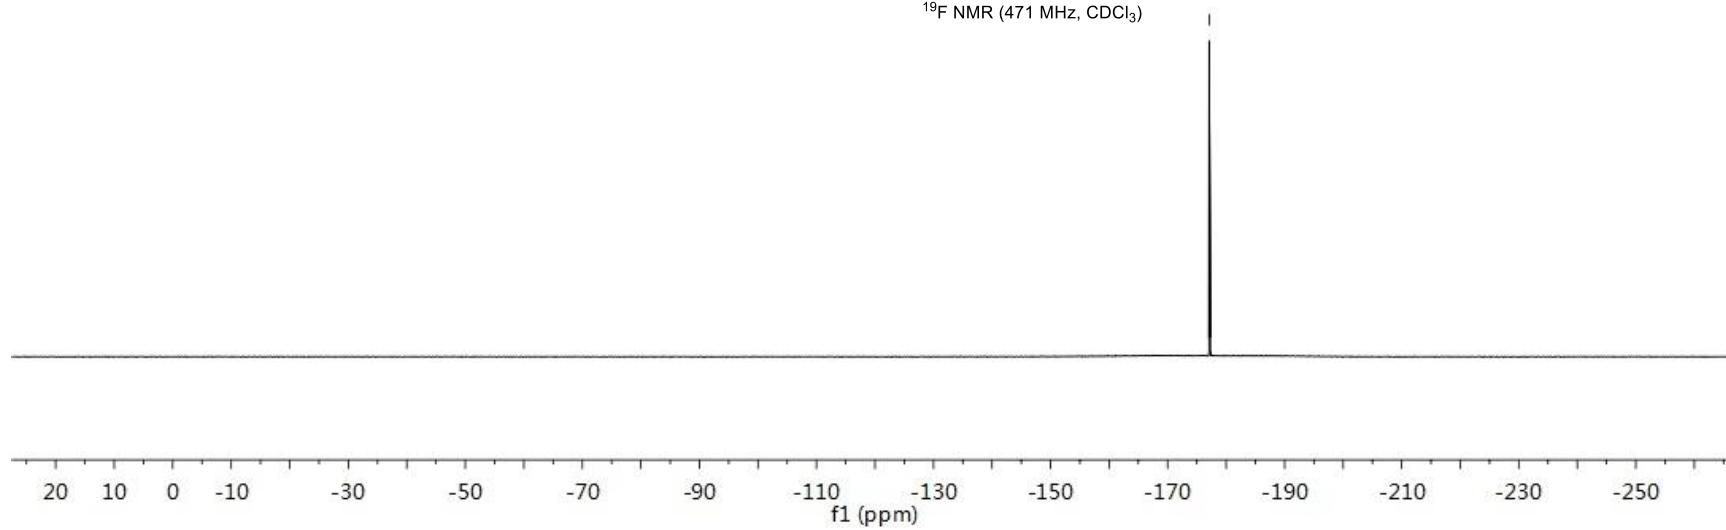

<sup>1</sup>H NMR gf-3-227cP in CDCl<sub>3</sub>

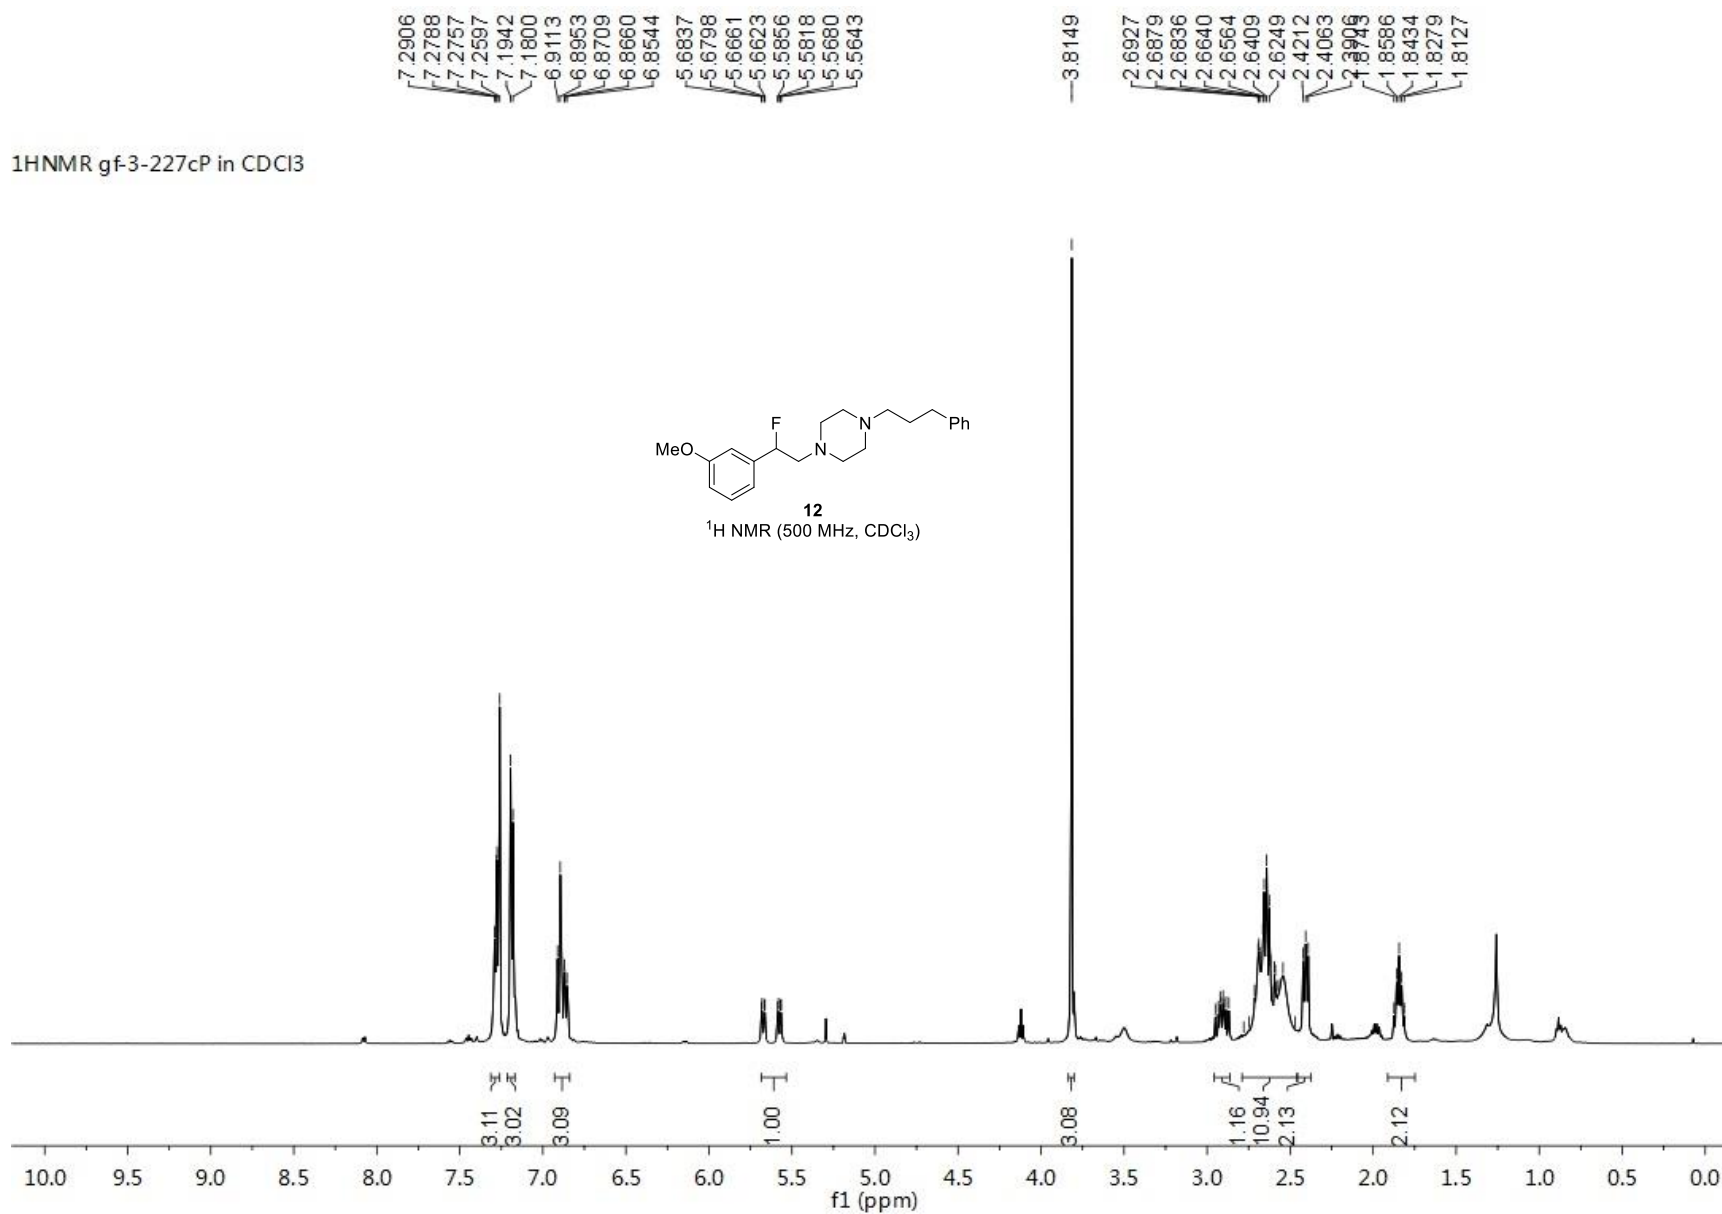

<sup>13</sup>CNMR gf-3-227cP in CDCl<sub>3</sub>

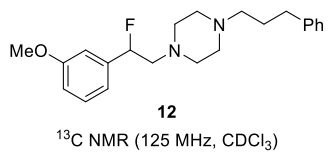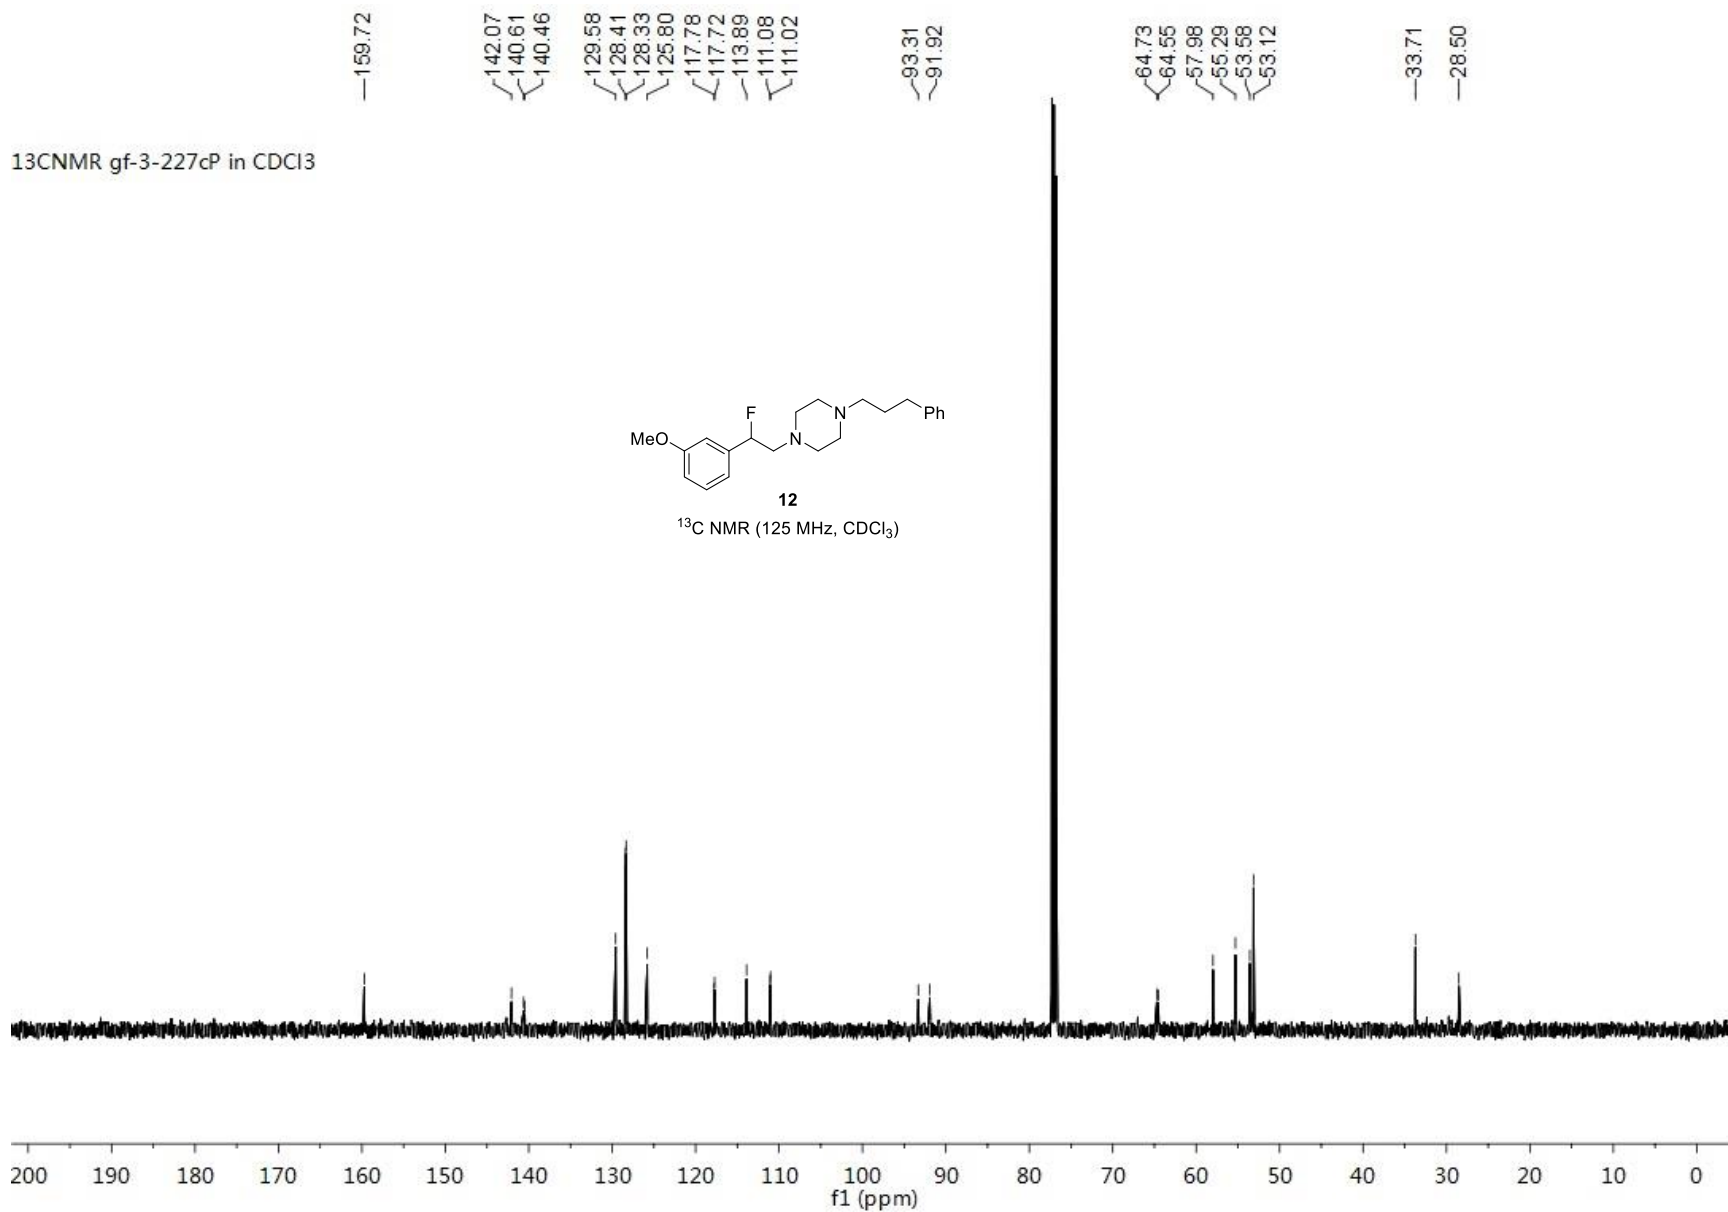



<sup>19</sup>F NMR gf-3-227cP in CDCl<sub>3</sub>

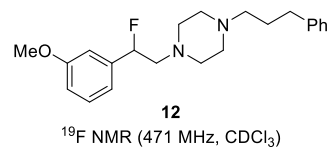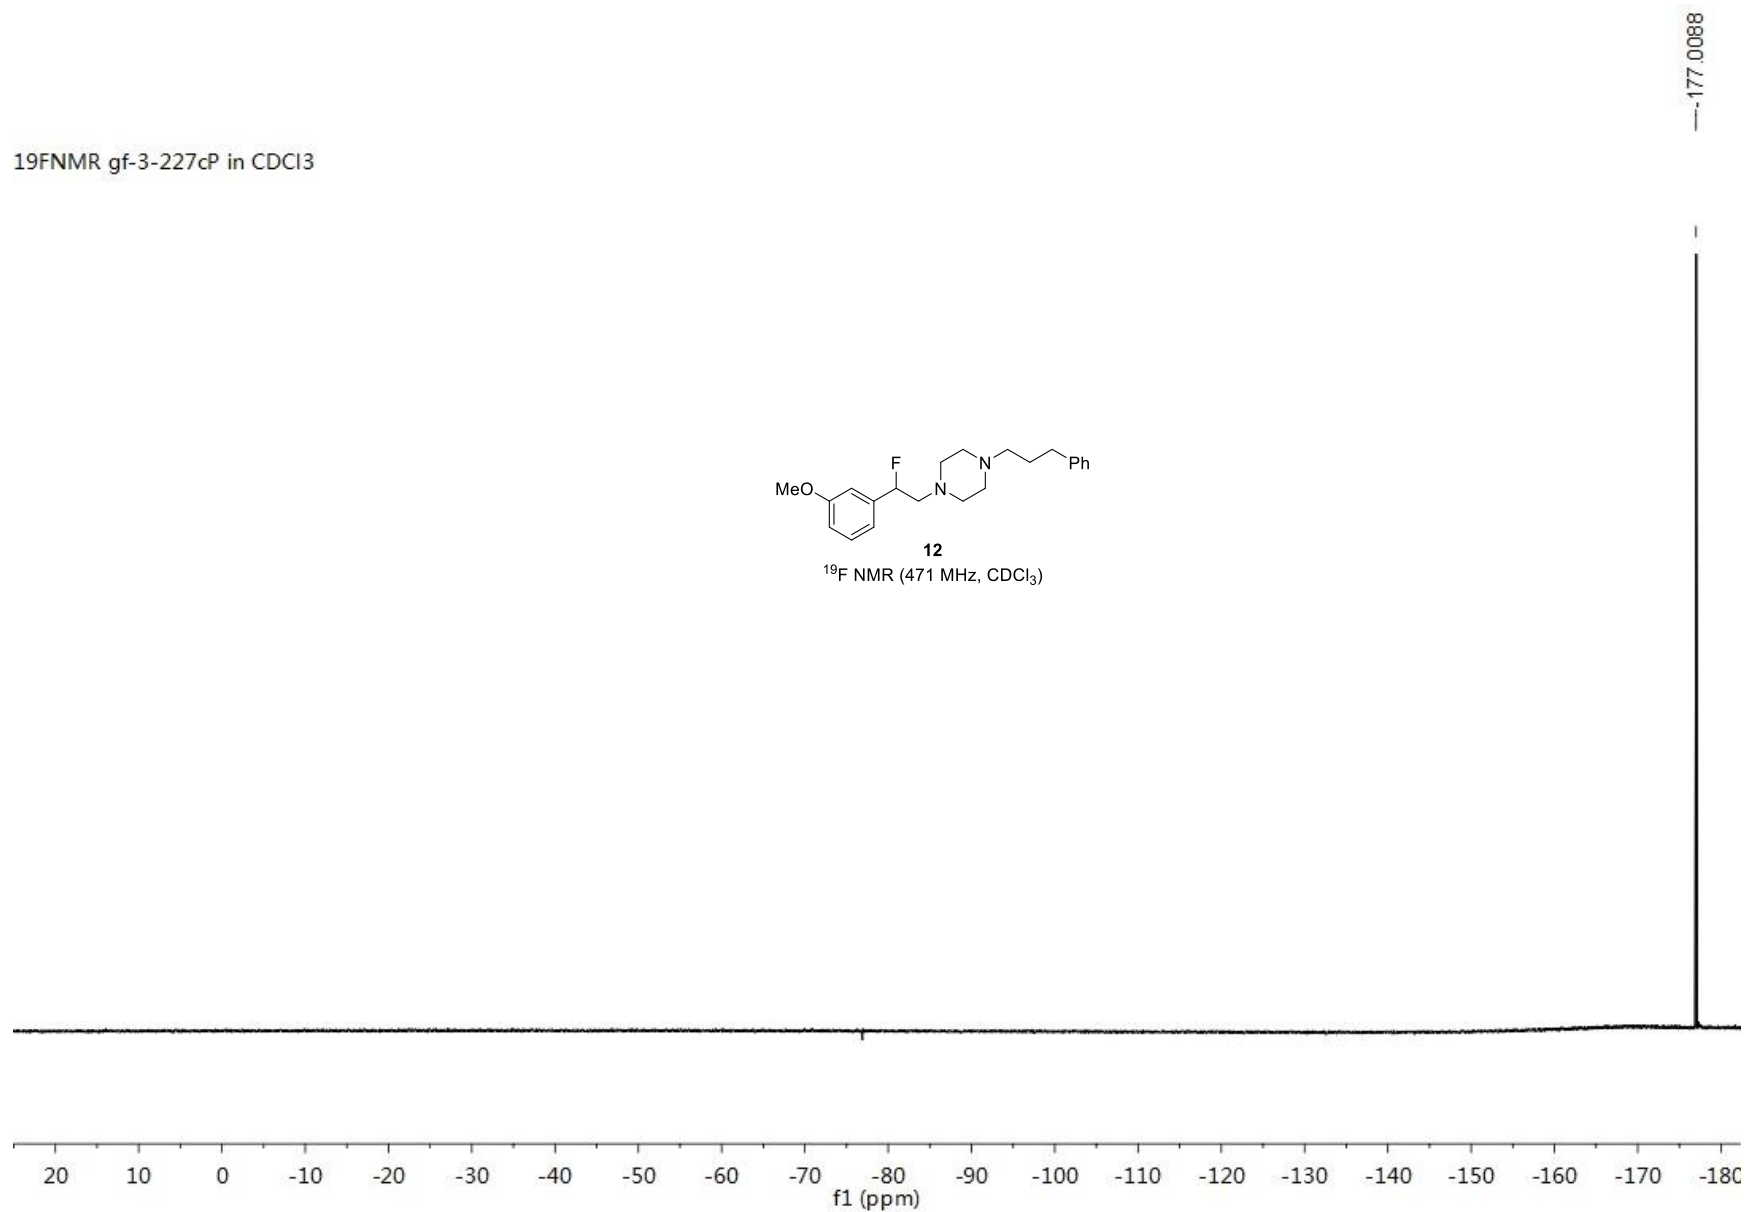

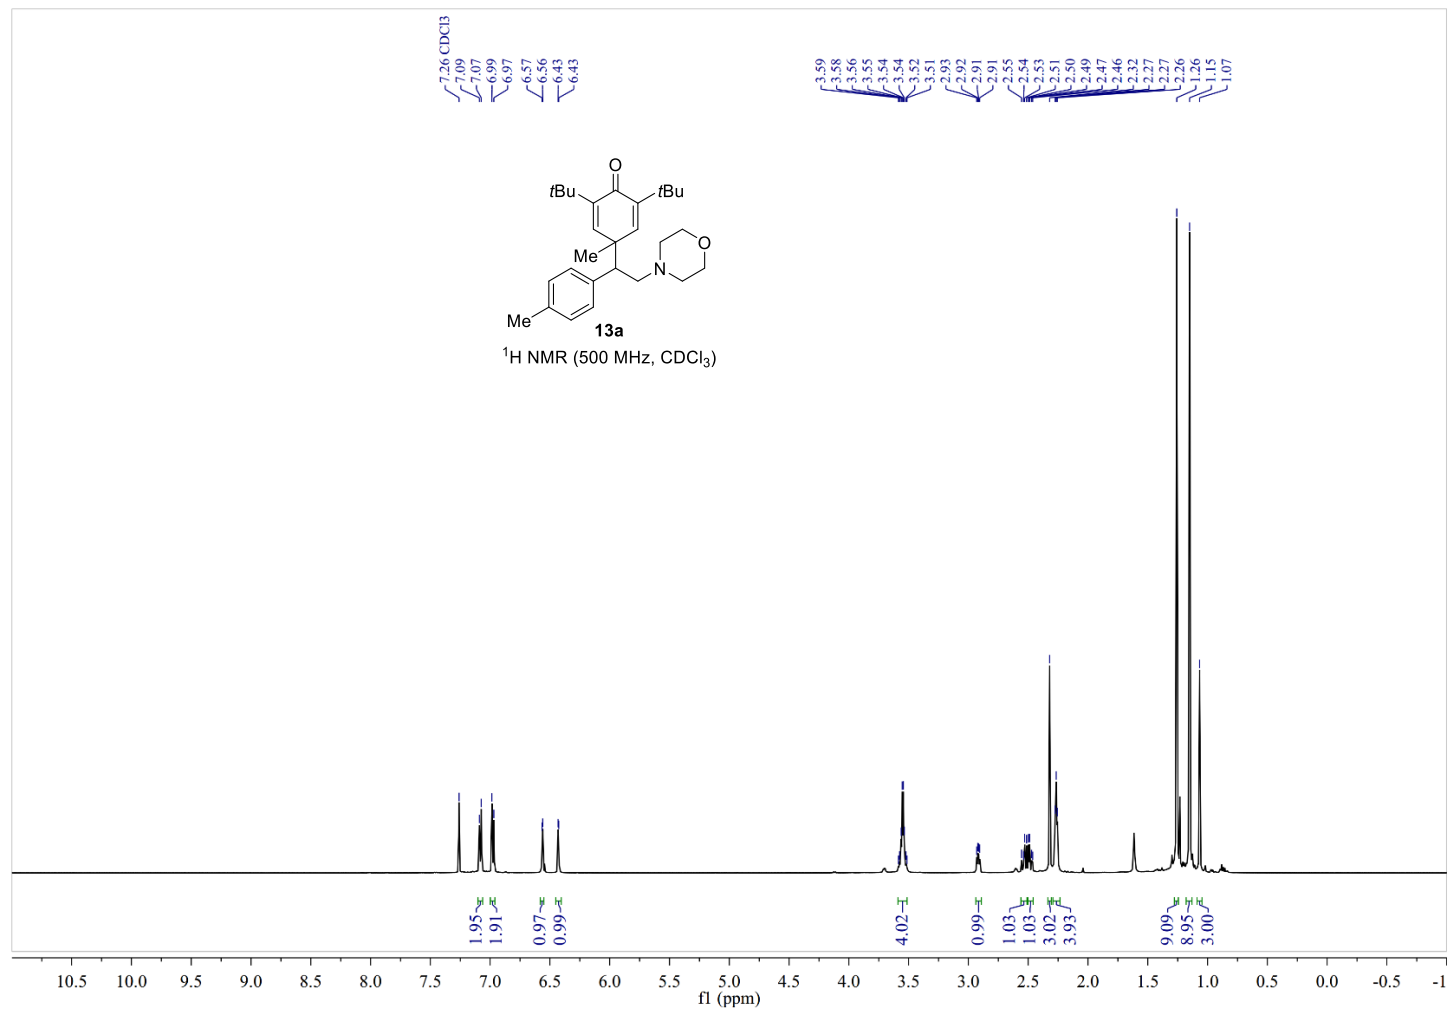

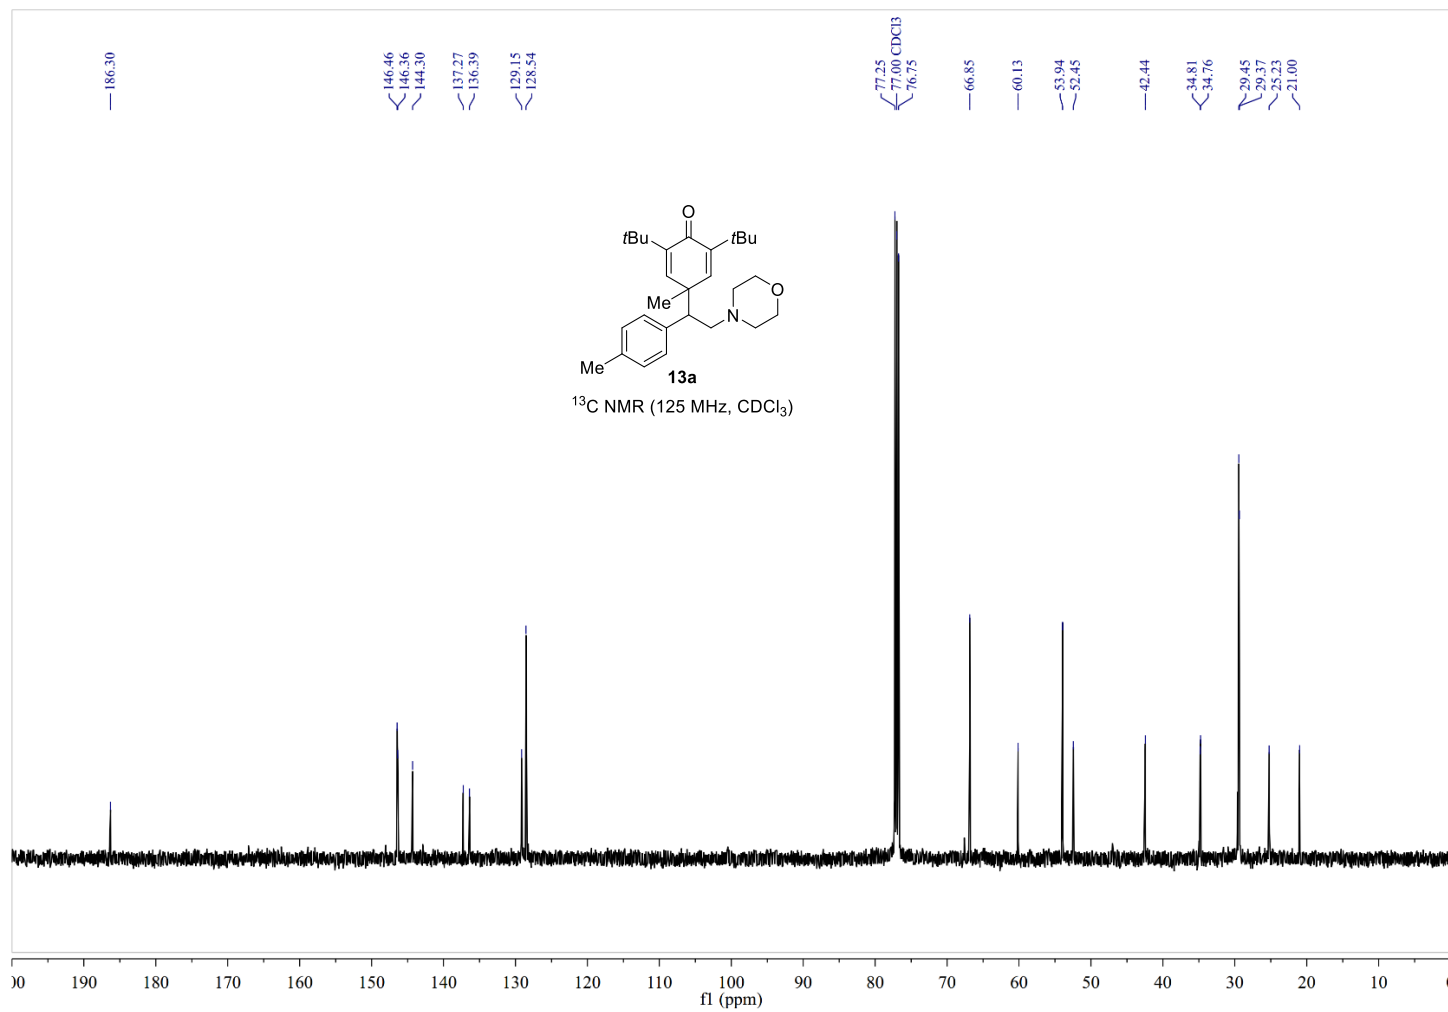

## 11. X-ray crystallography information

The major single diastereomer of compound **3v**•HCl was recrystallized twice in dichloromethane and hexanes. Then, a crystal of was slowly grown from dichloromethane, ethyl acetate and *n*-hexane, which is suitable for X-ray diffraction analysis. The chemical structure was showed as follows, CCDC number is 2210154. These data can be obtained free of charge from the Cambridge Crystallographic Data Centre *via* [www.ccdc.com.ac.uk/data\\_request/cif](http://www.ccdc.com.ac.uk/data_request/cif).

Crystal structure report for 22097 (**3v**•HCl–major single diastereomer)

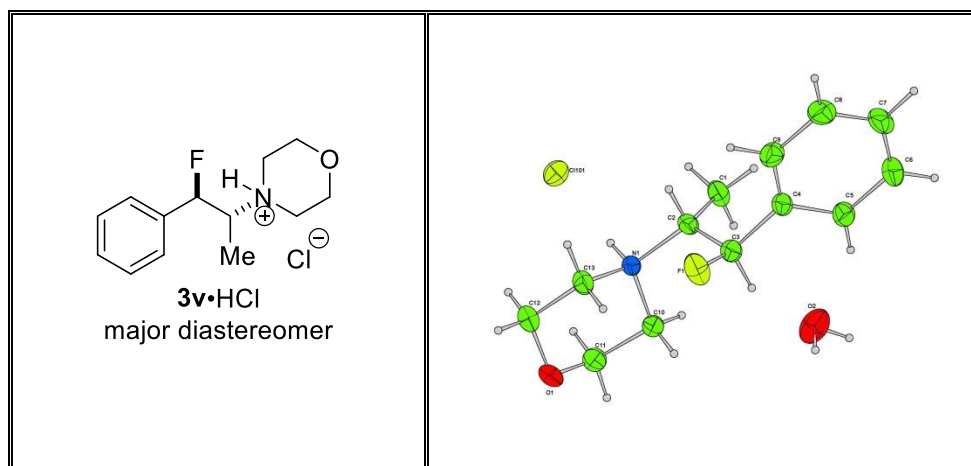

The sample was submitted by Guangshou Feng (research group of Wang, Department of Chemistry, Duke University). A colorless crystal (approximate dimensions 0.230 x 0.100 x 0.040 mm<sup>3</sup>) was placed onto the tip of MiTeGen and mounted on a Bruker D8 VENTURE diffractometer and measured at 150 K.

Table 1. Crystal data and structure refinement for 22097.

|                             |                                                                 |                  |
|-----------------------------|-----------------------------------------------------------------|------------------|
| Empirical formula           | C13 H20.50 Cl1 F1.00 N1 O1.75                                   |                  |
| Formula weight              | 273.26                                                          |                  |
| Crystal color, shape, size  | colorless block fragment, 0.230 x 0.100 x 0.040 mm <sup>3</sup> |                  |
| Temperature                 | 150 K                                                           |                  |
| Wavelength                  | 0.71073 Å                                                       |                  |
| Crystal system, space group | Monoclinic, C2/c                                                |                  |
| Unit cell dimensions        | a = 22.792(2) Å                                                 | a = 90°.         |
|                             | b = 11.6050(13) Å                                               | b = 111.875(3)°. |
|                             | c = 23.759(3) Å                                                 | g = 90°.         |
| Volume                      | 5831.8(10) Å <sup>3</sup>                                       |                  |
| Z                           | 16                                                              |                  |
| Density (calculated)        | 1.245 Mg/m <sup>3</sup>                                         |                  |
| Absorption coefficient      | 0.266 mm <sup>-1</sup>                                          |                  |
| F(000)                      | 2328                                                            |                  |

|                                   |                                                                                                                                                         |
|-----------------------------------|---------------------------------------------------------------------------------------------------------------------------------------------------------|
| Data collection                   |                                                                                                                                                         |
| Diffractometer                    | Bruker D8 VENTURE, Bruker                                                                                                                               |
| Theta range for data collection   | 2.002 to 25.697°                                                                                                                                        |
| Index ranges                      | -27<=h<=26, -14<=k<=14, -28<=l<=28                                                                                                                      |
| Reflections collected             | 84262                                                                                                                                                   |
| Independent reflections           | 5542 [R(int) = 0.192]                                                                                                                                   |
| Observed Reflections              | 3473                                                                                                                                                    |
| Completeness to theta = 25.697°   | 99.7 %                                                                                                                                                  |
| Solution and Refinement           |                                                                                                                                                         |
| Absorption correction             | Semi-empirical from equivalents                                                                                                                         |
| Max. and min. transmission        | 0.99 and 0.97                                                                                                                                           |
| Solution                          | Intrinsic phasing methods                                                                                                                               |
| Refinement method                 | Full-matrix least-squares on F <sup>2</sup>                                                                                                             |
| Weighting scheme                  | w = [s <sup>2</sup> Fo <sup>2</sup> + AP <sup>2</sup> + BP] <sup>-1</sup> , with<br>P = (Fo <sup>2</sup> + 2 Fc <sup>2</sup> )/3, A = 0.115, B = 12.240 |
| Data / restraints / parameters    | 5542 / 183 / 414                                                                                                                                        |
| Goodness-of-fit on F <sup>2</sup> | 0.9871                                                                                                                                                  |
| Final R indices [I>2sigma(I)]     | R1 = 0.0752, wR2 = 0.2076                                                                                                                               |
| R indices (all data)              | R1 = 0.1109, wR2 = 0.2320                                                                                                                               |
| Largest diff. peak and hole       | 1.21 and -1.20 e.Å <sup>-3</sup>                                                                                                                        |

Table 2. Atomic coordinates ( x 10<sup>4</sup>) and equivalent isotropic displacement parameters (Å<sup>2</sup>x 10<sup>3</sup>) for 22097. U(eq) is defined as one third of the trace of the orthogonalized U<sup>ij</sup> tensor.

|       | x       | y       | z       | U(eq) |
|-------|---------|---------|---------|-------|
| Cl1   | 2371(1) | 4325(1) | 4342(1) | 57    |
| Cl101 | 4124(1) | 8189(1) | 2817(1) | 66    |
| F1    | 4143(2) | 4872(2) | 4548(1) | 86    |
| F101  | 4538(4) | 4343(5) | 5999(5) | 42    |
| F201  | 4444(2) | 4427(4) | 5808(3) | 47    |
| O1    | 3365(2) | 8662(3) | 4296(2) | 93    |
| O2    | 2054(2) | 4746(5) | 2935(2) | 105   |
| O101  | 4450(2) | 796(3)  | 5456(2) | 70    |
| O102  | 5000    | 3638(5) | 7500    | 88    |
| N1    | 3723(1) | 6803(3) | 3708(1) | 46    |
| N101  | 3685(1) | 2456(2) | 5755(1) | 42    |
| C1    | 3526(2) | 5372(3) | 2882(2) | 65    |
| C2    | 3818(1) | 5581(2) | 3535(1) | 54    |
| C3    | 3752(1) | 4666(2) | 3935(1) | 57    |
| C4    | 3936(1) | 3478(2) | 3791(2) | 56    |

|      |         |          |         |    |
|------|---------|----------|---------|----|
| C5   | 3415(2) | 2767(3)  | 3456(2) | 64 |
| C6   | 3534(2) | 1683(3)  | 3270(2) | 76 |
| C7   | 4140(2) | 1340(3)  | 3400(2) | 83 |
| C8   | 4632(2) | 2034(4)  | 3720(3) | 88 |
| C9   | 4520(2) | 3120(3)  | 3910(2) | 71 |
| C10  | 3044(2) | 7002(4)  | 3639(2) | 62 |
| C11  | 2956(3) | 8271(4)  | 3722(3) | 82 |
| C12  | 4006(3) | 8519(5)  | 4355(3) | 79 |
| C13  | 4153(2) | 7268(4)  | 4305(2) | 63 |
| C101 | 2871(4) | 3805(4)  | 5812(5) | 73 |
| C102 | 3530(1) | 3640(2)  | 5925(2) | 60 |
| C103 | 3877(2) | 4598(4)  | 5814(2) | 42 |
| C104 | 3843(2) | 5707(2)  | 6155(1) | 52 |
| C105 | 3445(8) | 6608(9)  | 5760(3) | 53 |
| C106 | 3443(8) | 7690(8)  | 5995(4) | 55 |
| C107 | 3745(7) | 7871(8)  | 6589(4) | 53 |
| C108 | 4118(8) | 7010(10) | 6961(4) | 54 |
| C109 | 4169(9) | 5924(9)  | 6714(4) | 49 |
| C110 | 3744(2) | 2416(4)  | 5151(2) | 52 |
| C111 | 3885(3) | 1218(4)  | 5006(2) | 67 |
| C112 | 4362(2) | 729(4)   | 6017(2) | 64 |
| C113 | 4247(2) | 1899(4)  | 6224(2) | 50 |
| C201 | 3058(3) | 3632(4)  | 6200(3) | 48 |
| C203 | 4047(1) | 4444(3)  | 6157(1) | 48 |
| C205 | 3520(5) | 6320(5)  | 5672(2) | 60 |
| C206 | 3367(5) | 7469(6)  | 5736(3) | 68 |
| C207 | 3572(4) | 7969(5)  | 6305(3) | 62 |
| C208 | 3923(5) | 7369(6)  | 6799(3) | 65 |
| C209 | 4060(6) | 6220(5)  | 6742(2) | 58 |

---

Table 3. Bond lengths [Å] and angles [°] for 22097.

|            |           |            |           |
|------------|-----------|------------|-----------|
| H1-N1      | 0.884(19) | H2-N101    | 0.883(19) |
| H3-O2      | 0.83(2)   | H4-O2      | 0.83(2)   |
| H5-O102    | 0.841(14) | F1-C3      | 1.417(4)  |
| F101-C103  | 1.436(9)  | F201-C203  | 1.438(6)  |
| O1-C11     | 1.410(7)  | O1-C12     | 1.424(6)  |
| O101-C111  | 1.420(6)  | O101-C112  | 1.423(6)  |
| N1-C2      | 1.515(4)  | N1-C10     | 1.512(5)  |
| N1-C13     | 1.493(5)  | N101-C102  | 1.511(4)  |
| N101-C110  | 1.492(5)  | N101-C113  | 1.496(5)  |
| C1-C2      | 1.461(5)  | C1-H11     | 0.950     |
| C1-H12     | 0.950     | C1-H13     | 0.950     |
| C2-C3      | 1.470(4)  | C2-H21     | 0.950     |
| C3-C4      | 1.517(3)  | C3-H31     | 0.950     |
| C4-C5      | 1.421(4)  | C4-C9      | 1.320(4)  |
| C5-C6      | 1.393(5)  | C5-H51     | 0.950     |
| C6-C7      | 1.359(5)  | C6-H61     | 0.950     |
| C7-C8      | 1.360(5)  | C7-H71     | 0.950     |
| C8-C9      | 1.396(5)  | C8-H81     | 0.950     |
| C9-H91     | 0.950     | C10-C11    | 1.509(7)  |
| C10-H101   | 0.950     | C10-H102   | 0.950     |
| C11-H111   | 0.950     | C11-H112   | 0.950     |
| C12-C13    | 1.505(7)  | C12-H121   | 0.950     |
| C12-H122   | 0.950     | C13-H131   | 0.950     |
| C13-H132   | 0.950     | C101-C102  | 1.437(9)  |
| C101-H1011 | 0.950     | C101-H1012 | 0.950     |
| C101-H1013 | 0.950     | C102-C103  | 1.443(5)  |
| C102-H1021 | 0.950     | C102-C201  | 1.452(5)  |
| C102-C203  | 1.441(4)  | C102-H1022 | 0.950     |
| C103-C104  | 1.537(4)  | C103-C104  | 1.537(4)  |
| C103-H1032 | 0.950     | C104-C105  | 1.471(7)  |
| C104-C109  | 1.282(7)  | C104-C203  | 1.537(4)  |
| C104-C205  | 1.316(6)  | C104-C209  | 1.427(6)  |
| C105-C106  | 1.375(7)  | C105-H1051 | 0.950     |
| C106-C107  | 1.336(8)  | C106-H1061 | 0.950     |
| C107-C108  | 1.395(8)  | C107-H1071 | 0.950     |
| C108-C109  | 1.414(7)  | C108-H1081 | 0.950     |
| C109-H1091 | 0.950     | C110-C111  | 1.496(6)  |
| C110-H1101 | 0.950     | C110-H1102 | 0.950     |
| C111-H1111 | 0.950     | C111-H1112 | 0.950     |
| C112-C113  | 1.499(6)  | C112-H1121 | 0.950     |
| C112-H1122 | 0.950     | C113-H1131 | 0.950     |

|            |       |            |          |
|------------|-------|------------|----------|
| C113-H1132 | 0.950 | C201-H2011 | 0.950    |
| C201-H2012 | 0.950 | C201-H2013 | 0.950    |
| C203-H2031 | 0.950 | C205-C206  | 1.401(6) |
| C205-H2051 | 0.950 | C206-C207  | 1.381(6) |
| C206-H2061 | 0.950 | C207-C208  | 1.342(6) |
| C207-H2071 | 0.950 | C208-C209  | 1.387(6) |
| C208-H2081 | 0.950 | C209-H2091 | 0.950    |

|                |            |                |            |
|----------------|------------|----------------|------------|
| C11-O1-C12     | 110.0(4)   | H4-O2-H3       | 97(8)      |
| C111-O101-C112 | 108.6(3)   | H5-O102-H5#1   | 114(11)    |
| H1-N1-C2       | 105.1(15)  | H1-N1-C10      | 105.5(15)  |
| C2-N1-C10      | 111.0(3)   | H1-N1-C13      | 105.8(15)  |
| C2-N1-C13      | 119.1(3)   | C10-N1-C13     | 109.3(3)   |
| H2-N101-C102   | 106.4(15)  | H2-N101-C110   | 106.5(15)  |
| C102-N101-C110 | 113.5(3)   | H2-N101-C113   | 105.1(15)  |
| C102-N101-C113 | 114.5(3)   | C110-N101-C113 | 110.1(3)   |
| C2-C1-H11      | 109.2      | C2-C1-H12      | 109.9      |
| H11-C1-H12     | 109.5      | C2-C1-H13      | 109.3      |
| H11-C1-H13     | 109.5      | H12-C1-H13     | 109.5      |
| N1-C2-C1       | 112.83(10) | N1-C2-C3       | 116.15(9)  |
| C1-C2-C3       | 116.76(10) | N1-C2-H21      | 102.9      |
| C1-C2-H21      | 102.9      | C3-C2-H21      | 102.5      |
| C2-C3-F1       | 111.47(10) | C2-C3-C4       | 114.01(10) |
| F1-C3-C4       | 105.31(10) | C2-C3-H31      | 108.3      |
| F1-C3-H31      | 108.8      | C4-C3-H31      | 108.8      |
| C3-C4-C5       | 114.23(8)  | C3-C4-C9       | 125.34(8)  |
| C5-C4-C9       | 120.21(8)  | C4-C5-C6       | 118.78(9)  |
| C4-C5-H51      | 119.8      | C6-C5-H51      | 121.4      |
| C5-C6-C7       | 119.60(9)  | C5-C6-H61      | 119.9      |
| C7-C6-H61      | 120.5      | C6-C7-C8       | 120.75(9)  |
| C6-C7-H71      | 119.8      | C8-C7-H71      | 119.4      |
| C7-C8-C9       | 120.17(9)  | C7-C8-H81      | 119.9      |
| C9-C8-H81      | 119.8      | C8-C9-C4       | 120.48(9)  |
| C8-C9-H91      | 119.8      | C4-C9-H91      | 119.7      |
| N1-C10-C11     | 108.4(4)   | N1-C10-H101    | 109.6      |
| C11-C10-H101   | 109.1      | N1-C10-H102    | 109.8      |
| C11-C10-H102   | 110.5      | H101-C10-H102  | 109.5      |
| C10-C11-O1     | 111.6(5)   | C10-C11-H111   | 108.3      |
| O1-C11-H111    | 107.8      | C10-C11-H112   | 110.1      |
| O1-C11-H112    | 109.5      | H111-C11-H112  | 109.5      |
| O1-C12-C13     | 110.8(4)   | O1-C12-H121    | 108.7      |



|                  |            |                  |            |
|------------------|------------|------------------|------------|
| C13-C12-H121     | 109.5      | O1-C12-H122      | 109.1      |
| C13-C12-H122     | 109.3      | H121-C12-H122    | 109.5      |
| C12-C13-N1       | 109.6(4)   | C12-C13-H131     | 109.7      |
| N1-C13-H131      | 109.5      | C12-C13-H132     | 109.5      |
| N1-C13-H132      | 108.9      | H131-C13-H132    | 109.5      |
| H1011-C101-H1012 | 109.5      | H1011-C101-H1013 | 109.5      |
| H1012-C101-H1013 | 109.5      | N101-C102-C101   | 113.76(10) |
| N101-C102-C103   | 117.01(9)  | C101-C102-C103   | 117.93(10) |
| N101-C102-H1021  | 103.3      | C101-C102-H1021  | 96.9       |
| C103-C102-H1021  | 103.6      | N101-C102-C201   | 113.59(10) |
| N101-C102-C203   | 116.90(9)  | C201-C102-C203   | 117.92(10) |
| N101-C102-H1022  | 101.4      | C201-C102-H1022  | 102.2      |
| C203-C102-H1022  | 100.8      | C102-C103-C104   | 114.27(10) |
| F101-C103-C104   | 105.34(10) | F101-C103-H1032  | 107.2      |
| C104-C103-H1032  | 108.2      | C103-C104-C105   | 113.58(10) |
| C103-C104-C109   | 125.87(10) | C105-C104-C109   | 120.17(10) |
| C203-C104-C205   | 126.05(8)  | C203-C104-C209   | 113.60(8)  |
| C205-C104-C209   | 120.30(8)  | C104-C105-C106   | 119.03(10) |
| C104-C105-H1051  | 119.5      | C106-C105-H1051  | 121.4      |
| C105-C106-C107   | 119.60(10) | C105-C106-H1061  | 119.7      |
| C107-C106-H1061  | 120.7      | C106-C107-C108   | 120.70(10) |
| C106-C107-H1071  | 119.8      | C108-C107-H1071  | 119.5      |
| C107-C108-C109   | 119.95(10) | C107-C108-H1081  | 120.0      |
| C109-C108-H1081  | 120.0      | C108-C109-C104   | 120.05(10) |
| C108-C109-H1091  | 119.9      | C104-C109-H1091  | 120.0      |
| N101-C110-C111   | 110.8(4)   | N101-C110-H1101  | 109.2      |
| C111-C110-H1101  | 108.8      | N101-C110-H1102  | 109.0      |
| C111-C110-H1102  | 109.7      | H1101-C110-H1102 | 109.5      |
| C110-C111-O101   | 111.0(4)   | C110-C111-H1111  | 108.9      |
| O101-C111-H1111  | 108.9      | C110-C111-H1112  | 109.1      |
| O101-C111-H1112  | 109.4      | H1111-C111-H1112 | 109.5      |
| O101-C112-C113   | 111.1(4)   | O101-C112-H1121  | 109.6      |
| C113-C112-H1121  | 110.2      | O101-C112-H1122  | 108.6      |
| C113-C112-H1122  | 107.7      | H1121-C112-H1122 | 109.5      |
| C112-C113-N101   | 110.6(3)   | C112-C113-H1131  | 110.2      |
| N101-C113-H1131  | 109.6      | C112-C113-H1132  | 108.0      |
| N101-C113-H1132  | 108.9      | H1131-C113-H1132 | 109.5      |
| H2011-C201-H2012 | 109.5      | H2011-C201-H2013 | 109.5      |
| H2012-C201-H2013 | 109.5      | C104-C203-C102   | 114.41(10) |
| C104-C203-F201   | 105.39(10) | C104-C203-H2031  | 108.3      |
| F201-C203-H2031  | 110.3      | C104-C205-C206   | 120.03(9)  |
| C104-C205-H2051  | 120.0      | C206-C205-H2051  | 120.0      |
| C205-C206-C207   | 119.94(9)  | C205-C206-H2061  | 120.0      |

|                 |           |                 |           |
|-----------------|-----------|-----------------|-----------|
| C207-C206-H2061 | 120.1     | C206-C207-C208  | 120.74(9) |
| C206-C207-H2071 | 119.4     | C208-C207-H2071 | 119.8     |
| C207-C208-C209  | 119.74(9) | C207-C208-H2081 | 120.4     |
| C209-C208-H2081 | 119.9     | C104-C209-C208  | 119.15(9) |
| C104-C209-H2091 | 119.6     | C208-C209-H2091 | 121.2     |

---

Symmetry transformations used to generate equivalent atoms: #1  $-x+1,y,-z+3/2$

Table 4. Anisotropic displacement parameters ( $\text{\AA}^2 \times 10^3$ ) for 22097. The anisotropic displacement factor exponent takes the form:  $-2p^2[h^2 a^*2U^{11} + \dots + 2 h k a^* b^* U^{12}]$

|       | U <sup>11</sup> | U <sup>22</sup> | U <sup>33</sup> | U <sup>23</sup> | U <sup>13</sup> | U <sup>12</sup> |
|-------|-----------------|-----------------|-----------------|-----------------|-----------------|-----------------|
| Cl1   | 46(1)           | 54(1)           | 68(1)           | 4(1)            | 16(1)           | -5(1)           |
| Cl101 | 69(1)           | 67(1)           | 64(1)           | 15(1)           | 26(1)           | -1(1)           |
| F1    | 137(3)          | 60(2)           | 57(2)           | 1(1)            | 34(2)           | -6(2)           |
| F101  | 35(4)           | 44(5)           | 43(6)           | -3(4)           | 8(4)            | -2(3)           |
| F201  | 45(3)           | 47(3)           | 52(4)           | -4(2)           | 22(3)           | -2(2)           |
| O1    | 116(3)          | 61(2)           | 134(4)          | -35(2)          | 84(3)           | -9(2)           |
| O2    | 85(3)           | 133(4)          | 83(3)           | 13(3)           | 15(2)           | -30(3)          |
| O101  | 65(2)           | 56(2)           | 97(3)           | -12(2)          | 40(2)           | 12(2)           |
| O102  | 99(4)           | 78(4)           | 64(3)           | 0               | 4(3)            | 0               |
| N1    | 54(2)           | 36(2)           | 54(2)           | -2(2)           | 28(2)           | -2(2)           |
| N101  | 37(2)           | 34(2)           | 58(2)           | -4(2)           | 20(2)           | -1(1)           |
| C1    | 92(3)           | 48(3)           | 55(3)           | -6(2)           | 29(3)           | -5(2)           |
| C2    | 69(3)           | 39(2)           | 63(3)           | -4(2)           | 36(2)           | 1(2)            |
| C3    | 70(3)           | 47(3)           | 63(3)           | 0(2)            | 34(2)           | -4(2)           |
| C4    | 71(3)           | 39(2)           | 65(3)           | 3(2)            | 35(2)           | -2(2)           |
| C5    | 66(3)           | 44(3)           | 87(3)           | 3(2)            | 33(3)           | 4(2)            |
| C6    | 89(4)           | 47(3)           | 89(4)           | -5(3)           | 30(3)           | -5(3)           |
| C7    | 124(5)          | 40(3)           | 107(4)          | 4(3)            | 67(4)           | 13(3)           |
| C8    | 88(4)           | 56(3)           | 140(5)          | 16(3)           | 65(4)           | 25(3)           |
| C9    | 60(3)           | 58(3)           | 100(4)          | 6(3)            | 36(3)           | 3(2)            |
| C10   | 57(2)           | 49(3)           | 90(3)           | -9(2)           | 37(2)           | -1(2)           |
| C11   | 78(3)           | 50(3)           | 137(5)          | -8(3)           | 63(4)           | 3(3)            |
| C12   | 92(4)           | 60(3)           | 92(4)           | -27(3)          | 43(3)           | -17(3)          |
| C13   | 76(3)           | 54(3)           | 62(3)           | -14(2)          | 29(2)           | -12(2)          |
| C101  | 62(6)           | 64(5)           | 89(6)           | -10(6)          | 23(5)           | -8(5)           |
| C102  | 59(2)           | 42(2)           | 93(3)           | -8(2)           | 43(2)           | 0(2)            |
| C103  | 46(4)           | 37(4)           | 50(5)           | 0(4)            | 27(4)           | 1(4)            |
| C104  | 58(2)           | 36(2)           | 73(3)           | -6(2)           | 36(2)           | -6(2)           |
| C105  | 64(6)           | 43(5)           | 58(5)           | 1(5)            | 28(5)           | 13(6)           |
| C106  | 68(5)           | 53(6)           | 48(7)           | 7(6)            | 27(7)           | 2(6)            |
| C107  | 67(7)           | 41(5)           | 50(6)           | 4(5)            | 21(5)           | 13(4)           |
| C108  | 73(10)          | 36(6)           | 48(6)           | 9(5)            | 16(5)           | 17(6)           |
| C109  | 58(7)           | 32(6)           | 58(5)           | -1(5)           | 24(5)           | 18(6)           |
| C110  | 56(2)           | 45(2)           | 47(2)           | -4(2)           | 11(2)           | 3(2)            |
| C111  | 88(3)           | 51(3)           | 65(3)           | -15(2)          | 32(3)           | -2(3)           |
| C112  | 53(2)           | 42(3)           | 83(3)           | 6(2)            | 11(2)           | 7(2)            |
| C113  | 51(2)           | 46(2)           | 47(2)           | 3(2)            | 13(2)           | 0(2)            |
| C201  | 51(3)           | 42(3)           | 65(4)           | -14(3)          | 38(3)           | -4(3)           |

|      |       |       |       |       |       |       |
|------|-------|-------|-------|-------|-------|-------|
| C203 | 56(4) | 42(3) | 50(4) | -6(3) | 24(3) | -4(3) |
| C205 | 74(5) | 52(5) | 64(4) | -8(4) | 37(4) | 1(4)  |
| C206 | 74(5) | 56(5) | 71(6) | 19(5) | 24(5) | 4(4)  |
| C207 | 73(6) | 45(4) | 71(5) | -1(4) | 30(5) | 7(4)  |
| C208 | 79(7) | 51(5) | 64(5) | -2(4) | 24(4) | 6(5)  |
| C209 | 74(6) | 35(5) | 69(4) | -4(3) | 33(4) | 6(4)  |

---

Table 5. Hydrogen coordinates ( $\times 10^4$ ) and isotropic displacement parameters ( $\text{\AA}^2 \times 10^3$ ) for 22097.

|       | x        | y        | z        | U(eq)  |
|-------|----------|----------|----------|--------|
| H1    | 3782(11) | 7243(19) | 3430(10) | 68(2)  |
| H2    | 3362(10) | 2009(19) | 5728(10) | 63(2)  |
| H3    | 2100(40) | 4610(80) | 3290(16) | 158(2) |
| H4    | 1720(20) | 4370(70) | 2770(40) | 158(2) |
| H5    | 5190(30) | 3240(60) | 7320(30) | 131(2) |
| H11   | 3601     | 4597     | 2800     | 80     |
| H12   | 3702     | 5877     | 2672     | 80     |
| H13   | 3084     | 5503     | 2751     | 80     |
| H21   | 4258     | 5558     | 3609     | 65     |
| H31   | 3324     | 4647     | 3902     | 69     |
| H51   | 2996     | 3032     | 3368     | 79     |
| H61   | 3191     | 1194     | 3049     | 93     |
| H71   | 4223     | 616      | 3258     | 97     |
| H81   | 5054     | 1766     | 3828     | 103    |
| H91   | 4865     | 3611     | 4122     | 86     |
| H101  | 2956     | 6581     | 3942     | 75     |
| H102  | 2768     | 6755     | 3249     | 75     |
| H111  | 3054     | 8683     | 3423     | 100    |
| H112  | 2530     | 8421     | 3675     | 100    |
| H121  | 4274     | 8807     | 4739     | 100    |
| H122  | 4076     | 8942     | 4043     | 100    |
| H131  | 4580     | 7190     | 4339     | 74     |
| H132  | 4091     | 6844     | 4621     | 74     |
| H1011 | 2798     | 4564     | 5922     | 94     |
| H1012 | 2707     | 3262     | 6015     | 94     |
| H1013 | 2667     | 3709     | 5386     | 94     |
| H1021 | 3673     | 3608     | 6355     | 72     |
| H1022 | 3303     | 3964     | 5537     | 72     |
| H1032 | 3723     | 4765     | 5393     | 56     |
| H1051 | 3185     | 6426     | 5353     | 70     |
| H1061 | 3223     | 8300     | 5734     | 73     |
| H1071 | 3706     | 8594     | 6759     | 68     |
| H1081 | 4350     | 7163     | 7378     | 68     |
| H1091 | 4441     | 5352     | 6963     | 63     |
| H1101 | 4079     | 2909     | 5157     | 61     |
| H1102 | 3359     | 2674     | 4850     | 61     |
| H1111 | 3544     | 728      | 4988     | 79     |
| H1112 | 3929     | 1219     | 4623     | 79     |

|       |      |      |      |    |
|-------|------|------|------|----|
| H1121 | 4722 | 384  | 6315 | 77 |
| H1122 | 3999 | 271  | 5961 | 77 |
| H1131 | 4182 | 1840 | 6595 | 59 |
| H1132 | 4610 | 2359 | 6283 | 59 |
| H2011 | 2977 | 4399 | 6290 | 61 |
| H2012 | 3212 | 3194 | 6564 | 61 |
| H2013 | 2679 | 3296 | 5928 | 61 |
| H2031 | 4281 | 4224 | 6565 | 62 |
| H2051 | 3385 | 5979 | 5281 | 78 |
| H2061 | 3125 | 7904 | 5389 | 88 |
| H2071 | 3468 | 8749 | 6344 | 79 |
| H2081 | 4072 | 7724 | 7187 | 79 |
| H2091 | 4298 | 5773 | 7087 | 72 |

---

Table 6. Torsion angles [°] for 22097.

|                     |           |                     |           |
|---------------------|-----------|---------------------|-----------|
| C112-O101-C111-C110 | 63.3(5)   | C111-O101-C112-C113 | -63.1(5)  |
| C110-N101-C102-C201 | 137.7(4)  | C110-N101-C102-C203 | -79.7(4)  |
| C113-N101-C102-C201 | -94.8(4)  | C113-N101-C102-C203 | 47.9(4)   |
| C102-N101-C110-C111 | -178.9(4) | C113-N101-C110-C111 | 51.2(5)   |
| C102-N101-C113-C112 | 179.8(3)  | C110-N101-C113-C112 | -50.9(4)  |
| C12-O1-C11-C10      | 62.2(6)   | C11-O1-C12-C13      | -61.3(6)  |
| C201-C102-C203-F201 | -174.8(4) | N101-C102-C203-F201 | 44.2(4)   |
| N101-C102-C203-C104 | 163.8(3)  | C201-C102-C203-C104 | -55.2(4)  |
| C209-C104-C203-F201 | -116.9(7) | C209-C104-C203-C102 | 119.9(6)  |
| C205-C104-C203-C102 | -62.6(7)  | C209-C104-C205-C206 | -2.5(14)  |
| C203-C104-C209-C208 | 178.1(9)  | C203-C104-C205-C206 | -179.8(7) |
| C205-C104-C203-F201 | 60.5(8)   | C205-C104-C209-C208 | 0.5(15)   |
| N101-C110-C111-O101 | -58.2(6)  | O101-C112-C113-N101 | 57.6(5)   |
| C104-C205-C206-C207 | 2.0(16)   | C205-C206-C207-C208 | 0.7(16)   |
| C206-C207-C208-C209 | -2.7(16)  | C207-C208-C209-C104 | 2.1(17)   |
| C10-N1-C2-C1        | 71.5(4)   | C10-N1-C2-C3        | -67.1(4)  |
| C13-N1-C2-C1        | -160.2(4) | C13-N1-C2-C3        | 61.2(4)   |
| C2-N1-C10-C11       | -171.3(4) | C13-N1-C10-C11      | 55.4(5)   |
| C2-N1-C13-C12       | 175.2(4)  | C10-N1-C13-C12      | -55.8(5)  |
| N1-C2-C3-F1         | -53.3(4)  | N1-C2-C3-C4         | -172.4(3) |
| C1-C2-C3-F1         | 169.7(3)  | C1-C2-C3-C4         | 50.6(4)   |
| F1-C3-C4-C5         | 136.7(3)  | F1-C3-C4-C9         | -48.8(4)  |
| C2-C3-C4-C5         | -100.8(3) | C2-C3-C4-C9         | 73.8(4)   |
| C3-C4-C5-C6         | 176.3(3)  | C9-C4-C5-C6         | 1.4(6)    |
| C3-C4-C9-C8         | -175.6(4) | C5-C4-C9-C8         | -1.3(6)   |
| C4-C5-C6-C7         | -1.4(6)   | C5-C6-C7-C8         | 1.3(7)    |
| C6-C7-C8-C9         | -1.2(8)   | C7-C8-C9-C4         | 1.2(8)    |
| N1-C10-C11-O1       | -59.1(6)  | O1-C12-C13-N1       | 58.7(6)   |

---

Symmetry transformations used to generate equivalent atoms: #1 -x+1,y,-z+3/2
